# Supplementary material for: An agroecological approach to preparation and use of a milk protein production baseline
Source: PeerJ. 2024 Sep 23;12:e18103. doi: 10.7717/peerj.18103 (PMC11426323; doi:10.7717/peerj.18103)
Supplement: Supplemental Information 1 [file peerj-12-18103-s001.xlsx]

## Sheet: Milk Volume
Date	Tatua 78306 2018/19 Litres		Days from peak	Tatua 78306 2019/20 Litres			Tatua 78306 2020/21 Litres			Tatua 78306 2021/22 Litres				Means
2018-07-20	623.5	0.0438374	-87		0			0						Term	Fitted Mean
2018-07-21	757	0.0532237	-86		0			0						Year
2018-07-22	757	0.0532237	-85		0			0						2018	8892.1
2018-07-23	882	0.0620122	-84		0			0						2019	9864.8
2018-07-24	882	0.0620122	-83		0		748.5	0.0502046	-82					2020	9761.6
2018-07-25	1088	0.0764958	-82		0		748.5	0.0502046	-81	1067	0.0743036	-88		Days from peak
2018-07-26	1088	0.0764958	-81		0		1315	0.0882018	-80	1067	0.0743036	-87		-87	1237.6
2018-07-27	1355	0.0952682	-80	743	0.0500404	-84	1315	0.0882018	-79	1694.5	0.118001	-86		-86	1371.1
2018-07-28	1355	0.0952682	-79	1213	0.0816945	-83	2111.5	0.141626	-78	1694.5	0.118001	-85		-85	1371.1															13596.2	14329.2	14609.8	13785
2018-07-29	1637	0.115095	-78	1213	0.0816945	-82	2111.5	0.141626	-77	2601.5	0.181163	-84		-84	940.2
2018-07-30	1637	0.115095	-77	2021	0.136113	-81	3162	0.212087	-76	2601.5	0.181163	-83		-83	1175.2															Quadratic estimate
2018-07-31	1836.5	0.129122	-76	2021	0.136113	-80	3162	0.212087	-75	3116	0.216992	-82		-82	1016.5														Raw DFP	2018	2019	2020	2021
2018-08-01	1836.5	0.129122	-75	2799.5	0.188544	-79	4068	0.272855	-74	3904	0.271866	-81		-81	1285.8														-20	12181.6	14058.5	12810.7	13580.8
2018-08-02	2254.5	0.158511	-74	2799.5	0.188544	-78	4068	0.272855	-73	3904	0.271866	-80		-80	1563.7														-19	12292.1	14084.1	12967.4	13609.7
2018-08-03	2254.5	0.158511	-73	4896	0.329741	-77	4821	0.323362	-72	4615	0.321379	-79		-79	1823.2														-18	12398.1	14108.4	13117	13636.5
2018-08-04	2584.5	0.181713	-72	3308.5	0.222825	-76	4821	0.323362	-71	5144.5	0.358252	-78		-78	2182.7														-17	12499.6	14131.5	13259.4	13661
2018-08-05	2584.5	0.181713	-71	3308.5	0.222825	-75	5652	0.3791	-70	5144.5	0.358252	-77		-77	2053.6														-16	12596.7	14153.3	13394.8	13683.3
2018-08-06	2746.5	0.193103	-70	4803	0.323478	-74	5652	0.3791	-69	5607	0.39046	-76		-76	2769														-15	12689.2	14173.8	13522.9	13703.4
2018-08-07	2746.5	0.193103	-69	5525	0.372104	-73	6483.5	0.434872	-68	5607	0.39046	-75		-75	2769														-14	12777.3	14193.1	13644	13721.3
2018-08-08	3471.5	0.244076	-68	5525	0.372104	-72	6483.5	0.434872	-67	6485.5	0.451636	-74		-74	3708.5														-13	12860.8	14211	13757.9	13737
2018-08-09	3471.5	0.244076	-67	6201	0.417632	-71	7222	0.484405	-66	6485.5	0.451636	-73		-73	3949.2														-12	12939.9	14227.7	13864.6	13750.4
2018-08-10	3915.5	0.275294	-66	6201	0.417632	-70	7222	0.484405	-65	7057.5	0.491469	-72		-72	4310.2														-11	13014.4	14243.2	13964.2	13761.7
2018-08-11	3915.5	0.275294	-65	6905.5	0.465079	-69	7658	0.513649	-64	7057.5	0.491469	-71		-71	4535.5														-10	13084.5	14257.3	14056.7	13770.8
2018-08-12	4355.5	0.306229	-64	6905.5	0.465079	-68	8092	0.542759	-63	7626	0.531058	-70		-70	4866.5														-9	13150.1	14270.2	14142.1	13777.6
2018-08-13	4355.5	0.306229	-63	7252	0.488416	-67	8078	0.54182	-62	8252	0.574652	-69		-69	4378.6														-8	13211.1	14281.9	14220.3	13782.3
2018-08-14	5043	0.354567	-62	7256	0.488685	-66	8653	0.580388	-61	8448	0.588301	-68		-68	5620.2														-7	13267.7	14292.2	14291.3	13784.7
2018-08-15	5043	0.354567	-61	7668	0.516433	-65	8384	0.562345	-60	8696	0.605571	-67		-67	5735.7														-6	13319.8	14301.3	14355.3	13785
2018-08-16	5208	0.366167	-60	7812	0.526131	-64	8695	0.583205	-59	8814	0.613788	-66		-66	6131.2														-5	13367.4	14309.1	14412.1	13783
2018-08-17	5208	0.366167	-59	8488	0.571659	-63	8981	0.602388	-58	8994	0.626323	-65		-65	6268.5														-4	13410.5	14315.6	14461.7	13778.8
2018-08-18	5090.5	0.357906	-58	8300	0.558998	-62	8996	0.603394	-57	9258	0.644708	-64		-64	6608.5														-3	13449.1	14320.9	14504.3	13772.4
2018-08-19	5090.5	0.357906	-57	8522	0.573949	-61	9167	0.614864	-56	8995	0.626393	-63		-63	7983														-2	13483.2	14324.8	14539.6	13763.8
2018-08-20	5960.5	0.419075	-56	8807	0.593144	-60	9496	0.636931	-55	9540	0.664345	-62		-62	7140.3														-1	13512.9	14327.6	14567.9	13753
2018-08-21	5960.5	0.419075	-55	9156	0.616649	-59	9515	0.638205	-54	10336	0.719777	-61		-61	7406														0	13538	14329	14589	13740
2018-08-22	6637	0.466639	-54	9525	0.641501	-58	9851	0.660742	-53	10314	0.718245	-60		-60	7466.3														1	13558.6	14329.2	14603	13724.8
2018-08-23	6637	0.466639	-53	9471	0.637864	-57	10054	0.674358	-52	10109	0.703969	-59		-59	8618.5														2	13574.8	14328.1	14609.8	13707.4
2018-08-24	7225	0.50798	-52	9750	0.656654	-56	9726	0.652358	-51	10166	0.707939	-58		-58	8946														3	13586.4	14325.7	14609.5	13687.7
2018-08-25	7225	0.50798	-51	9949	0.670057	-55	10001	0.670803	-50	10291	0.716643	-57		-57	8926.5														4	13593.6	14322	14602.1	13665.9
2018-08-26	7841	0.55129	-50	9883	0.665612	-54	9630	0.645919	-49	10456	0.728134	-56		-56	8292.5														5	13596.2	14317.1	14587.5	13641.8
2018-08-27	7824	0.550095	-49	9996	0.673222	-53	10035	0.673083	-48	10535	0.733635	-55		-55	9415.5														6	13594.4	14310.9	14565.8	13615.6
2018-08-28	8092	0.568938	-48	10491	0.70656	-52	10016	0.671809	-47	10779	0.750627	-54		-54	8678.3														7	13588.1	14303.5	14536.9	13587.1
2018-08-29	8020	0.563875	-47	10404	0.7007	-51	10257	0.687974	-46	11155	0.776811	-53		-53	8828														8	13577.2	14294.7	14500.9	13556.5
2018-08-30	8451	0.594178	-46	11054	0.744477	-50	10463	0.701791	-45	10698	0.744986	-52		-52	9256.7														9	13561.9	14284.7	14457.8	13523.6
2018-08-31	8751	0.615271	-45	10944	0.737069	-49	10500	0.704273	-44	11151	0.776532	-51		-51	9118.3														10	13542.1	14273.5	14407.5	13488.5
2018-09-01	8344	0.586655	-44	11411	0.768521	-48	10829	0.72634	-43	11066	0.770613	-50		-50	9632														11	13517.8	14260.9	14350.1	13451.2
2018-09-02	8932	0.627997	-43	11392	0.767241	-47	10780	0.723053	-42	11422	0.795404	-49		-49	9466														12	13489	14247.1	14285.6	13411.7
2018-09-03	8970	0.630669	-42	11674	0.786234	-46	10525	0.705949	-41	11363	0.791295	-48		-48	9846														13	13455.7	14232	14213.9	13370
2018-09-04	9011	0.633551	-41	9707	0.653758	-45	10765	0.722047	-40	11615	0.808844	-47		-47	9809.3														14	13417.9	14215.6	14135.1	13326.1
2018-09-05	8846	0.62195	-40	11589	0.780509	-44	11078	0.743041	-39	11604	0.808078	-46		-46	10127.3														15	13375.6	14198	14049.2	13280
2018-09-06	8986	0.631794	-39	11683	0.78684	-43	11414	0.765578	-38	11687	0.813858	-45		-45	9640.3														16	13328.9	14179.1	13956.1	13231.6
2018-09-07	9140	0.642621	-38	11687	0.787109	-42	11600	0.778054	-37	11947	0.831964	-44		-44	10144.3														17	13277.6	14158.9	13855.8	13181.1
2018-09-08	9237	0.649441	-37	12211	0.8224	-41	11709	0.785365	-36	11645	0.810933	-43		-43	10481.3														18	13221.8	14137.4	13748.5	13128.3
2018-09-09	10065	0.707657	-36	11796	0.79445	-40	11835	0.793816	-35	11684	0.813649	-42		-42	10479														19	13161.6	14114.7	13634	13073.4
2018-09-10	9627	0.676861	-35	12050	0.811557	-39	11909	0.798779	-34	11701	0.814833	-41		-41	10582.3														20	13096.8	14090.7	13512.3	13016.2
2018-09-11	9766	0.686634	-34	12082	0.813712	-38	12381	0.830438	-33	11731	0.816922	-40		-40	10469
2018-09-12	10191	0.716516	-33	11757	0.791824	-37	12127	0.813401	-32	11655	0.81163	-39		-39	10704.7															13596.2	14329.2	14609.8	13785
2018-09-13	10219	0.718484	-32	12087	0.814049	-36	12106	0.811993	-31	12185	0.848538	-38		-38	10878.7
2018-09-14	10531	0.74042	-31	12604	0.848869	-35	12355	0.828694	-30	12013	0.83656	-37		-37	10864.7
2018-09-15	9984	0.701962	-30	12478	0.840383	-34	12440	0.834395	-29	12033	0.837953	-36		-36	11287
2018-09-16	10450	0.734725	-29	12540	0.844558	-33	12383	0.830572	-28	12199	0.849513	-35		-35	11355.3
2018-09-17	11106	0.780848	-28	12954	0.872441	-32	12456	0.835469	-27	12245	0.852716	-34		-34	11384.3
2018-09-18	11221	0.788933	-27	13200	0.889009	-31	12701	0.851902	-26	12217	0.850766	-33		-33	11704
2018-09-19	11567	0.81326	-26	13350	0.899111	-30	12925	0.866926	-25	12487	0.869568	-32		-32	11766.7
2018-09-20	11308	0.79505	-25	13698	0.922548	-29	12956	0.869005	-24	12850	0.894847	-31		-31	11945.7
2018-09-21	11806	0.830064	-24	13580	0.914601	-28	12936	0.867664	-23	13162	0.916574	-30		-30	11896.3
2018-09-22	12187	0.856852	-23	14126	0.951374	-27	13211	0.886109	-22	13294	0.925766	-29		-29	12196
2018-09-23	12036	0.846235	-22	14067	0.9474	-26	13485	0.904487	-21	13269	0.924025	-28		-28	12356.3
2018-09-24	12398	0.871687	-21	14617	0.984442	-25	13455	0.902475	-20	13657	0.951045	-27		-27	12601
2018-09-25	12383	0.870632	-20	14446	0.972926	-24	13510	0.906164	-19	13576	0.945404	-26		-26	12778.3
2018-09-26	12368	0.869577	-19	14132	0.951778	-23	13367	0.896573	-18	13364	0.930641	-25		-25	12950
2018-09-27	12006	0.844126	-18	14410	0.970501	-22	12465	0.836072	-17	13681	0.952716	-24		-24	13069.3
2018-09-28	13157	0.925051	-17	14423	0.971377	-21	13257	0.889194	-16	13712	0.954875	-23		-23	13085
2018-09-29	12817	0.901146	-16	13950	0.93952	-20	13073	0.876853	-15	13207	0.919708	-22		-22	13219
2018-09-30	12837	0.902552	-15	14458	0.973734	-19	12870	0.863237	-14	13496.5	0.939868	-21		-21	13435.3
2018-10-01	12584	0.884764	-14	14263	0.960601	-18	13625	0.913878	-13	13786	0.960028	-20		-20	12971.3
2018-10-02	12599	0.885819	-13	14171	0.954405	-17	13509	0.906097	-12	13813	0.961908	-19		-19	13445.3
2018-10-03	12324	0.866484	-12	14178	0.954876	-16	13710	0.919579	-11	13404	0.933426	-18		-18	13212
2018-10-04	12502	0.878999	-11	14151	0.953058	-15	14072	0.943859	-10	13579	0.945613	-17		-17	13791.7
2018-10-05	12680	0.891514	-10	14134	0.951913	-14	14387	0.964988	-9	13052	0.908914	-16		-16	13417.3
2018-10-06	12828	0.901919	-9	14194	0.955954	-13	14619	0.980549	-8	14093	0.981407	-15		-15	13353.7
2018-10-07	13165.5	0.925649	-8	13590	0.915275	-12	14451	0.96928	-7	13738	0.956685	-14		-14	13196
2018-10-08	13503	0.949378	-7	13902	0.936288	-11	14748	0.989201	-6	14047	0.978203	-13		-13	13472.7
2018-10-09	13175	0.926317	-6	14352	0.966595	-10	14304	0.95942	-5	13367	0.93085	-12		-12	13141
2018-10-10	13291	0.934472	-5	14446	0.972926	-9	14843	0.995573	-4	14016	0.976045	-11		-11	13499
2018-10-11	13427	0.944034	-4	14212	0.957166	-8	14655	0.982963	-3	13445	0.936281	-10		-10	13701.3
2018-10-12	13781	0.968924	-3	14117	0.950768	-7	14587	0.978402	-2	13949	0.971379	-9		-9	13887
2018-10-13	14087	0.990438	-2	14236	0.958782	-6	14766	0.990408	-1	13632	0.949304	-8		-8	13628.3
2018-10-14	13964	0.98179	-1	14683	0.988887	-5	14909	1	0	13421	0.93461	-7		-7	14023.7
2018-10-15	14223	1	0	14353	0.966662	-4	14412	0.966664	1	13548	0.943454	-6		-6	14053
2018-10-16	14011	0.985095	1	14377	0.968279	-3	14752	0.989469	2	14212	0.989694	-5		-5	14092.7
2018-10-17	13799	0.970189	2	14413	0.970703	-2	14346	0.962238	3	13724	0.95571	-4		-4	14207.7
2018-10-18	13829	0.972298	3	13929	0.938106	-1	14537	0.975049	4	13938	0.970613	-3		-3	14271
2018-10-19	13468	0.946917	4	14848	1	0	14756	0.989738	5	13886	0.966992	-2		-2	14362.3
2018-10-20	13514	0.950151	5	14153	0.953192	1	14683	0.984841	6	13433	0.935446	-1		-1	14219.7
2018-10-21	13855	0.974126	6	13911	0.936894	2	14262	0.956603	7	14360	1	0		0	14660
2018-10-22	13603	0.956409	7	14713	0.990908	3	14253	0.956	8	13906	0.968384	1		1	13810.7
2018-10-23	13608	0.95676	8	14660	0.987338	4	14637	0.981756	9	13968	0.972702	2		2	14154
2018-10-24	12978	0.912466	9	14123	0.951172	5	14515	0.973573	10	13853	0.964694	3		3	14296
2018-10-25	12825	0.901709	10	14308	0.963631	6	14063	0.943256	11	13855	0.964833	4		4	14221.7
2018-10-26	12705	0.893271	11	14628	0.985183	7	14696	0.985713	12	13450	0.93663	5		5	14131
2018-10-27	13281	0.933769	12	14498	0.976428	8	13895	0.931987	13	13838	0.963649	6		6	14282
2018-10-28	13219	0.92941	13	14559	0.980536	9	13686	0.917969	14	13521	0.941574	7		7	14164.3
2018-10-29	13485	0.948112	14	14444	0.972791	10	13502	0.905627	15	13553	0.943802	8		8	14119.7
2018-10-30	13307	0.935597	15	14379	0.968413	11	14086	0.944798	16	13651	0.950627	9		9	14058
2018-10-31	13265	0.932644	16	13672	0.920797	12	14498	0.972433	17	13167	0.916922	10		10	13928
2018-11-01	13441	0.945019	17	13557	0.913052	13	13540	0.908176	18	12949	0.901741	11		11	13715.7
2018-11-02	13486	0.948183	18	13997	0.942686	14	13205	0.885707	19	13347	0.929457	12		12	13883
2018-11-03	13500	0.949167	19	13950	0.93952	15	14151	0.949158	20	13325	0.927925	13		13	13557
2018-11-04	13270	0.932996	20	14538	0.979122	16	14118	0.946945	21	12960	0.902507	14		14	13722.7
2018-11-05	13363	0.939535	21	14233	0.95858	17	14102	0.945872	22	13163	0.916643	15		15	13586.3
2018-11-06	13174	0.926246	22	14223	0.957907	18	13705	0.919243	23	12845	0.894499	16		16	13963
2018-11-07	13336	0.937636	23	14274	0.961342	19	14042	0.941847	24	12928	0.900279	17		17	14057.3
2018-11-08	12834	0.902341	24	14056	0.946659	20	13744	0.921859	25	13385	0.932103	18		18	13749.7
2018-11-09	12561	0.883147	25	14051	0.946323	21	14091	0.945134	26	13442	0.936072	19		19	13659.7
2018-11-10	12554	0.882655	26	13658	0.919855	22	12942	0.868066	27	13462	0.937465	20		20	13825.7
2018-11-11	12652	0.889545	27	13887	0.935277	23	13736	0.921323	28	13083	0.911072	21		21	13844
2018-11-12	12986	0.913028	28	14064	0.947198	24	13269	0.889999	29	13108	0.912813	22		22	13644.7
2018-11-13	12579	0.884413	29	14106	0.950027	25	13035	0.874304	30	13521	0.941574	23		23	13642.7
2018-11-14	12548	0.882233	30	13866	0.933863	26	12968	0.86981	31	12785	0.89032	24		24	13646.7
2018-11-15	13105	0.921395	31	13845	0.932449	27	12883	0.864109	32	12883	0.897145	25		25	13470.3
2018-11-16	12385	0.870773	32	13651	0.919383	28	12700	0.851834	33	13175	0.917479	26		26	13503.7
2018-11-17	11773	0.827744	33	13336	0.898168	29	12904	0.865517	34	12521	0.871936	27		27	13146.3
2018-11-18	12144	0.853828	34	13666	0.920393	30	12904	0.865517	35	12351	0.860097	28		28	13457.7
2018-11-19	11911	0.837446	35	13255	0.892713	31	12973	0.870146	36	12630	0.879526	29		29	13061.3
2018-11-20	12917	0.908177	36	13088	0.881466	32	12831	0.860621	37	12340	0.859331	30		30	13083
2018-11-21	12437	0.874429	37	12533	0.844087	33	12483	0.837279	38	13031	0.907451	31		31	13109.3
2018-11-22	12414	0.872812	38	13330	0.897764	34	12776	0.856932	39	12317	0.85773	32		32	12785.3
2018-11-23	12616	0.887014	39	13393	0.902007	35	12621	0.846536	40		0			33	12335.3
2018-11-24	11940	0.839485	40	13888	0.935345	36	12738	0.854383	41		0			34	12792.7
2018-11-25	12171	0.855727	41	13661	0.920057	37	12464	0.836005	42		0			35	12736
2018-11-26	12109	0.851368	42	14014	0.943831	38	11975	0.803206	43		0			36	13259.3
2018-11-27	12420	0.873233	43	13357	0.899582	39	11872	0.796298	44		0			37	12976.3
2018-11-28	11820	0.831048	44	13575	0.914265	40	11861	0.79556	45		0			38	12970.3
2018-11-29	12622	0.887436	45	13494	0.908809	41	11723	0.786304	46		0			39	12916.3
2018-11-30	12260	0.861984	46	13322	0.897225	42	11577	0.776511	47		0			40	12712
2018-12-01	11737	0.825213	47	12537	0.844356	43	11619	0.779328	48		0			41	12801
2018-12-02	11813	0.830556	48	13297	0.895541	44	11526	0.77309	49		0			42	12631.7
2018-12-03	12785	0.898896	49	13055	0.879243	45	11410	0.76531	50		0			43	12310.7
2018-12-04	9987	0.702173	50	13111	0.883015	46	11386	0.7637	51		0			44	12329.7
2018-12-05	11528	0.810518	51	12802	0.862204	47	11343	0.760816	52		0			45	12512.7
2018-12-06	11837	0.832244	52	12790	0.861395	48	11452	0.768127	53		0			46	12364.7
2018-12-07	11982	0.842438	53	13021	0.876953	49	11596	0.777785	54		0			47	12038.7
2018-12-08	11653	0.819307	54	12895	0.868467	50	11368	0.762492	55		0			48	12074
2018-12-09	12210	0.858469	55	13374	0.900727	51	11742	0.787578	56		0			49	12444
2018-12-10	12313	0.86571	56	12816	0.863147	52	11737	0.787243	57		0			50	11845.5
2018-12-11	11598	0.81544	57	12986	0.874596	53	11586	0.777114	58		0			51	12096
2018-12-12	12444	0.874921	58	12902	0.868939	54	11064	0.742102	59		0			52	11998.7
2018-12-13	11881	0.835337	59	13075	0.88059	55	11640	0.780736	60		0			53	12140
2018-12-14	11210	0.78816	60	12955	0.872508	56	11486	0.770407	61		0			54	12050.3
2018-12-15	11030	0.775504	61	12741	0.858095	57	11507	0.771816	62		0			55	12217.7
2018-12-16	11277	0.792871	62	12731	0.857422	58	11342	0.760749	63		0			56	12336.7
2018-12-17	11504	0.808831	63	13074	0.880523	59	11787	0.790596	64		0			57	12025.3
2018-12-18	11355	0.798355	64	12716	0.856412	60	12008	0.80542	65		0			58	12253.7
2018-12-19	11689	0.821838	65	12773	0.860251	61	11767	0.789255	66		0			59	12006.3
2018-12-20	11394	0.801097	66	12607	0.849071	62	12237	0.820779	67		0			60	11855.3
2018-12-21	11442	0.804472	67	12811	0.86281	63	12387	0.83084	68		0			61	11763
2018-12-22	11596	0.815299	68	12645	0.85163	64	12029	0.806828	69		0			62	11797
2018-12-23	10759	0.756451	69	12677	0.853785	65	12011	0.805621	70		0			63	11885.7
2018-12-24	11425	0.803276	70	12832	0.864224	66	11956	0.801932	71		0			64	11929
2018-12-25	11840	0.832454	71	12434	0.837419	67	11143	0.747401	72		0			65	12124.7
2018-12-26	11230	0.789566	72	13357	0.899582	68	11484	0.770273	73		0			66	11997.7
2018-12-27	11320	0.795894	73	12499	0.841797	69	11326	0.759675	74		0			67	12037.7
2018-12-28	11161	0.784715	74	12392	0.834591	70	12033	0.807096	75		0			68	12446.7
2018-12-29	11439	0.804261	75	12234	0.823949	71	11354	0.761553	76		0			69	11762.3
2018-12-30	11317	0.795683	76	12102	0.815059	72	12159	0.815548	77		0			70	11942.7
2018-12-31	11345	0.797652	77	12384	0.834052	73	12148	0.81481	78		0			71	12010
2019-01-01	11619	0.816916	78	12713	0.85621	74	11894	0.797773	79		0			72	11491.7
2019-01-02	10873	0.764466	79	12617	0.849744	75	11769	0.789389	80		0			73	11729.3
2019-01-03	11469	0.80637	80	12450	0.838497	76	11255	0.754913	81		0			74	11733.3
2019-01-04	10567	0.742952	81	12400	0.835129	77	11342	0.760749	82		0			75	12029.7
2019-01-05	11774	0.827814	82	12196	0.82139	78	11575	0.776377	83		0			76	11707
2019-01-06	11318	0.795753	83	12201	0.821727	79	11234	0.753505	84		0			77	11968
2019-01-07	11148	0.783801	84	12908	0.869343	80	11357	0.761755	85		0			78	11987.7
2019-01-08	10854	0.76313	85	12912	0.869612	81	11362	0.76209	86		0			79	11656
2019-01-09	11204	0.787738	86	12501	0.841932	82	11320	0.759273	87		0			80	12048.7
2019-01-10	10413	0.732124	87	12491	0.841258	83	11160	0.748541	88		0			81	11578
2019-01-11	10804	0.759615	88	12620	0.849946	84	11810	0.792139	89		0			82	11872.3
2019-01-12	10062	0.707446	89	12313	0.82927	85	11915	0.799182	90		0			83	11794.7
2019-01-13	9456	0.664839	90	12227	0.823478	86	11530	0.773358	91		0			84	11667.3
2019-01-14	9790	0.688322	91	11783	0.793575	87	11431	0.766718	92		0			85	11508
2019-01-15	9752	0.68565	92	11519	0.775795	88	10978	0.736334	93		0			86	11597.7
2019-01-16	9759	0.686142	93	10031	0.675579	89	10922	0.732578	94		0			87	11172
2019-01-17	10830	0.761443	94	11633	0.783473	90	10997	0.737608	95		0			88	11161
2019-01-18	10588	0.744428	95	10999	0.740773	91	11321	0.75934	96		0			89	10634.3
2019-01-19	10513	0.739155	96	11228	0.756196	92	11632	0.7802	97		0			90	11467
2019-01-20	10280	0.722773	97	10857	0.73121	93	11414	0.765578	98		0			91	10773
2019-01-21	10184	0.716023	98	10602	0.714036	94	11447	0.767791	99		0			92	10803.7
2019-01-22	10227	0.719047	99	10683	0.719491	95	11361	0.762023	100		0			93	10531.3
2019-01-23	10240	0.719961	100	10298	0.693561	96	11521	0.772755	101		0			94	10784.7
2019-01-24	10678	0.750756	101	10027	0.67531	97	11504	0.771614	102		0			95	10756
2019-01-25	10317	0.725374	102	10088	0.679418	98	11377	0.763096	103		0			96	10710.7
2019-01-26	9599	0.674893	103	9654	0.650189	99	11056	0.741565	104		0			97	10646.3
2019-01-27	9692	0.681431	104	10008	0.67403	100	10896	0.730834	105		0			98	10562
2019-01-28	9652	0.678619	105	9707	0.653758	101	10234	0.686431	106		0			99	10442.7
2019-01-29	9381	0.659565	106	9573	0.644733	102	10330	0.69287	107		0			100	10536.3
2019-01-30	9886	0.695071	107	9572	0.644666	103	9987	0.669864	108		0			101	10635.3
2019-01-31	9912	0.696899	108	9676	0.65167	104	10079	0.676035	109		0			102	10464.7
2019-02-01	10593	0.74478	109	9309	0.626953	105	10340	0.693541	110		0			103	10182.7
2019-02-02	9917	0.697251	110	9314	0.62729	106	10227	0.685961	111		0			104	10141.3
2019-02-03	9494	0.66751	111	9388	0.632274	107	10323	0.692401	112		0			105	9952.3
2019-02-04	9738	0.684666	112	9265	0.62399	108	10086	0.676504	113		0			106	9643
2019-02-05	9553	0.671659	113	9593	0.64608	109	9512	0.638004	114		0			107	9868
2019-02-06	9493	0.66744	114	9062	0.610318	110	9747	0.653766	115		0			108	9721.3
2019-02-07	9536	0.670463	115	8996	0.605873	111	10009	0.671339	116		0			109	10088.3
2019-02-08	9464	0.665401	116	8776	0.591056	112	9865	0.661681	117		0			110	9773
2019-02-09	9116	0.640934	117	9031	0.60823	113	9847	0.660474	118		0			111	9572.3
2019-02-10	9567	0.672643	118	8301	0.559065	114	10044	0.673687	119		0			112	9612.3
2019-02-11	9277	0.652253	119	8058	0.542699	115	9877	0.662486	120		0			113	9556.7
2019-02-12	9564	0.672432	120	8287	0.558122	116	9922	0.665504	121		0			114	9102
2019-02-13	9367	0.658581	121	8489	0.571727	117	9680	0.649272	122		0			115	9113.7
2019-02-14	9049	0.636223	122	8524	0.574084	118	9595	0.643571	123		0			116	9253.3
2019-02-15	9353	0.657597	123	9003	0.606344	119	9966	0.668455	124		0			117	9156.7
2019-02-16	9344	0.656964	124	8657	0.583041	120	9663	0.648132	125		0			118	9312.7
2019-02-17	9191	0.646207	125	8480	0.571121	121	9095	0.610034	126		0			119	9441.3
2019-02-18	8882	0.624481	126	8231	0.554351	122	9030	0.605674	127		0			120	9366
2019-02-19	8672	0.609717	127	8102	0.545663	123	9411	0.631229	128		0			121	9256.3
2019-02-20	8764	0.616185	128	7990	0.53812	124	9665	0.648266	129		0			122	8986.7
2019-02-21	9148	0.643184	129	7831	0.527411	125	9854	0.660943	130		0			123	9016.7
2019-02-22	8568	0.602405	130	7977	0.537244	126	9794	0.656919	131		0			124	9100
2019-02-23	8912	0.626591	131	7772	0.523438	127	9663	0.648132	132		0			125	8895
2019-02-24	8860	0.622935	132	7734	0.520878	128	10106	0.677846	133		0			126	8651.3
2019-02-25	8965	0.630317	133	7672	0.516703	129	8779	0.588839	134		0			127	8491.3
2019-02-26	9129	0.641848	134	8206	0.552667	130	8788	0.589443	135		0			128	8636.3
2019-02-27	8765	0.616255	135	8130	0.547548	131	8586	0.575894	136		0			129	8828.3
2019-02-28	8533	0.599944	136	8361	0.563106	132	8184	0.54893	137		0			130	8876
2019-03-01	8363	0.587991	137	8017	0.539938	133	8451	0.566839	138		0			131	8945.3
2019-03-02	8102	0.569641	138	8181	0.550983	134	8530	0.572138	139		0			132	8961.3
2019-03-03	8452	0.594249	139	8084	0.54445	135	8507	0.570595	140		0			133	9029.3
2019-03-04	8065	0.567039	140	7756	0.52236	136	8510	0.570796	141		0			134	8696.3
2019-03-05	8008	0.563032	141	7808	0.525862	137	8446	0.566503	142		0			135	8545.7
2019-03-06	8251	0.580117	142	7974	0.537042	138	8351	0.560131	143		0			136	8291.7
2019-03-07	8219	0.577867	143	7928	0.533944	139	8364	0.561003	144		0			137	8118.3
2019-03-08	8038	0.565141	144	7950	0.535426	140	8189	0.549266	145		0			138	8175.7
2019-03-09	7757	0.545384	145	7731	0.520676	141	8681	0.582266	146		0			139	8303.3
2019-03-10	7858	0.552485	146	7868	0.529903	142	8453	0.566973	147		0			140	8174
2019-03-11	7939	0.55818	147	7712	0.519397	143	8468	0.567979	148		0			141	8083
2019-03-12	7886	0.554454	148	7790	0.52465	144	8495	0.56979	149		0			142	8188.3
2019-03-13	7703	0.541588	149	7746	0.521686	145	8498	0.569991	150		0			143	8094
2019-03-14	7681	0.540041	150	7476	0.503502	146	8227	0.551814	151		0			144	8064
2019-03-15	7644	0.537439	151	7197	0.484712	147	8410	0.564089	152		0			145	7897.3
2019-03-16	7962	0.559798	152	7589	0.511113	148	8476	0.568516	153		0			146	8005
2019-03-17	7785	0.547353	153	7435	0.500741	149	8374	0.561674	154		0			147	7863
2019-03-18	7799	0.548337	154	7403	0.498586	150	8645	0.579851	155		0			148	7981
2019-03-19	7846	0.551642	155	7107	0.47865	151	8393	0.562949	156		0			149	7877.7
2019-03-20	7295	0.512902	156	7496	0.504849	152	8660	0.580857	157		0			150	7860.7
2019-03-21	7636	0.536877	157	6873	0.462891	153	8457	0.567241	158		0			151	7659.3
2019-03-22	7586	0.533361	158	7186	0.483971	154	8316	0.557784	159		0			152	7956
2019-03-23	7584	0.533221	159	7155	0.481883	155	8108	0.543833	160		0			153	7711.3
2019-03-24	7558	0.531393	160	7164	0.482489	156	8375	0.561741	161		0			154	7786.3
2019-03-25	7261	0.510511	161	7040	0.474138	157	8400	0.563418	162		0			155	7882
2019-03-26	7136	0.501723	162	7103	0.478381	158	7412	0.497149	163		0			156	7617.3
2019-03-27	7212	0.507066	163	7313	0.492524	159	7840	0.525857	164		0			157	7778.7
2019-03-28	7447	0.523589	164	7313	0.492524	160	7155	0.479911	165		0			158	7715.3
2019-03-29	7443	0.523307	165	7309.5	0.492289	161	7812	0.523979	166		0			159	7737.7
2019-03-30	7538	0.529987	166	7309.5	0.492289	162	7621	0.511168	167		0			160	7659.7
2019-03-31	7657	0.538353	167	7039	0.474071	163	7523	0.504595	168		0			161	7648.5
2019-04-01	7698	0.541236	168	7039	0.474071	164	7648	0.512979	169		0			162	7615.2
2019-04-02	7652	0.538002	169	7532	0.507274	165	7493	0.502582	170		0			163	7221
2019-04-03	7632	0.536596	170	7532	0.507274	166	7658	0.513649	171		0			164	7442
2019-04-04	7871	0.553399	171	7891	0.531452	167	7927	0.531692	172		0			165	7376.7
2019-04-05	7878	0.553892	172	7891	0.531452	168	7482	0.501845	173		0			166	7627.3
2019-04-06	7582	0.53308	173	7593	0.511382	169	7798	0.52304	174		0			167	7723
2019-04-07	7820	0.549814	174	8051	0.542228	170	7776	0.521564	175		0			168	7704
2019-04-08	7416	0.521409	175	8031	0.540881	171	7893	0.529412	176		0			169	7631
2019-04-09	7155	0.503058	176	7964	0.536369	172	7803	0.523375	177		0			170	7725.3
2019-04-10	6911	0.485903	177	8150	0.548895	173	7947	0.533034	178		0			171	7853.3
2019-04-11	7011	0.492934	178	8309	0.559604	174	7928	0.531759	179		0			172	7923
2019-04-12	7465	0.524854	179	7916	0.533136	175	8044	0.53954	180		0			173	7738
2019-04-13	7339	0.515995	180	8035	0.54115	176	7754	0.520089	181		0			174	7975.7
2019-04-14	7308	0.513816	181	8177	0.550714	177	7995	0.536253	182		0			175	7702.7
2019-04-15	7384	0.519159	182	8251	0.555698	178	7398	0.49621	183		0			176	7694.3
2019-04-16	7497	0.527104	183	7948	0.535291	179	7969	0.534509	184		0			177	7630.3
2019-04-17	7299	0.513183	184	8012	0.539601	180	7750	0.51982	185		0			178	7736.3
2019-04-18	7207	0.506714	185	8260	0.556304	181	7763	0.520692	186		0			179	7780.3
2019-04-19	7167	0.503902	186	8087	0.544652	182	7394	0.495942	187		0			180	7798.3
2019-04-20	7444	0.523378	187	7928	0.533944	183	7708	0.517003	188		0			181	7774
2019-04-21	7177	0.504605	188	8184	0.551185	184	7772	0.521296	189		0			182	7822
2019-04-22	6914	0.486114	189	8039	0.54142	185	7948	0.533101	190		0			183	7607.7
2019-04-23	6571	0.461998	190	8130	0.547548	186	7484	0.501979	191		0			184	7817.3
2019-04-24	6761	0.475357	191	8069	0.54344	187	7945	0.5329	192		0			185	7665.3
2019-04-25	6311	0.443718	192	7831	0.527411	188	7836	0.525589	193		0			186	7686.7
2019-04-26	7016	0.493286	193	8094	0.545124	189	7915	0.530887	194		0			187	7635.7
2019-04-27	7284	0.512128	194	8256	0.556034	190	7424	0.497954	195		0			188	7572
2019-04-28	6594	0.463615	195	7959	0.536032	191	7802	0.523308	196		0			189	7593.3
2019-04-29	6527	0.458905	196	7783	0.524178	192	7582	0.508552	197		0			190	7591.7
2019-04-30	6420	0.451382	197	7630	0.513874	193	7515	0.504058	198		0			191	7401.3
2019-05-01	6375	0.448218	198	7676	0.516972	194	8069	0.541217	199		0			192	7346.3
2019-05-02	4736	0.332982	199	7643	0.514749	195	7483	0.501912	200		0			193	7494
2019-05-03	5242	0.368558	200	7497	0.504916	196	7285	0.488631	201		0			194	7625
2019-05-04	5134	0.360965	201	7798	0.525189	197	7627	0.51157	202		0			195	7220.3
2019-05-05	4945	0.347676	202	7987	0.537918	198	7495	0.502716	203		0			196	7275.3
2019-05-06	5508	0.38726	203	7311	0.49239	199	9124	0.611979	204		0			197	7266.7
2019-05-07	5361	0.376925	204	7263	0.489157	200	8080	0.541955	205		0			198	7292.3
2019-05-08	5286	0.371652	205	7317	0.492794	201	5652	0.3791	206		0			199	6705.3
2019-05-09	5449	0.383112	206	7353	0.495218	202	6183	0.414716	207		0			200	6662.7
2019-05-10	5595	0.393377	207	7329	0.493602	203	8416	0.564491	208		0			201	6578.7
2019-05-11	5784	0.406665	208	7710	0.519262	204	5554	0.372527	209		0			202	6641.7
2019-05-12	5192	0.365043	209	7695	0.518252	205	7798	0.52304	210		0			203	6777.3
2019-05-13	5556	0.390635	210	7613	0.512729	206	5408	0.362734	211		0			204	6663.2
2019-05-14	4835	0.339942	211	7501	0.505186	207	7584	0.508686	212		0			205	7020.3
2019-05-15	5356.5	0.376608	212	7565	0.509496	208	4883	0.32752	213		0			206	6238
2019-05-16	5356.5	0.376608	213	7097	0.477977	209	6026	0.404185	214		0			207	6426.3
2019-05-17	5664.5	0.398263	214	7229	0.486867	210	4410	0.295794	215		0			208	7255
2019-05-18	5664.5	0.398263	215	6135	0.413187	211	4004	0.268563	216		0			209	5947.7
2019-05-19	4950.5	0.348063	216	5639	0.379782	212	3871	0.259642	217		0			210	6861
2019-05-20	4950.5	0.348063	217	5730	0.385911	213	3474	0.233014	218		0			211	5459.3
2019-05-21	3876.5	0.272552	218	4814	0.324219	214	3102	0.208062	219		0			212	6193.2
2019-05-22	3876.5	0.272552	219	4736	0.318966	215	2041	0.136897	220		0			213	5323.2
2019-05-23	1420.5	0.0998734	220	3290	0.221579	216	2041	0.136897	221		0			214	5501.5
2019-05-24	1420.5	0.0998734	221				1784.5	0.119693	222		0			215	4266
2019-05-25							1784.5	0.119693	223		0			216	3340
2019-05-26							1897	0.127239	224		0			217	4590.1
2019-05-27							1868.5	0.125327	225		0			218	3854.6
2019-05-28							1868.5	0.125327	226		0			219	3668.6
2019-05-29							1484	0.0995372	227		0			220	1910.1
2019-05-30							1484	0.0995372	228		0			221	1910.1
2019-05-31							1076	0.0721712	229		0			222	1529.1
2020-05-31											0			223	1529.1
														224	1641.6
														225	1613.1
														226	1613.1
														227	1228.6
														228	1228.6
														229	820.6

## Sheet: MVcow
Date	Tatua 78306 2018/19 Litres	Cows	Yield/cow		Days from peak	Tatua 78306 2019/20 Litres	Cows	Yield/cow			Tatua 78306 2020/21 Litres	Cows	Yield/cow			Tatua 78306 2021/22 Litres	Cows	Yield/cow					Means
2018-07-20	623.5	617.222	1.01017	0.0438374	-87				0					0									Term	Fitted Mean
2018-07-21	757	588.182	1.28702	0.0532237	-86				0					0									Year
2018-07-22	757	588.182	1.28702	0.0532237	-85				0					0									2018	15.0172
2018-07-23	882	605.769	1.456	0.0620122	-84				0					0						Est urine urea (g)			2019	16.7445		MU	Est urine urea (g)
2018-07-24	882	605.769	1.456	0.0620122	-83				0		748.5	587.917	1.27314	0.0502046	-82				[MU]				2020	16.4396	[MU]	Yield (mg)
2018-07-25	1088	597.812	1.81997	0.0764958	-82				0		748.5	587.917	1.27314	0.0502046	-81	1067	590	1.80847	15.3	22.1357	-88		Days from peak
2018-07-26	1088	597.812	1.81997	0.0764958	-81				0		1315	596.905	2.20303	0.0882018	-80	1067	590	1.80847	15.3	22.1357	-87		-87	2.06	15.06	310.236	24.8189
2018-07-27	1355	601.75	2.25177	0.0952682	-80	743	563.333	1.31893	0.0500404	-84	1315	596.905	2.20303	0.0882018	-79	1694.5	590	2.87203	13.1	30.0989	-86		-86	2.34	12.62	295.308	23.6246
2018-07-28	1355	601.75	2.25177	0.0952682	-79	1213	563.333	2.15325	0.0816945	-83	2111.5	585.588	3.60578	0.141626	-78	1694.5	590	2.87203	13.1	30.0989	-85		-85	2.34	15.73	368.082	29.4466
2018-07-29	1637	592.6	2.7624	0.115095	-78	1213	582.368	2.08287	0.0816945	-82	2111.5	585.588	3.60578	0.141626	-77	2601.5	590	4.40932	12.7	44.7987	-84		-84	1.574	15.43	242.868	19.4295
2018-07-30	1637	592.6	2.7624	0.115095	-77	2021	582.368	3.47031	0.136113	-81	3162	592.4	5.33761	0.212087	-76	2601.5	590	4.40932	13.1	46.2097	-83		-83	1.991	14.87	296.062	23.6849
2018-07-31	1836.5	598.036	3.07089	0.129122	-76	2021	597.742	3.38106	0.136113	-80	3162	592.4	5.33761	0.212087	-75	3116	590	5.28136	13.1	55.3486	-82		-82	1.725	15.1	260.475	20.838
2018-08-01	1836.5	598.036	3.07089	0.129122	-75	2799.5	597.742	4.68346	0.188544	-79	4068	587.692	6.92199	0.272855	-74	3904	590	6.61695	16.4	86.8144	-81		-81	2.188	15.37	336.296	26.9036
2018-08-02	2254.5	582.206	3.87234	0.158511	-74	2799.5	586.591	4.77249	0.188544	-78	4068	587.692	6.92199	0.272855	-73	3904	590	6.61695	20.2	106.93	-80		-80	2.612	15.23	397.808	31.8246
2018-08-03	2254.5	582.206	3.87234	0.158511	-73	4896	586.591	8.34653	0.329741	-77	4821	593.092	8.12859	0.323362	-72	4615	590	7.82203	20.2	126.404	-79		-79	3.046	16.13	491.32	39.3056
2018-08-04	2584.5	593.846	4.35214	0.181713	-72	3308.5	593.247	5.57694	0.222825	-76	4821	593.092	8.12859	0.323362	-71	5144.5	590	8.71949	20.2	140.907	-78		-78	3.714	16.13	599.068	47.9255
2018-08-05	2584.5	593.846	4.35214	0.181713	-71	3308.5	668.523	4.94897	0.222825	-75	5652	590.909	9.56492	0.3791	-70	5144.5	590	8.71949	20.2	140.907	-77		-77	4.905	15.93	781.367	62.5093
2018-08-06	2746.5	589.167	4.66167	0.193103	-70	4803	668.523	7.1845	0.323478	-74	5652	590.909	9.56492	0.3791	-69	5607	590	9.50339	18.4	139.89	-76		-76	4.662	16.27	758.507	60.6806
2018-08-07	2746.5	589.167	4.66167	0.193103	-69	5525	592.192	9.32975	0.372104	-73	6483.5	590.65	10.9769	0.434872	-68	5607	590	9.50339	18.4	139.89	-75		-75	4.452	16.13	718.108	57.4486
2018-08-08	3471.5	589.4	5.88989	0.244076	-68	5525	586.726	9.41666	0.372104	-72	6483.5	590.65	10.9769	0.434872	-67	6485.5	590	10.9924	17	149.496	-74		-74	5.993	16.77	1005.03	80.4021
2018-08-09	3471.5	589.4	5.88989	0.244076	-67	6201	586.726	10.5688	0.417632	-71	7222	591.441	12.2108	0.484405	-66	6485.5	590	10.9924	17	149.496	-73		-73	6.708	16.33	1095.42	87.6333
2018-08-10	3915.5	594.138	6.59022	0.275294	-66	6201	592.097	10.473	0.417632	-70	7222	591.441	12.2108	0.484405	-65	7057.5	590	11.9619	15.9	152.155	-72		-72	7.299	16.23	1184.63	94.7702
2018-08-11	3915.5	594.138	6.59022	0.275294	-65	6905.5	592.097	11.6628	0.465079	-69	7658	588.938	13.0031	0.513649	-64	7057.5	590	11.9619	15.4	147.37	-71		-71	7.683	15.13	1162.44	92.995
2018-08-12	4355.5	588.03	7.40693	0.306229	-64	6905.5	592.67	11.6515	0.465079	-68	8092	590.268	13.709	0.542759	-63	7626	590	12.9254	12.9	133.39	-70		-70	8.233	14.23	1171.56	93.7245
2018-08-13	4355.5	588.03	7.40693	0.306229	-63	7252	592.67	12.2362	0.488416	-67	8078	589.407	13.7053	0.54182	-62	8252	590	13.9864	12.9	144.34	-69		-69	8.63	13.4	1156.42	92.5136
2018-08-14	5043	589.416	8.55593	0.354567	-62	7256	592.202	12.2526	0.488685	-66	8653	591.984	14.6169	0.580388	-61	8448	590	14.3186	12.5	143.186	-68		-68	9.506	13.07	1242.43	99.3947
2018-08-15	5043	589.416	8.55593	0.354567	-61	7668	588.455	13.0307	0.516433	-65	8384	590.328	14.2023	0.562345	-60	8696	590	14.739	11.5	135.599	-67		-67	9.701	15.13	1467.76	117.421
2018-08-16	5208	589.367	8.8366	0.366167	-60	7812	590.804	13.2227	0.526131	-64	8695	589.12	14.7593	0.583205	-59	8814	590	14.939	11	131.463	-66		-66	10.351	15.17	1570.25	125.62
2018-08-17	5208	589.367	8.8366	0.366167	-59	8488	592.435	14.3273	0.571659	-63	8981	590.873	15.1995	0.602388	-58	8994	590	15.2441	10.9	132.928	-65		-65	10.611	16.43	1743.39	139.471
2018-08-18	5090.5	590.132	8.62604	0.357906	-58	8300	589.35	14.0833	0.558998	-62	8996	590.787	15.2271	0.603394	-57	9258	590	15.6915	13.2	165.703	-64		-64	11.211	15.97	1790.4	143.232
2018-08-19	5090.5	590.132	8.62604	0.357906	-57	8522	588.455	14.482	0.573949	-61	9167	587.969	15.591	0.614864	-56	8995	590	15.2458	14.2	173.192	-63		-63	11.814	15.87	1874.88	149.991
2018-08-20	5960.5	591.989	10.0686	0.419075	-56	8807	589.127	14.9492	0.593144	-60	9496	588.346	16.1402	0.636931	-55	9540	590	16.1695	15.4	199.208	-62		-62	12.115	16.53	2002.61	160.209
2018-08-21	5960.5	591.989	10.0686	0.419075	-55	9156	588	15.5714	0.616649	-59	9515	589.926	16.1291	0.638205	-54	10336	590	17.5186	14.6	204.618	-61		-61	12.552	15.83	1986.98	158.959
2018-08-22	6637	588.52	11.2774	0.466639	-54	9525	587.786	16.2049	0.641501	-58	9851	588.944	16.7266	0.660742	-53	10314	590	17.4814	15.4	215.37	-60		-60	12.663	15.87	2009.62	160.769
2018-08-23	6637	588.52	11.2774	0.466639	-53	9471	591.259	16.0184	0.637864	-57	10054	590.355	17.0304	0.674358	-52	10109	590	17.1339	15.7	215.202	-59		-59	13.056	16.17	2111.16	168.892
2018-08-24	7225	591.389	12.217	0.50798	-52	9750	590.072	16.5234	0.656654	-56	9726	589.787	16.4907	0.652358	-51	10166	590	17.2305	15.6	215.037	-58		-58	13.343	17.2	2295	183.6
2018-08-25	7225	591.389	12.217	0.50798	-51	9949	591.197	16.8286	0.670057	-55	10001	589.362	16.9692	0.670803	-50	10291	590	17.4424	15	209.308	-57		-57	13.291	18.77	2494.72	199.578
2018-08-26	7841	588.07	13.3334	0.55129	-50	9883	591.554	16.7068	0.665612	-54	9630	589.051	16.3483	0.645919	-49	10456	590	17.722	15.9	225.424	-56		-56	14.061	19.4	2727.83	218.227
2018-08-27	7824	592.281	13.21	0.550095	-49	9996	590.336	16.9327	0.673222	-53	10035	588.986	17.0378	0.673083	-48	10535	590	17.8559	18.2	259.982	-55		-55	14.346	21.03	3016.96	241.357
2018-08-28	8092	588.632	13.7471	0.568938	-48	10491	590.272	17.7732	0.70656	-52	10016	591.583	16.9309	0.671809	-47	10779	590	18.2695	18.7	273.312	-54		-54	14.704	21	3087.84	247.027
2018-08-29	8020	588.571	13.6262	0.563875	-47	10404	591.753	17.5817	0.7007	-51	10257	588.881	17.4178	0.687974	-46	11155	590	18.9068	20.4	308.559	-53		-53	14.979	20.2	3025.76	242.061
2018-08-30	8451	591.57	14.2857	0.594178	-46	11054	591.667	18.6828	0.744477	-50	10463	591.958	17.6752	0.701791	-45	10698	590	18.1322	19.2	278.511	-52		-52	15.674	18.6	2915.36	233.229
2018-08-31	8751	587.642	14.8917	0.615271	-45	10944	589.312	18.5708	0.737069	-49	10500	589.931	17.7987	0.704273	-44	11151	590	18.9	20.9	316.008	-51		-51	15.43	17.3	2669.39	213.551
2018-09-01	8344	589	14.1664	0.586655	-44	11411	589.682	19.3511	0.768521	-48	10829	590.748	18.331	0.72634	-43	11066	590	18.7559	19.5	292.593	-50		-50	16.328	18.27	2983.13	238.65
2018-09-02	8932	591.27	15.1065	0.627997	-43	11392	590.629	19.2879	0.767241	-47	10780	590.34	18.2607	0.723053	-42	11422	590	19.3593	20.4	315.944	-49		-49	16.043	19.87	3187.74	255.02
2018-09-03	8970	590.078	15.2014	0.630669	-42	11674	589.085	19.8172	0.786234	-46	10525	591.319	17.7992	0.705949	-41	11363	590	19.2593	19.6	301.986	-48		-48	16.712	22.3	3726.78	298.142
2018-09-04	9011	588.189	15.3199	0.633551	-41	9707	590.122	16.4491	0.653758	-45	10765	588.121	18.3041	0.722047	-40	11615	590	19.6864	17.8	280.335	-47		-47	16.615	22.17	3683.55	294.684
2018-09-05	8846	590.16	14.9892	0.62195	-40	11589	591.606	19.5891	0.780509	-44	11078	588.411	18.827	0.743041	-39	11604	590	19.6678	12.9	202.972	-46		-46	17.174	22.17	3807.48	304.598
2018-09-06	8986	589.37	15.2468	0.631794	-39	11683	591.605	19.748	0.78684	-43	11414	591.569	19.2945	0.765578	-38	11687	590	19.8085	9.6	152.129	-45		-45	16.339	22.7	3708.95	296.716
2018-09-07	9140	587.879	15.5474	0.642621	-38	11687	589.146	19.8372	0.787109	-42	11600	590.385	19.6482	0.778054	-37	11947	590	20.2492	11.1	179.812	-44		-44	17.185	23.17	3981.76	318.541
2018-09-08	9237	590.078	15.6539	0.649441	-37	12211	590.793	20.6688	0.8224	-41	11709	591.235	19.8043	0.785365	-36	11645	590	19.7373	14.3	225.795	-43		-43	17.728	21.27	3770.75	301.66
2018-09-09	10065	589.5	17.0738	0.707657	-36	11796	588.363	20.0489	0.79445	-40	11835	589.565	20.0741	0.793816	-35	11684	590	19.8034	12.8	202.787	-42		-42	17.766	19.83	3523	281.84
2018-09-10	9627	590.072	16.315	0.676861	-35	12050	589.102	20.4549	0.811557	-39	11909	588.242	20.2451	0.798779	-34	11701	590	19.8322	9.2	145.965	-41		-41	17.929	20.63	3698.75	295.9
2018-09-11	9766	588.058	16.6072	0.686634	-34	12082	589.123	20.5085	0.813712	-38	12381	590.12	20.9805	0.830438	-33	11731	590	19.8831	6.6	104.983	-40		-40	17.781	22.07	3924.27	313.941
2018-09-12	10191	590.634	17.2543	0.716516	-33	11757	591.453	19.8781	0.791824	-37	12127	591.024	20.5186	0.813401	-32	11655	590	19.7542	9	142.231	-39		-39	18.176	23.37	4247.73	339.818
2018-09-13	10219	590.28	17.3121	0.718484	-32	12087	588.563	20.5365	0.814049	-36	12106	589.405	20.5394	0.811993	-31	12185	590	20.6525	10.2	168.525	-38		-38	18.45	24.3	4483.35	358.668
2018-09-14	10531	588.562	17.8928	0.74042	-31	12604	591.429	21.3111	0.848869	-35	12355	588.706	20.9867	0.828694	-30	12013	590	20.361	11.3	184.064	-37		-37	18.393	25.27	4647.91	371.833
2018-09-15	9984	589.078	16.9485	0.701962	-30	12478	588.636	21.1981	0.840383	-34	12440	590.529	21.0658	0.834395	-29	12033	590	20.3949	9.4	153.37	-36		-36	19.138	26.2	5014.16	401.132
2018-09-16	10450	591.689	17.6613	0.734725	-29	12540	590.625	21.2317	0.844558	-33	12383	588.713	21.034	0.830572	-28	12199	590	20.6763	9.4	155.486	-35		-35	19.233	25.77	4956.34	396.508
2018-09-17	11106	591.533	18.7749	0.780848	-28	12954	590.169	21.9496	0.872441	-32	12456	591.486	21.0588	0.835469	-27	12245	590	20.7542	9.8	162.713	-34		-34	19.35	26.67	5160.65	412.852
2018-09-18	11221	589.43	19.037	0.788933	-27	13200	588.907	22.4144	0.889009	-31	12701	588.652	21.5764	0.851902	-26	12217	590	20.7068	11.3	187.189	-33		-33	19.822	26.57	5266.71	421.336
2018-09-19	11567	590.559	19.5865	0.81326	-26	13350	590.054	22.625	0.899111	-30	12925	588.833	21.9502	0.866926	-25	12487	590	21.1644	12.7	215.03	-32		-32	19.927	27.1	5400.22	432.017
2018-09-20	11308	590.637	19.1454	0.79505	-25	13698	589.841	23.2232	0.922548	-29	12956	588.778	22.0049	0.869005	-24	12850	590	21.7797	14.7	256.129	-31		-31	20.282	26.5	5374.73	429.978
2018-09-21	11806	588.82	20.0503	0.830064	-24	13580	591.031	22.9768	0.914601	-28	12936	588.611	21.9772	0.867664	-23	13162	590	22.3085	15.9	283.764	-30		-30	20.187	25.53	5153.74	412.299
2018-09-22	12187	591.361	20.6084	0.856852	-23	14126	591.495	23.8819	0.951374	-27	13211	589.396	22.4145	0.886109	-22	13294	590	22.5322	19.3	347.897	-29		-29	20.65	24.5	5059.25	404.74
2018-09-23	12036	590.24	20.3917	0.846235	-22	14067	589.652	23.8565	0.9474	-26	13485	590.914	22.8206	0.904487	-21	13269	590	22.4898	21.6	388.624	-28		-28	20.929	24.77	5184.11	414.729
2018-09-24	12398	591.579	20.9575	0.871687	-21	14617	589.158	24.81	0.984442	-25	13455	589.043	22.8422	0.902475	-20	13657	590	23.1475	25.1	464.801	-27		-27	21.326	23.77	5069.19	405.535
2018-09-25	12383	591.18	20.9462	0.870632	-20	14446	589.659	24.4989	0.972926	-24	13510	590.895	22.8636	0.906164	-19	13576	590	23.0102	25.5	469.407	-26		-26	21.673	23.27	5043.31	403.465
2018-09-26	12368	589.176	20.992	0.869577	-19	14132	590.094	23.9487	0.951778	-23	13367	590.428	22.6395	0.896573	-18	13364	590	22.6508	26.3	476.574	-25		-25	21.969	21.57	4738.71	379.097
2018-09-27	12006	591.42	20.3003	0.844126	-18	14410	590.446	24.4053	0.970501	-22	12465	591	21.0914	0.836072	-17	13681	590	23.1881	24.8	460.053	-24		-24	22.185	22.6	5013.81	401.105
2018-09-28	13157	589.005	22.3377	0.925051	-17	14423	590.143	24.4398	0.971377	-21	13257	591.23	22.4227	0.889194	-16	13712	590	23.2407	24	446.221	-23		-23	22.178	24.43	5418.09	433.447
2018-09-29	12817	591.271	21.677	0.901146	-16	13950	589.286	23.6727	0.93952	-20	13073	588.595	22.2105	0.876853	-15	13207	590	22.3847	22.3	399.344	-22		-22	22.404	27.17	6087.17	486.973
2018-09-30	12837	588.956	21.7962	0.902552	-15	14458	589.4	24.53	0.973734	-19	12870	590.914	21.7798	0.863237	-14	13496.5	590	22.8754	21.8	398.947	-21		-21	22.739	28.3	6435.14	514.811
2018-10-01	12584	588.38	21.3875	0.884764	-14	14263	589.61	24.1906	0.960601	-18	13625	588.737	23.1428	0.913878	-13	13786	590	23.3661	20.8	388.812	-20		-20	22.487	28.13	6325.59	506.047
2018-10-02	12599	590.4	21.3398	0.885819	-13	14171	590.197	24.0106	0.954405	-17	13509	589.421	22.9191	0.906097	-12	13813	590	23.4119	20.9	391.446	-19		-19	22.795	27.03	6161.49	492.919
2018-10-03	12324	589.429	20.9084	0.866484	-12	14178	590.1	24.0265	0.954876	-16	13710	589.179	23.2696	0.919579	-11	13404	590	22.7186	19.3	350.776	-18		-18	22.377	27.03	6048.5	483.88
2018-10-04	12502	589.86	21.1949	0.878999	-11	14151	591.095	23.9403	0.953058	-15	14072	590.761	23.8201	0.943859	-10	13579	590	23.0153	19.9	366.403	-17		-17	22.48	27.7	6226.96	498.157
2018-10-05	12680	591.503	21.4369	0.891514	-10	14134	590.443	23.9379	0.951913	-14	14387	590.446	24.3663	0.964988	-9	13052	590	22.122	23.4	414.124	-16		-16	22.709	28.27	6419.83	513.587
2018-10-06	12828	589.832	21.7486	0.901919	-9	14194	589.4	24.0821	0.955954	-13	14619	591.232	24.7264	0.980549	-8	14093	590	23.8864	28.1	536.967	-15		-15	22.649	26.7	6047.28	483.783
2018-10-07	13165.5	589.387	22.3376	0.925649	-8	13590	589.75	23.0437	0.915275	-12	14451	588.945	24.5371	0.96928	-7	13738	590	23.2847	28.4	529.029	-14		-14	22.368	24.03	5375.03	430.002
2018-10-08	13503	590.761	22.857	0.949378	-7	13902	589.356	23.5884	0.936288	-11	14748	589.242	25.0288	0.989201	-6	14047	590	23.8085	25.9	493.312	-13		-13	22.855	23.33	5332.07	426.566
2018-10-09	13175	589.222	22.36	0.926317	-6	14352	588.724	24.3781	0.966595	-10	14304	590.493	24.2238	0.95942	-5	13367	590	22.6559	24.8	449.494	-12		-12	22.29	23.27	5186.88	414.951
2018-10-10	13291	591.105	22.485	0.934472	-5	14446	588.78	24.5355	0.972926	-9	14843	590.145	25.1514	0.995573	-4	14016	590	23.7559	23.5	446.612	-11		-11	22.684	25.37	5754.93	460.394
2018-10-11	13427	589.465	22.7783	0.944034	-4	14212	590.796	24.0557	0.957166	-8	14655	589.758	24.8492	0.982963	-3	13445	590	22.7881	22.6	412.009	-10		-10	23.212	25.03	5809.96	464.797
2018-10-12	13781	589.684	23.3701	0.968924	-3	14117	590.55	23.9048	0.950768	-7	14587	589.175	24.7584	0.978402	-2	13949	590	23.6424	21.2	400.975	-9		-9	23.55	26.73	6294.91	503.593
2018-10-13	14087	590.051	23.8742	0.990438	-2	14236	590.443	24.1107	0.958782	-6	14766	590.622	25.0008	0.990408	-1	13632	590	23.1051	21.3	393.711	-8		-8	23.707	27.43	6502.83	520.226
2018-10-14	13964	589.447	23.69	0.98179	-1	14683	590.51	24.8649	0.988887	-5	14909	589.952	25.2715	1	0	13421	590	22.7475	19.5	354.86	-7		-7	23.766	29.2	6939.67	555.174
2018-10-15	14223	589.648	24.1212	1	0	14353	589.381	24.3527	0.966662	-4	14412	590.637	24.4008	0.966664	1	13548	590	22.9627	19	349.033	-6		-6	23.833	29.43	7014.05	561.124
2018-10-16	14011	590.444	23.7296	0.985095	1	14377	590.146	24.3618	0.968279	-3	14752	590.092	24.9995	0.989469	2	14212	590	24.0881	20.9	402.754	-5		-5	23.858	29.07	6935.52	554.842
2018-10-17	13799	589.206	23.4196	0.970189	2	14413	590.909	24.3912	0.970703	-2	14346	591.005	24.2739	0.962238	3	13724	590	23.261	22.1	411.255	-4		-4	24.094	29.13	7018.58	561.487
2018-10-18	13829	591.302	23.3874	0.972298	3	13929	591.159	23.5622	0.938106	-1	14537	590.529	24.6169	0.975049	4	13938	590	23.6237	24	453.576	-3		-3	24.194	29.07	7033.2	562.656
2018-10-19	13468	589.84	22.8333	0.946917	4	14848	588.693	25.222	1	0	14756	588.804	25.061	0.989738	5	13886	590	23.5356	24.1	453.766	-2		-2	24.341	28.1	6839.82	547.186
2018-10-20	13514	590.27	22.8946	0.950151	5	14153	590.381	23.9727	0.953192	1	14683	590.874	24.8496	0.984841	6	13433	590	22.7678	25.8	469.927	-1		-1	24.084	27.23	6558.07	524.646
2018-10-21	13855	588.802	23.5308	0.974126	6	13911	589.279	23.6068	0.936894	2	14262	590.583	24.149	0.956603	7	14360	590	24.339	24	467.308	0		0	24.872	27.07	6732.85	538.628
2018-10-22	13603	589.263	23.0848	0.956409	7	14713	589.31	24.9665	0.990908	3	14253	589.803	24.1657	0.956	8	13906	590	23.5695	22.7	428.022	1		1	24.034	27.93	6712.7	537.016
2018-10-23	13608	589.43	23.0867	0.95676	8	14660	588.857	24.8957	0.987338	4	14637	591.165	24.7596	0.981756	9	13968	590	23.6746	21.8	412.885	2		2	24.009	28	6722.52	537.802
2018-10-24	12978	589.624	22.0107	0.912466	9	14123	589.147	23.9719	0.951172	5	14515	589.757	24.6118	0.973573	10	13853	590	23.4797	24	450.809	3		3	24.209	27.97	6771.26	541.701
2018-10-25	12825	589.222	21.766	0.901709	10	14308	589.469	24.2727	0.963631	6	14063	589.01	23.8757	0.943256	11	13855	590	23.4831	26.1	490.326	4		4	24.115	28.93	6976.47	558.118
2018-10-26	12705	590.778	21.5055	0.893271	11	14628	589.289	24.8231	0.985183	7	14696	590.676	24.88	0.985713	12	13450	590	22.7966	27.5	501.525	5		5	23.976	30.87	7401.39	592.111
2018-10-27	13281	590.718	22.4828	0.933769	12	14498	590.048	24.5709	0.976428	8	13895	591.066	23.5084	0.931987	13	13838	590	23.4542		0	6		6	24.218	33.27	8057.33	644.586
2018-10-28	13219	591.209	22.3593	0.92941	13	14559	589.619	24.6922	0.980536	9	13686	589.794	23.2047	0.917969	14	13521	590	22.9169		0	7		7	24.019	33.1	7950.29	636.023
2018-10-29	13485	590.707	22.8286	0.948112	14	14444	591.274	24.4286	0.972791	10	13502	591.282	22.8351	0.905627	15	13553	590	22.9712	24.3	446.56	8		8	23.941	31.33	7500.72	600.057
2018-10-30	13307	589.457	22.575	0.935597	15	14379	588.852	24.4187	0.968413	11	14086	588.571	23.9325	0.944798	16	13651	590	23.1373	23	425.726	9		9	23.821	29.87	7115.33	569.227
2018-10-31	13265	591.141	22.4396	0.932644	16	13672	589.712	23.1842	0.920797	12	14498	589.444	24.596	0.972433	17	13167	590	22.3169	23.9	426.7	10		10	23.602	29.07	6861.1	548.888
2018-11-01	13441	589.686	22.7935	0.945019	17	13557	590.854	22.9447	0.913052	13	13540	590.737	22.9205	0.908176	18	12949	590	21.9475	26	456.507	11		11	23.267	30.4	7073.17	565.853
2018-11-02	13486	590.106	22.8535	0.948183	18	13997	591.307	23.6713	0.942686	14	13205	589.309	22.4076	0.885707	19	13347	590	22.622	26.4	477.777	12		12	23.516	30.4	7148.86	571.909
2018-11-03	13500	590.378	22.8667	0.949167	19	13950	590.854	23.6099	0.93952	15	14151	589.949	23.9868	0.949158	20	13325	590	22.5847	22.5	406.525	13		13	22.937	30.7	7041.66	563.333
2018-11-04	13270	590.549	22.4706	0.932996	20	14538	589.606	24.6571	0.979122	16	14118	589.333	23.9559	0.946945	21	12960	590	21.9661	20.6	362.001	14		14	23.235	29.57	6870.59	549.647
2018-11-05	13363	588.703	22.6991	0.939535	21	14233	589.272	24.1535	0.95858	17	14102	591.25	23.8512	0.945872	22	13163	590	22.3102	19.8	353.393	15		15	23.007	29.17	6711.14	536.891
2018-11-06	13174	590	22.3288	0.926246	22	14223	590.245	24.0968	0.957907	18	13705	590.313	23.2165	0.919243	23	12845	590	21.7712	21.2	369.239	16		16	23.676	28.53	6754.76	540.381
2018-11-07	13336	589.786	22.6116	0.937636	23	14274	588.932	24.2371	0.961342	19	14042	590.051	23.798	0.941847	24	12928	590	21.9119	21.9	383.896	17		17	23.848	27.73	6613.05	529.044
2018-11-08	12834	589.385	21.7752	0.902341	24	14056	591.225	23.7743	0.946659	20	13744	590.476	23.2761	0.921859	25	13385	590	22.6864	25.3	459.174	18		18	23.29	26.87	6258.02	500.642
2018-11-09	12561	591.13	21.2491	0.883147	25	14051	590.792	23.7833	0.946323	21	14091	589.794	23.8914	0.945134	26	13442	590	22.7831	29.4	535.857	19		19	23.17	26.93	6239.68	499.174
2018-11-10	12554	590.337	21.2658	0.882655	26	13658	589.158	23.1822	0.919855	22	12942	588.848	21.9785	0.868066	27	13462	590	22.8169	30.7	560.384	20		20	23.411	27.4	6414.61	513.169
2018-11-11	12652	589.943	21.4461	0.889545	27	13887	590.455	23.5192	0.935277	23	13736	590.515	23.261	0.921323	28	13083	590	22.1746	30.2	535.738	21		21	23.479	26.8	6292.37	503.39
2018-11-12	12986	588.681	22.0595	0.913028	28	14064	590.918	23.8002	0.947198	24	13269	589.626	22.5041	0.889999	29	13108	590	22.2169	27.1	481.663	22		22	23.121	26.67	6166.37	493.31
2018-11-13	12579	588.418	21.3777	0.884413	29	14106	589.01	23.9487	0.950027	25	13035	589.73	22.1033	0.874304	30	13521	590	22.9169	28.2	517.006	23		23	23.116	26.03	6017.09	481.368
2018-11-14	12548	590.114	21.2637	0.882233	30	13866	589.024	23.5406	0.933863	26	12968	591.374	21.9286	0.86981	31	12785	590	21.6695	26.3	455.926	24		24	23.124	25.9	5989.12	479.129
2018-11-15	13105	590.109	22.2078	0.921395	31	13845	589.447	23.4881	0.932449	27	12883	588.859	21.8779	0.864109	32	12883	590	21.8356	27.5	480.383	25		25	22.825	25.63	5850.05	468.004
2018-11-16	12385	589.532	21.0082	0.870773	32	13651	590.099	23.1334	0.919383	28	12700	590.335	21.5132	0.851834	33	13175	590	22.3305	25.2	450.183	26		26	22.899	24.8	5678.95	454.316
2018-11-17	11773	589.337	19.9767	0.827744	33	13336	590.202	22.5957	0.898168	29	12904	590.489	21.8531	0.865517	34	12521	590	21.222	27.5	466.885	27		27	22.304	25.57	5703.13	456.251
2018-11-18	12144	590.361	20.5704	0.853828	34	13666	590.104	23.1586	0.920393	30	12904	589.405	21.8933	0.865517	35	12351	590	20.9339	28.4	475.618	28		28	22.818	26.33	6007.98	480.638
2018-11-19	11911	588.678	20.2335	0.837446	35	13255	588.918	22.5074	0.892713	31	12973	589.309	22.0139	0.870146	36	12630	590	21.4068	28.1	481.224	29		29	22.159	28.4	6293.16	503.452
2018-11-20	12917	589.167	21.9242	0.908177	36	13088	589.275	22.2104	0.881466	32	12831	588.811	21.7914	0.860621	37	12340	590	20.9153	26.8	448.423	30		30	22.175	28.13	6237.83	499.026
2018-11-21	12437	591.477	21.027	0.874429	37	12533	589.326	21.2667	0.844087	33	12483	588.462	21.2129	0.837279	38	13031	590	22.0864	24	424.06	31		31	22.215	26.97	5991.39	479.311
2018-11-22	12414	590.682	21.0164	0.872812	38	13330	588.389	22.6551	0.897764	34	12776	589.626	21.668	0.856932	39	12317	590	20.8763	23.6	394.144	32		32	21.699	25.8	5598.34	447.867
2018-11-23	12616	591.143	21.3417	0.887014	39	13393	590.615	22.6763	0.902007	35	12621	590.824	21.3617	0.846536	40								33	20.919	25.4	5313.43	425.074
2018-11-24	11940	590.595	20.2169	0.839485	40	13888	591.333	23.4859	0.935345	36	12738	588.978	21.6273	0.854383	41								34	21.693	25.3	5488.33	439.066
2018-11-25	12171	590.174	20.6227	0.855727	41	13661	589.34	23.1802	0.920057	37	12464	589.503	21.1432	0.836005	42								35	21.601	24.7	5335.45	426.836
2018-11-26	12109	589.659	20.5356	0.851368	42	14014	589.179	23.7856	0.943831	38	11975	590	20.2966	0.803206	43								36	22.475	24.4	5483.9	438.712
2018-11-27	12420	590.345	21.0386	0.873233	43	13357	589.3	22.6659	0.899582	39	11872	591.552	20.0693	0.796298	44								37	22	24	5280	422.4
2018-11-28	11820	590.299	20.0237	0.831048	44	13575	588.542	23.0655	0.914265	40	11861	588.895	20.1411	0.79556	45								38	22.005	24.37	5362.62	429.009
2018-11-29	12622	589.27	21.4197	0.887436	45	13494	588.673	22.9227	0.908809	41	11723	590.171	19.8637	0.786304	46								39	21.892	25.67	5619.68	449.574
2018-11-30	12260	590.739	20.7537	0.861984	46	13322	591.309	22.5297	0.897225	42	11577	591.561	19.5703	0.776511	47								40	21.548	27.57	5940.78	475.263
2018-12-01	11737	589.701	19.9033	0.825213	47	12537	589.574	21.2645	0.844356	43	11619	589.598	19.7067	0.779328	48								41	21.724	27.83	6045.79	483.663
2018-12-02	11813	589.226	20.0483	0.830556	48	13297	589.777	22.5458	0.895541	44	11526	590.529	19.5181	0.77309	49								42	21.403	27.2	5821.62	465.729
2018-12-03	12785	588.833	21.7124	0.898896	49	13055	590.265	22.1172	0.879243	45	11410	590.422	19.3252	0.76531	50								43	20.867	28.33	5911.62	472.93
2018-12-04	9987	591.2	16.8928	0.702173	50	13111	588.802	22.2672	0.883015	46	11386	588.333	19.353	0.7637	51								44	20.88	28.6	5971.68	477.734
2018-12-05	11528	589.198	19.5656	0.810518	51	12802	590	21.6983	0.862204	47	11343	590.592	19.2062	0.760816	52								45	21.226	28.7	6091.86	487.349
2018-12-06	11837	589.76	20.0709	0.832244	52	12790	590.27	21.668	0.861395	48	11452	589.527	19.4258	0.768127	53								46	20.962	27.83	5833.72	466.698
2018-12-07	11982	590.592	20.2881	0.842438	53	13021	591.576	22.0107	0.876953	49	11596	590.119	19.6503	0.777785	54								47	20.391	28	5709.48	456.758
2018-12-08	11653	590.237	19.7429	0.819307	54	12895	589.415	21.8776	0.868467	50	11368	591.687	19.2129	0.762492	55								48	20.474	29.33	6005.02	480.402
2018-12-09	12210	589.884	20.699	0.858469	55	13374	589.894	22.6719	0.900727	51	11742	591.228	19.8604	0.787578	56								49	21.08	30.47	6423.08	513.846
2018-12-10	12313	590.343	20.8574	0.86571	56	12816	591.406	21.6704	0.863147	52	11737	588.882	19.931	0.787243	57								50	19.365	29.9	5790.13	463.211
2018-12-11	11598	588.364	19.7123	0.81544	57	12986	589.791	22.018	0.874596	53	11586	588.876	19.6748	0.777114	58								51	20.53	29.3	6015.29	481.223
2018-12-12	12444	590.914	21.0589	0.874921	58	12902	589.115	21.9007	0.868939	54	11064	590.976	18.7216	0.742102	59								52	20.316	28.33	5755.52	460.442
2018-12-13	11881	589.112	20.1676	0.835337	59	13075	588.646	22.212	0.88059	55	11640	591.657	19.6736	0.780736	60								53	20.577	28.17	5796.54	463.723
2018-12-14	11210	588.562	19.0464	0.78816	60	12955	589.418	21.9793	0.872508	56	11486	588.631	19.5131	0.770407	61								54	20.431	27.13	5542.93	443.434
2018-12-15	11030	590.062	18.6929	0.775504	61	12741	590.963	21.5597	0.858095	57	11507	589.048	19.5349	0.771816	62								55	20.708	26.13	5411	432.88
2018-12-16	11277	588.889	19.1496	0.792871	62	12731	589.016	21.614	0.857422	58	11342	589.091	19.2534	0.760749	63								56	20.899	25.67	5364.77	429.182
2018-12-17	11504	590.062	19.4963	0.808831	63	13074	590.432	22.1431	0.880523	59	11787	589.364	19.9995	0.790596	64								57	20.401	26.23	5351.18	428.095
2018-12-18	11355	589	19.2784	0.798355	64	12716	591.129	21.5114	0.856412	60	12008	589.306	20.3765	0.80542	65								58	20.783	27.87	5792.22	463.378
2018-12-19	11689	590.12	19.8078	0.821838	65	12773	590.87	21.6173	0.860251	61	11767	591.047	19.9088	0.789255	66								59	20.344	29.57	6015.72	481.258
2018-12-20	11394	591.062	19.2771	0.801097	66	12607	588.947	21.406	0.849071	62	12237	589.545	20.7567	0.820779	67								60	20.077	30.07	6037.15	482.972
2018-12-21	11442	588.841	19.4314	0.804472	67	12811	591.211	21.6691	0.86281	63	12387	588.708	21.041	0.83084	68								61	19.941	29.87	5956.38	476.51
2018-12-22	11596	588.344	19.7096	0.815299	68	12645	589.048	21.4669	0.85163	64	12029	589.086	20.4198	0.806828	69								62	20.03	29	5808.7	464.696
2018-12-23	10759	589.29	18.2576	0.756451	69	12677	589.427	21.5073	0.853785	65	12011	590.058	20.3556	0.805621	70								63	20.14	28.43	5725.8	458.064
2018-12-24	11425	591.118	19.3278	0.803276	70	12832	590	21.7492	0.864224	66	11956	591.512	20.2126	0.801932	71								64	20.248	27.77	5622.87	449.83
2018-12-25	11840	589.24	20.0937	0.832454	71	12434	588.77	21.1186	0.837419	67	11143	588.589	18.9317	0.747401	72								65	20.564	27.5	5655.1	452.408
2018-12-26	11230	588.405	19.0855	0.789566	72	13357	591.148	22.595	0.899582	68	11484	591.235	19.4238	0.770273	73								66	20.312	26.8	5443.62	435.489
2018-12-27	11320	591.835	19.1269	0.795894	73	12499	590.96	21.1503	0.841797	69	11326	591.25	19.156	0.759675	74								67	20.436	25.93	5299.05	423.924
2018-12-28	11161	588.75	18.9571	0.784715	74	12392	589.838	21.0092	0.834591	70	12033	588.757	20.438	0.807096	75								68	21.115	26.23	5538.46	443.077
2018-12-29	11439	589.875	19.3922	0.804261	75	12234	590.166	20.7298	0.823949	71	11354	591.31	19.2014	0.761553	76								69	19.943	27.2	5424.5	433.96
2018-12-30	11317	589.188	19.2078	0.795683	76	12102	590.273	20.5024	0.815059	72	12159	590.497	20.5911	0.815548	77								70	20.231	28.5	5765.84	461.267
2018-12-31	11345	590.184	19.2228	0.797652	77	12384	589.293	21.015	0.834052	73	12148	589.489	20.6077	0.81481	78								71	20.345	28.63	5824.77	465.982
2019-01-01	11619	591.728	19.6357	0.816916	78	12713	590.591	21.5259	0.85621	74	11894	591.322	20.1143	0.797773	79								72	19.507	28.37	5534.14	442.731
2019-01-02	10873	591.579	18.3796	0.764466	79	12617	590.319	21.3732	0.849744	75	11769	590.462	19.9318	0.789389	80								73	19.855	27	5360.85	428.868
2019-01-03	11469	589.938	19.441	0.80637	80	12450	591.297	21.0554	0.838497	76	11255	589.701	19.086	0.754913	81								74	19.88	26.03	5174.76	413.981
2019-01-04	10567	589.416	17.9279	0.742952	81	12400	589.348	21.0402	0.835129	77	11342	591.369	19.1792	0.760749	82								75	20.401	25.07	5114.53	409.162
2019-01-05	11774	590.848	19.9273	0.827814	82	12196	591.243	20.6277	0.82139	78	11575	588.393	19.6722	0.776377	83								76	19.822	25.3	5014.97	401.197
2019-01-06	11318	588.951	19.2172	0.795753	83	12201	590.909	20.6478	0.821727	79	11234	600.494	18.7079	0.753505	84								77	20.285	25.57	5186.87	414.95
2019-01-07	11148	590.125	18.8909	0.783801	84	12908	591.568	21.82	0.869343	80	11357	600.182	18.9226	0.761755	85								78	20.29	26.93	5464.1	437.128
2019-01-08	10854	590.382	18.3847	0.76313	85	12912	588.639	21.9354	0.869612	81	11362	599.268	18.9598	0.76209	86								79	19.714	27.47	5415.44	433.235
2019-01-09	11204	589.08	19.0195	0.787738	86	12501	590.838	21.1581	0.841932	82	11320	598.242	18.9221	0.759273	87								80	20.398	27.8	5670.64	453.652
2019-01-10	10413	590.537	17.6331	0.732124	87	12491	588.457	21.2267	0.841258	83	11160	598.405	18.6496	0.748541	88								81	19.65	28.07	5515.75	441.26
2019-01-11	10804	588.553	18.3569	0.759615	88	12620	591.25	21.3446	0.849946	84	11810	601.579	19.6317	0.792139	89								82	20.088	29.07	5839.58	467.167
2019-01-12	10062	588.562	17.0959	0.707446	89	12313	589.362	20.8921	0.82927	85	11915	598.457	19.9095	0.799182	90								83	20.039	30.03	6017.71	481.417
2019-01-13	9456	589.643	16.0368	0.664839	90	12227	590.378	20.7104	0.823478	86	11530	600.536	19.1995	0.773358	91								84	19.648	30.57	6006.39	480.511
2019-01-14	9790	590.139	16.5893	0.688322	91	11783	591.209	19.9304	0.793575	87	11431	598.263	19.107	0.766718	92								85	19.4	24.92	4834.48	386.758
2019-01-15	9752	589.048	16.5555	0.68565	92	11519	588.475	19.5743	0.775795	88	10978	601.75	18.2435	0.736334	93								86	19.563	25.62	5012.04	400.963
2019-01-16	9759	591.486	16.4991	0.686142	93	10031	590.117	16.9983	0.675579	89	10922	601.72	18.1513	0.732578	94								87	18.829	31.97	6019.63	481.571
2019-01-17	10830	590.19	18.35	0.761443	94	11633	590.719	19.693	0.783473	90	10997	601.019	18.2973	0.737608	95								88	18.86	32.8	6186.08	494.886
2019-01-18	10588	588.354	17.996	0.744428	95	10999	589.286	18.665	0.740773	91	11321	601.375	18.8252	0.75934	96								89	17.909	32.83	5879.52	470.362
2019-01-19	10513	590	17.8186	0.739155	96	11228	590.296	19.021	0.756196	92	11632	600.888	19.358	0.7802	97								90	18.546	32.2	5971.81	477.745
2019-01-20	10280	588.994	17.4535	0.722773	97	10857	590.116	18.3981	0.73121	93	11414	601.497	18.976	0.765578	98								91	18.151	32.5	5899.08	471.926
2019-01-21	10184	588.846	17.2948	0.716023	98	10602	588.242	18.0232	0.714036	94	11447	600.976	19.0474	0.767791	99								92	18.228	32.13	5856.66	468.533
2019-01-22	10227	588.354	17.3824	0.719047	99	10683	588.696	18.1469	0.719491	95	11361	600.536	18.9181	0.762023	100								93	17.714	33.27	5893.45	471.476
2019-01-23	10240	589.308	17.3763	0.719961	100	10298	589.562	17.4672	0.693561	96	11521	600.714	19.1788	0.772755	101								94	18.175	33.27	6046.82	483.746
2019-01-24	10678	590.549	18.0815	0.750756	101	10027	589.091	17.0211	0.67531	97	11504	599.704	19.1828	0.771614	102								95	18.147	34.2	6206.27	496.502
2019-01-25	10317	591.582	17.4397	0.725374	102	10088	591.053	17.0679	0.679418	98	11377	598.373	19.0132	0.763096	103								96	18.037	35.57	6415.76	513.261
2019-01-26	9599	588.552	16.3095	0.674893	103	9654	589.342	16.381	0.650189	99	11056	598.519	18.4723	0.741565	104								97	17.944	38.17	6849.22	547.938
2019-01-27	9692	588.207	16.4772	0.681431	104	10008	591.781	16.9117	0.67403	100	10896	599.937	18.1619	0.730834	105								98	17.78	39.27	6982.21	558.576
2019-01-28	9652	591.259	16.3245	0.678619	105	9707	591.854	16.401	0.653758	101	10234	598.411	17.102	0.686431	106								99	17.604	40.7	7164.83	573.186
2019-01-29	9381	590.78	15.879	0.659565	106	9573	589.793	16.2311	0.644733	102	10330	600.196	17.211	0.69287	107								100	17.735	40.4	7164.94	573.195
2019-01-30	9886	591.655	16.7091	0.695071	107	9572	591.517	16.1821	0.644666	103	9987	598.553	16.6852	0.669864	108								101	17.887	41.03	7339.04	587.123
2019-01-31	9912	591.301	16.763	0.696899	108	9676	590.828	16.377	0.65167	104	10079	598.896	16.8293	0.676035	109								102	17.618	41.53	7316.76	585.34
2019-02-01	10593	588.344	18.0048	0.74478	109	9309	591.689	15.7329	0.626953	105	10340	600.387	17.2222	0.693541	110								103	17.168	42.5	7296.4	583.712
2019-02-02	9917	590.903	16.7828	0.697251	110	9314	590	15.7864	0.62729	106	10227	599.742	17.0523	0.685961	111								104	17.109	42.53	7276.46	582.117
2019-02-03	9494	588.38	16.1358	0.66751	111	9388	590.915	15.8872	0.632274	107	10323	598.981	17.2343	0.692401	112								105	16.74	42.33	7086.04	566.883
2019-02-04	9738	589.72	16.5129	0.684666	112	9265	590.483	15.6906	0.62399	108	10086	601.126	16.7785	0.676504	113								106	16.256	41.17	6692.6	535.408
2019-02-05	9553	590.559	16.1762	0.671659	113	9593	588.288	16.3066	0.64608	109	9512	600.685	15.8353	0.638004	114								107	16.602	40.53	6728.79	538.303
2019-02-06	9493	587.986	16.1449	0.66744	114	9062	588.456	15.3996	0.610318	110	9747	600.897	16.2208	0.653766	115								108	16.38	36.63	5999.99	480
2019-02-07	9536	588.31	16.2091	0.670463	115	8996	590.352	15.2384	0.605873	111	10009	598.533	16.7225	0.671339	116								109	17.047	34.17	5824.96	465.997
2019-02-08	9464	590.638	16.0233	0.665401	116	8776	589.214	14.8944	0.591056	112	9865	598.69	16.4777	0.661681	117								110	16.468	32.5	5352.1	428.168
2019-02-09	9116	591.583	15.4095	0.640934	117	9031	590.075	15.3048	0.60823	113	9847	600.493	16.3982	0.660474	118								111	16.142	32.77	5289.73	423.179
2019-02-10	9567	588.169	16.2657	0.672643	118	8301	591.079	14.0438	0.559065	114	10044	599.346	16.7583	0.673687	119								112	16.214	33.2	5383.05	430.644
2019-02-11	9277	589.504	15.737	0.652253	119	8058	588.092	13.7019	0.542699	115	9877	600.676	16.4431	0.662486	120								113	16.087	32.8	5276.54	422.123
2019-02-12	9564	590.417	16.1987	0.672432	120	8287	588.56	14.0801	0.558122	116	9922	600.667	16.5183	0.665504	121								114	15.341	33.67	5165.31	413.225
2019-02-13	9367	590.414	15.8651	0.658581	121	8489	589.545	14.3992	0.571727	117	9680	600.405	16.1224	0.649272	122								115	15.377	34.87	5361.96	428.957
2019-02-14	9049	589.493	15.3505	0.636223	122	8524	589.927	14.4492	0.574084	118	9595	601.301	15.9571	0.643571	123								116	15.609	35.77	5583.34	446.667
2019-02-15	9353	589.645	15.8621	0.657597	123	9003	590.963	15.2345	0.606344	119	9966	599.934	16.6118	0.668455	124								117	15.429	40.81	6296.57	503.726
2019-02-16	9344	589.034	15.8632	0.656964	124	8657	591.643	14.6321	0.583041	120	9663	600.204	16.0995	0.648132	125								118	15.704	40.61	6377.39	510.192
2019-02-17	9191	589.22	15.5986	0.646207	125	8480	590.735	14.355	0.571121	121	9095	601.944	15.1094	0.610034	126								119	15.91	39.61	6301.95	504.156
2019-02-18	8882	589.565	15.0653	0.624481	126	8231	590.441	13.9404	0.554351	122	9030	599.214	15.0697	0.605674	127								120	15.758	34.97	5510.57	440.846
2019-02-19	8672	592.164	14.6446	0.609717	127	8102	588.571	13.7655	0.545663	123	9411	601.944	15.6343	0.631229	128								121	15.579	37.43	5831.22	466.498
2019-02-20	8764	590.438	14.8432	0.616185	128	7990	589.389	13.5564	0.53812	124	9665	600.479	16.0955	0.648266	129								122	15.138	36.87	5581.38	446.51
2019-02-21	9148	588.071	15.5559	0.643184	129	7831	591.846	13.2315	0.527411	125	9854	601.141	16.3922	0.660943	130								123	15.195	37.27	5663.18	453.054
2019-02-22	8568	589.552	14.5331	0.602405	130	7977	587.955	13.5674	0.537244	126	9794	601.486	16.283	0.656919	131								124	15.344	38.1	5846.06	467.685
2019-02-23	8912	590.73	15.0864	0.626591	131	7772	591.119	13.1479	0.523438	127	9663	598.716	16.1395	0.648132	132								125	14.977	38.4	5751.17	460.093
2019-02-24	8860	590	15.0169	0.622935	132	7734	592.137	13.0612	0.520878	128	10106	600.455	16.8306	0.677846	133								126	14.581	37.37	5448.92	435.914
2019-02-25	8965	588.671	15.2292	0.630317	133	7672	590.373	12.9952	0.516703	129	8779	600.075	14.6298	0.588839	134								127	14.287	35.07	5010.45	400.836
2019-02-26	9129	590.476	15.4604	0.641848	134	8206	591.667	13.8693	0.552667	130	8788	598.134	14.6924	0.589443	135								128	14.513	34.23	4967.8	397.424
2019-02-27	8765	589.437	14.8701	0.616255	135	8130	588.759	13.8087	0.547548	131	8586	599.692	14.3173	0.575894	136								129	14.882	34.87	5189.35	415.148
2019-02-28	8533	589.281	14.4804	0.599944	136	8361	589.776	14.1766	0.563106	132	8184	600.4	13.6309	0.54893	137								130	14.932	35.4	5285.93	422.874
2019-03-01	8363	591.729	14.1332	0.587991	137	8017	589.489	13.5999	0.539938	133	8451	601.923	14.04	0.566839	138								131	15.059	35.2	5300.77	424.061
2019-03-02	8102	591.221	13.7038	0.569641	138	8181	589.389	13.8805	0.550983	134	8530	598.409	14.2545	0.572138	139								132	15.111	34.53	5217.83	417.426
2019-03-03	8452	590.368	14.3165	0.594249	139	8084	589.275	13.7185	0.54445	135	8507	602	14.1312	0.570595	140								133	15.22	34.07	5185.45	414.836
2019-03-04	8065	591.045	13.6453	0.567039	140	7756	589.706	13.1523	0.52236	136	8510	601.527	14.1473	0.570796	141								134	14.657	34.3	5027.35	402.188
2019-03-05	8008	590.31	13.5658	0.563032	141	7808	589.924	13.2356	0.525862	137	8446	600.833	14.0571	0.566503	142								135	14.427	34.63	4996.07	399.686
2019-03-06	8251	588.593	14.0182	0.580117	142	7974	590.687	13.4995	0.537042	138	8351	599.023	13.941	0.560131	143								136	13.983	35.43	4954.18	396.334
2019-03-07	8219	588.947	13.9554	0.577867	143	7928	591.852	13.3952	0.533944	139	8364	598.582	13.973	0.561003	144								137	13.667	35.57	4861.35	388.908
2019-03-08	8038	588.837	13.6506	0.565141	144	7950	587.956	13.5214	0.535426	140	8189	598.421	13.6843	0.549266	145								138	13.748	35.7	4908.04	392.643
2019-03-09	7757	590.738	13.131	0.545384	145	7731	590.507	13.0921	0.520676	141	8681	600.922	14.4461	0.582266	146								139	13.989	34.7	4854.18	388.335
2019-03-10	7858	590.853	13.2994	0.552485	146	7868	589.398	13.3492	0.529903	142	8453	599.64	14.0968	0.566973	147								140	13.766	33.7	4639.14	371.131
2019-03-11	7939	587.863	13.5049	0.55818	147	7712	588.897	13.0957	0.519397	143	8468	601.471	14.0788	0.567979	148								141	13.602	32.77	4457.38	356.59
2019-03-12	7886	591.429	13.3338	0.554454	148	7790	588.015	13.248	0.52465	144	8495	600.714	14.1415	0.56979	149								142	13.808	32.7	4515.22	361.217
2019-03-13	7703	590.32	13.0489	0.541588	149	7746	591.791	13.0891	0.521686	145	8498	599.854	14.1668	0.569991	150								143	13.664	31.87	4354.72	348.377
2019-03-14	7681	588.25	13.0574	0.540041	150	7476	589.03	12.6921	0.503502	146	8227	600.074	13.71	0.551814	151								144	13.624	31.3	4264.31	341.145
2019-03-15	7644	587.68	13.0071	0.537439	151	7197	588.397	12.2315	0.484712	147	8410	599.781	14.0218	0.564089	152								145	13.301	31.87	4239.03	339.122
2019-03-16	7962	588.889	13.5204	0.559798	152	7589	588.74	12.8902	0.511113	148	8476	599.63	14.1354	0.568516	153								146	13.479	32.27	4349.67	347.974
2019-03-17	7785	590.48	13.1842	0.547353	153	7435	590.84	12.5838	0.500741	149	8374	601.618	13.9191	0.561674	154								147	13.278	32.2	4275.52	342.041
2019-03-18	7799	587.68	13.2708	0.548337	154	7403	588.55	12.5784	0.498586	150	8645	599.489	14.4206	0.579851	155								148	13.434	32.8	4406.35	352.508
2019-03-19	7846	589.431	13.3111	0.551642	155	7107	588.846	12.0694	0.47865	151	8393	601.103	13.9627	0.562949	156								149	13.258	33.1	4388.4	351.072
2019-03-20	7295	588.621	12.3934	0.512902	156	7496	591.298	12.6772	0.504849	152	8660	599.507	14.4452	0.580857	157								150	13.268	32.43	4302.81	344.225
2019-03-21	7636	587.967	12.9871	0.536877	157	6873	591.679	11.6161	0.462891	153	8457	599.786	14.1	0.567241	158								151	12.929	29.87	3861.89	308.951
2019-03-22	7586	590.894	12.8382	0.533361	158	7186	591.68	12.1451	0.483971	154	8316	599.565	13.8701	0.557784	159								152	13.406	28.63	3838.14	307.051
2019-03-23	7584	588.115	12.8954	0.533221	159	7155	588.359	12.1609	0.481883	155	8108	599.47	13.5253	0.543833	160								153	12.979	27.23	3534.18	282.735
2019-03-24	7558	589.008	12.8317	0.531393	160	7164	588.74	12.1684	0.482489	156	8375	599.124	13.9787	0.561741	161								154	13.112	27.27	3575.64	286.051
2019-03-25	7261	587.826	12.3523	0.510511	161	7040	590.238	11.9274	0.474138	157	8400	599.185	14.019	0.563418	162								155	13.298	26.33	3501.36	280.109
2019-03-26	7136	588.174	12.1325	0.501723	162	7103	591.22	12.0142	0.478381	158	7412	599.167	12.3705	0.497149	163								156	12.841	26.63	3419.56	273.565
2019-03-27	7212	587.5	12.2757	0.507066	163	7313	590.853	12.377	0.492524	159	7840	597.744	13.116	0.525857	164								157	13.12	25.37	3328.54	266.284
2019-03-28	7447	588.443	12.6554	0.523589	164	7313	590.606	12.3822	0.492524	160	7155	598.718	11.9505	0.479911	165								158	12.984	25.97	3371.94	269.756
2019-03-29	7443	587.899	12.6603	0.523307	165	7309.5	590.606	12.3763	0.492289	161	7812	600.394	13.0115	0.523979	166								159	13.048	27.63	3605.16	288.413
2019-03-30	7538	588.099	12.8176	0.529987	166	7309.5	589.808	12.393	0.492289	162	7621	600.569	12.6896	0.511168	167								160	12.913	27.87	3598.85	287.908
2019-03-31	7657	588.254	13.0165	0.538353	167	7039	589.808	11.9344	0.474071	163	7523	599.528	12.5482	0.504595	168								161	12.902	27.93	3603.53	288.282
2019-04-01	7698	588.333	13.0844	0.541236	168	7039	588.622	11.9584	0.474071	164	7648	600.24	12.7416	0.512979	169								162	12.848	27.1	3481.81	278.545
2019-04-02	7652	590.873	12.9503	0.538002	169	7532	588.622	12.796	0.507274	165	7493	599.444	12.4999	0.502582	170								163	12.194	27.63	3369.2	269.536
2019-04-03	7632	592.24	12.8867	0.536596	170	7532	589.549	12.7759	0.507274	166	7658	601.318	12.7354	0.513649	171								164	12.577	27.23	3424.72	273.977
2019-04-04	7871	590	13.3407	0.553399	171	7891	589.549	13.3848	0.531452	167	7927	601.136	13.1867	0.531692	172								165	12.469	26.17	3263.14	261.051
2019-04-05	7878	589.627	13.361	0.553892	172	7891	589.82	13.3787	0.531452	168	7482	602.047	12.4276	0.501845	173								166	12.868	24.33	3130.78	250.463
2019-04-06	7582	590.472	12.8406	0.53308	173	7593	589.82	12.8734	0.511382	169	7798	598.661	13.0257	0.52304	174								167	13.03	22.9	2983.87	238.71
2019-04-07	7820	589.403	13.2677	0.549814	174	8051	591.63	13.6082	0.542228	170	7776	600.709	12.9447	0.521564	175								168	13.004	24.1	3133.96	250.717
2019-04-08	7416	588.14	12.6093	0.521409	175	8031	588.75	13.6408	0.540881	171	7893	599.308	13.1702	0.529412	176								169	12.855	25.17	3235.6	258.848
2019-04-09	7155	592.114	12.0838	0.503058	176	7964	591.958	13.4537	0.536369	172	7803	598.837	13.0303	0.523375	177								170	12.998	26.13	3396.38	271.71
2019-04-10	6911	587.731	11.7588	0.485903	177	8150	588.214	13.8555	0.548895	173	7947	600.923	13.2247	0.533034	178								171	13.239	25.43	3366.68	269.334
2019-04-11	7011	588.678	11.9097	0.492934	178	8309	591.049	14.0581	0.559604	174	7928	598.923	13.2371	0.531759	179								172	13.334	24.93	3324.17	265.933
2019-04-12	7465	591.953	12.6108	0.524854	179	7916	590.828	13.3982	0.533136	175	8044	601.085	13.3825	0.53954	180								173	13.041	24.77	3230.26	258.42
2019-04-13	7339	591.811	12.4009	0.515995	180	8035	588.936	13.6432	0.54115	176	7754	600.157	12.9199	0.520089	181								174	13.45	24.83	3339.63	267.171
2019-04-14	7308	589.766	12.3914	0.513816	181	8177	590.571	13.8459	0.550714	177	7995	601.484	13.2921	0.536253	182								175	12.984	24.9	3233.02	258.641
2019-04-15	7384	591.24	12.489	0.519159	182	8251	590.556	13.9716	0.555698	178	7398	602.437	12.2801	0.49621	183								176	12.966	24.63	3193.53	255.482
2019-04-16	7497	591.88	12.6664	0.527104	183	7948	590.208	13.4664	0.535291	179	7969	600.992	13.2597	0.534509	184								177	12.878	25.1	3232.38	258.59
2019-04-17	7299	588.397	12.4049	0.513183	184	8012	588.511	13.614	0.539601	180	7750	599.213	12.9336	0.51982	185								178	13.035	24.73	3223.56	257.884
2019-04-18	7207	588.08	12.2551	0.506714	185	8260	590.141	13.9967	0.556304	181	7763	602.047	12.8943	0.520692	186								179	13.105	26.83	3516.07	281.286
2019-04-19	7167	587.969	12.1894	0.503902	186	8087	591.31	13.6764	0.544652	182	7394	600.484	12.3134	0.495942	187								180	13.132	25.57	3357.85	268.628
2019-04-20	7444	589.847	12.6202	0.523378	187	7928	591.69	13.3989	0.533944	183	7708	599.606	12.8551	0.517003	188								181	13.103	27.03	3541.74	283.339
2019-04-21	7177	587.717	12.2117	0.504605	188	8184	588.357	13.9099	0.551185	184	7772	598.295	12.9903	0.521296	189								182	13.153	25.67	3376.38	270.11
2019-04-22	6914	591.484	11.6892	0.486114	189	8039	589.51	13.6367	0.54142	185	7948	599.457	13.2587	0.533101	190								183	12.782	26	3323.32	265.866
2019-04-23	6571	589.748	11.142	0.461998	190	8130	589.928	13.7813	0.547548	186	7484	598.72	12.5	0.501979	191								184	13.192	25.63	3381.11	270.489
2019-04-24	6761	590.579	11.4481	0.475357	191	8069	590.282	13.6697	0.54344	187	7945	600.234	13.2365	0.5329	192								185	12.942	25.13	3252.32	260.186
2019-04-25	6311	591.892	10.6624	0.443718	192	7831	591.135	13.2474	0.527411	188	7836	599.535	13.0701	0.525589	193								186	12.955	23.23	3009.45	240.756
2019-04-26	7016	588.291	11.9261	0.493286	193	8094	590.221	13.7135	0.545124	189	7915	599.015	13.2134	0.530887	194								187	12.868	21.5	2766.62	221.33
2019-04-27	7284	589.758	12.3508	0.512128	194	8256	589.143	14.0136	0.556034	190	7424	601.04	12.3519	0.497954	195								188	12.771	22.83	2915.62	233.25
2019-04-28	6594	591.15	11.1545	0.463615	195	7959	589.931	13.4914	0.536032	191	7802	602.137	12.9572	0.523308	196								189	12.798	23.6	3020.33	241.626
2019-04-29	6527	592.544	11.0152	0.458905	196	7783	588.841	13.2175	0.524178	192	7582	597.734	12.6846	0.508552	197								190	12.805	24.8	3175.64	254.051
2019-04-30	6420	587.982	10.9187	0.451382	197	7630	588.358	12.9683	0.513874	193	7515	601.811	12.4873	0.504058	198								191	12.48	22.87	2854.18	228.334
2019-05-01	6375	589.573	10.8129	0.448218	198	7676	589.389	13.0236	0.516972	194	8069	602.164	13.4	0.541217	199								192	12.372	21.9	2709.47	216.757
2019-05-02	4736	591.724	8.00373	0.332982	199	7643	589.323	12.9691	0.514749	195	7483	602.258	12.4249	0.501912	200								193	12.655	20.67	2615.79	209.263
2019-05-03	5242	592.396	8.84881	0.368558	200	7497	588.421	12.7409	0.504916	196	7285	598.268	12.1768	0.488631	201								194	12.863	19.13	2460.69	196.855
2019-05-04	5134	591.183	8.68429	0.360965	201	7798	591.818	13.1763	0.525189	197	7627	600.769	12.6954	0.51157	202								195	12.159	20.13	2447.61	195.809
2019-05-05	4945	587.303	8.41984	0.347676	202	7987	589.774	13.5425	0.537918	198	7495	599.618	12.4996	0.502716	203								196	12.238	19.77	2419.45	193.556
2019-05-06	5508	587.7	9.37213	0.38726	203	7311	588.043	12.4328	0.49239	199	9124	599.61	15.2165	0.611979	204								197	12.26	20.73	2541.5	203.32
2019-05-07	5361	587.449	9.1259	0.376925	204	7263	591.615	12.2766	0.489157	200	8080	598.658	13.4969	0.541955	205								198	12.281	20.3	2493.04	199.443
2019-05-08	5286	587.5	8.99745	0.371652	205	7317	589.389	12.4145	0.492794	201	5652	601.474	9.39692	0.3791	206								199	11.279	20.7	2334.75	186.78
2019-05-09	5449	592.577	9.19542	0.383112	206	7353	589.237	12.4789	0.495218	202	6183	602.056	10.2698	0.414716	207								200	11.183	22.43	2508.35	200.668
2019-05-10	5595	590	9.48305	0.393377	207	7329	591.077	12.3994	0.493602	203	8416	599.419	14.0403	0.564491	208								201	11.092	23.9	2650.99	212.079
2019-05-11	5784	588.119	9.83475	0.406665	208	7710	589.692	13.0746	0.519262	204	5554	603.152	9.20829	0.372527	209								202	11.198	26.4	2956.27	236.502
2019-05-12	5192	587.849	8.83219	0.365043	209	7695	591.111	13.0179	0.518252	205	7798	599.504	13.0074	0.52304	210								203	11.424	24.23	2768.04	221.443
2019-05-13	5556	589.688	9.42194	0.390635	210	7613	591.418	12.8725	0.512729	206	5408	597.742	9.04738	0.362734	211								204	12.472	22.83	2847.36	227.789
2019-05-14	4835	593.258	8.14991	0.339942	211	7501	588.148	12.7536	0.505186	207	7584	601.338	12.6119	0.508686	212								205	11.837	22.67	2683.45	214.676
2019-05-15	5356.5	590.316	9.07396	0.376608	212	7565	589.318	12.8369	0.509496	208	4883	598.916	8.15307	0.32752	213								206	10.488	23.93	2509.78	200.782
2019-05-16	5356.5	590.316	9.07396	0.376608	213	7097	591.298	12.0024	0.477977	209	6026	599.615	10.0498	0.404185	214								207	10.835	24.63	2668.66	213.493
2019-05-17	5664.5	589.755	9.60484	0.398263	214	7229	590.081	12.2509	0.486867	210	4410	598.795	7.36479	0.295794	215								208	12.237	22.73	2781.47	222.518
2019-05-18	5664.5	589.755	9.60484	0.398263	215	6135	589.206	10.4123	0.413187	211	4004	596.538	6.71206	0.268563	216								209	10.014	21.77	2180.05	174.404
2019-05-19	4950.5	592.967	8.34869	0.348063	216	5639	591.852	9.52772	0.379782	212	3871	602.785	6.42186	0.259642	217								210	11.56	21.4	2473.84	197.907
2019-05-20	4950.5	592.967	8.34869	0.348063	217	5730	591.776	9.68272	0.385911	213	3474	603.194	5.75934	0.233014	218								211	9.203	25.4	2337.56	187.005
2019-05-21	3876.5	586.522	6.6093	0.272552	218	4814	589.444	8.16701	0.324219	214	3102	600.323	5.16722	0.208062	219								212	10.405	25.07	2608.53	208.683
2019-05-22	3876.5	586.522	6.6093	0.272552	219	4736	587.609	8.05979	0.318966	215	2041	605.921	3.36843	0.136897	220								213	8.97	28.8	2583.36	206.669
2019-05-23	1420.5	582.885	2.43702	0.0998734	220	3290	588.511	5.59038	0.221579	216	2041	605.921	3.36843	0.136897	221								214	9.274	29.66	2750.67	220.053
2019-05-24	1420.5	582.885	2.43702	0.0998734	221		589.242	0			1784.5	598.143	2.9834	0.119693	222								215	8.343	28.26	2357.73	188.619
2019-05-25											1784.5	598.143	2.9834	0.119693	223								216	6.884	28.26	1945.42	155.633
2019-05-26											1897	597.105	3.17699	0.127239	224								217	7.724	28.16	2175.08	174.006
2019-05-27											1868.5	601.111	3.10841	0.125327	225								218	6.523	25.76	1680.32	134.426
2019-05-28											1868.5	601.111	3.10841	0.125327	226								219	6.227	19.06	1186.87	94.9493
2019-05-29											1484	600.323	2.472	0.0995372	227								220	3.241	21.96	711.724	56.9379
2019-05-30											1484	600.323	2.472	0.0995372	228								221	3.241	21.96	711.724	56.9379
2019-05-31											1076	600.87	1.79074	0.0721712	229								222	2.61	22.96	599.256	47.9405
2020-05-31																							223	2.61
																							224	2.8
																							225	2.74
																							226	2.74
																							227	2.1
																							228	2.1
																							229	1.42

## Sheet: MV smoothed
Date	Tatua 78306 2018/19 Litres			Days from peak	Tatua 78306 2019/20 Litres				Tatua 78306 2020/21 Litres				Tatua 78306 2021/22 Litres					Means
2018-07-20	623.5		0	-87			0				0							Term	Fitted Mean
2018-07-21	757	754.875	0.053855	-86			0				0							Year
2018-07-22	757	780.3	0.0556689	-85			0				0							2018	8892.1
2018-07-23	882	873.2	0.0622967	-84			0				0							2019	9864.8
2018-07-24	882	939.4	0.0670196	-83			0		748.5	937.333	0.0635394	-81						2020	9761.6
2018-07-25	1088	1059	0.0755522	-82			0		748.5	1031.75	0.0699397	-80	1067	1276.17	0.0912304	-88		Days from peak
2018-07-26	1088	1153.6	0.0823012	-81			0		1315	1247.7	0.0845784	-79	1067	1380.75	0.0987068	-87		-87	1237.6
2018-07-27	1355	1304.6	0.093074	-80	743	1056.33	0.0728425	-89	1315	1520.3	0.103057	-78	1694.5	1624.9	0.116161	-86		-86	1371.1
2018-07-28	1355	1414.4	0.100907	-79	1213	1297.5	0.0894729	-88	2111.5	2003	0.135778	-77	1694.5	1931.8	0.1381	-85		-85	1371.1															13596.2	14329.2	14609.8	13785
2018-07-29	1637	1564.1	0.111588	-78	1213	1442.2	0.0994511	-87	2111.5	2372.4	0.160819	-76	2601.5	2341.6	0.167396	-84		-84	940.2
2018-07-30	1637	1660.4	0.118458	-77	2021	1853.5	0.127813	-86	3162	2923	0.198143	-75	2601.5	2783.5	0.198986	-83		-83	1175.2															Quadratic estimate
2018-07-31	1836.5	1840.3	0.131292	-76	2021	2170.8	0.149694	-85	3162	3314.3	0.224668	-74	3116	3225.4	0.230577	-82		-82	1016.5														Raw DFP	2018	2019	2020	2021
2018-08-01	1836.5	1963.8	0.140103	-75	2799.5	2907.4	0.200488	-84	4068	3856.2	0.261402	-73	3904	3628.1	0.259365	-81		-81	1285.8														-20	12181.6	14058.5	12810.7	13580.8
2018-08-02	2254.5	2153.3	0.153623	-74	2799.5	3164.9	0.218245	-83	4068	4188	0.283894	-72	3904	4136.7	0.295724	-80		-80	1563.7														-19	12292.1	14084.1	12967.4	13609.7
2018-08-03	2254.5	2302.9	0.164296	-73	4896	3422.4	0.236002	-82	4821	4686	0.317652	-71	4615	4542.4	0.324726	-79		-79	1823.2														-18	12398.1	14108.4	13117	13636.5
2018-08-04	2584.5	2484.9	0.17728	-72	3308.5	3823.1	0.263633	-81	4821	5002.8	0.339127	-70	5144.5	4883	0.349075	-78		-78	2182.7														-17	12499.6	14131.5	13259.4	13661
2018-08-05	2584.5	2583.3	0.1843	-71	3308.5	4368.2	0.301222	-80	5652	5485.9	0.371875	-69	5144.5	5223.6	0.373424	-77		-77	2053.6														-16	12596.7	14153.3	13394.8	13683.3
2018-08-06	2746.5	2826.7	0.201665	-70	4803	4494	0.309897	-79	5652	5818.4	0.394414	-68	5607	5597.7	0.400167	-76		-76	2769														-15	12689.2	14173.8	13522.9	13703.4
2018-08-07	2746.5	3004.1	0.214321	-69	5525	5072.5	0.349789	-78	6483.5	6298.6	0.426966	-67	5607	5865.9	0.41934	-75		-75	2769														-14	12777.3	14193.1	13644	13721.3
2018-08-08	3471.5	3270.3	0.233313	-68	5525	5651	0.389681	-77	6483.5	6612.6	0.448251	-66	6485.5	6248.5	0.446692	-74		-74	3708.5														-13	12860.8	14211	13757.9	13737
2018-08-09	3471.5	3504.1	0.249993	-67	6201	6071.5	0.418678	-76	7222	7013.8	0.475447	-65	6485.5	6538.6	0.46743	-73		-73	3949.2														-12	12939.9	14227.7	13864.6	13750.4
2018-08-10	3915.5	3825.9	0.272951	-66	6201	6347.6	0.437717	-75	7222	7335.5	0.497255	-64	7057.5	6942.4	0.496297	-72		-72	4310.2														-11	13014.4	14243.2	13964.2	13761.7
2018-08-11	3915.5	4002.7	0.285564	-65	6905.5	6693	0.461535	-74	7658	7654.4	0.518872	-63	7057.5	7295.7	0.521554	-71		-71	4535.5														-10	13084.5	14257.3	14056.7	13770.8
2018-08-12	4355.5	4317	0.307988	-64	6905.5	6904	0.476085	-73	8092	7940.6	0.538273	-62	7626	7688.2	0.549613	-70		-70	4866.5														-9	13150.1	14270.2	14142.1	13777.6
2018-08-13	4355.5	4542.5	0.324075	-63	7252	7197.4	0.496318	-72	8078	8173	0.554027	-61	8252	8015.9	0.573039	-69		-69	4378.6														-8	13211.1	14281.9	14220.3	13782.3
2018-08-14	5043	4801	0.342518	-62	7256	7378.7	0.50882	-71	8653	8380.4	0.568086	-60	8448	8367.2	0.598153	-68		-68	5620.2														-7	13267.7	14292.2	14291.3	13784.7
2018-08-15	5043	4971.5	0.354682	-61	7668	7695.2	0.530645	-70	8384	8558.2	0.580138	-59	8696	8640.8	0.617712	-67		-67	5735.7														-6	13319.8	14301.3	14355.3	13785
2018-08-16	5208	5118.5	0.365169	-60	7812	7904.8	0.545098	-69	8695	8741.8	0.592584	-58	8814	8842	0.632095	-66		-66	6131.2														-5	13367.4	14309.1	14412.1	13783
2018-08-17	5208	5128	0.365847	-59	8488	8158	0.562559	-68	8981	8844.6	0.599553	-57	8994	8951.4	0.639916	-65		-65	6268.5														-4	13410.5	14315.6	14461.7	13778.8
2018-08-18	5090.5	5311.5	0.378938	-58	8300	8385.8	0.578267	-67	8996	9067	0.614629	-56	9258	9120.2	0.651983	-64		-64	6608.5														-3	13449.1	14320.9	14504.3	13772.4
2018-08-19	5090.5	5462	0.389675	-57	8522	8654.6	0.596803	-66	9167	9231	0.625746	-55	8995	9424.6	0.673744	-63		-63	7983														-2	13483.2	14324.8	14539.6	13763.8
2018-08-20	5960.5	5747.8	0.410065	-56	8807	8862	0.611105	-65	9496	9405	0.637541	-54	9540	9688.6	0.692617	-62		-62	7140.3														-1	13512.9	14327.6	14567.9	13753
2018-08-21	5960.5	6057.1	0.432131	-55	9156	9096.2	0.627255	-64	9515	9616.6	0.651884	-53	10336	9858.8	0.704784	-61		-61	7406														0	13538	14329	14589	13740
2018-08-22	6637	6484	0.462588	-54	9525	9341.8	0.644191	-63	9851	9728.4	0.659463	-52	10314	10093	0.721526	-60		-60	7466.3														1	13558.6	14329.2	14603	13724.8
2018-08-23	6637	6736.9	0.48063	-53	9471	9570.2	0.659941	-62	10054	9829.4	0.66631	-51	10109	10243.2	0.732264	-59		-59	8618.5														2	13574.8	14328.1	14609.8	13707.4
2018-08-24	7225	7113	0.507462	-52	9750	9715.6	0.669967	-61	9726	9852.4	0.667869	-50	10166	10267.2	0.73398	-58		-58	8946														3	13586.4	14325.7	14609.5	13687.7
2018-08-25	7225	7350.4	0.524399	-51	9949	9809.8	0.676463	-60	10001	9889.2	0.670363	-49	10291	10311.4	0.737139	-57		-57	8926.5														4	13593.6	14322	14602.1	13665.9
2018-08-26	7841	7641.4	0.54516	-50	9883	10013.8	0.690531	-59	9630	9881.6	0.669848	-48	10456	10445.4	0.746719	-56		-56	8292.5														5	13596.2	14317.1	14587.5	13641.8
2018-08-27	7824	7800.4	0.556504	-49	9996	10144.6	0.69955	-58	10035	9987.8	0.677047	-47	10535	10643.2	0.760859	-55		-55	9415.5														6	13594.4	14310.9	14565.8	13615.6
2018-08-28	8092	8045.6	0.573997	-48	10491	10365.6	0.71479	-57	10016	10080.2	0.683311	-46	10779	10724.6	0.766678	-54		-54	8678.3														7	13588.1	14303.5	14536.9	13587.1
2018-08-29	8020	8227.6	0.586981	-47	10404	10577.8	0.729423	-56	10257	10254.2	0.695106	-45	11155	10863.6	0.776615	-53		-53	8828														8	13577.2	14294.7	14500.9	13556.5
2018-08-30	8451	8331.6	0.594401	-46	11054	10860.8	0.748938	-55	10463	10413	0.70587	-44	10698	10969.8	0.784207	-52		-52	9256.7														9	13561.9	14284.7	14457.8	13523.6
2018-08-31	8751	8499.6	0.606387	-45	10944	11041	0.761364	-54	10500	10565.8	0.716228	-43	11151	11098.4	0.7934	-51		-51	9118.3														10	13542.1	14273.5	14407.5	13488.5
2018-09-01	8344	8689.6	0.619942	-44	11411	11295	0.77888	-53	10829	10619.4	0.719862	-42	11066	11140	0.796374	-50		-50	9632														11	13517.8	14260.9	14350.1	13451.2
2018-09-02	8932	8801.6	0.627932	-43	11392	11025.6	0.760302	-52	10780	10679.8	0.723956	-41	11422	11323.4	0.809485	-49		-49	9466														12	13489	14247.1	14285.6	13411.7
2018-09-03	8970	8820.6	0.629288	-42	11674	11154.6	0.769198	-51	10525	10795.4	0.731792	-40	11363	11414	0.815962	-48		-48	9846														13	13455.7	14232	14213.9	13370
2018-09-04	9011	8949	0.638448	-41	9707	11209	0.772949	-50	10765	10912.4	0.739723	-39	11615	11538.2	0.824841	-47		-47	9809.3														14	13417.9	14215.6	14135.1	13326.1
2018-09-05	8846	8990.6	0.641416	-40	11589	11268	0.777018	-49	11078	11076.4	0.750841	-38	11604	11643.2	0.832347	-46		-46	10127.3														15	13375.6	14198	14049.2	13280
2018-09-06	8986	9044	0.645226	-39	11683	11375.4	0.784424	-48	11414	11313.2	0.766893	-37	11687	11699.6	0.836379	-45		-45	9640.3														16	13328.9	14179.1	13956.1	13231.6
2018-09-07	9140	9254.8	0.660265	-38	11687	11793.2	0.813234	-47	11600	11527.2	0.781399	-36	11947	11713.4	0.837365	-44		-44	10144.3														17	13277.6	14158.9	13855.8	13181.1
2018-09-08	9237	9411	0.671409	-37	12211	11885.4	0.819592	-46	11709	11693.4	0.792665	-35	11645	11732.8	0.838752	-43		-43	10481.3														18	13221.8	14137.4	13748.5	13128.3
2018-09-09	10065	9567	0.682538	-36	11796	11965.2	0.825095	-45	11835	11886.8	0.805775	-34	11684	11741.6	0.839381	-42		-42	10479														19	13161.6	14114.7	13634	13073.4
2018-09-10	9627	9777.2	0.697534	-35	12050	11979.2	0.826061	-44	11909	11992.2	0.81292	-33	11701	11683.2	0.835206	-41		-41	10582.3														20	13096.8	14090.7	13512.3	13016.2
2018-09-11	9766	9973.6	0.711546	-34	12082	11954.4	0.82435	-43	12381	12071.6	0.818303	-32	11731	11791.2	0.842927	-40		-40	10469
2018-09-12	10191	10066.8	0.718195	-33	11757	12116	0.835494	-42	12127	12175.6	0.825352	-31	11655	11857	0.847631	-39		-39	10704.7															13596.2	14329.2	14609.8	13785
2018-09-13	10219	10138.2	0.723289	-32	12087	12201.6	0.841397	-41	12106	12281.8	0.832552	-30	12185	11923.4	0.852378	-38		-38	10878.7
2018-09-14	10531	10275	0.733049	-31	12604	12293.2	0.847713	-40	12355	12282.2	0.832579	-29	12013	12017	0.859069	-37		-37	10864.7
2018-09-15	9984	10458	0.746105	-30	12478	12532.6	0.864222	-39	12440	12348	0.837039	-28	12033	12135	0.867505	-36		-36	11287
2018-09-16	10450	10658.4	0.760402	-29	12540	12755.2	0.879572	-38	12383	12467	0.845106	-27	12199	12141.4	0.867962	-35		-35	11355.3
2018-09-17	11106	10865.6	0.775184	-28	12954	12904.4	0.88986	-37	12456	12581	0.852834	-26	12245	12236.2	0.874739	-34		-34	11384.3
2018-09-18	11221	11130.4	0.794076	-27	13200	13148.4	0.906686	-36	12701	12684.2	0.859829	-25	12217	12399.6	0.88642	-33		-33	11704
2018-09-19	11567	11401.6	0.813424	-26	13350	13356.4	0.921029	-35	12925	12794.8	0.867326	-24	12487	12592.2	0.900189	-32		-32	11766.7
2018-09-20	11308	11617.8	0.828848	-25	13698	13590.8	0.937193	-34	12956	12945.8	0.877562	-23	12850	12802	0.915187	-31		-31	11945.7
2018-09-21	11806	11780.8	0.840477	-24	13580	13764.2	0.94915	-33	12936	13102.6	0.888191	-22	13162	13012.4	0.930228	-30		-30	11896.3
2018-09-22	12187	11947	0.852334	-23	14126	14017.6	0.966624	-32	13211	13208.6	0.895377	-21	13294	13246.4	0.946956	-29		-29	12196
2018-09-23	12036	12162	0.867673	-22	14067	14167.2	0.97694	-31	13485	13319.4	0.902888	-20	13269	13391.6	0.957336	-28		-28	12356.3
2018-09-24	12398	12274.4	0.875692	-21	14617	14277.6	0.984553	-30	13455	13405.6	0.908731	-19	13657	13432	0.960224	-27		-27	12601
2018-09-25	12383	12238.2	0.873109	-20	14446	14334.4	0.98847	-29	13510	13256.4	0.898617	-18	13576	13509.4	0.965757	-26		-26	12778.3
2018-09-26	12368	12462.4	0.889105	-19	14132	14405.6	0.99338	-28	13367	13210.8	0.895526	-17	13364	13598	0.972091	-25		-25	12950
2018-09-27	12006	12546.2	0.895083	-18	14410	14272.2	0.984181	-27	12465	13134.4	0.890347	-16	13681	13508	0.965657	-24		-24	13069.3
2018-09-28	13157	12637	0.901561	-17	14423	14274.6	0.984347	-26	13257	13006.4	0.88167	-15	13712	13492.1	0.964521	-23		-23	13085
2018-09-29	12817	12680.2	0.904643	-16	13950	14300.8	0.986153	-25	13073	13058	0.885168	-14	13207	13576.5	0.970554	-22		-22	13219
2018-09-30	12837	12798.8	0.913104	-15	14458	14253	0.982857	-24	12870	13266.8	0.899322	-13	13496.5	13602.9	0.972441	-21		-21	13435.3
2018-10-01	12584	12632.2	0.901219	-14	14263	14204	0.979478	-23	13625	13357.4	0.905464	-12	13786	13541.3	0.968038	-20		-20	12971.3
2018-10-02	12599	12569.2	0.896724	-13	14171	14244.2	0.98225	-22	13509	13557.2	0.919008	-11	13813	13615.7	0.973356	-19		-19	13445.3
2018-10-03	12324	12537.8	0.894484	-12	14178	14179.4	0.977782	-21	13710	13860.6	0.939574	-10	13404	13526.8	0.967001	-18		-18	13212
2018-10-04	12502	12586.6	0.897965	-11	14151	14165.6	0.97683	-20	14072	14059.4	0.95305	-9	13579	13588.2	0.971391	-17		-17	13791.7
2018-10-05	12680	12699.9	0.906048	-10	14134	14049.4	0.968817	-19	14387	14247.8	0.965822	-8	13052	13573.2	0.970318	-16		-16	13417.3
2018-10-06	12828	12935.7	0.922871	-9	14194	13994.2	0.965011	-18	14619	14455.4	0.979894	-7	14093	13701.8	0.979512	-15		-15	13353.7
2018-10-07	13165.5	13070.3	0.932474	-8	13590	14034.4	0.967783	-17	14451	14501.8	0.98304	-6	13738	13659.4	0.976481	-14		-14	13196
2018-10-08	13503	13192.5	0.941192	-7	13902	14096.8	0.972086	-16	14748	14593	0.989222	-5	14047	13852.2	0.990263	-13		-13	13472.7
2018-10-09	13175	13312.3	0.949739	-6	14352	14100.4	0.972334	-15	14304	14600.2	0.98971	-4	13367	13722.6	0.980999	-12		-12	13141
2018-10-10	13291	13435.4	0.958521	-5	14446	14205.8	0.979602	-14	14843	14627.4	0.991554	-3	14016	13764.8	0.984015	-11		-11	13499
2018-10-11	13427	13552.2	0.966854	-4	14212	14272.6	0.984209	-13	14655	14631	0.991798	-2	13445	13681.8	0.978082	-10		-10	13701.3
2018-10-12	13781	13710	0.978112	-3	14117	14338.8	0.988774	-12	14587	14752	1	-1	13949	13692.6	0.978854	-9		-9	13887
2018-10-13	14087	13896.4	0.99141	-2	14236	14320.2	0.987491	-11	14766	14665.8	0.994157	0	13632	13599	0.972163	-8		-8	13628.3
2018-10-14	13964	14013.2	0.999743	-1	14683	14353.2	0.989767	-10	14909	14685.2	0.995472	1	13421	13752.4	0.983129	-7		-7	14023.7
2018-10-15	14223	14016.8	1	0	14353	14412.4	0.993849	-9	14412	14637	0.992204	2	13548	13707.4	0.979912	-6		-6	14053
2018-10-16	14011	13965.2	0.996319	1	14377	14351	0.989615	-8	14752	14591.2	0.9891	3	14212	13768.6	0.984287	-5		-5	14092.7
2018-10-17	13799	13866	0.989241	2	14413	14384	0.991891	-7	14346	14560.6	0.987025	4	13724	13861.6	0.990935	-4		-4	14207.7
2018-10-18	13829	13724.2	0.979125	3	13929	14344	0.989132	-6	14537	14614.8	0.9907	5	13938	13838.6	0.989291	-3		-3	14271
2018-10-19	13468	13693	0.976899	4	14848	14250.8	0.982705	-5	14756	14516.8	0.984056	6	13886	13868.2	0.991407	-2		-2	14362.3
2018-10-20	13514	13653.8	0.974103	5	14153	14310.8	0.986843	-4	14683	14498.2	0.982796	7	13433	13904.6	0.994009	-1		-1	14219.7
2018-10-21	13855	13609.6	0.970949	6	13911	14457	0.996924	-3	14262	14518.2	0.984151	8	14360	13910.6	0.994438	0		0	14660
2018-10-22	13603	13511.6	0.963958	7	14713	14312	0.986926	-2	14253	14470	0.980884	9	13906	13904	0.993966	1		1	13810.7
2018-10-23	13608	13373.8	0.954126	8	14660	14343	0.989063	-1	14637	14346	0.972478	10	13968	13988.4	1	2		2	14154
2018-10-24	12978	13143.8	0.937718	9	14123	14486.4	0.998952	0	14515	14432.8	0.978362	11	13853	13806.4	0.986989	3		3	14296
2018-10-25	12825	13079.4	0.933123	10	14308	14443.4	0.995987	1	14063	14361.2	0.973509	12	13855	13792.8	0.986017	4		4	14221.7
2018-10-26	12705	13001.6	0.927573	11	14628	14423.2	0.994594	2	14696	14171	0.960616	13	13450	13703.4	0.979626	5		5	14131
2018-10-27	13281	13103	0.934807	12	14498	14487.4	0.999021	3	13895	13968.4	0.946882	14	13838	13643.4	0.975337	6		6	14282
2018-10-28	13219	13199.4	0.941684	13	14559	14501.6	1	4	13686	13973	0.947194	15	13521	13602.6	0.97242	7		7	14164.3
2018-10-29	13485	13311.4	0.949675	14	14444	14310.4	0.986815	5	13502	13933.4	0.944509	16	13553	13546	0.968374	8		8	14119.7
2018-10-30	13307	13343.4	0.951958	15	14379	14122.2	0.973837	6	14086	13862.4	0.939696	17	13651	13368.2	0.955663	9		9	14058
2018-10-31	13265	13396.8	0.955767	16	13672	14009.8	0.966087	7	14498	13766.2	0.933175	18	13167	13333.4	0.953175	10		10	13928
2018-11-01	13441	13399.8	0.955981	17	13557	13911	0.959273	8	13540	13896	0.941974	19	12949	13287.8	0.949916	11		11	13715.7
2018-11-02	13486	13392.4	0.955453	18	13997	13942.8	0.961466	9	13205	13902.4	0.942408	20	13347	13149.6	0.940036	12		12	13883
2018-11-03	13500	13412	0.956852	19	13950	14055	0.969203	10	14151	13823.2	0.937039	21	13325	13148.8	0.939979	13		13	13557
2018-11-04	13270	13358.6	0.953042	20	14538	14188.2	0.978389	11	14118	13856.2	0.939276	22	12960	13128	0.938492	14		14	13722.7
2018-11-05	13363	13328.6	0.950902	21	14233	14243.6	0.982209	12	14102	14023.6	0.950624	23	13163	13044.2	0.932501	15		15	13586.3
2018-11-06	13174	13195.4	0.941399	22	14223	14264.8	0.983671	13	13705	13942.2	0.945106	24	12845	13056.2	0.933359	16		16	13963
2018-11-07	13336	13053.6	0.931282	23	14274	14167.4	0.976954	14	14042	13936.8	0.94474	25	12928	13152.6	0.94025	17		17	14057.3
2018-11-08	12834	12891.8	0.919739	24	14056	14052.4	0.969024	15	13744	13704.8	0.929013	26	13385	13212.4	0.944525	18		18	13749.7
2018-11-09	12561	12787.4	0.912291	25	14051	13985.2	0.96439	16	14091	13711	0.929433	27	13442	13260	0.947928	19		19	13659.7
2018-11-10	12554	12717.4	0.907297	26	13658	13943.2	0.961494	17	12942	13556.4	0.918953	28	13462	13296	0.950502	20		20	13825.7
2018-11-11	12652	12666.4	0.903658	27	13887	13953.2	0.962183	18	13736	13414.6	0.909341	29	13083	13323.2	0.952446	21		21	13844
2018-11-12	12986	12663.8	0.903473	28	14064	13916.2	0.959632	19	13269	13190	0.894116	30	13108	13191.8	0.943053	22		22	13644.7
2018-11-13	12579	12774	0.911335	29	14106	13953.6	0.962211	20	13035	13178.2	0.893316	31	13521	13076	0.934775	23		23	13642.7
2018-11-14	12548	12720.6	0.907525	30	13866	13906.4	0.958956	21	12968	12971	0.879271	32	12785	13094.4	0.93609	24		24	13646.7
2018-11-15	13105	12478	0.890217	31	13845	13760.8	0.948916	22	12883	12898	0.874322	33	12883	12977	0.927697	25		25	13470.3
2018-11-16	12385	12391	0.884011	32	13651	13672.8	0.942848	23	12700	12871.8	0.872546	34	13175	12743	0.910969	26		26	13503.7
2018-11-17	11773	12263.6	0.874922	33	13336	13550.6	0.934421	24	12904	12872.8	0.872614	35	12521	12712	0.908753	27		27	13146.3
2018-11-18	12144	12226	0.872239	34	13666	13399.2	0.923981	25	12904	12862.4	0.871909	36	12351	12603.4	0.900989	28		28	13457.7
2018-11-19	11911	12236.4	0.872981	35	13255	13175.6	0.908562	26	12973	12819	0.868967	37	12630	12574.6	0.898931	29		29	13061.3
2018-11-20	12917	12364.6	0.882127	36	13088	13174.4	0.908479	27	12831	12793.4	0.867232	38	12340	12533.8	0.896014	30		30	13083
2018-11-21	12437	12459	0.888862	37	12533	13119.8	0.904714	28	12483	12736.8	0.863395	39	13031	12579.5	0.899281	31		31	13109.3
2018-11-22	12414	12464.8	0.889276	38	13330	13246.4	0.913444	29	12776	12689.8	0.860209	40	12317	12562.7	0.898077	32		32	12785.3
2018-11-23	12616	12315.6	0.878631	39	13393	13361	0.921347	30	12621	12616.4	0.855233	41			0			33	12335.3
2018-11-24	11940	12250	0.873951	40	13888	13657.2	0.941772	31	12738	12514.8	0.848346	42			0			34	12792.7
2018-11-25	12171	12251.2	0.874037	41	13661	13662.6	0.942144	32	12464	12334	0.83609	43			0			35	12736
2018-11-26	12109	12092	0.862679	42	14014	13699	0.944654	33	11975	12182	0.825786	44			0			36	13259.3
2018-11-27	12420	12228.4	0.87241	43	13357	13620.2	0.93922	34	11872	11979	0.812025	45			0			37	12976.3
2018-11-28	11820	12246.2	0.87368	44	13575	13552.4	0.934545	35	11861	11801.6	0.8	46			0			38	12970.3
2018-11-29	12622	12171.8	0.868372	45	13494	13257	0.914175	36	11723	11730.4	0.795174	47			0			39	12916.3
2018-11-30	12260	12050.4	0.859711	46	13322	13245	0.913347	37	11577	11661.2	0.790483	48			0			40	12712
2018-12-01	11737	12243.4	0.87348	47	12537	13141	0.906176	38	11619	11571	0.784368	49			0			41	12801
2018-12-02	11813	11716.4	0.835883	48	13297	13064.4	0.900894	39	11526	11503.6	0.779799	50			0			42	12631.7
2018-12-03	12785	11570	0.825438	49	13055	12960.4	0.893722	40	11410	11456.8	0.776627	51			0			43	12310.7
2018-12-04	9987	11590	0.826865	50	13111	13011	0.897211	41	11386	11423.4	0.774363	52			0			44	12329.7
2018-12-05	11528	11623.8	0.829276	51	12802	12955.8	0.893405	42	11343	11437.4	0.775312	53			0			45	12512.7
2018-12-06	11837	11397.4	0.813124	52	12790	12923.8	0.891198	43	11452	11429	0.774742	54			0			46	12364.7
2018-12-07	11982	11842	0.844843	53	13021	12976.4	0.894825	44	11596	11500.2	0.779569	55			0			47	12038.7
2018-12-08	11653	11999	0.856044	54	12895	12979.2	0.895018	45	11368	11579	0.784911	56			0			48	12074
2018-12-09	12210	11951.2	0.852634	55	13374	13018.4	0.897722	46	11742	11605.8	0.786727	57			0			49	12444
2018-12-10	12313	12043.6	0.859226	56	12816	12994.6	0.89608	47	11737	11499.4	0.779515	58			0			50	11845.5
2018-12-11	11598	12089.2	0.862479	57	12986	13030.6	0.898563	48	11586	11553.8	0.783202	59			0			51	12096
2018-12-12	12444	11889.2	0.848211	58	12902	12946.8	0.892784	49	11064	11502.6	0.779732	60			0			52	11998.7
2018-12-13	11881	11632.6	0.829904	59	13075	12931.8	0.89175	50	11640	11456.6	0.776613	61			0			53	12140
2018-12-14	11210	11568.4	0.825324	60	12955	12880.8	0.888233	51	11486	11407.8	0.773305	62			0			54	12050.3
2018-12-15	11030	11380.4	0.811911	61	12741	12915.2	0.890605	52	11507	11552.4	0.783107	63			0			55	12217.7
2018-12-16	11277	11275.2	0.804406	62	12731	12843.4	0.885654	53	11342	11626	0.788097	64			0			56	12336.7
2018-12-17	11504	11371	0.811241	63	13074	12807	0.883144	54	11787	11682.2	0.791906	65			0			57	12025.3
2018-12-18	11355	11443.8	0.816435	64	12716	12780.2	0.881296	55	12008	11828.2	0.801803	66			0			58	12253.7
2018-12-19	11689	11476.8	0.818789	65	12773	12796.2	0.882399	56	11767	12037.2	0.815971	67			0			59	12006.3
2018-12-20	11394	11495.2	0.820102	66	12607	12710.4	0.876483	57	12237	12085.6	0.819252	68			0			60	11855.3
2018-12-21	11442	11376	0.811598	67	12811	12702.6	0.875945	58	12387	12086.2	0.819292	69			0			61	11763
2018-12-22	11596	11323.2	0.807831	68	12645	12714.4	0.876758	59	12029	12124	0.821855	70			0			62	11797
2018-12-23	10759	11412.4	0.814194	69	12677	12679.8	0.874372	60	12011	11905.2	0.807023	71			0			63	11885.7
2018-12-24	11425	11370	0.811169	70	12832	12789	0.881903	61	11956	11724.6	0.79478	72			0			64	11929
2018-12-25	11840	11314.8	0.807231	71	12434	12759.8	0.879889	62	11143	11584	0.785249	73			0			65	12124.7
2018-12-26	11230	11395.2	0.812967	72	13357	12702.8	0.875959	63	11484	11588.4	0.785548	74			0			66	11997.7
2018-12-27	11320	11398	0.813167	73	12499	12583.2	0.867711	64	11326	11468	0.777386	75			0			67	12037.7
2018-12-28	11161	11293.4	0.805705	74	12392	12516.8	0.863132	65	12033	11671.2	0.791161	76			0			68	12446.7
2018-12-29	11439	11316.4	0.807345	75	12234	12322.2	0.849713	66	11354	11804	0.800163	77			0			69	11762.3
2018-12-30	11317	11376.2	0.811612	76	12102	12365	0.852665	67	12159	11917.6	0.807863	78			0			70	11942.7
2018-12-31	11345	11318.6	0.807502	77	12384	12410	0.855768	68	12148	11864.8	0.804284	79			0			71	12010
2019-01-01	11619	11324.6	0.80793	78	12713	12453.2	0.858747	69	11894	11845	0.802942	80			0			72	11491.7
2019-01-02	10873	11174.6	0.797229	79	12617	12512.8	0.862857	70	11769	11681.6	0.791866	81			0			73	11729.3
2019-01-03	11469	11260.4	0.80335	80	12450	12475.2	0.860264	71	11255	11567	0.784097	82			0			74	11733.3
2019-01-04	10567	11200.2	0.799055	81	12400	12372.8	0.853202	72	11342	11435	0.775149	83			0			75	12029.7
2019-01-05	11774	11255.2	0.802979	82	12196	12431	0.857216	73	11575	11352.6	0.769563	84			0			76	11707
2019-01-06	11318	11132.2	0.794204	83	12201	12523.4	0.863587	74	11234	11374	0.771014	85			0			77	11968
2019-01-07	11148	11259.6	0.803293	84	12908	12543.6	0.86498	75	11357	11369.6	0.770716	86			0			78	11987.7
2019-01-08	10854	10987.4	0.783874	85	12912	12602.6	0.869049	76	11362	11286.6	0.765089	87			0			79	11656
2019-01-09	11204	10884.6	0.77654	86	12501	12686.4	0.874828	77	11320	11401.8	0.772899	88			0			80	12048.7
2019-01-10	10413	10667.4	0.761044	87	12491	12567.4	0.866622	78	11160	11513.4	0.780464	89			0			81	11578
2019-01-11	10804	10387.8	0.741096	88	12620	12430.4	0.857174	79	11810	11547	0.782741	90			0			82	11872.3
2019-01-12	10062	10105	0.720921	89	12313	12286.8	0.847272	80	11915	11569.2	0.784246	91			0			83	11794.7
2019-01-13	9456	9972.8	0.711489	90	12227	12092.4	0.833867	81	11530	11532.8	0.781779	92			0			84	11667.3
2019-01-14	9790	9763.8	0.696578	91	11783	11574.6	0.79816	82	11431	11355.2	0.76974	93			0			85	11508
2019-01-15	9752	9917.4	0.707537	92	11519	11438.6	0.788782	83	10978	11171.6	0.757294	94			0			86	11597.7
2019-01-16	9759	10143.8	0.723689	93	10031	11193	0.771846	84	10922	11129.8	0.75446	95			0			87	11172
2019-01-17	10830	10288.4	0.734005	94	11633	11082	0.764192	85	10997	11170	0.757185	96			0			88	11161
2019-01-18	10588	10394	0.741539	95	10999	10949.6	0.755062	86	11321	11257.2	0.763097	97			0			89	10634.3
2019-01-19	10513	10479	0.747603	96	11228	11063.8	0.762937	87	11632	11362.2	0.770214	98			0			90	11467
2019-01-20	10280	10358.4	0.738999	97	10857	10873.8	0.749835	88	11414	11435	0.775149	99			0			91	10773
2019-01-21	10184	10288.8	0.734033	98	10602	10733.6	0.740167	89	11447	11475	0.777861	100			0			92	10803.7
2019-01-22	10227	10321.8	0.736388	99	10683	10493.4	0.723603	90	11361	11449.4	0.776125	101			0			93	10531.3
2019-01-23	10240	10329.2	0.736916	100	10298	10339.6	0.712997	91	11521	11442	0.775624	102			0			94	10784.7
2019-01-24	10678	10212.2	0.728569	101	10027	10150	0.699923	92	11504	11363.8	0.770323	103			0			95	10756
2019-01-25	10317	10105.2	0.720935	102	10088	10015	0.690613	93	11377	11270.8	0.764018	104			0			96	10710.7
2019-01-26	9599	9987.6	0.712545	103	9654	9896.8	0.682463	94	11056	11013.4	0.74657	105			0			97	10646.3
2019-01-27	9692	9728.2	0.694039	104	10008	9806	0.676201	95	10896	10778.6	0.730653	106			0			98	10562
2019-01-28	9652	9642	0.687889	105	9707	9702.8	0.669085	96	10234	10500.6	0.711809	107			0			99	10442.7
2019-01-29	9381	9704.6	0.692355	106	9573	9707.2	0.669388	97	10330	10305.2	0.698563	108			0			100	10536.3
2019-01-30	9886	9884.8	0.705211	107	9572	9567.4	0.659748	98	9987	10194	0.691025	109			0			101	10635.3
2019-01-31	9912	9937.8	0.708992	108	9676	9488.8	0.654328	99	10079	10192.6	0.69093	110			0			102	10464.7
2019-02-01	10593	9960.4	0.710604	109	9309	9451.8	0.651776	100	10340	10191.2	0.690835	111			0			103	10182.7
2019-02-02	9917	9930.8	0.708493	110	9314	9390.4	0.647542	101	10227	10211	0.692177	112			0			104	10141.3
2019-02-03	9494	9859	0.70337	111	9388	9373.8	0.646398	102	10323	10097.6	0.68449	113			0			105	9952.3
2019-02-04	9738	9639	0.687675	112	9265	9324.4	0.642991	103	10086	9979	0.676451	114			0			106	9643
2019-02-05	9553	9562.8	0.682238	113	9593	9260.8	0.638605	104	9512	9935.4	0.673495	115			0			107	9868
2019-02-06	9493	9556.8	0.68181	114	9062	9138.4	0.630165	105	9747	9843.8	0.667286	116			0			108	9721.3
2019-02-07	9536	9432.4	0.672935	115	8996	9091.6	0.626938	106	10009	9796	0.664046	117			0			109	10088.3
2019-02-08	9464	9435.2	0.673135	116	8776	8833.2	0.609119	107	9865	9902.4	0.671258	118			0			110	9773
2019-02-09	9116	9392	0.670053	117	9031	8632.4	0.595272	108	9847	9928.4	0.673021	119			0			111	9572.3
2019-02-10	9567	9397.6	0.670453	118	8301	8490.6	0.585494	109	10044	9911	0.671841	120			0			112	9612.3
2019-02-11	9277	9378.2	0.669069	119	8058	8433.2	0.581536	110	9877	9874	0.669333	121			0			113	9556.7
2019-02-12	9564	9364.8	0.668113	120	8287	8331.8	0.574543	111	9922	9823.6	0.665916	122			0			114	9102
2019-02-13	9367	9322	0.665059	121	8489	8472.2	0.584225	112	9680	9808	0.664859	123			0			115	9113.7
2019-02-14	9049	9335.4	0.666015	122	8524	8592	0.592486	113	9595	9765.2	0.661958	124			0			116	9253.3
2019-02-15	9353	9260.8	0.660693	123	9003	8630.6	0.595148	114	9966	9599.8	0.650746	125			0			117	9156.7
2019-02-16	9344	9163.8	0.653773	124	8657	8579	0.59159	115	9663	9469.8	0.641933	126			0			118	9312.7
2019-02-17	9191	9088.4	0.648393	125	8480	8494.6	0.58577	116	9095	9433	0.639439	127			0			119	9441.3
2019-02-18	8882	8970.6	0.639989	126	8231	8292	0.571799	117	9030	9372.8	0.635358	128			0			120	9366
2019-02-19	8672	8931.4	0.637193	127	8102	8126.8	0.560407	118	9411	9411	0.637947	129			0			121	9256.3
2019-02-20	8764	8806.8	0.628303	128	7990	8026.2	0.55347	119	9665	9550.8	0.647424	130			0			122	8986.7
2019-02-21	9148	8812.8	0.628731	129	7831	7934.4	0.54714	120	9854	9677.4	0.656006	131			0			123	9016.7
2019-02-22	8568	8850.4	0.631414	130	7977	7860.8	0.542064	121	9794	9816.4	0.665428	132			0			124	9100
2019-02-23	8912	8890.6	0.634282	131	7772	7797.2	0.537679	122	9663	9639.2	0.653416	133			0			125	8895
2019-02-24	8860	8886.8	0.634011	132	7734	7872.2	0.54285	123	10106	9426	0.638964	134			0			126	8651.3
2019-02-25	8965	8926.2	0.636822	133	7672	7902.8	0.544961	124	8779	9184.4	0.622587	135			0			127	8491.3
2019-02-26	9129	8850.4	0.631414	134	8206	8020.6	0.553084	125	8788	8888.6	0.602535	136			0			128	8636.3
2019-02-27	8765	8751	0.624322	135	8130	8077.2	0.556987	126	8586	8557.6	0.580098	137			0			129	8828.3
2019-02-28	8533	8578.4	0.612008	136	8361	8179	0.564007	127	8184	8507.8	0.576722	138			0			130	8876
2019-03-01	8363	8443	0.602349	137	8017	8154.6	0.562324	128	8451	8451.6	0.572912	139			0			131	8945.3
2019-03-02	8102	8303	0.592361	138	8181	8079.8	0.557166	129	8530	8436.4	0.571882	140			0			132	8961.3
2019-03-03	8452	8198	0.58487	139	8084	7969.2	0.549539	130	8507	8488.8	0.575434	141			0			133	9029.3
2019-03-04	8065	8175.6	0.583272	140	7756	7960.6	0.548946	131	8510	8468.8	0.574078	142			0			134	8696.3
2019-03-05	8008	8199	0.584941	141	7808	7910	0.545457	132	8446	8435.6	0.571828	143			0			135	8545.7
2019-03-06	8251	8116.2	0.579034	142	7974	7883.2	0.543609	133	8351	8372	0.567516	144			0			136	8291.7
2019-03-07	8219	8054.6	0.574639	143	7928	7878.2	0.543264	134	8364	8406.2	0.569835	145			0			137	8118.3
2019-03-08	8038	8024.6	0.572499	144	7950	7890.2	0.544092	135	8189	8407.6	0.56993	146			0			138	8175.7
2019-03-09	7757	7962.2	0.568047	145	7731	7837.8	0.540478	136	8681	8431	0.571516	147			0			139	8303.3
2019-03-10	7858	7895.6	0.563295	146	7868	7810.2	0.538575	137	8453	8457.2	0.573292	148			0			140	8174
2019-03-11	7939	7828.6	0.558515	147	7712	7769.4	0.535762	138	8468	8519	0.577481	149			0			141	8083
2019-03-12	7886	7813.4	0.557431	148	7790	7718.4	0.532245	139	8495	8428.2	0.571326	150			0			142	8188.3
2019-03-13	7703	7770.6	0.554378	149	7746	7584.2	0.522991	140	8498	8419.6	0.570743	151			0			143	8094
2019-03-14	7681	7775.2	0.554706	150	7476	7559.6	0.521294	141	8227	8421.2	0.570851	152			0			144	8064
2019-03-15	7644	7755	0.553265	151	7197	7488.6	0.516398	142	8410	8397	0.569211	153			0			145	7897.3
2019-03-16	7962	7774.2	0.554634	152	7589	7420	0.511668	143	8476	8426.4	0.571204	154			0			146	8005
2019-03-17	7785	7807.2	0.556989	153	7435	7346.2	0.506579	144	8374	8459.6	0.573454	155			0			147	7863
2019-03-18	7799	7737.4	0.552009	154	7403	7406	0.510702	145	8645	8509.6	0.576844	156			0			148	7981
2019-03-19	7846	7672.2	0.547357	155	7107	7262.8	0.500827	146	8393	8505.8	0.576586	157			0			149	7877.7
2019-03-20	7295	7632.4	0.544518	156	7496	7213	0.497393	147	8660	8494.2	0.5758	158			0			150	7860.7
2019-03-21	7636	7589.4	0.54145	157	6873	7163.4	0.493973	148	8457	8386.8	0.56852	159			0			151	7659.3
2019-03-22	7586	7531.8	0.537341	158	7186	7174.8	0.494759	149	8316	8383.2	0.568275	160			0			152	7956
2019-03-23	7584	7525	0.536856	159	7155	7083.6	0.48847	150	8108	8331.2	0.564751	161			0			153	7711.3
2019-03-24	7558	7425	0.529721	160	7164	7129.6	0.491642	151	8375	8122.2	0.550583	162			0			154	7786.3
2019-03-25	7261	7350.2	0.524385	161	7040	7155	0.493394	152	8400	8027	0.54413	163			0			155	7882
2019-03-26	7136	7322.8	0.52243	162	7103	7186.6	0.495573	153	7412	7836.4	0.531209	164			0			156	7617.3
2019-03-27	7212	7299.8	0.520789	163	7313	7215.7	0.49758	154	7840	7723.8	0.523576	165			0			157	7778.7
2019-03-28	7447	7355.2	0.524742	164	7313	7269.6	0.501296	155	7155	7568	0.513015	166			0			158	7715.3
2019-03-29	7443	7459.4	0.532176	165	7309.5	7256.8	0.500414	156	7812	7590.2	0.51452	167			0			159	7737.7
2019-03-30	7538	7556.6	0.53911	166	7309.5	7202	0.496635	157	7621	7551.8	0.511917	168			0			160	7659.7
2019-03-31	7657	7597.6	0.542035	167	7039	7245.8	0.499655	158	7523	7619.4	0.516499	169			0			161	7648.5
2019-04-01	7698	7635.4	0.544732	168	7039	7290.3	0.502724	159	7648	7588.6	0.514412	170			0			162	7615.2
2019-04-02	7652	7702	0.549483	169	7532	7406.6	0.510744	160	7493	7649.8	0.51856	171			0			163	7221
2019-04-03	7632	7746.2	0.552637	170	7532	7577	0.522494	161	7658	7641.6	0.518004	172			0			164	7442
2019-04-04	7871	7723	0.550982	171	7891	7687.8	0.530135	162	7927	7671.6	0.520038	173			0			165	7376.7
2019-04-05	7878	7756.6	0.553379	172	7891	7791.6	0.537292	163	7482	7728.2	0.523875	174			0			166	7627.3
2019-04-06	7582	7713.4	0.550297	173	7593	7891.4	0.544174	164	7798	7775.2	0.527061	175			0			167	7723
2019-04-07	7820	7570.2	0.54008	174	8051	7906	0.545181	165	7776	7750.4	0.52538	176			0			168	7704
2019-04-08	7416	7376.8	0.526283	175	8031	7957.8	0.548753	166	7893	7843.4	0.531684	177			0			169	7631
2019-04-09	7155	7262.6	0.518135	176	7964	8101	0.558628	167	7803	7869.4	0.533446	178			0			170	7725.3
2019-04-10	6911	7191.6	0.51307	177	8150	8074	0.556766	168	7947	7923	0.53708	179			0			171	7853.3
2019-04-11	7011	7176.2	0.511971	178	8309	8074.8	0.556821	169	7928	7895.2	0.535195	180			0			172	7923
2019-04-12	7465	7206.8	0.514154	179	7916	8117.4	0.559759	170	8044	7933.6	0.537798	181			0			173	7738
2019-04-13	7339	7301.4	0.520903	180	8035	8137.6	0.561152	171	7754	7823.8	0.530355	182			0			174	7975.7
2019-04-14	7308	7398.6	0.527838	181	8177	8065.4	0.556173	172	7995	7832	0.530911	183			0			175	7702.7
2019-04-15	7384	7365.4	0.525469	182	8251	8084.6	0.557497	173	7398	7773.2	0.526925	184			0			176	7694.3
2019-04-16	7497	7339	0.523586	183	7948	8129.6	0.5606	174	7969	7775	0.527047	185			0			177	7630.3
2019-04-17	7299	7310.8	0.521574	184	8012	8111.6	0.559359	175	7750	7654.8	0.518899	186			0			178	7736.3
2019-04-18	7207	7322.8	0.52243	185	8260	8047	0.554904	176	7763	7716.8	0.523102	187			0			179	7780.3
2019-04-19	7167	7258.8	0.517864	186	8087	8094.2	0.558159	177	7394	7677.4	0.520431	188			0			180	7798.3
2019-04-20	7444	7181.8	0.512371	187	7928	8099.6	0.558531	178	7708	7717	0.523116	189			0			181	7774
2019-04-21	7177	7054.6	0.503296	188	8184	8073.6	0.556739	179	7772	7661.2	0.519333	190			0			182	7822
2019-04-22	6914	6973.4	0.497503	189	8039	8070	0.55649	180	7948	7771.4	0.526803	191			0			183	7607.7
2019-04-23	6571	6746.8	0.481337	190	8130	8050.6	0.555153	181	7484	7797	0.528539	192			0			184	7817.3
2019-04-24	6761	6714.6	0.479039	191	8069	8032.6	0.553911	182	7945	7825.6	0.530477	193			0			185	7665.3
2019-04-25	6311	6788.6	0.484319	192	7831	8076	0.556904	183	7836	7720.8	0.523373	194			0			186	7686.7
2019-04-26	7016	6793.2	0.484647	193	8094	8041.8	0.554546	184	7915	7784.4	0.527684	195			0			187	7635.7
2019-04-27	7284	6746.4	0.481308	194	8256	7984.6	0.550601	185	7424	7711.8	0.522763	196			0			188	7572
2019-04-28	6594	6768.2	0.482863	195	7959	7944.4	0.547829	186	7802	7647.6	0.518411	197			0			189	7593.3
2019-04-29	6527	6640	0.473717	196	7783	7860.8	0.542064	187	7582	7678.4	0.520499	198			0			190	7591.7
2019-04-30	6420	6130.4	0.437361	197	7630	7738.2	0.53361	188	7515	7690.2	0.521299	199			0			191	7401.3
2019-05-01	6375	5860	0.41807	198	7676	7645.8	0.527238	189	8069	7586.8	0.51429	200			0			192	7346.3
2019-05-02	4736	5581.4	0.398194	199	7643	7648.8	0.527445	190	7483	7595.8	0.5149	201			0			193	7494
2019-05-03	5242	5286.4	0.377147	200	7497	7720.2	0.532369	191	7285	7591.8	0.514629	202			0			194	7625
2019-05-04	5134	5113	0.364777	201	7798	7647.2	0.527335	192	7627	7802.8	0.528932	203			0			195	7220.3
2019-05-05	4945	5238	0.373694	202	7987	7571.2	0.522094	193	7495	7922.2	0.537025	204			0			196	7275.3
2019-05-06	5508	5246.8	0.374322	203	7311	7535.2	0.519612	194	9124	7595.6	0.514886	205			0			197	7266.7
2019-05-07	5361	5309.8	0.378817	204	7263	7446.2	0.513474	195	8080	7306.8	0.495309	206			0			198	7292.3
2019-05-08	5286	5439.8	0.388091	205	7317	7314.6	0.5044	196	5652	7491	0.507796	207			0			199	6705.3
2019-05-09	5449	5495	0.39203	206	7353	7394.4	0.509902	197	6183	6777	0.459395	208			0			200	6662.7
2019-05-10	5595	5461.2	0.389618	207	7329	7480.8	0.51586	198	8416	6720.6	0.455572	209			0			201	6578.7
2019-05-11	5784	5515.2	0.393471	208	7710	7540	0.519943	199	5554	6671.8	0.452264	210			0			202	6641.7
2019-05-12	5192	5392.4	0.38471	209	7695	7569.6	0.521984	200	7798	6952	0.471258	211			0			203	6777.3
2019-05-13	5556	5344.7	0.381307	210	7613	7616.8	0.525239	201	5408	6245.4	0.42336	212			0			204	6663.2
2019-05-14	4835	5259.2	0.375207	211	7501	7494.2	0.516784	202	7584	6339.8	0.429759	213			0			205	7020.3
2019-05-15	5356.5	5353.7	0.381949	212	7565	7401	0.510357	203	4883	5662.2	0.383826	214			0			206	6238
2019-05-16	5356.5	5375.4	0.383497	213	7097	7105.4	0.489974	204	6026	5381.4	0.364791	215			0			207	6426.3
2019-05-17	5664.5	5398.5	0.385145	214	7229	6733	0.464294	205	4410	4638.8	0.314452	216			0			208	7255
2019-05-18	5664.5	5317.3	0.379352	215	6135	6366	0.438986	206	4004	4357	0.29535	217			0			209	5947.7
2019-05-19	4950.5	5021.3	0.358234	216	5639	5909.4	0.4075	207	3871	3772.2	0.255708	218			0			210	6861
2019-05-20	4950.5	4663.7	0.332722	217	5730	5410.8	0.373117	208	3474	3298.4	0.22359	219			0			211	5459.3
2019-05-21	3876.5	3814.9	0.272166	218	4814	4841.8	0.33388	209	3102	2905.8	0.196977	220			0			212	6193.2
2019-05-22	3876.5	3108.9	0.221798	219	4736	4642.5	0.320137	210	2041	2488.5	0.168689	221			0			213	5323.2
2019-05-23	1420.5	2648.5	0.188952	220	3290	4280	0.29514	211	2041	2150.6	0.145784	222			0			214	5501.5
2019-05-24	1420.5	2239.17	0.159749	221					1784.5	1909.6	0.129447	223			0			215	4266
2019-05-25									1784.5	1875.1	0.127108	224			0			216	3340
2019-05-26									1897	1840.6	0.12477	225			0			217	4590.1
2019-05-27									1868.5	1780.5	0.120695	226			0			218	3854.6
2019-05-28									1868.5	1720.4	0.116621	227			0			219	3668.6
2019-05-29									1484	1556.2	0.105491	228			0			220	1910.1
2019-05-30									1484	1478.12	0.100198	229			0			221	1910.1
2019-05-31									1076	1348	0.0913774	230			0			222	1529.1
2020-05-31															0			223	1529.1
																		224	1641.6
																		225	1613.1
																		226	1613.1
																		227	1228.6
																		228	1228.6
																		229	820.6

## Sheet: Alignment
		Means				By days from peak
		Term	Fitted Mean	SE Mean		Means
		day				Term	Fitted Mean	SE Mean
		20	1258	713		Year
	-67	21	1392	713		2018	8892.1	43.7
	-66	22	1392	713		2019	9864.8	43.8
	-65	23	1517	713		2020	9761.6	42.4
	-64	24	1517	713		Days from peak
	-63	25	1098	504		-87	1238	742
	-62	26	1098	504		-86	1371	742
	-61	27	1138	411		-85	1371	742
	-60	28	1294	411		-84	940	524
	-59	29	1654	411		-83	1175	524
	-58	30	1923	411		-82	1017	428
	-57	31	2340	411		-81	1286	428
	-56	32	2599	411		-80	1564	428
	-55	33	3041	411		-79	1823	428
	-54	34	3740	411		-78	2183	428
	-53	35	3571	411		-77	2054	524
	-52	36	3571	411		-76	2769	428
	-51	37	4400	411		-75	2769	428
	-50	38	4641	411		-74	3709	428
	-49	39	5160	411		-73	3949	428
	-48	40	5385	411		-72	4310	428
	-47	41	5780	411		-71	4536	428
	-46	42	6014	411		-70	4867	428
	-45	43	6306	411		-69	4379	524
	-44	44	6567	411		-68	5620	428
	-43	45	6792	411		-67	5736	428
	-42	46	7121	411		-66	6131	428
	-41	47	7135	411		-65	6269	428
	-40	48	7464	411		-64	6609	428
	-39	49	7457	411		-63	7983	524
	-38	50	7536	411		-62	7140	428		SUMMARY OUTPUT
	-37	51	7978	411		-61	7406	428
	-36	52	8204	411		-60	7466	428		Regression Statistics
	-35	53	8559	411		-59	8618	524		Multiple R	0.996303
	-34	54	8653	411		-58	8946	524		R Square	0.99262
	-33	55	9010	411		-57	8926	524		Adjusted R Square	0.992597
	-32	56	8967	411		-56	8293	428		Standard Error	295.378
	-31	57	9242	411		-55	9415	524		Observations	317
	-30	58	9150	411		-54	8678	428
	-29	59	9539	411		-53	8828	428		ANOVA
	-28	60	9480	411		-52	9257	428			df	SS	MS	F	Significance F
	-27	61	9921	411		-51	9118	428		Regression	1	3.69665e+09	3.69665e+09	42369.3	0
	-26	62	10053	411		-50	9632	428		Residual	315	2.74832e+07	87248.1
	-25	63	10085	411		-49	9466	428		Total	316	3.72413e+09
	-24	64	10384	411		-48	9846	428
	-23	65	10475	411		-47	9809	428			Coefficients	Standard Error	t Stat	P-value	Lower 95%	Upper 95%	Lower 95.0%	Upper 95.0%
	-22	66	9748	411		-46	10127	428		Intercept	92.2777	48.6504	1.89675	0.0587754	-3.44312	187.999	-3.44312	187.999
	-21	67	10400	411		-45	9640	428		X Variable 1	0.991788	0.00481829	205.838	0	0.982308	1.00127	0.982308	1.00127
	-20	68	10582	411		-44	10144	428
	-19	69	10747	411		-43	10481	428
	-18	70	11016	411		-42	10479	428
	-17	71	11190	411		-41	10582	428		PROBABILITY OUTPUT
	-16	72	11171	411		-40	10469	428
	-15	73	11252	411		-39	10705	428		Percentile	Y
	-14	74	11443	411		-38	10879	428		0.157729	821
	-13	75	11478	411		-37	10865	428		0.473186	940
	-12	76	11747	411		-36	11287	428		0.788644	1017
	-11	77	11606	411		-35	11355	428		1.1041	1175
	-10	78	11810	411		-34	11384	428		1.41956	1229
	-9	79	12148	411		-33	11704	428		1.73502	1229
	-8	80	12292	411		-32	11767	428		2.05047	1238
	-7	81	12539	411		-31	11946	428		2.36593	1286
	-6	82	12644	411		-30	11896	428		2.68139	1371
	-5	83	12781	411		-29	12196	428		2.99685	1371
	-4	84	13083	411		-28	12356	428		3.3123	1529
	-3	85	13105	411		-27	12601	428		3.62776	1529
	-2	86	13500	411		-26	12778	428		3.94322	1564
	-1	87	13428	411		-25	12950	428		4.25868	1613
	0	88	13337	411		-24	13069	428		4.57413	1613
	1	89	13261	411		-23	13085	428		4.88959	1642
	2	90	13348	411		-22	13219	428		5.20505	1823
	3	91	13341	411		-21	13435	428		5.5205	1910
	4	92	13456	411		-20	12971	428		5.83596	1910
	5	93	13239	411		-19	13445	428		6.15142	2054
	6	94	13465	411		-18	13212	428		6.46688	2183
	7	95	13337	411		-17	13792	524		6.78233	2769
	8	96	13454	411		-16	13417	428		7.09779	2769
	9	97	13629	411		-15	13354	428		7.41325	3340
	10	98	13803	411		-14	13196	428		7.72871	3669
	11	99	13791	411		-13	13473	428		8.04416	3709
	12	100	13952	411		-12	13141	428		8.35962	3855
	13	101	14092	411		-11	13499	524		8.67508	3949
	14	102	14014	411		-10	13701	428		8.99054	4266
	15	103	14161	411		-9	13887	428		9.30599	4310
	16	104	14184	411		-8	13628	428		9.62145	4379
	17	105	14303	411		-7	14024	428		9.93691	4536
	18	106	14471	411		-6	14053	428		10.2524	4590
	19	107	14495	411		-5	14093	428		10.5678	4867
	20	108	14267	411		-4	14208	428		10.8833	5323
	21	109	14321	411		-3	14271	428		11.1987	5459
	22	110	14035	411		-2	14362	428		11.5142	5502
	23	111	14284	411		-1	14220	428		11.8297	5620
	24	112	14141	411		0	14660	428		12.1451	5736
	25	113	14150	411		1	13811	428		12.4606	5948
	26	114	14193	411		2	14154	428		12.776	6131
	27	115	14174	411		3	14296	428		13.0915	6193
	28	116	13913	411		4	14222	428		13.4069	6238
	29	117	13883	411		5	14131	428		13.7224	6269
	30	118	13799	411		6	14282	428		14.0379	6426
	31	119	14158	411		7	14164	428		14.3533	6579
	32	120	13891	411		8	14120	428		14.6688	6609
	33	121	13872	411		9	14058	428		14.9842	6642
	34	122	13729	411		10	13928	428		15.2997	6663
	35	123	13674	411		11	13716	428		15.6151	6663
	36	124	13832	411		12	13883	428		15.9306	6705
	37	125	13674	411		13	13557	428		16.2461	6777
	38	126	13552	411		14	13723	428		16.5615	6861
	39	127	13986	411		15	13586	428		16.877	7020
	40	128	13905	411		16	13963	428		17.1924	7140
	41	129	13833	411		17	14057	428		17.5079	7220
	42	130	13772	411		18	13750	428		17.8233	7221
	43	131	13644	411		19	13660	428		18.1388	7255
	44	132	13452	411		20	13826	428		18.4543	7267
	45	133	13434	411		21	13844	428		18.7697	7275
	46	134	13160	411		22	13645	428		19.0852	7292
	47	135	13595	411		23	13643	428		19.4006	7346
	48	136	13318	411		24	13647	428		19.7161	7377
	49	137	13150	411		25	13470	428		20.0315	7401
	50	138	13306	411		26	13504	428		20.347	7406
	51	139	12973	411		27	13146	428		20.6625	7442
	52	140	12603	411		28	13458	428		20.9779	7466
	53	141	12905	411		29	13061	428		21.2934	7494
	54	142	12690	411		30	13083	428		21.6088	7572
	55	143	12993	411		31	13109	428		21.9243	7592
	56	144	12600	411		32	12785	428		22.2397	7593
	57	145	12742	411		33	12335	428		22.5552	7608
	58	146	12928	411		34	12793	428		22.8707	7615
	59	147	12816	411		35	12736	428		23.1861	7617
	60	148	12857	411		36	13259	428		23.5016	7625
	61	149	12862	411		37	12976	428		23.817	7627
	62	150	12584	411		38	12970	428		24.1325	7630
	63	151	12422	411		39	12916	428		24.4479	7631
	64	152	12659	411		40	12712	428		24.7634	7636
	65	153	12435	411		41	12801	428		25.0789	7649
	66	154	11950	411		42	12632	428		25.3943	7659
	67	155	12243	411		43	12311	428		25.7098	7660
	68	156	12455	411		44	12330	428		26.0252	7665
	69	157	11503	411		45	12513	428		26.3407	7687
	70	158	11905	411		46	12365	428		26.6562	7694
	71	159	11990	411		47	12039	428		26.9716	7703
	72	160	12152	411		48	12074	428		27.2871	7704
	73	161	12048	411		49	12444	428		27.6025	7711
	74	162	12317	411		50	11845	524		27.918	7715
	75	163	12290	411		51	12096	428		28.2334	7723
	76	164	12107	411		52	11999	428		28.5489	7725
	77	165	12311	411		53	12140	428		28.8644	7736
	78	166	12007	411		54	12050	428		29.1798	7738
	79	167	11935	411		55	12218	428		29.4953	7738
	80	168	11752	411		56	12337	428		29.8107	7774
	81	169	11838	411		57	12025	428		30.1262	7779
	82	170	11973	411		58	12254	428		30.4416	7780
	83	171	11953	411		59	12006	428		30.7571	7786
	84	172	12157	411		60	11855	428		31.0726	7798
	85	173	11923	411		61	11763	428		31.388	7817
	86	174	12163	411		62	11797	428		31.7035	7822
	87	175	12209	411		63	11886	428		32.0189	7853
	88	176	11822	411		64	11929	428		32.3344	7861
	89	177	12089	411		65	12125	428		32.6498	7863
	90	178	12077	411		66	11998	428		32.9653	7878
	91	179	11910	411		67	12038	428		33.2808	7882
	92	180	11768	411		68	12447	428		33.5962	7897
	93	181	11626	411		69	11762	428		33.9117	7923
	94	182	11902	411		70	11943	428		34.2271	7956
	95	183	11591	411		71	12010	428		34.5426	7976
	96	184	11963	411		72	11492	428		34.858	7981
	97	185	12160	411		73	11729	428		35.1735	7983
	98	186	11795	411		74	11733	428		35.489	8005
	99	187	11896	411		75	12030	428		35.8044	8064
	100	188	11407	411		76	11707	428		36.1199	8083
	101	189	11771	411		77	11968	428		36.4353	8094
	102	190	11698	411		78	11988	428		36.7508	8118
	103	191	11763	411		79	11656	428		37.0662	8174
	104	192	11708	411		80	12049	428		37.3817	8176
	105	193	11689	411		81	11578	428		37.6972	8188
	106	194	11408	411		82	11872	428		38.0126	8292
	107	195	11528	411		83	11795	428		38.3281	8293
	108	196	11395	411		84	11667	428		38.6435	8303
	109	197	11199	411		85	11508	428		38.959	8491
	110	198	11034	411		86	11598	428		39.2744	8546
	111	199	10901	411		87	11172	428		39.5899	8618
	112	200	10256	411		88	11161	428		39.9054	8636
	113	201	11128	411		89	10634	428		40.2208	8651
	114	202	10861	411		90	11467	524		40.5363	8678
	115	203	11021	411		91	10773	428		40.8517	8696
	116	204	10923	411		92	10804	428		41.1672	8828
	117	205	10733	411		93	10531	428		41.4826	8828
	118	206	10786	411		94	10785	428		41.7981	8876
	119	207	10633	411		95	10756	428		42.1136	8895
	120	208	10742	411		96	10711	428		42.429	8926
	121	209	10636	411		97	10646	428		42.7445	8945
	122	210	10210	411		98	10562	428		43.0599	8946
	123	211	10252	411		99	10443	428		43.3754	8961
	124	212	10085	411		100	10536	428		43.6909	8987
	125	213	9729	411		101	10635	428		44.0063	9017
	126	214	9929	411		102	10465	428		44.3218	9029
	127	215	9858	411		103	10183	428		44.6372	9100
	128	216	9994	411		104	10141	428		44.9527	9102
	129	217	9857	411		105	9952	428		45.2681	9114
	130	218	9703	411		106	9643	428		45.5836	9118
	131	219	9775	411		107	9868	428		45.8991	9157
	132	220	9744	411		108	9721	428		46.2145	9253
	133	221	9356	411		109	10088	428		46.53	9256
	134	222	9426	411		110	9773	428		46.8454	9257
	135	223	9416	411		111	9572	428		47.1609	9313
	136	224	9337	411		112	9612	428		47.4763	9366
	137	225	9238	411		113	9557	428		47.7918	9415
	138	226	9126	411		114	9102	428		48.1073	9441
	139	227	9243	411		115	9114	428		48.4227	9466
	140	228	9259	411		116	9253	428		48.7382	9557
	141	229	9084	411		117	9157	428		49.0536	9572
	142	230	9317	411		118	9313	428		49.3691	9612
	143	231	9322	411		119	9441	428		49.6845	9632
	144	232	9111	411		120	9366	428		50	9640
	145	233	8736	411		121	9256	428		50.3155	9643
	146	234	8601	411		122	8987	428		50.6309	9721
	147	235	8722	411		123	9017	428		50.9464	9773
	148	236	8881	411		124	9100	428		51.2618	9809
	149	237	8800	411		125	8895	428		51.5773	9846
	150	238	8826	411		126	8651	428		51.8927	9868
	151	239	8752	411		127	8491	428		52.2082	9952
	152	240	8914	411		128	8636	428		52.5237	10088
	153	241	8705	411		129	8828	428		52.8391	10127
	154	242	8561	411		130	8876	428		53.1546	10141
	155	243	8493	411		131	8945	428		53.47	10144
	156	244	8188	411		132	8961	428		53.7855	10183
	157	245	8245	411		133	9029	428		54.1009	10443
	158	246	8355	411		134	8696	428		54.4164	10465
	159	247	8109	411		135	8546	428		54.7319	10469
	160	248	8109	411		136	8292	428		55.0473	10479
	161	249	8224	411		137	8118	428		55.3628	10481
	162	250	8166	411		138	8176	428		55.6782	10531
	163	251	8117	411		139	8303	428		55.9937	10536
	164	252	7892	411		140	8174	428		56.3091	10562
	165	253	8136	411		141	8083	428		56.6246	10582
	166	254	8035	411		142	8188	428		56.9401	10634
	167	255	8048	411		143	8094	428		57.2555	10635
	168	256	7981	411		144	8064	428		57.571	10646
	169	257	7885	411		145	7897	428		57.8864	10705
	170	258	7689	411		146	8005	428		58.2019	10711
	171	259	7987	411		147	7863	428		58.5174	10756
	172	260	7899	411		148	7981	428		58.8328	10773
	173	261	7859	411		149	7878	428		59.1483	10785
	174	262	7866	411		150	7861	428		59.4637	10804
	175	263	7728	411		151	7659	428		59.7792	10865
	176	264	7723	411		152	7956	428		60.0946	10879
	177	265	7743	411		153	7711	428		60.4101	11161
	178	266	7685	411		154	7786	428		60.7256	11172
	179	267	7610	411		155	7882	428		61.041	11287
	180	268	7559	411		156	7617	428		61.3565	11355
	181	269	7546	411		157	7779	428		61.6719	11384
	182	270	7312	411		158	7715	428		61.9874	11467
	183	271	7533	411		159	7738	428		62.3028	11492
	184	272	7302	411		160	7660	428		62.6183	11508
	185	273	7553	411		161	7649	428		62.9338	11578
	186	274	7439	411		162	7615	428		63.2492	11598
	187	275	7420	411		163	7221	428		63.5647	11656
	188	276	7611	411		164	7442	428		63.8801	11667
	189	277	7552	411		165	7377	428		64.1956	11704
	190	278	7807	411		166	7627	428		64.511	11707
	191	279	7899	411		167	7723	428		64.8265	11729
	192	280	7552	411		168	7704	428		65.142	11733
	193	281	7890	411		169	7631	428		65.4574	11762
	194	282	7741	411		170	7725	428		65.7729	11763
	195	283	7671	411		171	7853	428		66.0883	11767
	196	284	7621	411		172	7923	428		66.4038	11795
	197	285	7756	411		173	7738	428		66.7192	11797
	198	286	7770	411		174	7976	428		67.0347	11845
	199	287	7806	411		175	7703	428		67.3502	11855
	200	288	7746	411		176	7694	428		67.6656	11872
	201	289	7877	411		177	7630	428		67.9811	11886
	202	290	7614	411		178	7736	428		68.2965	11896
	203	291	7760	411		179	7780	428		68.612	11929
	204	292	7739	411		180	7798	428		68.9274	11943
	205	293	7672	411		181	7774	428		69.2429	11946
	206	294	7589	411		182	7822	428		69.5584	11968
	207	295	7690	411		183	7608	428		69.8738	11988
	208	296	7575	411		184	7817	428		70.1893	11998
	209	297	7550	411		185	7665	428		70.5047	11999
	210	298	7438	411		186	7687	428		70.8202	12006
	211	299	7362	411		187	7636	428		71.1356	12010
	212	300	7649	411		188	7572	428		71.4511	12025
	213	301	7818	411		189	7593	428		71.7666	12030
	214	302	7326	411		190	7592	428		72.082	12038
	215	303	7371	411		191	7401	428		72.3975	12039
	216	304	7211	411		192	7346	428		72.7129	12049
	217	305	7189	411		193	7494	428		73.0284	12050
	218	306	6816	411		194	7625	428		73.3438	12074
	219	307	6741	411		195	7220	428		73.6593	12096
	220	308	6739	411		196	7275	428		73.9748	12125
	221	309	6853	411		197	7267	428		74.2902	12140
	222	310	6771	411		198	7292	428		74.6057	12196
	223	311	7249	411		199	6705	428		74.9211	12218
	224	312	6894	411		200	6663	428		75.2366	12254
	225	313	6151	411		201	6579	428		75.5521	12311
	226	314	6369	411		202	6642	428		75.8675	12330
	227	315	7303	411		203	6777	428		76.183	12335
	228	316	6147	411		204	6663	524		76.4984	12337
	229	317	6989	411		205	7020	428		76.8139	12356
	230	318	5915	411		206	6238	428		77.1293	12365
	231	319	6835	411		207	6426	428		77.4448	12444
	232	320	5779	411		208	7255	428		77.7603	12447
	233	321	6306	411		209	5948	428		78.0757	12513
	234	322	5403	411		210	6861	428		78.3912	12601
	235	323	4864	411		211	5459	428		78.7066	12632
	236	324	4850	411		212	6193	428		79.0221	12712
	237	325	4055	411		213	5323	428		79.3375	12736
	238	326	3905	411		214	5502	428		79.653	12778
	239	327	2250	411		215	4266	524		79.9685	12785
	240	328	1911	504		216	3340	524		80.2839	12793
	241	329	1509	713		217	4590	524		80.5994	12801
	242	330	1509	713		218	3855	524		80.9148	12916
	243	331	1622	713		219	3669	524		81.2303	12950
	244	332	1593	713		220	1910	524		81.5457	12970
		333	1593	713		221	1910	524		81.8612	12971
		334	1209	713		222	1529	742		82.1767	12976
		335	1209	713		223	1529	742		82.4921	13061
		336	801	713		224	1642	742		82.8076	13069
		Year				225	1613	742		83.123	13083
		1	8857.1	41		226	1613	742		83.4385	13085
		2	9851.5	42		227	1229	742		83.7539	13109
		3	9766.9	40.6		228	1229	742		84.0694	13141
						229	821	742		84.3849	13146
										84.7003	13196
										85.0158	13212
										85.3312	13219
										85.6467	13259
										85.9621	13354
										86.2776	13417
										86.5931	13435
										86.9085	13445
										87.224	13458
										87.5394	13470
										87.8549	13473
										88.1703	13499
										88.4858	13504
										88.8013	13557
										89.1167	13586
										89.4322	13628
										89.7476	13643
										90.0631	13645
										90.3785	13647
										90.694	13660
										91.0095	13701
										91.3249	13716
										91.6404	13723
										91.9558	13750
										92.2713	13792
										92.5868	13811
										92.9022	13826
										93.2177	13844
										93.5331	13883
										93.8486	13887
										94.164	13928
										94.4795	13963
										94.795	14024
										95.1104	14053
										95.4259	14057
										95.7413	14058
										96.0568	14093
										96.3722	14120
										96.6877	14131
										97.0032	14154
										97.3186	14164
										97.6341	14208
										97.9495	14220
										98.265	14222
										98.5804	14271
										98.8959	14282
										99.2114	14296
										99.5268	14362
										99.8423	14660

## Sheet: MS per Cow
Date	Tatua 78306 2021/22 KgMS/Cow	Tatua 78306 2020/21 KgMS/Cow	Tatua 78306 2019/20 KgMS/Cow	Tatua 78306 2018/19 KgMS/Cow		Means
2018-07-20				0.09		Term	Fitted Mean
2018-07-21				0.11		Year
2018-07-22				0.11		2018	1.33849
2018-07-23				0.13		2019	1.52658
2018-07-24		0.12		0.13		2020	1.46087
2018-07-25	0.17	0.12		0.16		Days from peak
2018-07-26	0.17	0.21	0.06	0.16		-84	-0.0246
2018-07-27	0.28	0.21	0.06	0.2		-83	0.1054
2018-07-28	0.28	0.34	0.19	0.2		-82	0.10325
2018-07-29	0.41	0.34	0.19	0.25		-81	0.16325
2018-07-30	0.41	0.5	0.31	0.25		-80	0.20825
2018-07-31	0.49	0.5	0.31	0.28		-79	0.27325
2018-08-01	0.61	0.65	0.44	0.28		-78	0.33825
2018-08-02	0.61	0.65	0.44	0.34		-77	0.32111
2018-08-03	0.71	0.76	0.77	0.34		-76	0.41825
2018-08-04	0.8	0.76	0.44	0.39		-75	0.41825
2018-08-05	0.8	0.88	0.44	0.39		-74	0.63825
2018-08-06	0.88	0.88	0.73	0.42		-73	0.61
2018-08-07	0.88	1	0.84	0.42		-72	0.66333
2018-08-08	1	1	0.84	0.5		-71	0.69333
2018-08-09	1	1.11	0.93	0.5		-70	0.74333
2018-08-10	1.09	1.11	0.93	0.58		-69	0.90325
2018-08-11	1.09	1.13	1.03	0.58		-68	0.96325
2018-08-12	1.13	1.12	1.03	0.66		-67	0.99325
2018-08-13	1.2	1.18	1.09	0.66		-66	1.05325
2018-08-14	1.23	1.26	1.1	0.77		-65	1.06325
2018-08-15	1.26	1.22	1.12	0.77		-64	0.98
2018-08-16	1.29	1.25	1.15	0.79		-63	1.00333
2018-08-17	1.32	1.26	1.23	0.79		-62	1.06
2018-08-18	1.38	1.27	1.23	0.76		-61	1.09667
2018-08-19	1.35	1.28	1.26	0.76		-60	1.10333
2018-08-20	1.42	1.33	1.3	0.88		-59	1.11667
2018-08-21	1.49	1.35	1.31	0.88		-58	1.25325
2018-08-22	1.49	1.42	1.35	0.98		-57	1.27825
2018-08-23	1.46	1.41	1.39	0.98		-56	1.19333
2018-08-24	1.48	1.41	1.42	1.08		-55	1.35325
2018-08-25	1.45	1.41	1.48	1.08		-54	1.27333
2018-08-26	1.51	1.37	1.49	1.14		-53	1.29
2018-08-27	1.54	1.38	1.47	1.14		-52	1.34333
2018-08-28	1.53	1.39	1.54	1.17		-51	1.33
2018-08-29	1.58	1.43	1.5	1.12		-50	1.38333
2018-08-30	1.51	1.43	1.6	1.21		-49	1.36
2018-08-31	1.57	1.44	1.57	1.23		-48	1.38
2018-09-01	1.57	1.47	1.59	1.2		-47	1.38333
2018-09-02	1.64	1.47	1.64	1.26		-46	1.42667
2018-09-03	1.63	1.44	1.64	1.28		-45	1.34333
2018-09-04	1.66	1.49	1.37	1.27		-44	1.42
2018-09-05	1.64	1.51	1.62	1.25		-43	1.45667
2018-09-06	1.63	1.53	1.64	1.27		-42	1.46333
2018-09-07	1.68	1.56	1.64	1.32		-41	1.47333
2018-09-08	1.63	1.62	1.71	1.29		-40	1.47
2018-09-09	1.67	1.61	1.67	1.4		-39	1.49667
2018-09-10	1.65	1.65	1.71	1.39		-38	1.52333
2018-09-11	1.65	1.67	1.72	1.39		-37	1.50667
2018-09-12	1.64	1.66	1.67	1.42		-36	1.56667
2018-09-13	1.71	1.68	1.68	1.43		-35	1.58667
2018-09-14	1.7	1.7	1.76	1.46		-34	1.6
2018-09-15	1.75	1.7	1.76	1.41		-33	1.62
2018-09-16	1.74	1.71	1.77	1.48		-32	1.64
2018-09-17	1.76	1.75	1.83	1.5		-31	1.66333
2018-09-18	1.76	1.78	1.85	1.58		-30	1.66667
2018-09-19	1.8	1.8	1.89	1.61		-29	1.70667
2018-09-20	1.83	1.8	1.94	1.57		-28	1.71667
2018-09-21	1.88	1.8	1.94	1.61		-27	1.78
2018-09-22	1.89	1.82	2.01	1.69		-26	1.80333
2018-09-23	1.945	1.86	2.02	1.67		-25	1.80667
2018-09-24	2	1.88	2.05	1.71		-24	1.84333
2018-09-25	1.97	1.9	2.12	1.61		-23	1.83667
2018-09-26	1.94	1.87	2.02	1.82		-22	1.86333
2018-09-27	1.99	1.7	2.1	1.76		-21	1.89
2018-09-28	2.01	1.87	2.1	1.91		-20	1.83
2018-09-29	1.93	1.85	2	1.81		-19	1.92333
2018-09-30	1.97	1.86	2.05	1.82		-18	1.88667
2018-10-01	2.01	1.9	2.03	1.79		-17	1.9254
2018-10-02	2.01	1.9	2.01	1.75		-16	1.89667
2018-10-03	1.92	1.95	2.01	1.75		-15	1.9
2018-10-04	1.96	1.97	2.03	1.43		-14	1.88333
2018-10-05	1.86	2.02	2	1.73		-13	1.88333
2018-10-06	2.04	2.03	2	1.79		-12	1.89
2018-10-07	1.97	1.99	2.02	1.63		-11	1.90325
2018-10-08	2.01	2.11	1.96	1.84		-10	1.91667
2018-10-09	1.98	2.03	2.05	1.8		-9	1.94
2018-10-10	2.05	2.07	2.01	1.81		-8	1.88667
2018-10-11	1.97	2.07	2	1.87		-7	1.95333
2018-10-12	2	2.06	2.03	1.9		-6	1.95667
2018-10-13	2.02	2.09	1.96	1.96		-5	1.98
2018-10-14	1.97	2.1	2.1	1.99		-4	2
2018-10-15	1.97	2.04	2.06	1.99		-3	2.02
2018-10-16	2.02	2.17	2.09	1.8		-2	2.03
2018-10-17	2	2.09	2.07	1.89		-1	2.02333
2018-10-18	2.05	2.08	1.99	1.92		0	2.06333
2018-10-19	2.06	2.09	2.1	1.87		1	1.97333
2018-10-20	1.99	2.06	2.08	1.85		2	2.03
2018-10-21	2.11	2.06	2.03	1.92		3	2.03667
2018-10-22	2.02	2.03	2.1	1.9		4	2.02
2018-10-23	2.03	2.06	2.11	1.93		5	2.00333
2018-10-24	2.02	2.06	2.07	1.86		6	2.03
2018-10-25	1.99	2.02	2.11	1.8		7	2.01333
2018-10-26	1.97	2.07	2.08	1.8		8	2.02
2018-10-27	2.02	1.97	2.1	1.81		9	2.01333
2018-10-28	1.97	1.94	2.12	1.82		10	1.98333
2018-10-29	1.97	1.95	2.09	1.84		11	1.96667
2018-10-30	1.99	1.96	2.08	1.84		12	1.95667
2018-10-31	1.92	1.98	1.99	1.84		13	1.92667
2018-11-01	1.9	1.9	1.99	1.91		14	1.92333
2018-11-02	1.94	1.88	1.99	1.89		15	1.94
2018-11-03	1.97	1.95	2.03	1.85		16	1.95333
2018-11-04	1.98	1.95	2.06	1.82		17	1.97667
2018-11-05	1.97	1.92	2.04	1.85		18	1.95
2018-11-06	1.93	1.92	2.06	1.86		19	1.92333
2018-11-07	1.92	1.98	2.04	1.87		20	1.93
2018-11-08	1.95	1.89	2.02	1.79		21	1.94
2018-11-09	1.98	1.94	2.02	1.77		22	1.92
2018-11-10	1.95	1.91	1.98	1.78		23	1.91667
2018-11-11	1.92	1.94	1.96	1.75		24	1.93
2018-11-12	1.93	1.87	2.02	1.82		25	1.90333
2018-11-13	1.99	1.85	2.05	1.77		26	1.90333
2018-11-14	1.87	1.82	1.99	1.75		27	1.89333
2018-11-15	1.87	1.84	2.02	1.83		28	1.91333
2018-11-16	1.89	1.79	1.98	1.71		29	1.85667
2018-11-17	1.84	1.84	1.93	1.66		30	1.84667
2018-11-18	1.81	1.85	1.94	1.66		31	1.86
2018-11-19	1.83	1.88	1.93	1.74		32	1.82667
2018-11-20	1.81	1.85	1.93	1.8		33	1.75
2018-11-21		1.82	1.8	1.76		34	1.81667
2018-11-22		1.87	1.95	1.76		35	1.84667
2018-11-23		1.82	1.95	1.75		36	1.88333
2018-11-24		1.86	1.97	1.68		37	1.85333
2018-11-25		1.81	1.95	1.72		38	1.86
2018-11-26		1.78	2	1.76		39	1.84667
2018-11-27		1.74	1.92	1.74		40	1.82
2018-11-28		1.72	1.96	1.67		41	1.83
2018-11-29		1.75	1.91	1.78		42	1.81667
2018-11-30		1.73	1.88	1.76		43	1.77
2018-12-01		1.74	1.79	1.67		44	1.76667
2018-12-02		1.7	1.89	1.68		45	1.80667
2018-12-03		1.66	1.92	1.8		46	1.79667
2018-12-04		1.68	1.88	1.5		47	1.75
2018-12-05		1.69	1.85	1.62		48	1.75333
2018-12-06		1.69	1.84	1.67		49	1.79333
2018-12-07		1.68	1.88	1.69		50	1.68
2018-12-08		1.66	1.88	1.69		51	1.74
2018-12-09		1.71	1.92	1.72		52	1.75667
2018-12-10		1.7	1.91	1.75		53	1.76667
2018-12-11		1.69	1.92	1.65		54	1.76333
2018-12-12		1.64	1.92	1.75		55	1.75667
2018-12-13		1.69	1.89	1.69		56	1.77667
2018-12-14		1.68	1.87	1.6		57	1.72667
2018-12-15		1.68	1.83	1.6		58	1.76333
2018-12-16		1.65	1.85	1.62		59	1.73
2018-12-17		1.73	1.86	1.62		60	1.71
2018-12-18		1.73	1.84	1.6		61	1.72667
2018-12-19		1.72	1.9	1.66		62	1.73333
2018-12-20		1.76	1.9	1.6		63	1.72
2018-12-21		1.78	1.89	1.64		64	1.75
2018-12-22		1.75	1.92	1.63		65	1.75667
2018-12-23		1.72	1.88	1.55		66	1.73
2018-12-24		1.72	1.87	1.61		67	1.74333
2018-12-25		1.63	1.83	1.71		68	1.79667
2018-12-26		1.62	1.98	1.63		69	1.71667
2018-12-27		1.68	1.85	1.58		70	1.71333
2018-12-28		1.77	1.81	1.6		71	1.75333
2018-12-29		1.68	1.83	1.6		72	1.7
2018-12-30		1.81	1.84	1.6		73	1.68667
2018-12-31		1.76	1.86	1.63		74	1.72
2019-01-01		1.74	1.88	1.62		75	1.74
2019-01-02		1.73	1.85	1.52		76	1.70667
2019-01-03		1.67	1.84	1.6		77	1.73667
2019-01-04		1.68	1.77	1.54		78	1.75
2019-01-05		1.68	1.87	1.65		79	1.70333
2019-01-06		1.62	1.85	1.62		80	1.74667
2019-01-07		1.65	1.91	1.6		81	1.70667
2019-01-08		1.64	1.91	1.57		82	1.73667
2019-01-09		1.65	1.88	1.63		83	1.71333
2019-01-10		1.63	1.84	1.49		84	1.7
2019-01-11		1.71	1.88	1.52		85	1.69
2019-01-12		1.75	1.85	1.46		86	1.69667
2019-01-13		1.68	1.82	1.4		87	1.63667
2019-01-14		1.67	1.77	1.44		88	1.62
2019-01-15		1.6	1.71	1.47		89	1.56667
2019-01-16		1.57	1.53	1.48		90	1.73325
2019-01-17		1.57	1.82	1.58		91	1.60333
2019-01-18		1.6	1.69	1.58		92	1.62
2019-01-19		1.69	1.72	1.6		93	1.57667
2019-01-20		1.67	1.65	1.59		94	1.58667
2019-01-21		1.64	1.61	1.56		95	1.58333
2019-01-22		1.68	1.6	1.58		96	1.58
2019-01-23		1.68	1.54	1.59		97	1.6
2019-01-24		1.69	1.52	1.64		98	1.58333
2019-01-25		1.66	1.52	1.58		99	1.56
2019-01-26		1.62	1.46	1.45		100	1.59333
2019-01-27		1.58	1.51	1.45		101	1.7023
2019-01-28		1.51	1.45	1.43		102	1.6773
2019-01-29		1.53	1.45	1.41		103	1.52
2019-01-30		1.52	1.45	1.39		104	1.51667
2019-01-31		1.54	1.48	1.46		105	1.47667
2019-02-01		1.55	1.42	1.57		106	1.44667
2019-02-02		1.55	1.42	1.44		107	1.45667
2019-02-03		1.57	1.45	1.42		108	1.48
2019-02-04		1.51	1.46	1.43		109	1.53333
2019-02-05		1.46	1.49	1.43		110	1.47
2019-02-06		1.45	1.42	1.44		111	1.45667
2019-02-07		1.5	1.4	1.42		112	1.44667
2019-02-08		1.45	1.34	1.41		113	1.44333
2019-02-09		1.42	1.39	1.39		114	1.40333
2019-02-10		1.53	1.31	1.42		115	1.37333
2019-02-11		1.48	1.25	1.41		116	1.41
2019-02-12		1.5	1.32	1.44		117	1.40333
2019-02-13		1.48	1.37	1.45		118	1.39667
2019-02-14		1.46	1.35	1.38		119	1.44667
2019-02-15		1.51	1.4	1.41		120	1.42667
2019-02-16		1.47	1.36	1.45		121	1.43667
2019-02-17		1.44	1.36	1.41		122	1.39667
2019-02-18		1.4	1.33	1.38		123	1.39333
2019-02-19		1.44	1.31	1.34		124	1.42
2019-02-20		1.46	1.3	1.37		125	1.4
2019-02-21		1.49	1.32	1.4		126	1.38667
2019-02-22		1.48	1.34	1.34		127	1.35
2019-02-23		1.48	1.31	1.37		128	1.38333
2019-02-24		1.54	1.34	1.38		129	1.39333
2019-02-25		1.34	1.32	1.43		130	1.4
2019-02-26		1.34	1.37	1.47		131	1.39667
2019-02-27		1.3	1.34	1.42		132	1.41
2019-02-28		1.25	1.37	1.39		133	1.42667
2019-03-01		1.3	1.31	1.33		134	1.39667
2019-03-02		1.32	1.38	1.31		135	1.37333
2019-03-03		1.3	1.36	1.36		136	1.33667
2019-03-04		1.31	1.32	1.34		137	1.29667
2019-03-05		1.32	1.31	1.29		138	1.32
2019-03-06		1.33	1.35	1.35		139	1.35
2019-03-07		1.34	1.37	1.33		140	1.34
2019-03-08		1.33	1.38	1.29		141	1.31
2019-03-09		1.41	1.33	1.22		142	1.34333
2019-03-10		1.39	1.36	1.29		143	1.34
2019-03-11		1.36	1.36	1.31		144	1.32333
2019-03-12		1.4	1.34	1.26		145	1.29667
2019-03-13		1.37	1.34	1.25		146	1.33667
2019-03-14		1.36	1.31	1.2		147	1.32333
2019-03-15		1.37	1.27	1.25		148	1.31
2019-03-16		1.35	1.31	1.26		149	1.32
2019-03-17		1.36	1.31	1.25		150	1.29
2019-03-18		1.37	1.3	1.25		151	1.30667
2019-03-19		1.36	1.31	1.23		152	1.31333
2019-03-20		1.42	1.31	1.16		153	1.28333
2019-03-21		1.4	1.25	1.23		154	1.29667
2019-03-22		1.38	1.28	1.23		155	1.29
2019-03-23		1.32	1.27	1.22		156	1.26
2019-03-24		1.37	1.26	1.21		157	1.29333
2019-03-25		1.35	1.23	1.15		158	1.30667
2019-03-26		1.2	1.29	1.15		159	1.30667
2019-03-27		1.33	1.32	1.16		160	1.28333
2019-03-28		1.17	1.32	1.22		161	1.27333
2019-03-29		1.27	1.3	1.19		162	1.26667
2019-03-30		1.23	1.3	1.21		163	1.21
2019-03-31		1.27	1.27	1.26		164	1.27333
2019-04-01		1.25	1.27	1.26		165	1.23
2019-04-02		1.26	1.33	1.26		166	1.27
2019-04-03		1.29	1.33	1.25		167	1.29333
2019-04-04		1.32	1.39	1.31		168	1.30667
2019-04-05		1.27	1.39	1.34		169	1.28667
2019-04-06		1.27	1.35	1.27		170	1.31667
2019-04-07		1.27	1.44	1.34		171	1.34333
2019-04-08		1.3	1.43	1.29		172	1.35333
2019-04-09		1.29	1.4	1.23		173	1.32333
2019-04-10		1.3	1.43	1.19		174	1.35333
2019-04-11		1.3	1.45	1.21		175	1.32333
2019-04-12		1.29	1.41	1.28		176	1.31
2019-04-13		1.27	1.4	1.27		177	1.30667
2019-04-14		1.28	1.44	1.28		178	1.31667
2019-04-15		1.19	1.44	1.29		179	1.33
2019-04-16		1.31	1.41	1.33		180	1.32667
2019-04-17		1.27	1.42	1.31		181	1.33333
2019-04-18		1.27	1.45	1.25		182	1.33
2019-04-19		1.24	1.42	1.28		183	1.30667
2019-04-20		1.27	1.4	1.31		184	1.35
2019-04-21		1.29	1.43	1.27		185	1.30333
2019-04-22		1.29	1.39	1.28		186	1.32333
2019-04-23		1.25	1.42	1.19		187	1.32
2019-04-24		1.28	1.41	1.21		188	1.3
2019-04-25		1.29	1.36	1.11		189	1.32333
2019-04-26		1.32	1.4	1.17		190	1.30667
2019-04-27		1.25	1.44	1.24		191	1.28
2019-04-28		1.31	1.38	1.13		192	1.24333
2019-04-29		1.28	1.34	1.14		193	1.25667
2019-04-30		1.27	1.31	1.14		194	1.29667
2019-05-01		1.34	1.33	1.17		195	1.23667
2019-05-02		1.24	1.33	0.87		196	1.25667
2019-05-03		1.27	1.32	0.96		197	1.25
2019-05-04		1.3	1.33	0.93		198	1.27333
2019-05-05		1.31	1.38	0.89		199	1.17
2019-05-06		1.54	1.3	1		200	1.17
2019-05-07		1.49	1.31	0.98		201	1.17
2019-05-08		0.95	1.31	0.96		202	1.16333
2019-05-09		1.07	1.3	0.97		203	1.20333
2019-05-10		1.55	1.3	0.99		204	1.17445
2019-05-11		0.92	1.35	1.01		205	1.26333
2019-05-12		1.41	1.34	0.93		206	1.09
2019-05-13		0.93	1.35	0.96		207	1.12667
2019-05-14		1.42	1.32	0.89		208	1.16945
2019-05-15		0.83	1.31	0.95		209	1.03
2019-05-16		1.04	1.24	0.95		210	1.21
2019-05-17		0.83	1.26	1.02		211	0.96667
2019-05-18		0.78	1.08	1.02		212	1.01945
2019-05-19		0.79	1.07	0.91		213	0.95333
2019-05-20		0.72	1.08	0.91		214	0.99333
2019-05-21		0.62	0.92	0.69		215	0.93
2019-05-22		0.38	0.94	0.69		216	0.66825
2019-05-23		0.38	0.66	0.26		217	0.8923
2019-05-24		0.35		0.26		218	0.7473
2019-05-25		0.35				219	0.6973
2019-05-26		0.38				220	0.3623
2019-05-27		0.36				221	0.3623
2019-05-28		0.36				222	0.33111
2019-05-29		0.31				223	0.33111
2019-05-30		0.31				224	0.36111
2019-05-31		0.23				225	0.34111
2020-05-31						226	0.34111
						227	0.29111
						228	0.29111
						229	0.21111

## Sheet: Milk fat per cow
Date	Tatua 78306 2021/22 Fat (kg)	Cows	Fat/cow Kg	Days from peak	Tatua 78306 2020/21 Fat (kg)	Cows	Fat/cow Kg	Tatua 78306 2019/20 Fat (kg)	Cows	Fat/cow Kg	Tatua 78306 2018/19 Fat (kg)	Cows	Fat/cow Kg		Means
2018-07-19											31.35				Term	Fitted Mean
2018-07-20											31.35	617.222	0.0507921		Year
2018-07-21											33.9	588.182	0.0576352		2018	0.74025
2018-07-22											33.9	588.182	0.0576352		2019	0.85987
2018-07-23											43.65	605.769	0.0720571		2020	0.81486
2018-07-24					38	587.917	0.064635				43.65	605.769	0.0720571		Days from peak
2018-07-25	53.8	590	0.0911864	-88	38	587.917	0.064635				51.8	597.812	0.0866492		-87	0
2018-07-26	53.8	590	0.0911864	-87	68	596.905	0.113921	18.4	563.333	0.0326627	51.8	597.812	0.0866492		-84	-0.02221
2018-07-27	86.95	590	0.147373	-86	68	596.905	0.113921	18.4	563.333	0.0326627	65.2	601.75	0.108351		-83	-0.02221
2018-07-28	86.95	590	0.147373	-85	108.75	585.588	0.185711	59.7	582.368	0.102512	65.2	601.75	0.108351		-82	0.0512
2018-07-29	128.25	590	0.217373	-84	108.75	585.588	0.185711	59.7	582.368	0.102512	81.2	592.6	0.137023		-81	0.0512
2018-07-30	128.25	590	0.217373	-83	160.2	592.4	0.270425	101.45	597.742	0.169722	81.2	592.6	0.137023		-80	0.10945
2018-07-31	154.9	590	0.262542	-82	160.2	592.4	0.270425	101.45	597.742	0.169722	95.3	598.036	0.159355		-79	0.10945
2018-08-01	192.1	590	0.325593	-81	212.75	587.692	0.362009	141.35	586.591	0.240969	95.3	598.036	0.159355		-78	0.18097
2018-08-02	192.1	590	0.325593	-80	212.75	587.692	0.362009	141.35	586.591	0.240969	110	582.206	0.188937		-77	0.18097
2018-08-03	222.4	590	0.376949	-79	255.5	593.092	0.430793	256.6	593.247	0.432535	110	582.206	0.188937		-76	0.31911
2018-08-04	253.1	590	0.428983	-78	255.5	593.092	0.430793	163.45	668.523	0.244494	129.25	593.846	0.217649		-75	0.22509
2018-08-05	253.1	590	0.428983	-77	291.1	590.909	0.492631	163.45	668.523	0.244494	129.25	593.846	0.217649		-74	0.27088
2018-08-06	286.5	590	0.485593	-76	291.1	590.909	0.492631	242.1	592.192	0.40882	143.9	589.167	0.244243		-73	0.35304
2018-08-07	286.5	590	0.485593	-75	333.9	590.65	0.565309	272.95	586.726	0.465208	143.9	589.167	0.244243		-72	0.41563
2018-08-08	324.3	590	0.549661	-74	333.9	590.65	0.565309	272.95	586.726	0.465208	161.4	589.4	0.273838		-71	0.41563
2018-08-09	324.3	590	0.549661	-73	373.4	591.441	0.631339	307.55	592.097	0.519425	161.4	589.4	0.273838		-70	0.41877
2018-08-10	354.3	590	0.600508	-72	373.4	591.441	0.631339	307.55	592.097	0.519425	188.75	594.138	0.317687		-69	0.41877
2018-08-11	354.3	590	0.600508	-71	376.8	588.938	0.639796	346.65	592.67	0.584896	188.75	594.138	0.317687		-68	0.47468
2018-08-12	369.1	590	0.625593	-70	356	590.268	0.603116	346.65	592.67	0.584896	216.05	588.03	0.367413		-67	0.47468
2018-08-13	378.8	590	0.642034	-69	393.4	589.407	0.667451	369.9	592.202	0.624618	216.05	588.03	0.367413		-66	0.52455
2018-08-14	388.6	590	0.658644	-68	421.4	591.984	0.711843	373	588.455	0.633864	258.2	589.416	0.438061		-65	0.52763
2018-08-15	401.8	590	0.681017	-67	407.5	590.328	0.690294	378.8	590.804	0.641161	258.2	589.416	0.438061		-64	0.54946
2018-08-16	414.3	590	0.702203	-66	412.1	589.12	0.699518	388.3	592.435	0.655431	270.8	589.367	0.459476		-63	0.54199
2018-08-17	426.3	590	0.722542	-65	409.5	590.873	0.693042	413.4	589.35	0.701451	270.8	589.367	0.459476		-62	0.60232
2018-08-18	445.3	590	0.754746	-64	417.4	590.787	0.706515	420	588.455	0.713733	258.1	590.132	0.43736		-61	0.62121
2018-08-19	446.2	590	0.756271	-63	413.4	587.969	0.703099	426.1	589.127	0.723274	258.1	590.132	0.43736		-60	0.62435
2018-08-20	472.2	590	0.800339	-62	439.7	588.346	0.74735	442.1	588	0.751871	294.45	591.989	0.497391		-59	0.63695
2018-08-21	483.7	590	0.819831	-61	451	589.926	0.764503	436.7	587.786	0.742957	294.45	591.989	0.497391		-58	0.62445
2018-08-22	481.7	590	0.816441	-60	475.8	588.944	0.807887	455.3	591.259	0.770051	321.25	588.52	0.54586		-57	0.63798
2018-08-23	477.1	590	0.808644	-59	471.5	590.355	0.798673	478.3	590.072	0.810579	321.25	588.52	0.54586		-56	0.67036
2018-08-24	480.9	590	0.815085	-58	490.2	589.787	0.831147	485.6	591.197	0.821384	354.75	591.389	0.599859		-55	0.68871
2018-08-25	475.4	590	0.805763	-57	479	589.362	0.812744	510.4	591.554	0.862812	354.75	591.389	0.599859		-54	0.72439
2018-08-26	497.7	590	0.843559	-56	469	589.051	0.796196	518.9	590.336	0.878992	374.8	588.07	0.637339		-53	0.74425
2018-08-27	508.8	590	0.862373	-55	465.6	588.986	0.790512	511.8	590.272	0.867058	379.5	592.281	0.640743		-52	0.7552
2018-08-28	496.9	590	0.842203	-54	466.7	591.583	0.788901	530.7	591.753	0.896827	383.6	588.632	0.65168		-51	0.77594
2018-08-29	520.9	590	0.882881	-53	477	588.881	0.810011	514	591.667	0.868732	360.9	588.571	0.61318		-50	0.77294
2018-08-30	502.8	590	0.852203	-52	481.3	591.958	0.813064	546.1	589.312	0.926673	398	591.57	0.672786		-49	0.78787
2018-08-31	516.3	590	0.875085	-51	479.9	589.931	0.813486	538.4	589.682	0.913035	397.3	587.642	0.676092		-48	0.78508
2018-09-01	522.3	590	0.885254	-50	485.1	590.748	0.821162	527.2	590.629	0.892608	394.7	589	0.670119		-47	0.7649
2018-09-02	538	590	0.911864	-49	490.5	590.34	0.830877	554.8	589.085	0.941799	410.9	591.27	0.694945		-46	0.8082
2018-09-03	538.6	590	0.912881	-48	494.7	591.319	0.836604	548.7	590.122	0.929808	422.5	590.078	0.716007		-45	0.78262
2018-09-04	549.4	590	0.931186	-47	503.8	588.121	0.856627	465.9	591.606	0.787518	421.7	588.189	0.716946		-44	0.75704
2018-09-05	539.6	590	0.914576	-46	497.4	588.411	0.845328	555.1	591.605	0.938295	424.6	590.16	0.719466		-43	0.81813
2018-09-06	538.8	590	0.91322	-45	498.8	591.569	0.843182	552.6	589.146	0.937967	425.9	589.37	0.722636		-42	0.82828
2018-09-07	554.3	590	0.939492	-44	504.6	590.385	0.854697	557.5	590.793	0.943647	436.9	587.879	0.74318		-41	0.8324
2018-09-08	532.2	590	0.902034	-43	542.1	591.235	0.916895	575.1	588.363	0.977459	424	590.078	0.71855		-40	0.85118
2018-09-09	549.1	590	0.930678	-42	533.8	589.565	0.905413	568.6	589.102	0.965198	452.9	589.5	0.768278		-39	0.84439
2018-09-10	541.8	590	0.918305	-41	549	588.242	0.933289	570	589.123	0.96754	465.9	590.072	0.789565		-38	0.8513
2018-09-11	544.3	590	0.922542	-40	553.4	590.12	0.937776	576.3	591.453	0.974379	462.9	588.058	0.787168		-37	0.84921
2018-09-12	544.3	590	0.922542	-39	549.4	591.024	0.929573	566.7	588.563	0.962854	465.7	590.634	0.788475		-36	0.88268
2018-09-13	560.5	590	0.95	-38	564.1	589.405	0.957067	563.3	591.429	0.95244	466	590.28	0.789456		-35	0.88247
2018-09-14	557.4	590	0.944746	-37	570.8	588.706	0.969584	581	588.636	0.987027	478.1	588.562	0.812319		-34	0.90249
2018-09-15	586	590	0.99322	-36	561	590.529	0.949995	589	590.625	0.997249	469.2	589.078	0.796499		-33	0.90783
2018-09-16	572.1	590	0.969661	-35	567.1	588.713	0.963287	588.1	590.169	0.996493	494.3	591.689	0.835405		-32	0.90517
2018-09-17	590.2	590	1.00034	-34	596.6	591.486	1.00865	606.2	588.907	1.02936	485.3	591.533	0.82041		-31	0.93292
2018-09-18	593.7	590	1.00627	-33	596.9	588.652	1.01401	613.8	590.054	1.04024	519.5	589.43	0.881359		-30	0.93544
2018-09-19	598.1	590	1.01373	-32	594.6	588.833	1.00979	631.5	589.841	1.07063	526.3	590.559	0.89119		-29	0.95201
2018-09-20	606.5	590	1.02797	-31	594.7	588.778	1.01006	650.7	591.031	1.10096	510	590.637	0.863475		-28	0.96155
2018-09-21	619.9	590	1.05068	-30	586	588.611	0.995564	643.7	591.495	1.08826	526.5	588.82	0.894161		-27	0.99276
2018-09-22	620.8	590	1.0522	-29	595.8	589.396	1.01087	662.5	589.652	1.12354	552.1	591.361	0.933609		-26	1.00958
2018-09-23	893.4	590	1.09203	-28	616.3	590.914	1.04296	666.8	589.158	1.13178	545.2	590.24	0.923693		-25	1.00168
2018-09-24	667.8	590	1.13186	-27	620.3	589.043	1.05306	666.5	589.659	1.13032	559.1	591.579	0.945098		-24	1.01151
2018-09-25	657.8	590	1.11492	-26	633.6	590.895	1.07227	716.5	590.094	1.21421	521.4	591.18	0.881965		-23	1.07884
2018-09-26	646.8	590	1.09627	-25	628.2	590.428	1.06397	667	590.446	1.12966	607.3	589.176	1.03076		-22	1.0214
2018-09-27	664.9	590	1.12695	-24	565.9	591	0.95753	706.1	590.143	1.19649	591.9	591.42	1.00081		-21	1.06152
2018-09-28	667.8	590	1.13186	-23	625.7	591.23	1.0583	708.2	589.286	1.20179	634.2	589.005	1.07673		-20	1.04561
2018-09-29	641.9	590	1.08797	-22	614.4	588.595	1.04384	672.4	589.4	1.14082	594.7	591.271	1.0058		-19	1.08129
2018-09-30	353.7	590	1.11059	-21	624.2	590.914	1.05633	682.4	589.61	1.15738	589.2	588.956	1.00041		-18	1.07405
2018-10-01	668.6	590	1.13322	-20	619.9	588.737	1.05293	678.9	590.197	1.15029	582.6	588.38	0.990177		-17	1.09542
2018-10-02	665.8	590	1.12847	-19	628.2	589.421	1.06579	677.4	590.1	1.14794	567	590.4	0.960366		-16	1.07068
2018-10-03	627.3	590	1.06322	-18	638.9	589.179	1.08439	664.9	591.095	1.12486	581.7	589.429	0.986888		-15	1.05637
2018-10-04	642.3	590	1.08864	-17	636.1	590.761	1.07675	677.8	590.443	1.14795	474.2	589.86	0.803919		-14	1.06482
2018-10-05	612.1	590	1.03746	-16	657.5	590.446	1.11357	655.8	589.4	1.11266	557.9	591.503	0.943191		-13	1.04199
2018-10-06	675.1	590	1.14424	-15	662.2	591.232	1.12003	658.6	589.75	1.11674	569.6	589.832	0.965698		-12	1.05647
2018-10-07	644.3	590	1.09203	-14	646	588.945	1.09688	690.4	589.356	1.17145	525.6	589.387	0.891775		-11	1.09555
2018-10-08	653.2	590	1.10712	-13	697.6	589.242	1.18389	650.6	588.724	1.1051	595.5	590.761	1.00802		-10	1.04168
2018-10-09	668.4	590	1.13288	-12	668	590.493	1.13126	677.4	588.78	1.15051	574.4	589.222	0.974844		-9	1.07659
2018-10-10	679.6	590	1.15186	-11	670.9	590.145	1.13684	666	590.796	1.12729	584.8	591.105	0.989334		-8	1.04637
2018-10-11	652.1	590	1.10525	-10	675.6	589.758	1.14555	660.9	590.55	1.11913	601.5	589.465	1.02042		-7	1.07468
2018-10-12	654.2	590	1.10881	-9	675.4	589.175	1.14635	681.9	590.443	1.15489	609.1	589.684	1.03293		-6	1.10454
2018-10-13	670.7	590	1.13678	-8	685.1	590.622	1.15996	633.5	590.51	1.0728	632.5	590.051	1.07194		-5	1.06446
2018-10-14	649.6	590	1.10102	-7	684.3	589.952	1.15992	688.6	589.381	1.16834	650.7	589.447	1.10392		-4	1.10853
2018-10-15	647.6	590	1.09763	-6	670.2	590.637	1.13471	676	590.146	1.14548	642.9	589.648	1.09031		-3	1.10799
2018-10-16	653.8	590	1.10814	-5	719.9	590.092	1.21998	690.1	590.909	1.16786	590.6	590.444	1.00026		-2	1.12872
2018-10-17	651.9	590	1.10492	-4	691.5	591.005	1.17004	687.5	591.159	1.16297	604.4	589.206	1.02579		-1	1.14228
2018-10-18	671.8	590	1.13864	-3	680.3	590.529	1.15202	653.3	588.693	1.10975	620.9	591.302	1.05006		0	1.11999
2018-10-19	680.4	590	1.15322	-2	669.9	588.804	1.13773	679.6	590.381	1.15112	593.9	589.84	1.00688		1	1.09536
2018-10-20	660.9	590	1.12017	-1	660.7	590.874	1.11817	690.7	589.279	1.17211	601.4	590.27	1.01886		2	1.13929
2018-10-21	687.8	590	1.16576	0	674.6	590.583	1.14226	666.3	589.31	1.13064	616.5	588.802	1.04704		3	1.11691
2018-10-22	656.4	590	1.11254	1	658.5	589.803	1.11647	679.2	588.857	1.15342	608.1	589.263	1.03197		4	1.10411
2018-10-23	659.3	590	1.11746	2	664.5	591.165	1.12405	684.6	589.147	1.16202	620.5	589.43	1.05271		5	1.1062
2018-10-24	660.8	590	1.12	3	667.7	589.757	1.13216	682.1	589.469	1.15714	607.4	589.624	1.03015		6	1.10745
2018-10-25	642.9	590	1.08966	4	663.8	589.01	1.12698	686.8	589.289	1.16547	601.5	589.222	1.02084		7	1.11323
2018-10-26	645.6	590	1.09424	5	676	590.676	1.14445	672.9	590.048	1.14042	607.3	590.778	1.02797		8	1.1032
2018-10-27	667	590	1.13051	6	650.3	591.066	1.10022	677.1	589.619	1.14837	593.7	590.718	1.00505		9	1.10086
2018-10-28	642.2	590	1.08847	7	637.8	589.794	1.08139	693	591.274	1.17205	597.5	591.209	1.01064		10	1.10835
2018-10-29	645.1	590	1.09339	8	657.5	591.282	1.11199	678.9	588.852	1.15292	594.7	590.707	1.00676		11	1.10262
2018-10-30	656.6	590	1.11288	9	645.1	588.571	1.09604	677.3	589.712	1.14853	596.2	589.457	1.01144		12	1.09934
2018-10-31	634.6	590	1.07559	10	640.8	589.444	1.08713	657.6	590.854	1.11296	600.9	591.141	1.01651		13	1.07461
2018-11-01	630.6	590	1.06881	11	620.1	590.737	1.04971	660.2	591.307	1.11651	631.7	589.686	1.07125		14	1.06822
2018-11-02	639.3	590	1.08356	12	614	589.309	1.0419	649.5	590.854	1.09926	612.3	590.106	1.03761		15	1.07423
2018-11-03	650.3	590	1.1022	13	631.1	589.949	1.06975	665.4	589.606	1.12855	600.8	590.378	1.01765		16	1.08037
2018-11-04	663.6	590	1.12475	14	631.1	589.333	1.07087	670.2	589.272	1.13734	581.2	590.549	0.984168		17	1.09857
2018-11-05	654.2	590	1.10881	15	621.9	591.25	1.05184	673.2	590.245	1.14054	593.3	588.703	1.00781		18	1.07595
2018-11-06	637.1	590	1.07983	16	626.3	590.313	1.06096	675.6	588.932	1.14716	599.4	590	1.01593		19	1.0689
2018-11-07	633.5	590	1.07373	17	640.3	590.051	1.08516	672.3	591.225	1.13713	601.5	589.786	1.01986		20	1.06368
2018-11-08	639.8	590	1.08441	18	599.2	590.476	1.01477	666.3	590.792	1.12781	575	589.385	0.975592		21	1.06883
2018-11-09	654.6	590	1.10949	19	618.6	589.794	1.04884	667.4	589.158	1.1328	580.3	591.13	0.981679		22	1.06686
2018-11-10	632.7	590	1.07237	20	631.6	588.848	1.0726	658.3	590.455	1.1149	581.3	590.337	0.984692		23	1.06524
2018-11-11	629.3	590	1.06661	21	625	590.515	1.0584	643	590.918	1.08814	565.5	589.943	0.958567		24	1.04963
2018-11-12	638.4	590	1.08203	22	603.7	589.626	1.02387	663.8	589.01	1.12698	584.4	588.681	0.992727		25	1.04114
2018-11-13	661.2	590	1.12068	23	603.5	589.73	1.02335	672.9	589.024	1.1424	572.3	588.418	0.972608		26	1.05864
2018-11-14	617.5	590	1.04661	24	588.7	591.374	0.995479	647.5	589.447	1.09849	564.7	590.114	0.956933		27	1.04322
2018-11-15	614.5	590	1.04153	25	593.9	588.859	1.00856	665.9	590.099	1.12845	585.8	590.109	0.992697		28	1.05986
2018-11-16	621.9	590	1.05407	26	572.8	590.335	0.970296	651.2	590.202	1.10335	544.9	589.532	0.924292		29	1.03328
2018-11-17	606	590	1.02712	27	589.7	590.489	0.998664	634.8	590.104	1.07574	543.9	589.337	0.922901		30	1.01868
2018-11-18	602.7	590	1.02153	28	601.3	589.405	1.02018	631.4	588.918	1.07214	539.2	590.361	0.913339		31	1.0201
2018-11-19	601.2	590	1.01898	29	609.7	589.309	1.0346	637.6	589.275	1.08201	583.6	588.678	0.991374		32	1.00495
2018-11-20	596	590	1.01017	30	597.9	588.811	1.01544	634.8	589.326	1.07716	580	589.167	0.984441		33	0.99012
2018-11-21	608.5	590	1.03136	31	592.9	588.462	1.00754	580.3	588.389	0.986252	572.1	591.477	0.967239		34	0.96608
2018-11-22	586.3	590	0.993729	32	610.7	589.626	1.03574	642.5	590.615	1.08785	570	590.682	0.964987		35	1.03313
2018-11-23					591.9	590.824	1.00182	638.8	591.333	1.08027	563.9	591.143	0.953915		36	1.0331
2018-11-24					608.9	588.978	1.03382	641.6	589.34	1.08868	548	590.595	0.927877		37	1.02378
2018-11-25					587.1	589.503	0.995924	638	589.179	1.08286	561.1	590.174	0.950736		38	1.01846
2018-11-26					586.8	590	0.994576	651.7	589.3	1.10589	575.2	589.659	0.975479		39	1.03185
2018-11-27					573.4	591.552	0.969315	622.4	588.542	1.05753	561.4	590.345	0.95097		40	0.99574
2018-11-28					561	588.895	0.952631	640.7	588.673	1.08838	542.5	590.299	0.919025		41	1.02431
2018-11-29					576.8	590.171	0.977343	623.4	591.309	1.05427	578.1	589.27	0.981045		42	1.00856
2018-11-30					575.4	591.561	0.972681	607.5	589.574	1.0304	573.8	590.739	0.971326		43	0.99198
2018-12-01					578.6	589.598	0.981347	580.5	589.777	0.984271	541.1	589.701	0.917584		44	0.95754
2018-12-02					565.9	590.529	0.958293	606.3	590.265	1.02717	548.1	589.226	0.930203		45	0.98695
2018-12-03					548.8	590.422	0.929505	624	588.802	1.05978	585.6	588.833	0.994509		46	1.00282
2018-12-04					544.3	588.333	0.925156	608.4	590	1.03119	516.3	591.2	0.873309		47	0.97382
2018-12-05					560.3	590.592	0.94871	609.4	590.27	1.03241	530.3	589.198	0.900038		48	0.98132
2018-12-06					555.4	589.527	0.942112	605	591.576	1.02269	539.8	589.76	0.915287		49	0.99183
2018-12-07					545	590.119	0.923542	613.3	589.415	1.04052	542.8	590.592	0.919078		50	0.94778
2018-12-08					542.3	591.687	0.916532	615.1	589.894	1.04273	550	590.237	0.93183		51	0.95597
2018-12-09					563.6	591.228	0.95327	624.6	591.406	1.05613	547	589.884	0.927301		52	0.97337
2018-12-10					551.6	588.882	0.93669	634.4	589.791	1.07564	559	590.343	0.946907		53	0.97894
2018-12-11					550.3	588.876	0.934493	632.4	589.115	1.07348	531.2	588.364	0.902843		54	0.97628
2018-12-12					544.3	590.976	0.921019	632.2	588.646	1.07399	558.7	590.914	0.945484		55	0.97261
2018-12-13					549.4	591.657	0.928579	614.5	589.418	1.04255	534.6	589.112	0.907467		56	0.98091
2018-12-14					546.7	588.631	0.928765	610.2	590.963	1.03255	511.2	588.562	0.868557		57	0.95736
2018-12-15					544.3	589.048	0.924034	586.1	589.016	0.995049	522.8	590.062	0.886008		58	0.95834
2018-12-16					533.1	589.091	0.904954	606	590.432	1.02637	530	588.889	0.9		59	0.95162
2018-12-17					563.4	589.364	0.955945	605.3	591.129	1.02397	525.7	590.062	0.890924		60	0.94037
2018-12-18					562	589.306	0.953664	598.9	590.87	1.01359	518.9	589	0.880985		61	0.94279
2018-12-19					563.6	591.047	0.953563	615.7	588.947	1.04542	538.9	590.12	0.913203		62	0.95649
2018-12-20					565.3	589.545	0.958874	625.3	591.211	1.05766	513.9	591.062	0.869451		63	0.95118
2018-12-21					577.2	588.708	0.980452	617.5	589.048	1.0483	533.2	588.841	0.905507		64	0.96174
2018-12-22					571.4	589.086	0.969978	636	589.427	1.07901	524.1	588.344	0.890806		65	0.98196
2018-12-23					557.3	590.058	0.944483	618.6	590	1.04847	503.5	589.29	0.854418		66	0.95716
2018-12-24					557.1	591.512	0.941824	610.8	588.77	1.03742	521	591.118	0.881381		67	0.96727
2018-12-25					531.5	588.589	0.903007	600.6	591.148	1.01599	552.9	589.24	0.938328		68	0.96242
2018-12-26					521.4	591.235	0.881883	649.2	590.96	1.09855	526.7	588.405	0.895132		69	0.97432
2018-12-27					561.8	591.25	0.95019	608.7	589.838	1.03198	511.7	591.835	0.864598		70	0.95261
2018-12-28					576.4	588.757	0.979012	593.6	590.166	1.00582	513.4	588.75	0.872017		71	0.96199
2018-12-29					546.1	591.31	0.923543	603.1	590.273	1.02173	512.5	589.875	0.868828		72	0.93996
2018-12-30					589.7	590.497	0.99865	606.3	589.293	1.02886	510.4	589.188	0.866278		73	0.92511
2018-12-31					571	589.489	0.968636	611.8	590.591	1.03591	529.8	590.184	0.897686		74	0.95271
2019-01-01					563.8	591.322	0.953457	619.1	590.319	1.04875	525.2	591.728	0.887569		75	0.96553
2019-01-02					563.7	590.462	0.954675	611.9	591.297	1.03484	495.8	591.579	0.838096		76	0.94155
2019-01-03					550.4	589.701	0.933355	608.8	589.348	1.03301	517.3	589.938	0.876873		77	0.97645
2019-01-04					558	591.369	0.943573	571.6	591.243	0.966777	508.3	589.416	0.86238		78	0.94099
2019-01-05					545.2	588.393	0.926592	628.1	590.909	1.06294	544	590.848	0.92071		79	0.9515
2019-01-06					543.7	600.494	0.905421	612.5	591.568	1.03538	526.3	588.951	0.893623		80	0.95564
2019-01-07					556.5	600.182	0.927219	620.9	588.639	1.05481	521.7	590.125	0.88405		81	0.95018
2019-01-08					549.9	599.268	0.917619	617.2	590.838	1.04462	510.1	590.382	0.864017		82	0.96963
2019-01-09					555.8	598.242	0.929055	610	588.457	1.03661	532.2	589.08	0.903443		83	0.95227
2019-01-10					551.3	598.405	0.921283	598.3	591.25	1.01192	487.3	590.537	0.825181		84	0.9338
2019-01-11					578.7	601.579	0.961969	613.3	589.362	1.04062	497	588.553	0.844444		85	0.94395
2019-01-12					588.6	598.457	0.983529	608.3	590.378	1.03036	482	588.562	0.818946		86	0.95047
2019-01-13					566.1	600.536	0.942658	597.9	591.209	1.01132	470.9	589.643	0.798619		87	0.92185
2019-01-14					561.3	598.263	0.938215	582.1	588.475	0.989168	486.6	590.139	0.824552		88	0.9183
2019-01-15					546.7	601.75	0.908517	561	590.117	0.950659	502.2	589.048	0.852563		89	0.91052
2019-01-16					530.8	601.72	0.882138	514.6	590.719	0.871142	507.5	591.486	0.858008		90	0.88443
2019-01-17					533.4	601.019	0.887493	614.2	589.286	1.04228	535	590.19	0.906488		91	0.9365
2019-01-18					537.7	601.375	0.894118	566.4	590.296	0.959519	534.7	588.354	0.908806		92	0.91677
2019-01-19					564.2	600.888	0.938944	576	590.116	0.976079	547.7	590	0.928305		93	0.9142
2019-01-20					555.9	601.497	0.924194	548.3	588.242	0.932099	546.9	588.994	0.928533		94	0.90691
2019-01-21					542.6	600.976	0.902865	540.7	588.696	0.918471	531.6	588.846	0.902782		95	0.90492
2019-01-22					571.5	600.536	0.95165	538.4	589.562	0.91322	542	588.354	0.921213		96	0.91188
2019-01-23					564.5	600.714	0.939715	508.7	589.091	0.863534	549.9	589.308	0.933128		97	0.91034
2019-01-24					569.4	599.704	0.949468	514.4	591.053	0.870312	565.9	590.549	0.958261		98	0.8991
2019-01-25					554.1	598.373	0.92601	513.5	589.342	0.871311	543.7	591.582	0.919061		99	0.89846
2019-01-26					546.2	598.519	0.912587	498.1	591.781	0.841697	488.6	588.552	0.830173		100	0.90883
2019-01-27					533.9	599.937	0.889927	514.4	591.854	0.869133	487.5	588.207	0.82879		101	0.92237
2019-01-28					516.8	598.411	0.863621	494.1	589.793	0.837751	480.7	591.259	0.813011		102	0.90209
2019-01-29					529.9	600.196	0.882878	501.6	591.517	0.847989	478.4	590.78	0.809777		103	0.86806
2019-01-30					536.3	598.553	0.895995	497.7	590.828	0.842378	466.5	591.655	0.788467		104	0.86125
2019-01-31					543.3	598.896	0.907169	510.9	591.689	0.86346	501.5	591.301	0.848129		105	0.85547
2019-02-01					551.1	600.387	0.917908	486.9	590	0.825254	533.9	588.344	0.907462		106	0.83288
2019-02-02					546.1	599.742	0.910558	493.6	590.915	0.835314	481	590.903	0.814009		107	0.83555
2019-02-03					554.3	598.981	0.925405	503.2	590.483	0.852184	472.8	588.38	0.803562		108	0.86544
2019-02-04					519.4	601.126	0.864045	509.6	588.288	0.866243	475.2	589.72	0.805806		109	0.89362
2019-02-05					514.6	600.685	0.856689	512.3	588.456	0.870583	483.4	590.559	0.818546		110	0.8675
2019-02-06					510.7	600.897	0.849897	493.9	590.352	0.836619	487.9	587.986	0.829782		111	0.85025
2019-02-07					523.5	598.533	0.874638	484	589.214	0.821433	474.9	588.31	0.807228		112	0.85088
2019-02-08					503.1	598.69	0.840335	465.1	590.075	0.788205	467.5	590.638	0.791517		113	0.8236
2019-02-09					481.5	600.493	0.801841	486.5	591.079	0.823071	470.4	591.583	0.795155		114	0.83651
2019-02-10					530.3	599.346	0.884797	456.6	588.092	0.77641	470.7	588.169	0.80028		115	0.81118
2019-02-11					508.7	600.676	0.84688	431.9	588.56	0.733825	470.3	589.504	0.79779		116	0.79999
2019-02-12					514	600.667	0.855716	458.3	589.545	0.777379	482	590.417	0.816373		117	0.80429
2019-02-13					511.1	600.405	0.851258	482.2	589.927	0.817389	489.9	590.414	0.829757		118	0.8065
2019-02-14					501.8	601.301	0.834523	473.9	590.963	0.801912	465.1	589.493	0.788983		119	0.82817
2019-02-15					522.2	599.934	0.870429	481.7	591.643	0.814174	477.9	589.645	0.810487		120	0.82581
2019-02-16					499.6	600.204	0.832384	470.1	590.735	0.795788	496.2	589.034	0.842396		121	0.82709
2019-02-17					494.8	601.944	0.822003	474	590.441	0.80279	477.9	589.22	0.811072		122	0.81434
2019-02-18					475	599.214	0.792705	463.4	588.571	0.78733	467.2	589.565	0.792448		123	0.81078
2019-02-19					480	601.944	0.797416	461	589.389	0.782166	454.4	592.164	0.767355		124	0.83166
2019-02-20					480.4	600.479	0.800027	463.4	591.846	0.782974	466.2	590.438	0.789583		125	0.80881
2019-02-21					491.7	601.141	0.817945	474.6	587.955	0.807205	466.5	588.071	0.793271		126	0.80722
2019-02-22					492.6	601.486	0.818971	487.4	591.119	0.824537	454.1	589.552	0.770246		127	0.79487
2019-02-23					492.8	598.716	0.823094	471.8	592.137	0.796775	460.8	590.73	0.780052		128	0.79459
2019-02-24					514.4	600.455	0.856684	484.1	590.373	0.81999	458.9	590	0.777797		129	0.80443
2019-02-25					443.3	600.075	0.738741	471.1	591.667	0.796225	487.7	588.671	0.828476		130	0.79481
2019-02-26					443.8	598.134	0.741974	486.6	588.759	0.826484	487.5	590.476	0.825605		131	0.8085
2019-02-27					432.7	599.692	0.721537	467.5	589.776	0.792674	480.3	589.437	0.814846		132	0.79785
2019-02-28					420.7	600.4	0.7007	475.7	589.489	0.80697	471	589.281	0.79928		133	0.83071
2019-03-01					441.1	601.923	0.732818	459.4	589.389	0.779451	441.6	591.729	0.746287		134	0.78127
2019-03-02					443.6	598.409	0.741299	487.6	589.275	0.827457	439.9	591.221	0.744053		135	0.79476
2019-03-03					438.1	602	0.727741	477.8	589.706	0.810234	449.6	590.368	0.761559		136	0.77702
2019-03-04					442.5	601.527	0.735628	463.8	589.924	0.786203	454.1	591.045	0.768301		137	0.7444
2019-03-05					444.3	600.833	0.739473	463.8	590.687	0.785187	434.8	590.31	0.736562		138	0.75402
2019-03-06					444.3	599.023	0.741708	472.1	591.852	0.797666	457.1	588.593	0.776598		139	0.76684
2019-03-07					447.5	598.582	0.7476	481.2	587.956	0.818428	441.4	588.947	0.749473		140	0.77149
2019-03-08					447.9	598.421	0.74847	479.4	590.507	0.811844	425.2	588.837	0.722101		141	0.76134
2019-03-09					481.8	600.922	0.801768	460	589.398	0.780457	400.3	590.738	0.677627		142	0.76551
2019-03-10					473.4	599.64	0.789473	468.9	588.897	0.796234	425.9	590.853	0.720823		143	0.76247
2019-03-11					452.2	601.471	0.751824	475.8	588.015	0.809163	433.5	587.863	0.737417		144	0.75962
2019-03-12					476.6	600.714	0.793389	467.4	591.791	0.789806	412.4	591.429	0.697295		145	0.73863
2019-03-13					462.3	599.854	0.770688	460.9	589.03	0.782473	412.1	590.32	0.698096		146	0.76835
2019-03-14					461.5	600.074	0.769072	450.8	588.397	0.766149	392.5	588.25	0.667233		147	0.76435
2019-03-15					467.6	599.781	0.779618	439.7	588.74	0.746849	412.8	587.68	0.702423		148	0.73199
2019-03-16					453.5	599.63	0.7563	451.5	590.84	0.764167	409.2	588.889	0.694868		149	0.75188
2019-03-17					460.6	601.618	0.765603	452	588.55	0.76799	418.1	590.48	0.708068		150	0.7353
2019-03-18					458.2	599.489	0.764318	447.9	588.846	0.76064	418	587.68	0.711271		151	0.74405
2019-03-19					452.4	601.103	0.752617	461.2	591.298	0.779979	403.3	589.431	0.684219		152	0.75149
2019-03-20					473.7	599.507	0.790149	448.3	591.679	0.757674	383.7	588.621	0.651863		153	0.74068
2019-03-21					474.4	599.786	0.790949	439.9	591.68	0.743476	399.4	587.967	0.679289		154	0.74012
2019-03-22					463.2	599.565	0.77256	439.8	588.359	0.747502	402.1	590.894	0.680494		155	0.73201
2019-03-23					445.1	599.47	0.74249	436.5	588.74	0.741414	398.2	588.115	0.677079		156	0.7153
2019-03-24					459	599.124	0.766118	431.3	590.238	0.730722	396	589.008	0.672317		157	0.73339
2019-03-25					443.5	599.185	0.740172	419.6	591.22	0.709719	372.5	587.826	0.633691		158	0.72705
2019-03-26					404.7	599.167	0.675438	448.2	590.853	0.758565	385.3	588.174	0.655078		159	0.73607
2019-03-27					461	597.744	0.771233	450.5	590.606	0.762776	385.8	587.5	0.656681		160	0.72586
2019-03-28					395	598.718	0.659743	450.5	590.606	0.762776	404.4	588.443	0.687238		161	0.72086
2019-03-29					424.2	600.394	0.706536	439.3	589.808	0.744819	396.7	587.899	0.674776		162	0.71336
2019-03-30					409.4	600.569	0.681687	439.3	589.808	0.744819	398	588.099	0.676757		163	0.69231
2019-03-31					431.1	599.528	0.719066	434.3	588.622	0.737825	415.8	588.254	0.706838		164	0.7321
2019-04-01					422.2	600.24	0.703385	434.3	588.622	0.737825	426.5	588.333	0.724929		165	0.69078
2019-04-02					423.4	599.444	0.706321	456.45	589.549	0.774236	423.9	590.873	0.717413		166	0.71918
2019-04-03					438	601.318	0.7284	456.45	589.549	0.774236	419	592.24	0.707483		167	0.72092
2019-04-04					445.5	601.136	0.741096	470.3	589.82	0.797362	438.4	590	0.743051		168	0.74712
2019-04-05					431.7	602.047	0.717053	470.3	589.82	0.797362	450.6	589.627	0.764212		169	0.73939
2019-04-06					425.8	598.661	0.711253	460.1	591.63	0.777682	425.4	590.472	0.72044		170	0.7305
2019-04-07					424.6	600.709	0.706832	490.3	588.75	0.832781	445.7	589.403	0.756189		171	0.76808
2019-04-08					443.6	599.308	0.740187	488.3	591.958	0.82489	427.9	588.14	0.727548		172	0.77673
2019-04-09					434.6	598.837	0.72574	466.7	588.214	0.793418	407.8	592.114	0.688719		173	0.74364
2019-04-10					435.5	600.923	0.724718	472.7	591.049	0.799765	391.2	587.731	0.665611		174	0.75574
2019-04-11					434.5	598.923	0.725469	477.8	590.828	0.808696	403.8	588.678	0.685944		175	0.74769
2019-04-12					427.9	601.085	0.711879	463.1	588.936	0.786333	428.5	591.953	0.723875		176	0.73841
2019-04-13					425.7	600.157	0.709314	458.8	590.571	0.776875	425.7	591.811	0.719317		177	0.72274
2019-04-14					423.7	601.484	0.704424	475.9	590.556	0.805851	424.6	589.766	0.719947		178	0.73884
2019-04-15					397.3	602.437	0.659488	475.3	590.208	0.805309	433.4	591.24	0.733035		179	0.75155
2019-04-16					439.1	600.992	0.730625	464.2	588.511	0.788771	446.1	591.88	0.7537		180	0.73999
2019-04-17					420.8	599.213	0.702255	471.1	590.141	0.798284	435	588.397	0.739297		181	0.74251
2019-04-18					422.3	602.047	0.70144	481.6	591.31	0.814462	410.1	588.08	0.697354		182	0.75064
2019-04-19					413.3	600.484	0.688278	468.2	591.69	0.791293	419.3	587.969	0.713133		183	0.73483
2019-04-20					418.5	599.606	0.697958	461.4	588.357	0.784218	434	589.847	0.735784		184	0.75138
2019-04-21					427.5	598.295	0.714531	473.9	589.51	0.803887	417.7	587.717	0.710717		185	0.7345
2019-04-22					428.4	599.457	0.714646	455	589.928	0.77128	433.5	591.484	0.732902		186	0.72862
2019-04-23					419.1	598.72	0.699993	462.6	590.282	0.783694	406.1	589.748	0.688599		187	0.73592
2019-04-24					425.1	600.234	0.708223	461.5	591.135	0.780702	410.4	590.579	0.694912		188	0.72979
2019-04-25					430.2	599.535	0.717556	441.7	590.221	0.748364	379.3	591.892	0.640826		189	0.73193
2019-04-26					440.1	599.015	0.734706	457.3	589.143	0.776212	385.9	588.291	0.655968		190	0.72649
2019-04-27					415.7	601.04	0.691635	471.4	589.931	0.799077	411.5	589.758	0.697744		191	0.73133
2019-04-28					442.4	602.137	0.734716	443.3	588.841	0.752835	375.2	591.15	0.634695		192	0.70063
2019-04-29					421.6	597.734	0.70533	428.8	588.358	0.728808	384.4	592.544	0.648728		193	0.70078
2019-04-30					424.6	601.811	0.705537	418.1	589.389	0.709378	378.8	587.982	0.644237		194	0.71394
2019-05-01					453.5	602.164	0.753117	432.2	589.323	0.733384	392.7	589.573	0.666076		195	0.68657
2019-05-02					411.6	602.258	0.683428	430.3	588.421	0.731279	300.7	591.724	0.508176		196	0.70491
2019-05-03					424	598.268	0.708713	424.3	591.818	0.716943	328.1	592.396	0.553853		197	0.68884
2019-05-04					431.7	600.769	0.718579	423.4	589.774	0.717902	318.3	591.183	0.538412		198	0.6965
2019-05-05					437	599.618	0.728797	437.7	588.043	0.744333	300.7	587.303	0.512001		199	0.66854
2019-05-06					504.6	599.61	0.841546	420.4	591.615	0.710597	335.4	587.7	0.570699		200	0.64929
2019-05-07					504.2	598.658	0.842217	435.1	589.389	0.738222	331.8	587.449	0.564815		201	0.66178
2019-05-08					308.6	601.474	0.513073	430.2	589.237	0.730097	321.9	587.5	0.547915		202	0.65356
2019-05-09					348.7	602.056	0.579182	422.8	591.077	0.715305	326.9	592.577	0.551658		203	0.6716
2019-05-10					518.4	599.419	0.864837	422.9	589.692	0.717154	332.9	590	0.564237		204	0.70784
2019-05-11					295.5	603.152	0.489926	444.9	591.111	0.75265	340.1	588.119	0.578285		205	0.71426
2019-05-12					474.9	599.504	0.792155	437.8	591.418	0.740255	312	587.849	0.530748		206	0.60166
2019-05-13					302.3	597.742	0.505737	438.5	588.148	0.74556	322.2	589.688	0.546391		207	0.62966
2019-05-14					480.8	601.338	0.79955	427.6	589.318	0.725584	305.1	593.258	0.514278		208	0.65687
2019-05-15					274.4	598.916	0.458161	427.4	591.298	0.722817	320.85	590.316	0.543523		209	0.58116
2019-05-16					334.6	599.615	0.558024	401.7	590.081	0.680754	320.85	590.316	0.543523		210	0.6731
2019-05-17					273.9	598.795	0.457419	412.8	589.206	0.700603	341.55	589.755	0.579139		211	0.57354
2019-05-18					259.9	596.538	0.43568	346.6	591.852	0.58562	341.55	589.755	0.579139		212	0.60826
2019-05-19					273.7	602.785	0.454059	354.1	591.776	0.598369	308.9	592.967	0.52094		213	0.53335
2019-05-20					251.9	603.194	0.41761	350.1	589.444	0.593949	308.9	592.967	0.52094		214	0.57704
2019-05-21					213.7	600.323	0.355975	294.1	587.609	0.500503	223.3	586.522	0.380719		215	0.44755
2019-05-22					125.95	605.921	0.207865	309.3	588.511	0.525564	223.3	586.522	0.380719		216	0.49406
2019-05-23					125.95	605.921	0.207865	210.9	589.242	0.357917	86.2	582.885	0.147885		217	0.51494
2019-05-24					118.15	598.143	0.197528				86.2	582.885	0.147885		218	0.4266
2019-05-25					118.15	598.143	0.197528								219	0.39578
2019-05-26					129	597.105	0.216042								220	0.20531
2019-05-27					119.4	601.111	0.198632								221	0.20531
2019-05-28					119.4	601.111	0.198632								222	0.18766
2019-05-29					105.95	600.323	0.176488								223	0.18766
2019-05-30					105.95	600.323	0.176488								224	0.20618
2019-05-31					78.8	600.87	0.131143								225	0.18877
2020-05-31															226	0.18877
Total	64659.9				152541			157616			137246				227	0.16662
															228	0.16662
															229	0.12128

## Sheet: Milk Protein per cow
Date	Tatua 78306 2021/22 Protein (kg)	Cows	Protein per cow	Tatua 78306 2020/21 Protein (kg)	Cows	Protein per cow	Tatua 78306 2019/20 Protein (kg)	Cows	Protein per cow	Tatua 78306 2018/19 Protein (kg)	Cows	Protein per cow		Means
2018-07-19										24.2	617.222	0.0392079		Term	Fitted Mean
2018-07-20										24.2	588.182	0.0411437		Year
2018-07-21										30.8	588.182	0.0523648		2018	0.586634
2018-07-22										30.8	605.769	0.0508444		2019	0.66219
2018-07-23										35.1	605.769	0.0579429		2020	0.644563
2018-07-24				32.55	587.917	0.055365				35.1	597.812	0.0587141		Days from peak
2018-07-25	48.25	590	0.0817797	32.55	587.917	0.055365				43.85	597.812	0.0733508		-84	-0.003724
2018-07-26	48.25	590	544	57.35	596.905	0.096079	15.4	563.333	0.0273373	43.85	601.75	0.0728708		-83	-0.003724
2018-07-27	76.4	590	0.129492	57.35	596.905	0.096079	15.4	563.333	0.0273373	55.15	601.75	0.0916494		-82	0.049179
2018-07-28	76.4	590	0.129492	90.35	585.588	0.154289	50.95	582.368	0.0874876	55.15	592.6	0.0930645		-81	0.049179
2018-07-29	114.2	590	0.193559	90.35	585.588	0.154289	50.95	582.368	0.0874876	66.95	592.6	0.112977		-80	0.095931
2018-07-30	114.2	590	0.193559	136	592.4	0.229575	83.85	597.742	0.140278	66.95	598.036	0.11195		-79	0.095931
2018-07-31	136.2	590	0.230847	136	592.4	0.229575	83.85	597.742	0.140278	72.15	598.036	0.120645		-78	0.154413
2018-08-01	169.05	590	0.286525	169.25	587.692	0.287991	116.75	586.591	0.199031	72.15	582.206	0.123925		-77	0.154413
2018-08-02	169.05	590	0.286525	169.25	587.692	0.287991	116.75	586.591	0.199031	87.95	582.206	0.151063		-76	0.229228
2018-08-03	197.1	590	0.334068	195.25	593.092	0.329207	200.2	593.247	0.337465	87.95	593.846	0.148102		-75	0.190293
2018-08-04	220.2	590	0.37322	195.25	593.092	0.329207	130.7	668.523	0.195506	102.35	593.846	0.172351		-74	0.219501
2018-08-05	220.2	590	0.37322	228.9	590.909	0.387369	130.7	668.523	0.195506	102.35	589.167	0.17372		-73	0.252424
2018-08-06	232.7	590	0.394407	228.9	590.909	0.387369	190.2	592.192	0.32118	103.55	589.167	0.175757		-72	0.292116
2018-08-07	232.7	590	0.394407	256.75	590.65	0.434691	219.9	586.726	0.374792	103.55	589.4	0.175687		-71	0.292573
2018-08-08	267.2	590	0.452881	256.75	590.65	0.434691	219.9	586.726	0.374792	133.3	589.4	0.226162		-70	0.324567
2018-08-09	267.2	590	0.452881	283.1	591.441	0.478661	243.1	592.097	0.410575	133.3	594.138	0.224359		-69	0.324544
2018-08-10	286.55	590	0.485678	283.1	591.441	0.478661	243.1	592.097	0.410575	155.85	594.138	0.262313		-68	0.368652
2018-08-11	286.55	590	0.485678	288.7	588.938	0.490204	263.8	592.67	0.445104	155.85	588.03	0.265037		-67	0.368051
2018-08-12	299.7	590	0.507966	305.1	590.268	0.516884	263.8	592.67	0.445104	172.05	588.03	0.292587		-66	0.402119
2018-08-13	326.8	590	0.553898	302.1	589.407	0.512549	275.6	592.202	0.465382	172.05	589.416	0.291899		-65	0.403278
2018-08-14	337.9	590	0.572712	324.5	591.984	0.548157	274.3	588.455	0.466136	195.65	589.416	0.331939		-64	0.420544
2018-08-15	340.9	590	0.577797	312.7	590.328	0.529706	282.9	590.804	0.478839	195.65	589.367	0.331966		-63	0.434451
2018-08-16	348.2	590	0.590169	324.3	589.12	0.550482	293	592.435	0.494569	194.8	589.367	0.330524		-62	0.457679
2018-08-17	355.3	590	0.602203	335	590.873	0.566958	311.5	589.35	0.528549	194.8	590.132	0.330096		-61	0.465463
2018-08-18	367.5	590	0.622881	332.9	590.787	0.563485	303.8	588.455	0.516267	190.4	590.132	0.32264		-60	0.465652
2018-08-19	350.8	590	0.594576	339.2	587.969	0.576901	316.2	589.127	0.536726	190.4	591.989	0.321628		-59	0.476236
2018-08-20	363.5	590	0.616102	342.8	588.346	0.58265	322.3	588	0.548129	226.5	591.989	0.382609		-58	0.544753
2018-08-21	397.9	590	0.674407	345.4	589.926	0.585497	333.3	587.786	0.567043	226.5	588.52	0.384863		-57	0.549469
2018-08-22	396.1	590	0.671356	360.5	588.944	0.612113	342.9	591.259	0.579949	255.5	588.52	0.43414		-56	0.512977
2018-08-23	386.2	590	0.654576	360.9	590.355	0.611327	341.9	590.072	0.579421	255.5	591.389	0.432034		-55	0.522043
2018-08-24	389.4	590	0.66	341.4	589.787	0.578853	353.9	591.197	0.598616	283.95	591.389	0.480141		-54	0.545608
2018-08-25	382.8	590	0.648814	352	589.362	0.597256	365.1	591.554	0.617188	283.95	588.07	0.482851		-53	0.551718
2018-08-26	394.2	590	0.668136	338	589.051	0.573804	360.7	590.336	0.611008	295.6	592.281	0.499088		-52	0.564804
2018-08-27	398.2	590	0.674915	347.2	588.986	0.589488	355.9	590.272	0.602942	295.7	588.632	0.502351		-51	0.568292
2018-08-28	406.4	590	0.688814	355.6	591.583	0.601099	380.6	591.753	0.643173	305.1	588.571	0.518374		-50	0.575871
2018-08-29	411.6	590	0.697627	365.1	588.881	0.619989	373.5	591.667	0.631268	298.3	591.57	0.504251		-49	0.583161
2018-08-30	411	590	0.69661	365.2	591.958	0.616936	396.8	589.312	0.673327	317.8	587.642	0.540805		-48	0.588276
2018-08-31	410.4	590	0.695593	369.6	589.931	0.626514	387.4	589.682	0.656965	325.5	589	0.552632		-47	0.600914
2018-09-01	405	590	0.686441	383.3	590.748	0.648838	411.9	590.629	0.697392	312.1	591.27	0.527847		-46	0.619665
2018-09-02	427.2	590	0.724068	377.3	590.34	0.639123	411.3	589.085	0.698201	334.1	590.078	0.566196		-45	0.626586
2018-09-03	422.7	590	0.716441	356.8	591.319	0.603396	419.1	590.122	0.710192	332.8	588.189	0.565805		-44	0.578948
2018-09-04	427.4	590	0.724407	372.5	588.121	0.633373	344.6	591.606	0.582482	325.3	590.16	0.551206		-43	0.632246
2018-09-05	427	590	0.723729	391.1	588.411	0.664672	403.3	591.605	0.681705	313.1	589.37	0.531245		-42	0.635653
2018-09-06	425.4	590	0.721017	406.3	591.569	0.686818	413.6	589.146	0.702033	322.6	587.879	0.548753		-41	0.616985
2018-09-07	436.1	590	0.739153	416.4	590.385	0.705303	411.4	590.793	0.696353	339.1	590.078	0.57467		-40	0.632387
2018-09-08	430.9	590	0.730339	415.7	591.235	0.703105	431	588.363	0.732541	337.2	589.5	0.57201		-39	0.639409
2018-09-09	434.6	590	0.73661	415.4	589.565	0.704587	415.2	589.102	0.704802	372.4	590.072	0.631109		-38	0.667983
2018-09-10	430.6	590	0.729831	421.6	588.242	0.716711	437.4	589.123	0.74246	354.3	588.058	0.602492		-37	0.674311
2018-09-11	431.7	590	0.731695	432.1	590.12	0.732224	441	591.453	0.745621	354.5	590.634	0.600203		-36	0.680454
2018-09-12	424.2	590	0.718983	431.7	591.024	0.730427	416.2	588.563	0.707146	373	590.28	0.631904		-35	0.678213
2018-09-13	447.2	590	0.757966	426.1	589.405	0.722933	430.3	591.429	0.72756	378.1	588.562	0.642414		-34	0.696629
2018-09-14	443.3	590	0.751356	430	588.706	0.730416	455	588.636	0.772973	381.2	589.078	0.647113		-33	0.70896
2018-09-15	447.6	590	0.758644	442.9	590.529	0.750005	450.5	590.625	0.762751	361.4	591.689	0.610794		-32	0.715449
2018-09-16	452.6	590	0.767119	439.6	588.713	0.746713	456.5	590.169	0.773507	381.4	591.533	0.644765		-31	0.72356
2018-09-17	446.9	590	0.757458	438.5	591.486	0.741353	471.5	588.907	0.800636	402	589.43	0.682014		-30	0.716989
2018-09-18	444.7	590	0.753729	450.9	588.652	0.765988	477.8	590.054	0.809756	411.8	590.559	0.697305		-29	0.738048
2018-09-19	463.3	590	0.785254	465.3	588.833	0.790207	483.3	589.841	0.819373	424.5	590.637	0.718716		-28	0.755923
2018-09-20	470.3	590	0.797119	465.1	588.778	0.789941	495.9	591.031	0.839042	417.3	588.82	0.708706		-27	0.763466
2018-09-21	489.6	590	0.829831	473.5	588.611	0.804436	503.8	591.495	0.85174	421.5	591.361	0.712763		-26	0.790386
2018-09-22	493.2	590	0.835932	476.9	589.396	0.809134	522.7	589.652	0.886455	447.3	590.24	0.757828		-25	0.795709
2018-09-23	501.3	590	0.849661	482.8	590.914	0.817039	523.3	589.158	0.888216	440.5	591.579	0.744617		-24	0.807463
2018-09-24	509.4	590	0.86339	487.1	589.043	0.826935	542.3	589.659	0.919685	452.5	591.18	0.765418		-23	0.822684
2018-09-25	506.3	590	0.858136	489.1	590.895	0.827728	534.5	590.094	0.905787	430.4	589.176	0.730512		-22	0.814699
2018-09-26	499.8	590	0.847119	475.9	590.428	0.806026	525.7	590.446	0.890345	465	591.42	0.786243		-21	0.828656
2018-09-27	511.7	590	0.867288	438.8	591	0.74247	533.2	590.143	0.90351	449	589.005	0.762302		-20	0.818551
2018-09-28	519.7	590	0.880847	479.9	591.23	0.811698	529.3	589.286	0.898206	490.8	591.271	0.830077		-19	0.824383
2018-09-29	496.6	590	0.841695	474.5	588.595	0.806158	506.4	589.4	0.859179	475.5	588.956	0.807361		-18	0.820317
2018-09-30	496.6	590	0.841695	474.9	590.914	0.80367	526.3	589.61	0.892624	482.7	588.38	0.820388		-17	0.861609
2018-10-01	518.4	590	0.878644	498.7	588.737	0.847068	519.2	590.197	0.879706	470.6	590.4	0.797087		-16	0.827039
2018-10-02	518	590	0.877966	491.7	589.421	0.834208	508.7	590.1	0.862058	466.2	589.429	0.790936		-15	0.837228
2018-10-03	506.7	590	0.858814	510	589.179	0.865611	523.2	591.095	0.885138	449.8	589.86	0.762554		-14	0.827602
2018-10-04	513.3	590	0.87	527.7	590.761	0.893254	520.8	590.443	0.882049	369.3	591.503	0.624342		-13	0.841782
2018-10-05	484.2	590	0.820678	535.2	590.446	0.906434	523	589.4	0.887343	465.4	589.832	0.789038		-12	0.826673
2018-10-06	527.1	590	0.89339	538	591.232	0.909965	520.9	589.75	0.883256	486.2	589.387	0.824926		-11	0.779502
2018-10-07	520.7	590	0.882542	526	588.945	0.893123	500.1	589.356	0.848553	435.1	590.761	0.736508		-10	0.84573
2018-10-08	535.2	590	0.907119	545.7	589.242	0.926106	503.3	588.724	0.854899	491.5	589.222	0.83415		-9	0.876949
2018-10-09	502.6	590	0.851864	530.7	590.493	0.898741	529.6	588.78	0.899486	486.2	591.105	0.822527		-8	0.84306
2018-10-10	528.3	590	0.895424	550.7	590.145	0.933161	521.5	590.796	0.882707	485.1	589.465	0.822949		-7	0.869382
2018-10-11	509.6	590	0.863729	545.2	589.758	0.924446	520.2	590.55	0.880874	500.8	589.684	0.849268		-6	0.874579
2018-10-12	527.3	590	0.893729	538.3	589.175	0.913651	516.7	590.443	0.875105	511.3	590.051	0.866535		-5	0.86963
2018-10-13	519.4	590	0.880339	549.3	590.622	0.930036	523.9	590.51	0.887199	524	589.447	0.888968		-4	0.904695
2018-10-14	510	590	0.864407	554.6	589.952	0.940076	549.1	589.381	0.931655	522.3	589.648	0.885782		-3	0.901834
2018-10-15	514.8	590	0.872542	534.7	590.637	0.905293	539.7	590.146	0.91452	530.5	590.444	0.898476		-2	0.908253
2018-10-16	538.6	590	0.912881	560.6	590.092	0.950021	544.9	590.909	0.922138	472.2	589.206	0.801417		-1	0.907617
2018-10-17	527	590	0.89322	543.7	591.005	0.919959	536.2	591.159	0.907031	509.2	591.302	0.86115		0	0.934806
2018-10-18	536.6	590	0.909492	548	590.529	0.927982	518.2	588.693	0.880254	514.4	589.84	0.872102		1	0.885196
2018-10-19	533.2	590	0.903729	560.7	588.804	0.95227	560.2	590.381	0.948879	509.1	590.27	0.862486		2	0.906354
2018-10-20	514.5	590	0.872034	556.5	590.874	0.941826	535	589.279	0.907889	490.6	588.802	0.833217		3	0.897139
2018-10-21	557.2	590	0.944407	542	590.583	0.917738	530	589.31	0.899356	514	589.263	0.872276		4	0.912349
2018-10-22	535.4	590	0.907458	538.8	589.803	0.913525	557.4	588.857	0.946579	511.5	589.43	0.867787		5	0.911156
2018-10-23	540.6	590	0.916271	553.3	591.165	0.935948	558.5	589.147	0.947981	517.1	589.624	0.877		6	0.908986
2018-10-24	530.6	590	0.899322	547.2	589.757	0.927839	538.1	589.469	0.912856	489.3	589.222	0.830417		7	0.910018
2018-10-25	532	590	0.901695	526	589.01	0.893024	556.6	589.289	0.944528	459.1	590.778	0.777111		8	0.910037
2018-10-26	517.8	590	0.877627	546.7	590.676	0.925549	554.4	590.048	0.939584	456.1	590.718	0.772111		9	0.905999
2018-10-27	524.5	590	0.888983	514.1	591.066	0.869784	561.1	589.619	0.951631	475.5	591.209	0.804284		10	0.884301
2018-10-28	519.2	590	0.88	506.4	589.794	0.858605	560.5	591.274	0.947954	478.5	590.707	0.810047		11	0.867404
2018-10-29	519.1	590	0.879831	495.5	591.282	0.83801	551.8	588.852	0.937078	492.2	589.457	0.835006		12	0.887102
2018-10-30	514.6	590	0.872203	508.5	588.571	0.863956	549.3	589.712	0.931472	488.4	591.141	0.826198		13	0.852289
2018-10-31	496.4	590	0.841356	526.3	589.444	0.892875	518.2	590.854	0.877035	486.8	589.686	0.825524		14	0.8557
2018-11-01	488.2	590	0.827458	502.3	590.737	0.850294	516.5	591.307	0.873489	494.6	590.106	0.838155		15	0.851651
2018-11-02	505.9	590	0.857458	493.9	589.309	0.838101	526.3	590.854	0.890744	503	590.378	0.851996		16	0.863643
2018-11-03	511.5	590	0.866949	519.3	589.949	0.880246	531.5	589.606	0.90145	491.4	590.549	0.832106		17	0.884565
2018-11-04	504.1	590	0.854407	518.1	589.333	0.879129	543.7	589.272	0.922664	493.6	588.703	0.838454		18	0.867249
2018-11-05	506.8	590	0.858983	513.3	591.25	0.868161	530.9	590.245	0.899457	495.8	590	0.840339		19	0.861015
2018-11-06	501	590	0.849153	507.1	590.313	0.859037	537.6	588.932	0.912839	498	589.786	0.844374		20	0.873857
2018-11-07	499	590	0.845763	528	590.051	0.894839	533.8	591.225	0.90287	501.4	589.385	0.850717		21	0.870553
2018-11-08	512.6	590	0.868814	516.8	590.476	0.875226	527.1	590.792	0.892192	480	591.13	0.812004		22	0.866577
2018-11-09	516.2	590	0.874915	525.6	589.794	0.891159	522.7	589.158	0.887198	466	590.337	0.78938		23	0.858283
2018-11-10	516.9	590	0.876102	493.1	588.848	0.837398	510.8	590.455	0.865096	469.5	589.943	0.79584		24	0.859569
2018-11-11	503.7	590	0.853729	520.6	590.515	0.881603	515.2	590.918	0.871863	466.9	588.681	0.793129		25	0.852543
2018-11-12	500.7	590	0.848644	498.9	589.626	0.84613	526	589.01	0.893024	487	588.418	0.827643		26	0.864867
2018-11-13	512.4	590	0.868475	487.5	589.73	0.82665	534.6	589.024	0.907602	469.2	590.114	0.7951		27	0.84068
2018-11-14	485.8	590	0.82339	487.6	591.374	0.824521	525.5	589.447	0.891513	468	590.109	0.793073		28	0.86693
2018-11-15	487	590	0.825424	489.6	588.859	0.831439	526.1	590.099	0.891545	494.1	589.532	0.838122		29	0.839293
2018-11-16	494.1	590	0.837458	483.9	590.335	0.819704	517.4	590.202	0.876649	463.2	589.337	0.785967		30	0.82466
2018-11-17	477.1	590	0.808644	496.8	590.489	0.841336	504.1	590.104	0.854257	434.4	590.361	0.73582		31	0.843502
2018-11-18	468.1	590	0.79339	489.1	589.405	0.829819	511.1	588.918	0.867863	440.8	588.678	0.748796		32	0.821799
2018-11-19	476.2	590	0.807119	498.2	589.309	0.845398	499.7	589.275	0.847992	440.7	589.167	0.748006		33	0.802787
2018-11-20	470.2	590	0.796949	491.4	588.811	0.834563	502.6	589.326	0.852838	480.5	591.477	0.812373		34	0.801293
2018-11-21	484.8	590	0.821695	478.1	588.462	0.812458	478.8	588.389	0.813748	468.9	590.682	0.793828		35	0.813326
2018-11-22	464.4	590	0.787119	491.9	589.626	0.834258	509.2	590.615	0.862152	469.6	591.143	0.794393		36	0.8425
2018-11-23				483.4	590.824	0.818179	514.3	591.333	0.869729	470.6	590.595	0.796823		37	0.836572
2018-11-24				486.6	588.978	0.826176	519.4	589.34	0.881325	444.2	590.174	0.752659		38	0.824663
2018-11-25				479.9	589.503	0.814076	510.9	589.179	0.867138	454	589.659	0.769936		39	0.841731
2018-11-26				463.4	590	0.785424	526.9	589.3	0.894112	462.6	590.345	0.78361		40	0.811103
2018-11-27				455.9	591.552	0.770685	507.6	588.542	0.862471	465.8	590.299	0.789091		41	0.822578
2018-11-28				451.9	588.895	0.767369	513.1	588.673	0.871621	443.3	589.27	0.752287		42	0.817805
2018-11-29				456	590.171	0.772657	506	591.309	0.855729	470.8	590.739	0.796968		43	0.808037
2018-11-30				448	591.561	0.757319	500.9	589.574	0.849596	465.9	589.701	0.790062		44	0.776234
2018-12-01				447.3	589.598	0.758653	475.2	589.777	0.805729	443.7	589.226	0.753022		45	0.809057
2018-12-02				438	590.529	0.741707	509.3	590.265	0.862833	441.8	588.833	0.750297		46	0.807647
2018-12-03				431.3	590.422	0.730495	506.5	588.802	0.860221	474.3	591.2	0.802267		47	0.786385
2018-12-04				444.1	588.333	0.754844	500.8	590	0.848814	370.5	589.198	0.628821		48	0.775514
2018-12-05				437.8	590.592	0.74129	482.6	590.27	0.817592	424.2	589.76	0.719275		49	0.787094
2018-12-06				440.9	589.527	0.747888	483.5	591.576	0.817308	445.1	590.592	0.753651		50	0.732931
2018-12-07				446.4	590.119	0.756458	494.8	589.415	0.839477	455.3	590.237	0.771385		51	0.770463
2018-12-08				439.9	591.687	0.743468	493.9	589.894	0.83727	447.5	589.884	0.758624		52	0.786272
2018-12-09				447.4	591.228	0.75673	510.9	591.406	0.863873	467.6	590.343	0.792082		53	0.784546
2018-12-10				449.5	588.882	0.76331	492.1	589.791	0.834364	474.1	588.364	0.805794		54	0.787202
2018-12-11				444.9	588.876	0.755507	498.7	589.115	0.846525	439.6	590.914	0.743932		55	0.793853
2018-12-12				424.9	590.976	0.718981	498	588.646	0.84601	475.4	589.112	0.806977		56	0.803323
2018-12-13				450.5	591.657	0.761421	499.5	589.418	0.847446	461	588.562	0.783264		57	0.781563
2018-12-14				442.2	588.631	0.751235	494.9	590.963	0.837447	430.5	590.062	0.729584		58	0.799145
2018-12-15				445.3	589.048	0.755966	491.8	589.016	0.834951	421.3	588.889	0.715415		59	0.775293
2018-12-16				438.9	589.091	0.745046	486.3	590.432	0.823634	424	590.062	0.718569		60	0.775677
2018-12-17				456.2	589.364	0.774055	494.2	591.129	0.836027	430.2	589	0.73039		61	0.764353
2018-12-18				457.5	589.306	0.776336	488.3	590.87	0.826409	423.5	590.12	0.71765		62	0.77637
2018-12-19				453	591.047	0.766437	503.3	588.947	0.854576	440.7	591.062	0.745606		63	0.772592
2018-12-20				472.3	589.545	0.801126	498	591.211	0.84234	431.8	588.841	0.733304		64	0.777801
2018-12-21				470.7	588.708	0.799548	495.8	589.048	0.841698	432.5	588.344	0.735115		65	0.787643
2018-12-22				459.5	589.086	0.780022	495.7	589.427	0.840986	434.9	589.29	0.738006		66	0.777089
2018-12-23				457.6	590.058	0.775517	490.6	590	0.831525	409.9	591.118	0.693432		67	0.789608
2018-12-24				460.3	591.512	0.778176	490.2	588.77	0.832583	430.7	589.24	0.730942		68	0.783855
2018-12-25				427.9	588.589	0.726993	481.2	591.148	0.81401	454.7	588.405	0.772767		69	0.784967
2018-12-26				436.4	591.235	0.738117	520.9	590.96	0.881448	432.4	591.835	0.730608		70	0.774827
2018-12-27				431.5	591.25	0.72981	482.5	589.838	0.818021	423.4	588.75	0.719151		71	0.785041
2018-12-28				465.7	588.757	0.790988	474.6	590.166	0.804181	428.6	589.875	0.726595		72	0.75529
2018-12-29				447.3	591.31	0.756457	477.1	590.273	0.80827	431.3	589.188	0.732025		73	0.756136
2018-12-30				479.1	590.497	0.81135	478	589.293	0.811141	432.3	590.184	0.732483		74	0.760165
2018-12-31				466.5	589.489	0.791364	486.7	590.591	0.824089	432.2	591.728	0.730403		75	0.784753
2019-01-01				465.1	591.322	0.786543	490.7	590.319	0.831245	433.4	591.579	0.732616		76	0.768032
2019-01-02				457.8	590.462	0.775325	482	591.297	0.815157	403.4	589.938	0.683801		77	0.782916
2019-01-03				434.4	589.701	0.736645	475.6	589.348	0.806994	426.6	589.416	0.723768		78	0.775734
2019-01-04				435.5	591.369	0.736427	474.9	591.243	0.803223	399.4	590.848	0.675977		79	0.759135
2019-01-05				443.3	588.393	0.753408	476.9	590.909	0.807062	430.9	588.951	0.73164		80	0.771236
2019-01-06				429.1	600.494	0.714579	481.9	591.568	0.814615	427.8	590.125	0.724931		81	0.755938
2019-01-07				433.8	600.182	0.722781	503.4	588.639	0.855193	422.5	590.382	0.715638		82	0.777816
2019-01-08				432.9	599.268	0.722381	511.3	590.838	0.865381	416.8	589.08	0.707544		83	0.77391
2019-01-09				431.3	598.242	0.720945	496.3	588.457	0.843391	428	590.537	0.724764		84	0.752764
2019-01-10				424.1	598.405	0.708717	489.6	591.25	0.828076	392.6	588.553	0.66706		85	0.756569
2019-01-11				450	601.579	0.748031	494.7	589.362	0.839383	397.6	588.562	0.675545		86	0.755596
2019-01-12				458.7	598.457	0.766471	483.9	590.378	0.819644	377.3	589.643	0.639879		87	0.732229
2019-01-13				442.8	600.536	0.737342	478.1	591.209	0.808682	354.6	590.139	0.600876		88	0.721698
2019-01-14				437.8	598.263	0.731785	459.5	588.475	0.780832	363.2	589.048	0.616589		89	0.71575
2019-01-15				416.1	601.75	0.691483	448.1	590.117	0.759341	363.7	591.486	0.614891		90	0.675402
2019-01-16				413.9	601.72	0.687862	389.2	590.719	0.658858	367.9	590.19	0.623359		91	0.71055
2019-01-17				410.2	601.019	0.682507	458.3	589.286	0.777721	397.5	588.354	0.675613		92	0.692386
2019-01-18				424.5	601.375	0.705882	431.2	590.296	0.730481	394.9	590	0.669322		93	0.686254
2019-01-19				451.3	600.888	0.751056	439	590.116	0.743921	396.3	588.994	0.672842		94	0.693792
2019-01-20				448.6	601.497	0.745806	422.3	588.242	0.717901	389.6	588.846	0.661633		95	0.681119
2019-01-21				443	600.976	0.737135	407.1	588.696	0.691529	387	588.354	0.657767		96	0.688502
2019-01-22				437.4	600.536	0.72835	404.9	589.562	0.68678	387.6	589.308	0.65772		97	0.696385
2019-01-23				444.7	600.714	0.740285	398.5	589.091	0.676466	387.1	590.549	0.655492		98	0.68442
2019-01-24				444.1	599.704	0.740532	384	591.053	0.649688	402.6	591.582	0.680548		99	0.681182
2019-01-25				439.2	598.373	0.73399	382.3	589.342	0.648689	391	588.552	0.664343		100	0.667382
2019-01-26				423.4	598.519	0.707413	365.9	591.781	0.618303	364.8	588.207	0.62019		101	0.687233
2019-01-27				414	599.937	0.690073	379.3	591.854	0.640867	365.4	591.259	0.618004		102	0.672374
2019-01-28				386.8	598.411	0.646379	361.1	589.793	0.612249	364.8	590.78	0.617489		103	0.652064
2019-01-29				388.4	600.196	0.647122	356.1	591.517	0.602011	354.6	591.655	0.599336		104	0.644346
2019-01-30				373.5	598.553	0.624005	359	590.828	0.607622	355.9	591.301	0.601893		105	0.641367
2019-01-31				379	598.896	0.632831	364.8	591.689	0.61654	361.8	588.344	0.614946		106	0.613487
2019-02-01				379.5	600.387	0.632092	350.9	590	0.594746	389.8	590.903	0.659669		107	0.611234
2019-02-02				383.5	599.742	0.639442	345.5	590.915	0.584686	369.9	588.38	0.628675		108	0.612256
2019-02-03				386.1	598.981	0.644595	353	590.483	0.597816	362.7	589.72	0.615037		109	0.628752
2019-02-04				388.3	601.126	0.645955	349.3	588.288	0.593757	368.1	590.559	0.623307		110	0.626728
2019-02-05				362.4	600.685	0.603311	364.5	588.456	0.619417	361.1	587.986	0.61413		111	0.61262
2019-02-06				360.6	600.897	0.600103	344.4	590.352	0.583381	358.8	588.31	0.609883		112	0.61549
2019-02-07				374.3	598.533	0.625362	340.9	589.214	0.578567	360.5	590.638	0.610357		113	0.60396
2019-02-08				365	598.69	0.609665	325.6	590.075	0.551795	365.3	591.583	0.617496		114	0.593374
2019-02-09				371.2	600.493	0.618159	335.1	591.079	0.566929	351.9	588.169	0.598297		115	0.58135
2019-02-10				386.7	599.346	0.645203	313.8	588.092	0.53359	364.5	589.504	0.618317		116	0.586344
2019-02-11				380.3	600.676	0.63312	303.8	588.56	0.516175	360.9	590.417	0.611263		117	0.583528
2019-02-12				387	600.667	0.644284	319.9	589.545	0.542621	368.2	590.414	0.62363		118	0.596362
2019-02-13				377.5	600.405	0.628742	326	589.927	0.552611	366.2	589.493	0.621212		119	0.601518
2019-02-14				376.1	601.301	0.625477	323.9	590.963	0.548088	348.4	589.645	0.590864		120	0.614192
2019-02-15				383.7	599.934	0.639571	346.6	591.643	0.585826	353.5	589.034	0.600135		121	0.609903
2019-02-16				382.7	600.204	0.637616	333.3	590.735	0.564212	357.9	589.22	0.607413		122	0.592272
2019-02-17				372	601.944	0.617997	329	590.441	0.55721	352.9	589.565	0.598577		123	0.589427
2019-02-18				363.9	599.214	0.607295	319.4	588.571	0.54267	346.4	592.164	0.584973		124	0.591606
2019-02-19				386.8	601.944	0.642584	311.1	589.389	0.527834	339.1	590.438	0.574319		125	0.584406
2019-02-20				396.3	600.479	0.659973	306	591.846	0.517026	342.7	588.071	0.582752		126	0.571922
2019-02-21				404	601.141	0.672055	301.5	587.955	0.512795	356.8	589.552	0.605205		127	0.565692
2019-02-22				397.6	601.486	0.661029	304.7	591.119	0.515463	335.9	590.73	0.568619		128	0.579521
2019-02-23				393.3	598.716	0.656906	303.9	592.137	0.513225	348.5	590	0.590678		129	0.595063
2019-02-24				410.3	600.455	0.683316	307	590.373	0.52001	355.3	588.671	0.603563		130	0.58815
2019-02-25				360.8	600.075	0.601259	309.9	591.667	0.523775	354.1	590.476	0.599685		131	0.598408
2019-02-26				357.7	598.134	0.598026	320	588.759	0.543516	380.5	589.437	0.645532		132	0.602598
2019-02-27				346.9	599.692	0.578463	322.8	589.776	0.547326	356.7	589.281	0.605314		133	0.615344
2019-02-28				329.8	600.4	0.5493	331.9	589.489	0.56303	348.1	591.729	0.588276		134	0.543656
2019-03-01				341.4	601.923	0.567182	312.7	589.389	0.530549	345.4	591.221	0.584214		135	0.585295
2019-03-02				346.3	598.409	0.578701	325.6	589.275	0.552543	334.6	590.368	0.566765		136	0.572168
2019-03-03				344.5	602	0.572259	324.2	589.706	0.549766	353.3	591.045	0.597755		137	0.555771
2019-03-04				345.5	601.527	0.574372	314.9	589.924	0.533797	337.9	590.31	0.572411		138	0.55292
2019-03-05				348.8	600.833	0.580527	310	590.687	0.524813	326.7	588.593	0.555053		139	0.576263
2019-03-06				352.4	599.023	0.588292	326.9	591.852	0.552334	337.5	588.947	0.573056		140	0.565414
2019-03-07				354.6	598.582	0.5924	324.3	587.956	0.551572	341.9	588.837	0.580636		141	0.56586
2019-03-08				348	598.421	0.58153	335.5	590.507	0.568156	334.4	590.738	0.566072		142	0.567709
2019-03-09				365.5	600.922	0.608232	323.9	589.398	0.549543	320.4	590.853	0.542267		143	0.577564
2019-03-10				360.1	599.64	0.600527	332	588.897	0.563766	336.3	587.863	0.572072		144	0.569769
2019-03-11				365.8	601.471	0.608176	323.9	588.015	0.550837	336.6	591.429	0.56913		145	0.557997
2019-03-12				364.4	600.714	0.606611	325.6	591.791	0.550194	332.8	590.32	0.563762		146	0.579277
2019-03-13				359.5	599.854	0.599312	328.4	589.03	0.557527	325.8	588.25	0.553846		147	0.571169
2019-03-14				354.6	600.074	0.590928	320	588.397	0.543851	313.4	587.68	0.533283		148	0.56503
2019-03-15				354.1	599.781	0.590382	308	588.74	0.523151	321.8	588.889	0.546453		149	0.568764
2019-03-16				356	599.63	0.5937	322.5	590.84	0.545833	332.8	590.48	0.563609		150	0.558202
2019-03-17				357.6	601.618	0.594397	319	588.55	0.54201	320	587.68	0.544514		151	0.558913
2019-03-18				363.1	599.489	0.605682	317.6	588.846	0.53936	316.6	589.431	0.537128		152	0.561337
2019-03-19				365.1	601.103	0.607383	313.4	591.298	0.530021	321.7	588.621	0.546532		153	0.563513
2019-03-20				377.6	599.507	0.629851	326.8	591.679	0.552326	299.1	587.967	0.508702		154	0.546017
2019-03-21				365.3	599.786	0.609051	299.7	591.68	0.506524	323.8	590.894	0.547983		155	0.561571
2019-03-22				364.2	599.565	0.60744	313.3	588.359	0.532498	324.7	588.115	0.552103		156	0.548224
2019-03-23				346.2	599.47	0.57751	311.2	588.74	0.528586	319.3	589.008	0.542098		157	0.569037
2019-03-24				361.8	599.124	0.603882	312.4	590.238	0.529278	316.7	587.826	0.538765		158	0.560478
2019-03-25				365.4	599.185	0.609828	307.6	591.22	0.520281	303.5	588.174	0.516004		159	0.560324
2019-03-26				314.3	599.167	0.524562	314	590.853	0.531435	291.1	587.5	0.495489		160	0.557833
2019-03-27				334	597.744	0.558767	329.1	590.606	0.557224	295.7	588.443	0.502513		161	0.559037
2019-03-28				305.5	598.718	0.510257	329.1	590.606	0.557224	313.5	587.899	0.533255		162	0.553499
2019-03-29				338.3	600.394	0.563464	327.45	589.808	0.555181	302.9	588.099	0.515049		163	0.527419
2019-03-30				329.3	600.569	0.548313	327.45	589.808	0.555181	313.6	588.254	0.533103		164	0.541399
2019-03-31				330.3	599.528	0.550934	313.25	588.622	0.532175	325.4	588.333	0.553088		165	0.51916
2019-04-01				328.1	600.24	0.546615	313.25	588.622	0.532175	314.8	590.873	0.532771		166	0.550777
2019-04-02				331.9	599.444	0.553679	327.65	589.549	0.555764	320.6	592.24	0.541335		167	0.552388
2019-04-03				337.7	601.318	0.5616	327.65	589.549	0.555764	321.3	590	0.544576		168	0.558781
2019-04-04				348	601.136	0.578904	349.55	589.82	0.592638	334.5	589.627	0.567308		169	0.560196
2019-04-05				332.9	602.047	0.552947	349.55	589.82	0.592638	339.5	590.472	0.574963		170	0.556858
2019-04-06				334.5	598.661	0.558747	338.6	591.63	0.572318	324.5	589.403	0.550557		171	0.578709
2019-04-07				338.3	600.709	0.563168	357.5	588.75	0.607219	344.1	588.14	0.585065		172	0.586326
2019-04-08				335.5	599.308	0.559813	358.2	591.958	0.60511	330.8	592.114	0.558676		173	0.570028
2019-04-09				337.9	598.837	0.56426	356.8	588.214	0.606582	320.5	587.731	0.545317		174	0.591349
2019-04-10				345.7	600.923	0.575282	372.5	591.049	0.630235	308.2	588.678	0.523546		175	0.587716
2019-04-11				344.1	598.923	0.574531	378.9	590.828	0.641304	308.5	591.953	0.521156		176	0.576266
2019-04-12				347.5	601.085	0.578121	367.3	588.936	0.623667	329.2	591.811	0.556259		177	0.570311
2019-04-13				336.5	600.157	0.560686	368	590.571	0.623125	325.9	589.766	0.552592		178	0.576862
2019-04-14				346.2	601.484	0.575576	374.5	590.556	0.634149	330.3	591.24	0.558656		179	0.588494
2019-04-15				319.6	602.437	0.530512	374.6	590.208	0.634691	329.3	591.88	0.556363		180	0.583981
2019-04-16				348.2	600.992	0.579375	365.6	588.511	0.621229	341.1	588.397	0.579711		181	0.580353
2019-04-17				340.2	599.213	0.567745	366.9	590.141	0.621716	335.8	588.08	0.571011		182	0.589159
2019-04-18				342.3	602.047	0.56856	375.8	591.31	0.635538	325	587.969	0.55275		183	0.579643
2019-04-19				331.3	600.484	0.551722	372	591.69	0.628707	333.3	589.847	0.565061		184	0.588723
2019-04-20				343	599.606	0.572042	362.3	588.357	0.615782	338.7	587.717	0.576298		185	0.582203
2019-04-21				344.3	598.295	0.575469	369.1	589.51	0.626113	328.7	591.484	0.555721		186	0.584114
2019-04-22				344.9	599.457	0.575354	365	589.928	0.61872	323.6	589.748	0.548709		187	0.588109
2019-04-23				329.3	598.72	0.550007	375.6	590.282	0.636306	295.7	590.579	0.500695		188	0.585687
2019-04-24				343.2	600.234	0.571777	372	591.135	0.629298	304.2	591.892	0.513945		189	0.578605
2019-04-25				343.2	599.535	0.572444	361	590.221	0.611636	277.7	588.291	0.472046		190	0.566612
2019-04-26				350.6	599.015	0.585294	367.5	589.143	0.623788	302.4	589.758	0.512753		191	0.568292
2019-04-27				335.6	601.04	0.558365	378.1	589.931	0.640923	319.8	591.15	0.540979		192	0.556996
2019-04-28				346.4	602.137	0.575284	369.3	588.841	0.627165	292.8	592.544	0.494141		193	0.565463
2019-04-29				343.5	597.734	0.57467	359.6	588.358	0.611192	291.1	587.982	0.495083		194	0.575632
2019-04-30				339.7	601.811	0.564463	354	589.389	0.600622	291.5	589.573	0.494426		195	0.549708
2019-05-01				353.4	602.164	0.586883	351.6	589.323	0.596616	297.1	591.724	0.502092		196	0.556363
2019-05-02				335.2	602.258	0.556572	352.3	588.421	0.598721	214.1	592.396	0.361414		197	0.557384
2019-05-03				335.8	598.268	0.561287	356.9	591.818	0.603057	240.6	591.183	0.406981		198	0.559551
2019-05-04				349.3	600.769	0.581421	361	589.774	0.612098	231.5	587.303	0.394174		199	0.589028
2019-05-05				348.5	599.618	0.581203	373.8	588.043	0.635667	222	587.7	0.377744		200	0.517652
2019-05-06				418.8	599.61	0.698454	348.7	591.615	0.589403	252.3	587.449	0.429484		201	0.50908
2019-05-07				387.8	598.658	0.647783	337	589.389	0.571778	243.9	587.5	0.415149		202	0.513023
2019-05-08				262.8	601.474	0.436927	341.7	589.237	0.579903	242.1	592.577	0.408554		203	0.531794
2019-05-09				295.5	602.056	0.490818	345.6	591.077	0.584695	247.9	590	0.420169		204	0.505715
2019-05-10				410.7	599.419	0.685163	343.7	589.692	0.582846	251.2	588.119	0.427125		205	0.551229
2019-05-11				259.4	603.152	0.430074	353.1	591.111	0.59735	253.9	587.849	0.431913		206	0.485614
2019-05-12				370.4	599.504	0.617845	354.7	591.418	0.599745	234.7	589.688	0.398007		207	0.507461
2019-05-13				253.6	597.742	0.424263	355.5	588.148	0.60444	243.9	593.258	0.411119		208	0.519882
2019-05-14				373.1	601.338	0.62045	350.3	589.318	0.594416	222.9	590.316	0.377595		209	0.471755
2019-05-15				222.7	598.916	0.371839	347.2	591.298	0.587183	239.95	590.316	0.406477		210	0.529403
2019-05-16				289	599.615	0.481976	330	590.081	0.559246	239.95	589.755	0.406864		211	0.453751
2019-05-17				223.1	598.795	0.372581	329.6	589.206	0.559397	260	589.755	0.440861		212	0.457146
2019-05-18				205.4	596.538	0.34432	292.6	591.852	0.49438	260	592.967	0.438473		213	0.416778
2019-05-19				202.5	602.785	0.335941	279.1	591.776	0.471631	230.7	592.967	0.38906		214	0.469629
2019-05-20				182.4	603.194	0.30239	286.5	589.444	0.486051	230.7	586.522	0.393336		215	0.410184
2019-05-21				158.5	600.323	0.264025	246.5	587.609	0.419497	181.4	586.522	0.309281		216	0.382605
2019-05-22				104.3	605.921	0.172135	243.9	588.511	0.414436	181.4	582.885	0.311211		217	0.380169
2019-05-23				104.3	605.921	0.172135	178	589.242	0.302083	65.35	582.885	0.112115		218	0.321366
2019-05-24				91.2	598.143	0.152472				65.35				219	0.303148
2019-05-25				91.2	598.143	0.152472								220	0.157655
2019-05-26				97.9	597.105	0.163958								221	0.1587
2019-05-27				97	601.111	0.161368								222	0.139038
2019-05-28				97	601.111	0.161368								223	0.139038
2019-05-29				80.15	600.323	0.133512								224	0.150523
2019-05-30				80.15	600.323	0.133512								225	0.147934
2019-05-31				59.4	600.87	0.0988567								226	0.147934
2020-05-31														227	0.120077
														228	0.120077
														229	0.085422

## Sheet: Milk Urea
Date	Tatua 78306 2021/22 Milk Urea (3d avg)		Tatua 78306 2020/21 Milk Urea (3d avg)		Tatua 78306 2019/20 Milk Urea (3d avg)		Tatua 78306 2018/19 Milk Urea (3d avg)			Means
2018-07-23							14.3	-84		Term	Fitted Mean
2018-07-24							14.3			Year
2018-07-25							13.1			2018	26.094
2018-07-26			25.4	-84			13.1			2019	25.763
2018-07-27	15.3	-86	25.4				13.2			2020	28.691
2018-07-28	15.3		25		9.1	-83	13.2			Days from peak
2018-07-29	13.1		25		9.1		13.4			-84	15.06
2018-07-30	13.1		23.2		8.2		13.4			-83	12.62
2018-07-31	12.7		23.2		8.2		15			-82	15.73
2018-08-01	13.1		23.8		8.9		15			-81	15.43
2018-08-02	13.1		23.8		8.9		14.2			-80	14.87
2018-08-03	16.4		24.6		8.5		14.2			-79	15.1
2018-08-04	20.2		24.6		8.8		15.4			-78	15.37
2018-08-05	20.2		25.1		8.8		15.4			-77	15.23
2018-08-06	20.2		25.1		8.5		15.9			-76	16.13
2018-08-07	20.2		23.5		9.5		15.9			-75	16.13
2018-08-08	18.4		23.5		9.5		15			-74	15.93
2018-08-09	18.4		21.7		11.4		15			-73	16.27
2018-08-10	17		21.7		11.4		15.4			-72	16.13
2018-08-11	17		19.3		11.1		15.4			-71	16.77
2018-08-12	15.9		17.7		11.1		19.9			-70	16.33
2018-08-13	15.4		16.3		10		19.9			-69	16.23
2018-08-14	12.9		15.7		8.5		23.3			-68	15.13
2018-08-15	12.9		14.9		8.1		23.3			-67	14.23
2018-08-16	12.5		13.2		10.6		23.7			-66	13.4
2018-08-17	11.5		11.6		12.4		23.7			-65	13.07
2018-08-18	11		10.3		14.4		19.5			-64	15.13
2018-08-19	10.9		11.8		14.3		19.5			-63	15.17
2018-08-20	13.2		15.5		12.1		20.3			-62	16.43
2018-08-21	14.2		18.3		10.4		20.3			-61	15.97
2018-08-22	15.4		18.2		9.7		21.4			-60	15.87
2018-08-23	14.6		17.7		9.9		21.4			-59	16.53
2018-08-24	15.4		17.2		10.5		23.2			-58	15.83
2018-08-25	15.7		19		14.1		23.2			-57	15.87
2018-08-26	15.6		18.7		15.9		21.8			-56	16.17
2018-08-27	15		21.2		18.1		20.2			-55	17.2
2018-08-28	15.9		20.1		18.7		18.6			-54	18.77
2018-08-29	18.2		20.2		19.7		20			-53	19.4
2018-08-30	18.7		19.5		18.6		21.6			-52	21.03
2018-08-31	20.4		19.7		16.1		24.7			-51	21
2018-09-01	19.2		20.2		13.6		26.9			-50	20.2
2018-09-02	20.9		22.5		14.6		26.9			-49	18.6
2018-09-03	19.5		24.2		15.5		26.8			-48	17.3
2018-09-04	20.4		23.8		18		24.3			-47	18.27
2018-09-05	19.6		22		15.8		22.8			-46	19.87
2018-09-06	17.8		22		17.6		19.2			-45	22.3
2018-09-07	12.9		23.7		19.3		20.1			-44	22.17
2018-09-08	9.6		22.2		21.5		21.2			-43	22.17
2018-09-09	11.1		21.4		18.8		24.5			-42	22.7
2018-09-10	14.3		19.1		18.9		23.8			-41	23.17
2018-09-11	12.8		19.1		22.7		23.7			-40	21.27
2018-09-12	9.2		19.3		25.9		21.4			-39	19.83
2018-09-13	6.6		23.1		26.3		20.4			-38	20.63
2018-09-14	9		25		26		19.8			-37	22.07
2018-09-15	10.2		27.9		27.1		19.2			-36	23.37
2018-09-16	11.3		28.4		29.3		21			-35	24.3
2018-09-17	9.4		31.6		28.5		21.2			-34	25.27
2018-09-18	9.4		32		28.6		22.2			-33	26.2
2018-09-19	9.8		30.9		28.5		20.6			-32	25.77
2018-09-20	11.3		28		29.4		21			-31	26.67
2018-09-21	12.7		25.4		30.3		18.6			-30	26.57
2018-09-22	14.7		23.9		29		19.7			-29	27.1
2018-09-23	15.9		24.8		29		19			-28	26.5
2018-09-24	19.3		25.2		28.5		21.6			-27	25.53
2018-09-25	21.6		25.2		27.5		23			-26	24.5
2018-09-26	25.1		24		24.9		26.5			-25	24.77
2018-09-27	25.5		24		21.7		27.3			-24	23.77
2018-09-28	26.3		26.4		22.2		26			-23	23.27
2018-09-29	24.8		27.9		23.9		23.9			-22	21.57
2018-09-30	24		30.2		27.1		25.5			-21	22.6
2018-10-01	22.3		30.6		27.4		28			-20	24.43
2018-10-02	21.8		30		27.8		28.8			-19	27.17
2018-10-03	20.8		28.7		27.2		25.1			-18	28.3
2018-10-04	20.9		27		26.9		19.2			-17	28.13
2018-10-05	19.3		27		28.1		16.4			-16	27.03
2018-10-06	19.9		25.6		29		17.2			-15	27.03
2018-10-07	23.4		24.5		29.4		23.4			-14	27.7
2018-10-08	28.1		24.5		28.4		24.3			-13	28.27
2018-10-09	28.4		23.2		29.1		24.8			-12	26.7
2018-10-10	25.9		22.1		29.4		23.7			-11	24.03
2018-10-11	24.8		21.8		30.6		25.3			-10	23.33
2018-10-12	23.5		24		29		24.9			-9	23.27
2018-10-13	22.6		26.7		31.4		23.7			-8	25.37
2018-10-14	21.2		27.8		31.9		22.7			-7	25.03
2018-10-15	21.3		28.1		34.5		23.3			-6	26.73
2018-10-16	19.5		30.1		35.3		21.1			-5	27.43
2018-10-17	19		31.7		33.4		19.9			-4	29.2
2018-10-18	20.9		31.4		33		17.3			-3	29.43
2018-10-19	22.1		29.2		32.5		17.2			-2	29.07
2018-10-20	24		28.4		34		15.3			-1	29.13
2018-10-21	24.1		32		33.4		16.6			0	29.07
2018-10-22	25.8		34.9		31.9		20.6			1	28.1
2018-10-23	24		37.7		31.7		25.8			2	27.23
2018-10-24	22.7		37		31		30.3			3	27.07
2018-10-25	21.8		37.5		30.3		28.8			4	27.93
2018-10-26	24		37.9		28.7		28.2			5	28
2018-10-27	26.1		40.6		28.9		26.9			6	27.97
2018-10-28	27.5		41.5		28.9		27.6			7	28.93
2018-10-29			39.7		29		28.2			8	30.87
2018-10-30			39.2		26.1		26.9			9	33.27
2018-10-31	24.3		36.2		23.5		26			10	33.1
2018-11-01	23		38.3		23.4		25.1			11	31.33
2018-11-02	23.9		39.3		24.7		26.9			12	29.87
2018-11-03	26		42.5		25		26.4			13	29.07
2018-11-04	26.4		40.1		23.6		24.7			14	30.4
2018-11-05	22.5		35.4		23.5		22.7			15	30.4
2018-11-06	20.6		32.2		25.2		22.5			16	30.7
2018-11-07	19.8		31.6		27		24.1			17	29.57
2018-11-08	21.2		30.9		26.9		23.3			18	29.17
2018-11-09	21.9		30.5		27		25.1			19	28.53
2018-11-10	25.3		31.1		27.8		25.4			20	27.73
2018-11-11	29.4		32.1		27		25.5			21	26.87
2018-11-12	30.7		31.9		25		25.9			22	26.93
2018-11-13	30.2		30		23		25.4			23	27.4
2018-11-14	27.1		28.9		22.7		27.8			24	26.8
2018-11-15	28.2		27.8		23.3		30			25	26.67
2018-11-16	26.3		26.7		23.2		31.3			26	26.03
2018-11-17	27.5		26.6		22.3		32.3			27	25.9
2018-11-18	25.2		24.9		22.3		30.2			28	25.63
2018-11-19	27.5		24.7		24.1		28.5			29	24.8
2018-11-20	28.4		22.7		29.2		25.2			30	25.57
2018-11-21	28.1		23.9		29.4		22.3			31	26.33
2018-11-22	26.8		25		26.8		22.1			32	28.4
2018-11-23	24		26.4		23.9		22.4			33	28.13
2018-11-24	23.6		28		24.6		22			34	26.97
2018-11-25			26.9		25.6		20.8			35	25.8
2018-11-26			26.1		25.1		21.5			36	25.4
2018-11-27			26.5		24.7		25.6			37	25.3
2018-11-28			29.6		23.5		25.6			38	24.7
2018-11-29			34.1		22.7		24.3			39	24.4
2018-11-30			35.5		21.4		28.3			40	24
2018-12-01			34.5		21.6		28.5			41	24.37
2018-12-02			31.3		23.4		30.5			42	25.67
2018-12-03			27.2		26		28.1			43	27.57
2018-12-04			27.8		29.5		28.6			44	27.83
2018-12-05			27.2		29.5		29.6			45	27.2
2018-12-06			26.8		28.4		30.8			46	28.33
2018-12-07			25		28.6		29.3			47	28.6
2018-12-08			24.8		30.4		28.8			48	28.7
2018-12-09			25.9		33.6		26.6			49	27.83
2018-12-10			26.5		34.7		26.1			50	28
2018-12-11			26.6		33.9		24.7			51	29.33
2018-12-12			27.7		32.5		23.6			52	30.47
2018-12-13			27.7		30.7		23.9			53	29.9
2018-12-14			27.4		30.7		23.2			54	29.3
2018-12-15			26.4		29.3		25.3			55	28.33
2018-12-16			26.5		28.4		25.8			56	28.17
2018-12-17			27.2		26.6		27.2			57	27.13
2018-12-18			27.3		28.3		28.9			58	26.13
2018-12-19			26.1		31		31.2			59	25.67
2018-12-20			25.2		36.8		33.6			60	26.23
2018-12-21			23.9		37.8		31.8			61	27.87
2018-12-22			23		36.8		29			62	29.57
2018-12-23			22.4		32.8		25.6			63	30.07
2018-12-24			22.2		29.3		25.7			64	29.87
2018-12-25			23.4		29.3		29			65	29
2018-12-26			23.7		30.1		31.8			66	28.43
2018-12-27			23.4		31.1		32.8			67	27.77
2018-12-28			21.4		28.7		32.6			68	27.5
2018-12-29			21		28.3		31.5			69	26.8
2018-12-30			22.2		28.8		29.4			70	25.93
2018-12-31			22.4		30.5		27.2			71	26.23
2019-01-01			23		30.9		25.5			72	27.2
2019-01-02			23.4		30.6		25.3			73	28.5
2019-01-03			24.9		28.2		24			74	28.63
2019-01-04			25.8		26		25.2			75	28.37
2019-01-05			27.5		23.9		24.7			76	27
2019-01-06			32		23.1		26			77	26.03
2019-01-07			35.2		20.7		25.6			78	25.07
2019-01-08			36.9		20.4		27.3			79	25.3
2019-01-09			36.5		20.8		27.8			80	25.57
2019-01-10			36.9		20.9		26.2			81	26.93
2019-01-11			38.5		21.7		24.1			82	27.47
2019-01-12			39.9		21.4		24.9			83	27.8
2019-01-13			42.7		22.4		26.9			84	28.07
2019-01-14			43.9		22.8		30.2			85	29.07
2019-01-15			44.4		23.9		30.5			86	30.03
2019-01-16			44.5		24.5		32.7			87	30.57
2019-01-17			43.4		24.5		33.7			88	24.92
2019-01-18			41.1		24.8		34.4			89	25.62
2019-01-19			35.9		26.9		37			90	31.97
2019-01-20			33.4		28		38.4			91	32.8
2019-01-21			32		30.4		40.3			92	32.83
2019-01-22			31.3		30		42.1			93	32.2
2019-01-23			30		31.5		45.5			94	32.5
2019-01-24			30		31.4		45.9			95	32.13
2019-01-25			29.9		32.3		47.9			96	33.27
2019-01-26			31.4		34.7		50			97	33.27
2019-01-27			33		37.6		50.8			98	34.2
2019-01-28			35.9		38.9		50.4			99	35.57
2019-01-29			35.6		38.3		48.1			100	38.17
2019-01-30			37.2		35.6		43.7			101	39.27
2019-01-31			40.1		35.1		41.3			102	40.7
2019-02-01			44.2		34.1		38.3			103	40.4
2019-02-02			46.6		35.2		39			104	41.03
2019-02-03			46.4		37.3		34.7			105	41.53
2019-02-04			44.1		39.3		31.5			106	42.5
2019-02-05			44.4		41.1		30.9			107	42.53
2019-02-06			39.5		38.2		32.3			108	42.33
2019-02-07			38.1		35.7		34.5			109	41.17
2019-02-08			32.6		32.9		32.3			110	40.53
2019-02-09			32.8		34		31.3			111	36.63
2019-02-10			33		33.2		30.9			112	34.17
2019-02-11			33.7		32.1		32.7			113	32.5
2019-02-12			35.6		32.4		35.5			114	32.77
2019-02-13			39.5		34.1		37			115	33.2
2019-02-14			45.1		34.2		37.7			116	32.8
2019-02-15			47.2		29.5		36.9			117	33.67
2019-02-16			45.3		22.6		38.8			118	34.87
2019-02-17			42.6		17.1		38.7			119	35.77
2019-02-18			41.1		21.1		39.3			120	40.81
2019-02-19			37.4		26.9		40.7			121	40.61
2019-02-20			33.4		36.1		42.3			122	39.61
2019-02-21			32.9		38.5		40.1			123	34.97
2019-02-22			34.5		39.6		38.5			124	37.43
2019-02-23			37.3		39.1		37.6			125	36.87
2019-02-24			38.3		35.6		42			126	37.27
2019-02-25			39		33.7		42.2			127	38.1
2019-02-26			37		27.7		41.7			128	38.4
2019-02-27			35.6		28.1		39.8			129	37.37
2019-02-28			35.6		27		37.3			130	35.07
2019-03-01			36.2		28.4		36.7			131	34.23
2019-03-02			36		27.7		36.4			132	34.87
2019-03-03			36.3		27.8		38.8			133	35.4
2019-03-04			37.7		28.6		38.8			134	35.2
2019-03-05			38.1		28.5		35			135	34.53
2019-03-06			37.9		29.4		29.7			136	34.07
2019-03-07			38		29.6		27.6			137	34.3
2019-03-08			42		29.9		27			138	34.63
2019-03-09			43.4		30.1		28.7			139	35.43
2019-03-10			43.7		31		28.8			140	35.57
2019-03-11			42.6		29.8		29.9			141	35.7
2019-03-12			42		28.7		30.8			142	34.7
2019-03-13			38.7		27.4		30.8			143	33.7
2019-03-14			36.5		28.1		29			144	32.77
2019-03-15			36.6		27.5		30.9			145	32.7
2019-03-16			37.9		28.2		29.6			146	31.87
2019-03-17			38.8		28.1		29.7			147	31.3
2019-03-18			37.3		28.8		24.6			148	31.87
2019-03-19			37.3		30.2		24.4			149	32.27
2019-03-20			35		32.4		25.3			150	32.2
2019-03-21			33.6		32.6		26.7			151	32.8
2019-03-22			33.1		31.4		25.7			152	33.1
2019-03-23			29.1		28.4		22.4			153	32.43
2019-03-24			29.9		27.3		20.3			154	29.87
2019-03-25			29.2		25.2		22.5			155	28.63
2019-03-26			32.2		24.1		28			156	27.23
2019-03-27			30.5		25.3		24.9			157	27.27
2019-03-28			28.4		25.3		22.4			158	26.33
2019-03-29			27.9		27		19.4			159	26.63
2019-03-30			29.8		27		20.7			160	25.37
2019-03-31			32.5		28.9		22.1			161	25.97
2019-04-01			34.7		28.9		20.9			162	27.63
2019-04-02			35		27.2		19			163	27.87
2019-04-03			35		27.2		17.3			164	27.93
2019-04-04			33		24.6		20.5			165	27.1
2019-04-05			30.4		24.6		24.6			166	27.63
2019-04-06			28.1		23.6		25.4			167	27.23
2019-04-07			28		23.3		25.3			168	26.17
2019-04-08			27.2		23.8		22.7			169	24.33
2019-04-09			27		23.7		23.1			170	22.9
2019-04-10			25.6		26		22.8			171	24.1
2019-04-11			25.9		25.4		22.6			172	25.17
2019-04-12			25.2		26.2		22.2			173	26.13
2019-04-13			25.1		26		24			174	25.43
2019-04-14			26		26.6		25.5			175	24.93
2019-04-15			26.7		26.1		28.6			176	24.77
2019-04-16			26.5		25		25.7			177	24.83
2019-04-17			27.6		24.8		24.5			178	24.9
2019-04-18			30.9		21.1		23			179	24.63
2019-04-19			31		21		24.2			180	25.1
2019-04-20			31.4		20		24			181	24.73
2019-04-21			26.3		25.2		22.6			182	26.83
2019-04-22			26.3		27.7		21			183	25.57
2019-04-23			26		27.5		18.6			184	27.03
2019-04-24			26.5		26.9		21.9			185	25.67
2019-04-25			24		26.3		22			186	26
2019-04-26			21		24.7		26.1			187	25.63
2019-04-27			21.6		24.9		23.8			188	25.13
2019-04-28			23.5		25		25.4			189	23.23
2019-04-29			22.7		25.3		23.4			190	21.5
2019-04-30			20.3		25.6		20.9			191	22.83
2019-05-01			17.2		24.5		20.9			192	23.6
2019-05-02			16.9		23.1		21.1			193	24.8
2019-05-03			16.9		21.7		22.4			194	22.87
2019-05-04			18.9		19.6		21.4			195	21.9
2019-05-05			16.7		20.6		20.4			196	20.67
2019-05-06			17.1		21.5		22.7			197	19.13
2019-05-07			16.4		22.7		24.5			198	20.13
2019-05-08			17.2		23.1		27.6			199	19.77
2019-05-09			19.1		24.5		24.1			200	20.73
2019-05-10			20.7		25.5		19.8			201	20.3
2019-05-11			24.7		26.5		19.6			202	20.7
2019-05-12			21.8		26.9		20.1			203	22.43
2019-05-13			21.3		26.8		19.3			204	23.9
2019-05-14			20.5		27.4		15.4			205	26.4
2019-05-15			23		27.9		13.2			206	24.23
2019-05-16			26.2		28.7		13.2			207	22.83
2019-05-17			27.3		28.4		24.2			208	22.67
2019-05-18			30.6		25.5		24.2			209	23.93
2019-05-19			30.2		21.5		32.6			210	24.63
2019-05-20			30.5		20.8		32.6			211	22.73
2019-05-21			27.8		21.5		32.3			212	21.77
2019-05-22			27.8		23.2		32.3			213	21.4
2019-05-23			27.8		26		31.7			214	25.4
2019-05-24			25.3				31.7			215	25.07
2019-05-25			25.3							216	28.8
2019-05-26			25.7							217	29.66
2019-05-27			20.9							218	28.26
2019-05-28			20.9							219	28.26
2019-05-29			23.8							220	28.16
2019-05-30			23.8							221	25.76
2019-05-31			24.8							222	19.06
2020-05-31										223	21.96
										224	21.96
										225	22.96

## Sheet: MU alignment
	MU vs days				MU vs days from peak
	Means				Means
	Term	Fitted Mean	SE Mean		Term	Fitted Mean	SE Mean
	Year				Year
	2018	26.069	0.284		2018	26.094	0.276
	2019	25.634	0.288		2019	25.763	0.282
	2020	28.864	0.28		2020	28.691	0.275
	Days				Days from peak
-82	2	16.86	3.49		-84	15.06	4.8
-81	3	16.86	3.49		-83	12.62	3.39
-80	4	15.83	2.85		-82	15.73	2.77
-79	5	15.83	2.85		-81	15.43	2.77
-78	6	15.07	2.85		-80	14.87	2.77
-77	7	15.07	2.85		-79	15.1	2.77
-76	8	15.17	2.85		-78	15.37	2.77
-75	9	15.27	2.85		-77	15.23	2.77
-74	10	15.6	2.85		-76	16.13	2.77
-73	11	15.5	2.85		-75	16.13	2.77
-72	12	16.53	2.85		-74	15.93	2.77
-71	13	16.53	2.85		-73	16.27	2.77
-70	14	16.37	2.85		-72	16.13	2.77
-69	15	16.37	2.85		-71	16.77	2.77
-68	16	16.07	2.85		-70	16.33	2.77
-67	17	16.07	2.85		-69	16.23	2.77
-66	18	15.07	2.85		-68	15.13	2.77
-65	19	14.03	2.85		-67	14.23	2.77
-64	20	13.13	2.85		-66	13.4	2.77
-63	21	13.77	2.85		-65	13.07	2.77
-62	22	14.23	2.85		-64	15.13	2.77
-61	23	14.33	2.85		-63	15.17	2.77
-60	24	15.27	2.85		-62	16.43	2.77
-59	25	14.1	2.85		-61	15.97	2.77
-58	26	15.17	2.85		-60	15.87	2.77
-57	27	16.17	2.85		-59	16.53	2.77
-56	28	17.3	2.85		-58	15.83	2.77
-55	29	17.47	2.85		-57	15.87	2.77
-54	30	17.1	2.85		-56	16.17	2.77
-53	31	17.53	2.85		-55	17.2	2.77
-52	32	19.13	2.85		-54	18.77	2.77
-51	33	19.23	2.85		-53	19.4	2.77
-50	34	20.77	2.85		-52	21.03	2.77
-49	35	20.03	2.85		-51	21	2.77
-48	36	19.83	2.85		-50	20.2	2.77
-47	37	18.77	2.85		-49	18.6	2.77
-46	38	18.7	2.85		-48	17.3	2.77
-45	39	18.63	2.85		-47	18.27	2.77
-44	40	19.7	2.85		-46	19.87	2.77
-43	41	20	2.85		-45	22.3	2.77
-42	42	21	2.85		-44	22.17	2.77
-41	43	22	2.85		-43	22.17	2.77
-40	44	23.47	2.85		-42	22.7	2.77
-39	45	23.13	2.85		-41	23.17	2.77
-38	46	22.63	2.85		-40	21.27	2.77
-37	47	22.8	2.85		-39	19.83	2.77
-36	48	22.6	2.85		-38	20.63	2.77
-35	49	21.53	2.85		-37	22.07	2.77
-34	50	21.8	2.85		-36	23.37	2.77
-33	51	23.8	2.85		-35	24.3	2.77
-32	52	26.27	2.85		-34	25.27	2.77
-31	53	26.73	2.85		-33	26.2	2.77
-30	54	26.9	2.85		-32	25.77	2.77
-29	55	27.17	2.85		-31	26.67	2.77
-28	56	27.27	2.85		-30	26.57	2.77
-27	57	27	2.85		-29	27.1	2.77
-26	58	25.4	2.85		-28	26.5	2.77
-25	59	25.13	2.85		-27	25.53	2.77
-24	60	24.53	2.85		-26	24.5	2.77
-23	61	24.83	2.85		-25	24.77	2.77
-22	62	23.57	2.85		-24	23.77	2.77
-21	63	22.63	2.85		-23	23.27	2.77
-20	64	21.6	2.85		-22	21.57	2.77
-19	65	22.53	2.85		-21	22.6	2.77
-18	66	24.17	2.85		-20	24.43	2.77
-17	67	25.63	2.85		-19	27.17	2.77
-16	68	27	2.85		-18	28.3	2.77
-15	69	28.1	2.85		-17	28.13	2.77
-14	70	28.07	2.85		-16	27.03	2.77
-13	71	27.6	2.85		-15	27.03	2.77
-12	72	26.63	2.85		-14	27.7	2.77
-11	73	27.3	2.85		-13	28.27	2.77
-10	74	27.33	2.85		-12	26.7	2.77
-9	75	27.47	2.85		-11	24.03	2.77
-8	76	26.33	2.85		-10	23.33	2.77
-7	77	24.33	2.85		-9	23.27	2.77
-6	78	22.5	2.85		-8	25.37	2.77
-5	79	23.47	2.85		-7	25.03	2.77
-4	80	26.43	2.85		-6	26.73	2.77
-3	81	28.5	2.85		-5	27.43	2.77
-2	82	29.3	2.85		-4	29.2	2.77
-1	83	28.4	2.85		-3	29.43	2.77
0	84	29.47	2.85		-2	29.07	2.77
1	85	29.7	2.85		-1	29.13	2.77
2	86	29.7	2.85		0	29.07	2.77
3	87	28.43	2.85		1	28.1	2.77
4	88	27.87	2.85		2	27.23	2.77
5	89	28.27	2.85		3	27.07	2.77
6	90	28.6	2.85		4	27.93	2.77
7	91	28.43	2.85		5	28	2.77
8	92	27.63	2.85		6	27.97	2.77
9	93	27.23	2.85		7	28.93	2.77
10	94	27.8	2.85		8	30.87	2.77
11	95	30.07	2.85		9	33.27	2.77
12	96	31.13	2.85		10	33.1	2.77
13	97	31.17	2.85		11	31.33	2.77
14	98	30.47	2.85		12	29.87	2.77
15	99	29.7	2.85		13	29.07	2.77
16	100	30.07	2.85		14	30.4	2.77
17	101	30.17	2.85		15	30.4	2.77
18	102	31.4	2.85		16	30.7	2.77
19	103	30.73	2.85		17	29.57	2.77
20	104	29.47	2.85		18	29.17	2.77
21	105	28.07	2.85		19	28.53	2.77
22	106	28.5	2.85		20	27.73	2.77
23	107	28.37	2.85		21	26.87	2.77
24	108	27.4	2.85		22	26.93	2.77
25	109	26.27	2.85		23	27.4	2.77
26	110	25.87	2.85		24	26.8	2.77
27	111	26.23	2.85		25	26.67	2.77
28	112	25.53	2.85		26	26.03	2.77
29	113	25.73	2.85		27	25.9	2.77
30	114	25.17	2.85		28	25.63	2.77
31	115	24.83	2.85		29	24.8	2.77
32	116	25.53	2.85		30	25.57	2.77
33	117	26.5	2.85		31	26.33	2.77
34	118	27.3	2.85		32	28.4	2.77
35	119	26.5	2.85		33	28.13	2.77
36	120	26.37	2.85		34	26.97	2.77
37	121	27.3	2.85		35	25.8	2.77
38	122	27.4	2.85		36	25.4	2.77
39	123	27.2	2.85		37	25.3	2.77
40	124	25.6	2.85		38	24.7	2.77
41	125	23.97	2.85		39	24.4	2.77
42	126	23.77	2.85		40	24	2.77
43	127	24.47	2.85		41	24.37	2.77
44	128	25.9	2.85		42	25.67	2.77
45	129	26.57	2.85		43	27.57	2.77
46	130	27.33	2.85		44	27.83	2.77
47	131	28.8	2.85		45	27.2	2.77
48	132	27.43	2.85		46	28.33	2.77
49	133	26.83	2.85		47	28.6	2.77
50	134	28.03	2.85		48	28.7	2.77
51	135	28.57	2.85		49	27.83	2.77
52	136	29.7	2.85		50	28	2.77
53	137	29.2	2.85		51	29.33	2.77
54	138	29.47	2.85		52	30.47	2.77
55	139	29.53	2.85		53	29.9	2.77
56	140	29.37	2.85		54	29.3	2.77
57	141	29.23	2.85		55	28.33	2.77
58	142	28.6	2.85		56	28.17	2.77
59	143	27.47	2.85		57	27.13	2.77
60	144	26.37	2.85		58	26.13	2.77
61	145	26.5	2.85		59	25.67	2.77
62	146	27.27	2.85		60	26.23	2.77
63	147	29.33	2.85		61	27.87	2.77
64	148	29.03	2.85		62	29.57	2.77
65	149	29.1	2.85		63	30.07	2.77
66	150	27.5	2.85		64	29.87	2.77
67	151	26.5	2.85		65	29	2.77
68	152	26.87	2.85		66	28.43	2.77
69	153	27.83	2.85		67	27.77	2.77
70	154	29.37	2.85		68	27.5	2.77
71	155	28.07	2.85		69	26.8	2.77
72	156	26.9	2.85		70	25.93	2.77
73	157	25.27	2.85		71	26.23	2.77
74	158	25.73	2.85		72	27.2	2.77
75	159	27.37	2.85		73	28.5	2.77
76	160	28.27	2.85		74	28.63	2.77
77	161	28	2.85		75	28.37	2.77
78	162	27.33	2.85		76	27	2.77
79	163	26.77	2.85		77	26.03	2.77
80	164	26.1	2.85		78	25.07	2.77
81	165	25.13	2.85		79	25.3	2.77
82	166	25.97	2.85		80	25.57	2.77
83	167	27.1	2.85		81	26.93	2.77
84	168	27.27	2.85		82	27.47	2.77
85	169	27.8	2.85		83	27.8	2.77
86	170	27.67	2.85		84	28.07	2.77
87	171	28.97	2.85		85	29.07	2.77
88	172	29.43	2.85		86	30.03	2.77
89	173	31.3	2.85		87	30.57	2.77
90	174	32.07	2.85		88	24.92	3.39
91	175	31.7	2.85		89	25.62	3.39
92	176	31.13	2.85		90	31.97	2.77
93	177	31.73	2.85		91	32.8	2.77
94	178	32	2.85		92	32.83	2.77
95	179	32.17	2.85		93	32.2	2.77
96	180	31.3	2.85		94	32.5	2.77
97	181	32.07	2.85		95	32.13	2.77
98	182	32.13	2.85		96	33.27	2.77
99	183	32.23	2.85		97	33.27	2.77
100	184	33.9	2.85		98	34.2	2.77
101	185	35.3	2.85		99	35.57	2.77
102	186	36.87	2.85		100	38.17	2.77
103	187	37.8	2.85		101	39.27	2.77
104	188	39	2.85		102	40.7	2.77
105	189	38.87	2.85		103	40.4	2.77
106	190	39.73	2.85		104	41.03	2.77
107	191	41.77	2.85		105	41.53	2.77
108	192	44.1	2.85		106	42.5	2.77
109	193	45.43	2.85		107	42.53	2.77
110	194	45.2	2.85		108	42.33	2.77
111	195	42	2.85		109	41.17	2.77
112	196	40.47	2.85		110	40.53	2.77
113	197	36.9	2.85		111	36.63	2.77
114	198	37.03	2.85		112	34.17	2.77
115	199	33.5	2.85		113	32.5	2.77
116	200	32.13	2.85		114	32.77	2.77
117	201	32.1	2.85		115	33.2	2.77
118	202	33.37	2.85		116	32.8	2.77
119	203	34.77	2.85		117	33.67	2.77
120	204	33.77	2.85		118	34.87	2.77
121	205	33	2.85		119	35.77	2.77
122	206	31.73	2.85		120	40.81	3.39
123	207	33.03	2.85		121	40.61	3.39
124	208	35	2.85		122	39.61	3.39
125	209	38.07	2.85		123	34.97	2.77
126	210	37.87	2.85		124	37.43	2.77
127	211	36.63	2.85		125	36.87	2.77
128	212	36.93	2.85		126	37.27	2.77
129	213	36.27	2.85		127	38.1	2.77
130	214	36.77	2.85		128	38.4	2.77
131	215	35.57	2.85		129	37.37	2.77
132	216	36.47	2.85		130	35.07	2.77
133	217	34.7	2.85		131	34.23	2.77
134	218	34.17	2.85		132	34.87	2.77
135	219	33.63	2.85		133	35.4	2.77
136	220	35.33	2.85		134	35.2	2.77
137	221	35.6	2.85		135	34.53	2.77
138	222	35.5	2.85		136	34.07	2.77
139	223	35.63	2.85		137	34.3	2.77
140	224	35	2.85		138	34.63	2.77
141	225	34.83	2.85		139	35.43	2.77
142	226	34.83	2.85		140	35.57	2.77
143	227	37.27	2.85		141	35.7	2.77
144	228	37.33	2.85		142	34.7	2.77
145	229	35.8	2.85		143	33.7	2.77
146	230	33.23	2.85		144	32.77	2.77
147	231	32.57	2.85		145	32.7	2.77
148	232	31.07	2.85		146	31.87	2.77
149	233	31.13	2.85		147	31.3	2.77
150	234	31.17	2.85		148	31.87	2.77
151	235	32.2	2.85		149	32.27	2.77
152	236	33.27	2.85		150	32.2	2.77
153	237	33.5	2.85		151	32.8	2.77
154	238	32.97	2.85		152	33.1	2.77
155	239	32.43	2.85		153	32.43	2.77
156	240	30.53	2.85		154	29.87	2.77
157	241	30.03	2.85		155	28.63	2.77
158	242	26.3	2.85		156	27.23	2.77
159	243	26.13	2.85		157	27.27	2.77
160	244	26.6	2.85		158	26.33	2.77
161	245	28.07	2.85		159	26.63	2.77
162	246	27.73	2.85		160	25.37	2.77
163	247	25.93	2.85		161	25.97	2.77
164	248	25.7	2.85		162	27.63	2.77
165	249	27.07	2.85		163	27.87	2.77
166	250	29.23	2.85		164	27.93	2.77
167	251	28.93	2.85		165	27.1	2.77
168	252	27.33	2.85		166	27.63	2.77
169	253	26.33	2.85		167	27.23	2.77
170	254	25.77	2.85		168	26.17	2.77
171	255	25.27	2.85		169	24.33	2.77
172	256	24.27	2.85		170	22.9	2.77
173	257	23.57	2.85		171	24.1	2.77
174	258	23.5	2.85		172	25.17	2.77
175	259	24.3	2.85		173	26.13	2.77
176	260	25.47	2.85		174	25.43	2.77
177	261	25.77	2.85		175	24.93	2.77
178	262	25.7	2.85		176	24.77	2.77
179	263	24.63	2.85		177	24.83	2.77
180	264	24.7	2.85		178	24.9	2.77
181	265	24.77	2.85		179	24.63	2.77
182	266	23.4	2.85		180	25.1	2.77
183	267	23.6	2.85		181	24.73	2.77
184	268	24.97	2.85		182	26.83	2.77
185	269	27.23	2.85		183	25.57	2.77
186	270	29.23	2.85		184	27.03	2.77
187	271	26.5	2.85		185	25.67	2.77
188	272	25.9	2.85		186	26	2.77
189	273	25.1	2.85		187	25.63	2.77
190	274	25.13	2.85		188	25.13	2.77
191	275	24.3	2.85		189	23.23	2.77
192	276	22.87	2.85		190	21.5	2.77
193	277	22.63	2.85		191	22.83	2.77
194	278	22.57	2.85		192	23.6	2.77
195	279	23.03	2.85		193	24.8	2.77
196	280	21.8	2.85		194	22.87	2.77
197	281	21.67	2.85		195	21.9	2.77
198	282	20.1	2.85		196	20.67	2.77
199	283	20.97	2.85		197	19.13	2.77
200	284	21.27	2.85		198	20.13	2.77
201	285	20.1	2.85		199	19.77	2.77
202	286	20.37	2.85		200	20.73	2.77
203	287	20.67	2.85		201	20.3	2.77
204	288	21.7	2.85		202	20.7	2.77
205	289	22.33	2.85		203	22.43	2.77
206	290	22.67	2.85		204	23.9	2.77
207	291	24.73	2.85		205	26.4	2.77
208	292	24.57	2.85		206	24.23	2.77
209	293	25.6	2.85		207	22.83	2.77
210	294	24.43	2.85		208	22.67	2.77
211	295	23.73	2.85		209	23.93	2.77
212	296	23.77	2.85		210	24.63	2.77
213	297	22.97	2.85		211	22.73	2.77
214	298	23.57	2.85		212	21.77	2.77
215	299	22.37	2.85		213	21.4	2.77
216	300	22.3	2.85		214	25.4	2.77
217	301	22.33	2.85		215	25.07	2.77
218	302	25.39	3.49		216	28.8	2.77
219	303	25.39	3.49		217	29.66	3.39
220	304	28.34	3.49		218	28.26	3.39
221	305	28.34	3.49		219	28.26	3.39
222	306	28.39	3.49		220	28.16	3.39
223	307	25.99	3.49		221	25.76	3.39
224	308	25.69	3.49		222	19.06	4.8
225	309	27.14	3.49		223	21.96	4.8
226	310	21.79	4.94		224	21.96	4.8
227	311	22.79	4.94		225	22.96	4.8
