# Supplementary material for: An agroecological approach to preparation and use of a milk protein production baseline
Source: PeerJ. 2024 Sep 23;12:e18103. doi: 10.7717/peerj.18103 (PMC11426323; doi:10.7717/peerj.18103)
Supplement: Supplemental Information 2 — Data from a farm neighbouring Tatua farm, used for baseline comparison. [file peerj-12-18103-s002.xlsx]

## Sheet: Volume
Date	Nikau 78305 2021/22 Litres	ratio	Days from Peak	Nikau 78305 2020/21 Litres	ratio	Days from Peak	Nikau 78305 2019/20 Litres	ratio	Days from Peak	Nikau 78305 2018/19 Litres	ratio	Days from Peak		Means
2018-07-24				474.5	0.0254601	-80	1792.5	0.108426	-63					Term	Fitted Mean	SE Mean
2018-07-25	886	0.0525224	-70	474.5	0.0254601	-79	1792.5	0.108426	-62					Year
2018-07-26	886	0.0525224	-69	781	0.0419059	-78	2077.5	0.125665	-61					2018	11489.9	65.8
2018-07-27	1667	0.0988203	-68	781	0.0419059	-77	2077.5	0.125665	-60	613	0.0344963	-77		2019	10592.5	65.2
2018-07-28	1667	0.0988203	-67	1601	0.0859044	-76	2628	0.158964	-59	613	0.0344963	-76		2020	11830.4	65.9
2018-07-29	2768.5	0.164118	-66	1601	0.0859044	-75	2628	0.158964	-58	995	0.0559932	-75		Days from Peak
2018-07-30	2768.5	0.164118	-65	2674	0.143478	-74	3086	0.186668	-57	995	0.0559932	-74		-80	-52	1107	0.0603874
2018-07-31	2826	0.167526	-64	2674	0.143478	-73	3086	0.186668	-56	1384	0.0778841	-73		-79	-52	1107
2018-08-01	4564.5	0.270585	-63	3671	0.196974	-72	3764.5	0.22771	-55	1384	0.0778841	-72		-78	255	1107
2018-08-02	4564.5	0.270585	-62	3671	0.196974	-71	3764.5	0.22771	-54	1704.5	0.0959201	-71		-77	341	782
2018-08-03	5142	0.304819	-61	4610.5	0.247384	-70	6120	0.370191	-53	1704.5	0.0959201	-70		-76	751	782
2018-08-04	5605	0.332266	-60	4610.5	0.247384	-69	4031	0.24383	-52	1972.5	0.111002	-69		-75	942	782
2018-08-05	5605	0.332266	-59	5360.5	0.287627	-68	4031	0.24383	-51	1972.5	0.111002	-68		-74	1479	782
2018-08-06	6527.5	0.386952	-58	5360.5	0.287627	-67	5523	0.334079	-50	2517	0.141643	-67		-73	1673	782
2018-08-07	6527.5	0.386952	-57	6451.5	0.346166	-66	6048.5	0.365866	-49	2517	0.141643	-66		-72	2172	782
2018-08-08	7021	0.416207	-56	6451.5	0.346166	-65	6048.5	0.365866	-48	3319.5	0.186804	-65		-71	2332	782
2018-08-09	7021	0.416207	-55	7388	0.396416	-64	6990.5	0.422847	-47	3319.5	0.186804	-64		-70	2802	782
2018-08-10	7876.5	0.466922	-54	7388	0.396416	-63	6990.5	0.422847	-46	3902.5	0.219612	-63		-69	2936	782
2018-08-11	7876.5	0.466922	-53	8321.5	0.446504	-62	7403.5	0.447828	-45	3902.5	0.219612	-62		-68	3311	782
2018-08-12	8664	0.513605	-52	8321.5	0.446504	-61	7403.5	0.447828	-44	4830	0.271806	-61		-67	3583	782
2018-08-13	8664	0.513605	-51	9039	0.485003	-60	8290.5	0.501482	-43	4830	0.271806	-60		-66	4128	782
2018-08-14	8850	0.524631	-50	9039	0.485003	-59	8290.5	0.501482	-42	5643.5	0.317586	-59		-65	4530	782
2018-08-15	9247	0.548165	-49	9282	0.498042	-58	9198.5	0.556406	-41	5643.5	0.317586	-58		-64	4998	782
2018-08-16	9777	0.579584	-48	9598	0.514997	-57	9198.5	0.556406	-40	6274.5	0.353095	-57		-63	4361	638
2018-08-17	9929	0.588594	-47	10200	0.547298	-56	9520	0.575853	-39	6274.5	0.353095	-56		-62	4672	638
2018-08-18	10053	0.595945	-46	9865	0.529323	-55	9274	0.560973	-38	7071.5	0.397946	-55		-61	5076	638
2018-08-19	10205	0.604956	-45	10639	0.570854	-54	9825	0.594302	-37	7071.5	0.397946	-54		-60	5315	638
2018-08-20	10323	0.611951	-44	10549	0.566025	-53	10090	0.610331	-36	7721	0.434496	-53		-59	5770	638
2018-08-21	10781	0.639101	-43	10748	0.576702	-52	10703	0.647411	-35	8044	0.452673	-52		-58	5851	638
2018-08-22	10792	0.639753	-42	10414	0.558781	-51	11208	0.677958	-34	8490	0.477772	-51		-57	6319	638
2018-08-23	10921	0.647401	-41	11077	0.594355	-50	11075	0.669913	-33	8886	0.500056	-50		-56	6520	638
2018-08-24	10808	0.640702	-40	11492	0.616623	-49	11493	0.695197	-32	9044	0.508948	-49		-55	6900	638
2018-08-25	11087	0.657241	-39	11138	0.597628	-48	12036	0.728043	-31	9126	0.513562	-48		-54	7158	638
2018-08-26	11354	0.673069	-38	11558	0.620164	-47	11266	0.681466	-30	9063	0.510017	-47		-53	8130	638
2018-08-27	11420	0.676981	-37	11244	0.603316	-46	12187	0.737176	-29	9675	0.544457	-46		-52	7608	638
2018-08-28	11365	0.673721	-36	11788	0.632505	-45	12484	0.755142	-28	9896	0.556894	-45		-51	7645	638
2018-08-29	11735	0.695655	-35	12075	0.647905	-44	12368	0.748125	-27	10135	0.570343	-44		-50	8495	638
2018-08-30	11699	0.693521	-34	12004	0.644095	-43	12463	0.753871	-26	9937	0.559201	-43		-49	8861	638
2018-08-31	12180	0.722035	-33	12337	0.661963	-42	12901	0.780365	-25	10562	0.594373	-42		-48	8771	638
2018-09-01	12448	0.737922	-32	12394	0.665021	-41	12481	0.75496	-24	10661	0.599944	-41		-47	9204	638
2018-09-02	12481	0.739878	-31	13009	0.69802	-40	12685	0.7673	-23	11272	0.634328	-40		-46	9303	638
2018-09-03	12212	0.723931	-30	12872	0.690669	-39	12884	0.779337	-22	11187	0.629544	-39		-45	9696	638
2018-09-04	12544	0.743613	-29	12895	0.691903	-38	12833	0.776252	-21	11379	0.640349	-38		-44	9871	638
2018-09-05	12730	0.754639	-28	13901	0.745882	-37	13089	0.791737	-20	10831	0.60951	-37		-43	10077	638
2018-09-06	12703	0.753038	-27	13433	0.720771	-36	13283	0.803472	-19	11583	0.651829	-36		-42	10396	638
2018-09-07	13001	0.770704	-26	14069	0.754896	-35	13112	0.793128	-18	11374	0.640068	-35		-41	10751	638
2018-09-08	13301	0.788488	-25	14062	0.754521	-34	13070	0.790588	-17	12141	0.68323	-34		-40	11160	638
2018-09-09	13250	0.785464	-24	14336	0.769223	-33	13650	0.825671	-16	12091	0.680416	-33		-39	11193	638
2018-09-10	13276	0.787006	-23	14592	0.782959	-32	14015	0.84775	-15	12877	0.724648	-32		-38	11183	638
2018-09-11	13509	0.800818	-22	14901	0.799539	-31	13671	0.826942	-14	12126	0.682386	-31		-37	11519	638
2018-09-12	12710	0.753453	-21	14375	0.771315	-30	13757	0.832144	-13	12904	0.726168	-30		-36	11702	638
2018-09-13	13432	0.796253	-20	14314	0.768042	-29	13788	0.834019	-12	12614	0.709848	-29		-35	12049	638
2018-09-14	13448	0.797202	-19	15030	0.80646	-28	14740	0.891604	-11	13256	0.745976	-28		-34	12470	638
2018-09-15	13997	0.829747	-18	14820	0.795192	-27	14742	0.891725	-10	12996	0.731345	-27		-33	12501	638
2018-09-16	14889	0.882625	-17	15371	0.824757	-26	14546	0.879869	-9	13523	0.761002	-26		-32	12987	638
2018-09-17	13048	0.77349	-16	15284	0.820089	-25	14275	0.863477	-8	13567	0.763478	-25		-31	13021	638
2018-09-18	14245	0.844448	-15	15688	0.841766	-24	14845	0.897955	-7	13830	0.778278	-24		-30	12848	638
2018-09-19	14200	0.841781	-14	15362	0.824274	-23	14637	0.885374	-6	15008	0.844569	-23		-29	13038	638
2018-09-20	14526	0.861106	-13	15377	0.825079	-22	15208	0.919913	-5	11292	0.635453	-22		-28	13590	638
2018-09-21	14390	0.853044	-12	15918	0.854107	-21	14831	0.897109	-4	15213	0.856106	-21		-27	13395	638
2018-09-22	15300	0.906989	-11	16197	0.869078	-20	15507	0.937999	-3	14842.5	0.835256	-20		-26	13786	638
2018-09-23	14815	0.878238	-10	15602	0.837152	-19	15539	0.939935	-2	14472	0.814406	-19		-25	13917	638
2018-09-24	15052	0.892288	-9	15935	0.85502	-18	16017	0.968848	-1	15583	0.876927	-18		-24	14000	638
2018-09-25	15289	0.906337	-8	16031	0.860171	-17	16532	1	0	15676	0.882161	-17		-23	14352	638
2018-09-26	14824	0.878772	-7	15803	0.847937	-16	15478	0.936245	1	15152	0.852673	-16		-22	14223	782
2018-09-27	15029	0.890924	-6	15258	0.818694	-15	15559	0.941144	2	16689	0.939167	-15		-21	14655	638
2018-09-28	15249	0.903966	-5	15524	0.832967	-14	15818	0.956811	3	16247	0.914294	-14		-20	14710	638
2018-09-29	15666	0.928686	-4	16081	0.862853	-13	15118	0.914469	4	16108	0.906472	-13		-19	14452	638
2018-09-30	15730.5	0.932509	-3	15665	0.840532	-12	15389	0.930861	5	16388.5	0.922257	-12		-18	14877	638
2018-10-01	15795	0.936333	-2	15908	0.853571	-11	15429	0.933281	6	16388.5	0.922257	-11		-17	14926	638
2018-10-02	15986	0.947655	-1	16010	0.859044	-10	15714	0.95052	7	16802	0.945526	-10		-16	14868	638
2018-10-03	16869	1	0	16201	0.869292	-9	15924	0.963223	8	16516	0.929432	-9		-15	15321	638
2018-10-04	14567	0.863537	1	16969	0.910501	-8	15740	0.952093	9	17204	0.968149	-8		-14	15147	638
2018-10-05	15273	0.905389	2	17015	0.912969	-7	15526	0.939148	10	16365	0.920934	-7		-13	15315	638
2018-10-06	15813	0.9374	3	17335	0.930139	-6	16098	0.973748	11	16914	0.951829	-6		-12	15281	638
2018-10-07	15366	0.910902	4	17536	0.940924	-5	15979	0.96655	12	17158	0.96556	-5		-11	15679	638
2018-10-08	15552	0.921928	5	17492	0.938563	-4	14799	0.895173	13	17770	1	-4		-10	15851	638
2018-10-09	14386	0.852807	6	17751	0.95246	-3	15803	0.955904	14	16610	0.934721	-3		-9	15754	638
2018-10-10	15330	0.908768	7	17824	0.956377	-2	16215	0.980825	15	17323	0.974845	-2		-8	16149	638
2018-10-11	15453	0.916059	8	18333	0.983688	-1	16446	0.994798	16	17598	0.990321	-1		-7	16075	638
2018-10-12	15144	0.897741	9	18637	1	0	16068	0.971933	17	17727	0.99758	0		-6	16295	638
2018-10-13	16088	0.953702	10	16348	0.87718	1	15047	0.910174	18	17346	0.97614	1		-5	16634	638
2018-10-14	16470	0.976347	11	17439	0.935719	2	14667	0.887188	19	16535	0.930501	2		-4	16698	638
2018-10-15	15185	0.900172	12	16870	0.905189	3	15575	0.942112	20	16972	0.955093	3		-3	16623	638
2018-10-16	16094	0.954058	13	16777	0.900199	4	15363	0.929289	21	16937	0.953123	4		-2	16895	638
2018-10-17	16129	0.956133	14	16842	0.903686	5	15352	0.928623	22	17064	0.96027	5		-1	17316	638
2018-10-18	16044	0.951094	15	16920	0.907871	6	15948	0.964675	23	17432	0.980979	6		0	17632	638
2018-10-19	15888	0.941846	16	17097	0.917369	7	15760	0.953303	24	17257	0.971131	7		1	16391	638
2018-10-20	15305	0.907286	17	17149	0.920159	8	15100	0.91338	25	16617	0.935115	8		2	16511	638
2018-10-21	15836	0.938763	18	16407	0.880346	9	14753	0.892391	26	16970	0.95498	9		3	16553	638
2018-10-22	15484	0.917897	19	16524	0.886623	10	15212	0.920155	27	16854	0.948452	10		4	16277	638
2018-10-23	15868	0.94066	20	16662	0.894028	11	15246	0.922211	28	16447	0.925549	11		5	16432	638
2018-10-24	16409	0.972731	21	17271	0.926705	12	14811	0.895899	29	16001	0.90045	12		6	16594	638
2018-10-25	16270	0.964491	22	16583	0.889789	13	15389	0.930861	30	15962	0.898255	13		7	16689	638
2018-10-26	15740	0.933072	23	16773	0.899984	14	15233	0.921425	31	16938	0.95318	14		8	16563	638
2018-10-27	15952	0.94564	24	16107	0.864249	15	15616	0.944592	32	16804	0.945639	15		9	16372	638
2018-10-28	16277	0.964906	25	16409	0.880453	16	15355	0.928805	33	16982	0.955656	16		10	16301	638
2018-10-29	15496	0.918608	26	15769	0.846113	17	15819	0.956872	34	16935	0.953011	17		11	16402	638
2018-10-30	14872	0.881617	27	16435	0.881848	18	15665	0.947556	35	16878	0.949803	18		12	16417	638
2018-10-31	14248	0.844626	28	16079	0.862746	19	15493	0.937152	36	16767	0.943557	19		13	15781	638
2018-11-01	15943	0.945106	29	16591	0.890218	20	15733	0.951669	37	16614	0.934947	20		14	16505	638
2018-11-02	15126	0.896674	30	15971	0.856951	21	15747	0.952516	38	16261	0.915082	21		15	16375	638
2018-11-03	16080	0.953228	31	16388	0.879326	22	14415	0.871945	39	16480	0.927406	22		16	16612	638
2018-11-04	15411	0.913569	32	15215	0.816387	23	14760	0.892814	40	15978	0.899156	23		17	16257	638
2018-11-05	15991	0.947952	33	15945	0.855556	24	14979	0.906061	41	16329	0.918908	24		18	16120	638
2018-11-06	15568	0.922876	34	16087	0.863175	25	15564	0.941447	42	16568	0.932358	25		19	15838	638
2018-11-07	15980	0.9473	35	16477	0.884102	26	14879	0.900012	43	16374	0.921441	26		20	16260	638
2018-11-08	15111	0.895785	36	15913	0.853839	27	15293	0.925054	44	17167	0.966066	27		21	15865	638
2018-11-09	15224	0.902484	37	16509	0.885819	28	15272	0.923784	45	16711	0.940405	28		22	16073	638
2018-11-10	15560	0.922402	38	14745	0.791168	29	15255	0.922756	46	16794	0.945076	29		23	15714	638
2018-11-11	14040	0.832296	39	15689	0.84182	30	15239	0.921788	47	16178	0.910411	30		24	16011	638
2018-11-12	14933	0.885233	40	15121	0.811343	31	14765	0.893116	48	16612	0.934834	31		25	15918	638
2018-11-13	15657	0.928152	41	15052	0.807641	32	14856	0.898621	49	16465	0.926562	32		26	15868	638
2018-11-14	15359	0.910487	42	15349	0.823577	33	14961	0.904972	50	15673	0.881992	33		27	16097	638
2018-11-15	15359	0.910487	43	14502	0.77813	34	14986	0.906484	51	15857	0.892347	34		28	16155	638
2018-11-16	15025	0.890687	44	14123	0.757794	35	15027	0.908964	52	16081	0.904952	35		29	15450	638
2018-11-17	14337	0.849902	45	14651	0.786124	36	14713	0.889971	53	15462	0.870118	36		30	15752	638
2018-11-18	14704	0.871658	46	14701	0.788807	37	14441	0.873518	54	16709	0.940293	37		31	15655	638
2018-11-19	15096	0.894896	47	14977	0.803616	38	14734	0.891241	55	16520	0.929657	38		32	15711	638
2018-11-20	15348	0.909835	48	15231	0.817245	39	13676	0.827244	56	16877	0.949747	39		33	15459	638
2018-11-21	14820	0.878535	49	15163	0.813597	40	13881	0.839644	57	15971	0.898762	40		34	15393	638
2018-11-22	15107	0.895548	50	15285	0.820143	41	14074	0.851319	58	15268	0.859201	41		35	15290	638
2018-11-23	15240	0.903432	51	15279	0.819821	42	14138	0.85519	59	15970	0.898706	42		36	15202	638
2018-11-24				15445	0.828728	43	14469	0.875212	60	15916	0.895667	43		37	15714	638
2018-11-25				18361	0.985191	44	14243	0.861541	61	15812	0.889814	44		38	15748	638
2018-11-26				11819	0.634169	45	13221	0.799722	62	15670	0.881823	45		39	15508	638
2018-11-27				15408	0.826743	46	13589	0.821982	63	15257	0.858582	46		40	15298	638
2018-11-28				14980	0.803777	47	13721	0.829966	64	15513	0.872988	47		41	15177	638
2018-11-29				15753	0.845254	48	13202	0.798572	65	15332	0.862802	48		42	15604	638
2018-11-30				15078	0.809036	49	13292	0.804016	66	15235	0.857344	49		43	15413	638
2018-12-01				14985	0.804046	50	13438	0.812848	67	14786	0.832077	50		44	16489	638
2018-12-02				14499	0.777969	51	13391	0.810005	68	14902	0.838604	51		45	15734	782
2018-12-03				14482	0.777056	52	13035	0.788471	69	14688	0.826562	52		46	15307	638
2018-12-04				14418	0.773622	53	13263	0.802262	70	14348	0.807428	53		47	15244	638
2018-12-05				13963	0.749209	54	12735	0.770324	71	14534	0.817895	54		48	15283	638
2018-12-06				13574	0.728336	55	12794	0.773893	72	14111	0.794091	55		49	15056	638
2018-12-07				15550	0.834362	56	12483	0.755081	73	14587	0.820878	56		50	14911	638
2018-12-08				15250	0.818265	57	13440	0.812969	74	14301	0.804783	57		51	14796	638
2018-12-09				14762	0.79208	58	13501	0.816659	75	8991	0.505965	58		52	14732	638
2018-12-10				15402	0.826421	59	12907	0.780728	76	14498	0.815869	59		53	14493	638
2018-12-11				14412	0.7733	60	12757	0.771655	77	14812	0.83354	60		54	14313	638
2018-12-12				14327	0.76874	61	13046	0.789136	78	14427	0.811874	61		55	14140	638
2018-12-13				14233	0.763696	62	12939	0.782664	79	14579	0.820428	62		56	14604	638
2018-12-14				14985	0.804046	63	13032	0.788289	80	14092	0.793022	63		57	14477	638
2018-12-15				14295	0.767023	64	13331	0.806376	81	14133	0.795329	64		58	14511	782
2018-12-16				14381	0.771637	65	13297	0.804319	82	14124	0.794823	65		59	14679	638
2018-12-17				14571	0.781832	66	13137	0.794641	83	13975	0.786438	66		60	14564	638
2018-12-18				15244	0.817943	67	13075	0.79089	84	13729	0.772594	67		61	14332	638
2018-12-19				15166	0.813758	68	13055	0.789681	85	13674	0.769499	68		62	14011	638
2018-12-20				14575	0.782046	69	13270	0.802686	86	13969	0.7861	69		63	14222	638
2018-12-21				14682	0.787788	70	12940	0.782724	87	14433	0.812212	70		64	14050	638
2018-12-22				14148	0.759135	71	12273	0.742378	88	14684	0.826337	71		65	13902	638
2018-12-23				14382	0.771691	72	12837	0.776494	89	14882	0.837479	72		66	13946	638
2018-12-24				14776	0.792831	73	12480	0.7549	90	14831	0.834609	73		67	14137	638
2018-12-25				14428	0.774159	74	13411	0.811215	91	15129	0.851379	74		68	14077	638
2018-12-26				14468	0.776305	75	12858	0.777764	92	14441	0.812662	75		69	13860	638
2018-12-27				14211	0.762515	76	12688	0.767481	93	14368	0.808554	76		70	14126	638
2018-12-28				13944	0.748189	77	12472	0.754416	94	14637	0.823692	77		71	13856	638
2018-12-29				14191	0.761442	78	12984	0.785386	95	14710	0.8278	78		72	14019	638
2018-12-30				13404	0.719214	79	12533	0.758105	96	13587	0.764603	79		73	14030	638
2018-12-31				13153	0.705747	80	13068	0.790467	97	14112	0.794147	80		74	14332	638
2019-01-01				13981	0.750174	81	12746	0.77099	98	14648	0.824311	81		75	14137	638
2019-01-02				13891	0.745345	82	12482	0.755021	99	14442	0.812718	82		76	13829	638
2019-01-03				14063	0.754574	83	12845	0.776978	100	14074	0.792009	83		77	13779	638
2019-01-04				15333	0.822718	84	12884	0.779337	101	13848	0.779291	84		78	13982	638
2019-01-05				12911	0.692762	85	13121	0.793673	102	14025	0.789252	85		79	13310	638
2019-01-06				14074	0.755164	86	13506	0.816961	103	13934	0.784131	86		80	13432	638
2019-01-07				13545	0.72678	87	12855	0.777583	104	13406	0.754418	87		81	13987	638
2019-01-08				13727	0.736546	88	12963	0.784116	105	12629	0.710692	88		82	13877	638
2019-01-09				13995	0.750926	89	12876	0.778853	106	13225	0.744232	89		83	13758	638
2019-01-10				13976	0.749906	90	12655	0.765485	107	12554	0.706472	90		84	14085	638
2019-01-11				14529	0.779578	91	13549	0.819562	108	12981	0.730501	91		85	13330	638
2019-01-12				14068	0.754843	92	12868	0.778369	109	13618	0.766348	92		86	13759	638
2019-01-13				14388	0.772013	93	12999	0.786293	110	12894	0.725605	93		87	13297	638
2019-01-14				14038	0.753233	94	13020	0.787564	111	13171	0.741193	94		88	12876	638
2019-01-15				13649	0.73236	95	12393	0.749637	112	12586	0.708272	95		89	13352	638
2019-01-16				13417	0.719912	96	12488	0.755383	113	13043	0.73399	96		90	13003	638
2019-01-17				13605	0.729999	97	12891	0.77976	114	12557	0.70664	97		91	13640	638
2019-01-18				13228	0.709771	98	12707	0.768631	115	13381	0.753011	98		92	13515	638
2019-01-19				13888	0.745184	99	12738	0.770506	116	12443	0.700225	99		93	13323	638
2019-01-20				13950	0.748511	100	12946	0.783087	117	12257	0.689758	100		94	13227	638
2019-01-21				13111	0.703493	101	12625	0.76367	118	11449	0.644288	101		95	13073	638
2019-01-22				13596	0.729517	102	12338	0.74631	119	12200	0.68655	102		96	12998	638
2019-01-23				13738	0.737136	103	11501	0.695681	120	12119	0.681992	103		97	13077	638
2019-01-24				13601	0.729785	104	11599	0.701609	121	11659	0.656106	104		98	13118	638
2019-01-25				13653	0.732575	105	11615	0.702577	122	11900	0.669668	105		99	12938	638
2019-01-26				13676	0.733809	106	11437	0.69181	123	11777	0.662746	106		100	13017	638
2019-01-27				13431	0.720663	107	11541	0.698101	124	11567	0.650929	107		101	12481	638
2019-01-28				13495	0.724097	108	11204	0.677716	125	12421	0.698987	108		102	12972	638
2019-01-29				13085	0.702098	109	11388	0.688846	126	12556	0.706584	109		103	13121	638
2019-01-30				12844	0.689167	110	11266	0.681466	127	11870	0.66798	110		104	12705	638
2019-01-31				13050	0.70022	111	11593	0.701246	128	12650	0.711874	111		105	12839	638
2019-02-01				13134	0.704727	112	10883	0.658299	129	12041	0.677603	112		106	12776	638
2019-02-02				12821	0.687933	113	11194	0.677111	130	12246	0.689139	113		107	12551	638
2019-02-03				12796	0.686591	114	10944	0.661989	131	12488	0.702757	114		108	13155	638
2019-02-04				12311	0.660568	115	10738	0.649528	132	12537	0.705515	115		109	12836	638
2019-02-05				12068	0.647529	116	9217	0.557525	133	12069	0.679178	116		110	12571	638
2019-02-06				12006	0.644202	117	10891	0.658783	134	12872	0.724367	117		111	12907	638
2019-02-07				12115	0.650051	118	10697	0.647048	135	12097	0.680754	118		112	12523	638
2019-02-08				12043	0.646188	119	9950	0.601863	136	12539	0.705627	119		113	12518	638
2019-02-09				12586	0.675323	120	10324	0.624486	137	12555	0.706528	120		114	12725	638
2019-02-10				11923	0.639749	121	9354	0.565812	138	12127	0.682442	121		115	12518	638
2019-02-11				11730	0.629393	122	9849	0.595754	139	12461	0.701238	122		116	12292	638
2019-02-12				11053	0.593068	123	9623	0.582083	140	12045	0.677828	123		117	12608	638
2019-02-13				11037	0.592209	124	9473	0.57301	141	11918	0.670681	124		118	12279	638
2019-02-14				11174	0.59956	125	9111	0.551113	142	11990	0.674733	125		119	12307	638
2019-02-15				11132	0.597306	126	8930	0.540165	143	11919	0.670737	126		120	12214	638
2019-02-16				10803	0.579653	127	8868	0.536414	144	11758	0.661677	127		121	11883	638
2019-02-17				10257	0.550357	128	8326	0.503629	145	11721	0.659595	128		122	11935	638
2019-02-18				9522	0.510919	129	8610	0.520808	146	11607	0.65318	129		123	11512	638
2019-02-19				10058	0.539679	130	8480	0.512945	147	11564	0.65076	130		124	11499	638
2019-02-20				10058	0.539679	131	8480	0.512945	148	11582	0.651773	131		125	11456	638
2019-02-21				9820	0.526909	132	8027.5	0.485573	149	10515	0.591728	132		126	11480	638
2019-02-22				10168	0.545581	133	8027.5	0.485573	150	11419	0.6426	133		127	11276	638
2019-02-23				10396	0.557815	134	7230.5	0.437364	151	11120	0.625774	134		128	11190	638
2019-02-24				9971	0.535011	135	7230.5	0.437364	152	11009	0.619527	135		129	10671	638
2019-02-25				9523	0.510973	136	8597	0.520022	153	10853	0.610748	136		130	10939	638
2019-02-26				10951	0.587595	137	8597	0.520022	154	10769	0.606021	137		131	10861	638
2019-02-27				9346	0.501476	138	8898.5	0.538259	155	10558	0.594147	138		132	10358	638
2019-02-28				9791	0.525353	139	8898.5	0.538259	156	11298	0.635791	139		133	10268	638
2019-03-01				9348	0.501583	140	8765	0.530184	157	10738	0.604277	140		134	10802	638
2019-03-02				9805	0.526104	141	8765	0.530184	158	11014	0.619809	141		135	10559	638
2019-03-03				9317	0.49992	142	8753	0.529458	159	10971	0.617389	142		136	10109	638
2019-03-04				9846	0.528304	143	8753	0.529458	160	10784	0.606866	143		137	10681	638
2019-03-05				9279	0.497881	144	8675	0.52474	161	10551	0.593754	144		138	9753	638
2019-03-06				9747	0.522992	145	8675	0.52474	162	10655	0.599606	145		139	10313	638
2019-03-07				9308	0.499437	146	8469	0.512279	163	10733	0.603995	146		140	9903	638
2019-03-08				9579	0.513978	147	8469	0.512279	164	10344	0.582105	147		141	10097	638
2019-03-09				9546	0.512207	148	8376.5	0.506684	165	10554	0.593922	148		142	9800	638
2019-03-10				9517	0.510651	149	8376.5	0.506684	166	9895	0.556837	149		143	9853	638
2019-03-11				9600	0.515104	150	8230.5	0.497853	167	10450	0.58807	150		144	9566	638
2019-03-12				9957	0.53426	151	8230.5	0.497853	168	10713	0.60287	151		145	9576	638
2019-03-13				9955	0.534152	152	7970.5	0.482126	169	11005	0.619302	152		146	9550	638
2019-03-14				9947	0.533723	153	7970.5	0.482126	170	11110	0.625211	153		147	9468	638
2019-03-15				10213	0.547996	154	8145	0.492681	171	10807	0.60816	154		148	9527	638
2019-03-16				10413	0.558727	155	8145	0.492681	172	11041	0.621328	155		149	9146	638
2019-03-17				10573	0.567312	156	9159	0.554016	173	10217	0.574958	156		150	9359	638
2019-03-18				10416	0.558888	157	9159	0.554016	174	10242	0.576365	157		151	9300	638
2019-03-19				10605	0.569029	158	7300	0.441568	175	10623	0.597805	158		152	9397	638
2019-03-20				10271	0.551108	159	7300	0.441568	176	10543	0.593303	159		153	9885	638
2019-03-21				10474	0.562	160	8472	0.512461	177	10354	0.582667	160		154	9872	638
2019-03-22				10310	0.553201	161	8472	0.512461	178	10618	0.597524	161		155	10117	638
2019-03-23				10246	0.549767	162	8613	0.52099	179	10477	0.589589	162		156	9896	638
2019-03-24				10728	0.575629	163	8613	0.52099	180	10962	0.616882	163		157	9808	638
2019-03-25				10456	0.561035	164	8952.5	0.541526	181	10662	0.6	164		158	9998	638
2019-03-26				10626	0.570156	165	8952.5	0.541526	182	10719	0.603208	165		159	9856	638
2019-03-27				10748	0.576702	166	9812	0.593516	183	10334	0.581542	166		160	9860	638
2019-03-28				11147	0.598111	167	9812	0.593516	184	10577	0.595217	167		161	9868	638
2019-03-29				11371	0.61013	168	10094	0.610573	185	10284	0.578728	168		162	9799	638
2019-03-30				11229	0.602511	169	10060	0.608517	186	10343	0.582048	169		163	10053	638
2019-03-31				10907	0.585234	170	10498	0.635011	187	10646	0.5991	170		164	9862	638
2019-04-01				10939	0.586951	171	10598	0.64106	188	10984	0.61812	171		165	9907	638
2019-04-02				11034	0.592048	172	10657	0.644629	189	10854	0.610805	172		166	9819	638
2019-04-03				11300	0.606321	173	10271	0.62128	190	11117	0.625605	173		167	9985	638
2019-04-04				11652	0.625208	174	10216	0.617953	191	10837	0.609848	174		168	9962	638
2019-04-05				10677	0.572893	175	10906	0.65969	192	10866	0.61148	175		169	9847	638
2019-04-06				9881	0.530182	176	10856	0.656666	193	10416	0.586156	176		170	9841	638
2019-04-07				10468	0.561678	177	11136	0.673603	194	10627	0.59803	177		171	10023	638
2019-04-08				10223	0.548532	178	11108	0.671909	195	10444	0.587732	178		172	10011	638
2019-04-09				10340	0.55481	179	10892	0.658843	196	10614	0.597299	179		173	10525	638
2019-04-10				9569	0.513441	180	10759	0.650798	197	11221	0.631458	180		174	10549	638
2019-04-11				9635	0.516982	181	10883	0.658299	198	10700	0.602138	181		175	9614	638
2019-04-12				10200	0.547298	182	10438	0.631382	199	11491	0.646652	182		176	9199	638
2019-04-13				9950	0.533884	183	10983	0.664348	200	11097	0.624479	183		177	9856	638
2019-04-14				10709	0.57461	184	10873	0.657694	201	10609	0.597017	184		178	9713	638
2019-04-15				10621	0.569888	185	11006	0.665739	202	10741	0.604446	185		179	9856	638
2019-04-16				10304	0.552879	186	10073	0.609303	203	10274	0.578165	186		180	9801	638
2019-04-17				10103	0.542094	187	9996	0.604646	204	10464	0.588858	187		181	9762	638
2019-04-18				10887	0.584161	188	10201	0.617046	205	9878	0.555881	188		182	10214	638
2019-04-19				9934	0.533026	189	10386	0.628236	206	10366	0.583343	189		183	10286	638
2019-04-20				10014	0.537318	190	9779	0.591519	207	10536	0.592909	190		184	10377	638
2019-04-21				9303	0.499168	191	9808	0.593274	208	10843	0.610186	191		185	10485	638
2019-04-22				9252	0.496432	192	9729	0.588495	209	9960	0.560495	192		186	10213	638
2019-04-23				9448	0.506949	193	9817	0.593818	210	10280	0.578503	193		187	10355	638
2019-04-24				9617	0.516017	194	9684	0.585773	211	10449	0.588014	194		188	10454	638
2019-04-25				9522	0.510919	195	9803	0.592971	212	10157	0.571581	195		189	10319	638
2019-04-26				9688	0.519826	196	9394	0.568231	213	10085	0.56753	196		190	10274	638
2019-04-27				9950	0.533884	197	8925	0.539862	214	9882	0.556106	197		191	10121	638
2019-04-28				9704	0.520685	198	8798	0.53218	215	9455	0.532077	198		192	10039	638
2019-04-29				9219	0.494661	199	9090	0.549843	216	9272	0.521778	199		193	10195	638
2019-04-30				9921	0.532328	200	9063	0.54821	217	9023	0.507766	200		194	10401	638
2019-05-01				10144	0.544294	201	9016	0.545367	218	9312	0.524029	201		195	10262	638
2019-05-02				10029	0.538123	202	9144	0.553109	219	8864	0.498818	202		196	10222	638
2019-05-03				9707	0.520846	203	9450	0.571619	220	8508	0.478784	203		197	10197	638
2019-05-04				9390	0.503836	204	9152.5	0.553623	221	8720	0.490715	204		198	10014	638
2019-05-05				9426	0.505768	205	9152.5	0.553623	222	8718	0.490602	205		199	9643	638
2019-05-06				9919	0.532221	206	8748.5	0.529186	223	8683	0.488633	206		200	9976	638
2019-05-07				9441	0.506573	207	8748.5	0.529186	224	8551	0.481204	207		201	10110	638
2019-05-08				7577	0.406557	208	8311.5	0.502752	225	8959	0.504164	208		202	9966	638
2019-05-09				8634	0.463272	209	8311.5	0.502752	226	9307	0.523748	209		203	9429	638
2019-05-10				8166	0.438161	210	8485.5	0.513277	227	9920	0.558244	210		204	9369	638
2019-05-11				7040	0.377743	211	8485.5	0.513277	228	6913	0.389026	211		205	9448	638
2019-05-12				6939	0.372324	212	8217	0.497036	229	8444	0.475183	212		206	9663	638
2019-05-13				6939	0.372324	213	8217	0.497036	230	5396	0.303658	213		207	9257	638
2019-05-14				7046.5	0.378092	214	7231	0.437394	231	9833	0.553348	214		208	8781	638
2019-05-15				7046.5	0.378092	215	7231	0.437394	232	8011	0.450816	215		209	9223	638
2019-05-16				6856	0.36787	216	7144	0.432132	233	7461	0.419865	216		210	9301	638
2019-05-17				6856	0.36787	217	7144	0.432132	234	7127	0.401069	217		211	7879	638
2019-05-18				5788.5	0.310592	218	7254	0.438785	235	5863	0.329938	218		212	8395	638
2019-05-19				5788.5	0.310592	219	7254	0.438785	236	4745	0.267023	219		213	7243	638
2019-05-20				4721.5	0.25334	220	5426	0.328212	237	4695	0.264209	220		214	8601	638
2019-05-21				4721.5	0.25334	221	5426	0.328212	238	4125	0.232133	221		215	7952	638
2019-05-22				2047.5	0.109862	222	4916.5	0.297393	239	4125	0.232133	222		216	7802	638
2019-05-23				2047.5	0.109862	223	4916.5	0.297393	240	1592	0.0895892	223		217	7682	638
2019-05-24				1779.5	0.0954821	224	4603.5	0.27846	241	1592	0.0895892	224		218	6889	638
2019-05-25				1779.5	0.0954821	225	4603.5	0.27846	242	1510.5	0.0850028	225		219	6559	638
2019-05-26							3369	0.203787	243	1510.5	0.0850028	226		220	4352	782
2019-05-27							3369	0.203787	244					221	4067	782
2019-05-28														222	3939	1107
2019-05-29														223	1406	1107
2019-05-30														224	1406	1107
2019-05-31														225	1325	1107
														227	9197	1107
														228	9197	1107
														229	8929	1107
														230	8929	1107
														231	7943	1107
														232	7943	1107
														233	7856	1107
														234	7856	1107
														235	7966	1107
														236	7966	1107
														237	6138	1107
														238	6138	1107
														239	5628	1107
														240	5628	1107
														241	5315	1107
														242	5315	1107
														243	4081	1107
														244	4081	1107

## Sheet: Smoothed volume
Date	Nikau 78305 2021/22 Litres		ratio	Days from Peak	Nikau 78305 2020/21 Litres		ratio	Days from Peak	Nikau 78305 2019/20 Litres		ratio	Days from Peak	Nikau 78305 2018/19 Litres		ratio	Days from Peak		Means for smoothed volume
2018-07-24					474.5		0	-78	1792.5		0	-79						Term	Fitted Mean	SE Mean
2018-07-25	886	1146.33	0.0710702	-70	474.5	627.75	0.0348607	-77	1792.5	1935	0.121577	-78		613				Year
2018-07-26	886	1276.5	0.0791402	-69	781	822.4	0.0456701	-76	2077.5	2073.6	0.130286	-77		613				2018	11922.6	47.1
2018-07-27	1667	1574.9	0.0976404	-68	781	1047.7	0.0581816	-75	2077.5	2240.7	0.140785	-76	613	740.333	0.0425342	-75		2019	11185.9	47.7
2018-07-28	1667	1951.4	0.120983	-67	1601	1487.6	0.0826105	-74	2628	2499.4	0.157039	-75	613	804	0.046192	-74		2020	12132.2	45.5
2018-07-29	2768.5	2339.4	0.145038	-66	1601	1866.2	0.103635	-73	2628	2701.1	0.169712	-74	995	920	0.0528566	-73		Days from Peak
2018-07-30	2768.5	2918.9	0.180965	-65	2674	2444.2	0.135733	-72	3086	3038.5	0.190911	-73	995	1074.2	0.0617158	-72		-77	242	794	0.0399559
2018-07-31	2826	3498.4	0.216893	-64	2674	2858.2	0.158724	-71	3086	3265.8	0.205192	-72	1384	1292.5	0.0742577	-71		-76	437	794
2018-08-01	4564.5	3973.1	0.246324	-63	3671	3460.1	0.192149	-70	3764.5	3964.2	0.249073	-71	1384	1434.4	0.0824103	-70		-75	614	561
2018-08-02	4564.5	4540.4	0.281495	-62	3671	3847.4	0.213657	-69	3764.5	4153.2	0.260948	-70	1704.5	1629.9	0.0936423	-69		-74	865	561
2018-08-03	5142	5096.2	0.315953	-61	4610.5	4384.7	0.243494	-68	6120	4342.2	0.272823	-69	1704.5	1747.6	0.100404	-68		-73	1113	561
2018-08-04	5605	5488.8	0.340294	-60	4610.5	4722.6	0.262259	-67	4031	4693.9	0.294921	-68	1972.5	1974.2	0.113423	-67		-72	1479	561
2018-08-05	5605	5881.4	0.364634	-59	5360.5	5278.7	0.293141	-66	4031	5150.7	0.323622	-67	1972.5	2136.7	0.122759	-66		-71	1795	561
2018-08-06	6527.5	6257.2	0.387933	-58	5360.5	5646.9	0.313588	-65	5523	5136.4	0.322723	-66	2517	2459.7	0.141317	-65		-70	2167	561
2018-08-07	6527.5	6540.4	0.405491	-57	6451.5	6202.4	0.344436	-64	6048.5	5728.3	0.359913	-65	2517	2729.1	0.156794	-64		-69	2458	561
2018-08-08	7021	6994.7	0.433656	-56	6451.5	6607.9	0.366955	-63	6048.5	6320.2	0.397102	-64	3319.5	3115.1	0.178971	-63		-68	2786	561
2018-08-09	7021	7264.5	0.450383	-55	7388	7200.1	0.399841	-62	6990.5	6696.3	0.420733	-63	3319.5	3392.2	0.194891	-62		-67	3068	561
2018-08-10	7876.5	7691.8	0.476875	-54	7388	7574.1	0.42061	-61	6990.5	6967.3	0.43776	-62	3902.5	3854.8	0.221469	-61		-66	3427	561
2018-08-11	7876.5	8020.4	0.497247	-53	8321.5	8091.6	0.449349	-60	7403.5	7415.7	0.465933	-61	3902.5	4156.9	0.238825	-60		-65	3773	561
2018-08-12	8664	8386.2	0.519926	-52	8321.5	8421.8	0.467686	-59	7403.5	7675.7	0.482269	-60	4830	4621.7	0.265529	-59		-64	4185	561
2018-08-13	8664	8660.3	0.53692	-51	9039	8800.6	0.488721	-58	8290.5	8117.3	0.510015	-59	4830	4969.9	0.285535	-58		-63	4581	561
2018-08-14	8850	9040.4	0.560485	-50	9039	9055.9	0.502899	-57	8290.5	8476.3	0.532571	-58	5643.5	5444.3	0.31279	-57		-62	7172	561
2018-08-15	9247	9293.4	0.576171	-49	9282	9431.6	0.523762	-56	9198.5	8899.6	0.559168	-57	5643.5	5733.2	0.329388	-56		-61	7583	561
2018-08-16	9777	9571.2	0.593394	-48	9598	9596.8	0.532936	-55	9198.5	9096.3	0.571526	-56	6274.5	6181.5	0.355144	-55		-60	7972	561
2018-08-17	9929	9842.2	0.610195	-47	10200	9916.8	0.550707	-54	9520	9403.2	0.590809	-55	6274.5	6467.1	0.371553	-54		-59	8357	561
2018-08-18	10053	10057.4	0.623537	-46	9865	10170.2	0.564779	-53	9274	9581.5	0.602012	-54	7071.5	6882.6	0.395424	-53		-58	8726	561
2018-08-19	10205	10258.2	0.635986	-45	10639	10400.2	0.577551	-52	9825	9882.4	0.620918	-53	7071.5	7236.5	0.415757	-52		-57	9066	561
2018-08-20	10323	10430.8	0.646687	-44	10549	10443	0.579928	-51	10090	10220	0.642129	-52	7721	7679.6	0.441214	-51		-56	9352	561
2018-08-21	10781	10604.4	0.65745	-43	10748	10685.4	0.593389	-50	10703	10580.2	0.664761	-51	8044	8042.5	0.462064	-50		-55	9588	561
2018-08-22	10792	10725	0.664927	-42	10414	10856	0.602863	-49	11208	10913.8	0.685721	-50	8490	8437	0.484729	-49		-54	9837	561
2018-08-23	10921	10877.8	0.6744	-41	11077	10973.8	0.609405	-48	11075	11303	0.710175	-49	8886	8718	0.500873	-48		-53	10114	561
2018-08-24	10808	10992.4	0.681505	-40	11492	11135.8	0.618401	-47	11493	11415.6	0.71725	-48	9044	8921.8	0.512582	-47		-52	10398	561
2018-08-25	11087	11118	0.689292	-39	11138	11301.8	0.62762	-46	12036	11611.4	0.729552	-47	9126	9158.8	0.526198	-46		-51	9568	458
2018-08-26	11354	11206.8	0.694797	-38	11558	11444	0.635517	-45	11266	11893.2	0.747257	-46	9063	9360.8	0.537804	-45		-50	9881	458
2018-08-27	11420	11392.2	0.706292	-37	11244	11560.6	0.641992	-44	12187	12068.2	0.758253	-45	9675	9579	0.55034	-44		-49	10199	458
2018-08-28	11365	11514.6	0.71388	-36	11788	11733.8	0.65161	-43	12484	12153.6	0.763619	-44	9896	9741.2	0.559659	-43		-48	10369	458
2018-08-29	11735	11679.8	0.724122	-35	12075	11889.6	0.660262	-42	12368	12480.6	0.784164	-43	10135	10041	0.576883	-42		-47	10556	458
2018-08-30	11699	11885.4	0.736869	-34	12004	12119.6	0.673034	-41	12463	12539.4	0.787859	-42	9937	10238.2	0.588213	-41		-46	10785	458
2018-08-31	12180	12108.6	0.750707	-33	12337	12363.8	0.686596	-40	12901	12579.6	0.790384	-41	10562	10513.4	0.604024	-40		-45	10958	458
2018-09-01	12448	12204	0.756621	-32	12394	12523.2	0.695447	-39	12481	12682.8	0.796869	-40	10661	10723.8	0.616112	-39		-44	11098	458
2018-09-02	12481	12373	0.767099	-31	13009	12701.4	0.705343	-38	12685	12756.8	0.801518	-39	11272	11012.2	0.632681	-38		-43	11319	458
2018-09-03	12212	12483	0.773919	-30	12872	13014.2	0.722714	-37	12884	12794.4	0.80388	-38	11187	11066	0.635772	-37		-42	11490	458
2018-09-04	12544	12534	0.777081	-29	12895	13222	0.734254	-36	12833	12954.8	0.813958	-37	11379	11250.4	0.646367	-36		-41	11646	458
2018-09-05	12730	12638	0.783528	-28	13901	13434	0.746027	-35	13089	13040.2	0.819324	-36	10831	11270.8	0.647539	-35		-40	11853	458
2018-09-06	12703	12855.8	0.797032	-27	13433	13672	0.759243	-34	13283	13077.4	0.821661	-35	11583	11461.6	0.658501	-34		-39	12001	458
2018-09-07	13001	12997	0.805786	-26	14069	13960.2	0.775248	-33	13112	13240.8	0.831928	-34	11374	11604	0.666682	-33		-38	12169	458
2018-09-08	13301	13106.2	0.812556	-25	14062	14098.4	0.782923	-32	13070	13426	0.843564	-33	12141	12013.2	0.690192	-32		-37	12345	458
2018-09-09	13250	13267.4	0.82255	-24	14336	14392	0.799227	-31	13650	13503.6	0.84844	-32	12091	12121.8	0.696431	-31		-36	12504	458
2018-09-10	13276	13209.2	0.818942	-23	14592	14453.2	0.802626	-30	14015	13632.6	0.856545	-31	12877	12427.8	0.714012	-30		-35	12594	458
2018-09-11	13509	13235.4	0.820566	-22	14901	14503.6	0.805424	-29	13671	13776.2	0.865568	-30	12126	12522.4	0.719447	-29		-34	12791	458
2018-09-12	12710	13275	0.823021	-21	14375	14642.4	0.813132	-28	13757	13994.2	0.879265	-29	12904	12755.4	0.732833	-28		-33	12997	458
2018-09-13	13432	13419.2	0.831961	-20	14314	14688	0.815665	-27	13788	14139.6	0.8884	-28	12614	12779.2	0.7342	-27		-32	13205	458
2018-09-14	13448	13695.2	0.849073	-19	15030	14782	0.820885	-26	14740	14314.6	0.899396	-27	13256	13058.6	0.750253	-26		-31	13382	458
2018-09-15	13997	13762.8	0.853264	-18	14820	14963.8	0.830981	-25	14742	14418.2	0.905905	-26	12996	13191.2	0.757871	-25		-30	13552	458
2018-09-16	14889	13925.4	0.863344	-17	15371	15238.6	0.846241	-24	14546	14629.6	0.919187	-25	13523	13434.4	0.771844	-24		-29	13673	458
2018-09-17	13048	14075.8	0.872669	-16	15284	15305	0.849928	-23	14275	14609	0.917893	-24	13567	13784.8	0.791975	-23		-28	13846	458
2018-09-18	14245	14181.6	0.879228	-15	15688	15416.4	0.856115	-22	14845	14702.2	0.923749	-23	13830	13444	0.772395	-22		-27	13927	458
2018-09-19	14200	14081.8	0.873041	-14	15362	15525.8	0.86219	-21	14637	14759.2	0.92733	-22	15008	13782	0.791814	-21		-26	14086	458
2018-09-20	14526	14532.2	0.900965	-13	15377	15708.4	0.87233	-20	15208	15005.6	0.942812	-21	11292	14037.1	0.80647	-20		-25	14262	458
2018-09-21	14390	14646.2	0.908032	-12	15918	15691.2	0.871375	-19	14831	15144.4	0.951532	-20	15213	14165.5	0.813847	-19		-24	14427	458
2018-09-22	15300	14816.6	0.918597	-11	16197	15805.8	0.877739	-18	15507	15420.4	0.968874	-19	14842.5	14280.5	0.820454	-18		-23	14597	458
2018-09-23	14815	14969.2	0.928058	-10	15602	15936.6	0.885003	-17	15539	15685.2	0.985511	-18	14472	15157.3	0.870829	-17		-22	14540	458
2018-09-24	15052	15056	0.933439	-9	15935	15913.6	0.883726	-16	16017	15814.6	0.993642	-17	15583	15145.1	0.870128	-16		-21	14771	458
2018-09-25	15289	15001.8	0.930079	-8	16031	15725.8	0.873297	-15	16532	15825	0.994295	-16	15676	15514.4	0.891345	-15		-20	14963	458
2018-09-26	14824	15088.6	0.93546	-7	15803	15710.2	0.87243	-14	15478	15880.8	0.997801	-15	15152	15869.4	0.911741	-14		-19	15092	458
2018-09-27	15029	15211.4	0.943074	-6	15258	15739.4	0.874052	-13	15559	15701	0.986504	-14	16689	15974.4	0.917774	-13		-18	15257	458
2018-09-28	15249	15299.7	0.948548	-5	15524	15666.2	0.869987	-12	15818	15472.4	0.972141	-13	16247	16116.9	0.925961	-12		-17	15636	458
2018-09-29	15666	15493.9	0.960588	-4	16081	15687.2	0.871153	-11	15118	15462.6	0.971525	-12	16108	16364.2	0.940169	-11		-16	15628	458
2018-09-30	15730.5	15685.3	0.972454	-3	15665	15837.6	0.879505	-10	15389	15493.6	0.973473	-11	16388.5	16386.8	0.941467	-10		-15	15707	458
2018-10-01	15795	16009.3	0.992542	-2	15908	15973	0.887024	-9	15429	15514.8	0.974805	-10	16388.5	16440.6	0.944558	-9		-14	15760	458
2018-10-02	15986	15789.5	0.978915	-1	16010	16150.6	0.896887	-8	15714	15639.2	0.982621	-9	16802	16659.8	0.957152	-8		-13	15729	458
2018-10-03	16869	15698	0.973242	0	16201	16420.6	0.911881	-7	15924	15666.6	0.984343	-8	16516	16655.1	0.956882	-7		-12	15749	458
2018-10-04	14567	15701.6	0.973465	1	16969	16706	0.92773	-6	15740	15800.4	0.992749	-7	17204	16760.2	0.96292	-6		-11	15848	458
2018-10-05	15273	15577.6	0.965777	2	17015	17011.2	0.944678	-5	15526	15853.4	0.996079	-6	16365	16831.4	0.967011	-5		-10	15913	458
2018-10-06	15813	15314.2	0.949447	3	17335	17269.4	0.959017	-4	16098	15628.4	0.981942	-5	16914	17082.2	0.98142	-4		-9	16018	458
2018-10-07	15366	15278	0.947203	4	17536	17425.8	0.967702	-3	15979	15641	0.982734	-4	17158	16963.4	0.974594	-3		-8	16159	458
2018-10-08	15552	15289.4	0.947909	5	17492	17587.6	0.976687	-2	14799	15778.8	0.991392	-3	17770	17155	0.985602	-2		-7	16292	458
2018-10-09	14386	15217.4	0.943446	6	17751	17787.2	0.987772	-1	15803	15848.4	0.995765	-2	16610	17291.8	0.993462	-1		-6	16440	458
2018-10-10	15330	15173	0.940693	7	17824	18007.4	1	0	16215	15866.2	0.996884	-1	17323	17405.6	1	0		-5	16490	458
2018-10-11	15453	15280.2	0.947339	8	18333	17778.6	0.987294	1	16446	15915.8	1	0	17598	17320.8	0.995128	1		-4	16664	458
2018-10-12	15144	15697	0.97318	9	18637	17716.2	0.983829	2	16068	15688.6	0.985725	1	17727	17305.8	0.994266	2		-3	16723	458
2018-10-13	16088	15668	0.971382	10	16348	17525.4	0.973233	3	15047	15560.6	0.977683	2	17346	17235.6	0.990233	3		-2	16864	458
2018-10-14	16470	15796.2	0.97933	11	17439	17214.2	0.955951	4	14667	15344	0.964073	3	16535	17103.4	0.982638	4		-1	16982	458
2018-10-15	15185	15993.2	0.991543	12	16870	16855.2	0.936015	5	15575	15200.8	0.955076	4	16972	16970.8	0.97502	5		0	17110	458
2018-10-16	16094	15984.4	0.990998	13	16777	16969.6	0.942368	6	15363	15381	0.966398	5	16937	16988	0.976008	6		1	16929	458
2018-10-17	16129	15868	0.983781	14	16842	16901.2	0.93857	7	15352	15599.6	0.980133	6	17064	17132.4	0.984304	7		2	16861	458
2018-10-18	16044	15892	0.985269	15	16920	16957	0.941668	8	15948	15504.6	0.974164	7	17432	17061.4	0.980225	8		3	16702	458
2018-10-19	15888	15840.4	0.98207	16	17097	16883	0.937559	9	15760	15382.6	0.966499	8	17257	17068	0.980604	9		4	16506	458
2018-10-20	15305	15711.4	0.974073	17	17149	16819.4	0.934027	10	15100	15354.6	0.964739	9	16617	17026	0.978191	10		5	16402	458
2018-10-21	15836	15676.2	0.97189	18	16407	16767.8	0.931162	11	14753	15214.2	0.955918	10	16970	16829	0.966873	11		6	16519	458
2018-10-22	15484	15780.4	0.97835	19	16524	16802.6	0.933094	12	15212	15024.4	0.943993	11	16854	16577.8	0.952441	12		7	16513	458
2018-10-23	15868	15973.4	0.990316	20	16662	16689.4	0.926808	13	15246	15082.2	0.947624	12	16447	16446.8	0.944914	13		8	16467	458
2018-10-24	16409	15954.2	0.989126	21	17271	16762.6	0.930873	14	14811	15178.2	0.953656	13	16001	16440.4	0.944547	14		9	16435	458
2018-10-25	16270	16047.8	0.994929	22	16583	16679.2	0.926241	15	15389	15259	0.958733	14	15962	16430.4	0.943972	15		10	16353	458
2018-10-26	15740	16129.6	1	23	16773	16628.6	0.923431	16	15233	15280.8	0.960103	15	16938	16537.4	0.95012	16		11	16207	458
2018-10-27	15952	15947	0.988679	24	16107	16328.2	0.906749	17	15616	15482.4	0.972769	16	16804	16724.2	0.960852	17		12	16154	458
2018-10-28	16277	15667.4	0.971345	25	16409	16298.6	0.905106	18	15355	15537.6	0.976237	17	16982	16907.4	0.971377	18		13	16105	458
2018-10-29	15496	15369	0.952844	26	15769	16159.8	0.897398	19	15819	15589.6	0.979505	18	16935	16873.2	0.969412	19		14	16154	458
2018-10-30	14872	15367.2	0.952733	27	16435	16256.6	0.902773	20	15665	15613	0.980975	19	16878	16835.2	0.967229	20		15	16130	458
2018-10-31	14248	15137	0.938461	28	16079	16169	0.897909	21	15493	15691.4	0.985901	20	16767	16691	0.958944	21		16	16216	458
2018-11-01	15943	15253.8	0.945702	29	16591	16292.8	0.904784	22	15733	15410.6	0.968258	21	16614	16600	0.953716	22		17	16197	458
2018-11-02	15126	15361.6	0.952386	30	15971	16048.8	0.891234	23	15747	15229.6	0.956886	22	16261	16420	0.943375	23		18	16265	458
2018-11-03	16080	15710.2	0.973998	31	16388	16022	0.889745	24	14415	15126.8	0.950427	23	16480	16332.4	0.938342	24		19	16215	458
2018-11-04	15411	15635.2	0.969348	32	15215	15921.2	0.884148	25	14760	15093	0.948303	24	15978	16323.2	0.937813	25		20	16261	458
2018-11-05	15991	15806	0.979938	33	15945	16022.4	0.889768	26	14979	14919.4	0.937396	25	16329	16345.8	0.939112	26		21	16090	458
2018-11-06	15568	15612.2	0.967922	34	16087	15927.4	0.884492	27	15564	15095	0.948429	26	16568	16483.2	0.947006	27		22	16041	458
2018-11-07	15980	15574.8	0.965604	35	16477	16186.2	0.898864	28	14879	15197.4	0.954862	27	16374	16629.8	0.955428	28		23	15865	458
2018-11-08	15111	15488.6	0.960259	36	15913	15946.2	0.885536	29	15293	15252.6	0.958331	28	17167	16722.8	0.960771	29		24	15816	458
2018-11-09	15224	15183	0.941313	37	16509	15866.6	0.881116	30	15272	15187.6	0.954247	29	16711	16644.8	0.95629	30		25	15721	458
2018-11-10	15560	14973.6	0.928331	38	14745	15595.4	0.866055	31	15255	15164.8	0.952814	30	16794	16692.4	0.959025	31		26	15821	458
2018-11-11	14040	15082.8	0.935101	39	15689	15423.2	0.856492	32	15239	15077.4	0.947323	31	16178	16552	0.950958	32		27	15869	458
2018-11-12	14933	15109.8	0.936775	40	15121	15191.2	0.843609	33	14765	15015.2	0.943415	32	16612	16344.4	0.939031	33		28	16023	458
2018-11-13	15657	15069.6	0.934282	41	15052	15142.6	0.84091	34	14856	14961.4	0.940034	33	16465	16157	0.928264	34		29	15952	458
2018-11-14	15359	15266.6	0.946496	42	15349	14829.4	0.823517	35	14961	14919	0.93737	34	15673	16137.6	0.92715	35		30	15892	458
2018-11-15	15359	15147.4	0.939106	43	14502	14735.4	0.818297	36	14986	14908.6	0.936717	35	15857	15907.6	0.913936	36		31	15788	458
2018-11-16	15025	14956.8	0.927289	44	14123	14665.2	0.814399	37	15027	14825.6	0.931502	36	16081	15956.4	0.916739	37		32	15663	458
2018-11-17	14337	14904.2	0.924028	45	14651	14590.8	0.810267	38	14713	14780.2	0.92865	37	15462	16125.8	0.926472	38		33	15499	458
2018-11-18	14704	14902	0.923891	46	14701	14736.6	0.818364	39	14441	14518.2	0.912188	38	16709	16329.8	0.938192	39		34	15406	458
2018-11-19	15096	14861	0.92135	47	14977	14944.6	0.829914	40	14734	14289	0.897787	39	16520	16307.8	0.936928	40		35	15292	458
2018-11-20	15348	15015	0.930897	48	15231	15071.4	0.836956	41	13676	14161.2	0.889757	40	16877	16269	0.934699	41		36	15156	458
2018-11-21	14820	15122.2	0.937543	49	15163	15187	0.843376	42	13881	14100.6	0.88595	41	15971	16121.2	0.926208	42		37	15134	458
2018-11-22	15107	15128.8	0.937949	50	15285	15280.6	0.848573	43	14074	14047.6	0.88262	42	15268	16000.4	0.919267	43		38	15078	458
2018-11-23	15240	15055.7	0.933418	51	15279	15906.6	0.883337	44	14138	14161	0.889745	43	15970	15787.4	0.90703	44		39	15118	458
2018-11-24					15445	15237.8	0.846197	45	14469	14029	0.881451	44	15916	15727.2	0.903571	45		40	15138	458
2018-11-25					18361	15262.4	0.847563	46	14243	13932	0.875357	45	15812	15725	0.903445	46		41	15147	458
2018-11-26					11819	15202.6	0.844242	47	13221	13848.6	0.870116	46	15670	15633.6	0.898194	47		42	15119	458
2018-11-27					15408	15264.2	0.847663	48	13589	13595.2	0.854195	47	15257	15516.8	0.891483	48		43	15147	458
2018-11-28					14980	14607.6	0.8112	49	13721	13405	0.842245	48	15513	15401.4	0.884853	49		44	15241	458
2018-11-29					15753	15240.8	0.846363	50	13202	13448.4	0.844972	49	15332	15224.6	0.874696	50		45	14966	458
2018-11-30					15078	15059	0.836267	51	13292	13408.8	0.842484	50	15235	15153.6	0.870616	51		46	14945	458
2018-12-01					14985	14959.4	0.830736	52	13438	13271.6	0.833863	51	14786	14988.6	0.861137	52		47	14810	458
2018-12-02					14499	14692.4	0.815909	53	13391	13283.8	0.83463	52	14902	14791.8	0.84983	53		48	14729	458
2018-12-03					14482	14469.4	0.803525	54	13035	13172.4	0.82763	53	14688	14651.6	0.841775	54		49	14486	458
2018-12-04					14418	14187.2	0.787854	55	13263	13043.6	0.819538	54	14348	14516.6	0.834019	55		50	14625	458
2018-12-05					13963	14397.4	0.799527	56	12735	12862	0.808128	55	14534	14453.6	0.830399	56		51	14495	458
2018-12-06					13574	14551	0.808057	57	12794	12943	0.813217	56	14111	14376.2	0.825953	57		52	14411	458
2018-12-07					15550	14619.8	0.811877	58	12483	12990.6	0.816208	57	14587	13304.8	0.764398	58		53	14219	458
2018-12-08					15250	14907.6	0.82786	59	13440	13025	0.818369	58	14301	13297.6	0.763984	59		54	14055	458
2018-12-09					14762	15075.2	0.837167	60	13501	13017.6	0.817904	59	8991	13437.8	0.772039	60		55	13855	458
2018-12-10					15402	14830.6	0.823584	61	12907	13130.2	0.824979	60	14498	13405.8	0.7702	61		56	13931	458
2018-12-11					14412	14627.2	0.812288	62	12757	13030	0.818683	61	14812	13461.4	0.773395	62		57	13973	458
2018-12-12					14327	14671.8	0.814765	63	13046	12936.2	0.81279	62	14427	14481.6	0.832008	63		58	13650	458
2018-12-13					14233	14450.4	0.80247	64	12939	13021	0.818118	63	14579	14408.6	0.827814	64		59	13741	458
2018-12-14					14985	14444.2	0.802126	65	13032	13129	0.824904	64	14092	14271	0.819909	65		60	13881	458
2018-12-15					14295	14493	0.804836	66	13331	13147.2	0.826047	65	14133	14180.6	0.814715	66		61	13755	458
2018-12-16					14381	14695.2	0.816065	67	13297	13174.4	0.827756	66	14124	14010.6	0.804948	67		62	13675	458
2018-12-17					14571	14731.4	0.818075	68	13137	13179	0.828045	67	13975	13927	0.800145	68		63	14058	458
2018-12-18					15244	14787.4	0.821185	69	13075	13166.8	0.827279	68	13729	13894.2	0.79826	69		64	13996	458
2018-12-19					15166	14847.6	0.824528	70	13055	13095.4	0.822792	69	13674	13956	0.801811	70		65	13954	458
2018-12-20					14575	14763	0.81983	71	13270	12922.6	0.811935	70	13969	14097.8	0.809958	71		66	13949	458
2018-12-21					14682	14590.6	0.810256	72	12940	12875	0.808945	71	14433	14328.4	0.823206	72		67	13962	458
2018-12-22					14148	14512.6	0.805924	73	12273	12760	0.801719	72	14684	14559.8	0.836501	73		68	13942	458
2018-12-23					14382	14483.2	0.804292	74	12837	12788.2	0.803491	73	14882	14791.8	0.84983	74		69	13926	458
2018-12-24					14776	14440.4	0.801915	75	12480	12771.8	0.80246	74	14831	14793.4	0.849922	75		70	13909	458
2018-12-25					14428	14453	0.802614	76	13411	12854.8	0.807675	75	15129	14730.2	0.846291	76		71	13912	458
2018-12-26					14468	14365.4	0.79775	77	12858	12781.8	0.803089	76	14441	14681.2	0.843476	77		72	13893	458
2018-12-27					14211	14248.4	0.791252	78	12688	12882.6	0.809422	77	14368	14657	0.842085	78		73	13954	458
2018-12-28					13944	14043.6	0.779879	79	12472	12707	0.798389	78	14637	14348.6	0.824367	79		74	14016	458
2018-12-29					14191	13780.6	0.765274	80	12984	12749	0.801028	79	14710	14282.8	0.820586	80		75	14030	458
2018-12-30					13404	13734.6	0.76272	81	12533	12760.6	0.801757	80	13587	14338.8	0.823804	81		76	13988	458
2018-12-31					13153	13724	0.762131	82	13068	12762.6	0.801882	81	14112	14299.8	0.821563	82		77	13976	458
2019-01-01					13981	13698.4	0.760709	83	12746	12734.8	0.800136	82	14648	14172.6	0.814255	83		78	13871	458
2019-01-02					13891	14084.2	0.782134	84	12482	12805	0.804546	83	14442	14224.8	0.817254	84		79	13714	458
2019-01-03					14063	14035.8	0.779446	85	12845	12815.6	0.805212	84	14074	14207.4	0.816255	85		80	13608	458
2019-01-04					15333	14054.4	0.780479	86	12884	12967.6	0.814763	85	13848	14064.6	0.80805	86		81	13612	458
2019-01-05					12911	13985.2	0.776636	87	13121	13042.2	0.81945	86	14025	13857.4	0.796146	87		82	13586	458
2019-01-06					14074	13918	0.772904	88	13506	13065.8	0.820933	87	13934	13568.4	0.779542	88		83	13559	458
2019-01-07					13545	13650.4	0.758044	89	12855	13064.2	0.820832	88	13406	13443.8	0.772384	89		84	13708	458
2019-01-08					13727	13863.4	0.769872	90	12963	12971	0.814976	89	12629	13149.6	0.755481	90		85	13737	458
2019-01-09					13995	13954.4	0.774926	91	12876	12979.6	0.815517	90	13225	12959	0.74453	91		86	13720	458
2019-01-10					13976	14059	0.780735	92	12655	12982.2	0.81568	91	12554	13001.4	0.746966	92		87	13636	458
2019-01-11					14529	14191.2	0.788076	93	13549	12989.4	0.816132	92	12981	13054.4	0.750011	93		88	13517	458
2019-01-12					14068	14199.8	0.788554	94	12868	13018.2	0.817942	93	13618	13043.6	0.749391	94		89	13355	458
2019-01-13					14388	14134.4	0.784922	95	12999	12965.8	0.81465	94	12894	13050	0.749759	95		90	13331	458
2019-01-14					14038	13912	0.772571	96	13020	12753.6	0.801317	95	13171	13062.4	0.750471	96		91	13299	458
2019-01-15					13649	13819.4	0.767429	97	12393	12758.2	0.801606	96	12586	12850.2	0.73828	97		92	13350	458
2019-01-16					13417	13587.4	0.754545	98	12488	12699.8	0.797937	97	13043	12947.6	0.743876	98		93	13421	458
2019-01-17					13605	13557.4	0.752879	99	12891	12643.4	0.794393	98	12557	12802	0.73551	99		94	13403	458
2019-01-18					13228	13617.6	0.756222	100	12707	12754	0.801342	99	13381	12736.2	0.73173	100		95	13313	458
2019-01-19					13888	13556.4	0.752824	101	12738	12781.4	0.803064	100	12443	12417.4	0.713414	101		96	13244	458
2019-01-20					13950	13554.6	0.752724	102	12946	12670.8	0.796115	101	12257	12346	0.709312	102		97	13123	458
2019-01-21					13111	13656.6	0.758388	103	12625	12429.6	0.78096	102	11449	12093.6	0.694811	103		98	13059	458
2019-01-22					13596	13599.2	0.755201	104	12338	12201.8	0.766647	103	12200	11936.8	0.685802	104		99	13038	458
2019-01-23					13738	13539.8	0.751902	105	11501	11935.6	0.749921	104	12119	11865.4	0.6817	105		100	13045	458
2019-01-24					13601	13652.8	0.758177	106	11599	11698	0.734993	105	11659	11931	0.685469	106		101	12882	458
2019-01-25					13653	13619.8	0.756345	107	11615	11538.6	0.724978	106	11900	11804.4	0.678196	107		102	12777	458
2019-01-26					13676	13571.2	0.753646	108	11437	11479.2	0.721246	107	11777	11864.8	0.681666	108		103	12651	458
2019-01-27					13431	13468	0.747915	109	11541	11437	0.718594	108	11567	12044.2	0.691973	109		104	12491	458
2019-01-28					13495	13306.2	0.73893	110	11204	11367.2	0.714209	109	12421	12038.2	0.691628	110		105	12368	458
2019-01-29					13085	13181	0.731977	111	11388	11398.4	0.716169	110	12556	12212.8	0.701659	111		106	12374	458
2019-01-30					12844	13121.6	0.728678	112	11266	11266.8	0.7079	111	11870	12307.6	0.707106	112		107	12301	458
2019-01-31					13050	12986.8	0.721192	113	11593	11264.8	0.707775	112	12650	12272.6	0.705095	113		108	12291	458
2019-02-01					13134	12929	0.717983	114	10883	11176	0.702195	113	12041	12259	0.704314	114		109	12293	458
2019-02-02					12821	12822.4	0.712063	115	11194	11070.4	0.69556	114	12246	12392.4	0.711978	115		110	12248	458
2019-02-03					12796	12626	0.701156	116	10944	10595.2	0.665703	115	12488	12276.2	0.705302	116		111	12220	458
2019-02-04					12311	12400.4	0.688628	117	10738	10596.8	0.665804	116	12537	12442.4	0.71485	117		112	12231	458
2019-02-05					12068	12259.2	0.680787	118	9217	10497.4	0.659558	117	12069	12412.6	0.713138	118		113	12145	458
2019-02-06					12006	12108.6	0.672424	119	10891	10298.6	0.647068	118	12872	12422.8	0.713724	119		114	12086	458
2019-02-07					12115	12163.6	0.675478	120	10697	10215.8	0.641865	119	12097	12426.4	0.713931	120		115	11937	458
2019-02-08					12043	12134.6	0.673867	121	9950	10243.2	0.643587	120	12539	12438	0.714598	121		116	11833	458
2019-02-09					12586	12079.4	0.670802	122	10324	10034.8	0.630493	121	12555	12355.8	0.709875	122		117	11780	458
2019-02-10					11923	11867	0.659007	123	9354	9820	0.616997	122	12127	12345.4	0.709277	123		118	11657	458
2019-02-11					11730	11665.8	0.647834	124	9849	9724.6	0.611003	123	12461	12221.2	0.702142	124		119	11582	458
2019-02-12					11053	11383.4	0.632151	125	9623	9482	0.59576	124	12045	12108.2	0.69565	125		120	11611	458
2019-02-13					11037	11225.2	0.623366	126	9473	9397.2	0.590432	125	11918	12066.6	0.69326	126		121	11536	458
2019-02-14					11174	11039.8	0.61307	127	9111	9201	0.578105	126	11990	11926	0.685182	127		122	11418	458
2019-02-15					11132	10880.6	0.604229	128	8930	8941.6	0.561807	127	11919	11861.2	0.681459	128		123	11312	458
2019-02-16					10803	10577.6	0.587403	129	8868	8769	0.550962	128	11758	11799	0.677885	129		124	11123	458
2019-02-17					10257	10354.4	0.575008	130	8326	8642.8	0.543033	129	11721	11713.8	0.67299	130		125	10963	458
2019-02-18					9522	10139.6	0.56308	131	8610	8552.8	0.537378	130	11607	11646.4	0.669118	131		126	10831	458
2019-02-19					10058	9943	0.552162	132	8480	8384.7	0.526816	131	11564	11397.8	0.654835	132		127	10636	458
2019-02-20					10058	9925.2	0.551173	133	8480	8325	0.523065	132	11582	11337.4	0.651365	133		128	10504	458
2019-02-21					9820	10100	0.560881	134	8027.5	8049.1	0.50573	133	10515	11240	0.645769	134		129	10340	458
2019-02-22					10168	10082.6	0.559914	135	8027.5	7799.2	0.490029	134	11419	11129	0.639392	135		130	10207	458
2019-02-23					10396	9975.6	0.553972	136	7230.5	7822.6	0.491499	135	11120	10983.2	0.631015	136		131	10057	458
2019-02-24					9971	10201.8	0.566534	137	7230.5	7936.5	0.498655	136	11009	11034	0.633934	137		132	9889	458
2019-02-25					9523	10037.4	0.557404	138	8597	8110.7	0.509601	137	10853	10861.8	0.624041	138		133	9771	458
2019-02-26					10951	9916.4	0.550685	139	8597	8444.3	0.530561	138	10769	10897.4	0.626086	139		134	9713	458
2019-02-27					9346	9791.8	0.543765	140	8898.5	8751.2	0.549844	139	10558	10843.2	0.622972	140		135	9678	458
2019-02-28					9791	9848.2	0.546897	141	8898.5	8784.8	0.551955	140	11298	10875.4	0.624822	141		136	9632	458
2019-03-01					9348	9521.4	0.528749	142	8765	8816	0.553915	141	10738	10915.8	0.627143	142		137	9782	458
2019-03-02					9805	9621.4	0.534303	143	8765	8786.9	0.552087	142	11014	10961	0.62974	143		138	9781	458
2019-03-03					9317	9519	0.528616	144	8753	8742.2	0.549278	143	10971	10811.6	0.621156	144		139	9855	458
2019-03-04					9846	9598.8	0.533048	145	8753	8724.2	0.548147	144	10784	10795	0.620203	145		140	9807	458
2019-03-05					9279	9499.4	0.527528	146	8675	8665	0.544428	145	10551	10738.8	0.616974	146		141	9847	458
2019-03-06					9747	9551.8	0.530437	147	8675	8608.2	0.540859	146	10655	10613.4	0.609769	147		142	9741	458
2019-03-07					9308	9491.8	0.527106	148	8469	8532.9	0.536128	147	10733	10567.4	0.607126	148		143	9775	458
2019-03-08					9579	9539.4	0.529749	149	8469	8473.2	0.532377	148	10344	10436.2	0.599589	149		144	9685	458
2019-03-09					9546	9510	0.528116	150	8376.5	8384.3	0.526791	149	10554	10395.2	0.597233	150		145	9686	458
2019-03-10					9517	9639.8	0.535324	151	8376.5	8336.6	0.523794	150	9895	10391.2	0.597003	151		146	9615	458
2019-03-11					9600	9715	0.5395	152	8230.5	8236.9	0.51753	151	10450	10523.4	0.604599	152		147	9566	458
2019-03-12					9957	9795.2	0.543954	153	8230.5	8155.7	0.512428	152	10713	10634.6	0.610987	153		148	9511	458
2019-03-13					9955	9934.4	0.551684	154	7970.5	8109.4	0.509519	153	11005	10817	0.621467	154		149	9453	458
2019-03-14					9947	10097	0.560714	155	7970.5	8092.3	0.508444	154	11110	10935.2	0.628258	155		150	9414	458
2019-03-15					10213	10220.2	0.567556	156	8145	8278	0.520112	155	10807	10836	0.622558	156		151	9423	458
2019-03-16					10413	10312.4	0.572676	157	8145	8515.7	0.535047	156	11041	10683.4	0.613791	157		152	9465	458
2019-03-17					10573	10444	0.579984	158	9159	8381.6	0.526621	157	10217	10586	0.608195	158		153	9513	458
2019-03-18					10416	10455.6	0.580628	159	9159	8212.6	0.516003	158	10242	10533.2	0.605162	159		154	9615	458
2019-03-19					10605	10467.8	0.581305	160	7300	8278	0.520112	159	10623	10395.8	0.597268	160		155	9770	458
2019-03-20					10271	10415.2	0.578384	161	7300	8140.6	0.511479	160	10543	10476	0.601875	161		156	9857	458
2019-03-21					10474	10381.2	0.576496	162	8472	8031.4	0.504618	161	10354	10523	0.604576	162		157	9792	458
2019-03-22					10310	10405.8	0.577862	163	8472	8294	0.521117	162	10618	10590.8	0.608471	163		158	9748	458
2019-03-23					10246	10442.8	0.579917	164	8613	8624.5	0.541883	163	10477	10614.6	0.609838	164		159	9756	458
2019-03-24					10728	10473.2	0.581605	165	8613	8720.6	0.547921	164	10962	10687.6	0.614032	165		160	9668	458
2019-03-25					10456	10560.8	0.58647	166	8952.5	8988.6	0.56476	165	10662	10630.8	0.610769	166		161	9641	458
2019-03-26					10626	10741	0.596477	167	8952.5	9228.4	0.579826	166	10719	10650.8	0.611918	167		162	9733	458
2019-03-27					10748	10869.6	0.603619	168	9812	9524.6	0.598437	167	10334	10515.2	0.604127	168		163	9874	458
2019-03-28					11147	11024.2	0.612204	169	9812	9746.1	0.612354	168	10577	10451.4	0.600462	169		164	9926	458
2019-03-29					11371	11080.4	0.615325	170	10094	10055.2	0.631775	169	10284	10436.8	0.599623	170		165	10050	458
2019-03-30					11229	11118.6	0.617446	171	10060	10212.4	0.641652	170	10343	10566.8	0.607092	171		166	10140	458
2019-03-31					10907	11096	0.616191	172	10498	10381.4	0.65227	171	10646	10622.2	0.610275	172		167	10305	458
2019-04-01					10939	11081.8	0.615403	173	10598	10416.8	0.654494	172	10984	10788.8	0.619846	173		168	10377	458
2019-04-02					11034	11166.4	0.620101	174	10657	10448	0.656455	173	10854	10887.6	0.625523	174		169	10510	458
2019-04-03					11300	11120.4	0.617546	175	10271	10529.6	0.661582	174	11117	10931.6	0.628051	175		170	10577	458
2019-04-04					11652	10908.8	0.605795	176	10216	10581.2	0.664824	175	10837	10818	0.621524	176		171	10689	458
2019-04-05					10677	10795.6	0.599509	177	10906	10677	0.670843	176	10866	10772.6	0.618916	177		172	10712	458
2019-04-06					9881	10580.2	0.587547	178	10856	10844.4	0.681361	177	10416	10638	0.611183	178		173	10773	458
2019-04-07					10468	10317.8	0.572976	179	11136	10979.6	0.689855	178	10627	10593.4	0.60862	179		174	10861	458
2019-04-08					10223	10096.2	0.56067	180	11108	10950.2	0.688008	179	10444	10664.4	0.612699	180		175	10878	458
2019-04-09					10340	10047	0.557937	181	10892	10955.6	0.688347	180	10614	10721.2	0.615963	181		176	10801	458
2019-04-10					9569	9993.4	0.554961	182	10759	10816	0.679576	181	11221	10894	0.625891	182		177	10804	458
2019-04-11					9635	9938.8	0.551929	183	10883	10791	0.678006	182	10700	11024.6	0.633394	183		178	10733	458
2019-04-12					10200	10012.6	0.556027	184	10438	10787.2	0.677767	183	11491	11023.6	0.633336	184		179	10620	458
2019-04-13					9950	10223	0.567711	185	10983	10836.6	0.680871	184	11097	10927.6	0.627821	185		180	10572	458
2019-04-14					10709	10356.8	0.575141	186	10873	10674.6	0.670692	185	10609	10842.4	0.622926	186		181	10528	458
2019-04-15					10621	10337.4	0.574064	187	11006	10586.2	0.665138	186	10741	10637	0.611125	187		182	10559	458
2019-04-16					10304	10524.8	0.584471	188	10073	10429.8	0.655311	187	10274	10393.2	0.597118	188		183	10584	458
2019-04-17					10103	10369.8	0.575863	189	9996	10332.4	0.649191	188	10464	10344.6	0.594326	189		184	10624	458
2019-04-18					10887	10248.4	0.569122	190	10201	10087	0.633773	189	9878	10303.6	0.59197	190		185	10608	458
2019-04-19					9934	10048.2	0.558004	191	10386	10034	0.630443	190	10366	10417.4	0.598509	191		186	10595	458
2019-04-20					10014	9878	0.548552	192	9779	9980.6	0.627088	191	10536	10316.6	0.592717	192		187	10468	458
2019-04-21					9303	9590.2	0.53257	193	9808	9903.8	0.622262	192	10843	10397	0.597336	193		188	10417	458
2019-04-22					9252	9526.8	0.529049	194	9729	9763.4	0.613441	193	9960	10413.6	0.59829	194		189	10267	458
2019-04-23					9448	9428.4	0.523585	195	9817	9768.2	0.613742	194	10280	10337.8	0.593935	195		190	10195	458
2019-04-24					9617	9505.4	0.527861	196	9684	9685.4	0.60854	195	10449	10186.2	0.585225	196		191	10149	458
2019-04-25					9522	9645	0.535613	197	9803	9524.6	0.598437	196	10157	10170.6	0.584329	197		192	10033	458
2019-04-26					9688	9696.2	0.538456	198	9394	9320.8	0.585632	197	10085	10005.6	0.574849	198		193	9917	458
2019-04-27					9950	9616.6	0.534036	199	8925	9202	0.578168	198	9882	9770.2	0.561325	199		194	9903	458
2019-04-28					9704	9696.4	0.538468	200	8798	9054	0.568869	199	9455	9543.4	0.548295	200		195	9817	458
2019-04-29					9219	9787.6	0.543532	201	9090	8978.4	0.564119	200	9272	9388.8	0.539413	201		196	9739	458
2019-04-30					9921	9803.4	0.54441	202	9063	9022.2	0.566871	201	9023	9185.2	0.527715	202		197	9712	458
2019-05-01					10144	9804	0.544443	203	9016	9152.6	0.575064	202	9312	8995.8	0.516834	203		198	9635	458
2019-05-02					10029	9838.2	0.546342	204	9144	9165.1	0.575849	203	8864	8885.4	0.510491	204		199	9480	458
2019-05-03					9707	9739.2	0.540844	205	9450	9183	0.576974	204	8508	8824.4	0.506986	205		200	9406	458
2019-05-04					9390	9694.2	0.538345	206	9152.5	9129.5	0.573612	205	8720	8698.6	0.499759	206		201	9400	458
2019-05-05					9426	9576.6	0.531815	207	9152.5	9050.4	0.568642	206	8718	8636	0.496162	207		202	9380	458
2019-05-06					9919	9150.6	0.508158	208	8748.5	8822.7	0.554336	207	8683	8726.2	0.501344	208		203	9322	458
2019-05-07					9441	8999.4	0.499761	209	8748.5	8654.5	0.543768	208	8551	8843.6	0.508089	209		204	9302	458
2019-05-08					7577	8747.4	0.485767	210	8311.5	8521.1	0.535386	209	8959	9084	0.521901	210		205	9231	458
2019-05-09					8634	8171.6	0.453791	211	8311.5	8468.5	0.532081	210	9307	8730	0.501563	211		206	9148	458
2019-05-10					8166	7671.2	0.426003	212	8485.5	8362.2	0.525402	211	9920	8708.6	0.500333	212		207	9012	458
2019-05-11					7040	7543.6	0.418917	213	8485.5	8343.3	0.524215	212	6913	7996	0.459392	213		208	8844	458
2019-05-12					6939	7226.1	0.401285	214	8217	8127.2	0.510637	213	8444	8101.2	0.465436	214		209	8788	458
2019-05-13					6939	7002.2	0.388851	215	8217	7876.3	0.494873	214	5396	7719.4	0.443501	215		210	8767	458
2019-05-14					7046.5	6965.4	0.386808	216	7231	7608	0.478016	215	9833	7829	0.449798	216		211	8421	458
2019-05-15					7046.5	6948.8	0.385886	217	7231	7393.4	0.464532	216	8011	7565.6	0.434665	217		212	8241	458
2019-05-16					6856	6718.7	0.373108	218	7144	7200.8	0.452431	217	7461	7659	0.440031	218		213	7889	458
2019-05-17					6856	6467.1	0.359136	219	7144	7205.4	0.45272	218	7127	6641.4	0.381567	219		214	7735	458
2019-05-18					5788.5	6002.1	0.333313	220	7254	6844.4	0.430038	219	5863	5978.2	0.343464	220		215	7443	458
2019-05-19					5788.5	5575.2	0.309606	221	7254	6500.8	0.408449	220	4745	5311	0.305132	221		216	7396	458
2019-05-20					4721.5	4613.5	0.2562	222	5426	6055.3	0.380458	221	4695	4710.6	0.270637	222		217	7238	458
2019-05-21					4721.5	3865.3	0.214651	223	5426	5587.8	0.351085	222	4125	3856.4	0.221561	223		218	7194	458
2019-05-22					2047.5	3063.5	0.170125	224	4916.5	5057.7	0.317779	223	4125	3225.8	0.185331	224		219	6651	458
2019-05-23					2047.5	2475.1	0.137449	225	4916.5	4893.2	0.307443	224	1592	2588.9	0.148739	225		220	6160	458
2019-05-24					1779.5	1913.5	0.106262	226	4603.5	4481.8	0.281594	225	1592	2066	0.118697	226		221	5647	458
2019-05-25					1779.5	1868.83	0.103781	227	4603.5	4172.3	0.262148	226	1510.5	1551.25	0.0891236	227		222	4971	458
2019-05-26									3369	3986.25	0.250459	227	1510.5	1537.67	0.0883432	228		223	4260	458
2019-05-27									3369	3780.5	0.237531	228						224	2864	561
2019-05-28																		225	2251	561
2019-05-29																		226	1709	561
2019-05-30
2019-05-31

## Sheet: vol by date
Means by date
Term	Fitted Mean	SE Mean
day
24	2237	944	0.0475002
25	1172	667
26	1314	667
27	1157	545
28	1341	545
29	1741	545
30	1894	545
31	2381	545
32	2607	545
33	3047	545
34	2465	667
35	3538	545
36	3538	545
37	4467	545
38	4642	545
39	5273	545
40	5587	545
41	6094	545
42	6231	545
43	6852	545
44	7147	545
45	7658	545
46	7960	545
47	8252	545
48	8464	545
49	8848	545
50	8921	545
51	9483	545
52	9765	545
53	10149	545
54	10125	545
55	10538	545
56	10885	545
57	10489	545
58	11140	545
59	11208	545
60	11430	545
61	11492	545
62	11822	545
63	11826	545
64	12117	545
65	12360	545
66	12361	545
67	12272	545
68	12922	545
69	12640	545
70	13093	545
71	13268	545
72	13743	545
73	13463	545
74	13854	545
75	13592	545
76	14103	545
77	14256	545
78	14296	545
79	14404	545
80	14653	545
81	15111	545
82	15323	667
83	15140	545
84	15422	545
85	15403	545
86	15734	545
87	16048	545
88	15554	545
89	16017	545
90	15774	545
91	15583	545
92	15953	545
93	15827	545
94	16141	545
95	16150	545
96	16382	545
97	16287	545
98	16676	545
99	16824	545
100	16702	545
101	16635	545
102	17096	545
103	17289	545
104	17376	545
105	17010	545
106	15850	545
107	16662	545
108	16390	545
109	16398	545
110	16741	545
111	16646	545
112	16271	545
113	16291	545
114	16158	545
115	16072	545
116	15825	545
117	16207	545
118	16251	545
119	16398	545
120	16148	545
121	16388	545
122	16104	545
123	16232	545
124	16142	545
125	16200	545
126	15622	545
127	15709	545
128	15508	545
129	16026	545
130	15780	545
131	16312	545
132	15965	545
133	16186	545
134	15387	545
135	15689	545
136	15481	545
137	15229	545
138	15397	545
139	15203	545
140	14766	545
141	15267	545
142	15318	545
143	15177	545
144	15028	545
145	14835	545
146	15131	545
147	15221	545
148	15167	545
149	14630	667
150	13555	545
151	14881	545
152	14505	545
153	14760	545
154	14434	545
155	14426	545
156	14074	545
157	14031	545
158	13896	545
159	13623	545
160	13548	545
161	14430	545
162	13946	944
163	14056	545
164	14324	545
165	13962	545
166	13948	545
167	13786	545
168	14150	545
169	13905	545
170	13831	545
171	13792	545
172	13991	545
173	14135	545
174	13983	545
175	13880	545
176	13956	545
177	13898	545
178	14439	545
179	13909	545
180	13841	545
181	13773	545
182	13879	545
183	13437	545
184	13528	545
185	13516	545
186	13635	545
187	13603	545
188	13598	545
189	14160	545
190	13450	545
191	13445	545
192	13046	545
193	13276	545
194	13068	545
195	13502	545
196	13672	545
197	13320	545
198	13526	545
199	13006	545
200	13060	545
201	12955	545
202	13231	545
203	12803	545
204	13030	545
205	12675	545
206	12550	545
207	12405	545
208	12332	545
209	12372	545
210	12289	545
211	12261	545
212	12352	545
213	12480	545
214	12074	545
215	12362	545
216	11991	545
217	12191	545
218	12084	545
219	12024	545
220	11199	545
221	11944	545
222	11600	545
223	11535	545
224	11641	545
225	11356	545
226	11411	545
227	11133	545
228	10815	545
229	10713	545
230	10674	545
231	10586	545
232	10283	545
233	10158	545
234	9855	545
235	10040	545
236	9533	545
237	9755	545
238	9506	545
239	9545	545
240	9807	545
241	9630	545
242	10136	545
243	9847	545
244	9765	545
245	9709	545
246	9843	545
247	9618	545
248	9691	545
249	9536	545
250	9650	545
251	9374	545
252	9503	545
253	9273	545
254	9399	545
255	9514	545
256	9644	545
257	9678	545
258	9633	545
259	9800	545
260	9930	545
261	9991	545
262	9446	545
263	9483	545
264	9699	545
265	9855	545
266	9800	545
267	9940	545
268	10114	545
269	10042	545
270	10257	545
271	10379	545
272	10508	545
273	10591	545
274	10791	545
275	10830	545
276	10817	545
277	10807	545
278	10784	545
279	11141	545
280	10650	545
281	10548	545
282	10673	545
283	10576	545
284	10773	545
285	10384	545
286	10521	545
287	10760	545
288	10477	545
289	10819	545
290	10323	545
291	10255	545
292	10061	545
293	10546	545
294	10083	545
295	10222	545
296	9664	545
297	9783	545
298	9860	545
299	9859	545
300	9667	545
301	9498	545
302	9401	545
303	9355	545
304	9102	545
305	9416	545
306	9384	545
307	9329	545
308	9193	545
309	9087	545
310	8953	545
311	9073	545
312	8904	545
313	8398	545
314	9013	545
315	7855	545
316	7900	545
317	6851	545
318	8001	545
319	7429	545
320	7217	545
321	7042	545
322	6658	545
323	5929	545
324	5303	545
325	4758	545
326	4588	545
327	1597	667
328	1597	667
329	1423	667
330	2220	545
331	3814	944
Year
1	11698.9	54.7
2	11177.4	54.3
3	11990.2	54.4

## Sheet: MS per cow per day
Date	Nikau 78305 2021/22 KgMS/Cow		Nikau 78305 2020/21 KgMS/Cow		Nikau78305 2019/20 KgMS/Cow		Nikau78305 2018/19 KgMS/Cow		Means
2018-07-24			0.08		0.3				Term	Fitted Mean
2018-07-25	0.15		0.08		0.3				Year
2018-07-26	0.15		0.13		0.34				2018	1.7619
2018-07-27	0.22		0.13		0.34		0.1		2019	1.7227
2018-07-28	0.22		0.28		0.44		0.1		2020	1.6724
2018-07-29	0.35		0.28		0.44		0.17		Days from Peak
2018-07-30	0.35		0.45		0.51		0.17		-80	0.127
2018-07-31	0.35		0.45		0.51		0.23		-79	0.127
2018-08-01	0.58		0.61		0.62		0.23		-78	0.177
2018-08-02	0.58		0.61		0.62		0.28		-77	0.177
2018-08-03	0.65		0.75		1.02		0.28		-76	0.327
2018-08-04	0.7		0.75		0.65		0.33		-75	0.327
2018-08-05	0.7		0.87		0.65		0.33		-74	0.497
2018-08-06	0.79		0.87		0.91		0.41		-73	0.497
2018-08-07	0.79		1.02		0.97		0.41		-72	0.657
2018-08-08	0.86		1.02		0.97		0.53		-71	0.657
2018-08-09	0.86		1.18		1.09		0.53		-70	0.797
2018-08-10	0.93		1.18		1.09		0.61		-69	0.797
2018-08-11	0.93		1.29		1.14		0.61		-68	0.917
2018-08-12	0.99		1.29		1.14		0.74		-67	0.917
2018-08-13	0.99		1.41		1.29		0.74		-66	1.067
2018-08-14	1.02		1.41		1.29		0.86		-65	0.562
2018-08-15	1.06		1.42		1.43		0.86		-64	0.642
2018-08-16	1.11		1.45		1.43		0.96		-63	0.55
2018-08-17	1.14		1.56		1.47		0.96		-62	0.587
2018-08-18	1.17		1.51		1.46		1.09		-61	0.62
2018-08-19	1.18		1.59		1.54		1.09		-60	0.665
2018-08-20	1.18		1.58		1.58		1.19		-59	0.71
2018-08-21	1.22		1.6		1.55		1.21		-58	0.713
2018-08-22	1.22		1.57		1.69		1.29		-57	0.763
2018-08-23	1.23		1.63		1.68		1.37		-56	0.805
2018-08-24	1.23		1.71		1.75		1.38		-55	0.847
2018-08-25	1.24		1.66		1.82		1.39		-54	0.873
2018-08-26	1.27		1.7		1.74		1.37		-53	1.043
2018-08-27	1.27		1.69		1.81		1.42		-52	0.927
2018-08-28	1.26		1.76		1.88		1.45		-51	0.943
2018-08-29	1.31		1.81		1.89		1.44		-50	1.05
2018-08-30	1.34		1.74		1.86		1.48		-49	1.14
2018-08-31	1.41		1.8		1.9		1.55		-48	1.123
2018-09-01	1.43		1.79		1.88		1.56		-47	1.217
2018-09-02	1.42		1.87		1.89		1.64		-46	1.213
2018-09-03	1.38		1.86		1.88		1.67		-45	1.287
2018-09-04	1.41		1.9		1.92		1.7		-44	1.303
2018-09-05	1.4		2.03		1.93		1.6		-43	1.373
2018-09-06	1.43		2.02		1.96		1.7		-42	1.393
2018-09-07	1.48		2.05		1.95		1.67		-41	1.47
2018-09-08	1.52		2.12		1.93		1.77		-40	1.503
2018-09-09	1.51		2.13		2.02		1.75		-39	1.54
2018-09-10	1.5		2.18		2.09		1.89		-38	1.577
2018-09-11	1.5		2.14		2.04		1.73		-37	1.65
2018-09-12	1.45		2.1		2.02		1.84		-36	1.663
2018-09-13	1.51		2.1		2.07		1.82		-35	1.657
2018-09-14	1.51		2.21		2.07		1.9		-34	1.743
2018-09-15	1.57		2.15		2.16		1.89		-33	1.753
2018-09-16	1.67		2.18		2.12		1.92		-32	1.79
2018-09-17	1.49		2.22		2.13		1.95		-31	1.813
2018-09-18	1.64		2.26		2.16		1.99		-30	1.797
2018-09-19	1.62		2.3		2.15		2.11		-29	1.823
2018-09-20	1.65		2.29		2.23		1.64		-28	1.91
2018-09-21	1.66		2.34		2.22		2.14		-27	1.903
2018-09-22	1.73		2.36		2.31		3.12		-26	1.913
2018-09-23	1.7		2.32		2.29		2.13		-25	1.907
2018-09-24	1.725		2.36		2.37		2.27		-24	1.947
2018-09-25	1.75		2.42		2.51		2.25		-23	1.953
2018-09-26	1.71		2.28		2.36		2.25		-22	1.98
2018-09-27	1.71		2.27		2.38		2.31		-21	2.003
2018-09-28	1.73		2.38		2.32		2.35		-20	2.06
2018-09-29	1.8		2.46		2.28		2.37		-19	2.003
2018-09-30	1.805		2.4		2.25		2.58		-18	2.05
2018-10-01	1.81		2.33		2.31		2.22		-17	2.057
2018-10-02	1.82		2.32		2.35		2.45		-16	2.067
2018-10-03	1.91		2.37		2.41		2.39		-15	2.083
2018-10-04	1.62		2.53		2.36		2.51		-14	2.113
2018-10-05	1.77		2.49		2.24		2.4		-13	2.143
2018-10-06	1.81		2.52		2.35		2.45		-12	2.153
2018-10-07	1.75		2.54		2.39		2.48		-11	2.17
2018-10-08	1.76		2.52		2.2		2.56		-10	2.367
2018-10-09	1.71		2.63		2.3		2.41		-9	2.21
2018-10-10	1.77		2.6		2.32		2.54		-8	2.577
2018-10-11	1.76		2.69		2.35		2.54		-7	2.26
2018-10-12	1.75		2.74		2.34		2.56		-6	2.313
2018-10-13	1.87		2.43		2.22		2.56		-5	2.34
2018-10-14	1.95		2.59		2.28		2.48		-4	2.33
2018-10-15	1.75		2.51		2.37		2.63		-3	2.417
2018-10-16	1.89		2.57		2.29		2.46		-2	2.413
2018-10-17	1.84		2.52		2.26		2.48		-1	2.477
2018-10-18	1.86		2.57		2.26		2.51		0	2.61
2018-10-19	1.85		2.59		2.25		2.6		1	2.337
2018-10-20	1.77		2.56		2.3		2.4		2	2.473
2018-10-21	1.79		2.49		2.27		2.46		3	2.407
2018-10-22	1.8		2.43		2.3		2.4		4	2.453
2018-10-23	1.82		2.43		2.34		2.39		5	2.39
2018-10-24	1.85		2.51		2.3		2.3		6	2.443
2018-10-25	1.84		2.45		2.37		2.37		7	2.473
2018-10-26	1.83		2.44		2.35		2.4		8	2.51
2018-10-27	1.82		2.39		2.34		2.39		9	2.42
2018-10-28	1.83		2.43		2.31		2.43		10	2.403
2018-10-29	1.81		2.35		2.4		2.41		11	2.44
2018-10-30	1.97		2.37		2.4		2.45		12	2.487
2018-10-31	1.63		2.38		2.37		2.43		13	2.403
2018-11-01	1.8		2.46		2.45		2.39		14	2.407
2018-11-02	1.73		2.38		2.4		2.42		15	2.447
2018-11-03	1.84		2.47		2.21		2.39		16	2.413
2018-11-04	1.84		2.22		2.23		2.35		17	2.39
2018-11-05	1.84		2.45		2.33		2.44		18	2.367
2018-11-06	1.79		2.38		2.3		2.35		19	2.42
2018-11-07	1.85		2.44		2.22		2.41		20	2.41
2018-11-08	1.76		2.32		2.3		2.46		21	2.377
2018-11-09	1.71		2.41		2.29		2.39		22	2.377
2018-11-10	1.73		2.28		2.28		2.47		23	2.29
2018-11-11	1.57		2.3		2.32		2.35		24	2.333
2018-11-12	1.72		2.24		2.26		2.44		25	2.35
2018-11-13	1.75		2.22		2.29		2.36		26	2.37
2018-11-14	1.72		2.23		2.3		2.32		27	2.337
2018-11-15	1.75		2.16		2.25		2.35		28	2.393
2018-11-16	1.73		2.08		2.31		2.36		29	2.33
2018-11-17	1.69		2.18		2.24		2.28		30	2.373
2018-11-18	1.71		2.21		2.19		2.53		31	2.34
2018-11-19	1.75		2.24		2.31		2.41		32	2.317
2018-11-20	1.74		2.26		2.2		2.43		33	2.32
2018-11-21	1.68		2.27		2.21		2.32		34	2.317
2018-11-22	1.73		2.3		2.23		2.28		35	2.277
2018-11-23	1.74		2.31		2.21		2.36		36	2.33
2018-11-24			2.3		2.23		2.33		37	2.337
2018-11-25			2.83		2.15		2.32		38	2.35
2018-11-26			1.76		1.97		2.33		39	2.31
2018-11-27			2.29		2.07		2.27		40	2.297
2018-11-28			2.27		2.11		2.3		41	2.367
2018-11-29			2.39		2.01		2.26		42	2.32
2018-11-30			2.34		2.05		2.24		43	2.32
2018-12-01			2.31		2.02		2.2		44	2.296
2018-12-02			2.26		2.01		2.27		45	2.282
2018-12-03			2.19		2		2.16		46	2.307
2018-12-04			2.19		2.02		2.13		47	2.317
2018-12-05			2.2		1.96		2.18		48	2.31
2018-12-06			2.1		1.96		2.16		49	2.387
2018-12-07			2.34		1.91		2.23		50	2.34
2018-12-08			2.29		2.04		2.16		51	2.313
2018-12-09			2.26		2.09		1.26		52	2.273
2018-12-10			2.3		2		2.17		53	2.237
2018-12-11			2.23		1.98		2.21		54	2.25
2018-12-12			2.24		1.98		2.18		55	2.247
2018-12-13			2.24		1.98		2.19		56	2.287
2018-12-14			2.29		2.01		2.11		57	2.277
2018-12-15			2.18		2.03		2.12		58	2.253
2018-12-16			2.19		2.06		2.13		59	2.27
2018-12-17			2.24		2		2.05		60	2.24
2018-12-18			2.27		2.01		2.05		61	2.21
2018-12-19			2.25		2.03		2.06		62	2.137
2018-12-20			2.21		2.06		2.1		63	2.21
2018-12-21			2.2		2.03		2.16		64	2.15
2018-12-22			2.13		1.99		2.18		65	2.11
2018-12-23			2.18		2.03		2.18		66	2.157
2018-12-24			2.25		1.96		2.18		67	2.15
2018-12-25			2.19		2.07		2.28		68	2.163
2018-12-26			2.17		2.01		2.22		69	2.123
2018-12-27			2.16		1.99		2.22		71	2.087
2018-12-28			2.13		1.96		2.26		72	2.117
2018-12-29			2.19		2.02		2.23		73	2.113
2018-12-30			2.08		2.02		2.07		74	2.14
2018-12-31			2.03		2.04		2.13		75	2.123
2019-01-01			2.09		1.95		2.21		76	2.093
2019-01-02			2.1		1.97		2.18		77	2.08
2019-01-03			2.16		1.98		2.12		78	2.073
2019-01-04			2.3		1.98		2.1		79	2.037
2019-01-05			2		2.05		2.13		80	2.033
2019-01-06			1.61		2.1		2.09		81	2.073
2019-01-07			1.58		2.01		2.02		82	2.107
2019-01-08			1.62		2.02		1.93		83	2.113
2019-01-09			1.63		2.01		2		84	2.163
2019-01-10			1.61		2.02		1.9		85	2.07
2019-01-11			1.7		2.11		1.98		86	1.983
2019-01-12			1.66		2.01		2.01		87	1.943
2019-01-13			1.66		2.03		2.02		88	1.943
2019-01-14			1.6		2.1		2		89	1.973
2019-01-15			1.55		1.97		2.02		90	1.933
2019-01-16			1.54		2.01		2		91	1.947
2019-01-17			1.53		2.05		1.93		92	1.933
2019-01-18			1.5		2.06		2.05		93	1.953
2019-01-19			1.58		2.04		1.98		94	1.913
2019-01-20			1.6		2.04		1.92		95	1.897
2019-01-21			1.53		1.97		1.89		96	1.887
2019-01-22			1.58		1.94		1.93		97	1.9
2019-01-23			1.59		1.79		1.95		98	1.847
2019-01-24			1.57		1.84		1.88		99	1.857
2019-01-25			1.57		1.82		1.89		100	1.837
2019-01-26			1.6		1.8		1.88		101	1.837
2019-01-27			1.57		1.79		1.88		102	1.843
2019-01-28			1.54		1.77		1.96		103	1.89
2019-01-29			1.51		1.79		1.92		104	1.863
2019-01-30			1.52		1.79		1.83		105	1.87
2019-01-31			1.57		1.85		1.88		106	1.87
2019-02-01			1.57		1.73		1.81		107	1.87
2019-02-02			1.51		1.77		1.82		108	1.883
2019-02-03			1.54		1.77		1.89		109	1.817
2019-02-04			1.46		1.73		1.89		110	1.867
2019-02-05			1.47		1.51		1.87		111	1.883
2019-02-06			1.44		1.79		1.98		112	1.82
2019-02-07			1.46		1.74		1.94		113	1.803
2019-02-08			1.44		1.61		2		114	1.84
2019-02-09			1.48		1.69		1.97		115	1.823
2019-02-10			1.45		1.57		1.89		116	1.797
2019-02-11			1.43		1.64		1.94		117	1.79
2019-02-12			1.37		1.63		1.87		118	1.77
2019-02-13			1.39		1.61		1.87		119	1.753
2019-02-14			1.41		1.54		1.86		120	1.743
2019-02-15			1.38		1.54		1.86		121	1.737
2019-02-16			1.39		1.54		1.85		122	1.693
2019-02-17			1.36		1.48		1.86		123	1.683
2019-02-18			1.24		1.43		1.79		124	1.663
2019-02-19			1.32		1.4		1.82		125	1.667
2019-02-20			1.29		1.4		1.8		126	1.687
2019-02-21			1.25		1.34		1.64		127	1.69
2019-02-22			1.29		1.34		1.79		128	1.693
2019-02-23			1.32		1.24		1.76		129	1.65
2019-02-24			1.28		1.24		1.74		130	1.677
2019-02-25			1.19		1.5		1.79		131	1.687
2019-02-26			1.39		1.5		1.73		132	1.65
2019-02-27			1.2		1.52		1.71		133	1.563
2019-02-28			1.25		1.52		1.82		134	1.683
2019-03-01			1.23		1.5		1.78		135	1.63
2019-03-02			1.27		1.5		1.86		136	1.557
2019-03-03			1.21		1.49		1.9		137	1.647
2019-03-04			1.28		1.49		1.8		138	1.543
2019-03-05			1.21		1.48		1.81		139	1.58
2019-03-06			1.26		1.48		1.81		140	1.573
2019-03-07			1.23		1.48		1.82		141	1.557
2019-03-08			1.27		1.48		1.83		142	1.523
2019-03-09			1.27		1.47		1.71		143	1.54
2019-03-10			1.26		1.47		1.7		144	1.463
2019-03-11			1.29		1.49		1.76		145	1.51
2019-03-12			1.31		1.49		1.73		146	1.473
2019-03-13			1.28		1.46		1.82		147	1.47
2019-03-14			1.31		1.46		1.81		148	1.487
2019-03-15			1.33		1.49		1.74		149	1.443
2019-03-16			1.35		1.49		1.76		150	1.447
2019-03-17			1.38		1.65		1.68		151	1.567
2019-03-18			1.38		1.65		1.67		152	1.532
2019-03-19			1.43		1.42		1.7		153	1.557
2019-03-20			1.39		1.42		1.73		154	1.577
2019-03-21			1.44		1.54		1.66		155	1.557
2019-03-22			1.39		1.54		1.73		156	1.57
2019-03-23			1.38		1.55		1.72		157	1.563
2019-03-24			1.43		1.55		1.76		158	1.583
2019-03-25			1.42		1.62		1.74		159	1.57
2019-03-26			1.38		1.62		1.73		160	1.547
2019-03-27			1.44		1.72		1.73		161	1.523
2019-03-28			1.47		1.72		1.76		162	1.54
2019-03-29			1.51		1.76		1.72		163	1.547
2019-03-30			1.48		1.76		1.71		164	1.573
2019-03-31			1.43		1.8		1.74		165	1.553
2019-04-01			1.44		1.84		1.82		166	1.55
2019-04-02			1.46		1.84		1.84		167	1.573
2019-04-03			1.5		1.78		1.83		168	1.56
2019-04-04			1.55		1.82		1.85		169	1.537
2019-04-05			1.41		1.91		1.83		170	1.53
2019-04-06			1.34		1.9		1.76		171	1.553
2019-04-07			1.4		1.95		1.82		172	1.537
2019-04-08			1.44		1.89		1.85		173	1.627
2019-04-09			1.39		1.86		1.85		174	1.64
2019-04-10			1.29		1.84		1.91		175	1.53
2019-04-11			1.33		1.87		1.85		176	1.5
2019-04-12			1.36		1.86		1.97		177	1.557
2019-04-13			1.34		1.88		1.86		178	1.57
2019-04-14			1.4		1.86		1.94		179	1.567
2019-04-15			1.43		1.87		1.89		180	1.52
2019-04-16			1.39		1.79		1.85		181	1.553
2019-04-17			1.34		1.7		1.84		182	1.573
2019-04-18			1.44		1.69		1.77		183	1.627
2019-04-19			1.35		1.73		1.86		184	1.653
2019-04-20			1.37		1.63		1.85		185	1.673
2019-04-21			1.22		1.74		1.91		186	1.667
2019-04-22			1.25		1.67		1.77		187	1.657
2019-04-23			1.33		1.69		1.86		188	1.68
2019-04-24			1.32		1.69		1.85		189	1.67
2019-04-25			1.28		1.68		1.79		190	1.667
2019-04-26			1.31		1.6		1.81		191	1.63
2019-04-27			1.31		1.51		1.77		192	1.69
2019-04-28			1.33		1.6		1.71		193	1.693
2019-04-29			1.28		1.61		1.7		194	1.747
2019-04-30			1.32		1.56		1.69		195	1.677
2019-05-01			1.34		1.56		1.71		196	1.703
2019-05-02			1.34		1.6		1.65		197	1.68
2019-05-03			1.35		1.65		1.57		198	1.683
2019-05-04			1.32		1.58		1.59		199	1.66
2019-05-05			1.29		1.58		1.57		200	1.657
2019-05-06			1.37		1.52		1.57		201	1.687
2019-05-07			1.34		1.52		1.59		202	1.687
2019-05-08			1.03		1.49		1.61		203	1.683
2019-05-09			1.3		1.49		1.68		204	1.597
2019-05-10			1.08		1.48		1.84		205	1.613
2019-05-11			0.98		1.48		1.26		206	1.65
2019-05-12			1.04		1.44		1.49		207	1.587
2019-05-13			1.04		1.44		0.99		208	1.527
2019-05-14			1.01		1.29		1.79		209	1.58
2019-05-15			1.01		1.29		1.42		210	1.493
2019-05-16			0.99		1.24		1.33		211	1.457
2019-05-17			0.99		1.24		1.32		212	1.47
2019-05-18			0.89		1.25		1.06		213	1.45
2019-05-19			0.89		1.25		0.97		214	1.39
2019-05-20			0.74		1.01		0.93		215	1.393
2019-05-21			0.74		1.01		0.84		216	1.397
2019-05-22			0.31		0.99		0.84		217	1.373
2019-05-23			0.31		0.99		0.31		218	1.34
2019-05-24			0.28		0.93		0.31		219	1.36
2019-05-25			0.28		0.93		0.27		220	1.607
2019-05-26					0.67		0.27		221	1.607
2019-05-27					0.67				222	1.576
2019-05-28									223	1.367
2019-05-29									224	1.482
2019-05-30									225	1.217
2019-05-31									226	1.617
2020-05-31									227	1.427
Average	1.52		1.71		1.8		1.88		228	1.382
									229	1.357
									230	1.227
									231	1.107
									232	1.087
									233	1.017
									234	1.017
									235	1.246
									236	1.246
									237	0.617
									238	0.617
									239	0.986
									240	0.986
									241	0.926
									242	0.926
									243	0.666
									244	0.666

## Sheet: MP per cow per day
Date	Nikau 78305 2021/22 Protein (kg)	Cows	Milk Protein/ cow/day	Nikau 78305 2020/21 Protein (kg)	Cows	Milk Protein/ cow/day	Nikau 78305 2019/20 Protein (kg)	Cows	Milk Protein/ cow/day	Nikau 78305 2018/19 Protein (kg)	Cows	Milk Protein/ cow/day		Means
2018-07-24				21.45	568.125	0.0377558	77.6	572.333	0.135585					Term	Fitted Mean
2018-07-25	40.3	571	0.0705779	21.45	568.125	0.0377558	77.6	572.333	0.135585					Year
2018-07-26	40.3	571	0.0705779	36.45	580.769	0.0627616	91.4	582.941	0.156791					2018	0.81125
2018-07-27	73.85	744.091	0.0992486	36.45	580.769	0.0627616	91.4	582.941	0.156791	25.7	579	0.0443869		2019	0.79469
2018-07-28	73.85	744.091	0.0992486	73.35	565	0.129823	115.9	572.159	0.202566	25.7	579	0.0443869		2020	0.78078
2018-07-29	119.6	737.286	0.162217	73.35	565	0.129823	115.9	572.159	0.202566	41.1	565.882	0.0726299		Days from Peak
2018-07-30	119.6	737.286	0.162217	119.25	569.222	0.209496	131.75	570.588	0.230902	41.1	565.882	0.0726299		-65	0.24632
2018-07-31	121.8	744.571	0.163584	119.25	569.222	0.209496	131.75	570.588	0.230902	56.2	571.739	0.0982966		-64	0.28285
2018-08-01	195.35	739.741	0.264079	160.7	573.115	0.280398	163	572.581	0.284676	56.2	571.739	0.0982966		-63	0.24347
2018-08-02	195.35	739.741	0.264079	160.7	573.115	0.280398	163	572.581	0.284676	68	571.607	0.118963		-62	0.26164
2018-08-03	219	740.308	0.295823	195.5	575.4	0.339764	261.9	576.569	0.454239	68	571.607	0.118963		-61	0.27726
2018-08-04	234.3	748.714	0.312936	195.5	575.4	0.339764	168.9	572.385	0.295081	79.3	570.909	0.138901		-60	0.29229
2018-08-05	234.3	748.714	0.312936	222.45	577.931	0.384908	168.9	572.385	0.295081	79.3	570.909	0.138901		-59	0.31444
2018-08-06	268.3	743.671	0.360778	222.45	577.931	0.384908	234.2	573.516	0.408358	96.4	577.683	0.166874		-58	0.31689
2018-08-07	268.3	743.671	0.360778	259.35	577.451	0.449129	248.6	574.948	0.432387	96.4	577.683	0.166874		-57	0.34013
2018-08-08	282.25	741.279	0.380761	259.35	577.451	0.449129	248.6	574.948	0.432387	127.45	571.792	0.222896		-56	0.35102
2018-08-09	282.25	741.279	0.380761	301.45	577.288	0.522183	281	576.56	0.487374	127.45	571.792	0.222896		-55	0.36964
2018-08-10	309.55	747.849	0.41392	301.45	577.288	0.522183	281	576.56	0.487374	147.9	571.967	0.258581		-54	0.38445
2018-08-11	309.55	747.849	0.41392	330.35	572.829	0.576699	293.2	576.053	0.508981	147.9	571.967	0.258581		-53	0.45448
2018-08-12	335.3	743.03	0.45126	330.35	572.829	0.576699	293.2	576.053	0.508981	184	574.324	0.320376		-52	0.40624
2018-08-13	335.3	743.03	0.45126	357.95	575.674	0.621793	333.3	576.512	0.578132	184	574.324	0.320376		-51	0.41125
2018-08-14	339.8	745.294	0.455927	357.95	575.674	0.621793	333.3	576.512	0.578132	217.85	576.163	0.378105		-50	0.46125
2018-08-15	350.5	746.792	0.469341	361.1	573.944	0.629156	364.25	576.993	0.63129	217.85	576.163	0.378105		-49	0.49464
2018-08-16	377.4	746.937	0.505264	373.4	573.931	0.650601	364.25	576.993	0.63129	237.8	572.552	0.415333		-48	0.48861
2018-08-17	384.3	748.158	0.513662	392.7	574.744	0.683261	374.1	573.129	0.652732	237.8	572.552	0.415333		-47	0.53566
2018-08-18	382	742.393	0.514552	378.8	576.225	0.657382	363.5	576.712	0.630297	268.7	576.743	0.465892		-46	0.52817
2018-08-19	385.7	744.576	0.518013	404.3	576.101	0.701787	386.1	574.156	0.672466	268.7	576.743	0.465892		-45	0.56119			574.887
2018-08-20	393.3	747.966	0.525826	394.5	574.81	0.686314	397.5	575.38	0.690848	294.2	572.941	0.513491		-44	0.56649
2018-08-21	409.7	745.82	0.549328	402	573.688	0.70073	420.6	575.871	0.730372	303.3	575.041	0.52744		-43	0.60104
2018-08-22	406.9	743.115	0.54756	391.6	575.796	0.680102	437.1	576.331	0.758418	324.3	573.876	0.565105		-42	0.60698
2018-08-23	409.5	745.772	0.549095	412.1	574.908	0.71681	427.5	575.536	0.742786	336.8	573.358	0.587417		-41	0.64614
2018-08-24	407.5	742.52	0.548807	420.6	575.263	0.731144	447.1	576.629	0.775369	341	575.435	0.592595		-40	0.66478
2018-08-25	413.5	742.984	0.55654	411	576.386	0.713064	469.4	575.989	0.814946	343.1	575.108	0.596584		-39	0.67751
2018-08-26	425.8	744.724	0.571755	426.5	575.176	0.741512	437.1	573.621	0.762002	333.5	576.204	0.578788		-38	0.67917
2018-08-27	424.8	745.433	0.56987	413.8	575.503	0.719023	463.1	575.028	0.805353	352.2	575.07	0.612447		-37	0.72251
2018-08-28	422.8	743.254	0.56885	437.3	575.966	0.759246	476.9	573.723	0.831237	362.2	574.621	0.630329		-36	0.72062
2018-08-29	422.5	745.344	0.566853	446.8	576.409	0.775144	473.7	574.55	0.824471	370.9	575	0.645043		-35	0.73884
2018-08-30	423.5	747.313	0.566697	435.7	573.966	0.759105	474.8	576.237	0.823967	369.7	574.797	0.643183		-34	0.76096
2018-08-31	448.2	747.163	0.599869	447.8	576.389	0.776906	485.1	573.789	0.845432	388.7	576.516	0.674222		-33	0.76793
2018-09-01	453.1	746.014	0.607361	456.1	574.693	0.793641	473	573.564	0.824668	392.3	574.038	0.683404		-32	0.78911
2018-09-02	448.1	747.113	0.599776	481.3	575.989	0.835606	477	573.862	0.83121	413.7	575.976	0.71826		-31	0.80347
2018-09-03	439.6	745.942	0.589322	468.5	575.054	0.814706	475.4	576.33	0.824875	409.4	574.731	0.712334		-30	0.79171
2018-09-04	451.6	743.759	0.607186	470.7	574.158	0.819809	480	575.521	0.834027	419.9	576.294	0.728621		-29	0.80885
2018-09-05	453.2	745.643	0.607798	518.5	574.532	0.902474	481.7	575.13	0.83755	383.4	573.375	0.668672		-28	0.84216
2018-09-06	458.6	747.063	0.613871	502.4	574.554	0.874417	492.8	574.031	0.858491	419.3	576.412	0.727431		-27	0.83546
2018-09-07	471.9	744.865	0.633538	520.6	573.756	0.907354	487.8	574.923	0.848461	416.3	574.85	0.724189		-26	0.85146
2018-09-08	488.1	744.671	0.655457	524.5	575.094	0.912024	479.7	574.301	0.835277	445.6	573.446	0.777056		-25	0.83713
2018-09-09	479.7	745.894	0.643121	536.2	576.15	0.93066	507.8	573.713	0.885112	443.7	574.8	0.771921		-24	0.85947
2018-09-10	472.6	744.333	0.634931	545.7	576.284	0.946928	528.4	575.359	0.918383	484.2	576.402	0.840039		-23	0.8582
2018-09-11	479.6	746.6	0.642379	548.4	575.888	0.952269	519.5	576.324	0.901403	451.1	576.185	0.782908		-22	0.87413
2018-09-12	448.7	746.828	0.600808	540.5	575.667	0.938911	520	574.109	0.905751	481.3	575.761	0.835937		-21	0.88289
2018-09-13	480.9	744.57	0.645877	538.2	573.905	0.937786	514.3	574.155	0.895752	466.7	575.934	0.810336		-20	0.90891
2018-09-14	481.4	744.503	0.646606	562.1	575.339	0.976989	542.4	573.913	0.945091	487.8	574.158	0.849592		-19	0.88592
2018-09-15	508.1	744.459	0.682509	558.7	576.233	0.969574	557.2	574.63	0.969668	488.6	575.503	0.848997		-18	0.90639
2018-09-16	537.5	747.126	0.719424	576.4	575.367	1.0018	542.6	574.292	0.944815	490.9	575.417	0.853121		-17	0.89388
2018-09-17	472.3	746.98	0.632279	574.7	576.261	0.997291	538.2	574.366	0.937033	499.3	574	0.869861		-16	0.92243
2018-09-18	514.2	744.39	0.690767	589.9	574.779	1.02631	562.6	575.926	0.976862	510.3	576.131	0.885737		-15	0.92187
2018-09-19	512.6	744.198	0.688796	586.8	575.739	1.01921	554.7	573.907	0.966533	531.3	574.739	0.924419		-14	0.91892
2018-09-20	534.6	743.939	0.718607	585.9	574.148	1.02047	577.9	576.278	1.00281	412.2	574.939	0.716946		-13	0.93929
2018-09-21	531	742.892	0.714775	600.1	575.513	1.04272	572.5	574.55	0.996433	549.2	575.047	0.955053		-12	0.93891
2018-09-22	561.5	742.89	0.755832	604.1	575.805	1.04914	603.2	575.974	1.04727	776	575.673	1.34799		-11	0.97194
2018-09-23	549.6	744.235	0.738476	585.1	575.69	1.01635	599.8	575.415	1.04238	529.9	575.869	0.920175		-10	1.07868
2018-09-24	764.3	1064.81	0.71778	596	575.975	1.03477	615.1	575.148	1.06946	569.4	574.009	0.991971		-9	0.9945
2018-09-25	573.3	746.057	0.76844	596.4	575.661	1.03603	641.4	575.657	1.1142	577.3	574.978	1.00404		-8	1.16449
2018-09-26	557.4	745.556	0.74763	592.6	573.904	1.03258	595.9	575.847	1.03482	566.7	575.156	0.985299		-7	1.01088
2018-09-27	566.7	746.257	0.75939	573.7	574.714	0.998236	602.1	575.294	1.0466	600.4	574.762	1.04461		-6	1.03511
2018-09-28	574.9	743.064	0.773689	575.9	574.622	1.00222	605.8	576.121	1.05152	618	575.489	1.07387		-5	1.05069
2018-09-29	587.5	745.889	0.787651	598.2	573.943	1.04226	583.6	574.912	1.01511	622	574.599	1.08249		-4	1.0435
2018-09-30	357.9	433.906	0.824833	595.3	575.042	1.03523	587.9	574.533	1.02327	697	575.078	1.21201		-3	1.09298
2018-10-01	586	744.365	0.787249	602.9	576.223	1.0463	595.6	575.758	1.03446	572.8	574.685	0.99672		-2	1.10153
2018-10-02	601.1	743.956	0.807978	611.6	574.871	1.06389	606.6	575.064	1.05484	649.9	575.959	1.12838		-1	1.13
2018-10-03	639.3	743.613	0.859722	623.7	575.57	1.08362	622.6	575.519	1.08181	643.4	574.435	1.12006		0	1.19103
2018-10-04	553.5	745.432	0.742522	660.1	574.15	1.1497	607.6	574.915	1.05685	662.6	574.741	1.15287		1	1.04897
2018-10-05	577.3	743.785	0.776165	653.4	575.382	1.13559	593.1	575.312	1.03092	628.5	575.875	1.09138		2	1.11365
2018-10-06	596.2	745.249	0.800001	658.7	574.365	1.14683	635.9	576.128	1.10375	651.4	574.204	1.13444		3	1.09474
2018-10-07	579.3	745.486	0.777077	659.4	575.787	1.14521	624.8	574.31	1.08791	653.1	575.484	1.13487		4	1.10091
2018-10-08	586.3	744.886	0.7871	659.4	574.008	1.14876	572.7	575.136	0.995764	678.7	574.258	1.18187		5	1.08048
2018-10-09	543.8	743.684	0.731224	683.4	575.703	1.18707	606.8	575.783	1.05387	637.4	575.851	1.10688		6	1.10763
2018-10-10	579.5	744.011	0.778886	682.7	574.5	1.18834	616.2	574.526	1.07254	663.7	575.197	1.15387		7	1.11701
2018-10-11	588.8	745.455	0.789854	711.3	574.535	1.23804	634.8	575.234	1.10355	675.2	574.173	1.17595		8	1.14288
2018-10-12	584.6	744.229	0.785511	717.5	575.438	1.24688	626.7	576.154	1.08773	680.5	574.18	1.18517		9	1.08728
2018-10-13	608.1	745.027	0.816212	640.8	574.527	1.11535	589.8	575.405	1.02502	668.3	574.922	1.16242		10	1.094
2018-10-14	634.1	743.282	0.853108	669.7	574.363	1.16599	576.4	575.088	1.00228	628.5	574.073	1.09481		11	1.12388
2018-10-15	586.1	747.086	0.784515	639.4	574.661	1.11266	601.2	574.388	1.04668	640.5	575.171	1.11358		12	1.135
2018-10-16	618	745.079	0.829442	652.6	575.097	1.13476	583.8	574.934	1.01542	641.3	574.878	1.11554		13	1.08407
2018-10-17	619.4	746.848	0.829352	648.4	575.437	1.1268	578.8	574.027	1.00832	657.4	576.089	1.14114		14	1.08299
2018-10-18	614.5	746.989	0.822636	663.3	574.786	1.15399	601.2	575.796	1.04412	667.1	576.056	1.15805		15	1.07894
2018-10-19	602.2	745.459	0.807824	668.5	575.637	1.16132	605.2	575.067	1.0524	657.2	574.731	1.14349		16	1.09516
2018-10-20	572.4	744.52	0.768818	668.8	574.102	1.16495	596.5	573.826	1.03951	630.8	574.583	1.09784		17	1.08521
2018-10-21	593.9	746.704	0.795362	631.7	575.261	1.09811	585.7	573.877	1.0206	651.2	575.528	1.13148		18	1.07976
2018-10-22	594.6	743.222	0.80003	631.2	575.267	1.09723	599.4	575.435	1.04165	643.4	574.542	1.11985		19	1.06255
2018-10-23	607.7	743.681	0.817151	628.2	575.309	1.09194	597.6	574.658	1.03992	629.9	574.017	1.09735		20	1.08058
2018-10-24	631.7	745.946	0.846844	651.1	575.219	1.13192	583.6	574.435	1.01596	604.3	574.913	1.05112		21	1.06411
2018-10-25	619.9	743.641	0.833601	630.2	576.041	1.09402	606.3	574.008	1.05626	591.8	575.485	1.02835		22	1.06919
2018-10-26	601.3	743.169	0.809102	632.3	574.672	1.10028	597.1	575.617	1.03732	632.1	575.625	1.09811		23	1.04458
2018-10-27	611	745.055	0.820074	604	574.854	1.0507	605.9	575.256	1.05327	627.8	574.937	1.09195		24	1.05091
2018-10-28	625	746.23	0.837544	612.1	573.992	1.06639	595.8	575.671	1.03497	630.3	575.103	1.09598		25	1.04261
2018-10-29	591.9	743.978	0.795588	589.8	574.426	1.02676	618.5	574.083	1.07737	637.4	575.602	1.10736		26	1.06557
2018-10-30	639.9	745.533	0.858312	606.5	574.219	1.05622	620.3	575.042	1.0787	637.3	574.816	1.1087		27	1.06197
2018-10-31	541.4	744.724	0.726981	599.7	575.588	1.04189	601.1	573.966	1.04727	639	574.486	1.1123		28	1.07486
2018-11-01	607.4	744.889	0.815424	630.5	574.634	1.09722	630.9	575.388	1.09648	619.7	575.188	1.07739		29	1.03446
2018-11-02	580.8	746.647	0.777877	600.5	574.412	1.04542	628.3	574.75	1.09317	617.8	576.074	1.07243		30	1.06683
2018-11-03	627.1	745.435	0.841254	619.5	573.927	1.07941	578	574.615	1.00589	627.4	576.025	1.08919		31	1.04918
2018-11-04	622.6	744.565	0.836193	570.6	575.045	0.99227	581.5	575.157	1.01103	602.4	575.362	1.04699		32	1.03875
2018-11-05	631.6	743.913	0.849024	604.3	575.959	1.04921	587.2	574.077	1.02286	626.5	574.918	1.08972		33	1.03946
2018-11-06	614.9	743.575	0.82695	609.7	575.21	1.05996	597.7	575.913	1.03783	614.5	575.66	1.06747		34	1.04133
2018-11-07	631.2	743.73	0.848695	619.5	574.672	1.07801	568.4	575.721	0.987284	611.7	575.394	1.0631		35	1.01345
2018-11-08	593.9	743.58	0.798704	606.3	576.164	1.0523	585.7	573.826	1.02069	652.8	576.016	1.1333		36	1.03529
2018-11-09	580	743.392	0.780208	625.7	574.73	1.08868	589.5	574.847	1.02549	630.8	575.063	1.09692		37	1.04628
2018-11-10	599.1	743.873	0.80538	564.7	576.184	0.980069	591.9	574.737	1.02986	637.8	575.789	1.1077		38	1.04867
2018-11-11	533.5	746.688	0.714489	596.2	575.739	1.03554	594.3	574.741	1.03403	615.5	574.596	1.07119		39	1.05042
2018-11-12	577.9	744.884	0.775826	574.6	575.804	0.99791	578.8	574.292	1.00785	639.4	573.975	1.11399		40	1.04051
2018-11-13	601.2	744.343	0.807692	566	574.279	0.985583	579.4	574.803	1.008	633.3	575.847	1.09977		41	1.05152
2018-11-14	599	745.64	0.803337	581.7	575.381	1.01098	592.5	575.696	1.02919	594.6	574.957	1.03416		42	1.04719
2018-11-15	597.5	745.143	0.80186	549.6	574.028	0.957445	586	576.133	1.01713	609.4	573.915	1.06183		43	1.04522
2018-11-16	583	746.936	0.780522	525.4	574.423	0.914657	598.1	575.065	1.04006	615.6	575.466	1.06974		44	1.05283
2018-11-17	563.4	743.136	0.758138	556.7	574.587	0.96887	579.7	576.027	1.00638	590	574.342	1.02726		45	1.02243
2018-11-18	569	745.497	0.763249	561.6	576.063	0.974893	576.2	575.023	1.00205	638.7	575.02	1.11074		46	1.04095
2018-11-19	585.7	745.314	0.785843	569.1	575	0.989739	580.5	574.026	1.01128	639.8	575.477	1.11177		47	1.04489
2018-11-20	590.9	746.207	0.791872	581.8	574.867	1.01206	542.9	575	0.944174	647.3	574.074	1.12755		48	1.03966
2018-11-21	567.6	743.631	0.763282	582.3	574.493	1.01359	548.3	574.072	0.955106	614.4	575.302	1.06796		49	1.05824
2018-11-22	593.7	744.855	0.797067	590	576.174	1.024	560.1	574.305	0.975266	598.7	574.825	1.04154		50	1.05828
2018-11-23	594.4	743.621	0.799332	592.8	574.113	1.03255	557	573.801	0.97072	619.5	574.746	1.07787		51	1.0416
2018-11-24	585.5			594.6	574.826	1.0344	561.4	575.516	0.975473	615.4	574.936	1.07038		52	1.02656
2018-11-25	552.6			718.4	574.488	1.25051	545.5	575.023	0.948657	609.2	575.517	1.05853		53	1.00719
2018-11-26	591.5			453.8	576.136	0.787661	507.7	575.838	0.881672	614.9	573.906	1.07143		54	1.01312
2018-11-27	567.1			593.2	575.284	1.03114	524.5	574.396	0.913133	595.3	575.771	1.03392		55	1.00446
2018-11-28	578.8			593.2	575.419	1.0309	535.1	574.834	0.930877	599.4	574.304	1.0437		56	1.01885
2018-11-29	576.6			622.2	574.059	1.08386	512.2	574.677	0.891284	598.2	574.159	1.04187		57	1.02271
2018-11-30	556.4			607.6	575.385	1.05599	517.1	575.805	0.898047	596.1	575.67	1.03549		58	1.01091
2018-12-01	507			594.9	575.411	1.03387	521.4	575.446	0.906081	576.9	574.273	1.00457		59	1.02264
2018-12-02	518.5			564	575.442	0.980115	515.6	575.622	0.895727	585.6	574.802	1.01879		60	1.00692
2018-12-03	512.9			559	575.297	0.971672	512.3	575.5	0.890182	574	575.556	0.997297		61	0.99692
2018-12-04	685.6			560.9	576.073	0.973661	514.6	573.861	0.896732	549.5	575.822	0.954289		62	0.9641
2018-12-05	501.4			552.9	576.273	0.959442	490.3	574.388	0.853605	557.3	575.688	0.968059		63	0.99181
2018-12-06				534.8	574	0.931707	493.8	573.724	0.860692	552.6	575.602	0.960039		64	0.97077
2018-12-07				606.5	575.513	1.05384	478.1	576.44	0.829401	573	574.888	0.996716		65	0.94306
2018-12-08				599.3	575.371	1.04159	514.8	574.51	0.896068	560.4	575.926	0.973042		66	0.95434
2018-12-09				589	575.442	1.02356	523.8	574.928	0.91107	343.5	575.159	0.597226		67	0.96236
2018-12-10				605.3	574.565	1.05349	499.5	573.7	0.870664	556.7	575.899	0.966663		68	0.96932
2018-12-11				576.5	574.529	1.00343	492.4	574.04	0.857779	568.8	575.068	0.989101		69	0.95346
2018-12-12				578.8	575	1.00661	502.3	575.202	0.873258	567	575.78	0.984751		70	0.89761
2018-12-13				577.9	574.42	1.00606	503.3	575.051	0.875227	570	573.836	0.993316		71	0.9256
2018-12-14				600.9	575.852	1.0435	513.5	576.418	0.890847	545.4	575.071	0.948404		72	0.94241
2018-12-15				564.7	573.807	0.984128	521.2	574.581	0.907095	545.5	573.962	0.950411		73	0.94332
2018-12-16				565.2	574.612	0.98362	523.9	574.466	0.911977	549.4	574.883	0.955673		74	0.96465
2018-12-17				572.6	574.375	0.99691	511	574.75	0.889082	539.4	576.049	0.936379		75	0.95554
2018-12-18				586.9	574.846	1.02097	511.2	576.318	0.88701	523.1	573.951	0.911401		76	0.93819
2018-12-19				583.9	574.978	1.01552	514.4	576.256	0.892659	529.2	574.175	0.921671		77	0.92797
2018-12-20				572.8	574.434	0.997155	525.5	575.874	0.912526	549	575.381	0.95415		78	0.93078
2018-12-21				568.2	573.955	0.989974	512.4	573.695	0.893158	560	575.324	0.973364		79	0.90834
2018-12-22				548.9	573.85	0.956522	495.8	574.171	0.863506	569.7	574.541	0.991574		80	0.91244
2018-12-23				562.3	575.275	0.977445	505.8	574.828	0.879916	580.4	574.817	1.00971		81	0.94731
2018-12-24				583.7	574.622	1.0158	489.2	573.673	0.85275	584.3	574.862	1.01642		82	0.9563
2018-12-25				577.1	574.475	1.00457	520.3	574.01	0.906431	599.1	573.991	1.04374		83	0.95883
2018-12-26				580.2	576.083	1.00715	515.6	575.721	0.895572	566.1	574.414	0.985525		84	0.99075
2018-12-27				571.3	575.046	0.993485	505	574.472	0.879068	567.5	574.054	0.988583		85	0.92965
2018-12-28				557.8	574.789	0.970444	498.9	574.592	0.868269	588.4	574.469	1.02425		86	0.893
2018-12-29				564.8	574.749	0.98269	510.3	574.01	0.889009	579.6	574.574	1.00875		87	0.85978
2018-12-30				538.8	574.183	0.938377	506.3	573.911	0.882193	538	575.604	0.934671		88	0.85515
2018-12-31				532.7	576.01	0.924811	520.1	575.245	0.904136	551.8	575.07	0.959535		89	0.87688
2019-01-01				564.8	575.933	0.98067	498.4	575.231	0.866435	575.7	574.661	1.00181		90	0.85978
2019-01-02				565.4	574.857	0.983549	491.8	575.33	0.854814	570.5	573.716	0.994395		91	0.86988
2019-01-03				573.8	576.204	0.995828	498.4	574.798	0.867087	547.5	575.566	0.951238		92	0.86545
2019-01-04				619.5	576	1.07552	503.8	573.939	0.877793	534.5	575	0.929565		93	0.87675
2019-01-05				506.1	575.2	0.879868	518.3	574.78	0.901736	542.8	575.493	0.943191		94	0.86259
2019-01-06				550.3	761.429	0.72272	540.2	574.952	0.939556	536.5	575.359	0.932462		95	0.84479
2019-01-07				531	757.848	0.700668	516.8	575.622	0.897812	513.4	576.04	0.891258		96	0.82991
2019-01-08				542.2	760.062	0.713363	521.1	576.287	0.904237	482.4	575.803	0.837786		97	0.84157
2019-01-09				551.4	759.018	0.726465	516.3	574.577	0.898574	505.2	575.3	0.878151		98	0.82187
2019-01-10				546.5	761.304	0.717847	512.5	573.861	0.893073	480.8	575.474	0.835486		99	0.81832
2019-01-11				582.6	758.059	0.768542	543.3	575.355	0.944286	501.3	576.162	0.870068		100	0.80926
2019-01-12				564.1	761.024	0.741238	519.9	574.925	0.904291	512	574.527	0.891167		101	0.81185
2019-01-13				568.3	758.373	0.749367	516.1	574.433	0.89845	493.8	573.812	0.860561		102	0.8132
2019-01-14				550.3	758.937	0.725093	527.3	574.095	0.918489	493.9	573.6	0.861053		103	0.84071
2019-01-15				526.9	759.097	0.694114	500.7	573.756	0.87267	479.5	573.812	0.83564		104	0.83123
2019-01-16				513.9	757.987	0.67798	509.5	574.677	0.886586	495.6	575.85	0.860641		105	0.8254
2019-01-17				515.6	761.176	0.677372	520.8	574.732	0.906162	477.2	574.508	0.830624		106	0.82317
2019-01-18				508	761.933	0.666725	518.4	574.854	0.901794	499.1	575.073	0.86789		107	0.80994
2019-01-19				540.2	762.025	0.7089	521	574.461	0.906937	472.8	576.263	0.820459		108	0.83171
2019-01-20				549.6	760.25	0.72292	524.3	574.314	0.912916	462.1	575.208	0.803361		109	0.80271
2019-01-21				516.6	760.131	0.67962	508.8	574.213	0.886082	438.5	576.085	0.761173		110	0.81146
2019-01-22				534.3	760.696	0.702383	491.1	574.948	0.854164	462.4	574.611	0.804718		111	0.8107
2019-01-23				539.9	757.736	0.712517	460	575.642	0.799107	462.9	576.103	0.803503		112	0.79147
2019-01-24				537.2	762.293	0.704716	462.8	573.641	0.806776	443	576.117	0.768941		113	0.77401
2019-01-25				540.7	760.064	0.711388	461.1	575	0.801913	448.6	576.085	0.778705		114	0.79746
2019-01-26				538.8	759	0.709881	452.9	576.278	0.785906	446.3	576.277	0.774454		115	0.78184
2019-01-27				533.2	760.51	0.701109	457	576.369	0.792895	443	576.489	0.768444		116	0.77156
2019-01-28				525	760.649	0.6902	445.9	573.503	0.777503	468.3	575.459	0.813785		117	0.77131
2019-01-29				511.6	759.934	0.673217	446.4	573.855	0.777897	462.1	576.146	0.802054		118	0.76467
2019-01-30				508.6	761.316	0.668054	445	575.866	0.772749	433.3	576.011	0.752243		119	0.74893
2019-01-31				527.2	760.573	0.693161	459.1	575.297	0.798022	454.1	575.957	0.788426		120	0.75807
2019-02-01				529.3	757.898	0.698379	427.7	573.699	0.745512	447.9	574.751	0.779293		121	0.74536
2019-02-02				514.1	762.45	0.674273	434.3	575.48	0.754674	455.6	575.33	0.791894		122	0.72586
2019-02-03				517	758.636	0.681486	425.7	575.65	0.739512	475.8	574.18	0.82866		123	0.72273
2019-02-04				487.5	761.438	0.640236	415.6	574.162	0.723838	463.9	575.132	0.806597		124	0.71848
2019-02-05				485.1	759.388	0.638804	355.8	576.225	0.617467	457.4	575.027	0.795441		125	0.71868
2019-02-06				474.2	762.014	0.622298	424.7	576.145	0.737141	486.6	574.04	0.847676		126	0.7295
2019-02-07				481	759.315	0.633466	421.5	574.828	0.733263	468.2	574.33	0.815211		127	0.71783
2019-02-08				474.5	760.208	0.624171	391	575.342	0.679596	480.2	576.15	0.833464		128	0.71509
2019-02-09				502.2	759.392	0.661319	406.8	573.669	0.70912	482.1	575.482	0.837732		129	0.70026
2019-02-10				478.1	762.207	0.627258	371.4	573.758	0.647311	463.3	574.286	0.806741		130	0.70267
2019-02-11				475.1	762.098	0.623411	387.1	573.537	0.674935	477.3	574.278	0.83113		131	0.70118
2019-02-12				449.9	757.591	0.593856	384.9	576.748	0.667362	454.1	574.545	0.790364		132	0.69235
2019-02-13				443.7	760.719	0.583264	375.1	574.845	0.652524	449.3	575.508	0.780702		133	0.65279
2019-02-14				445.8	759.929	0.586634	357.2	575.065	0.621147	438.8	573.71	0.764847		134	0.70561
2019-02-15				440.8	757.464	0.581942	355.4	574.091	0.619066	437.4	574.785	0.76098		135	0.68395
2019-02-16				436.4	760.072	0.574156	351.2	574.74	0.611059	437.4	576.486	0.758734		136	0.65002
2019-02-17				419.5	760.221	0.551814	335.5	574.932	0.583547	439.5	574.032	0.765636		137	0.68566
2019-02-18				384.7	757.903	0.507585	330.6	573.147	0.576816	435.3	574.525	0.757669		138	0.63452
2019-02-19				408.4	758.939	0.538119	327.35	576.036	0.568281	434.8	576.264	0.754516		139	0.65047
2019-02-20				403.3	760.155	0.53055	327.35	576.036	0.568281	436.6	573.944	0.760701		140	0.64495
2019-02-21				392.8	762	0.515486	312.25	573.284	0.544669	396.4	575.122	0.689245		141	0.6462
2019-02-22				406.7	761.395	0.534151	312.25	573.284	0.544669	436.2	575.419	0.758056		142	0.62498
2019-02-23				416.9	760	0.548553	285.6	575.524	0.496243	425.9	576.193	0.739162		143	0.63673
2019-02-24				402.8	762.578	0.528208	285.6	575.524	0.496243	426.8	576.149	0.74078		144	0.60004
2019-02-25				372.3	760.168	0.48976	339.55	573.4	0.59217	417.8	573.575	0.728413		145	0.62118
2019-02-26				444.6	762.59	0.583013	339.55	573.4	0.59217	427.5	575.78	0.742471		146	0.61032
2019-02-27				375.7	758.583	0.495265	345.25	573.717	0.601777	422.3	573.567	0.736269		147	0.61453
2019-02-28				394.6	762.16	0.517739	345.25	573.717	0.601777	450.8	573.571	0.785953		148	0.60633
2019-03-01				381.4	760	0.501842	347.95	574.967	0.605166	427.4	573.708	0.744978		149	0.60197
2019-03-02				401	758.898	0.528398	347.95	574.967	0.605166	437.3	574.462	0.761234		150	0.60589
2019-03-03				378.3	757.686	0.499283	351.85	576.275	0.610559	439.9	575.684	0.764134		151	0.67802
2019-03-04				402.7	759.219	0.530414	351.85	576.275	0.610559	432.4	574.5	0.752654		152	0.65836
2019-03-05				381.4	763.058	0.499831	352.2	576.757	0.610656	428.4	575.359	0.744578		153	0.63641
2019-03-06				397.7	761.984	0.521927	352.2	576.757	0.610656	426.2	575.138	0.741039		154	0.64487
2019-03-07				392.8	762.764	0.514969	350.6	573.919	0.610888	437.9	575	0.761565		155	0.64674
2019-03-08				405.2	758.031	0.534542	350.6	573.919	0.610888	423.1	574.863	0.736001		156	0.64713
2019-03-09				398.1	762.205	0.522301	351	576.701	0.608635	427.4	575.848	0.74221		157	0.64686
2019-03-10				395	761.429	0.518762	351	576.701	0.608635	402.7	575.059	0.700276		158	0.66172
2019-03-11				407	758.295	0.536731	344.85	575.034	0.599704	420.1	575.341	0.730176		159	0.64891
2019-03-12				433.1	758.55	0.570958	344.85	575.034	0.599704	418.9	575.318	0.728119		160	0.65776
2019-03-13				436	761.406	0.572625	337.95	575.411	0.587319	443.5	574.451	0.772042		161	0.63677
2019-03-14				423.7	762.29	0.555825	337.95	575.411	0.587319	443.7	574.917	0.771763		162	0.64523
2019-03-15				439.2	759.474	0.578295	348.6	573.423	0.607928	431.2	576.379	0.748118		163	0.65295
2019-03-16				444.6	758.963	0.585799	348.6	573.423	0.607928	432.8	575.284	0.752324		164	0.66397
2019-03-17				453.6	762.319	0.595027	403	575.636	0.700095	401.5	574.702	0.698622		165	0.66452
2019-03-18				453.1	762.319	0.594371	403	575.636	0.700095	402.5	575.868	0.698945		166	0.66133
2019-03-19				468.7	757.902	0.618418	327.75	576.268	0.568746	417.5	573.647	0.727799		167	0.66927
2019-03-20				455	758.129	0.600161	327.75	576.268	0.568746	418.6	576.532	0.726066		168	0.65793
2019-03-21				470.3	757.917	0.620517	366.85	575.455	0.637496	411.1	575.12	0.714807		169	0.65035
2019-03-22				455.7	760.288	0.599378	366.85	575.455	0.637496	420.5	574.509	0.73193		170	0.6526
2019-03-23				451.8	759.493	0.594871	378.95	576.226	0.657641	417	575.64	0.724412		171	0.65218
2019-03-24				472	761.469	0.619855	378.95	576.226	0.657641	433	576.136	0.751558		172	0.65362
2019-03-25				463.2	760.634	0.608966	395.7	576.389	0.686516	424.3	575.345	0.737471		173	0.69868
2019-03-26				466.5	760.797	0.613173	395.7	576.389	0.686516	421.3	573.757	0.734283		174	0.70678
2019-03-27				476.1	759.028	0.62725	432.7	576.163	0.751003	415.4	575.838	0.721383		175	0.65665
2019-03-28				498.3	759.864	0.655775	432.7	576.163	0.751003	428.4	573.92	0.746445		176	0.63532
2019-03-29				511.7	757.55	0.675467	452.2	574.659	0.786901	413.4	573.953	0.720267		177	0.66458
2019-03-30				506.4	761.757	0.664779	450.7	574.432	0.784601	418.9	575.848	0.727449		178	0.65292
2019-03-31				489.7	761.958	0.642686	463	576.222	0.803509	435.4	574.483	0.757899		179	0.6718
2019-04-01				471.5	757.361	0.622556	473.7	573.641	0.825777	451.4	575.11	0.784893		180	0.65368
2019-04-02				486.6	762.534	0.638135	478.5	576.304	0.83029	450.4	576.304	0.781531		181	0.66915
2019-04-03				506.2	762.333	0.664014	457.1	576.461	0.792942	466.9	574.699	0.812425		182	0.6873
2019-04-04				527.8	758.516	0.695832	458.7	576.484	0.795686	461.7	574.703	0.803372		183	0.70942
2019-04-05				495.4	762.553	0.64966	475.5	576.126	0.825341	462.9	576.557	0.802869		184	0.72121
2019-04-06				455.5	759.478	0.599754	479.8	575.368	0.8339	441.6	573.466	0.770054		185	0.74507
2019-04-07				471.1	757.429	0.621973	495.6	575.077	0.861798	454.8	573.956	0.792395		186	0.73295
2019-04-08				457	761.806	0.599891	497.6	574.762	0.86575	449.1	575.297	0.78064		187	0.7347
2019-04-09				464.3	759.496	0.611326	492.3	573.871	0.857858	450	574.27	0.783603		188	0.74617
2019-04-10				442.1	758.14	0.583138	490.6	576.522	0.850965	484.7	575.707	0.841922		189	0.74066
2019-04-11				451.9	761.429	0.59349	497.4	574.439	0.865889	461.2	574.919	0.8022		190	0.72684
2019-04-12				468.2	758.235	0.617486	481.2	575.753	0.835776	501	575.127	0.871112		191	0.71102
2019-04-13				451.7	762.537	0.592364	493.1	573.67	0.859553	491.6	576.344	0.852963		192	0.74098
2019-04-14				480.8	761.857	0.631089	496.9	575.806	0.862964	479.5	574.742	0.834287		193	0.73416
2019-04-15				482.2	758.322	0.635878	501.9	574.439	0.873723	473.7	576.296	0.821973		194	0.76735
2019-04-16				463.7	759.065	0.610883	464.4	576.257	0.80589	463.4	576.486	0.803835		195	0.76135
2019-04-17				455.6	762.239	0.597713	445.8	575.059	0.775225	463.6	576.087	0.80474		196	0.75598
2019-04-18				488.8	760.556	0.642688	457	575.266	0.794415	443.5	574.237	0.772329		197	0.7548
2019-04-19				456	760.889	0.599299	473.6	576.358	0.821711	465.4	574.57	0.809997		198	0.75267
2019-04-20				459.6	757.226	0.606952	450.8	576.564	0.781873	467.8	575.189	0.813298		199	0.73587
2019-04-21				421.4	760.984	0.553757	449.2	574.943	0.781295	484.7	576.23	0.841157		200	0.73903
2019-04-22				422.8	760.88	0.555672	440.7	576.707	0.764167	450.2	574.52	0.783611		201	0.7589
2019-04-23				430.7	760.451	0.566374	448.6	573.905	0.781662	461.6	574.247	0.803835		202	0.76628
2019-04-24				433.7	762.045	0.569126	440.6	573.55	0.768198	468.1	574.973	0.814125		203	0.75209
2019-04-25				429.4	759.531	0.565349	445.1	575.357	0.773606	455.8	573.464	0.794819		204	0.71653
2019-04-26				436.9	758.779	0.575794	428.4	576.562	0.743024	449.8	575.028	0.782223		205	0.72713
2019-04-27				449.7	760.305	0.591473	410.6	574.57	0.714622	443.7	575.028	0.771614		206	0.75004
2019-04-28				446.4	758.797	0.5883	407.3	573.5	0.710201	430.2	575.614	0.747376		207	0.72454
2019-04-29				430.5	759.141	0.567089	414.5	575.342	0.720442	422.8	576.471	0.733429		208	0.68388
2019-04-30				446.4	762.803	0.58521	412.4	574.038	0.718419	415.1	573.432	0.723887		209	0.69326
2019-05-01				457.5	757.761	0.603752	415.6	575.641	0.721978	429.3	575.614	0.745812		210	0.67524
2019-05-02				464.3	758.881	0.611822	423.4	573.25	0.738596	409.5	573.758	0.713716		211	0.64824
2019-05-03				463	760	0.609211	437.5	574.424	0.761632	390.5	574.395	0.679846		212	0.64643
2019-05-04				448.8	759.697	0.590762	417.35	574.62	0.726306	395	574.717	0.687295		213	0.64354
2019-05-05				444	761.395	0.58314	417.35	574.62	0.726306	391.4	574.14	0.681715		214	0.62836
2019-05-06				465.2	757.299	0.614288	402.45	576.711	0.697837	390.7	574.076	0.680571		215	0.6156
2019-05-07				455.1	762.388	0.59694	402.45	576.711	0.697837	391.6	574.34	0.681827		216	0.61769
2019-05-08				371.3	760.68	0.488116	389	575.671	0.675733	403.2	576.522	0.699367		217	0.61515
2019-05-09				414.4	761.769	0.543997	389	575.671	0.675733	429.1	576.19	0.744719		218	0.59959
2019-05-10				378.9	762.87	0.496677	391.2	575.068	0.680268	455.3	574.185	0.79295		219	0.60555
2019-05-11				335.8	757.857	0.443091	391.2	575.068	0.680268	318	576.667	0.551445		220	0.7231
2019-05-12				335.15	758.606	0.441797	379.65	574.062	0.661339	381.7	576.913	0.661625		221	0.72812
2019-05-13				335.15	758.606	0.441797	379.65	574.062	0.661339	250.4	573.434	0.436667		222	0.72718
2019-05-14				346.7	759.059	0.456749	331.9	575.116	0.577101	451.3	574.022	0.786206		223	0.61724
2019-05-15				346.7	759.059	0.456749	331.9	575.116	0.577101	363.7	574.859	0.632677		224	0.67233
2019-05-16				338	758.99	0.445329	320.75	576.129	0.556733	343.2	574.962	0.596909		225	0.5488
2019-05-17				338	758.99	0.445329	320.75	576.129	0.556733	331.4	573.409	0.577947		226	0.77053
2019-05-18				301	759.663	0.396228	328.6	575.68	0.570803	286.1	574.717	0.49781		227	0.64908
2019-05-19				301	759.663	0.396228	328.6	575.68	0.570803	253.9	577.32	0.439791		228	0.63119
2019-05-20				246.95	755.473	0.326881	266.95	576.98	0.462668	225.4	577.097	0.390576		229	0.61225
2019-05-21				246.95	755.473	0.326881	266.95	576.98	0.462668	213.25	576.012	0.370218		230	0.57218
2019-05-22				102.8	749.032	0.137244	252.7	573.586	0.440562	213.25	576.012	0.370218		231	0.50105
2019-05-23				102.8	749.032	0.137244	252.7	573.586	0.440562	79.1	574.516	0.137681		232	0.47644
2019-05-24				96.8	768.393	0.125977	233.85	574.194	0.407267	79.1	574.516	0.137681		233	0.45608
2019-05-25				96.8	768.393	0.125977	233.85	574.194	0.407267	68.45	567.963	0.120518		234	0.45608
2019-05-26							170.8	572.239	0.298477	68.45	567.963	0.120518		235	0.57168
2019-05-27							170.8	572.239	0.298477	70.35	567.963	0.123864		236	0.57168
2019-05-28										70.35	567.963	0.123864		237	0.46355
2019-05-29										63.25	567.963	0.111363		238	0.46355
2019-05-30										63.25	567.963	0.111363
2019-05-31										59.3	567.963	0.104408
Total	65404.7			147964			141620			140935

## Sheet: MUN
Date	Nikau 78305 2021/22 Milk Urea (3d avg)		Nikau 78305 2020/21 Milk Urea (3d avg)		Nikau 78305 2019/20 Milk Urea (3d avg)		Nikau 78305 2018/19 Milk Urea (3d avg)			Means
2018-07-24					19.7	-63				Term	Fitted Mean
2018-07-25					19.7	-62				Year
2018-07-26			22.2	-78	17	-61				2018	27.7766
2018-07-27	14.1	-68	22.2	-77	17	-60				2019	25.0666
2018-07-28	14.1	-67	21.3	-76	15.9	-59				2020	23.8719
2018-07-29	14.4	-66	21.3	-75	15.9	-58	17.7	-63		Days from Peak
2018-07-30	14.4	-65	16.1	-74	17.2	-57	17.7	-62		-78	23.8998
2018-07-31	16.7	-64	16.1	-73	17.2	-56	17.2	-61		-77	23.8998
2018-08-01	19.4	-63	14.3	-72	18.8	-55	17.2	-60		-76	22.9998
2018-08-02	19.4	-62	14.3	-71	18.8	-54	17.2	-59		-75	22.9998
2018-08-03	20.2	-61	14.5	-70	18.1	-53	17.2	-58		-74	17.7998
2018-08-04	16.1	-60	14.5	-69	17	-52	19	-57		-73	17.7998
2018-08-05	16.1	-59	17.5	-68	17	-51	19	-56		-72	15.9998
2018-08-06	11.7	-58	17.5	-67	17.7	-50	19.5	-55		-71	15.9998
2018-08-07	11.7	-57	18.4	-66	17.3	-49	19.5	-54		-70	16.1998
2018-08-08	11.5	-56	18.4	-65	17.3	-48	18.7	-53		-69	16.1998
2018-08-09	11.5	-55	16.5	-64	17.1	-47	18.7	-52		-68	19.1998
2018-08-10	13	-54	16.5	-63	17.1	-46	15.6	-51		-67	19.1998
2018-08-11	13	-53	14.2	-62	12.8	-45	15.6	-50		-66	20.0998
2018-08-12	13.9	-52	14.2	-61	12.8	-44	14.3	-49		-65	20.0998
2018-08-13	13.9	-51	14.6	-60	13.2	-43	14.3	-48		-64	18.1998
2018-08-14	12.3	-50	14.6	-59	13.2	-42	15.4	-47		-63	17.9667
2018-08-15	11.4	-49	14.6	-58	14.6	-41	15.4	-46		-62	17.2
2018-08-16	12.6	-48	15.3	-57	14.6	-40	17.3	-45		-61	16.1333
2018-08-17	11.5	-47	14.9	-56	18.1	-39	17.3	-44		-60	16.2667
2018-08-18	10.4	-46	14.3	-55	18.5	-38	18.9	-43		-59	15.9
2018-08-19	7.2	-45	14.8	-54	20.6	-37	18.9	-42		-58	15.9
2018-08-20	7.5	-44	14.9	-53	21.3	-36	18.7	-41		-57	17.1667
2018-08-21	7.2	-43	14.1	-52	21.2	-35	17.1	-40		-56	17.0333
2018-08-22	7.6	-42	12.6	-51	18.4	-34	19.8	-39		-55	17.5333
2018-08-23	6	-41	9.4	-50	17.5	-33	22.8	-38		-54	17.7
2018-08-24	5.7	-40	7.8	-49	19.1	-32	27.5	-37		-53	17.2333
2018-08-25	5.5	-39	7.8	-48	21.3	-31	29.2	-36		-52	16.6
2018-08-26	6.4	-38	9.4	-47	21.8	-30	28.3	-35		-51	15.0667
2018-08-27	7.1	-37	12.7	-46	21.2	-29	24.7	-34		-50	14.2333
2018-08-28	8.7	-36	14.4	-45	20.5	-28	20.6	-33		-49	13.1333
2018-08-29	10.4	-35	14.5	-44	20	-27	18.5	-32		-48	13.1333
2018-08-30	14.3	-34	12.1	-43	19.4	-26	21.1	-31		-47	13.9667
2018-08-31	17.4	-33	10.9	-42	19	-25	23.8	-30		-46	15.0667
2018-09-01	19.1	-32	11.7	-41	19.3	-24	27.6	-29		-45	14.8333
2018-09-02	16.4	-31	14.6	-40	20.6	-23	27.5	-28		-44	14.8667
2018-09-03	14.2	-30	13.5	-39	21.5	-22	28.3	-27		-43	14.7333
2018-09-04	12.4	-29	15.4	-38	22.7	-21	27.6	-26		-42	14.3333
2018-09-05	13.4	-28	16.5	-37	22.3	-20	28.7	-25		-41	15
2018-09-06	16.6	-27	20.5	-36	22.9	-19	27.5	-24		-40	15.4333
2018-09-07	16.6	-26	19.1	-35	22.4	-18	26.4	-23		-39	17.1333
2018-09-08	17	-25	19.8	-34	23.5	-17	24.2	-22		-38	18.9
2018-09-09	14.5	-24	18.8	-33	23.8	-16	23.3	-21		-37	21.5333
2018-09-10	13.7	-23	19.1	-32	23.6	-15	21.8	-20		-36	23.6667
2018-09-11	12.4	-22	15.5	-31	23.3	-14	21.3	-19		-35	22.8667
2018-09-12	11.7	-21	12.9	-30	24.4	-13	21.8	-18		-34	20.9667
2018-09-13	13.3	-20	11	-29	24.2	-12	21.3	-17		-33	18.9667
2018-09-14	14.9	-19	11	-28	22.5	-11	21	-16		-32	18.9
2018-09-15	17	-18	9.1	-27	22.6	-10	20.7	-15		-31	19.3
2018-09-16	18.5	-17	7.4	-26	23.3	-9	19.4	-14		-30	19.5
2018-09-17	19.7	-16	8.1	-25	22.7	-8	21.8	-13		-29	19.9333
2018-09-18	20.4	-15	8.2	-24	21.3	-7	23.9	-12		-28	19.6667
2018-09-19	19.7	-14	9.7	-23	20.1	-6	25.7	-11		-27	19.1333
2018-09-20	18.8	-13	9.6	-22	21.7	-5	26.3	-10		-26	18.1333
2018-09-21	18	-12	11	-21	21.6	-4	25.4	-9		-25	18.6
2018-09-22	17.6	-11	11.3	-20	23.6	-3	29.7	-8		-24	18.3333
2018-09-23	18.1	-10	13.4	-19	25.2	-2	29.3	-7		-23	18.9
2018-09-24	20.4	-9	16.8	-18	26.3	-1	29.2	-6		-22	18.4333
2018-09-25	24.1	-8	17.7	-17	28.2	0	27.2	-5		-21	19
2018-09-26	25.7	-7	20.9	-16	28.5	1	28.4	-4		-20	18.4667
2018-09-27	23.8	-6	24.6	-15	27.1	2	30.2	-3		-19	19.2
2018-09-28	23.5	-5	29.8	-14	25.2	3	30.1	-2		-18	20.3333
2018-09-29	24.3	-4	28.7	-13	21.5	4	30.7	-1		-17	20.8333
2018-09-30	23.9	-3	26	-12	19.8	5	30.6	0		-16	21.9
2018-10-01	19	-2	22.6	-11	21.2	6	32.5	1		-15	22.9667
2018-10-02	17.8	-1	23.5	-10	25.1	7	30.8	2		-14	24.1667
2018-10-03	18.8	0	24.8	-9	27.1	8	30	3		-13	24.9667
2018-10-04	21.4	1	27.5	-8	26.2	9	29.4	4		-12	24.7
2018-10-05	20	2	28.5	-7	24.5	10	29.1	5		-11	23.6
2018-10-06	19.2	3	27.6	-6	24.1	11	28.2	6		-10	24.1333
2018-10-07	19.3	4	24.8	-5	23.9	12	26.5	7		-9	24.5
2018-10-08	20.2	5	23.3	-4	24.8	13	28.1	8		-8	26.6333
2018-10-09	24.8	6	24.5	-3	24.2	14	30.2	9		-7	26.3667
2018-10-10	28.4	7	26.8	-2	23.2	15	32.7	10		-6	25.6333
2018-10-11	31.9	8	26.4	-1	24.4	16	32	11		-5	24.5667
2018-10-12	30.1	9	24.1	0	25	17	31.3	12		-4	24.4333
2018-10-13	27.8	10	23.2	1	27.1	18	29.1	13		-3	26.1
2018-10-14	27.7	11	24.1	2	27.9	19	26.9	14		-2	27.3667
2018-10-15	27.7	12	23.9	3	30.1	20	24.9	15		-1	27.8
2018-10-16	29.5	13	23.4	4	29.3	21	24.8	16		0	27.6333
2018-10-17	27.2	14	23	5	25.5	22	26.5	17		1	28.0667
2018-10-18	26.6	15	24	6	21.3	23	27.7	18		2	27.3333
2018-10-19	22.8	16	24.6	7	17.4	24	26.6	19		3	26.3667
2018-10-20	22.1	17	25.7	8	17.3	25	25.1	20		4	24.7667
2018-10-21	22	18	27.7	9	18.8	26	23.6	21		5	23.9667
2018-10-22	24.4	19	29.2	10	21.9	27	22.2	22		6	24.4667
2018-10-23	24.2	20	28.7	11	24	28	23.6	23		7	25.4
2018-10-24	25.7	21	28.3	12	24.2	29	25.4	24		8	26.9667
2018-10-25	22.8	22	26.4	13	24.2	30	29.1	25		9	28.0333
2018-10-26	23.9	23	25.9	14	22.7	31	29.9	26		10	28.8
2018-10-27	24	24	25.6	15	21.1	32	29.7	27		11	28.2667
2018-10-28	26.7	25	25.6	16	18.7	33	26.6	28		12	27.8333
2018-10-29	29.3	26	26.6	17	18.1	34	25.6	29		13	26.7667
2018-10-30	30.2	27	28	18	18.2	35	26.1	30		14	25.6667
2018-10-31	30.4	28	29.6	19	18.1	36	29.7	31		15	24.5667
2018-11-01	28.3	29	35.1	20	18.7	37	29.9	32		16	24.9333
2018-11-02	25.5	30	35.6	21	20	38	29.8	33		17	26.0333
2018-11-03	25.2	31	37.7	22	21.8	39	30	34		18	27.6
2018-11-04	23.6	32	34.7	23	20.2	40	31.1	35		19	28.0333
2018-11-05	22.6	33	36.7	24	18.4	41	34.4	36		20	30.1
2018-11-06	18.8	34	35.7	25	17.1	42	33.6	37		21	29.5
2018-11-07	18.3	35	35.2	26	16.7	43	33.1	38		22	28.4667
2018-11-08	19.7	36	33.6	27	16	44	29.9	39		23	26.5333
2018-11-09	19.7	37	32.9	28	16.1	45	28.8	40		24	26.5
2018-11-10	19.2	38	31.4	29	16.7	46	28.1	41		25	27.3667
2018-11-11	17.1	39	29.6	30	17.9	47	27.8	42		26	27.9667
2018-11-12	16.9	40	29	31	18.4	48	30.2	43		27	28.4
2018-11-13	15.8	41	28	32	19.5	49	32.4	44		28	27.8333
2018-11-14	18.4	42	26.5	33	20.6	50	34.4	45		29	27.0667
2018-11-15	21.8	43	24.5	34	20	51	35.8	46		30	26.6333
2018-11-16	26.1	44	23.6	35	20.1	52	35.7	47		31	27.1333
2018-11-17	28	45	23.5	36	18.5	53	35	48		32	26.3333
2018-11-18	26.2	46	25.5	37	21.6	54	32.5	49		33	25
2018-11-19	23	47	24.9	38	22.6	55	30.5	50		34	24.2
2018-11-20	19.4	48	23.4	39	26.4	56	27.4	51		35	24.3
2018-11-21	18.7	49	21.8	40	26.6	57	25.6	52		36	25.3333
2018-11-22	20.2	50	21.6	41	28	58	25.1	53		37	25.9333
2018-11-23	22.3	51	21.7	42	27	59	26.7	54		38	26
2018-11-24	22.4	52	21.8	43	25.7	60	26.3	55		39	25.0333
2018-11-25	22.8	53	22.4	44	24.3	61	25	56		40	23.6
2018-11-26	21.9	54	21.3	45	22.7	62	24.8	57		41	22.7
2018-11-27	21.6	55	22.5	46	22.3	63	27	58		42	22.2
2018-11-28	21.3	56	24.4	47	21.3	64	28.9	59		43	22.9
2018-11-29	21.2	57	27.2	48	23.4	65	30	60		44	23.6
2018-11-30	23.5	58	27.8	49	24	66	30.6	61		45	23.9333
2018-12-01	23.8	59	30.2	50	26.2	67	31.8	62		46	25
2018-12-02	24.7	60	30	51	24.4	68	34.2	63		47	26
2018-12-03			29.4	52	25.7	69	34	64		48	26.8667
2018-12-04			27.9	53	25	70	34.1	65		49	26.6
2018-12-05			28.4	54	27.5	71	33	66		50	27.1
2018-12-06			27.3	55	27.7	72	32.3	67		51	25.8
2018-12-07			24.8	56	28.8	73	32.1	68		52	25.0333
2018-12-08			23.4	57	28.5	74	30.6	69		53	23.8333
2018-12-09			24.3	58	29.9	75	29.6	70		54	25.5667
2018-12-10			25.1	59	30.2	76	27.9	71		55	25.4
2018-12-11			27.8	60	29.7	77	28.2	72		56	25.4
2018-12-12			29.8	61	30.5	78	28	73		57	24.9333
2018-12-13			32.9	62	31.6	79	29.6	74		58	26.4333
2018-12-14			33.8	63	33.1	80	28.5	75		59	27
2018-12-15			32.7	64	30.8	81	29.5	76		60	27.8333
2018-12-16			31.9	65	29.4	82	30	77		61	28.2333
2018-12-17			30.8	66	29.4	83	33	78		62	29.1333
2018-12-18			31.7	67	29.3	84	35.6	79		63	30.1
2018-12-19			28.5	68	30.9	85	36.5	80		64	29.3333
2018-12-20			26.3	69	31.4	86	36.3	81		65	29.8
2018-12-21			23.8	70	34.1	87	36.7	82		66	29.2667
2018-12-22			23.2	71	34.5	88	33.4	83		67	30.0667
2018-12-23			22.6	72	34.8	89	30.4	84		68	28.3333
2018-12-24			21.1	73	32.8	90	27.9	85		69	27.5333
2018-12-25			20.9	74	30.4	91	31	86		70	26.1333
2018-12-26			19.9	75	30.5	92	32.5	87		71	26.2
2018-12-27			20.3	76	31.1	93	33.4	88		72	26.1667
2018-12-28			18.9	77	32.7	94	33.2	89		73	25.9667
2018-12-29			16.8	78	29.8	95	33	90		74	26.3333
2018-12-30			15.9	79	29.3	96	31.6	91		75	26.1
2018-12-31			16.3	80	28.1	97	29.9	92		76	26.6667
2019-01-01			16.4	81	29.8	98	31.7	93		77	26.2
2019-01-02			16.6	82	29.1	99	33.6	94		78	26.7667
2019-01-03			17.4	83	29.2	100	34	95		79	27.7
2019-01-04			21.6	84	28.5	101	33	96		80	28.6333
2019-01-05			25.5	85	25.7	102	33.6	97		81	27.8333
2019-01-06			30.3	86	25.4	103	35	98		82	27.5667
2019-01-07			32.2	87	23.1	104	35.6	99		83	26.7333
2019-01-08			32.1	88	23.6	105	31.8	100		84	27.1
2019-01-09			29.3	89	22.1	106	28.7	101		85	28.1
2019-01-10			27.1	90	22	107	25.4	102		86	30.9
2019-01-11			28.7	91	22.5	108	26.6	103		87	32.9333
2019-01-12			30.7	92	23.2	109	27.7	104		88	33.3333
2019-01-13			32.6	93	22.8	110	29.2	105		89	32.4333
2019-01-14			34	94	21.4	111	29.8	106		90	30.9667
2019-01-15			34	95	20.9	112	33.3	107		91	30.2333
2019-01-16			33.9	96	22.9	113	35.5	108		92	30.3667
2019-01-17			30.6	97	23.7	114		109		93	31.8
2019-01-18			28.5	98	23.8	115		110		94	33.4333
2019-01-19			25.1	99	23.4	116	38.4	111		95	32.6
2019-01-20			22.1	100	23	117	39.2	112		96	32.0667
2019-01-21			21.2	101	24.5	118	37.3	113		97	30.7667
2019-01-22			21.5	102	24.7	119	36.7	114		98	31.1
2019-01-23			21.4	103	27	120	36.4	115		99	29.9333
2019-01-24			19.6	104	28	121	40.9	116		100	27.7
2019-01-25			20	105	31.5	122	42.7	117		101	26.1333
2019-01-26			20.6	106	32.8	123	42.9	118		102	24.2
2019-01-27			22.5	107	35.8	124	40.5	119		103	24.4667
2019-01-28			21.7	108	36.7	125	39	120		104	23.4667
2019-01-29			21.1	109	38.3	126	38.4	121		105	24.2667
2019-01-30			20.7	110	35.4	127	36.5	122		106	24.1667
2019-01-31			20.1	111	32.5	128	33.7	123		107	25.9333
2019-02-01			23.2	112	29.1	129	31.9	124		108	26.5667
2019-02-02			24.3	113	27.8	130	32.2	125		109	23.2524
2019-02-03			25.3	114	27.6	131	31.5	126		110	22.8524
2019-02-04			24.3	115	26.3	132	30.8	127		111	26.6333
2019-02-05			24.3	116	25.9	133	31	128		112	27.7667
2019-02-06			24.3	117	22.2	134	32.3	129		113	28.1667
2019-02-07			22.1	118	21.1	135	31.5	130		114	28.5667
2019-02-08			20	119	19.6	136	29.9	131		115	28.1667
2019-02-09			20	120	19.3	137	27	132		116	29.5333
2019-02-10			20.9	121	18.8	138	25.2	133		117	30
2019-02-11			22.6	122	17.2	139	26.6	134		118	29.8333
2019-02-12			27.2	123	21	140	28.6	135		119	28.4
2019-02-13			31.7	124	25.1	141	27.4	136		120	28.6667
2019-02-14			34.9	125	31	142	24.1	137		121	29.1
2019-02-15			34.5	126	33.4	143	22.3	138		122	30.2
2019-02-16			33	127	35.1	144	24.3	139		123	31.2333
2019-02-17			31.3	128	34.7	145	24.6	140		124	33.1333
2019-02-18			29.1	129	34.3	146	24.7	141		125	34.6
2019-02-19			28.5	130	36.9	147	23.5	142		126	34.7667
2019-02-20			27.6	131	36.9	148	24.5	143		127	33.0667
2019-02-21			28	132	40.3	149	23.6	144		128	31.6
2019-02-22			27.1	133	40.3	150	23.8	145		129	30.1667
2019-02-23			27.2	134	39.2	151	22.6	146		130	29.2667
2019-02-24			29	135	41.2	152	23.5	147		131	28.3667
2019-02-25			29.4	136	39.2	153	23.3	148		132	27.1
2019-02-26			30.9	137	39.2	154	22.4	149		133	26.0667
2019-02-27			28.4	138	35.9	155	22.9	150		134	25.3333
2019-02-28			31.2	139	35.9	156	24.1	151		135	26.2333
2019-03-01			31.5	140	35.9	157	26.6	152		136	25.4667
2019-03-02			32.9	141	35.9	158	26.7	153		137	24.7667
2019-03-03			32.2	142	34.2	159	26.2	154		138	23.1667
2019-03-04			33	143	34.2	160	26.2	155		139	24.2333
2019-03-05			34	144	32.5	161	26.6	156		140	25.7
2019-03-06			33.8	145	32.5	162	27.3	157		141	27.5667
2019-03-07			33.3	146	30	163	28.4	158		142	28.9
2019-03-08			33.7	147	30	164	29.4	159		143	30.3
2019-03-09			32.8	148	29.5	165	30.9	160		144	30.9
2019-03-10			30.8	149	29.5	166	29.5	161		145	30.7667
2019-03-11			27.9	150	28.7	167	28.4	162		146	30.0667
2019-03-12			26.1	151	28.7	168	27.9	163		147	31.3667
2019-03-13			25.1	152	28.2	169	28.4	164		148	31
2019-03-14			24.5	153	28.2	170	29.6	165		149	31.1667
2019-03-15			27.4	154	29	171	32.3	166		150	30.3667
2019-03-16			28.5	155	29	172	34.4	167		151	29.8
2019-03-17			29.3	156	33	173	36.7	168		152	30.9667
2019-03-18			30.2	157	33	174	35.4	169		153	30.1333
2019-03-19			32.1	158	32.9	175	35.3	170		154	30.9333
2019-03-20			30.9	159	32.9	176	34.9	171		155	30.2
2019-03-21			30.8	160	30.7	177	34.9	172		156	30.6
2019-03-22			31.2	161	30.7	178	35.1	173		157	31.1333
2019-03-23			31.1	162	26.3	179	35.4	174		158	32.1333
2019-03-24			29.5	163	26.3	180	34.3	175		159	31.5
2019-03-25			26.8	164	22.9	181	34.3	176		160	31.9667
2019-03-26			26	165	22.9	182	32.6	177		161	31.0667
2019-03-27			26.2	166	19.5	183	34.2	178		162	30.6667
2019-03-28			25.5	167	19.5	184	32.2	179		163	29.1333
2019-03-29			24.9	168	18.1	185	31.7	180		164	28.4
2019-03-30			22.7	169	19.6	186	29.3	181		165	28.3667
2019-03-31			23.8	170	22.2	187	29.8	182		166	29.3333
2019-04-01			23.9	171	23.9	188	30.3	183		167	29.5333
2019-04-02			24.2	172	26.1	189	29.8	184		168	30.1
2019-04-03			20.8	173	28.1	190	30.3	185		169	28.7667
2019-04-04			19.3	174	28.7	191	31.2	186		170	29.1
2019-04-05			18.2	175	28.1	192	33.7	187		171	29.2667
2019-04-06			19.7	176	27.4	193	34.8	188		172	29.3667
2019-04-07			21.2	177	26.8	194	34.9	189		173	29.6333
2019-04-08			21	178	25.4	195	33.5	190		174	29.2333
2019-04-09			19.7	179	26	196	32	191		175	28.4667
2019-04-10			19	180	27.4	197	32.1	192		176	28.9667
2019-04-11			21.6	181	28.4	198	30.2	193		177	28.1667
2019-04-12			23.1	182	27.9	199	29.3	194		178	28.6333
2019-04-13			23.4	183	26.5	200	27.5	195		179	26.0667
2019-04-14			25.3	184	25.6	201	29.8	196		180	25.6667
2019-04-15			28.2	185	25.6	202	29.8	197		181	24.6
2019-04-16			29.9	186	25.4	203	28.9	198		182	25.2667
2019-04-17			30.5	187	26.2	204	26.9	199		183	24.4
2019-04-18			30.4	188	22.7	205	25	200		184	24.8667
2019-04-19			30.9	189	21.2	206	24.6	201		185	25.5333
2019-04-20			30.8	190	21.7	207	24.2	202		186	26.9
2019-04-21			29.2	191	25.3	208	24.5	203		187	28.8
2019-04-22			28.8	192	27.6	209	24.4	204		188	29.7
2019-04-23			27.9	193	28.5	210	26.1	205		189	30.6333
2019-04-24			26.2	194	28	211	26.7	206		190	30.8
2019-04-25			24.5	195	29.2	212	29.2	207		191	29.9667
2019-04-26			21.9	196	28.9	213	29.4	208		192	29.6667
2019-04-27			22	197	28.7	214	30.3	209		193	28.5
2019-04-28			24.6	198	27.4	215	30.1	210		194	27.4333
2019-04-29			26.4	199	28.5	216	29	211		195	25.8
2019-04-30			25.8	200	29.3	217	27.6	212		196	25.9
2019-05-01			21.2	201	30.5	218	26.2	213		197	26.4
2019-05-02			18.7	202	29.1	219	25.5	214		198	27.3
2019-05-03			18.7	203	28.7	220	26.9	215		199	27.0667
2019-05-04			18.7	204	28.2	221	26	216		200	25.7667
2019-05-05			17.2	205	28.2	222	24.8	217		201	23.8
2019-05-06			17	206	28.2	223	23.5	218		202	22.8333
2019-05-07			19.8	207	26.9	224	23.8	219		203	22.8667
2019-05-08			24	208	28.2	225	24.3	220		204	23.1
2019-05-09			24.9	209	28.2	226	23.8	221		205	22
2019-05-10			23.5	210	29.7	227	23.2	222		206	21.6333
2019-05-11			21.5	211	29.7	228	24.4	223		207	23.5667
2019-05-12			21.7	212	30.3	229	24.2	224		208	26.2333
2019-05-13			21.7	213	30.3	230	23.2	225		209	27.6
2019-05-14			22.5	214	30.3	231	21.5	226		210	27.3667
2019-05-15			22.5	215	30.3	232	20.6	227		211	26.1667
2019-05-16			23.3	216	29.8	233	23.4	228		212	26.1667
2019-05-17			23.3	217	29.8	234	23.7	229		213	25.6
2019-05-18			26.1	218	28.2	235	27.4	230		214	25.5667
2019-05-19			26.1	219	28.2	236	26.7	231		215	25.6
2019-05-20			28.5	220	27.1	237	29.8	232		216	25.9333
2019-05-21			28.5	221	27.1	238	27	233		217	25.8
2019-05-22			30.4	222	26.5	239	27	234		218	26.7
2019-05-23			30.4	223	26.5	240	28.2	235		219	26.3333
2019-05-24			29.8	224	27.2	241	28.2	236		220	27.1667
2019-05-25			29.8	225	27.2	242	23.2	237		221	26.8333
2019-05-26					26.7	243	23.2	238		222	27.2667
2019-05-27					26.7	244	18.6			223	27.6667
2019-05-28							18.6			224	26.9667
2019-05-29							19.2			225	27.0667
2019-05-30							19.2			226	24.0001
2019-05-31							18.2			227	24.3001
2020-05-31										228	25.7001
										229	26.1501
										230	28.0001
										231	27.6501
										232	29.2001
										233	27.5501
										234	27.5501
										235	27.3501
										236	27.3501
										237	24.3001
										238	24.3001
										239	27.0051
										240	27.0051
										241	27.7051
										242	27.7051
										243	27.2051
										244	27.2051
