# Supplementary material for: An agroecological approach to preparation and use of a milk protein production baseline
Source: PeerJ. 2024 Sep 23;12:e18103. doi: 10.7717/peerj.18103 (PMC11426323; doi:10.7717/peerj.18103)
Supplement: Supplemental Information 3 — Data reordered from raw daily measurements to sequential data by individual cow. Data from this spreadsheet was transferred to MiniTab for REML analysis [file peerj-12-18103-s003.xlsx]

## Sheet: Coversheet
Data manipulation for this spreadsheet
1. Daily production data for all animals were converted to production sequences for individuals.
2. For each animal, day of peak production was determined from data smoothed by a 5-day rolling average
3. Animals whose lactations were complete within 51 weeks, consistent with normal NZ commercial practice, were selected for further analysis. Data are shown in pages with red tabs.
4. Estimations of daily milk solids, milk fat and milk protein were made, but only milk yield curves were calculated and presented.

## Sheet: Jan-feb 2016
Animal Number	Parity	Day Production	Smoothed Prod'n	Fat %	Protein %	Fat yield	Protein Yield	MS total	Weight	Days from peak	Date
12	2	15.3	20.5	4.38	5.41	0.67014	0.82773	1.49787		-216	2016-01-31
12	2	25.7	17.9	5.29	5.3	1.35953	1.3621	2.72163	421	-215	2016-02-01
12	2	12.7	18.3333	5.53	5.19	0.70231	0.65913	1.36144	422	-214	2016-02-02
12	2	16.6	16.0667	5.97	5.04	0.99102	0.83664	1.82766	423	-213	2016-02-03
12	2	18.9	18.5333	6.41	4.62	1.21149	0.87318	2.08467	429	-212	2016-02-04
12	2	20.1	20.0333	5.59	4.52	1.12359	0.90852	2.03211	425	-211	2016-02-05
12	2	21.1	20.9333	5.17	4.36	1.09087	0.91996	2.01083	441	-210	2016-02-06
12	2	21.6	21.6333	5.59	4.11	1.20744	0.88776	2.0952	435	-209	2016-02-07
12	2	22.2	22.3	5.13	4.07	1.13886	0.90354	2.0424	442	-208	2016-02-08
12	2	23.1	22.8333	4.72	3.95	1.09032	0.91245	2.00277	439	-207	2016-02-09
12	2	23.2	22.3667	4.58	3.91	1.06256	0.90712	1.96968	466	-206	2016-02-10
12	2	20.8	21.8667	4.35	3.88	0.9048	0.80704	1.71184	436	-205	2016-02-11
12	2	21.6	21.5	5.02	3.83	1.08432	0.82728	1.9116	441	-204	2016-02-12
12	2	22.1	22.0667	5.71	3.78	1.26191	0.83538	2.09729	435	-203	2016-02-13
12	2	22.5	22.5667	5.2	3.81	1.17	0.85725	2.02725	435	-202	2016-02-14
12	2	23.1	22.9333	5.36	3.83	1.23816	0.88473	2.12289	439	-201	2016-02-15
12	2	23.2	22.6667	4.96	3.81	1.15072	0.88392	2.03464	429	-200	2016-02-16
12	2	21.7	22.6667	5.39	3.78	1.16963	0.82026	1.98989	433	-199	2016-02-17
12	2	23.1	22.2667	5.37	3.78	1.24047	0.87318	2.11365	423	-198	2016-02-18
12	2	22	22.3	5.05	3.81	1.111	0.8382	1.9492	420	-197	2016-02-19
12	2	21.8	21.7667	4.62	3.82	1.00716	0.83276	1.83992	434	-196	2016-02-20
12	2	21.5	21.6667	5.34	3.71	1.1481	0.79765	1.94575	428	-195	2016-02-21
12	2	21.7	21.6333	5.51	3.69	1.19567	0.80073	1.9964	428	-194	2016-02-22
12	2	21.7	21.4667	5.11	3.69	1.10887	0.80073	1.9096	426	-193	2016-02-23
12	2	21	21.3333	5.26	3.67	1.1046	0.7707	1.8753	421	-192	2016-02-24
12	2	21.3	21.5	4.89	3.7	1.04157	0.7881	1.82967	446	-191	2016-02-25
12	2	22.2	21.2333	4.57	3.75	1.01454	0.8325	1.84704	430	-190	2016-02-26
12	2	20.2	21.6667	4.47	3.8	0.90294	0.7676	1.67054	422	-189	2016-02-27
12	2	22.6	22.3667	4.68	3.73	1.05768	0.84298	1.90066	433	-188	2016-02-28
12	2	24.3	23.2	4.7	3.76	1.1421	0.91368	2.05578	433	-187	2016-02-29
12	2	22.7	23.4	4.92	3.78	1.11684	0.85806	1.9749	428	-186	2016-03-01
12	2	23.2	22.1667	4.93	3.66	1.14376	0.84912	1.99288	432	-185	2016-03-02
12	2	20.6	22.2	4.51	3.75	0.92906	0.7725	1.70156	422	-184	2016-03-03
12	2	22.8	22.0667	4.64	3.83	1.05792	0.87324	1.93116	417	-183	2016-03-04
12	2	22.8	22.7	4.93	3.82	1.12404	0.87096	1.995	432	-182	2016-03-05
12	2	22.5	22.9	4.93	3.89	1.10925	0.87525	1.9845	447	-181	2016-03-06
12	2	23.4	23.0667	4.68	3.85	1.09512	0.9009	1.99602	423	-180	2016-03-07
12	2	23.3	23.4	4.81	3.84	1.12073	0.89472	2.01545	428	-179	2016-03-08
12	2	23.5	23.1667	4.73	3.84	1.11155	0.9024	2.01395	426	-178	2016-03-09
12	2	22.7	23.2333	4.6	3.86	1.0442	0.87622	1.92042	428	-177	2016-03-10
12	2	23.5	23.2333	4.76	3.84	1.1186	0.9024	2.021	453	-176	2016-03-11
12	2	23.5	23.3	5.06	3.81	1.1891	0.89535	2.08445	433	-175	2016-03-12
12	2	22.9	23.0333	5.09	3.86	1.16561	0.88394	2.04955	431	-174	2016-03-13
12	2	22.7	22.5	4.86	3.83	1.10322	0.86941	1.97263	434	-173	2016-03-14
12	2	21.9	22.3667	5.07	3.83	1.11033	0.83877	1.9491	432	-172	2016-03-15
12	2	22.5	21.9667	4.75	3.84	1.06875	0.864	1.93275	434	-171	2016-03-16
12	2	21.5	21.9333	5.26	3.81	1.1309	0.81915	1.95005	443	-170	2016-03-17
12	2	21.8	21.8333	5.48	3.86	1.19464	0.84148	2.03612	444	-169	2016-03-18
12	2	22.2	22.2	5.63	3.91	1.24986	0.86802	2.11788	484	-168	2016-03-19
12	2	22.6	22.2	5.56	3.95	1.25656	0.8927	2.14926	443	-167	2016-03-20
12	2	21.8	21.9667	5.12	3.97	1.11616	0.86546	1.98162	447	-166	2016-03-21
12	2	21.5	21.4333	5.04	3.97	1.0836	0.85355	1.93715	445	-165	2016-03-22
12	2	21	22	5.37	3.93	1.1277	0.8253	1.953	465	-164	2016-03-23
12	2	23.5	22.1	5.39	3.85	1.26665	0.90475	2.1714	464	-163	2016-03-24
12	2	21.8	21.1667	5.06	3.85	1.10308	0.8393	1.94238	438	-162	2016-03-25
12	2	18.2	20.5	5.44	3.91	0.99008	0.71162	1.7017	445	-161	2016-03-26
12	2	21.5	20.5	5.71	3.77	1.22765	0.81055	2.0382	445	-160	2016-03-27
12	2	21.8	21.4667	5.48	3.92	1.19464	0.85456	2.0492	454	-159	2016-03-28
12	2	21.1	21.8	5.57	3.9	1.17527	0.8229	1.99817	435	-158	2016-03-29
12	2	22.5	22.3333	5.15	3.9	1.15875	0.8775	2.03625	449	-157	2016-03-30
12	2	23.4	22.8333	5.08	3.91	1.18872	0.91494	2.10366	467	-156	2016-03-31
12	2	22.6	22.4333	5.08	3.95	1.14808	0.8927	2.04078	448	-155	2016-04-01
12	2	21.3	22.4	4.97	3.94	1.05861	0.83922	1.89783	442	-154	2016-04-02
12	2	23.3	21.5333	5.16	3.9	1.20228	0.9087	2.11098	460	-153	2016-04-03
12	2	20	21.7	5.33	3.84	1.066	0.768	1.834	447	-152	2016-04-04
12	2	21.8	21.0333	5.52	3.79	1.20336	0.82622	2.02958	461	-151	2016-04-05
12	2	21.3	21.4667	5.38	3.8	1.14594	0.8094	1.95534	450	-150	2016-04-06
12	2	21.3	19.8667	5.18	3.86	1.10334	0.82218	1.92552	464	-149	2016-04-07
12	2	17	19.2667	5.4	3.85	0.918	0.6545	1.5725	450	-148	2016-04-08
12	2	19.5	18	4.67	3.87	0.91065	0.75465	1.6653	452	-147	2016-04-09
12	2	17.5	17	4.76	3.84	0.833	0.672	1.505	463	-146	2016-04-10
12	2	14	17.6333	4.6	3.82	0.644	0.5348	1.1788	464	-145	2016-04-11
12	2	21.4	16.5667	5.74	3.8	1.22836	0.8132	2.04156	464	-144	2016-04-12
12	2	14.3	18.2667	4.93	3.86	0.70499	0.55198	1.25697	457	-143	2016-04-13
12	2	19.1	17.1333	4.8	3.88	0.9168	0.74108	1.65788	455	-142	2016-04-14
12	2	18	17.9	5.96	3.86	1.0728	0.6948	1.7676	455	-141	2016-04-15
12	2	16.6	18.2333	5.32	3.9	0.88312	0.6474	1.53052	443	-140	2016-04-16
12	2	20.1	18.7333	5.44	3.93	1.09344	0.78993	1.88337	446	-139	2016-04-17
12	2	19.5	19.6333	5.77	3.92	1.12515	0.7644	1.88955	457	-138	2016-04-18
12	2	19.3	19.3	5.23	3.99	1.00939	0.77007	1.77946	462	-137	2016-04-19
12	2	19.1	19.0667	5.09	4.09	0.97219	0.78119	1.75338	453	-136	2016-04-20
12	2	18.8	18.6	5.42	4.08	1.01896	0.76704	1.786	461	-135	2016-04-21
12	2	17.9	18.9	5.06	4.07	0.90574	0.72853	1.63427	469	-134	2016-04-22
12	2	20	18.4333	5.23	4.01	1.046	0.802	1.848	456	-133	2016-04-23
12	2	17.4	18.4333	5.16	4.03	0.89784	0.70122	1.59906	471	-132	2016-04-24
12	2	17.9	17.7	5.59	4.03	1.00061	0.72137	1.72198	481	-131	2016-04-25
12	2	17.8	18.2667	5.54	4.02	0.98612	0.71556	1.70168	469	-130	2016-04-26
12	2	19.1	18.1333	5.83	3.99	1.11353	0.76209	1.87562	454	-129	2016-04-27
12	2	17.5	18.6333	5.44	3.99	0.952	0.69825	1.65025	460	-128	2016-04-28
12	2	19.3	18.4	5.01	4.01	0.96693	0.77393	1.74086	467	-127	2016-04-29
12	2	18.4	18.4	5.23	4.06	0.96232	0.74704	1.70936	455	-126	2016-04-30
12	2	17.5	18.3667	5.11	4.11	0.89425	0.71925	1.6135	463	-125	2016-05-01
12	2	19.2	19	5.41	4.12	1.03872	0.79104	1.82976	465	-124	2016-05-02
12	2	20.3	18.8667	5.89	4.08	1.19567	0.82824	2.02391	473	-123	2016-05-03
12	2	17.1	18.8667	5.37	4.09	0.91827	0.69939	1.61766	465	-122	2016-05-04
12	2	19.2	18.5333	5.76	4.09	1.10592	0.78528	1.8912	473	-121	2016-05-05
12	2	19.3	17.7333	6.2	4.11	1.1966	0.79323	1.98983	466	-120	2016-05-06
12	2	14.7	17.6	6.03	4.06	0.88641	0.59682	1.48323	454	-119	2016-05-07
12	2	18.8	18.0333	5.8	4.04	1.0904	0.75952	1.84992	469	-118	2016-05-08
12	2	20.6	19.8333	5.97	4.08	1.22982	0.84048	2.0703	454	-117	2016-05-09
12	2	20.1	20.4	5.68	4.05	1.14168	0.81405	1.95573	468	-116	2016-05-10
12	2	20.5	20.5667	5.47	4.05	1.12135	0.83025	1.9516	475	-115	2016-05-11
12	2	21.1	20.8	5.52	4.08	1.16472	0.86088	2.0256	461	-114	2016-05-12
12	2	20.8	20.8667	5.7	4.1	1.1856	0.8528	2.0384	473	-113	2016-05-13
12	2	20.7	21.1333	5.76	4.07	1.19232	0.84249	2.03481	445	-112	2016-05-14
12	2	21.9	21.1	5.56	3.98	1.21764	0.87162	2.08926	469	-111	2016-05-15
12	2	20.7	21.2667	5.64	3.98	1.16748	0.82386	1.99134	456	-110	2016-05-16
12	2	21.2	20.9667	5.7	3.95	1.2084	0.8374	2.0458	467	-109	2016-05-17
12	2	21	20.6667	5.43	3.91	1.1403	0.8211	1.9614	459	-108	2016-05-18
12	2	19.8	18.7333	5.25	3.95	1.0395	0.7821	1.8216	458	-107	2016-05-19
12	2	15.4	17.9333	4.99	3.93	0.76846	0.60522	1.37368	454	-106	2016-05-20
12	2	18.6	18.0667	5.37	3.95	0.99882	0.7347	1.73352	461	-105	2016-05-21
12	2	20.2	19.8333	5.87	3.85	1.18574	0.7777	1.96344	453	-104	2016-05-22
12	2	20.7	19.9667	5.78	3.84	1.19646	0.79488	1.99134	452	-103	2016-05-23
12	2	19	19.6333	5.46	3.88	1.0374	0.7372	1.7746	449	-102	2016-05-24
12	2	19.2	19.3333	4.96	3.85	0.95232	0.7392	1.69152	442	-101	2016-05-25
12	2	19.8	19.6	4.82	3.86	0.95436	0.76428	1.71864	460	-100	2016-05-26
12	2	19.8	19.6667	5.42	3.89	1.07316	0.77022	1.84338	457	-99	2016-05-27
12	2	19.4	19.8	5.29	3.91	1.02626	0.75854	1.7848	444	-98	2016-05-28
12	2	20.2	20.2333	5.45	3.94	1.1009	0.79588	1.89678	459	-97	2016-05-29
12	2	21.1	20.8667	5.19	3.89	1.09509	0.82079	1.91588	457	-96	2016-05-30
12	2	21.3	21.0333	5.33	3.92	1.13529	0.83496	1.97025	455	-95	2016-05-31
12	2	20.7	20.4333	5.28	3.93	1.09296	0.81351	1.90647	468	-94	2016-06-01
12	2	19.3	21	4.89	3.9	0.94377	0.7527	1.69647	466	-93	2016-06-02
12	2	23	20.5333	5.44	3.85	1.2512	0.8855	2.1367	459	-92	2016-06-03
12	2	19.3	20.8333	5.27	3.77	1.01711	0.72761	1.74472	453	-91	2016-06-04
12	2	20.2	19.4	5.4	3.78	1.0908	0.76356	1.85436	459	-90	2016-06-05
12	2	18.7	19.2	5.47	3.84	1.02289	0.71808	1.74097	452	-89	2016-06-06
12	2	18.7	18.9333	5.62	3.83	1.05094	0.71621	1.76715	457	-88	2016-06-07
12	2	19.4	19.0667	5.3	3.77	1.0282	0.73138	1.75958	459	-87	2016-06-08
12	2	19.1	19.1333	5.08	3.79	0.97028	0.72389	1.69417	457	-86	2016-06-09
12	2	18.9	19.2	5.56	3.86	1.05084	0.72954	1.78038	459	-85	2016-06-10
12	2	19.6	19.1333	5.58	3.86	1.09368	0.75656	1.85024	480	-84	2016-06-11
12	2	18.9	19.6333	5.18	3.85	0.97902	0.72765	1.70667	457	-83	2016-06-12
12	2	20.4	20.3	5.19	3.86	1.05876	0.78744	1.8462	462	-82	2016-06-13
12	2	21.6	20.6667	5.47	3.89	1.18152	0.84024	2.02176	458	-81	2016-06-14
12	2	20	21.2	5.33	3.93	1.066	0.786	1.852	459	-80	2016-06-15
12	2	22	20.8667	5.27	3.83	1.1594	0.8426	2.002	461	-79	2016-06-16
12	2	20.6	20.7667	5.39	3.82	1.11034	0.78692	1.89726	450	-78	2016-06-17
12	2	19.7	20.3667	5.1	3.84	1.0047	0.75648	1.76118	460	-77	2016-06-18
12	2	20.8	20.1667	5.24	3.8	1.08992	0.7904	1.88032	443	-76	2016-06-19
12	2	20	20.5333	5.11	3.76	1.022	0.752	1.774	449	-75	2016-06-20
12	2	20.8	21.1667	5.07	3.76	1.05456	0.78208	1.83664	456	-74	2016-06-21
12	2	22.7	21.8667	5.12	3.78	1.16224	0.85806	2.0203	457	-73	2016-06-22
12	2	22.1	22.5	4.76	3.8	1.05196	0.8398	1.89176	460	-72	2016-06-23
12	2	22.7	22.0333	4.95	3.74	1.12365	0.84898	1.97263	457	-71	2016-06-24
12	2	21.3	22.1667	4.91	3.76	1.04583	0.80088	1.84671	456	-70	2016-06-25
12	2	22.5	22.3667	5.07	3.77	1.14075	0.84825	1.989	461	-69	2016-06-26
12	2	23.3	22.1333	5.12	3.68	1.19296	0.85744	2.0504	448	-68	2016-06-27
12	2	20.6	21.6333	4.73	3.67	0.97438	0.75602	1.7304	451	-67	2016-06-28
12	2	21	20.9333	4.69	3.63	0.9849	0.7623	1.7472	448	-66	2016-06-29
12	2	21.2	21.4333	5	3.62	1.06	0.76744	1.82744	452	-65	2016-06-30
12	2	22.1	21.3333	4.8	3.64	1.0608	0.80444	1.86524	493	-64	2016-07-01
12	2	20.7	21.3	4.67	3.67	0.96669	0.75969	1.72638	456	-63	2016-07-02
12	2	21.1	21.2333	4.87	3.65	1.02757	0.77015	1.79772	451	-62	2016-07-03
12	2	21.9	21.7333	4.91	3.61	1.07529	0.79059	1.86588	450	-61	2016-07-04
12	2	22.2	21.8667	4.86	3.65	1.07892	0.8103	1.88922	456	-60	2016-07-05
12	2	21.5	22.4667	4.45	3.64	0.95675	0.7826	1.73935	455	-59	2016-07-06
12	2	23.7	21.9667	4.9	3.61	1.1613	0.85557	2.01687	458	-58	2016-07-07
12	2	20.7	21.7	4.76	3.67	0.98532	0.75969	1.74501	440	-57	2016-07-08
12	2	20.7	21.1	4.54	3.68	0.93978	0.76176	1.70154	440	-56	2016-07-09
12	2	21.9	21.8333	5.33	3.56	1.16727	0.77964	1.94691	457	-55	2016-07-10
12	2	22.9	22.5333	5.03	3.56	1.15187	0.81524	1.96711	471	-54	2016-07-11
12	2	22.8	22.8333	4.8	3.62	1.0944	0.82536	1.91976	462	-53	2016-07-12
12	2	22.8	22.6333	4.9	3.63	1.1172	0.82764	1.94484	453	-52	2016-07-13
12	2	22.3	22.2667	4.73	3.67	1.05479	0.81841	1.8732	458	-51	2016-07-14
12	2	21.7	22.3333	4.44	3.7	0.96348	0.8029	1.76638	454	-50	2016-07-15
12	2	23	22.1667	4.77	3.67	1.0971	0.8441	1.9412	455	-49	2016-07-16
12	2	21.8	22.4	4.69	3.68	1.02242	0.80224	1.82466	486	-48	2016-07-17
12	2	22.4	22.2	4.66	3.67	1.04384	0.82208	1.86592	448	-47	2016-07-18
12	2	22.4	22.4	4.88	3.6	1.09312	0.8064	1.89952	455	-46	2016-07-19
12	2	22.4	22.2	4.81	3.62	1.07744	0.81088	1.88832	459	-45	2016-07-20
12	2	21.8	20.1	5.06	3.61	1.10308	0.78698	1.89006	456	-44	2016-07-21
12	2	16.1	19.3667	5.27	3.59	0.84847	0.57799	1.42646	462	-43	2016-07-22
12	2	20.2	19.1667	4.84	3.62	0.97768	0.73124	1.70892	504	-42	2016-07-23
12	2	21.2	20.9333	5.24	3.56	1.11088	0.75472	1.8656	461	-41	2016-07-24
12	2	21.4	21.4667	5.05	3.54	1.0807	0.75756	1.83826	458	-40	2016-07-25
12	2	21.8	21.4667	4.96	3.64	1.08128	0.79352	1.8748	454	-39	2016-07-26
12	2	21.2	21.7667	5.08	3.68	1.07696	0.78016	1.85712	447	-38	2016-07-27
12	2	22.3	22	4.87	3.69	1.08601	0.82287	1.90888	457	-37	2016-07-28
12	2	22.5	21.4667	4.61	3.67	1.03725	0.82575	1.863	456	-36	2016-07-29
12	2	19.6	21.9333	4.18	3.77	0.81928	0.73892	1.5582	455	-35	2016-07-30
12	2	23.7	21.8	4.47	3.79	1.05939	0.89823	1.95762	452	-34	2016-07-31
12	2	22.1	22.5667	5.37	3.77	1.18677	0.83317	2.01994	450	-33	2016-08-01
12	2	21.9	22.1	5.19	3.83	1.13661	0.83877	1.97538	459	-32	2016-08-02
12	2	22.3	21.6	5.21	3.85	1.16183	0.85855	2.02038	460	-31	2016-08-03
12	2	20.6	21.3	5.33	3.88	1.09798	0.79928	1.89726	447	-30	2016-08-04
12	2	21	20.7333	5.51	3.83	1.1571	0.8043	1.9614	458	-29	2016-08-05
12	2	20.6	21.2333	5.04	3.8	1.03824	0.7828	1.82104	462	-28	2016-08-06
12	2	22.1	20.7667	5.32	3.86	1.17572	0.85306	2.02878	485	-27	2016-08-07
12	2	19.6	20.8667	5.69	3.84	1.11524	0.75264	1.86788	462	-26	2016-08-08
12	2	20.9	20.2	5.67	3.83	1.18503	0.80047	1.9855	466	-25	2016-08-09
12	2	20.1	20.5	5.28	3.83	1.06128	0.76983	1.83111	494	-24	2016-08-10
12	2	20.5	20.4	5.44	3.86	1.1152	0.7913	1.9065	459	-23	2016-08-11
12	2	20.6	20.4667	5.53	3.96	1.13918	0.81576	1.95494	483	-22	2016-08-12
12	2	20.3	20.3333	5.77	3.98	1.17131	0.80794	1.97925	455	-21	2016-08-13
12	2	20.1	20.0333	5.72	3.93	1.14972	0.78993	1.93965	459	-20	2016-08-14
12	2	19.7	20.2	5.65	3.89	1.11305	0.76633	1.87938	464	-19	2016-08-15
12	2	20.8	20.3	6.04	3.88	1.25632	0.80704	2.06336	474	-18	2016-08-16
12	2	20.4	19.0667	5.54	3.86	1.13016	0.78744	1.9176	463	-17	2016-08-17
12	2	16	18.9667	4.86	3.82	0.7776	0.6112	1.3888	460	-16	2016-08-18
12	2	20.5	19	5.28	3.89	1.0824	0.79745	1.87985	457	-15	2016-08-19
12	2	20.5	18.1667	5.85	3.85	1.19925	0.78925	1.9885	470	-14	2016-08-20
12	2	13.5	20.0667	5.57	3.78	0.75195	0.5103	1.26225	454	-13	2016-08-21
12	2	26.2	20.1333	5.32	3.8	1.39384	0.9956	2.38944	469	-12	2016-08-22
12	2	20.7	22.7333	5.41	3.77	1.11987	0.78039	1.90026	454	-11	2016-08-23
12	2	21.3	21.6	5.18	3.76	1.10334	0.80088	1.90422	466	-10	2016-08-24
12	2	22.8	22.1667	5.42	3.79	1.23576	0.86412	2.09988	463	-9	2016-08-25
12	2	22.4	22.2667	5.61	3.78	1.25664	0.84672	2.10336	460	-8	2016-08-26
12	2	21.6	21.9667	5.39	3.83	1.16424	0.82728	1.99152	457	-7	2016-08-27
12	2	21.9	21.5333	5.27	3.82	1.15413	0.83658	1.99071	458	-6	2016-08-28
12	2	21.1	21.3333	5.16	3.77	1.08876	0.79547	1.88423	480	-5	2016-08-29
12	2	21	20.5667	5.09	3.78	1.0689	0.7938	1.8627	467	-4	2016-08-30
12	2	19.6	20.3667	5.04	3.77	0.98784	0.73892	1.72676	463	-3	2016-08-31
12	2	20.5	20.1	5.27	3.75	1.08035	0.76875	1.8491	457	-2	2016-09-01
12	2	20.2	20.1667	5.56	3.67	1.12312	0.74134	1.86446	469	-1	2016-09-02
12	2	19.8	24.2667	5.1	3.68	1.0098	0.72864	1.73844	466	0	2016-09-03
12	2	32.8	24.2333	5.54	3.7	1.81712	1.2136	3.03072	464	1	2016-09-04
12	2	20.1	24.2667	5.46	3.69	1.09746	0.74169	1.83915	455	2	2016-09-05
12	2	19.9	20.2	5.31	3.65	1.05669	0.72635	1.78304	511	3	2016-09-06
12	2	20.6	20.3	5.4	3.61	1.1124	0.74366	1.85606	464	4	2016-09-07
12	2	20.4	20.5667	5.02	3.61	1.02408	0.73644	1.76052	471	5	2016-09-08
12	2	20.7	20.6667	5.67	3.57	1.17369	0.73899	1.91268	470	6	2016-09-09
12	2	20.9	20.6667	5.53	3.57	1.15577	0.74613	1.9019	461	7	2016-09-10
12	2	20.4	20.4667	5.14	3.59	1.04856	0.73236	1.78092	461	8	2016-09-11
12	2	20.1	20.3	4.97	3.62	0.99897	0.72762	1.72659	456	9	2016-09-12
12	2	20.4	20.3	5.49	3.61	1.11996	0.73644	1.8564	476	10	2016-09-13
12	2	20.4	20.4667	5.49	3.61	1.11996	0.73644	1.8564	511	11	2016-09-14
12	2	20.6	20.4667	5.21	3.63	1.07326	0.74778	1.82104	477	12	2016-09-15
12	2	20.4	20.7667	4.85	3.49	0.9894	0.71196	1.70136	460	13	2016-09-16
12	2	21.3	20.7667	4.88	3.32	1.03944	0.70716	1.7466	461	14	2016-09-17
12	2	20.6	20.8667	4.43	3.31	0.91258	0.68186	1.59444	465	15	2016-09-18
12	2	20.7	20.4	4.68	3.33	0.96876	0.68931	1.65807	459	16	2016-09-19
12	2	19.9	19.9	4.43	3.34	0.88157	0.66466	1.54623	463	17	2016-09-20
12	2	19.1	19.7333	3.97	3.32	0.75827	0.63412	1.39239	455	18	2016-09-21
12	2	20.2	20	4.49	3.19	0.90698	0.64438	1.55136	477	19	2016-09-22
12	2	20.7	20.3333	4.54	3.15	0.93978	0.65205	1.59183	466	20	2016-09-23
12	2	20.1	19.9333	4.4	3.24	0.8844	0.65124	1.53564	466	21	2016-09-24
12	2	19	19.7333	4.44	3.27	0.8436	0.6213	1.4649	466	22	2016-09-25
12	2	20.1	19.8	4.52	3.25	0.90852	0.65325	1.56177	472	23	2016-09-26
12	2	20.3	20.2333	4.35	3.3	0.88305	0.6699	1.55295	477	24	2016-09-27
12	2	20.3	20.4667	4.44	3.29	0.90132	0.66787	1.56919	474	25	2016-09-28
12	2	20.8	20.4	4.58	3.34	0.95264	0.69472	1.64736	468	26	2016-09-29
12	2	20.1	20.2667	4.54	3.33	0.91254	0.66933	1.58187	472	27	2016-09-30
12	2	19.9	20.3667	4.33	3.46	0.86167	0.68854	1.55021	475	59	2016-11-01
12	2	21.1	20.6667	4.44	3.5	0.93684	0.7385	1.67534	474	60	2016-11-02
12	2	21	20.7	4.65	3.52	0.9765	0.7392	1.7157	501	61	2016-11-03
12	2	20	20.2333	4.35	3.52	0.87	0.704	1.574	469	62	2016-11-04
12	2	19.7	18.2667	4.42	3.57	0.87074	0.70329	1.57403	476	63	2016-11-05
12	2	15.1	17.7333	4.66	3.55	0.70366	0.53605	1.23971	470	64	2016-11-06
12	2	18.4	17.3333	4.66	3.6	0.85744	0.6624	1.51984	483	65	2016-11-07
12	2	18.5	20.0333	4.74	3.56	0.8769	0.6586	1.5355	477	66	2016-11-08
12	2	23.2	20.0667	5.05	3.6	1.1716	0.8352	2.0068	476	67	2016-11-09
12	2	18.5	20.1333	5.04	3.63	0.9324	0.67155	1.60395	474	68	2016-11-10
12	2	18.7	18.6	4.78	3.63	0.89386	0.67881	1.57267	478	69	2016-11-11
12	2	18.6	18.8667	4.96	3.59	0.92256	0.66774	1.5903	487	70	2016-11-12
12	2	19.3	18.9333	5.52	3.62	1.06536	0.69866	1.76402	488	71	2016-11-13
12	2	18.9	18.3667	5.26	3.77	0.99414	0.71253	1.70667	517	72	2016-11-14
12	2	16.9	18.6	4.96	3.85	0.83824	0.65065	1.48889	477	73	2016-11-15
12	2	20	17.7	5.32	3.95	1.064	0.79	1.854	482	74	2016-11-16
12	2	16.2	18	5.34	3.89	0.86508	0.63018	1.49526	480	75	2016-11-17
12	2	17.8	17.3667	5.39	3.77	0.95942	0.67106	1.63048	480	76	2016-11-18
12	2	18.1	18	5.45	3.84	0.98645	0.69504	1.68149	480	77	2016-11-19
12	2	18.1	18.1667	5.32	3.86	0.96292	0.69866	1.66158	483	78	2016-11-20
12	2	18.3	17.8333	5.18	3.85	0.94794	0.70455	1.65249	476	79	2016-11-21
12	2	17.1	17.3	5.37	3.92	0.91827	0.67032	1.58859	488	80	2016-11-22
12	2	16.5	17.1333	5.42	3.86	0.8943	0.6369	1.5312	476	81	2016-11-23
12	2	17.8	17.0333	5.25	3.75	0.9345	0.6675	1.602	487	82	2016-11-24
12	2	16.8	17.9	5.18	3.73	0.87024	0.62664	1.49688	490	83	2016-11-25
12	2	19.1	17.7333	5.51	3.81	1.05241	0.72771	1.78012	481	84	2016-11-26
12	2	17.3	18.0667	5.55	3.86	0.96015	0.66778	1.62793	488	85	2016-11-27
12	2	17.8	17.5	5.23	3.87	0.93094	0.68886	1.6198	479	86	2016-11-28
12	2	17.4	16.0333	5.25	3.93	0.9135	0.68382	1.59732	486	87	2016-11-29
12	2	12.9	15.4667	5.16	3.99	0.66564	0.51471	1.18035	478	88	2016-11-30
12	2	16.1	15.0333			0	0	0	485	89	2016-12-01
12	2	16.1	16.0667	5.12	3.86	0.82432	0.62146	1.44578	487	90	2016-12-02
12	2	16	17	5.06	3.9	0.8096	0.624	1.4336	550	91	2016-12-03
12	2	18.9	17.3667	5.36	3.92	1.01304	0.74088	1.75392	483	92	2016-12-04
12	2	17.2	17.3333	5.77	3.94	0.99244	0.67768	1.67012	479	93	2016-12-05
12	2	15.9	16.1333	5.51	3.95	0.87609	0.62805	1.50414	482	94	2016-12-06
12	2	15.3	15.5667	5.63	3.93	0.86139	0.60129	1.46268	488	95	2016-12-07
12	2	15.5	15.4333	5.6	3.87	0.868	0.59985	1.46785	497	96	2016-12-08
12	2	15.5	15.3	5.69	3.82	0.88195	0.5921	1.47405	500	97	2016-12-09
12	2	14.9	15.6	5.74	3.88	0.85526	0.57812	1.43338	485	98	2016-12-10
12	2	16.4	15.7	5.28	3.8	0.86592	0.6232	1.48912	483	99	2016-12-11
12	2	15.8	16.3	5.02	3.77	0.79316	0.59566	1.38882	481	100	2016-12-12
12	2	16.7	16.1667	5.3	3.81	0.8851	0.63627	1.52137	488	101	2016-12-13
12	2	16	16.2333	5.48	3.86	0.8768	0.6176	1.4944	482	102	2016-12-14
12	2	16	16.1333	5.32	3.85	0.8512	0.616	1.4672	485	103	2016-12-15
12	2	16.4	16.4	5.3	3.82	0.8692	0.62648	1.49568	491	104	2016-12-16
12	2	16.8	16.5333	5.31	3.83	0.89208	0.64344	1.53552	484	105	2016-12-17
12	2	16.4	16.3	5.41	3.86	0.88724	0.63304	1.52028	481	106	2016-12-18
12	2	15.7	16.0333	5.32	3.82	0.83524	0.59974	1.43498	485	107	2016-12-19
12	2	16	15.6333	5.36	3.79	0.8576	0.6064	1.464	484	108	2016-12-20
12	2	15.2	15.6	5.5	3.73	0.836	0.56696	1.40296	479	109	2016-12-21
12	2	15.6	15.7	5.4	3.71	0.8424	0.57876	1.42116	480	110	2016-12-22
12	2	16.3	16.2333	4.96	3.72	0.80848	0.60636	1.41484	478	111	2016-12-23
12	2	16.8	16.7333	4.91	3.73	0.82488	0.62664	1.45152	489	112	2016-12-24
12	2	17.1	16.8667	5.1	3.78	0.8721	0.64638	1.51848	492	113	2016-12-25
12	2	16.7	16.8	5.24	3.79	0.87508	0.63293	1.50801	496	114	2016-12-26
12	2	16.6	16.6667	5.13	3.77	0.85158	0.62582	1.4774	482	115	2016-12-27
12	2	16.7	16.8	5.02	3.75	0.83834	0.62625	1.46459	484	116	2016-12-28
12	2	17.1	16.8667	5	3.71	0.855	0.63441	1.48941	489	117	2016-12-29
12	2	16.8	16.8667	4.91	3.69	0.82488	0.61992	1.4448	485	118	2016-12-30
12	2	16.7	16.5333	4.9	3.74	0.8183	0.62458	1.44288	481	119	2016-12-31
12	2	16.1	16.3333	5.19	3.77	0.83559	0.60697	1.44256	482	120	2017-01-01
12	2	16.2	16.7	5.17	3.72	0.83754	0.60264	1.44018	490	121	2017-01-02
12	2	17.8	17.1	5.05	3.68	0.8989	0.65504	1.55394	491	122	2017-01-03
12	2	17.3	17.3667	5.07	3.77	0.87711	0.65221	1.52932	487	123	2017-01-04
12	2	17	15.6	5.19	3.82	0.8823	0.6494	1.5317	492	124	2017-01-05
12	2	12.5	15.2	4.97	3.82	0.62125	0.4775	1.09875	491	125	2017-01-06
12	2	16.1	14.8333	5.01	3.83	0.80661	0.61663	1.42324	489	126	2017-01-07
12	2	15.9	15.8	5.45	3.85	0.86655	0.61215	1.4787	489	127	2017-01-08
12	2	15.4	15.8333	5.52	3.78	0.85008	0.58212	1.4322	516	128	2017-01-09
12	2	16.2	15.8667	5.24	3.75	0.84888	0.6075	1.45638	487	129	2017-01-10
12	2	16	15.5333	4.97	3.76	0.7952	0.6016	1.3968	486	130	2017-01-11
12	2	14.4	15.6667	4.79	3.74	0.68976	0.53856	1.22832	494	131	2017-01-12
12	2	16.6	16	5.15	3.74	0.8549	0.62084	1.47574	571	132	2017-01-13
12	2	17	16.7333	5.65	3.73	0.9605	0.6341	1.5946	501	133	2017-01-14
12	2	16.6	16.6667	5.44	3.77	0.90304	0.62582	1.52886	498	134	2017-01-15
12	2	16.4	16.4	5.27	3.86	0.86428	0.63304	1.49732	499	135	2017-01-16
12	2	16.2	16.4667	5.2	3.87	0.8424	0.62694	1.46934	498	136	2017-01-17
12	2	16.8	16.4333	5.17	3.86	0.86856	0.64848	1.51704	485	137	2017-01-18
12	2	16.3	17.0333	5.25	3.84	0.85575	0.62592	1.48167	492	138	2017-01-19
12	2	18	17.6333	5.23	3.82	0.9414	0.6876	1.629	487	139	2017-01-20
12	2	18.6	18.3	5.16	3.84	0.95976	0.71424	1.674	505	140	2017-01-21
12	2	18.3	18.3	5.16	3.88	0.94428	0.71004	1.65432	491	141	2017-01-22
12	2	18	18.0667	5.27	3.93	0.9486	0.7074	1.656	494	142	2017-01-23
12	2	17.9	17.5	5.38	3.88	0.96302	0.69452	1.65754	496	143	2017-01-24
12	2	16.6	17.4333	5.16	3.83	0.85656	0.63578	1.49234	509	144	2017-01-25
12	2	17.8	17.6	5.06	3.74	0.90068	0.66572	1.5664	492	145	2017-01-26
12	2	18.4	17.9667	5.04	3.73	0.92736	0.68632	1.61368	494	146	2017-01-27
12	2	17.7	17.9	5.02	3.78	0.88854	0.66906	1.5576	496	147	2017-01-28
12	2	17.6	17.1333	5.15	3.78	0.9064	0.66528	1.57168	492	148	2017-01-29
12	2	16.1	17.0667	5.13	3.78	0.82593	0.60858	1.43451	493	149	2017-01-30
12	2	17.5	16.8667	5.13	3.72	0.89775	0.651	1.54875	492	150	2017-01-31
12	2	17	17.2667	5.18	3.7	0.8806	0.629	1.5096	493	151	2017-02-01
12	2	17.3	16.9	4.96	3.68	0.85808	0.63664	1.49472	497	152	2017-02-02
12	2	16.4	17.1	4.7	3.69	0.7708	0.60516	1.37596	497	153	2017-02-03
12	2	17.6	17.1333	5.24	3.66	0.92224	0.64416	1.5664	498	154	2017-02-04
12	2	17.4	17.4333	5.26	3.67	0.91524	0.63858	1.55382	497	155	2017-02-05
12	2	17.3	17.2333	5.13	3.71	0.88749	0.64183	1.52932	512	156	2017-02-06
12	2	17	17.3667	5.11	3.71	0.8687	0.6307	1.4994	496	157	2017-02-07
12	2	17.8	17.4667	5.04	3.73	0.89712	0.66394	1.56106	500	158	2017-02-08
12	2	17.6	17.5	4.72	3.67	0.83072	0.64592	1.47664	497	159	2017-02-09
12	2	17.1	17.1667	4.8	3.67	0.8208	0.62757	1.44837	500	160	2017-02-10
12	2	16.8	16.7	4.98	3.67	0.83664	0.61656	1.4532	509	161	2017-02-11
12	2	16.2	16.5667	4.96	3.7	0.80352	0.5994	1.40292	507	162	2017-02-12
12	2	16.7	16.4667	5.19	3.75	0.86673	0.62625	1.49298	530	163	2017-02-13
12	2	16.5	16.8667	4.82	3.71	0.7953	0.61215	1.40745	516	164	2017-02-14
12	2	17.4	16.6667	4.68	3.67	0.81432	0.63858	1.4529	510	165	2017-02-15
12	2	16.1	16.5	4.9	3.71	0.7889	0.59731	1.38621	507	166	2017-02-16
12	2	16	15.8	5.23	3.75	0.8368	0.6	1.4368	499	167	2017-02-17
12	2	15.3	15.9	5.24	3.76	0.80172	0.57528	1.377	516	168	2017-02-18
12	2	16.4	15.5333	5.37	3.76	0.88068	0.61664	1.49732	514	169	2017-02-19
12	2	14.9	15.4	5.53	3.78	0.82397	0.56322	1.38719	516	170	2017-02-20
12	2	14.9	14.4333	5.22	3.81	0.77778	0.56769	1.34547	506	171	2017-02-21
12	2	13.5	14.0333	4.95	3.77	0.66825	0.50895	1.1772	522	172	2017-02-22
12	2	13.7	13.3667	5.37	3.71	0.73569	0.50827	1.24396	520	173	2017-02-23
12	2	12.9	13.4	5.5	3.71	0.7095	0.47859	1.18809	515	174	2017-02-24
12	2	13.6	13.3333	5.57	3.73	0.75752	0.50728	1.2648	504	175	2017-02-25
12	2	13.5	13.3667	5.75	3.73	0.77625	0.50355	1.2798	503	176	2017-02-26
12	2	13	13.2667	5.47	3.79	0.7111	0.4927	1.2038	526	177	2017-02-27
12	2	13.3	13.1333	5.5	3.95	0.7315	0.52535	1.25685	515	178	2017-02-28
12	2	13.1	13.4333	5.97	4.17	0.78207	0.54627	1.32834	528	179	2017-03-01
12	2	13.9	13.5667	6.03	4.18	0.83817	0.58102	1.41919	518	180	2017-03-02
12	2	13.7	13.8	6.18	4.18	0.84666	0.57266	1.41932	519	181	2017-03-03
12	2	13.8	13.8667	6.09	4.18	0.84042	0.57684	1.41726	517	182	2017-03-04
12	2	14.1	13.9	5.72	4.16	0.80652	0.58656	1.39308	522	183	2017-03-05
12	2	13.8	13.8333	5.48	4.19	0.75624	0.57822	1.33446	520	184	2017-03-06
12	2	13.6	13.4667	5.64	4.23	0.76704	0.57528	1.34232	536	185	2017-03-07
12	2	13	13.2667	5.84	4.21	0.7592	0.5473	1.3065	524	186	2017-03-08
12	2	13.2	12.8333	5.72	4.18	0.75504	0.55176	1.3068	522	187	2017-03-09
12	2	12.3	11.2333	5.57	4.21	0.68511	0.51783	1.20294	518	188	2017-03-10
12	2	8.2	9.06667	5.23	4.26	0.42886	0.34932	0.77818	476	189	2017-03-11
12	2	6.7	7.8	5.37	4.29	0.35979	0.28743	0.64722	497	190	2017-03-12
12	2	8.5	7.86667	6.15	4.16	0.52275	0.3536	0.87635	490	191	2017-03-13
12	2	8.4	8.93333	6.98	3.92	0.58632	0.32928	0.9156	504	192	2017-03-14
12	2	9.9	9.33333	6.65	3.83	0.65835	0.37917	1.03752	508	193	2017-03-15
12	2	9.7	9.8	6.23	3.85	0.60431	0.37345	0.97776	515	194	2017-03-16
24	4	13.6	10.85	5.87	5.44	0.79832	0.73984	1.53816		-166	2016-02-12
24	4	8.1	12.8333	6.76	5.16	0.54756	0.41796	0.96552	561	-165	2016-02-13
24	4	16.8	15.0667	7.03	4.94	1.18104	0.82992	2.01096	582	-164	2016-02-14
24	4	20.3	20.2	6.56	4.98	1.33168	1.01094	2.34262	582	-163	2016-02-15
24	4	23.5	22.7	6.42	4.89	1.5087	1.14915	2.65785	596	-162	2016-02-16
24	4	24.3	24.3667	6.33	4.83	1.53819	1.17369	2.71188	601	-161	2016-02-17
24	4	25.3	24.8	6.26	4.78	1.58378	1.20934	2.79312	602	-160	2016-02-18
24	4	24.8	25.1667	6.2	4.73	1.5376	1.17304	2.71064	601	-159	2016-02-19
24	4	25.4	25.5667	5.77	4.65	1.46558	1.1811	2.64668	608	-158	2016-02-20
24	4	26.5	26.1	5.69	4.57	1.50785	1.21105	2.7189	598	-157	2016-02-21
24	4	26.4	26.8	5.78	4.4	1.52592	1.1616	2.68752	592	-156	2016-02-22
24	4	27.5	27.1	5.69	4.3	1.56475	1.1825	2.74725	594	-155	2016-02-23
24	4	27.4	28.1333	5.52	4.17	1.51248	1.14258	2.65506	587	-154	2016-02-24
24	4	29.5	28.6333	5.49	4.19	1.61955	1.23605	2.8556	588	-153	2016-02-25
24	4	29	29.5	5.39	4.22	1.5631	1.2238	2.7869	578	-152	2016-02-26
24	4	30	28.6	5.72	4.16	1.716	1.248	2.964	594	-151	2016-02-27
24	4	26.8	28.7	5.52	4.07	1.47936	1.09076	2.57012	571	-150	2016-02-28
24	4	29.3	28.0667	5.55	4	1.62615	1.172	2.79815	588	-149	2016-02-29
24	4	28.1	28.5667	5.52	4.07	1.55112	1.14367	2.69479	589	-148	2016-03-01
24	4	28.3	28.8333	5.51	4.09	1.55933	1.15747	2.7168	598	-147	2016-03-02
24	4	30.1	29.2667	5.46	4.13	1.64346	1.24313	2.88659	589	-146	2016-03-03
24	4	29.4	29.2	5.46	4.21	1.60524	1.23774	2.84298	607	-145	2016-03-04
24	4	28.1	28.6	5.49	4.21	1.54269	1.18301	2.7257	615	-144	2016-03-05
24	4	28.3	27.9333	5.31	4.18	1.50273	1.18294	2.68567	615	-143	2016-03-06
24	4	27.4	27.4667	5.63	4.17	1.54262	1.14258	2.6852	600	-142	2016-03-07
24	4	26.7	27.5333	5.99	4.18	1.59933	1.11606	2.71539	603	-141	2016-03-08
24	4	28.5	27.7	5.5	4.16	1.5675	1.1856	2.7531	616	-140	2016-03-09
24	4	27.9	27.9333	5.95	4.22	1.66005	1.17738	2.83743	615	-139	2016-03-10
24	4	27.4	27.8667	5.64	4.18	1.54536	1.14532	2.69068	612	-138	2016-03-11
24	4	28.3	28.0333	5.64	4.13	1.59612	1.16879	2.76491	602	-137	2016-03-12
24	4	28.4	28.7333	5.74	4.14	1.63016	1.17576	2.80592	617	-136	2016-03-13
24	4	29.5	29.4333	5.55	4.1	1.63725	1.2095	2.84675	621	-135	2016-03-14
24	4	30.4	29.3667	5.38	4.16	1.63552	1.26464	2.90016	629	-134	2016-03-15
24	4	28.2	29.3	5.59	4.19	1.57638	1.18158	2.75796	618	-133	2016-03-16
24	4	29.3	29	5.87	4.21	1.71991	1.23353	2.95344	615	-132	2016-03-17
24	4	29.5	29.3667	5.95	4.18	1.75525	1.2331	2.98835	629	-131	2016-03-18
24	4	29.3	29.7667	5.71	4.15	1.67303	1.21595	2.88898	596	-130	2016-03-19
24	4	30.5	29.9	6.24	4.11	1.9032	1.25355	3.15675	595	-129	2016-03-20
24	4	29.9	30.3	6.01	4.18	1.79699	1.24982	3.04681	618	-128	2016-03-21
24	4	30.5	30.3	5.58	4.17	1.7019	1.27185	2.97375	615	-127	2016-03-22
24	4	30.5	30.5333	5.53	4.1	1.68665	1.2505	2.93715	627	-126	2016-03-23
24	4	30.6	30.4333	5.57	4.08	1.70442	1.24848	2.9529	627	-125	2016-03-24
24	4	30.2	30.0667	5.7	4.07	1.7214	1.22914	2.95054	630	-124	2016-03-25
24	4	29.4	29.7	5.4	4.03	1.5876	1.18482	2.77242	616	-123	2016-03-26
24	4	29.5	29.6333	5.64	4.01	1.6638	1.18295	2.84675	613	-122	2016-03-27
24	4	30	29.8667	5.56	4.07	1.668	1.221	2.889	616	-121	2016-03-28
24	4	30.1	30.2333	5.65	4.07	1.70065	1.22507	2.92572	617	-120	2016-03-29
24	4	30.6	30.6	5.51	4.1	1.68606	1.2546	2.94066	628	-119	2016-03-30
24	4	31.1	30.8333	5.39	4.1	1.67629	1.2751	2.95139	629	-118	2016-03-31
24	4	30.8	30.5667	5.38	4.1	1.65704	1.2628	2.91984	630	-117	2016-04-01
24	4	29.8	30.2333	6.13	4.1	1.82674	1.2218	3.04854	628	-116	2016-04-02
24	4	30.1	29.2333	5.94	4.04	1.78794	1.21604	3.00398	683	-115	2016-04-03
24	4	27.8	29.0333	5.55	4.03	1.5429	1.12034	2.66324	626	-114	2016-04-04
24	4	29.2	29.1667	5.66	3.9	1.65272	1.1388	2.79152	634	-113	2016-04-05
24	4	30.5	30.1333	4.7	3.83	1.4335	1.16815	2.60165	629	-112	2016-04-06
24	4	30.7	30.5667	5.62	4.01	1.72534	1.23107	2.95641	638	-111	2016-04-07
24	4	30.5	30.0333	5.74	4	1.7507	1.22	2.9707	634	-110	2016-04-08
24	4	28.9	29.4667	5.09	3.94	1.47101	1.13866	2.60967	593	-109	2016-04-09
24	4	29	29.0333	6.09	3.88	1.7661	1.1252	2.8913	605	-108	2016-04-10
24	4	29.2	28.7667	5.39	3.92	1.57388	1.14464	2.71852	636	-107	2016-04-11
24	4	28.1	29.1	5.25	3.89	1.47525	1.09309	2.56834	619	-106	2016-04-12
24	4	30	29.7	5.07	3.72	1.521	1.116	2.637	621	-105	2016-04-13
24	4	31	30.7	5.05	3.69	1.5655	1.1439	2.7094	589	-104	2016-04-14
24	4	31.1	30.9667	5.18	3.68	1.61098	1.14448	2.75546	592	-103	2016-04-15
24	4	30.8	31.0667	5.26	3.82	1.62008	1.17656	2.79664	593	-102	2016-04-16
24	4	31.3	31.2333	5.81	3.95	1.81853	1.23635	3.05488	589	-101	2016-04-17
24	4	31.6	31.2667	5.3	3.96	1.6748	1.25136	2.92616	604	-100	2016-04-18
24	4	30.9	30.9	5.56	4	1.71804	1.236	2.95404	599	-99	2016-04-19
24	4	30.2	30.2667	5.59	4.02	1.68818	1.21404	2.90222	601	-98	2016-04-20
24	4	29.7	29.8667	5.55	3.97	1.64835	1.17909	2.82744	598	-97	2016-04-21
24	4	29.7	29.6333	5.49	3.92	1.63053	1.16424	2.79477	611	-96	2016-04-22
24	4	29.5	29.7333	5.81	3.92	1.71395	1.1564	2.87035	615	-95	2016-04-23
24	4	30	28.9333	5.86	3.98	1.758	1.194	2.952	668	-94	2016-04-24
24	4	27.3	28.7667	5.42	4.05	1.47966	1.10565	2.58531	616	-93	2016-04-25
24	4	29	27.8	5.4	4.03	1.566	1.1687	2.7347	621	-92	2016-04-26
24	4	27.1	28.3333	5.76	3.98	1.56096	1.07858	2.63954	622	-91	2016-04-27
24	4	28.9	28.8333	5.97	3.87	1.72533	1.11843	2.84376	624	-90	2016-04-28
24	4	30.5	29.4	5.89	3.88	1.79645	1.1834	2.97985	624	-89	2016-04-29
24	4	28.8	29.5	5.87	3.97	1.69056	1.14336	2.83392	629	-88	2016-04-30
24	4	29.2	29	5.76	4	1.68192	1.168	2.84992	614	-87	2016-05-01
24	4	29	29.3667	5.47	3.95	1.5863	1.1455	2.7318	618	-86	2016-05-02
24	4	29.9	29.8	5.72	3.95	1.71028	1.18105	2.89133	599	-85	2016-05-03
24	4	30.5	30.7667	5.47	4	1.66835	1.22	2.88835	613	-84	2016-05-04
24	4	31.9	31.1333	5.9	3.98	1.8821	1.26962	3.15172	613	-83	2016-05-05
24	4	31	30.9	5.57	3.97	1.7267	1.2307	2.9574	617	-82	2016-05-06
24	4	29.8	29.7	6	4.04	1.788	1.20392	2.99192	616	-81	2016-05-07
24	4	28.3	29.4333	6.51	4.07	1.84233	1.15181	2.99414	616	-80	2016-05-08
24	4	30.2	29.7667	5.87	3.93	1.77274	1.18686	2.9596	612	-79	2016-05-09
24	4	30.8	30.4333	5.68	4.01	1.74944	1.23508	2.98452	615	-78	2016-05-10
24	4	30.3	30.3	5.63	4.06	1.70589	1.23018	2.93607	626	-77	2016-05-11
24	4	29.8	30.0667	5.63	4.09	1.67774	1.21882	2.89656	615	-76	2016-05-12
24	4	30.1	29.9333	6.08	4.13	1.83008	1.24313	3.07321	610	-75	2016-05-13
24	4	29.9	29.5333	6.17	4.11	1.84483	1.22889	3.07372	619	-74	2016-05-14
24	4	28.6	28.9	5.68	4.02	1.62448	1.14972	2.7742	621	-73	2016-05-15
24	4	28.2	27.7667	5.59	3.99	1.57638	1.12518	2.70156	617	-72	2016-05-16
24	4	26.5	27.6333	5.48	4	1.4522	1.06	2.5122	574	-71	2016-05-17
24	4	28.2	27.9	5.91	3.8	1.66662	1.0716	2.73822	592	-70	2016-05-18
24	4	29	28.1	5.52	3.91	1.6008	1.1339	2.7347	605	-69	2016-05-19
24	4	27.1	27.9667	5.78	3.96	1.56638	1.07316	2.63954	607	-68	2016-05-20
24	4	27.8	28.3	5.91	3.93	1.64298	1.09254	2.73552	621	-67	2016-05-21
24	4	30	29.1	5.79	3.85	1.737	1.155	2.892	617	-66	2016-05-22
24	4	29.5	29.7667	5.76	3.87	1.6992	1.14165	2.84085	614	-65	2016-05-23
24	4	29.8	29.2	5.33	3.93	1.58834	1.17114	2.75948	618	-64	2016-05-24
24	4	28.3	28.8667	5.6	3.99	1.5848	1.12917	2.71397	613	-63	2016-05-25
24	4	28.5	29.1667	5.61	3.98	1.59885	1.1343	2.73315	617	-62	2016-05-26
24	4	30.7	29.2667	5.48	3.92	1.68236	1.20344	2.8858	629	-61	2016-05-27
24	4	28.6	29.1	5.71	4.01	1.63306	1.14686	2.77992	612	-60	2016-05-28
24	4	28	28.3	5.8	4.08	1.624	1.1424	2.7664	616	-59	2016-05-29
24	4	28.3	29.2667	5.51	4.01	1.55933	1.13483	2.69416	631	-58	2016-05-30
24	4	31.5	29.6	5.76	3.95	1.8144	1.24425	3.05865	628	-57	2016-05-31
24	4	29	29.4	5.69	3.98	1.6501	1.1542	2.8043	635	-56	2016-06-01
24	4	27.7	27.5667	6.24	4.02	1.72848	1.11354	2.84202	605	-55	2016-06-02
24	4	26	26.7333	6.17	3.99	1.6042	1.0374	2.6416	604	-54	2016-06-03
24	4	26.5	25.8333	6.14	3.9	1.6271	1.0335	2.6606	609	-53	2016-06-04
24	4	25	26.0667	6.04	3.83	1.51	0.9575	2.4675	606	-52	2016-06-05
24	4	26.7	25.3	5.98	3.85	1.59666	1.02795	2.62461	596	-51	2016-06-06
24	4	24.2	25	6.02	4.02	1.45684	0.97284	2.42968	589	-50	2016-06-07
24	4	24.1	24.3	5.94	4.1	1.43154	0.9881	2.41964	581	-49	2016-06-08
24	4	24.6	25	6.38	4.05	1.56948	0.9963	2.56578	594	-48	2016-06-09
24	4	26.3	25.9	6	4.09	1.578	1.07567	2.65367	604	-47	2016-06-10
24	4	26.8	26.6333	5.72	4.13	1.53296	1.10684	2.6398	604	-46	2016-06-11
24	4	26.8	26.7333	5.69	4.13	1.52492	1.10684	2.63176	613	-45	2016-06-12
24	4	26.6	27.4333	5.7	4.13	1.5162	1.09858	2.61478	609	-44	2016-06-13
24	4	28.9	27.7	5.83	4.03	1.68487	1.16467	2.84954	609	-43	2016-06-14
24	4	27.6	28.0667	5.9	4.07	1.6284	1.12332	2.75172	618	-42	2016-06-15
24	4	27.7	27.1667	5.47	4.02	1.51519	1.11354	2.62873	608	-41	2016-06-16
24	4	26.2	27.3667	5.54	4.02	1.45148	1.05324	2.50472	611	-40	2016-06-17
24	4	28.2	27.9	5.58	3.95	1.57356	1.1139	2.68746	607	-39	2016-06-18
24	4	29.3	28.6667	5.69	3.95	1.66717	1.15735	2.82452	605	-38	2016-06-19
24	4	28.5	26.6667	5.81	3.99	1.65585	1.13715	2.793	607	-37	2016-06-20
24	4	22.2	26.8667	5.67	3.97	1.25874	0.88134	2.14008	605	-36	2016-06-21
24	4	29.9	27.2333	5.6	3.94	1.6744	1.17806	2.85246	606	-35	2016-06-22
24	4	29.6	29.8	5.52	3.94	1.63392	1.16624	2.80016	616	-34	2016-06-23
24	4	29.9	30.2333	5.61	3.95	1.67739	1.18105	2.85844	610	-33	2016-06-24
24	4	31.2	30.4667	5.35	3.92	1.6692	1.22304	2.89224	609	-32	2016-06-25
24	4	30.3	29.3667	5.72	3.93	1.73316	1.19079	2.92395	592	-31	2016-06-26
24	4	26.6	28.8	5.64	3.86	1.50024	1.02676	2.527	595	-30	2016-06-27
24	4	29.5	28.6667	5.91	3.72	1.74345	1.0974	2.84085	605	-29	2016-06-28
24	4	29.9	29.7333	5.35	3.7	1.59965	1.1063	2.70595	609	-28	2016-06-29
24	4	29.8	29.8333	5.09	3.7	1.51682	1.1026	2.61942	609	-27	2016-06-30
24	4	29.8	30.2667	5.06	3.64	1.50788	1.08472	2.5926	616	-26	2016-07-01
24	4	31.2	30.6667	5.29	3.65	1.65048	1.1388	2.78928	611	-25	2016-07-02
24	4	31	31.1333	5.62	3.69	1.7422	1.1439	2.8861	619	-24	2016-07-03
24	4	31.2	31.1333	5.53	3.69	1.72536	1.15128	2.87664	603	-23	2016-07-04
24	4	31.2	31.7333	5.28	3.7	1.64736	1.1544	2.80176	601	-22	2016-07-05
24	4	32.8	32.0667	5.41	3.68	1.77448	1.20704	2.98152	613	-21	2016-07-06
24	4	32.2	32.4	5.53	3.71	1.78066	1.19462	2.97528	647	-20	2016-07-07
24	4	32.2	31.9333	5.28	3.7	1.70016	1.1914	2.89156	616	-19	2016-07-08
24	4	31.4	31.4667	5.54	3.73	1.73956	1.17122	2.91078	615	-18	2016-07-09
24	4	30.8	31.0667	5.58	3.75	1.71864	1.155	2.87364	615	-17	2016-07-10
24	4	31	30.6	5.34	3.72	1.6554	1.1532	2.8086	625	-16	2016-07-11
24	4	30	30.3333	5.76	3.77	1.728	1.131	2.859	607	-15	2016-07-12
24	4	30	30.6667	5.48	3.7	1.644	1.11	2.754	614	-14	2016-07-13
24	4	32	31.5667	5.57	3.68	1.7824	1.1776	2.96	606	-13	2016-07-14
24	4	32.7	31.8667	5.22	3.7	1.70694	1.2099	2.91684	613	-12	2016-07-15
24	4	30.9	31.7	5.54	3.75	1.71186	1.15875	2.87061	610	-11	2016-07-16
24	4	31.5	30.7	6.25	3.71	1.96875	1.16865	3.1374	607	-10	2016-07-17
24	4	29.7	30	5.4	3.66	1.6038	1.08702	2.69082	596	-9	2016-07-18
24	4	28.8	29.7	5.59	3.61	1.60992	1.03968	2.6496	585	-8	2016-07-19
24	4	30.6	30.1333	5.55	3.58	1.6983	1.09548	2.79378	604	-7	2016-07-20
24	4	31	31.0667	5.7	3.61	1.767	1.1191	2.8861	609	-6	2016-07-21
24	4	31.6	31.4333	5.43	3.55	1.71588	1.1218	2.83768	610	-5	2016-07-22
24	4	31.7	32.3333	5.25	3.58	1.66425	1.13486	2.79911	613	-4	2016-07-23
24	4	33.7	32.2	5.49	3.66	1.85013	1.23342	3.08355	612	-3	2016-07-24
24	4	31.2	32.6333	5.61	3.7	1.75032	1.1544	2.90472	613	-2	2016-07-25
24	4	33	32.0333	5.65	3.67	1.8645	1.2111	3.0756	583	-1	2016-07-26
24	4	31.9	32.6667	5.57	3.69	1.77683	1.17711	2.95394	605	0	2016-07-27
24	4	33.1	32.0333	5.51	3.67	1.82381	1.21477	3.03858	601	1	2016-07-28
24	4	31.1	31.8333	5.22	3.71	1.62342	1.15381	2.77723	617	2	2016-07-29
24	4	31.3	30.7	5.37	3.8	1.68081	1.1894	2.87021	625	3	2016-07-30
24	4	29.7	30.2333	5.51	3.85	1.63647	1.14345	2.77992	604	4	2016-07-31
24	4	29.7	29.7667	5.72	3.85	1.69884	1.14345	2.84229	603	5	2016-08-01
24	4	29.9	29.7667	5.8	3.88	1.7342	1.16012	2.89432	637	6	2016-08-02
24	4	29.7	29.8	5.71	3.82	1.69587	1.13454	2.83041	637	7	2016-08-03
24	4	29.8	29.7333	5.77	3.84	1.71946	1.14432	2.86378	608	8	2016-08-04
24	4	29.7	29.6	5.49	3.86	1.63053	1.14642	2.77695	603	9	2016-08-05
24	4	29.3	28.8	6.26	3.87	1.83418	1.13391	2.96809	602	10	2016-08-06
24	4	27.4	28.0333	5.96	3.88	1.63304	1.06312	2.69616	601	11	2016-08-07
24	4	27.4	28.0667	6.29	3.86	1.72346	1.05764	2.7811	599	12	2016-08-08
24	4	29.4	28.7	6.36	3.77	1.86984	1.10838	2.97822	618	13	2016-08-09
24	4	29.3	29.2667	6.19	3.84	1.81367	1.12512	2.93879	600	14	2016-08-10
24	4	29.1	30.0333	5.78	3.8	1.68198	1.1058	2.78778	611	15	2016-08-11
24	4	31.7	30.1333	5.96	3.89	1.88932	1.23313	3.12245	620	16	2016-08-12
24	4	29.6	30.3	5.87	3.92	1.73752	1.16032	2.89784	621	17	2016-08-13
24	4	29.6	29.2667	6.15	3.88	1.8204	1.14848	2.96888	617	18	2016-08-14
24	4	28.6	28.6667	6.18	3.89	1.76748	1.11254	2.88002	614	19	2016-08-15
24	4	27.8	28.0333	5.89	3.81	1.63742	1.05918	2.6966	620	20	2016-08-16
24	4	27.7	27.8333	5.65	3.74	1.56505	1.03598	2.60103	621	21	2016-08-17
24	4	28	28.1	5.73	3.72	1.6044	1.0416	2.646	620	22	2016-08-18
24	4	28.6	28.6333	5.73	3.74	1.63878	1.06964	2.70842	610	23	2016-08-19
24	4	29.3	29.2667	5.45	3.72	1.59685	1.08996	2.68681	601	24	2016-08-20
24	4	29.9	29.6	5.41	3.66	1.61759	1.09434	2.71193	608	25	2016-08-21
24	4	29.6	29.8667	5.67	3.74	1.67832	1.10704	2.78536	616	26	2016-08-22
24	4	30.1	29.9667	5.63	3.77	1.69463	1.13477	2.8294	614	27	2016-08-23
24	4	30.2	30	5.91	3.84	1.78482	1.15968	2.9445	616	28	2016-08-24
24	4	29.7	30.2	5.75	3.82	1.70775	1.13454	2.84229	631	29	2016-08-25
24	4	30.7	30	6.05	3.78	1.85735	1.16046	3.01781	618	30	2016-08-26
24	4	29.6	29.5	6.2	3.77	1.8352	1.11592	2.95112	607	31	2016-08-27
24	4	28.2	28.2	5.47	3.67	1.54254	1.03494	2.57748	600	32	2016-08-28
24	4	26.8	27.8333	6.33	3.6	1.69644	0.9648	2.66124	592	33	2016-08-29
24	4	28.5	27.9667	5.91	3.59	1.68435	1.02315	2.7075	597	34	2016-08-30
24	4	28.6	28.1333	5.82	3.66	1.66452	1.04676	2.71128	596	35	2016-08-31
24	4	27.3	27.9	5.68	3.63	1.55064	0.99099	2.54163	606	36	2016-09-01
24	4	27.8	27.8	5.89	3.6	1.63742	1.0008	2.63822	601	37	2016-09-02
24	4	28.3	28.0667	6.01	3.54	1.70083	1.00182	2.70265	605	38	2016-09-03
24	4	28.1	28.0333	5.62	3.48	1.57922	0.97788	2.5571	599	39	2016-09-04
24	4	27.7	27.8333	5.85	3.55	1.62045	0.98335	2.6038	608	40	2016-09-05
24	4	27.7	27.4	5.89	3.54	1.63153	0.98058	2.61211	606	41	2016-09-06
24	4	26.8	26.9	5.89	3.55	1.57852	0.9514	2.52992	605	42	2016-09-07
24	4	26.2	26.5667	5.6	3.48	1.4672	0.91176	2.37896	601	43	2016-09-08
24	4	26.7	26.6	5.82	3.48	1.55394	0.92916	2.4831	607	44	2016-09-09
24	4	26.9	26.8	5.64	3.47	1.51716	0.93343	2.45059	608	45	2016-09-10
24	4	26.8	26.9667	5.72	3.53	1.53296	0.94604	2.479	588	46	2016-09-11
24	4	27.2	27.5333	5.83	3.48	1.58576	0.94656	2.53232	603	47	2016-09-12
24	4	28.6	27.4333	5.63	3.56	1.61018	1.01816	2.62834	602	48	2016-09-13
24	4	26.5	27.6333	6.07	3.59	1.60855	0.95135	2.5599	600	49	2016-09-14
24	4	27.8	26.3333	6.09	3.56	1.69302	0.98968	2.6827	606	50	2016-09-15
24	4	24.7	25.9667	5.98	3.56	1.47706	0.87932	2.35638	614	51	2016-09-16
24	4	25.4	25.0333	6.09	3.5	1.54686	0.889	2.43586	615	52	2016-09-17
24	4	25	24.7333	5.75	3.55	1.4375	0.8875	2.325	583	53	2016-09-18
24	4	23.8	24.1	5.78	3.48	1.37564	0.82824	2.20388	581	54	2016-09-19
24	4	23.5	24.2	6.22	3.32	1.4617	0.7802	2.2419	591	55	2016-09-20
24	4	25.3	24.9	5.85	3.38	1.48005	0.85514	2.33519	589	56	2016-09-21
24	4	25.9	25.2333	5.41	3.3	1.40119	0.8547	2.25589	598	57	2016-09-22
24	4	24.5	25.1333	5.02	3.15	1.2299	0.77175	2.00165	593	58	2016-09-23
24	4	25	23.8	5.18	3.15	1.295	0.7875	2.0825	609	59	2016-09-24
24	4	21.9	23	5.11	3.17	1.11909	0.69423	1.81332	621	60	2016-09-25
24	4	22.1	21.8	5.56	3.15	1.22876	0.69615	1.92491	601	61	2016-09-26
24	4	21.4	22.2	5.54	3.11	1.18556	0.66554	1.8511	598	62	2016-09-27
24	4	23.1	22.8	5.54	3.12	1.27974	0.72072	2.00046	590	63	2016-09-28
24	4	23.9	23.8667	5.21	3.04	1.24519	0.72656	1.97175	589	64	2016-09-29
24	4	24.6	24.3667	5.68	3.01	1.39728	0.74046	2.13774	584	65	2016-09-30
24	4	24.6	25.3	5.36	3.09	1.31856	0.76014	2.0787	637	66	2016-10-01
24	4	26.7	26.0333	4.99	3.21	1.33233	0.85707	2.1894	622	67	2016-10-02
24	4	26.8	26.5667	4.86	3.2	1.30248	0.8576	2.16008	633	68	2016-10-03
24	4	26.2	26.7667	5.03	3.27	1.31786	0.85674	2.1746	626	69	2016-10-04
24	4	27.3	27.1667	5.27	3.41	1.43871	0.93093	2.36964	624	70	2016-10-05
24	4	28	28.3667	5.17	3.49	1.4476	0.9772	2.4248	626	71	2016-10-06
24	4	29.8	28.2667	4.85	3.59	1.4453	1.06982	2.51512	627	72	2016-10-07
24	4	27	27.9667	4.56	3.56	1.2312	0.9612	2.1924	627	73	2016-10-08
24	4	27.1	26.5667	4.87	3.55	1.31977	0.96205	2.28182	630	74	2016-10-09
24	4	25.6	26.0667	5.08	3.52	1.30048	0.90112	2.2016	623	75	2016-10-10
24	4	25.5	25.0667	4.82	3.48	1.2291	0.8874	2.1165	621	76	2016-10-11
24	4	24.1	24.8667	4.72	3.43	1.13752	0.82663	1.96415	615	77	2016-10-12
24	4	25	24.8333	5.01	3.4	1.2525	0.85	2.1025	626	78	2016-10-13
24	4	25.4	25.7	5.53	3.38	1.40462	0.85852	2.26314	636	79	2016-10-14
24	4	26.7	25.9	5.12	3.39	1.36704	0.90513	2.27217	641	80	2016-10-15
24	4	25.6	26.3333	5.19	3.46	1.32864	0.88576	2.2144	635	81	2016-10-16
24	4	26.7	26.4	4.88	3.46	1.30296	0.92382	2.22678	637	82	2016-10-17
24	4	26.9	25.8	4.65	3.38	1.25085	0.90922	2.16007	635	83	2016-10-18
24	4	23.8	24.6667	4.77	3.3	1.13526	0.7854	1.92066	619	84	2016-10-19
24	4	23.3	24.2333	4.98	3.25	1.16034	0.75725	1.91759	603	85	2016-10-20
24	4	25.6	25.3667	5.01	3.2	1.28256	0.8192	2.10176	620	86	2016-10-21
24	4	27.2	26.4	4.77	3.22	1.29744	0.87584	2.17328	635	87	2016-10-22
24	4	26.4	26.3	4.56	3.22	1.20384	0.85008	2.05392	635	88	2016-10-23
24	4	25.3	26	4.73	3.19	1.19669	0.80707	2.00376	628	89	2016-10-24
24	4	26.3	25.8667	4.59	3.19	1.20717	0.83897	2.04614	634	90	2016-10-25
24	4	26	26.2667	4.68	3.26	1.2168	0.8476	2.0644	636	91	2016-10-26
24	4	26.5	26.6333	4.82	3.24	1.2773	0.8586	2.1359	615	92	2016-10-27
24	4	27.4	27.3667	4.77	3.26	1.30698	0.89324	2.20022	617	93	2016-10-28
24	4	28.2	27.0333	4.95	3.33	1.3959	0.93906	2.33496	631	94	2016-10-29
24	4	25.5	26.6667	5.26	3.35	1.3413	0.85425	2.19555	622	95	2016-10-30
24	4	26.3	26.0333	5.25	3.41	1.38075	0.89683	2.27758	612	96	2016-10-31
24	4	26.3	26.3667	4.81	3.4	1.26503	0.8942	2.15923	636	97	2016-11-01
24	4	26.5	26.3	5.17	3.38	1.37005	0.8957	2.26575	620	98	2016-11-02
24	4	26.1	26.1	5.03	3.44	1.31283	0.89784	2.21067	644	99	2016-11-03
24	4	25.7	25.6333	5.49	3.53	1.41093	0.90721	2.31814	632	100	2016-11-04
24	4	25.1	25.2667	5.07	3.59	1.27257	0.90109	2.17366	625	101	2016-11-05
24	4	25	25	5.31	3.66	1.3275	0.915	2.2425	633	102	2016-11-06
24	4	24.9	25.2	5.14	3.64	1.27986	0.90636	2.18622	629	103	2016-11-07
24	4	25.7	25.0333	5.02	3.61	1.29014	0.92777	2.21791	633	104	2016-11-08
24	4	24.5	24.8	5.46	3.64	1.3377	0.8918	2.2295	629	105	2016-11-09
24	4	24.2	24.3667	5.75	3.71	1.3915	0.89782	2.28932	623	106	2016-11-10
24	4	24.4	24.1	5.61	3.74	1.36884	0.91256	2.2814	634	107	2016-11-11
24	4	23.7	24.3667	5.77	3.71	1.36749	0.87927	2.24676	628	108	2016-11-12
24	4	25	24.9667	5.32	3.67	1.33	0.9175	2.2475	639	109	2016-11-13
24	4	26.2	24.6333	5.84	3.78	1.53008	0.99036	2.52044	633	110	2016-11-14
24	4	22.7	23.7333	5.55	3.95	1.25985	0.89665	2.1565	629	111	2016-11-15
24	4	22.3	23.2667	5.42	3.95	1.20866	0.88085	2.08951	642	112	2016-11-16
24	4	24.8	23.0667	5.53	3.78	1.37144	0.93744	2.30888	634	113	2016-11-17
24	4	22.1	23.7333	5.86	3.82	1.29506	0.84422	2.13928	632	114	2016-11-18
24	4	24.3	23.4	5.79	3.77	1.40697	0.91611	2.32308	637	115	2016-11-19
24	4	23.8	24.1667	5.65	3.79	1.3447	0.90202	2.24672	636	116	2016-11-20
24	4	24.4	24.0333	5.45	3.85	1.3298	0.9394	2.2692	622	117	2016-11-21
24	4	23.9	24.2667	5.46	3.83	1.30494	0.91537	2.22031	638	118	2016-11-22
24	4	24.5	24.2333	5.88	3.83	1.4406	0.93835	2.37895	627	119	2016-11-23
24	4	24.3	24.2	5.38	3.85	1.30734	0.93555	2.24289	630	120	2016-11-24
24	4	23.8	23.8333	5.59	3.85	1.33042	0.9163	2.24672	638	121	2016-11-25
24	4	23.4	23.6333	5.66	3.76	1.32444	0.87984	2.20428	633	122	2016-11-26
24	4	23.7	23.5333	5.69	3.8	1.34853	0.9006	2.24913	634	123	2016-11-27
24	4	23.5	24.0667	5.61	3.85	1.31835	0.90475	2.2231	628	124	2016-11-28
24	4	25	24.1667	4.92	3.95	1.23	0.9875	2.2175	639	125	2016-11-29
24	4	24	24.5667			0	0	0	633	126	2016-11-30
24	4	24.7	24.5333			0	0	0	640	127	2016-12-01
24	4	24.9	23.9667	5.87	3.97	1.46163	0.98853	2.45016	631	128	2016-12-02
24	4	22.3	23.7	5.83	3.99	1.30009	0.88977	2.18986	634	129	2016-12-03
24	4	23.9	22.8667	5.91	3.99	1.41249	0.95361	2.3661	621	130	2016-12-04
24	4	22.4	22.6333	5.62	3.94	1.25888	0.88256	2.14144	642	131	2016-12-05
24	4	21.6	21.6667	6.13	4.01	1.32408	0.86616	2.19024	632	132	2016-12-06
24	4	21	21.1667	6.02	3.89	1.2642	0.8169	2.0811	634	133	2016-12-07
24	4	20.9	21.3667	6.2	3.87	1.2958	0.80883	2.10463	628	134	2016-12-08
24	4	22.2	21.2667	6.1	3.88	1.3542	0.86136	2.21556	627	135	2016-12-09
24	4	20.7	21.9333	5.6	3.86	1.1592	0.79902	1.95822	640	136	2016-12-10
24	4	22.9	21.8	6.28	3.91	1.43812	0.89539	2.33351	630	137	2016-12-11
24	4	21.8	22.4333	6.3	3.94	1.3734	0.85892	2.23232	635	138	2016-12-12
24	4	22.6	21.9333	5.65	3.85	1.2769	0.8701	2.147	634	139	2016-12-13
24	4	21.4	21.4333	5.78	3.88	1.23692	0.83032	2.06724	647	140	2016-12-14
24	4	20.3	21.4333	5.93	3.87	1.20379	0.78561	1.9894	638	141	2016-12-15
24	4	22.6	21.7667	5.47	3.82	1.23622	0.86332	2.09954	645	142	2016-12-16
24	4	22.4	22.5	5.6	3.8	1.2544	0.8512	2.1056	631	143	2016-12-17
24	4	22.5	22.0667	5.58	3.87	1.2555	0.87075	2.12625	646	144	2016-12-18
24	4	21.3	21.4667	5.94	3.94	1.26522	0.83922	2.10444	639	145	2016-12-19
24	4	20.6	21.3667	5.63	3.84	1.15978	0.79104	1.95082	640	146	2016-12-20
24	4	22.2	20.8667	5.6	3.79	1.2432	0.84138	2.08458	638	147	2016-12-21
24	4	19.8	21.7667	5.68	3.82	1.12464	0.75636	1.881	637	148	2016-12-22
24	4	23.3	21.8667	5.86	3.75	1.36538	0.87375	2.23913	647	149	2016-12-23
24	4	22.5	23.2333	5.31	3.75	1.19475	0.84375	2.0385	644	150	2016-12-24
24	4	23.9	22.9667	5.37	3.74	1.28343	0.89386	2.17729	646	151	2016-12-25
24	4	22.5	22.5333	5.37	3.74	1.20825	0.8415	2.04975	648	152	2016-12-26
24	4	21.2	22.1667	5.28	3.77	1.11936	0.79924	1.9186	642	153	2016-12-27
24	4	22.8	22.7333	5.46	3.73	1.24488	0.85044	2.09532	636	154	2016-12-28
24	4	24.2	23.4	5.36	3.69	1.29712	0.89298	2.1901	647	155	2016-12-29
24	4	23.2	24.2	5.08	3.68	1.17856	0.85376	2.03232	644	156	2016-12-30
24	4	25.2	23.8333	5.26	3.73	1.32552	0.93996	2.26548	642	157	2016-12-31
24	4	23.1	23.8667	5.51	3.8	1.27281	0.8778	2.15061	649	158	2017-01-01
24	4	23.3	23.8	5.52	3.82	1.28616	0.89006	2.17622	639	159	2017-01-02
24	4	25	23.1333	5.46	3.77	1.365	0.9425	2.3075	640	160	2017-01-03
24	4	21.1	22.9	5.23	3.73	1.10353	0.78703	1.89056	637	161	2017-01-04
24	4	22.6	22.2667	5.15	3.67	1.1639	0.82942	1.99332	645	162	2017-01-05
24	4	23.1	22.6333	5.41	3.68	1.24971	0.85008	2.09979	640	163	2017-01-06
24	4	22.2	23	4.79	3.6	1.06338	0.7992	1.86258	648	164	2017-01-07
24	4	23.7	22.9667	5.05	3.65	1.19685	0.86505	2.0619	647	165	2017-01-08
24	4	23	23.2	5.37	3.66	1.2351	0.8418	2.0769	652	166	2017-01-09
24	4	22.9	22.9667	5.34	3.7	1.22286	0.8473	2.07016	651	167	2017-01-10
24	4	23	22.7667	5.06	3.61	1.1638	0.8303	1.9941	657	168	2017-01-11
24	4	22.4	22.7667	5.15	3.68	1.1536	0.82432	1.97792	655	169	2017-01-12
24	4	22.9	22.7	5.33	3.66	1.22057	0.83814	2.05871	652	170	2017-01-13
24	4	22.8	22.7667	5.46	3.66	1.24488	0.83448	2.07936	654	171	2017-01-14
24	4	22.6	23	5.51	3.69	1.24526	0.83394	2.0792	652	172	2017-01-15
24	4	23.6	23	5.45	3.72	1.2862	0.87792	2.16412	645	173	2017-01-16
24	4	22.8	22.9333	5.5	3.73	1.254	0.85044	2.10444	640	174	2017-01-17
24	4	22.4	23.0667	5.49	3.73	1.22976	0.83552	2.06528	629	175	2017-01-18
24	4	24	23.0667	5.51	3.72	1.3224	0.8928	2.2152	636	176	2017-01-19
24	4	22.8	23.9333	5.2	3.64	1.1856	0.82992	2.01552	648	177	2017-01-20
24	4	25	23.7667	5.15	3.64	1.2875	0.91	2.1975	639	178	2017-01-21
24	4	23.5	23.2667	5.18	3.66	1.2173	0.8601	2.0774	629	179	2017-01-22
24	4	21.3	22.5333	5.25	3.64	1.11825	0.77532	1.89357	620	180	2017-01-23
24	4	22.8	22.6333	5.25	3.47	1.197	0.79116	1.98816	635	181	2017-01-24
24	4	23.8	23.3333	5.22	3.47	1.24236	0.82586	2.06822	633	182	2017-01-25
24	4	23.4	23.4333	5.27	3.55	1.23318	0.8307	2.06388	609	183	2017-01-26
24	4	23.1	24.1333	5.3	3.64	1.2243	0.84084	2.06514	633	184	2017-01-27
24	4	25.9	24.8333	5.39	3.67	1.39601	0.95053	2.34654	630	185	2017-01-28
24	4	25.5	25.7	5.3	3.72	1.3515	0.9486	2.3001	639	186	2017-01-29
24	4	25.7	25.6667	4.93	3.74	1.26701	0.96118	2.22819	634	187	2017-01-30
24	4	25.8	25.7	5.2	3.75	1.3416	0.9675	2.3091	652	188	2017-01-31
24	4	25.6	25.2667	5.14	3.76	1.31584	0.96256	2.2784	639	189	2017-02-01
24	4	24.4	25.1333	5.22	3.69	1.27368	0.90036	2.17404	645	190	2017-02-02
24	4	25.4	25.1333	5.18	3.67	1.31572	0.93218	2.2479	647	191	2017-02-03
24	4	25.6	25.4667	5.47	3.72	1.40032	0.95232	2.35264	635	192	2017-02-04
24	4	25.4	25.0333	5.03	3.69	1.27762	0.93726	2.21488	647	193	2017-02-05
24	4	24.1	24.7	5.23	3.68	1.26043	0.88688	2.14731	642	194	2017-02-06
24	4	24.6	24.0333	4.95	3.58	1.2177	0.88068	2.09838	636	195	2017-02-07
24	4	23.4	24.3333	5.26	3.61	1.23084	0.84474	2.07558	640	196	2017-02-08
24	4	25	24.7667	5.26	3.64	1.315	0.91	2.225	644	197	2017-02-09
24	4	25.9	25	4.86	3.57	1.25874	0.92463	2.18337	639	198	2017-02-10
24	4	24.1	25.0667	5.13	3.6	1.23633	0.8676	2.10393	637	199	2017-02-11
24	4	25.2	24.3	5.08	3.59	1.28016	0.90468	2.18484	642	200	2017-02-12
24	4	23.6	24.3	5.46	3.59	1.28856	0.84724	2.1358	652	201	2017-02-13
24	4	24.1	24.1	5.24	3.53	1.26284	0.85073	2.11357	631	202	2017-02-14
24	4	24.6	24.4333	5.18	3.58	1.27428	0.88068	2.15496	647	203	2017-02-15
24	4	24.6	24.6667	5.35	3.58	1.3161	0.88068	2.19678	645	204	2017-02-16
24	4	24.8	24.1667	5.1	3.58	1.2648	0.88784	2.15264	649	205	2017-02-17
24	4	23.1	23.9	5.21	3.6	1.20351	0.8316	2.03511	650	206	2017-02-18
24	4	23.8	24	5.34	3.63	1.27092	0.86394	2.13486	653	207	2017-02-19
24	4	25.1	24.3333	5.17	3.63	1.29767	0.91113	2.2088	658	208	2017-02-20
24	4	24.1	24.0333	5.07	3.59	1.22187	0.86519	2.08706	658	209	2017-02-21
24	4	22.9	23	5.55	3.61	1.27095	0.82669	2.09764	653	210	2017-02-22
24	4	22	22.2	5.71	3.61	1.2562	0.7942	2.0504	644	211	2017-02-23
24	4	21.7	21.9667	5.56	3.64	1.20652	0.78988	1.9964	652	212	2017-02-24
24	4	22.2	22.1	5.7	3.63	1.2654	0.80586	2.07126	641	213	2017-02-25
24	4	22.4	21.6	5.44	3.57	1.21856	0.79968	2.01824	654	214	2017-02-26
24	4	20.2	21.4667	5.25	3.71	1.0605	0.74942	1.80992	660	215	2017-02-27
24	4	21.8	21.1667	5.86	3.99	1.27748	0.86982	2.1473	660	216	2017-02-28
24	4	21.5	22	6.29	4	1.35235	0.86	2.21235	658	217	2017-03-01
24	4	22.7	21.9	5.84	3.98	1.32568	0.90346	2.22914	655	218	2017-03-02
24	4	21.5	22.2667	5.89	3.98	1.26635	0.8557	2.12205	658	219	2017-03-03
24	4	22.6	21.9333	6.05	3.97	1.3673	0.89722	2.26452	658	220	2017-03-04
24	4	21.7	21.9667	6.2	4.04	1.3454	0.87668	2.22208	672	221	2017-03-05
24	4	21.6	21.9667	5.61	4.05	1.21176	0.8748	2.08656	668	222	2017-03-06
24	4	22.6	22.2333	5.49	4.02	1.24074	0.90852	2.14926	654	223	2017-03-07
24	4	22.5	22.4667	5.86	3.98	1.3185	0.8955	2.214	658	224	2017-03-08
24	4	22.3	22.2333	5.96	3.98	1.32908	0.88754	2.21662	655	225	2017-03-09
24	4	21.9	22.4	5.96	4.01	1.30524	0.87819	2.18343	674	226	2017-03-10
24	4	23	22	6.07	4.07	1.3961	0.9361	2.3322	668	227	2017-03-11
24	4	21.1	22.4	5.97	4.05	1.25967	0.85455	2.11422	655	228	2017-03-12
24	4	23.1	21.8667	5.88	4.06	1.35828	0.93786	2.29614	665	229	2017-03-13
24	4	21.4	21.6333	6.09	4.02	1.30326	0.86028	2.16354	666	230	2017-03-14
24	4	20.4	21	6.1	4.03	1.2444	0.82212	2.06652	681	231	2017-03-15
24	4	21.2	20.0667	6.14	4.05	1.30168	0.8586	2.16028	678	232	2017-03-16
24	4	18.6	20.2333	6.18	4.01	1.14948	0.74586	1.89534	683	233	2017-03-17
24	4	20.9	19.7333	6.06	3.97	1.26654	0.82973	2.09627	673	234	2017-03-18
24	4	19.7	20.5	6.43	4.03	1.26671	0.79391	2.06062	675	235	2017-03-19
24	4	20.9	19.9	6.26	4.02	1.30834	0.84018	2.14852	670	236	2017-03-20
24	4	19.1	19.6	6.16	4.06	1.17656	0.77546	1.95202	679	237	2017-03-21
24	4	18.8	19.1	6.25	4.08	1.175	0.76704	1.94204	678	238	2017-03-22
24	4	19.4	19.1	6.52	4.08	1.26488	0.79152	2.0564	696	239	2017-03-23
24	4	19.1	18.6	6.28	4.06	1.19948	0.77546	1.97494	672	240	2017-03-24
24	4	17.3	18.1333	6.33	4.06	1.09509	0.70238	1.79747	678	241	2017-03-25
24	4	18	17.7667	6.38	4.05	1.1484	0.729	1.8774	660	242	2017-03-26
24	4	18	17.7	6.22	4.05	1.1196	0.729	1.8486	680	243	2017-03-27
24	4	17.1	17.4667	6.49	4.07	1.10979	0.69597	1.80576	686	244	2017-03-28
24	4	17.3	17.0333	6.48	4.06	1.12104	0.70238	1.82342	681	245	2017-03-29
24	4	16.7	17.0333	6.59	4.02	1.10053	0.67134	1.77187	687	246	2017-03-30
24	4	17.1	17.1667	6.49	3.97	1.10979	0.67887	1.78866	675	247	2017-03-31
24	4	17.7	17.8	6.31	3.97	1.11687	0.70269	1.81956	667	248	2017-04-01
24	4	18.6	17.8	6.17	3.98	1.14762	0.74028	1.8879	680	249	2017-04-02
24	4	17.1	17.6667	6.12	3.99	1.04652	0.68229	1.72881	673	250	2017-04-03
24	4	17.3	16.8	5.95	4.04	1.02935	0.69892	1.72827	679	251	2017-04-04
24	4	16	17.1667	6.04	4.04	0.9664	0.6464	1.6128	667	252	2017-04-05
24	4	18.2	17.2	6.35	4.04	1.1557	0.73528	1.89098	676	253	2017-04-06
24	4	17.4	17.8333	6.24	4.07	1.08576	0.70818	1.79394	687	254	2017-04-07
24	4	17.9	17.7333	6.12	4.08	1.09548	0.73032	1.8258	702	255	2017-04-08
24	4	17.9	17.9667	6.03	4.09	1.07937	0.73211	1.81148	698	256	2017-04-09
24	4	18.1	17.4333	6	4.11	1.086	0.74391	1.82991	681	257	2017-04-10
24	4	16.3	16.5333	6.28	4.2	1.02364	0.6846	1.70824	686	258	2017-04-11
24	4	15.2	15.9333	6.36	4.22	0.96672	0.64144	1.60816	676	259	2017-04-12
24	4	16.3	15.5	6.23	4.21	1.01549	0.68623	1.70172	681	260	2017-04-13
24	4	15	15.2667	6.63	4.25	0.9945	0.6375	1.632	680	261	2017-04-14
24	4	14.5	14.8	6.59	4.2	0.95555	0.609	1.56455	691	262	2017-04-15
24	4	14.9	14.9667	6.58	4.18	0.98042	0.62282	1.60324	694	263	2017-04-16
24	4	15.5	14.7333	6.35	4.15	0.98425	0.64325	1.6275	695	264	2017-04-17
24	4	13.8	14.9	6.37	4.16	0.87906	0.57408	1.45314	680	265	2017-04-18
24	4	15.4	14.4667	6.32	4.17	0.97328	0.64218	1.61546	685	266	2017-04-19
24	4	14.2	14.6	6.55	4.18	0.9301	0.59356	1.52366	683	267	2017-04-20
24	4	14.2	13.8667	6.68	4.15	0.94856	0.5893	1.53786	694	268	2017-04-21
24	4	13.2	13.6333	6.59	4.14	0.86988	0.54648	1.41636	703	269	2017-04-22
24	4	13.5	13.7	6.51	4.21	0.87885	0.56835	1.4472	700	270	2017-04-23
24	4	14.4	13.6333	6.54	4.21	0.94176	0.60624	1.548	693	271	2017-04-24
24	4	13	13.9667	6.65	4.22	0.8645	0.5486	1.4131	689	272	2017-04-25
24	4	14.5	13.5333	6.52	4.22	0.9454	0.6119	1.5573	695	273	2017-04-26
24	4	13.1	13.3667	6.48	4.21	0.84888	0.55151	1.40039	694	274	2017-04-27
24	4	12.5	12.9333	6.76	4.23	0.845	0.52875	1.37375	697	275	2017-04-28
24	4	13.2	12.7	6.76	4.2	0.89232	0.5544	1.44672	702	276	2017-04-29
24	4	12.4	12.4667	7.05	4.2	0.8742	0.5208	1.395	692	277	2017-04-30
24	4	11.8	12.1	7	4.17	0.826	0.49206	1.31806	687	278	2017-05-01
24	4	12.1	11.8333	6.77	4.1	0.81917	0.4961	1.31527	696	279	2017-05-02
24	4	11.6	11.6667	6.63	4.08	0.76908	0.47328	1.24236	701	280	2017-05-03
24	4	11.3	12.0667	6.23	4.07	0.70399	0.45991	1.1639	703	281	2017-05-04
24	4	13.3	12.1333	6.18	4.06	0.82194	0.53998	1.36192	700	282	2017-05-05
24	4	11.8	12.2333	6.14	4.08	0.72452	0.48144	1.20596	691	283	2017-05-06
24	4	11.6	11.5	6.5	4.09	0.754	0.47444	1.22844	726	284	2017-05-07
24	4	11.1	11.2667	6.27	4.1	0.69597	0.4551	1.15107	696	285	2017-05-08
24	4	11.1	10.8	6.43	4.1	0.71373	0.4551	1.16883	687	286	2017-05-09
24	4	10.2	10.7333	6.69	4.15	0.68238	0.4233	1.10568	700	287	2017-05-10
24	4	10.9	10.6667	6.81	4.16	0.74229	0.45344	1.19573	697	288	2017-05-11
24	4	10.9	10.6333	6.79	4.21	0.74011	0.45889	1.199	698	289	2017-05-12
24	4	10.1	10.3667	6.96	4.23	0.70296	0.42723	1.13019	708	290	2017-05-13
24	4	10.1	9.76667	7	4.26	0.707	0.43026	1.13726	696	291	2017-05-14
24	4	9.1	9.43333	6.82	4.24	0.62062	0.38584	1.00646	687	292	2017-05-15
24	4	9.1	9.06667	6.75	4.23	0.61425	0.38493	0.99918	688	293	2017-05-16
24	4	9	8.93333	6.74	4.18	0.6066	0.3762	0.9828	699	294	2017-05-17
24	4	8.7	8.96667	6.58	4.14	0.57246	0.36018	0.93264	701	295	2017-05-18
24	4	9.2	9.03333	6.75	4.16	0.621	0.38272	1.00372	704	296	2017-05-19
24	4	9.2	9.1	6.59	4.19	0.60628	0.38548	0.99176	705	297	2017-05-20
24	4	8.9	9.16667	6.86	4.22	0.61054	0.37558	0.98612	706	298	2017-05-21
24	4	9.4	9.13333	6.77	4.21	0.63638	0.39574	1.03212	714	299	2017-05-22
24	4	9.1	9.36667	6.78	4.22	0.61698	0.38402	1.001	713	300	2017-05-23
24	4	9.6	9.35	6.8	4.22	0.6528	0.40512	1.05792	691	301	2017-05-24
132	2	7	13.3667							-183	2016-01-04
132	2	16.7	15.8667						483	-182	2016-01-05
132	2	16.4	14.9667						464	-181	2016-01-06
132	2	14.5	13.3						459	-180	2016-01-07
132	2	14	12.6667						451	-179	2016-01-08
132	2	11.4	13.2						440	-178	2016-01-09
132	2	12.6	15						445	-177	2016-01-10
132	2	15.6	16.4667						446	-176	2016-01-11
132	2	16.8	17.0333						447	-175	2016-01-12
132	2	17	17.5333						446	-174	2016-01-13
132	2	17.3	17.5333						451	-173	2016-01-14
132	2	18.3	17.5667						455	-172	2016-01-15
132	2	17	17.6	4.43	3.92	0.7531	0.6664	1.4195	458	-171	2016-01-16
132	2	17.4	18.4	4.4	3.87	0.7656	0.67338	1.43898	430	-170	2016-01-17
132	2	18.4	19.2333	4.53	3.83	0.83352	0.70472	1.53824	464	-169	2016-01-18
132	2	19.4	18.5667	4.68	3.77	0.90792	0.73138	1.6393	467	-168	2016-01-19
132	2	19.9	17.7	4.74	3.79	0.94326	0.75421	1.69747	469	-167	2016-01-20
132	2	16.4	17.5333	4.76	3.8	0.78064	0.6232	1.40384	467	-166	2016-01-21
132	2	16.8	18.9333	4.86	3.75	0.81648	0.63	1.44648	442	-165	2016-01-22
132	2	19.4	20.0667	5.21	3.65	1.01074	0.7081	1.71884	454	-164	2016-01-23
132	2	20.6	20.6667	4.68	3.67	0.96408	0.75602	1.7201	450	-163	2016-01-24
132	2	20.2	20.7333	4.57	3.73	0.92314	0.75346	1.6766	520	-162	2016-01-25
132	2	21.2	20.7667	4.53	3.77	0.96036	0.79924	1.7596	457	-161	2016-01-26
132	2	20.8	20.2667	4.34	3.79	0.90272	0.78832	1.69104	460	-160	2016-01-27
132	2	20.3	20.1667	4.41	3.8	0.89523	0.7714	1.66663	453	-159	2016-01-28
132	2	19.7	20.2667	4.29	3.76	0.84513	0.74072	1.58585	462	-158	2016-01-29
132	2	20.5	20.4667	4.29	3.73	0.87945	0.76465	1.6441	474	-157	2016-01-30
132	2	20.6	20.5	4.48	3.71	0.92288	0.76426	1.68714	472	-156	2016-01-31
132	2	20.3	20.6	4.58	3.72	0.92974	0.75516	1.6849	461	-155	2016-02-01
132	2	20.6	20.8667	4.72	3.71	0.97232	0.76426	1.73658	463	-154	2016-02-02
132	2	20.9	20.9333	4.65	3.72	0.97185	0.77748	1.74933	470	-153	2016-02-03
132	2	21.1	21.2667	4.94	3.72	1.04234	0.78492	1.82726	461	-152	2016-02-04
132	2	20.8	21.3	4.62	3.68	0.96096	0.76544	1.7264	474	-151	2016-02-05
132	2	21.9	21.6333	4.48	3.7	0.98112	0.8103	1.79142	456	-150	2016-02-06
132	2	21.2	21.6	4.7	3.68	0.9964	0.78016	1.77656	473	-149	2016-02-07
132	2	21.8	21.5667	4.33	3.68	0.94394	0.80224	1.74618	472	-148	2016-02-08
132	2	21.8	21.4667	4.27	3.7	0.93086	0.8066	1.73746	490	-147	2016-02-09
132	2	21.1	21.2667	4.54	3.65	0.95794	0.77015	1.72809	479	-146	2016-02-10
132	2	21.5	21.5	4.49	3.63	0.96535	0.78045	1.7458	477	-145	2016-02-11
132	2	21.2	21.6333	4.51	3.66	0.95612	0.77592	1.73204	473	-144	2016-02-12
132	2	21.8	21.9	4.73	3.67	1.03114	0.80006	1.8312	467	-143	2016-02-13
132	2	21.9	21.7333	4.87	3.61	1.06653	0.79059	1.85712	476	-142	2016-02-14
132	2	22	21.3	4.46	3.63	0.9812	0.7986	1.7798	474	-141	2016-02-15
132	2	21.3	21.1333	4.53	3.68	0.96489	0.78384	1.74873	470	-140	2016-02-16
132	2	20.6	21.2333	4.53	3.69	0.93318	0.76014	1.69332	460	-139	2016-02-17
132	2	21.5	21.5333	4.48	3.61	0.9632	0.77615	1.73935	483	-138	2016-02-18
132	2	21.6	21.1	4.61	3.63	0.99576	0.78408	1.77984	484	-137	2016-02-19
132	2	21.5	20.9333	4.53	3.64	0.97395	0.7826	1.75655	485	-136	2016-02-20
132	2	20.2	20.5667	4.47	3.64	0.90294	0.73528	1.63822	448	-135	2016-02-21
132	2	21.1	20.3667	4.54	3.63	0.95794	0.76593	1.72387	487	-134	2016-02-22
132	2	20.4	20.4333	4.51	3.63	0.92004	0.74052	1.66056	475	-133	2016-02-23
132	2	19.6	20.4667	4.66	3.64	0.91336	0.71344	1.6268	519	-132	2016-02-24
132	2	21.3	20.3333	4.85	3.63	1.03305	0.77319	1.80624	489	-131	2016-02-25
132	2	20.5	19.5667	4.57	3.71	0.93685	0.76055	1.6974	486	-130	2016-02-26
132	2	19.2	19.2	4.57	3.74	0.87744	0.71808	1.59552	479	-129	2016-02-27
132	2	19	19.3667	4.52	3.73	0.8588	0.7087	1.5675	467	-128	2016-02-28
132	2	19.4	19.5667	4.37	3.62	0.84778	0.70228	1.55006	473	-127	2016-02-29
132	2	19.7	19.4667	4.3	3.66	0.8471	0.72102	1.56812	489	-126	2016-03-01
132	2	19.6	19.4333	4.3	3.72	0.8428	0.72912	1.57192	480	-125	2016-03-02
132	2	19.1	19.3333	4.49	3.62	0.85759	0.69142	1.54901	482	-124	2016-03-03
132	2	19.6	19.0667	4.46	3.65	0.87416	0.7154	1.58956	483	-123	2016-03-04
132	2	19.3	19.1333	4.38	3.72	0.84534	0.71796	1.5633	500	-122	2016-03-05
132	2	18.3	19.3667	4.32	3.77	0.79056	0.68991	1.48047	472	-121	2016-03-06
132	2	19.8	20.0333	4.42	3.7	0.87516	0.7326	1.60776	490	-120	2016-03-07
132	2	20	20.0333	4.53	3.69	0.906	0.738	1.644	472	-119	2016-03-08
132	2	20.3	20.1333	4.44	3.76	0.90132	0.76328	1.6646	483	-118	2016-03-09
132	2	19.8	19.9667	4.4	3.75	0.8712	0.7425	1.6137	493	-117	2016-03-10
132	2	20.3	19.9667	4.29	3.72	0.87087	0.75516	1.62603	492	-116	2016-03-11
132	2	19.8	20.0333	4.14	3.71	0.81972	0.73458	1.5543	493	-115	2016-03-12
132	2	19.8	19.3667	4.24	3.75	0.83952	0.7425	1.58202	491	-114	2016-03-13
132	2	20.5	19.0333	4.34	3.76	0.8897	0.7708	1.6605	492	-113	2016-03-14
132	2	17.8	18.2667	4.29	3.81	0.76362	0.67818	1.4418	493	-112	2016-03-15
132	2	18.8	18.4	4.21	3.87	0.79148	0.72756	1.51904	496	-111	2016-03-16
132	2	18.2	16.8667	4.28	3.84	0.77896	0.69888	1.47784	489	-110	2016-03-17
132	2	18.2	14.9	4.44	3.8	0.80808	0.6916	1.49968	479	-109	2016-03-18
132	2	14.2	14.4667	4.64	3.74	0.65888	0.53108	1.18996	479	-108	2016-03-19
132	2	12.3	15.7	5.21	3.63	0.64083	0.44649	1.08732	465	-107	2016-03-20
132	2	16.9	17.7	5.16	3.44	0.87204	0.58136	1.4534	477	-106	2016-03-21
132	2	17.9	18.4	4.87	3.36	0.87173	0.60144	1.47317	452	-105	2016-03-22
132	2	18.3	18.3333	4.66	3.43	0.85278	0.62769	1.48047	459	-104	2016-03-23
132	2	19	18.1667	4.28	3.47	0.8132	0.6593	1.4725	482	-103	2016-03-24
132	2	17.7	17.8667	4.18	3.5	0.73986	0.6195	1.35936	470	-102	2016-03-25
132	2	17.8	18.1	4.32	3.58	0.76896	0.63724	1.4062	494	-101	2016-03-26
132	2	18.1	18.3667	4.3	3.59	0.7783	0.64979	1.42809	494	-100	2016-03-27
132	2	18.4	18.4667	4.23	3.62	0.77832	0.66608	1.4444	491	-99	2016-03-28
132	2	18.6	18.6	4.24	3.7	0.78864	0.6882	1.47684	493	-98	2016-03-29
132	2	18.4	18.8333	4.24	3.68	0.78016	0.67712	1.45728	497	-97	2016-03-30
132	2	18.8	18.8333	4.27	3.69	0.80276	0.69372	1.49648	497	-96	2016-03-31
132	2	19.3	18.8667	4.39	3.75	0.84727	0.72375	1.57102	487	-95	2016-04-01
132	2	18.4	17.9333	4.43	3.81	0.81512	0.70104	1.51616	501	-94	2016-04-02
132	2	18.9	17.2667	4.31	3.83	0.81459	0.72387	1.53846	494	-93	2016-04-03
132	2	16.5	16.7333	4.48	3.79	0.7392	0.62535	1.36455	498	-92	2016-04-04
132	2	16.4	17.4333	4.66	3.69	0.76424	0.60516	1.3694	461	-91	2016-04-05
132	2	17.3	17.3667	4.56	3.59	0.78888	0.62107	1.40995	483	-90	2016-04-06
132	2	18.6	17.5333	4.6	3.58	0.8556	0.66588	1.52148	460	-89	2016-04-07
132	2	16.2	17	4.42	3.66	0.71604	0.59292	1.30896	504	-88	2016-04-08
132	2	17.8	17.9	4.12	3.67	0.73336	0.65326	1.38662	503	-87	2016-04-09
132	2	17	18.4667	4.05	3.64	0.6885	0.6188	1.3073	479	-86	2016-04-10
132	2	18.9	19.0667	4.31	3.6	0.81459	0.6804	1.49499	496	-85	2016-04-11
132	2	19.5	19	4.26	3.56	0.8307	0.6942	1.5249	478	-84	2016-04-12
132	2	18.8	17.9	4.22	3.59	0.79336	0.67492	1.46828	490	-83	2016-04-13
132	2	18.7	17.6333	4.06	3.64	0.75922	0.68068	1.4399	498	-82	2016-04-14
132	2	16.2	17.7333	4.16	3.65	0.67392	0.5913	1.26522	497	-81	2016-04-15
132	2	18	18.6	4.28	3.62	0.7704	0.6516	1.422	492	-80	2016-04-16
132	2	19	18.3	4.39	3.59	0.8341	0.6821	1.5162	470	-79	2016-04-17
132	2	18.8	17.5	4.39	3.64	0.82532	0.68432	1.50964	509	-78	2016-04-18
132	2	17.1	16.7	4.05	3.64	0.69255	0.62244	1.31499	488	-77	2016-04-19
132	2	16.6	16.6667	4.17	3.66	0.69222	0.60756	1.29978	500	-76	2016-04-20
132	2	16.4	16.7667	4.28	3.64	0.70192	0.59696	1.29888	507	-75	2016-04-21
132	2	17	16.9667	4.47	3.61	0.7599	0.6137	1.3736	509	-74	2016-04-22
132	2	16.9	16.9333	4.35	3.58	0.73515	0.60502	1.34017	514	-73	2016-04-23
132	2	17	16.7	4.06	3.55	0.6902	0.6035	1.2937	510	-72	2016-04-24
132	2	16.9	17.1333	3.85	3.58	0.65065	0.60502	1.25567	485	-71	2016-04-25
132	2	16.2	17.4	3.96	3.63	0.64152	0.58806	1.22958	497	-70	2016-04-26
132	2	18.3	18.1667	4.12	3.63	0.75396	0.66429	1.41825	494	-69	2016-04-27
132	2	17.7	18.3	3.82	3.63	0.67614	0.64251	1.31865	476	-68	2016-04-28
132	2	18.5	19.0667	3.47	3.62	0.64195	0.6697	1.31165	524	-67	2016-04-29
132	2	18.7	19.1667	3.67	3.64	0.68629	0.68068	1.36697	525	-66	2016-04-30
132	2	20	19.2667	4.13	3.67	0.826	0.734	1.56	521	-65	2016-05-01
132	2	18.8	19.3333	4.31	3.71	0.81028	0.69748	1.50776	518	-64	2016-05-02
132	2	19	19.6667	4.42	3.73	0.8398	0.7087	1.5485	532	-63	2016-05-03
132	2	20.2	19.4333	4.47	3.75	0.90294	0.7575	1.66044	508	-62	2016-05-04
132	2	19.8	19.1	4.54	3.77	0.89892	0.74646	1.64538	518	-61	2016-05-05
132	2	18.3	18.8667	4.46	3.81	0.81618	0.69723	1.51341	506	-60	2016-05-06
132	2	19.2	19.2	4.52	3.79	0.86784	0.72768	1.59552	526	-59	2016-05-07
132	2	19.1	18.7333	4.63	3.78	0.88433	0.72198	1.60631	511	-58	2016-05-08
132	2	19.3	19.1333	4.54	3.76	0.87622	0.72568	1.6019	526	-57	2016-05-09
132	2	17.8	19.0667	4.25	3.74	0.7565	0.66572	1.42222	522	-56	2016-05-10
132	2	20.3	19.6	4.15	3.75	0.84245	0.76125	1.6037	516	-55	2016-05-11
132	2	19.1	19.25	4.29	3.76	0.81939	0.71816	1.53755	517	-54	2016-05-12
132	2	19.4	15.65	4.06	3.75	0.78764	0.7275	1.51514	522	-53	2016-05-13
132	2		13.55							-52	2016-05-14
132	2	11.9	15.2667	3.84	3.82	0.45696	0.45458	0.91154		-51	2016-05-15
132	2	15.2	17.8	4.44	3.69	0.67488	0.56088	1.23576	516	-50	2016-05-16
132	2	18.7	18.8667	4.83	3.56	0.90321	0.66572	1.56893	519	-49	2016-05-17
132	2	19.5	19.0667	4.96	3.61	0.9672	0.70395	1.67115	502	-48	2016-05-18
132	2	18.4	19.2667	4.22	3.64	0.77648	0.66976	1.44624	495	-47	2016-05-19
132	2	19.3	19.9	3.84	3.66	0.74112	0.70638	1.4475	511	-46	2016-05-20
132	2	20.1	20.6	3.73	3.73	0.74973	0.74973	1.49946	511	-45	2016-05-21
132	2	20.3	20.9	3.56	3.71	0.72268	0.75313	1.47581	517	-44	2016-05-22
132	2	21.4	20.8333	3.59	3.72	0.76826	0.79608	1.56434	512	-43	2016-05-23
132	2	21	20.0667	3.63	3.77	0.7623	0.7917	1.554	513	-42	2016-05-24
132	2	20.1	18.2667	3.68	3.77	0.73968	0.75777	1.49745	526	-41	2016-05-25
132	2	19.1	17.3333	3.73	3.85	0.71243	0.73535	1.44778	510	-40	2016-05-26
132	2	15.6	17.1333	3.99	3.83	0.62244	0.59748	1.21992	510	-39	2016-05-27
132	2	17.3	17.7333	4.24	3.69	0.73352	0.63837	1.37189	497	-38	2016-05-28
132	2	18.5	18.4	4.36	3.57	0.8066	0.66045	1.46705	497	-37	2016-05-29
132	2	17.4	18.6333	4.13	3.65	0.71862	0.6351	1.35372	520	-36	2016-05-30
132	2	19.3	19.7333	3.97	3.71	0.76621	0.71603	1.48224	516	-35	2016-05-31
132	2	19.2	19.2667	3.97	3.71	0.76224	0.71232	1.47456	520	-34	2016-06-01
132	2	20.7	18.9	3.79	3.69	0.78453	0.76383	1.54836	510	-33	2016-06-02
132	2	17.9	17.7333	3.6	3.79	0.6444	0.67841	1.32281	527	-32	2016-06-03
132	2	18.1	17.4333	3.62	3.79	0.65522	0.68599	1.34121	518	-31	2016-06-04
132	2	17.2	17.0333	3.59	3.73	0.61748	0.64156	1.25904	527	-30	2016-06-05
132	2	17	17.3667	3.32	3.73	0.5644	0.6341	1.1985	527	-29	2016-06-06
132	2	16.9	16.8667	3.52	3.65	0.59488	0.61685	1.21173	521	-28	2016-06-07
132	2	18.2	17	3.62	3.65	0.65884	0.6643	1.32314	519	-27	2016-06-08
132	2	15.5	17	3.91	3.7	0.60605	0.5735	1.17955	514	-26	2016-06-09
132	2	17.3	17.7333	4.22	3.67	0.73006	0.63491	1.36497	497	-25	2016-06-10
132	2	18.2	17.9667	3.6	3.71	0.6552	0.67522	1.33042	546	-24	2016-06-11
132	2	17.7	18.2333	3.13	3.72	0.55401	0.65844	1.21245	516	-23	2016-06-12
132	2	18	18.3667	3.37	3.72	0.6066	0.6696	1.2762	525	-22	2016-06-13
132	2	19	17.3667	3.58	3.63	0.6802	0.6897	1.3699	533	-21	2016-06-14
132	2	18.1	16.3	3.88	3.73	0.70228	0.67513	1.37741	524	-20	2016-06-15
132	2	15	15.6	3.63	3.75	0.5445	0.5625	1.107	486	-19	2016-06-16
132	2	15.8	16.6	3.51	3.55	0.55458	0.5609	1.11548	489	-18	2016-06-17
132	2	16	17.7333	3.76	3.41	0.6016	0.5456	1.1472	494	-17	2016-06-18
132	2	18	18.6	4.03	3.37	0.7254	0.6066	1.332	527	-16	2016-06-19
132	2	19.2	19.0667	3.76	3.38	0.72192	0.64896	1.37088	529	-15	2016-06-20
132	2	18.6	18.5333	3.29	3.41	0.61194	0.63426	1.2462	533	-14	2016-06-21
132	2	19.4	19.3	2.73	3.36	0.52962	0.65184	1.18146	510	-13	2016-06-22
132	2	17.6	19.6333	2.97	3.34	0.52272	0.58784	1.11056	518	-12	2016-06-23
132	2	20.9	20.4	2.83	3.39	0.59147	0.70851	1.29998	524	-11	2016-06-24
132	2	20.4	20.5667	2.67	3.47	0.54468	0.70788	1.25256	538	-10	2016-06-25
132	2	19.9	20.1667	2.65	3.53	0.52735	0.70247	1.22982	530	-9	2016-06-26
132	2	21.4	20.4333	2.86	3.57	0.61204	0.76398	1.37602	520	-8	2016-06-27
132	2	19.2	20.2667	2.87	3.63	0.55104	0.69696	1.248	499	-7	2016-06-28
132	2	20.7	20.8	3.27	3.68	0.67689	0.76176	1.43865	513	-6	2016-06-29
132	2	20.9	20.3333	3.18	3.63	0.66462	0.75867	1.42329	531	-5	2016-06-30
132	2	20.8	20.5667	3.05	3.67	0.6344	0.76336	1.39776	524	-4	2016-07-01
132	2	19.3	20.7667	2.59	3.65	0.49987	0.70445	1.20432	518	-3	2016-07-02
132	2	21.6	21.7667	3.38	3.54	0.73008	0.76464	1.49472	534	-2	2016-07-03
132	2	21.4	22	3.63	3.5	0.77682	0.749	1.52582	507	-1	2016-07-04
132	2	22.3	22.3	3.42	3.53	0.76266	0.78719	1.54985	535	0	2016-07-05
132	2	22.3	22.0667	3.48	3.53	0.77604	0.78719	1.56323	514	1	2016-07-06
132	2	22.3	21.9667	3.68	3.57	0.82064	0.79611	1.61675	521	2	2016-07-07
132	2	21.6	21.3333	3.35	3.59	0.7236	0.77544	1.49904	529	3	2016-07-08
132	2	22	20.7	3.28	3.57	0.7216	0.7854	1.507	521	4	2016-07-09
132	2	20.4	20.0667	3.43	3.63	0.69972	0.74052	1.44024	514	5	2016-07-10
132	2	19.7	20.3333	3.51	3.55	0.69147	0.69935	1.39082	498	6	2016-07-11
132	2	20.1	20.5	3.75	3.45	0.75375	0.69345	1.4472	526	7	2016-07-12
132	2	21.2	20.5	3.83	3.39	0.81196	0.71868	1.53064	533	8	2016-07-13
132	2	20.2	20.3667	3.91	3.43	0.78982	0.69286	1.48268	536	9	2016-07-14
132	2	20.1	20.4333	3.81	3.49	0.76581	0.70149	1.4673	566	10	2016-07-15
132	2	20.8	20.6333	3.41	3.54	0.70928	0.73632	1.4456	524	11	2016-07-16
132	2	20.4	20.4333	3.24	3.53	0.66096	0.72012	1.38108	522	12	2016-07-17
132	2	20.7	19.5667	3.42	3.53	0.70794	0.73071	1.43865	529	13	2016-07-18
132	2	20.2	19.3	3.22	3.58	0.65044	0.72316	1.3736	497	14	2016-07-19
132	2	17.8	18.8333	3.34	3.64	0.59452	0.64792	1.24244	535	15	2016-07-20
132	2	19.9	19.6667	3.7	3.62	0.7363	0.72038	1.45668	498	16	2016-07-21
132	2	18.8	19.8333	3.89	3.56	0.73132	0.66928	1.4006	517	17	2016-07-22
132	2	20.3	20.5	3.67	3.64	0.74501	0.73892	1.48393	545	18	2016-07-23
132	2	20.4	20.4333	3.62	3.65	0.73848	0.7446	1.48308	510	19	2016-07-24
132	2	20.8	20.4667	3.68	3.61	0.76544	0.75088	1.51632	546	20	2016-07-25
132	2	20.1	20.5	3.43	3.64	0.68943	0.73164	1.42107	521	21	2016-07-26
132	2	20.5	20.8667	3.6	3.66	0.738	0.7503	1.4883	570	22	2016-07-27
132	2	20.9	21.2667	4.09	3.61	0.85481	0.75449	1.6093	543	23	2016-07-28
132	2	21.2	21.1333	3.73	3.66	0.79076	0.77592	1.56668	517	24	2016-07-29
132	2	21.7	20.8	3.66	3.69	0.79422	0.80073	1.59495	556	25	2016-07-30
132	2	20.5	20.1667	3.85	3.74	0.78925	0.7667	1.55595	538	26	2016-07-31
132	2	20.2	19.6667	3.86	3.8	0.77972	0.7676	1.54732	551	27	2016-08-01
132	2	19.8	19.5	4.06	3.79	0.80388	0.75042	1.5543	532	28	2016-08-02
132	2	19	19.1667	4.18	3.76	0.7942	0.7144	1.5086	546	29	2016-08-03
132	2	19.7	18.7667	4.14	3.77	0.81558	0.74269	1.55827	523	30	2016-08-04
132	2	18.8	18.1667	4.33	3.79	0.81404	0.71252	1.52656	539	31	2016-08-05
132	2	17.8	17.9333	4.42	3.77	0.78676	0.67106	1.45782	537	32	2016-08-06
132	2	17.9	17.9333	4.42	3.67	0.79118	0.65693	1.44811	541	33	2016-08-07
132	2	18.1	17.8333	4.5	3.64	0.8145	0.65884	1.47334	541	34	2016-08-08
132	2	17.8	17.7667	4.27	3.69	0.76006	0.65682	1.41688	553	35	2016-08-09
132	2	17.6	17.9667	4.2	3.74	0.7392	0.65824	1.39744	552	36	2016-08-10
132	2	17.9	17.9667	4.08	3.72	0.73032	0.66588	1.3962	543	37	2016-08-11
132	2	18.4	17.4333	4.06	3.68	0.74704	0.67712	1.42416	552	38	2016-08-12
132	2	17.6	17.1667	4.02	3.7	0.70752	0.6512	1.35872	540	39	2016-08-13
132	2	16.3	17.2667	3.81	3.71	0.62103	0.60473	1.22576	543	40	2016-08-14
132	2	17.6	17.7667	3.78	3.64	0.66528	0.64064	1.30592	554	41	2016-08-15
132	2	17.9	17.4	3.64	3.62	0.65156	0.64798	1.29954	556	42	2016-08-16
132	2	17.8	17.5	3.19	3.64	0.56782	0.64792	1.21574	567	43	2016-08-17
132	2	16.5	17.5667	3.11	3.67	0.51315	0.60555	1.1187	534	44	2016-08-18
132	2	18.2	17.8667	3.49	3.6	0.63518	0.6552	1.29038	547	45	2016-08-19
132	2	18	18	3.98	3.55	0.7164	0.639	1.3554	539	46	2016-08-20
132	2	17.4	18	3.63	3.6	0.63162	0.6264	1.25802	534	47	2016-08-21
132	2	18.6	18.2333	3.52	3.58	0.65472	0.66588	1.3206	556	48	2016-08-22
132	2	18	18.2	3.56	3.6	0.6408	0.648	1.2888	550	49	2016-08-23
132	2	18.1	18.4	3.3	3.61	0.5973	0.65341	1.25071	545	50	2016-08-24
132	2	18.5	18.6	3.17	3.48	0.58645	0.6438	1.23025	534	51	2016-08-25
132	2	18.6	18.6	3.27	3.27	0.60822	0.60822	1.21644	544	52	2016-08-26
132	2	18.7	18.6667	3.39	3.27	0.63393	0.61149	1.24542	573	53	2016-08-27
132	2	18.5	18.9667	3.27	3.28	0.60495	0.6068	1.21175	528	54	2016-08-28
132	2	18.8	19.2667	3.47	3.24	0.65236	0.60912	1.26148	547	55	2016-08-29
132	2	19.6	19.2333	3.59	3.21	0.70364	0.62916	1.3328	538	56	2016-08-30
132	2	19.4	19	3.3	3.22	0.6402	0.62468	1.26488	539	57	2016-08-31
132	2	18.7	18.9333	3.26	3.25	0.60962	0.60775	1.21737	540	58	2016-09-01
132	2	18.9	18.9333	3.47	3.25	0.65583	0.61425	1.27008	548	59	2016-09-02
132	2	19.2	19.1333	3.48	3.23	0.66816	0.62016	1.28832	543	60	2016-09-03
132	2	18.7	19	3.47	3.22	0.64889	0.60214	1.25103	515	61	2016-09-04
132	2	19.5	19.3	3.75	3.21	0.73125	0.62595	1.3572	542	62	2016-09-05
132	2	18.8	19.0333	3.77	3.2	0.70876	0.6016	1.31036	547	63	2016-09-06
132	2	19.6	18.8	3.61	3.22	0.70756	0.63112	1.33868	500	64	2016-09-07
132	2	18.7	18.8333	3.38	3.19	0.63206	0.59653	1.22859	516	65	2016-09-08
132	2	18.1	18.9667	3.42	3.1	0.61902	0.5611	1.18012	542	66	2016-09-09
132	2	19.7	19.0667	3.56	3.1	0.70132	0.6107	1.31202	508	67	2016-09-10
132	2	19.1	19	3.65	3.14	0.69715	0.59974	1.29689	542	68	2016-09-11
132	2	18.4	19.3333	3.59	3.19	0.66056	0.58696	1.24752	536	69	2016-09-12
132	2	19.5	19.6667	3.53	3.17	0.68835	0.61815	1.3065	558	70	2016-09-13
132	2	20.1	19.6333	3.5	3.18	0.7035	0.63918	1.34268	544	71	2016-09-14
132	2	19.4	19.3	3.48	3.19	0.67512	0.61886	1.29398	557	72	2016-09-15
132	2	19.4	19.3333	3.61	3.18	0.70034	0.61692	1.31726	529	73	2016-09-16
132	2	19.1	19.1	3.62	3.19	0.69142	0.60929	1.30071	482	74	2016-09-17
132	2	19.5	19.3333	3.48	3.23	0.6786	0.62985	1.30845	526	75	2016-09-18
132	2	18.7	18.9333	3.55	3.19	0.66385	0.59653	1.26038	527	76	2016-09-19
132	2	19.8	18.7	3.53	3.11	0.69894	0.61578	1.31472	499	77	2016-09-20
132	2	18.3	18.5333	3.58	3.08	0.65514	0.56364	1.21878	554	78	2016-09-21
132	2	18	19	3.58	3.09	0.6444	0.5562	1.2006	548	79	2016-09-22
132	2	19.3	19.2	3.5	3.09	0.6755	0.59637	1.27187	538	80	2016-09-23
132	2	19.7	19.4333	3.31	3.08	0.65207	0.60676	1.25883	514	81	2016-09-24
132	2	18.6	19.1667	3.43	3.07	0.63798	0.57102	1.209	525	82	2016-09-25
132	2	20	19.3333	3.41	3.06	0.682	0.612	1.294	542	83	2016-09-26
132	2	18.9	19.3	3.48	3.08	0.65772	0.58212	1.23984	549	84	2016-09-27
132	2	19.1	19.8	3.62	3.05	0.69142	0.58255	1.27397	539	85	2016-09-28
132	2	19.9	19.8	3.6	3.05	0.7164	0.60695	1.32335	558	86	2016-09-29
132	2	20.4	18.3333	3.47	3.06	0.70788	0.62424	1.33212	547	87	2016-09-30
132	2	19.1	17.2333	3.27	3.09	0.62457	0.59019	1.21476	505	88	2016-10-01
132	2	15.5	17.2	3.4	3.16	0.527	0.4898	1.0168	520	89	2016-10-02
132	2	17.1	18.2333	3.58	3.09	0.61218	0.52839	1.14057	508	90	2016-10-03
132	2	19	18.8667	3.92	2.97	0.7448	0.5643	1.3091	537	91	2016-10-04
132	2	18.6	18.8	3.76	3.09	0.69936	0.57474	1.2741	528	92	2016-10-05
132	2	19	19.1667	3.49	3.08	0.6631	0.5852	1.2483	518	93	2016-10-06
132	2	18.8	18.8333	3.5	3.09	0.658	0.58092	1.23892	550	94	2016-10-07
132	2	19.7	18.3	3.62	3.11	0.71314	0.61267	1.32581	555	95	2016-10-08
132	2	18	17.4667	3.44	3.1	0.6192	0.558	1.1772	498	96	2016-10-09
132	2	17.2	16.9333	3.73	3.11	0.64156	0.53492	1.17648	547	97	2016-10-10
132	2	17.2	16.8667	3.76	3.09	0.64672	0.53148	1.1782	536	98	2016-10-11
132	2	16.4	17.2	3.51	3.09	0.57564	0.50676	1.0824	511	99	2016-10-12
132	2	17	17.5333	3.73	3.07	0.6341	0.5219	1.156	559	100	2016-10-13
132	2	18.2	17.7	3.76	3.07	0.68432	0.55874	1.24306	552	101	2016-10-14
132	2	17.4	17.3333	3.72	3.14	0.64728	0.54636	1.19364	527	102	2016-10-15
132	2	17.5	17.2	3.82	3.22	0.6685	0.5635	1.232	555	103	2016-10-16
132	2	17.1	17.1333	3.88	3.23	0.66348	0.55233	1.21581	547	104	2016-10-17
132	2	17	16.8	4.01	3.18	0.6817	0.5406	1.2223	547	105	2016-10-18
132	2	17.3	17	3.53	3.04	0.61069	0.52592	1.13661	534	106	2016-10-19
132	2	16.1	16.7333	3.42	3.04	0.55062	0.48944	1.04006	535	107	2016-10-20
132	2	17.6	16.4333	3.46	3.06	0.60896	0.53856	1.14752	552	108	2016-10-21
132	2	16.5	16.0667	3.53	3	0.58245	0.495	1.07745	556	109	2016-10-22
132	2	15.2	15.8667	3.61	2.99	0.54872	0.45448	1.0032	523	110	2016-10-23
132	2	16.5	16	3.69	3.01	0.60885	0.49665	1.1055	537	111	2016-10-24
132	2	15.9	16.2333	3.6	3.03	0.5724	0.48177	1.05417	529	112	2016-10-25
132	2	15.6	16.6667	3.62	3.05	0.56472	0.4758	1.04052	504	113	2016-10-26
132	2	17.2	17.2333	3.79	3.07	0.65188	0.52804	1.17992	545	114	2016-10-27
132	2	17.2	17.5	3.85	3.12	0.6622	0.53664	1.19884	555	115	2016-10-28
132	2	17.3	17.5667	3.81	3.11	0.65913	0.53803	1.19716	545	116	2016-10-29
132	2	18	17.7333	3.79	3.12	0.6822	0.5616	1.2438	510	117	2016-10-30
132	2	17.4	17.4333	3.78	3.13	0.65772	0.54462	1.20234	540	118	2016-10-31
132	2	17.8	16.9333	3.93	3.1	0.69954	0.5518	1.25134	548	119	2016-11-01
132	2	17.1	16.7667	4.04	3.08	0.69084	0.52668	1.21752	540	120	2016-11-02
132	2	15.9	17.0667	3.78	3.06	0.60102	0.48654	1.08756	532	121	2016-11-03
132	2	17.3	17.6333	3.48	3.02	0.60204	0.52246	1.1245	578	122	2016-11-04
132	2	18	17.8333	3.63	3.08	0.6534	0.5544	1.2078	534	123	2016-11-05
132	2	17.6	17.7333	4.19	3.17	0.73744	0.55792	1.29536	556	124	2016-11-06
132	2	17.9	17.9333	4.11	3.23	0.73569	0.57817	1.31386	540	125	2016-11-07
132	2	17.7	17.6	4.07	3.24	0.72039	0.57348	1.29387	553	126	2016-11-08
132	2	18.2	17.8667	4.18	3.28	0.76076	0.59696	1.35772	551	127	2016-11-09
132	2	16.9	17.7333	4.1	3.29	0.6929	0.55601	1.24891	547	128	2016-11-10
132	2	18.5	18.2	3.73	3.31	0.69005	0.61235	1.3024	555	129	2016-11-11
132	2	17.8	17.8333	3.83	3.31	0.68174	0.58918	1.27092	542	130	2016-11-12
132	2	18.3	17.2333	4.03	3.33	0.73749	0.60939	1.34688	557	131	2016-11-13
132	2	17.4	16.7333	3.87	3.38	0.67338	0.58812	1.2615	561	132	2016-11-14
132	2	16	16.9667	4.15	3.44	0.664	0.5504	1.2144	553	133	2016-11-15
132	2	16.8	17.6333	4.34	3.53	0.72912	0.59304	1.32216	560	134	2016-11-16
132	2	18.1	18.2333	4.46	3.42	0.80726	0.61902	1.42628	560	135	2016-11-17
132	2	18	18.1	4.25	3.38	0.765	0.6084	1.3734	556	136	2016-11-18
132	2	18.6	17.4667	4.33	3.52	0.80538	0.65472	1.4601	558	137	2016-11-19
132	2	17.7	16.4667	4.4	3.55	0.7788	0.62835	1.40715	536	138	2016-11-20
132	2	16.1	15.9667	4.25	3.58	0.68425	0.57638	1.26063	553	139	2016-11-21
132	2	15.6	15.9667	4.12	3.58	0.64272	0.55848	1.2012	551	140	2016-11-22
132	2	16.2	16.3333	4.18	3.54	0.67716	0.57348	1.25064	517	141	2016-11-23
132	2	16.1	16.5667	4.52	3.45	0.72772	0.55545	1.28317	564	142	2016-11-24
132	2	16.7	16.4	4.45	3.44	0.74315	0.57448	1.31763	554	143	2016-11-25
132	2	16.9	16.3333	4.21	3.55	0.71149	0.59995	1.31144	562	144	2016-11-26
132	2	15.6	16.1	4.18	3.56	0.65208	0.55536	1.20744	557	145	2016-11-27
132	2	16.5	16.2	4.2	3.54	0.693	0.5841	1.2771	566	146	2016-11-28
132	2	16.2	15.6	4.3	3.56	0.6966	0.57672	1.27332	559	147	2016-11-29
132	2	15.9	15.9	4.19	3.55	0.66621	0.56445	1.23066	564	148	2016-11-30
132	2	14.7	16.1333			0	0	0	551	149	2016-12-01
132	2	17.1	16.0333	4.73	3.74	0.80883	0.63954	1.44837	549	150	2016-12-02
132	2	16.6	15.3667	4.58	3.71	0.76028	0.61586	1.37614	558	151	2016-12-03
132	2	14.4	14.1333	4.34	3.71	0.62496	0.53424	1.1592	565	152	2016-12-04
132	2	15.1	14.4333	4.42	3.75	0.66742	0.56625	1.23367	561	153	2016-12-05
132	2	12.9	14.1	4.68	3.84	0.60372	0.49536	1.09908	558	154	2016-12-06
132	2	15.3	14.6333	4.73	3.81	0.72369	0.58293	1.30662	566	155	2016-12-07
132	2	14.1	14.8	4.57	3.67	0.64437	0.51747	1.16184	570	156	2016-12-08
132	2	14.5	14.6333	4.51	3.59	0.65395	0.52055	1.1745	553	157	2016-12-09
132	2	15.8	14.6	4.52	3.62	0.71416	0.57196	1.28612	561	158	2016-12-10
132	2	13.6	14.3	4.46	3.69	0.60656	0.50184	1.1084	550	159	2016-12-11
132	2	14.4	14.3333	4.48	3.72	0.64512	0.53568	1.1808	559	160	2016-12-12
132	2	14.9	13.3	4.47	3.68	0.66603	0.54832	1.21435	577	161	2016-12-13
132	2	13.7	12.2333	4.52	3.7	0.61924	0.5069	1.12614	567	162	2016-12-14
132	2	11.3	12	4.47	3.73	0.50511	0.42149	0.9266	563	163	2016-12-15
132	2	11.7	12.7333	4.45	3.67	0.52065	0.42939	0.95004	562	164	2016-12-16
132	2	13	13.4	4.41	3.57	0.5733	0.4641	1.0374	548	165	2016-12-17
132	2	13.5	13.4667	4.59	3.53	0.61965	0.47655	1.0962	575	166	2016-12-18
132	2	13.7	13.2667	4.69	3.58	0.64253	0.49046	1.13299	569	167	2016-12-19
132	2	13.2	12.7667	4.64	3.65	0.61248	0.4818	1.09428	561	168	2016-12-20
132	2	12.9	12.6	4.84	3.68	0.62436	0.47472	1.09908	567	169	2016-12-21
132	2	12.2	12.2667	4.72	3.67	0.57584	0.44774	1.02358	577	170	2016-12-22
132	2	12.7	11.9667	4.67	3.65	0.59309	0.46355	1.05664	565	171	2016-12-23
132	2	11.9	11.9	4.49	3.66	0.53431	0.43554	0.96985	563	172	2016-12-24
132	2	11.3	12.1	4.54	3.61	0.51302	0.40793	0.92095	572	173	2016-12-25
132	2	12.5	12.6333	4.59	3.53	0.57375	0.44125	1.015	569	174	2016-12-26
132	2	12.5	12.6333	4.64	3.54	0.58	0.4425	1.0225	577	175	2016-12-27
132	2	12.9	13.0667	4.66	3.61	0.60114	0.46569	1.06683	575	176	2016-12-28
132	2	12.5	13.5	4.78	3.63	0.5975	0.45375	1.05125	566	177	2016-12-29
132	2	13.8	13.9	4.67	3.6	0.64446	0.4968	1.14126	574	178	2016-12-30
132	2	14.2	14	4.44	3.62	0.63048	0.51404	1.14452	575	179	2016-12-31
132	2	13.7	13.9333	4.51	3.61	0.61787	0.49457	1.11244	581	180	2017-01-01
132	2	14.1	14.2	4.49	3.63	0.63309	0.51183	1.14492	578	181	2017-01-02
132	2	14	14.1333	4.32	3.62	0.6048	0.5068	1.1116	586	182	2017-01-03
132	2	14.5	13.4	4.3	3.65	0.6235	0.52925	1.15275	586	183	2017-01-04
132	2	13.9	13	4.36	3.7	0.60604	0.5143	1.12034	592	184	2017-01-05
132	2	11.8	12.9667	4.4	3.7	0.5192	0.4366	0.9558	569	185	2017-01-06
132	2	13.3	13.4667	4.44	3.67	0.59052	0.48811	1.07863	624	186	2017-01-07
132	2	13.8	13.1333	4.51	3.69	0.62238	0.50922	1.1316	587	187	2017-01-08
132	2	13.3	11.9	4.53	3.72	0.60249	0.49476	1.09725	569	188	2017-01-09
132	2	12.3	10.9333	4.67	3.72	0.57441	0.45756	1.03197	551	189	2017-01-10
132	2	10.1	11.1667	4.56	3.68	0.46056	0.37168	0.83224	566	190	2017-01-11
132	2	10.4	12.1667	4.92	3.53	0.51168	0.36712	0.8788	571	191	2017-01-12
132	2	13	12.9333	4.88	3.42	0.6344	0.4446	1.079	576	192	2017-01-13
132	2	13.1	12.9	4.52	3.48	0.59212	0.45588	1.048	571	193	2017-01-14
132	2	12.7	12.7	4.36	3.52	0.55372	0.44704	1.00076	575	194	2017-01-15
144	6	13.7	14.35							-164	2016-01-13
144	6	15	15.5						515	-163	2016-01-14
144	6	17.8	19	5.59	4.53	0.99502	0.80634	1.80136	496	-162	2016-01-15
144	6	24.2	22.8	5.37	4.34	1.29954	1.05028	2.34982	512	-161	2016-01-16
144	6	26.4	26.0333	5.3	4.13	1.3992	1.09032	2.48952	500	-160	2016-01-17
144	6	27.5	27.5	4.89	3.97	1.34475	1.09175	2.4365	513	-159	2016-01-18
144	6	28.6	28.2333	4.66	3.9	1.33276	1.1154	2.44816	516	-158	2016-01-19
144	6	28.6	28	4.48	3.83	1.28128	1.09538	2.37666	513	-157	2016-01-20
144	6	26.8	28.7	4.52	3.73	1.21136	0.99964	2.211	506	-156	2016-01-21
144	6	30.7	28.9667	4.66	3.64	1.43062	1.11748	2.5481	507	-155	2016-01-22
144	6	29.4	29.8	4.45	3.84	1.3083	1.12896	2.43726	505	-154	2016-01-23
144	6	29.3	29.3333	4.4	3.77	1.2892	1.10461	2.39381	505	-153	2016-01-24
144	6	29.3	29.5667	4.57	3.71	1.33901	1.08703	2.42604	508	-152	2016-01-25
144	6	30.1	29.2	4.41	3.7	1.32741	1.1137	2.44111	495	-151	2016-01-26
144	6	28.2	28.9333	4.46	3.72	1.25772	1.04904	2.30676	516	-150	2016-01-27
144	6	28.5	28.1333	4.66	3.65	1.3281	1.04025	2.36835	496	-149	2016-01-28
144	6	27.7	28.7333	4.85	3.6	1.34345	0.9972	2.34065	496	-148	2016-01-29
144	6	30	28.9667	4.61	3.55	1.383	1.065	2.448	472	-147	2016-01-30
144	6	29.2	28.9	4.65	3.52	1.3578	1.02784	2.38564	495	-146	2016-01-31
144	6	27.5	28.1333	4.62	3.56	1.2705	0.979	2.2495	495	-145	2016-02-01
144	6	27.7	28.2333	4.55	3.53	1.26035	0.97781	2.23816	489	-144	2016-02-02
144	6	29.5	29.1667	4.19	3.49	1.23605	1.02955	2.2656	489	-143	2016-02-03
144	6	30.3	29.9	4.43	3.45	1.34229	1.04535	2.38764	497	-142	2016-02-04
144	6	29.9	30.3	4.56	3.44	1.36344	1.02856	2.392	503	-141	2016-02-05
144	6	30.7	30.2333	4.11	3.54	1.26177	1.08678	2.34855	501	-140	2016-02-06
144	6	30.1	30.3333	4.37	3.52	1.31537	1.05952	2.37489	503	-139	2016-02-07
144	6	30.2	30.3667	4.43	3.52	1.33786	1.06304	2.4009	505	-138	2016-02-08
144	6	30.8	29.8667	4.73	3.48	1.45684	1.07184	2.52868	506	-137	2016-02-09
144	6	28.6	29.5	4.45	3.48	1.2727	0.99528	2.26798	501	-136	2016-02-10
144	6	29.1	29.2333	4.36	3.49	1.26876	1.01559	2.28435	502	-135	2016-02-11
144	6	30	29.4333	4.63	3.49	1.389	1.047	2.436	492	-134	2016-02-12
144	6	29.2	29.8	4.84	3.53	1.41328	1.03076	2.44404	490	-133	2016-02-13
144	6	30.2	30.2	4.95	3.44	1.4949	1.03888	2.53378	489	-132	2016-02-14
144	6	31.2	31.0667	4.17	3.57	1.30104	1.11384	2.41488	511	-131	2016-02-15
144	6	31.8	31.5	4.52	3.54	1.43736	1.12572	2.56308	532	-130	2016-02-16
144	6	31.5	31.4333	4.64	3.5	1.4616	1.1025	2.5641	498	-129	2016-02-17
144	6	31	30.6667	4.63	3.48	1.4353	1.0788	2.5141	524	-128	2016-02-18
144	6	29.5	30.0667	4.46	3.56	1.3157	1.0502	2.3659	484	-127	2016-02-19
144	6	29.7	29.9333	4.88	3.4	1.44936	1.0098	2.45916	496	-126	2016-02-20
144	6	30.6	30.0333	4.6	3.46	1.4076	1.05876	2.46636	551	-125	2016-02-21
144	6	29.8	30.0667	5.03	3.42	1.49894	1.01916	2.5181	499	-124	2016-02-22
144	6	29.8	29.7	4.65	3.45	1.3857	1.0281	2.4138	526	-123	2016-02-23
144	6	29.5	29.8	4.69	3.44	1.38355	1.0148	2.39835	505	-122	2016-02-24
144	6	30.1	29.5	4.37	3.56	1.31537	1.07156	2.38693	498	-121	2016-02-25
144	6	28.9	28.5333	4.29	3.63	1.23981	1.04907	2.28888	490	-120	2016-02-26
144	6	26.6	27.6	4.15	3.53	1.1039	0.93898	2.04288	503	-119	2016-02-27
144	6	27.3	27.4333	3.81	3.42	1.04013	0.93366	1.97379	505	-118	2016-02-28
144	6	28.4	28.3	3.91	3.49	1.11044	0.99116	2.1016	534	-117	2016-02-29
144	6	29.2	29.6667	3.43	3.56	1.00156	1.03952	2.04108	499	-116	2016-03-01
144	6	31.4	29.7667	3.99	3.61	1.25286	1.13354	2.3864	500	-115	2016-03-02
144	6	28.7	29.8	4.48	3.67	1.28576	1.05329	2.33905	520	-114	2016-03-03
144	6	29.3	29.2	4.4	3.75	1.2892	1.09875	2.38795	506	-113	2016-03-04
144	6	29.6	29.0333	4.44	3.87	1.31424	1.14552	2.45976	510	-112	2016-03-05
144	6	28.2	28.5667	4.95	3.9	1.3959	1.0998	2.4957	512	-111	2016-03-06
144	6	27.9	28.3	4.73	3.89	1.31967	1.08531	2.40498	502	-110	2016-03-07
144	6	28.8	28.2333	4.75	3.87	1.368	1.11456	2.48256	513	-109	2016-03-08
144	6	28	28.6667	4.6	3.87	1.288	1.0836	2.3716	517	-108	2016-03-09
144	6	29.2	28.8333	4.63	3.9	1.35196	1.1388	2.49076	504	-107	2016-03-10
144	6	29.3	29.0333	4.67	3.84	1.36831	1.12512	2.49343	513	-106	2016-03-11
144	6	28.6	29.1667	4.6	3.86	1.3156	1.10396	2.41956	495	-105	2016-03-12
144	6	29.6	29.2	4.8	3.84	1.4208	1.13664	2.55744	504	-104	2016-03-13
144	6	29.4	29.1	4.85	3.83	1.4259	1.12602	2.55192	507	-103	2016-03-14
144	6	28.3	28.6333	4.93	3.86	1.39519	1.09238	2.48757	517	-102	2016-03-15
144	6	28.2	28.2333	4.71	3.82	1.32822	1.07724	2.40546	524	-101	2016-03-16
144	6	28.2	27.8	4.63	3.79	1.30566	1.06878	2.37444	519	-100	2016-03-17
144	6	27	27.6667	4.8	3.82	1.296	1.0314	2.3274	510	-99	2016-03-18
144	6	27.8	27.8333	4.78	3.83	1.32884	1.06474	2.39358	515	-98	2016-03-19
144	6	28.7	28.4667	4.68	3.88	1.34316	1.11356	2.45672	509	-97	2016-03-20
144	6	28.9	28.4667	4.61	3.9	1.33229	1.1271	2.45939	507	-96	2016-03-21
144	6	27.8	27.9333	4.59	3.87	1.27602	1.07586	2.35188	511	-95	2016-03-22
144	6	27.1	27.5333	4.76	3.83	1.28996	1.03793	2.32789	501	-94	2016-03-23
144	6	27.7	27.5333	4.64	3.81	1.28528	1.05537	2.34065	501	-93	2016-03-24
144	6	27.8	27.9	4.56	3.78	1.26768	1.05084	2.31852	497	-92	2016-03-25
144	6	28.2	28.0667	4.93	3.8	1.39026	1.0716	2.46186	526	-91	2016-03-26
144	6	28.2	26.1667	4.77	3.84	1.34514	1.08288	2.42802	504	-90	2016-03-27
144	6	22.1	27.8667	4.39	3.85	0.97019	0.85085	1.82104	500	-89	2016-03-28
144	6	33.3	27.6667	4.64	3.86	1.54512	1.28538	2.8305	511	-88	2016-03-29
144	6	27.6	29.7	4.94	3.86	1.36344	1.06536	2.4288	500	-87	2016-03-30
144	6	28.2	28.2333	4.98	3.87	1.40436	1.09134	2.4957	505	-86	2016-03-31
144	6	28.9	28.7333	4.99	3.9	1.44211	1.1271	2.56921	506	-85	2016-04-01
144	6	29.1	28.1	4.83	3.94	1.40553	1.14654	2.55207	504	-84	2016-04-02
144	6	26.3	28.2	4.94	3.92	1.29922	1.03096	2.33018	498	-83	2016-04-03
144	6	29.2	27.1333	4.94	3.75	1.44248	1.095	2.53748	509	-82	2016-04-04
144	6	25.9	27.3	4.66	3.8	1.20694	0.9842	2.19114	511	-81	2016-04-05
144	6	26.8	26.9	4.9	3.84	1.3132	1.02912	2.34232	512	-80	2016-04-06
144	6	28	25.8	4.64	3.82	1.2992	1.0696	2.3688	516	-79	2016-04-07
144	6	22.6	25.8333	4.41	3.9	0.99666	0.8814	1.87806	519	-78	2016-04-08
144	6	26.9	26.2	4.2	3.95	1.1298	1.06255	2.19235	513	-77	2016-04-09
144	6	29.1	28.0667	3.65	3.92	1.06215	1.14072	2.20287	515	-76	2016-04-10
144	6	28.2	27.1333	3.91	3.91	1.10262	1.10262	2.20524	521	-75	2016-04-11
144	6	24.1	25.5333	4.08	3.9	0.98328	0.9399	1.92318	535	-74	2016-04-12
144	6	24.3	24.3333	4.59	3.84	1.11537	0.93312	2.04849	581	-73	2016-04-13
144	6	24.6	24.1333	4.43	3.87	1.08978	0.95202	2.0418	516	-72	2016-04-14
144	6	23.5	24.2667	4.36	3.94	1.0246	0.9259	1.9505	541	-71	2016-04-15
144	6	24.7	25.3667	4.58	3.92	1.13126	0.96824	2.0995	517	-70	2016-04-16
144	6	27.9	25.9	4.5	3.89	1.2555	1.08531	2.34081	522	-69	2016-04-17
144	6	25.1	26.4667	4.41	3.99	1.10691	1.00149	2.1084	535	-68	2016-04-18
144	6	26.4	25.9	4.74	4.09	1.25136	1.07976	2.33112	531	-67	2016-04-19
144	6	26.2	24.6667	4.65	4.09	1.2183	1.07158	2.28988	522	-66	2016-04-20
144	6	21.4	25.8	4.13	4.08	0.88382	0.87312	1.75694	519	-65	2016-04-21
144	6	29.8	25.6	4.54	4.12	1.35292	1.22776	2.58068	521	-64	2016-04-22
144	6	25.6	27.1667	4.96	4.07	1.26976	1.04192	2.31168	526	-63	2016-04-23
144	6	26.1	25.3333	4.97	4.07	1.29717	1.06227	2.35944	531	-62	2016-04-24
144	6	24.3	22.8	4.66	4.06	1.13238	0.98658	2.11896	532	-61	2016-04-25
144	6	18	20.5333	4.5	4.13	0.81	0.7434	1.5534	523	-60	2016-04-26
144	6	19.3	20.5333	4.46	4.08	0.86078	0.78744	1.64822	531	-59	2016-04-27
144	6	24.3	22.1667	5.14	4	1.24902	0.972	2.22102	529	-58	2016-04-28
144	6	22.9	23.8333	4.97	3.94	1.13813	0.90226	2.04039	529	-57	2016-04-29
144	6	24.3	24.6	4.94	3.98	1.20042	0.96714	2.16756	575	-56	2016-04-30
144	6	26.6	25.9	5.18	4.08	1.37788	1.08528	2.46316	549	-55	2016-05-01
144	6	26.8	26.8667	4.87	4.06	1.30516	1.08808	2.39324	540	-54	2016-05-02
144	6	27.2	27.0333	4.7	4.15	1.2784	1.1288	2.4072	530	-53	2016-05-03
144	6	27.1	26.9667	4.67	4.19	1.26557	1.13549	2.40106	529	-52	2016-05-04
144	6	26.6	26.7333	4.56	4.16	1.21296	1.10656	2.31952	540	-51	2016-05-05
144	6	26.5	25.2	4.71	4.12	1.24815	1.0918	2.33995	533	-50	2016-05-06
144	6	22.5	25.5667	4.61	4.13	1.03725	0.92925	1.9665	528	-49	2016-05-07
144	6	27.7	25.7667	4.61	4.17	1.27697	1.15509	2.43206	546	-48	2016-05-08
144	6	27.1	27.3	5.14	4.05	1.39294	1.09755	2.49049	541	-47	2016-05-09
144	6	27.1	25.5667	4.97	4.05	1.34687	1.09755	2.44442	531	-46	2016-05-10
144	6	22.5	25.3333	5.43	4.09	1.22175	0.92025	2.142	541	-45	2016-05-11
144	6	26.4	25.9333	5.75	4.08	1.518	1.07712	2.59512	535	-44	2016-05-12
144	6	28.9	27.6667	5.21	4.01	1.50569	1.15889	2.66458	533	-43	2016-05-13
144	6	27.7	28.0333	4.96	4.11	1.37392	1.13847	2.51239	543	-42	2016-05-14
144	6	27.5	27.4667	5.12	4.11	1.408	1.13025	2.53825	533	-41	2016-05-15
144	6	27.2	26.8667	4.85	4.02	1.3192	1.09344	2.41264	531	-40	2016-05-16
144	6	25.9	26.2	4.99	4.01	1.29241	1.03859	2.331	537	-39	2016-05-17
144	6	25.5	26.1667	4.54	3.97	1.1577	1.01235	2.17005	531	-38	2016-05-18
144	6	27.1	26.4333	4.81	3.97	1.30351	1.07587	2.37938	531	-37	2016-05-19
144	6	26.7	26.7667	4.81	4.02	1.28427	1.07334	2.35761	530	-36	2016-05-20
144	6	26.5	26.3333	4.82	4.02	1.2773	1.0653	2.3426	554	-35	2016-05-21
144	6	25.8	26	4.7	3.99	1.2126	1.02942	2.24202	539	-34	2016-05-22
144	6	25.7	25.8667	4.87	4.01	1.25159	1.03057	2.28216	537	-33	2016-05-23
144	6	26.1	25.4667	4.5	4.01	1.1745	1.04661	2.22111	539	-32	2016-05-24
144	6	24.6	25.1667	4.17	4.04	1.02582	0.99384	2.01966	538	-31	2016-05-25
144	6	24.8	25.2667	4.44	3.99	1.10112	0.98952	2.09064	543	-30	2016-05-26
144	6	26.4	25.9667	4.67	3.94	1.23288	1.04016	2.27304	543	-29	2016-05-27
144	6	26.7	26.8	4.74	3.99	1.26558	1.06533	2.33091	542	-28	2016-05-28
144	6	27.3	25.1	4.47	3.98	1.22031	1.08654	2.30685	537	-27	2016-05-29
144	6	21.3	26.2333	4.32	4	0.92016	0.852	1.77216	540	-26	2016-05-30
144	6	30.1	26.2	4.55	4.08	1.36955	1.22808	2.59763	541	-25	2016-05-31
144	6	27.2	28.2333	4.83	3.93	1.31376	1.06896	2.38272	539	-24	2016-06-01
144	6	27.4	26.7667	4.86	3.88	1.33164	1.06312	2.39476	544	-23	2016-06-02
144	6	25.7	26.2667	4.64	3.94	1.19248	1.01258	2.20506	539	-22	2016-06-03
144	6	25.7	25.5	4.42	3.92	1.13594	1.00744	2.14338	548	-21	2016-06-04
144	6	25.1	26	4.41	3.95	1.10691	0.99145	2.09836	540	-20	2016-06-05
144	6	27.2	26.1333	4.33	3.94	1.17776	1.07168	2.24944	541	-19	2016-06-06
144	6	26.1	26.6667	4.21	3.95	1.09881	1.03095	2.12976	533	-18	2016-06-07
144	6	26.7	26.3667	4.33	3.96	1.15611	1.05732	2.21343	545	-17	2016-06-08
144	6	26.3	26.9	4.31	3.96	1.13353	1.04148	2.17501	542	-16	2016-06-09
144	6	27.7	26.6667	4.47	3.95	1.23819	1.09415	2.33234	550	-15	2016-06-10
144	6	26	26.6333	4.43	3.96	1.1518	1.0296	2.1814	534	-14	2016-06-11
144	6	26.2	25.8	4.36	3.97	1.14232	1.04014	2.18246	537	-13	2016-06-12
144	6	25.2	26.0333	4.62	4.02	1.16424	1.01304	2.17728	532	-12	2016-06-13
144	6	26.7	25.7333	4.77	3.94	1.27359	1.05198	2.32557	549	-11	2016-06-14
144	6	25.3	26.0333	4.81	3.96	1.21693	1.00188	2.21881	541	-10	2016-06-15
144	6	26.1	25.1	4.46	3.95	1.16406	1.03095	2.19501	534	-9	2016-06-16
144	6	23.9	25.3667	4.73	3.87	1.13047	0.92493	2.0554	536	-8	2016-06-17
144	6	26.1	25.4667	4.82	3.8	1.25802	0.9918	2.24982	535	-7	2016-06-18
144	6	26.4	26.1667	4.51	3.73	1.19064	0.98472	2.17536	539	-6	2016-06-19
144	6	26	26.4333	4.28	3.76	1.1128	0.9776	2.0904	536	-5	2016-06-20
144	6	26.9	26.9333	4.38	3.82	1.17822	1.02758	2.2058	541	-4	2016-06-21
144	6	27.9	27.1	4.25	3.79	1.18575	1.05741	2.24316	538	-3	2016-06-22
144	6	26.5	27.4	3.72	3.81	0.9858	1.00965	1.99545	528	-2	2016-06-23
144	6	27.8	31.9	4.37	3.77	1.21486	1.04806	2.26292	545	-1	2016-06-24
144	6	41.4	35.8333	4.16	3.72	1.72224	1.54008	3.26232	540	0	2016-06-25
144	6	38.3	29.4333	4.12	3.87	1.57796	1.48221	3.06017	511	1	2016-06-26
144	6	8.6	22	4.96	4.15	0.42656	0.3569	0.78346	516	2	2016-06-27
144	6	19.1	17.4333	4.98	3.49	0.95118	0.66659	1.61777	520	3	2016-06-28
144	6	24.6	22	4.73	3.4	1.16358	0.8364	1.99998	526	4	2016-06-29
144	6	22.3	23.9667	4.69	3.6	1.04587	0.8028	1.84867	528	5	2016-06-30
144	6	25	23.1333	4.78	3.77	1.195	0.9425	2.1375	534	6	2016-07-01
144	6	22.1	24	4.11	3.84	0.90831	0.84864	1.75695	564	7	2016-07-02
144	6	24.9	23.0333	4.23	3.88	1.05327	0.96612	2.01939	539	8	2016-07-03
144	6	22.1	23.2333	3.93	3.78	0.86853	0.83538	1.70391	535	9	2016-07-04
144	6	22.7	22.4333	3.76	3.84	0.85352	0.87168	1.7252	552	10	2016-07-05
144	6	22.5	23.3	3.71	3.81	0.83475	0.85725	1.692	527	11	2016-07-06
144	6	24.7	23.5	3.78	3.81	0.93366	0.94107	1.87473	547	12	2016-07-07
144	6	23.3	23.7	3.9	3.87	0.9087	0.90171	1.81041	524	13	2016-07-08
144	6	23.1	23.5	3.83	3.89	0.88473	0.89859	1.78332	532	14	2016-07-09
144	6	24.1	23.2333	4.43	3.83	1.06763	0.92303	1.99066	541	15	2016-07-10
144	6	22.5	22.9667	4.16	3.9	0.936	0.8775	1.8135	533	16	2016-07-11
144	6	22.3	23.0667	4.13	3.83	0.92099	0.85409	1.77508	533	17	2016-07-12
144	6	24.4	23.3333	4.45	3.81	1.0858	0.92964	2.01544	539	18	2016-07-13
144	6	23.3	23.7333	4.23	3.77	0.98559	0.87841	1.864	533	19	2016-07-14
144	6	23.5	23.4667	4.25	3.83	0.99875	0.90005	1.8988	530	20	2016-07-15
144	6	23.6	23.7	4.23	3.83	0.99828	0.90388	1.90216	534	21	2016-07-16
144	6	24	23.9	4.36	3.83	1.0464	0.9192	1.9656	537	22	2016-07-17
144	6	24.1	23.9	4.27	3.8	1.02907	0.9158	1.94487	560	23	2016-07-18
144	6	23.6	24.1333	4.31	3.8	1.01716	0.8968	1.91396	531	24	2016-07-19
144	6	24.7	24.3333	4.06	3.8	1.00282	0.9386	1.94142	530	25	2016-07-20
144	6	24.7	24.1333	4.3	3.81	1.0621	0.94107	2.00317	560	26	2016-07-21
144	6	23	24.2	4.04	3.82	0.9292	0.8786	1.8078	534	27	2016-07-22
144	6	24.9	23.9	4.04	3.83	1.00596	0.95367	1.95963	536	28	2016-07-23
144	6	23.8	23.7667	4.56	3.77	1.08528	0.89726	1.98254	542	29	2016-07-24
144	6	22.6	23.8	4.73	3.75	1.06898	0.8475	1.91648	533	30	2016-07-25
144	6	25	23.5667	4.52	3.82	1.13	0.955	2.085	530	31	2016-07-26
144	6	23.1	24.6	4.37	3.81	1.00947	0.88011	1.88958	531	32	2016-07-27
144	6	25.7	24.9667	4.23	3.79	1.08711	0.97403	2.06114	541	33	2016-07-28
144	6	26.1	25.7333	4.3	3.82	1.1223	0.99702	2.11932	557	34	2016-07-29
144	6	25.4	25.0667	4.44	3.91	1.12776	0.99314	2.1209	543	35	2016-07-30
144	6	23.7	23.9333	4.7	4.02	1.1139	0.95274	2.06664	535	36	2016-07-31
144	6	22.7	23.2	4.55	4.03	1.03285	0.91481	1.94766	578	37	2016-08-01
144	6	23.2	22.7333	4.68	3.94	1.08576	0.91408	1.99984	534	38	2016-08-02
144	6	22.3	22.2667	4.64	3.91	1.03472	0.87193	1.90665	587	39	2016-08-03
144	6	21.3	21.8667	4.83	3.99	1.02879	0.84987	1.87866	535	40	2016-08-04
144	6	22	22.3	4.85	3.99	1.067	0.8778	1.9448	536	41	2016-08-05
144	6	23.6	22.5667	4.54	3.9	1.07144	0.9204	1.99184	539	42	2016-08-06
144	6	22.1	22.3333	4.86	3.94	1.07406	0.87074	1.9448	547	43	2016-08-07
144	6	21.3	21.5667	4.9	4	1.0437	0.852	1.8957	544	44	2016-08-08
144	6	21.3	21.3	4.75	3.99	1.01175	0.84987	1.86162	532	45	2016-08-09
144	6	21.3	21.5667	4.7	4	1.0011	0.852	1.8531	539	46	2016-08-10
144	6	22.1	21.9333	4.82	4.01	1.06522	0.88621	1.95143	537	47	2016-08-11
144	6	22.4	21.6	5.01	4.05	1.12224	0.9072	2.02944	582	48	2016-08-12
144	6	20.3	20.8333	5.44	4.09	1.10432	0.83027	1.93459	562	49	2016-08-13
144	6	19.8	21.5333	5.42	4.01	1.07316	0.79398	1.86714	531	50	2016-08-14
144	6	24.5	22.0333	4.79	3.95	1.17355	0.96775	2.1413	545	51	2016-08-15
144	6	21.8	22.9	4.67	3.94	1.01806	0.85892	1.87698	558	52	2016-08-16
144	6	22.4	22.2667	4.68	3.95	1.04832	0.8848	1.93312	538	53	2016-08-17
144	6	22.6	21.8667	4.7	3.96	1.0622	0.89496	1.95716	548	54	2016-08-18
144	6	20.6	21.2667	4.8	3.91	0.9888	0.80546	1.79426	565	55	2016-08-19
144	6	20.6	20.5333	4.37	3.93	0.90022	0.80958	1.7098	534	56	2016-08-20
144	6	20.4	21.0333	4.51	3.94	0.92004	0.80376	1.7238	559	57	2016-08-21
144	6	22.1	21.7333	5.11	3.8	1.12931	0.8398	1.96911	543	58	2016-08-22
144	6	22.7	22.1667	4.99	3.9	1.13273	0.8853	2.01803	545	59	2016-08-23
144	6	21.7	22.2333	4.72	3.96	1.02424	0.85932	1.88356	552	60	2016-08-24
144	6	22.3	21.7667	4.91	3.98	1.09493	0.88754	1.98247	549	61	2016-08-25
144	6	21.3	21.7	4.61	3.98	0.98193	0.84774	1.82967	546	62	2016-08-26
144	6	21.5	21.5333	4.8	3.99	1.032	0.85785	1.88985	537	63	2016-08-27
144	6	21.8	21.6667	4.99	3.94	1.08782	0.85892	1.94674	544	64	2016-08-28
144	6	21.7	21.7667	5	3.94	1.085	0.85498	1.93998	551	65	2016-08-29
144	6	21.8	21.8	4.85	3.94	1.0573	0.85892	1.91622	544	66	2016-08-30
144	6	21.9	21.6667	4.73	3.93	1.03587	0.86067	1.89654	540	67	2016-08-31
144	6	21.3	21.2667	4.78	3.93	1.01814	0.83709	1.85523	554	68	2016-09-01
144	6	20.6	21.4	4.67	3.84	0.96202	0.79104	1.75306	546	69	2016-09-02
144	6	22.3	21.5	4.95	3.85	1.10385	0.85855	1.9624	537	70	2016-09-03
144	6	21.6	21.3	4.94	3.86	1.06704	0.83376	1.9008	546	71	2016-09-04
144	6	20	21.9	4.39	3.88	0.878	0.776	1.654	531	72	2016-09-05
144	6	24.1	21.5667	4.63	3.88	1.11583	0.93508	2.05091	549	73	2016-09-06
144	6	20.6	20.9	4.97	3.78	1.02382	0.77868	1.8025	541	74	2016-09-07
144	6	18	19.6	4.99	3.8	0.8982	0.684	1.5822	547	75	2016-09-08
144	6	20.2	19.6667	5.02	3.78	1.01404	0.76356	1.7776	537	76	2016-09-09
144	6	20.8	20.6667	4.42	3.69	0.91936	0.76752	1.68688	544	77	2016-09-10
144	6	21	21.1	4.55	3.74	0.9555	0.7854	1.7409	560	78	2016-09-11
144	6	21.5	20.9333	4.86	3.81	1.0449	0.81915	1.86405	553	79	2016-09-12
144	6	20.3	20.8	4.93	3.9	1.00079	0.7917	1.79249	551	80	2016-09-13
144	6	20.6	20.4	4.85	3.89	0.9991	0.80134	1.80044	562	81	2016-09-14
144	6	20.3	19.6	4.82	3.9	0.97846	0.7917	1.77016	548	82	2016-09-15
144	6	17.9	19.3	4.19	3.92	0.75001	0.70168	1.45169	555	83	2016-09-16
144	6	19.7	18.9333	4	3.7	0.788	0.7289	1.5169	559	84	2016-09-17
144	6	19.2	19.4	4.51	3.49	0.86592	0.67008	1.536	546	85	2016-09-18
144	6	19.3	18.3	4.37	3.51	0.84341	0.67743	1.52084	540	86	2016-09-19
144	6	16.4	17.8667	4.3	3.54	0.7052	0.58056	1.28576	560	87	2016-09-20
144	6	17.9	17.6333	4.31	3.56	0.77149	0.63724	1.40873	562	88	2016-09-21
144	6	18.6	18.8667	4.44	3.53	0.82584	0.65658	1.48242	552	89	2016-09-22
144	6	20.1	19.4333	4.49	3.53	0.90249	0.70953	1.61202	544	90	2016-09-23
144	6	19.6	19.3667	4.69	3.61	0.91924	0.70756	1.6268	540	91	2016-09-24
144	6	18.4	19.4333	4.56	3.62	0.83904	0.66608	1.50512	528	92	2016-09-25
144	6	20.3	19.6667	4.16	3.62	0.84448	0.73486	1.57934	562	93	2016-09-26
144	6	20.3	20.3	4.11	3.59	0.83433	0.72877	1.5631	556	94	2016-09-27
144	6	20.3	19.9333	4.12	3.62	0.83636	0.73486	1.57122	554	95	2016-09-28
144	6	19.2	20.5667	4.37	3.58	0.83904	0.68736	1.5264	558	96	2016-09-29
144	6	22.2	20.6333	4.5	3.6	0.999	0.7992	1.7982	556	97	2016-09-30
144	6	20.5	20.6667	4.25	3.58	0.87125	0.7339	1.60515	558	98	2016-10-01
144	6	19.3	20.1667	4.1	3.59	0.7913	0.69287	1.48417	559	99	2016-10-02
144	6	20.7	20.6667	4.13	3.5	0.85491	0.7245	1.57941	557	100	2016-10-03
144	6	22	20.3667	4.18	3.49	0.9196	0.7678	1.6874	545	101	2016-10-04
144	6	18.4	20	4.38	3.59	0.80592	0.66056	1.46648	567	102	2016-10-05
144	6	19.6	19.3	4.32	3.58	0.84672	0.70168	1.5484	564	103	2016-10-06
144	6	19.9	19.1667	4.34	3.61	0.86366	0.71839	1.58205	567	104	2016-10-07
144	6	18	18.9333	4.25	3.7	0.765	0.666	1.431	565	105	2016-10-08
144	6	18.9	18.8333	4.44	3.68	0.83916	0.69552	1.53468	568	106	2016-10-09
144	6	19.6	19.7	4.3	3.63	0.8428	0.71148	1.55428	562	107	2016-10-10
144	6	20.6	18.2	4.21	3.66	0.86726	0.75396	1.62122	566	108	2016-10-11
144	6	14.4	16.9	4.01	3.71	0.57744	0.53424	1.11168	548	109	2016-10-12
144	6	15.7	16.1667	4.21	3.63	0.66097	0.56991	1.23088	562	110	2016-10-13
144	6	18.4	17.7	4.53	3.47	0.83352	0.63848	1.472	562	111	2016-10-14
144	6	19	18.7667	4.67	3.61	0.8873	0.6859	1.5732	569	112	2016-10-15
144	6	18.9	18.8333	4.75	3.68	0.89775	0.69552	1.59327	564	113	2016-10-16
144	6	18.6	18.6667	4.68	3.74	0.87048	0.69564	1.56612	573	114	2016-10-17
144	6	18.5	18.7667	4.61	3.66	0.85285	0.6771	1.52995	565	115	2016-10-18
144	6	19.2	17.0667	4.52	3.61	0.86784	0.69312	1.56096	559	116	2016-10-19
144	6	13.5	16.4667	3.67	3.64	0.49545	0.4914	0.98685	568	117	2016-10-20
144	6	16.7	15.3	3.6	3.63	0.6012	0.60621	1.20741	550	118	2016-10-21
144	6	15.7	17.0333	4.06	3.71	0.63742	0.58247	1.21989	622	119	2016-10-22
144	6	18.7	17.6333	4.77	3.58	0.89199	0.66946	1.56145	572	120	2016-10-23
144	6	18.5	18.2333	4.05	3.37	0.74925	0.62345	1.3727	567	121	2016-10-24
144	6	17.5	17.8667	4.21	3.48	0.73675	0.609	1.34575	564	122	2016-10-25
144	6	17.6	17.7333	4.68	3.66	0.82368	0.64416	1.46784	576	123	2016-10-26
144	6	18.1	18.2667	4.43	3.59	0.80183	0.64979	1.45162	570	124	2016-10-27
144	6	19.1	17.8	4.38	3.61	0.83658	0.68951	1.52609	548	125	2016-10-28
144	6	16.2	17.7667	4.65	3.69	0.7533	0.59778	1.35108	563	126	2016-10-29
144	6	18	18.2	5.16	3.66	0.9288	0.6588	1.5876	558	127	2016-10-30
144	6	20.4	18.9333	5.07	3.56	1.03428	0.72624	1.76052	564	128	2016-10-31
144	6	18.4	19.4667	4.7	3.67	0.8648	0.67528	1.54008	568	129	2016-11-01
144	6	19.6	19.5667	4.62	3.72	0.90552	0.72912	1.63464	569	130	2016-11-02
144	6	20.7	19.2	4.76	3.7	0.98532	0.7659	1.75122	572	131	2016-11-03
144	6	17.3	18.6333	4.61	3.77	0.79753	0.65221	1.44974	566	132	2016-11-04
144	6	17.9	17.6333	4.54	3.82	0.81266	0.68378	1.49644	558	133	2016-11-05
144	6	17.7	18.2	5.14	3.87	0.90978	0.68499	1.59477	566	134	2016-11-06
144	6	19	18.2	5.07	3.86	0.9633	0.7334	1.6967	568	135	2016-11-07
144	6	17.9	18.6	4.83	3.92	0.86457	0.70168	1.56625	579	136	2016-11-08
144	6	18.9	18.0333	4.95	3.87	0.93555	0.73143	1.66698	572	137	2016-11-09
144	6	17.3	17.9	4.95	3.82	0.85635	0.66086	1.51721	564	138	2016-11-10
144	6	17.5	17.7	5.03	3.91	0.88025	0.68425	1.5645	577	139	2016-11-11
144	6	18.3	17.8667	4.99	3.89	0.91317	0.71187	1.62504	576	140	2016-11-12
144	6	17.8	18	5.04	3.88	0.89712	0.69064	1.58776	569	141	2016-11-13
144	6	17.9	17.5333	4.82	3.89	0.86278	0.69631	1.55909	593	142	2016-11-14
144	6	16.9	18.0333	4.39	3.93	0.74191	0.66417	1.40608	576	143	2016-11-15
144	6	19.3	17.5667	5.07	4.03	0.97851	0.77779	1.7563	577	144	2016-11-16
144	6	16.5	17.4333	5.33	4	0.87945	0.66	1.53945	571	145	2016-11-17
144	6	16.5	16.5	5.24	3.93	0.8646	0.64845	1.51305	559	146	2016-11-18
144	6	16.5	16.6333	5.41	4.03	0.89265	0.66495	1.5576	587	147	2016-11-19
144	6	16.9	16.7667	5.55	4.11	0.93795	0.69459	1.63254	586	148	2016-11-20
144	6	16.9	16.7333	5.43	4.09	0.91767	0.69121	1.60888	584	149	2016-11-21
144	6	16.4	16.5	5.03	4.05	0.82492	0.6642	1.48912	578	150	2016-11-22
144	6	16.2	16.4	5.05	4.05	0.8181	0.6561	1.4742	590	151	2016-11-23
144	6	16.6	15.5667	5.37	4.09	0.89142	0.67894	1.57036	587	152	2016-11-24
144	6	13.9	15.1333	4.99	4.16	0.69361	0.57824	1.27185	587	153	2016-11-25
144	6	14.9	14.7	5.04	4.14	0.75096	0.61686	1.36782	580	154	2016-11-26
144	6	15.3	15.1	5.82	4.14	0.89046	0.63342	1.52388	587	155	2016-11-27
144	6	15.1	15	5.41	4.09	0.81691	0.61759	1.4345	568	156	2016-11-28
144	6	14.6	15.1	5.4	4.09	0.7884	0.59714	1.38554	634	157	2016-11-29
144	6	15.6	14.1667	5.06	4.06	0.78936	0.63336	1.42272	584	158	2016-11-30
144	6	12.3	13.4333	4.97	4.13	0.61131	0.50799	1.1193	586	159	2016-12-01
144	6	12.4	12.6333	6.74	4.26	0.83576	0.52824	1.364	603	160	2016-12-02
144	6	13.2	13.2333	6.67	4.18	0.88044	0.55176	1.4322	582	161	2016-12-03
144	6	14.1	13.6	6.31	4.15	0.88971	0.58515	1.47486	596	162	2016-12-04
144	6	13.5	13.8	6.34	4.18	0.8559	0.5643	1.4202	553	163	2016-12-05
150	2	13.3	20.65	5.09	5.32	0.67697	0.70756	1.38453		-31	2016-02-04
150	2	28	20	4.43	5.2	1.2404	1.456	2.6964	514	-30	2016-02-05
150	2	18.7	21.6667	4.27	5.14	0.79849	0.96118	1.75967	523	-29	2016-02-06
150	2	18.3	17.8333	4.22	5.04	0.77226	0.92232	1.69458	529	-28	2016-02-07
150	2	16.5	17.2667	4.27	4.89	0.70455	0.80685	1.5114	577	-27	2016-02-08
150	2	17	17.4333	4.56	4.79	0.7752	0.8143	1.5895	527	-26	2016-02-09
150	2	18.8	19.1	5.61	4.65	1.05468	0.8742	1.92888	532	-25	2016-02-10
150	2	21.5	21.3667	5.76	4.6	1.2384	0.989	2.2274	529	-24	2016-02-11
150	2	23.8	21.3333	5.09	4.56	1.21142	1.08528	2.2967	531	-23	2016-02-12
150	2	18.7	21.8667	4.85	4.49	0.90695	0.83963	1.74658	508	-22	2016-02-13
150	2	23.1	21.7333	5.24	4.34	1.21044	1.00254	2.21298	521	-21	2016-02-14
150	2	23.4	23.1333	4.86	4.38	1.13724	1.02492	2.16216	539	-20	2016-02-15
150	2	22.9	23.3333	4.55	4.28	1.04195	0.98012	2.02207	532	-19	2016-02-16
150	2	23.7	22.8	4.47	4.22	1.05939	1.00014	2.05953	525	-18	2016-02-17
150	2	21.8	22.6333	4.72	4.07	1.02896	0.88726	1.91622	525	-17	2016-02-18
150	2	22.4	22.6667	4.7	4.05	1.0528	0.9072	1.96	530	-16	2016-02-19
150	2	23.8	23.4	4.38	4.03	1.04244	0.95914	2.00158	535	-15	2016-02-20
150	2	24	23.8	4.66	4.06	1.1184	0.9744	2.0928	524	-14	2016-02-21
150	2	23.6	23.5667	4.58	3.98	1.08088	0.93928	2.02016	538	-13	2016-02-22
150	2	23.1	23.7333	4.52	3.96	1.04412	0.91476	1.95888	541	-12	2016-02-23
150	2	24.5	24.4667	4.48	3.92	1.0976	0.9604	2.058	532	-11	2016-02-24
150	2	25.8	24.7667	4.56	3.91	1.17648	1.00878	2.18526	534	-10	2016-02-25
150	2	24	24.5333	4.47	4	1.0728	0.96	2.0328	532	-9	2016-02-26
150	2	23.8	23.7	4.36	4.03	1.03768	0.95914	1.99682	539	-8	2016-02-27
150	2	23.3	23.6	4.36	4	1.01588	0.932	1.94788	539	-7	2016-02-28
150	2	23.7	23.7667	4.29	4.02	1.01673	0.95274	1.96947	536	-6	2016-02-29
150	2	24.3	24.0333	4.47	4.05	1.08621	0.98415	2.07036	539	-5	2016-03-01
150	2	24.1	24.2333	4.5	4.06	1.0845	0.97846	2.06296	541	-4	2016-03-02
150	2	24.3	24.3333	4.66	4.08	1.13238	0.99144	2.12382	542	-3	2016-03-03
150	2	24.6	24.6667	4.51	4.09	1.10946	1.00614	2.1156	540	-2	2016-03-04
150	2	25.1	24.9333	4.61	4.09	1.15711	1.02659	2.1837	545	-1	2016-03-05
150	2	25.1	24.9667	4.71	4.11	1.18221	1.03161	2.21382	544	0	2016-03-06
150	2	24.7	24.9667	4.68	4.12	1.15596	1.01764	2.1736	543	1	2016-03-07
150	2	25.1	24.8333	4.77	4.12	1.19727	1.03412	2.23139	547	2	2016-03-08
150	2	24.7	24.1	4.58	4.15	1.13126	1.02505	2.15631	545	3	2016-03-09
150	2	22.5	23.7333	4.81	4.24	1.08225	0.954	2.03625	519	4	2016-03-10
150	2	24	23.6667	5.5	4.1	1.32	0.984	2.304	542	5	2016-03-11
150	2	24.5	24	5.03	4.08	1.23235	0.9996	2.23195	538	6	2016-03-12
150	2	23.5	24.3	4.91	4.15	1.15385	0.97525	2.1291	540	7	2016-03-13
150	2	24.9	24.2333	4.86	4.23	1.21014	1.05327	2.26341	539	8	2016-03-14
150	2	24.3	24.4667	5.12	4.33	1.24416	1.05219	2.29635	540	9	2016-03-15
150	2	24.2	24.3667	4.9	4.33	1.1858	1.04786	2.23366	548	10	2016-03-16
150	2	24.6	24.4333	5.44	4.33	1.33824	1.06518	2.40342	542	11	2016-03-17
150	2	24.5	24.5333	5.2	4.33	1.274	1.06085	2.33485	549	12	2016-03-18
150	2	24.5	24.2333	5.26	4.36	1.2887	1.0682	2.3569	543	13	2016-03-19
150	2	23.7	23.9333	5.54	4.39	1.31298	1.04043	2.35341	541	14	2016-03-20
150	2	23.6	23	5.1	4.35	1.2036	1.0266	2.2302	552	15	2016-03-21
150	2	21.7	22.8	5.11	4.3	1.10887	0.9331	2.04197	557	16	2016-03-22
150	2	23.1	22.6	5.49	4.29	1.26819	0.99099	2.25918	557	17	2016-03-23
150	2	23	23.2667	5.4	4.31	1.242	0.9913	2.2333	549	18	2016-03-24
150	2	23.7	23.3667	5.55	4.37	1.31535	1.03569	2.35104	554	19	2016-03-25
150	2	23.4	23.2667	5.51	4.35	1.28934	1.0179	2.30724	545	20	2016-03-26
150	2	22.7	23.1	5.64	4.4	1.28028	0.9988	2.27908	539	21	2016-03-27
150	2	23.2	22.9667	5.42	4.4	1.25744	1.0208	2.27824	550	22	2016-03-28
150	2	23	23.3667	5.22	4.35	1.2006	1.0005	2.2011	549	23	2016-03-29
150	2	23.9	23.0667	5.72	4.44	1.36708	1.06116	2.42824	549	24	2016-03-30
150	2	22.3	23.4333	5.8	4.47	1.2934	0.99681	2.29021	526	25	2016-03-31
150	2	24.1	23.2333	6.14	4.5	1.47974	1.0845	2.56424	546	26	2016-04-01
150	2	23.3	23.5667	5.66	4.51	1.31878	1.05083	2.36961	559	27	2016-04-02
150	2	23.3	23.1333	5.15	4.47	1.19995	1.04151	2.24146	555	28	2016-04-03
150	2	22.8	22.7	4.96	4.4	1.13088	1.0032	2.13408	560	29	2016-04-04
150	2	22	22.5	5.34	4.41	1.1748	0.9702	2.145	557	30	2016-04-05
150	2	22.7	22.3	5.22	4.37	1.18494	0.99199	2.17693	561	31	2016-04-06
150	2	22.2	22.5333	5.81	4.42	1.28982	0.98124	2.27106	557	32	2016-04-07
150	2	22.7	22.1	6.07	4.48	1.37789	1.01696	2.39485	561	33	2016-04-08
150	2	21.4	21.8	5.52	4.44	1.18128	0.95016	2.13144	555	34	2016-04-09
150	2	21.3	21.4	5.51	4.4	1.17363	0.9372	2.11083	554	35	2016-04-10
150	2	21.5	20.6667	5.88	4.38	1.2642	0.9417	2.2059	560	36	2016-04-11
150	2	19.2	20.2667	5.85	4.38	1.1232	0.84096	1.96416	560	37	2016-04-12
150	2	20.1	20.0667	5.73	4.37	1.15173	0.87837	2.0301	551	38	2016-04-13
150	2	20.9	20.6333	6.13	4.4	1.28117	0.9196	2.20077	555	39	2016-04-14
150	2	20.9	20.6	6.3	4.45	1.3167	0.93005	2.24675	556	40	2016-04-15
150	2	20	20.5	5.94	4.49	1.188	0.898	2.086	552	41	2016-04-16
150	2	20.6	20.6667	5.55	4.47	1.1433	0.92082	2.06412	562	42	2016-04-17
150	2	21.4	21.3333	5.63	4.48	1.20482	0.95872	2.16354	565	43	2016-04-18
150	2	22	17.8667	5.83	4.47	1.2826	0.9834	2.266	554	44	2016-04-19
150	2	10.2	14.7333	5.35	4.52	0.5457	0.46104	1.00674	548	45	2016-04-20
150	2	12	12.8333	6.81	4.4	0.8172	0.528	1.3452	549	46	2016-04-21
150	2	16.3	15.5667	8.02	4.14	1.30726	0.67482	1.98208	549	47	2016-04-22
150	2	18.4	17.7	6.95	4.31	1.2788	0.79304	2.07184	561	48	2016-04-23
150	2	18.4	17.9333	5.81	4.41	1.06904	0.81144	1.88048	571	49	2016-04-24
150	2	17	18.2	5.63	4.45	0.9571	0.7565	1.7136	553	50	2016-04-25
150	2	19.2	18.1	5.6	4.45	1.0752	0.8544	1.9296	549	51	2016-04-26
150	2	18.1	18.3	6.5	4.48	1.1765	0.81088	1.98738	555	52	2016-04-27
150	2	17.6	17.4667	6.55	4.5	1.1528	0.792	1.9448	552	53	2016-04-28
150	2	16.7	16.7667	5.96	4.49	0.99532	0.74983	1.74515	549	54	2016-04-29
150	2	16	16.7667	5.82	4.46	0.9312	0.7136	1.6448	557	55	2016-04-30
150	2	17.6	17.5333	5.84	4.41	1.02784	0.77616	1.804	565	56	2016-05-01
150	2	19	14.5333	5.54	4.35	1.0526	0.8265	1.8791	641	57	2016-05-02
150	2	7	12.5	5.77	4.49	0.4039	0.3143	0.7182	521	58	2016-05-03
150	2	11.5	11.3	6.1	4.42	0.7015	0.5083	1.2098	541	59	2016-05-04
150	2	15.4	14.9	6.48	4.3	0.99792	0.6622	1.66012	552	60	2016-05-05
150	2	17.8	17.2333	6.44	4.25	1.14632	0.7565	1.90282	556	61	2016-05-06
150	2	18.5	18.1	6.47	4.49	1.19695	0.83065	2.0276	566	62	2016-05-07
150	2	18	18.5	6.61	4.6	1.1898	0.828	2.0178	546	63	2016-05-08
150	2	19	19.0667	6.57	4.63	1.2483	0.8797	2.128	548	64	2016-05-09
150	2	20.2	19.6	6.16	4.6	1.24432	0.9292	2.17352	569	65	2016-05-10
150	2	19.6	19.7667	5.81	4.6	1.13876	0.9016	2.04036	547	66	2016-05-11
150	2	19.5	19.5	5.72	4.6	1.1154	0.897	2.0124	569	67	2016-05-12
150	2	19.4	18.9667	5.62	4.55	1.09028	0.8827	1.97298	559	68	2016-05-13
150	2	18	18.4667	6.07	4.51	1.0926	0.8118	1.9044	554	69	2016-05-14
150	2	18	18.4333	6.43	4.45	1.1574	0.801	1.9584	562	70	2016-05-15
150	2	19.3	18.9333	6.2	4.46	1.1966	0.86078	2.05738	564	71	2016-05-16
150	2	19.5	18.9333	5.84	4.45	1.1388	0.86775	2.00655	569	72	2016-05-17
150	2	18	18.7	6.03	4.43	1.0854	0.7974	1.8828	556	73	2016-05-18
150	2	18.6	18.8333	5.97	4.39	1.11042	0.81654	1.92696	571	74	2016-05-19
150	2	19.9	19.4333	5.87	4.37	1.16813	0.86963	2.03776	569	75	2016-05-20
150	2	19.8	19.7667	5.88	4.41	1.16424	0.87318	2.03742	567	76	2016-05-21
150	2	19.6	19.7667	5.88	4.42	1.15248	0.86632	2.0188	558	77	2016-05-22
150	2	19.9	19.6	5.91	4.41	1.17609	0.87759	2.05368	572	78	2016-05-23
150	2	19.3	19.5667	6.03	4.42	1.16379	0.85306	2.01685	565	79	2016-05-24
150	2	19.5	19.3	6.1	4.41	1.1895	0.85995	2.04945	561	80	2016-05-25
150	2	19.1	19.5	6.01	4.35	1.14791	0.83085	1.97876	563	81	2016-05-26
150	2	19.9	19.1333	5.53	4.3	1.10047	0.8557	1.95617	570	82	2016-05-27
150	2	18.4	17.5333	5.73	4.37	1.05432	0.80408	1.8584	574	83	2016-05-28
150	2	14.3	15.8333	5.35	4.35	0.76505	0.62205	1.3871	557	84	2016-05-29
150	2	14.8	15.2	5.7	4.28	0.8436	0.63344	1.47704	555	85	2016-05-30
150	2	16.5	15.5333	6.29	4.18	1.03785	0.6897	1.72755	553	86	2016-05-31
150	2	15.3	16.1667	5.77	4.18	0.88281	0.63954	1.52235	556	87	2016-06-01
150	2	16.7	16.4	5.86	4.21	0.97862	0.70307	1.68169	563	88	2016-06-02
150	2	17.2	17.2	5.89	4.31	1.01308	0.74132	1.7544	563	89	2016-06-03
150	2	17.7	17.5	5.64	4.38	0.99828	0.77526	1.77354	572	90	2016-06-04
150	2	17.6	17.5667	5.52	4.42	0.97152	0.77792	1.74944	567	91	2016-06-05
150	2	17.4	16.0667	5.66	4.42	0.98484	0.76908	1.75392	568	92	2016-06-06
150	2	13.2	15.5333	5.35	4.32	0.7062	0.57024	1.27644	564	93	2016-06-07
150	2	16	15.4	5.65	4.27	0.904	0.6832	1.5872	575	94	2016-06-08
150	2	17	16.7	6.43	4.26	1.0931	0.7242	1.8173	569	95	2016-06-09
150	2	17.1	16.8667	6.21	4.3	1.06191	0.7353	1.79721	563	96	2016-06-10
150	2	16.5	16.9667	5.87	4.36	0.96855	0.7194	1.68795	562	97	2016-06-11
150	2	17.3	16.9	5.82	4.43	1.00686	0.76639	1.77325	568	98	2016-06-12
150	2	16.9	17.1667	5.8	4.45	0.9802	0.75205	1.73225	572	99	2016-06-13
150	2	17.3	16.9	5.99	4.42	1.03627	0.76466	1.80093	566	100	2016-06-14
150	2	16.5	17.0333	6.03	4.42	0.99495	0.7293	1.72425	564	101	2016-06-15
150	2	17.3	16.8333	6.15	4.41	1.06395	0.76293	1.82688	568	102	2016-06-16
150	2	16.7	16.6667	6.07	4.35	1.01369	0.72645	1.74014	575	103	2016-06-17
150	2	16	16.7	5.97	4.29	0.9552	0.6864	1.6416	558	104	2016-06-18
150	2	17.4	16.7333	5.8	4.25	1.0092	0.7395	1.7487	557	105	2016-06-19
150	2	16.8	17.4667	5.8	4.29	0.9744	0.72072	1.69512	564	106	2016-06-20
150	2	18.2	17.7667	5.81	4.29	1.05742	0.78078	1.8382	567	107	2016-06-21
150	2	18.3	18	5.75	4.34	1.05225	0.79422	1.84647	558	108	2016-06-22
150	2	17.5	17.7667	5.5	4.31	0.9625	0.75425	1.71675	558	109	2016-06-23
150	2	17.5	17.5667	5.6	4.24	0.98	0.742	1.722	557	110	2016-06-24
150	2	17.7	18.2	5.58	4.2	0.98766	0.7434	1.73106	561	111	2016-06-25
150	2	19.4	18.5667	5.88	4.22	1.14072	0.81868	1.9594	564	112	2016-06-26
150	2	18.6	18.9667	5.9	4.23	1.0974	0.78678	1.88418	558	113	2016-06-27
150	2	18.9	18.8667	5.91	4.22	1.11699	0.79758	1.91457	564	114	2016-06-28
150	2	19.1	19.0333	5.81	4.23	1.10971	0.80793	1.91764	556	115	2016-06-29
150	2	19.1	19.2	5.92	4.22	1.13072	0.80602	1.93674	556	116	2016-06-30
150	2	19.4	18.9333	5.73	4.19	1.11162	0.81286	1.92448	556	117	2016-07-01
150	2	18.3	19	5.47	4.18	1.00101	0.76494	1.76595	554	118	2016-07-02
150	2	19.3	18.9333	5.74	4.18	1.10782	0.80674	1.91456	556	119	2016-07-03
150	2	19.2	19.4333	5.74	4.14	1.10208	0.79488	1.89696	559	120	2016-07-04
150	2	19.8	19.7333	5.76	4.17	1.14048	0.82566	1.96614	552	121	2016-07-05
150	2	20.2	19.9333	5.72	4.2	1.15544	0.8484	2.00384	564	122	2016-07-06
150	2	19.8	20.1667	5.75	4.16	1.1385	0.82368	1.96218	563	123	2016-07-07
150	2	20.5	19.8333	5.77	4.14	1.18285	0.8487	2.03155	567	124	2016-07-08
150	2	19.2	19.7	5.92	4.17	1.13664	0.80064	1.93728	561	125	2016-07-09
150	2	19.4	19.2667	5.91	4.16	1.14654	0.80704	1.95358	568	126	2016-07-10
150	2	19.2	19.4333	5.5	4.12	1.056	0.79104	1.84704	568	127	2016-07-11
150	2	19.7	19.3	5.68	4.16	1.11896	0.81952	1.93848	565	128	2016-07-12
150	2	19	19.2667	5.63	4.14	1.0697	0.7866	1.8563	567	129	2016-07-13
150	2	19.1	19.2	5.73	4.12	1.09443	0.78692	1.88135	562	130	2016-07-14
150	2	19.5	19.3	5.76	4.11	1.1232	0.80145	1.92465	560	131	2016-07-15
150	2	19.3	19.3333	5.84	4.16	1.12712	0.80288	1.93	565	132	2016-07-16
150	2	19.2	19.3	5.59	4.19	1.07328	0.80448	1.87776	557	133	2016-07-17
150	2	19.4	19.4333	5.69	4.18	1.10386	0.81092	1.91478	559	134	2016-07-18
150	2	19.7	19.4	5.98	4.17	1.17806	0.82149	1.99955	561	135	2016-07-19
150	2	19.1	19.4333	5.85	4.19	1.11735	0.80029	1.91764	561	136	2016-07-20
150	2	19.5	19.3	5.73	4.19	1.11735	0.81705	1.9344	570	137	2016-07-21
150	2	19.3	18.9667	5.68	4.18	1.09624	0.80674	1.90298	558	138	2016-07-22
150	2	18.1	18.7667	5.98	4.21	1.08238	0.76201	1.84439	569	139	2016-07-23
150	2	18.9	18.5667	6.13	4.22	1.15857	0.79758	1.95615	568	140	2016-07-24
150	2	18.7	18.8667	6.15	4.18	1.15005	0.78166	1.93171	566	141	2016-07-25
150	2	19	18.5667	6.14	4.23	1.1666	0.8037	1.9703	556	142	2016-07-26
150	2	18	18.8333	6.43	4.27	1.1574	0.7686	1.926	558	143	2016-07-27
150	2	19.5	18.8667	6.07	4.21	1.18365	0.82095	2.0046	570	144	2016-07-28
150	2	19.1	17.4667	5.66	4.25	1.08106	0.81175	1.89281	568	145	2016-07-29
150	2	13.8	16.8	5.83	4.34	0.80454	0.59892	1.40346	567	146	2016-07-30
150	2	17.5	16.1	6.28	4.38	1.099	0.7665	1.8655	565	147	2016-07-31
150	2	17	17.1667	6.19	4.38	1.0523	0.7446	1.7969	569	148	2016-08-01
150	2	17	17.2333	6.22	4.36	1.0574	0.7412	1.7986	565	149	2016-08-02
150	2	17.7	17.3	6.28	4.36	1.11156	0.77172	1.88328	573	150	2016-08-03
150	2	17.2	17.4333	6.23	4.39	1.07156	0.75508	1.82664	567	151	2016-08-04
150	2	17.4	17.3333	6.24	4.41	1.08576	0.76734	1.8531	566	152	2016-08-05
150	2	17.4	17.1	6.16	4.41	1.07184	0.76734	1.83918	569	153	2016-08-06
150	2	16.5	17.1333	6.1	4.39	1.0065	0.72435	1.73085	570	154	2016-08-07
150	2	17.5	16.9667	6.32	4.35	1.106	0.76125	1.86725	567	155	2016-08-08
150	2	16.9	17.1333	6.47	4.37	1.09343	0.73853	1.83196	567	156	2016-08-09
150	2	17	16.8667	6.37	4.41	1.0829	0.7497	1.8326	565	157	2016-08-10
150	2	16.7	17.0333	6.16	4.42	1.02872	0.73814	1.76686	570	158	2016-08-11
150	2	17.4	17.0667	6.4	4.47	1.1136	0.77778	1.89138	569	159	2016-08-12
150	2	17.1	17.0667	6.32	4.48	1.08072	0.76608	1.8468	568	160	2016-08-13
150	2	16.7	16.4	6.55	4.43	1.09385	0.73981	1.83366	562	161	2016-08-14
150	2	15.4	16.1333	6.52	4.37	1.00408	0.67298	1.67706	569	162	2016-08-15
150	2	16.3	16.5667	6.4	4.36	1.0432	0.71068	1.75388	567	163	2016-08-16
150	2	18	17.1667	6.42	4.39	1.1556	0.7902	1.9458	571	164	2016-08-17
150	2	17.2	17.3667	6.3	4.38	1.0836	0.75336	1.83696	566	165	2016-08-18
150	2	16.9	16.9667	6.22	4.33	1.05118	0.73177	1.78295	561	166	2016-08-19
150	2	16.8	17.2	6.04	4.32	1.01472	0.72576	1.74048	563	167	2016-08-20
150	2	17.9	17.2333	6.11	4.34	1.09369	0.77686	1.87055	566	168	2016-08-21
150	2	17	17	6.44	4.34	1.0948	0.7378	1.8326	565	169	2016-08-22
150	2	16.1	16.3333	6.26	4.31	1.00786	0.69391	1.70177	562	170	2016-08-23
150	2	15.9	16.0333	5.88	4.25	0.93492	0.67575	1.61067	562	171	2016-08-24
150	2	16.1	15.7	5.79	4.19	0.93219	0.67459	1.60678	561	172	2016-08-25
150	2	15.1	16.0667	5.52	4.1	0.83352	0.6191	1.45262	567	173	2016-08-26
150	2	17	16.3333	5.46	4.04	0.9282	0.6868	1.615	564	174	2016-08-27
150	2	16.9	16.7333	5.47	4.05	0.92443	0.68445	1.60888	571	175	2016-08-28
150	2	16.3	16.6333	5.49	4.08	0.89487	0.66504	1.55991	571	176	2016-08-29
150	2	16.7	16.2	5.52	4.09	0.92184	0.68303	1.60487	564	177	2016-08-30
150	2	15.6	16.1667	5.23	4.06	0.81588	0.63336	1.44924	563	178	2016-08-31
150	2	16.2	15.9333	5.3	4.06	0.8586	0.65772	1.51632	566	179	2016-09-01
150	2	16	16	5.55	4.04	0.888	0.6464	1.5344	568	180	2016-09-02
150	2	15.8	16.1333	5.52	4.03	0.87216	0.63674	1.5089	570	181	2016-09-03
150	2	16.6	15.9333	5.52	4	0.91632	0.664	1.58032	565	182	2016-09-04
150	2	15.4	15.9	5.59	3.98	0.86086	0.61292	1.47378	562	183	2016-09-05
150	2	15.7	15.5667	5.57	3.96	0.87449	0.62172	1.49621	557	184	2016-09-06
150	2	15.6	15.4	5.68	3.93	0.88608	0.61308	1.49916	560	185	2016-09-07
150	2	14.9	15.4333	5.63	3.9	0.83887	0.5811	1.41997	552	186	2016-09-08
150	2	15.8	15.4	5.5	3.86	0.869	0.60988	1.47888	561	187	2016-09-09
150	2	15.5	15.3667	5.68	3.89	0.8804	0.60295	1.48335	570	188	2016-09-10
150	2	14.8	15.0667	5.49	3.92	0.81252	0.58016	1.39268	604	189	2016-09-11
150	2	14.9	15.0333	5.52	3.93	0.82248	0.58557	1.40805	572	190	2016-09-12
150	2	15.4	15.7667	5.65	3.97	0.8701	0.61138	1.48148	572	191	2016-09-13
150	2	17	16.2	5.7	4.02	0.969	0.6834	1.6524	576	192	2016-09-14
150	2	16.2	16.5667	5.71	4.07	0.92502	0.65934	1.58436	571	193	2016-09-15
150	2	16.5	16.4333	5.75	4.08	0.94875	0.6732	1.62195	573	194	2016-09-16
150	2	16.6	16.7667	5.73	4.04	0.95118	0.67064	1.62182	567	195	2016-09-17
150	2	17.2	16.8333	5.54	4.01	0.95288	0.68972	1.6426	573	196	2016-09-18
150	2	16.7	16.7333	5.45	4.01	0.91015	0.66967	1.57982	566	197	2016-09-19
150	2	16.3	16.4333	5.32	3.91	0.86716	0.63733	1.50449	565	198	2016-09-20
150	2	16.3	16.2333	5.39	3.85	0.87857	0.62755	1.50612	567	199	2016-09-21
150	2	16.1	16.3333	5.28	3.84	0.85008	0.61824	1.46832	573	200	2016-09-22
150	2	16.6	16.2333	5.46	3.89	0.90636	0.64574	1.5521	568	201	2016-09-23
150	2	16	16.0667	5.49	3.91	0.8784	0.6256	1.504	569	202	2016-09-24
150	2	15.6	15.7667	5.37	3.86	0.83772	0.60216	1.43988	570	203	2016-09-25
150	2	15.7	15.2333	5.3	3.79	0.8321	0.59503	1.42713	566	204	2016-09-26
150	2	14.4	15.4333	5.14	3.82	0.74016	0.55008	1.29024	578	205	2016-09-27
150	2	16.2	15.6667	5.43	3.9	0.87966	0.6318	1.51146	567	206	2016-09-28
150	2	16.4	16.2333	5.82	3.93	0.95448	0.64452	1.599	577	207	2016-09-29
150	2	16.1	16.1333	5.68	3.94	0.91448	0.63434	1.54882	579	208	2016-09-30
150	2	15.9	15.6	5.62	3.97	0.89358	0.63123	1.52481	575	209	2016-10-01
150	2	14.8	15.4333	5.83	3.96	0.86284	0.58608	1.44892	585	210	2016-10-02
150	2	15.6	15.2667	5.59	3.94	0.87204	0.61464	1.48668	580	211	2016-10-03
150	2	15.4	15.3667	5.91	3.98	0.91014	0.61292	1.52306	585	212	2016-10-04
150	2	15.1	15.0667	6.2	4.01	0.9362	0.60551	1.54171	575	213	2016-10-05
150	2	14.7	15	6.12	4.01	0.89964	0.58947	1.48911	571	214	2016-10-06
150	2	15.2	15.0333	5.92	4.01	0.89984	0.60952	1.50936	576	215	2016-10-07
150	2	15.2	15.3667	5.95	4	0.9044	0.608	1.5124	579	216	2016-10-08
150	2	15.7	15.6	5.42	3.89	0.85094	0.61073	1.46167	592	217	2016-10-09
150	2	15.9	15.4	5.44	3.9	0.86496	0.6201	1.48506	567	218	2016-10-10
150	2	14.6	14.8	5.49	3.9	0.80154	0.5694	1.37094	568	219	2016-10-11
150	2	13.9	14.1667	5.45	3.88	0.75755	0.53932	1.29687	570	220	2016-10-12
150	2	14	14.2	5.43	3.86	0.7602	0.5404	1.3006	570	221	2016-10-13
150	2	14.7	14.5333	5.61	3.88	0.82467	0.57036	1.39503	583	222	2016-10-14
150	2	14.9	14.7	5.74	3.94	0.85526	0.58706	1.44232	575	223	2016-10-15
150	2	14.5	14.5667	5.71	3.95	0.82795	0.57275	1.4007	580	224	2016-10-16
150	2	14.3	14.5667	5.54	3.91	0.79222	0.55913	1.35135	578	225	2016-10-17
150	2	14.9	14.6667	5.55	3.89	0.82695	0.57961	1.40656	610	226	2016-10-18
150	2	14.8	14.5667	5.77	3.88	0.85396	0.57424	1.4282	576	227	2016-10-19
150	2	14	14.9	5.67	3.87	0.7938	0.5418	1.3356	584	228	2016-10-20
150	2	15.9	14.8667	5.55	3.84	0.88245	0.61056	1.49301	577	229	2016-10-21
150	2	14.7	14.2667	5.62	3.83	0.82614	0.56301	1.38915	558	230	2016-10-22
150	2	12.2	13.4333	5.92	3.83	0.72224	0.46726	1.1895	561	231	2016-10-23
150	2	13.4	13.0667	5.64	3.77	0.75576	0.50518	1.26094	570	232	2016-10-24
150	2	13.6	13.8	5.68	3.75	0.77248	0.51	1.28248	575	233	2016-10-25
150	2	14.4	14.1667	5.46	3.75	0.78624	0.54	1.32624	564	234	2016-10-26
150	2	14.5	14.3667	5.96	3.83	0.8642	0.55535	1.41955	573	235	2016-10-27
150	2	14.2	14.5333	5.89	3.88	0.83638	0.55096	1.38734	576	236	2016-10-28
150	2	14.9	14.9	6.31	3.97	0.94019	0.59153	1.53172	562	237	2016-10-29
150	2	15.6	15.0333	6.1	4.02	0.9516	0.62712	1.57872	579	238	2016-10-30
150	2	14.6	15.1	5.68	4.05	0.82928	0.5913	1.42058	578	239	2016-10-31
150	2		10.8			0	0	0		240	2016-11-01
150	2	7	7.45	6.34	4.23	0.4438	0.2961	0.7399		241	2016-11-02
150	2	7.9	8.46667	7.42	4.3	0.58618	0.3397	0.92588	553	242	2016-11-03
150	2	10.5	9.93333	7.42	4.2	0.7791	0.441	1.2201	555	243	2016-11-04
150	2	11.4	10.7333	7.65	4.1	0.8721	0.4674	1.3395	543	244	2016-11-05
150	2	10.3	10.85	7.19	3.93	0.74057	0.40479	1.14536	539	245	2016-11-06
164	1	7.1	8.5	3.46	3.7	0.24566	0.2627	0.50836		-34	2016-02-15
164	1	9.9	9.43333	5.44	4.51	0.53856	0.44649	0.98505	369	-33	2016-02-16
164	1	11.3	10.7667	5.88	4.65	0.66444	0.52545	1.18989	361	-32	2016-02-17
164	1	11.1	11.3333	6.15	4.71	0.68265	0.52281	1.20546	366	-31	2016-02-18
164	1	11.6	11.7333	5.63	4.38	0.65308	0.50808	1.16116	360	-30	2016-02-19
164	1	12.5	12.2333	5.38	4.18	0.6725	0.5225	1.195	364	-29	2016-02-20
164	1	12.6	12.8667	5.16	4.11	0.65016	0.51786	1.16802	360	-28	2016-02-21
164	1	13.5	13.2	5.09	4.06	0.68715	0.5481	1.23525	365	-27	2016-02-22
164	1	13.5	13.7333	4.92	4.04	0.6642	0.5454	1.2096	361	-26	2016-02-23
164	1	14.2	14	4.89	4.02	0.69438	0.57084	1.26522	360	-25	2016-02-24
164	1	14.3	14.1333	4.8	4.03	0.6864	0.57629	1.26269	366	-24	2016-02-25
164	1	13.9	13.5	4.21	4.02	0.58519	0.55878	1.14397	356	-23	2016-02-26
164	1	12.3	12.4667	3.73	4.01	0.45879	0.49323	0.95202	369	-22	2016-02-27
164	1	11.2	11.6667	3.88	3.99	0.43456	0.44688	0.88144	369	-21	2016-02-28
164	1	11.5	11.6333	3.99	3.97	0.45885	0.45655	0.9154	364	-20	2016-02-29
164	1	12.2	11.6667	4.03	3.94	0.49166	0.48068	0.97234	363	-19	2016-03-01
164	1	11.3	12.4333	4.46	3.87	0.50398	0.43731	0.94129	367	-18	2016-03-02
164	1	13.8	13.1333	4.53	3.81	0.62514	0.52578	1.15092	359	-17	2016-03-03
164	1	14.3	14.5	4.57	3.79	0.65351	0.54197	1.19548	444	-16	2016-03-04
164	1	15.4	15.4	4.28	3.84	0.65912	0.59136	1.25048	364	-15	2016-03-05
164	1	16.5	16.3	4.04	3.88	0.6666	0.6402	1.3068	456	-14	2016-03-06
164	1	17	15.4667	4.1	3.87	0.697	0.6579	1.3549	361	-13	2016-03-07
164	1	12.9	14.4667	3.87	3.91	0.49923	0.50439	1.00362	352	-12	2016-03-08
164	1	13.5	13.9667	4.38	3.77	0.5913	0.50895	1.10025	362	-11	2016-03-09
164	1	15.5	16.3	4.27	3.68	0.66185	0.5704	1.23225	372	-10	2016-03-10
164	1	19.9	17.2333	4.52	3.58	0.89948	0.71242	1.6119	365	-9	2016-03-11
164	1	16.3	17.7333	4.85	3.66	0.79055	0.59658	1.38713	375	-8	2016-03-12
164	1	17	16.7	4.38	3.63	0.7446	0.6171	1.3617	364	-7	2016-03-13
164	1	16.8	16.7667	4.28	3.7	0.71904	0.6216	1.34064	374	-6	2016-03-14
164	1	16.5	15.9	4.13	3.85	0.68145	0.63525	1.3167	370	-5	2016-03-15
164	1	14.4	14.9333	3.9	3.91	0.5616	0.56304	1.12464	384	-4	2016-03-16
164	1	13.9	14.8	4.27	3.82	0.59353	0.53098	1.12451	376	-3	2016-03-17
164	1	16.1	15.9333	4.35	3.71	0.70035	0.59731	1.29766	426	-2	2016-03-18
164	1	17.8	17.4	4.13	3.67	0.73514	0.65326	1.3884	381	-1	2016-03-19
164	1	18.3	17.9667	4.22	3.85	0.77226	0.70455	1.47681	377	0	2016-03-20
164	1	17.8	17.7	4.37	3.93	0.77786	0.69954	1.4774	381	1	2016-03-21
164	1	17	17.6	4.5	3.89	0.765	0.6613	1.4263	379	2	2016-03-22
164	1	18	17.4667	4.39	3.85	0.7902	0.693	1.4832	379	3	2016-03-23
164	1	17.4	17.6667	4.32	3.84	0.75168	0.66816	1.41984	382	4	2016-03-24
164	1	17.6	17.3	3.67	3.89	0.64592	0.68464	1.33056	381	5	2016-03-25
164	1	16.9	16.7667	4.35	3.9	0.73515	0.6591	1.39425	382	6	2016-03-26
164	1	15.8	16	5.16	3.79	0.81528	0.59882	1.4141	377	7	2016-03-27
164	1	15.3	15.5667	4.9	3.67	0.7497	0.56151	1.31121	361	8	2016-03-28
164	1	15.6	15.3333	4.77	3.66	0.74412	0.57096	1.31508	376	9	2016-03-29
164	1	15.1	15.4333	5.13	3.68	0.77463	0.55568	1.33031	378	10	2016-03-30
164	1	15.6	15.5333	5.02	3.8	0.78312	0.5928	1.37592	434	11	2016-03-31
164	1	15.9	15.9333	4.74	3.88	0.75366	0.61692	1.37058	383	12	2016-04-01
164	1	16.3	16.4	4.72	3.88	0.76936	0.63244	1.4018	378	13	2016-04-02
164	1	17	16.6	4.74	3.87	0.8058	0.6579	1.4637	387	14	2016-04-03
164	1	16.5	16.4333	4.77	3.83	0.78705	0.63195	1.419	380	15	2016-04-04
164	1	15.8	15.9667	4.59	3.87	0.72522	0.61146	1.33668	399	16	2016-04-05
164	1	15.6	16.1	4.72	3.85	0.73632	0.6006	1.33692	388	17	2016-04-06
164	1	16.9	16.1333	4.55	3.84	0.76895	0.64896	1.41791	397	18	2016-04-07
164	1	15.9	16.0667	4.4	3.85	0.6996	0.61215	1.31175	394	19	2016-04-08
164	1	15.4	15.5333	4.42	3.9	0.68068	0.6006	1.28128	401	20	2016-04-09
164	1	15.3	15.5333	4.48	3.91	0.68544	0.59823	1.28367	400	21	2016-04-10
164	1	15.9	15.6333	4.68	3.84	0.74412	0.61056	1.35468	396	22	2016-04-11
164	1	15.7	15.9333	4.78	3.8	0.75046	0.5966	1.34706	396	23	2016-04-12
164	1	16.2	15.8333	4.78	3.83	0.77436	0.62046	1.39482	391	24	2016-04-13
164	1	15.6	14.6	4.59	3.85	0.71604	0.6006	1.31664	434	25	2016-04-14
164	1	12	13.3333	4.14	3.91	0.4968	0.4692	0.966	408	26	2016-04-15
164	1	12.4	12.9	4.77	3.92	0.59148	0.48608	1.07756	596	27	2016-04-16
164	1	14.3	14	4.71	3.85	0.67353	0.55055	1.22408	404	28	2016-04-17
164	1	15.3	14.6667	5.14	3.73	0.78642	0.57069	1.35711	392	29	2016-04-18
164	1	14.4	14.9333	5.18	3.71	0.74592	0.53424	1.28016	390	30	2016-04-19
164	1	15.1	14.6667	5.24	3.74	0.79124	0.56474	1.35598	377	31	2016-04-20
164	1	14.5	14.9333	5.58	3.76	0.8091	0.5452	1.3543	400	32	2016-04-21
164	1	15.2	14.8	5.39	3.81	0.81928	0.57912	1.3984	396	33	2016-04-22
164	1	14.7	15.1333	5.2	3.88	0.7644	0.57036	1.33476	401	34	2016-04-23
164	1	15.5	14.9	5.1	3.93	0.7905	0.60915	1.39965	405	35	2016-04-24
164	1	14.5	13.8667	4.89	3.98	0.70905	0.5771	1.28615	406	36	2016-04-25
164	1	11.6	12.8333	4.33	3.99	0.50228	0.46284	0.96512	412	37	2016-04-26
164	1	12.4	11.9	4.32	3.99	0.53568	0.49476	1.03044	415	38	2016-04-27
164	1	11.7	12.6667	4.78	3.84	0.55926	0.44928	1.00854	425	39	2016-04-28
164	1	13.9	13.8	4.75	3.81	0.66025	0.52959	1.18984	421	40	2016-04-29
164	1	15.8	15.1	5.03	3.79	0.79474	0.59882	1.39356	413	41	2016-04-30
164	1	15.6	15.9333	4.74	3.84	0.73944	0.59904	1.33848	419	42	2016-05-01
164	1	16.4	16.2	5	3.98	0.82	0.65272	1.47272	420	43	2016-05-02
164	1	16.6	16.5	5.23	4.07	0.86818	0.67562	1.5438	420	44	2016-05-03
164	1	16.5	15.6	5.35	4.1	0.88275	0.6765	1.55925	420	45	2016-05-04
164	1	13.7	15.2667	5.5	4.13	0.7535	0.56581	1.31931	420	46	2016-05-05
164	1	15.6	15.0667	5.52	3.99	0.86112	0.62244	1.48356	420	47	2016-05-06
164	1	15.9	15.7667	5.4	3.99	0.8586	0.63441	1.49301	422	48	2016-05-07
164	1	15.8	15.9667	5.3	4.03	0.8374	0.63674	1.47414	432	49	2016-05-08
164	1	16.2	16.1	5.37	4.09	0.86994	0.66258	1.53252	422	50	2016-05-09
164	1	16.3	16.3667	5.33	4.05	0.86879	0.66015	1.52894	418	51	2016-05-10
164	1	16.6	16.3333	5.43	4.05	0.90138	0.6723	1.57368	424	52	2016-05-11
164	1	16.1	16.0333	5.32	4.1	0.85652	0.6601	1.51662	426	53	2016-05-12
164	1	15.4	15.5	5.28	4.1	0.81312	0.6314	1.44452	428	54	2016-05-13
164	1	15	15.1667	5.21	4.09	0.7815	0.6135	1.395	426	55	2016-05-14
164	1	15.1	15.2	5.3	4.07	0.8003	0.61457	1.41487	410	56	2016-05-15
164	1	15.5	15.5	5.47	4.02	0.84785	0.6231	1.47095	421	57	2016-05-16
164	1	15.9	15.5333	5.43	4.01	0.86337	0.63759	1.50096	427	58	2016-05-17
164	1	15.2	15.3	5.34	4.01	0.81168	0.60952	1.4212	418	59	2016-05-18
164	1	14.8	14.9	5.29	4.02	0.78292	0.59496	1.37788	415	60	2016-05-19
164	1	14.7	14.7	5.36	3.97	0.78792	0.58359	1.37151	422	61	2016-05-20
164	1	14.6	14.6667	5.28	3.94	0.77088	0.57524	1.34612	429	62	2016-05-21
164	1	14.7	14.7333	5.35	3.9	0.78645	0.5733	1.35975	421	63	2016-05-22
164	1	14.9	14.5667	5.28	3.9	0.78672	0.5811	1.36782	418	64	2016-05-23
164	1	14.1	14.3667	5.33	3.9	0.75153	0.5499	1.30143	406	65	2016-05-24
164	1	14.1	13.8	5.21	3.92	0.73461	0.55272	1.28733	423	66	2016-05-25
164	1	13.2	14.2333	5.34	3.91	0.70488	0.51612	1.221	421	67	2016-05-26
164	1	15.4	14.5667	5.33	3.9	0.82082	0.6006	1.42142	419	68	2016-05-27
164	1	15.1	15.0333	5.02	3.93	0.75802	0.59343	1.35145	423	69	2016-05-28
164	1	14.6	14.6667	5.1	3.94	0.7446	0.57524	1.31984	425	70	2016-05-29
164	1	14.3	13.7333	5.16	3.96	0.73788	0.56628	1.30416	427	71	2016-05-30
164	1	12.3	13.2333	5.32	3.99	0.65436	0.49077	1.14513	420	72	2016-05-31
164	1	13.1	13.1333	5.16	3.92	0.67596	0.51352	1.18948	431	73	2016-06-01
164	1	14	13.8333	5.47	3.83	0.7658	0.5362	1.302	428	74	2016-06-02
164	1	14.4	13.9333	5.32	3.82	0.76608	0.55008	1.31616	422	75	2016-06-03
164	1	13.4	14.3333	5.69	3.84	0.76246	0.51456	1.27702	425	76	2016-06-04
164	1	15.2	14.4333	5.42	3.92	0.82384	0.59584	1.41968	424	77	2016-06-05
164	1	14.7	14.8333	5.2	3.95	0.7644	0.58065	1.34505	427	78	2016-06-06
164	1	14.6	14.5667	5.08	3.99	0.74168	0.58254	1.32422	436	79	2016-06-07
164	1	14.4	14.8333	5.16	4.01	0.74304	0.57744	1.32048	430	80	2016-06-08
164	1	15.5	14.9333	5.35	4	0.82925	0.62	1.44925	427	81	2016-06-09
164	1	14.9	15.0667	5.38	4	0.80162	0.596	1.39762	438	82	2016-06-10
164	1	14.8	14.8667	5.33	3.98	0.78884	0.58904	1.37788	430	83	2016-06-11
164	1	14.9	14.7667	5.32	4.02	0.79268	0.59898	1.39166	430	84	2016-06-12
164	1	14.6	14.6333	5.39	4.03	0.78694	0.58838	1.37532	445	85	2016-06-13
164	1	14.4	14.7667	5.65	4.07	0.8136	0.58608	1.39968	426	86	2016-06-14
164	1	15.3	14.8667	5.87	4.04	0.89811	0.61812	1.51623	433	87	2016-06-15
164	1	14.9	14.6667	5.51	4.02	0.82099	0.59898	1.41997	505	88	2016-06-16
164	1	13.8	14.0667	5.29	4.02	0.73002	0.55476	1.28478	429	89	2016-06-17
164	1	13.5	13.4667	4.89	4.04	0.66015	0.5454	1.20555	436	90	2016-06-18
164	1	13.1	13.6	5.11	4.05	0.66941	0.53055	1.19996	429	91	2016-06-19
164	1	14.2	14.0333	5.1	3.92	0.7242	0.55664	1.28084	432	92	2016-06-20
164	1	14.8	14.4667	5.37	3.85	0.79476	0.5698	1.36456	429	93	2016-06-21
164	1	14.4	14.7333	5.01	3.87	0.72144	0.55728	1.27872	530	94	2016-06-22
164	1	15	14.3333	4.81	3.94	0.7215	0.591	1.3125	430	95	2016-06-23
164	1	13.6	14	4.99	3.96	0.67864	0.53856	1.2172	428	96	2016-06-24
164	1	13.4	13.5333	5.27	3.96	0.70618	0.53064	1.23682	426	97	2016-06-25
164	1	13.6	14.0333	5.48	3.94	0.74528	0.53584	1.28112	426	98	2016-06-26
164	1	15.1	14.6	5.65	3.82	0.85315	0.57682	1.42997	427	99	2016-06-27
164	1	15.1	14.7	5.38	3.86	0.81238	0.58286	1.39524	434	100	2016-06-28
164	1	13.9	14.3	5.17	3.89	0.71863	0.54071	1.25934	425	101	2016-06-29
164	1	13.9	13.4667	5.02	3.92	0.69778	0.54488	1.24266	422	102	2016-06-30
164	1	12.6	13.1333	4.94	3.93	0.62244	0.49518	1.11762	430	103	2016-07-01
164	1	12.9	12.7667	4.79	3.87	0.61791	0.49923	1.11714	425	104	2016-07-02
164	1	12.8	12.8	4.95	3.9	0.6336	0.4992	1.1328	435	105	2016-07-03
164	1	12.7	12.8667	4.92	3.89	0.62484	0.49403	1.11887	443	106	2016-07-04
164	1	13.1	13.2	5.01	3.89	0.65631	0.50959	1.1659	414	107	2016-07-05
164	1	13.8	14.3667	5.28	3.85	0.72864	0.5313	1.25994	434	108	2016-07-06
164	1	16.2	15.3667	5.37	3.8	0.86994	0.6156	1.48554	424	109	2016-07-07
164	1	16.1	15.8667	5.33	3.84	0.85813	0.61824	1.47637	450	110	2016-07-08
164	1	15.3	15.5667	5.21	3.89	0.79713	0.59517	1.3923	439	111	2016-07-09
164	1	15.3	14.5667	5.33	3.95	0.81549	0.60435	1.41984	436	112	2016-07-10
164	1	13.1	13.8333	5.03	4	0.65893	0.524	1.18293	437	113	2016-07-11
164	1	13.1	13.5667	5.39	3.94	0.70609	0.51614	1.22223	423	114	2016-07-12
164	1	14.5	14.2333	5.03	3.93	0.72935	0.56985	1.2992	466	115	2016-07-13
164	1	15.1	15.0333	5.53	3.83	0.83503	0.57833	1.41336	434	116	2016-07-14
164	1	15.5	15.2333	5.41	3.84	0.83855	0.5952	1.43375	608	117	2016-07-15
164	1	15.1	15.4	5.65	3.85	0.85315	0.58135	1.4345	431	118	2016-07-16
164	1	15.6	15.7	5.61	3.9	0.87516	0.6084	1.48356	469	119	2016-07-17
164	1	16.4	16	5.58	3.9	0.91512	0.6396	1.55472	427	120	2016-07-18
164	1	16	16.0667	5.45	3.94	0.872	0.6304	1.5024	435	121	2016-07-19
164	1	15.8	16	5.45	3.95	0.8611	0.6241	1.4852	438	122	2016-07-20
164	1	16.2	15.6667	5.39	3.96	0.87318	0.64152	1.5147	431	123	2016-07-21
164	1	15	15.3	5.29	3.99	0.7935	0.5985	1.392	431	124	2016-07-22
164	1	14.7	14.9667	5.07	3.99	0.74529	0.58653	1.33182	434	125	2016-07-23
164	1	15.2	14.9	5.07	3.96	0.77064	0.60192	1.37256	431	126	2016-07-24
164	1	14.8	14.9	5.05	4	0.7474	0.592	1.3394	465	127	2016-07-25
164	1	14.7	14.9	5.4	3.95	0.7938	0.58065	1.37445	514	128	2016-07-26
164	1	15.2	15.4333	5.78	3.9	0.87856	0.5928	1.47136	435	129	2016-07-27
164	1	16.4	16.1333	5.7	3.91	0.9348	0.64124	1.57604	433	130	2016-07-28
164	1	16.8	16.5667	5.61	3.97	0.94248	0.66696	1.60944	433	131	2016-07-29
164	1	16.5	16.5667	5.5	4.01	0.9075	0.66165	1.56915	438	132	2016-07-30
164	1	16.4	16.0667	5.5	4.05	0.902	0.6642	1.5662	432	133	2016-07-31
[truncated: 3,358 more rows]

## Sheet: Mar-apr 2016
Animal Number	Parity	Day Production	Smoothed Production	Fat %	Protein %	Fat yield	Protein Yield	MS total	Weight	Day from Peak	Date
1	2	19.1	14.65	6.33	5.1	1.20903	0.9741	2.18313		-31	2016-04-14
1	2	10.2	14.8333	7.41	5.1	0.75582	0.5202	1.27602	403	-30	2016-04-15
1	2	15.2	14.4	7.95	4.99	1.2084	0.75848	1.96688	404	-29	2016-04-16
1	2	17.8	17.4333	7.2	4.96	1.2816	0.88288	2.16448	399	-28	2016-04-17
1	2	19.3	18.9667	5.57	4.9	1.07501	0.9457	2.02071	412	-27	2016-04-18
1	2	19.8	19.6333	5.35	4.84	1.0593	0.95832	2.01762	412	-26	2016-04-19
1	2	19.8	19.9	5.25	4.7	1.0395	0.9306	1.9701	410	-25	2016-04-20
1	2	20.1	19.6333	5.5	4.47	1.1055	0.89847	2.00397	408	-24	2016-04-21
1	2	19	19.7333	5.24	4.41	0.9956	0.8379	1.8335	412	-23	2016-04-22
1	2	20.1	19.7	5.42	4.24	1.08942	0.85224	1.94166	416	-22	2016-04-23
1	2	20	20.1333	5.25	4.23	1.05	0.846	1.896	418	-21	2016-04-24
1	2	20.3	20.0667	4.96	4.1	1.00688	0.8323	1.83918	417	-20	2016-04-25
1	2	19.9	20.2333	5.25	4.1	1.04475	0.8159	1.86065	404	-19	2016-04-26
1	2	20.5	20.5	5.4	4.02	1.107	0.8241	1.9311	404	-18	2016-04-27
1	2	21.1	21.4333	5.28	3.95	1.11408	0.83345	1.94753	409	-17	2016-04-28
1	2	22.7	22.5333	4.84	3.85	1.09868	0.87395	1.97263	408	-16	2016-04-29
1	2	23.8	23.3	4.63	3.87	1.10194	0.92106	2.023	407	-15	2016-04-30
1	2	23.4	23.9333	5	3.92	1.17	0.91728	2.08728	408	-14	2016-05-01
1	2	24.6	24.2333	4.92	3.89	1.21032	0.95694	2.16726	407	-13	2016-05-02
1	2	24.7	24.6333	5.01	3.97	1.23747	0.98059	2.21806	413	-12	2016-05-03
1	2	24.6	24.5667	5.05	3.91	1.2423	0.96186	2.20416	417	-11	2016-05-04
1	2	24.4	24.8667	4.98	3.87	1.21512	0.94428	2.1594	423	-10	2016-05-05
1	2	25.6	24.8333	5.11	3.87	1.30816	0.99072	2.29888	422	-9	2016-05-06
1	2	24.5	24.7	5.07	3.87	1.24215	0.94815	2.1903	419	-8	2016-05-07
1	2	24	24.4	5.2	3.94	1.248	0.9456	2.1936	425	-7	2016-05-08
1	2	24.7	25.2667	5.39	3.92	1.33133	0.96824	2.29957	426	-6	2016-05-09
1	2	27.1	26.0667	4.87	3.82	1.31977	1.03522	2.35499	425	-5	2016-05-10
1	2	26.4	25.7667	4.79	3.82	1.26456	1.00848	2.27304	464	-4	2016-05-11
1	2	23.8	24.8667	4.99	3.9	1.18762	0.9282	2.11582	409	-3	2016-05-12
1	2	24.4	25.0667	4.93	3.79	1.20292	0.92476	2.12768	416	-2	2016-05-13
1	2	27	26.2333	4.85	3.71	1.3095	1.0017	2.3112	425	-1	2016-05-14
1	2	27.3	26.9667	4.63	3.75	1.26399	1.02375	2.28774	418	0	2016-05-15
1	2	26.6	26.6333	4.83	3.78	1.28478	1.00548	2.29026	416	1	2016-05-16
1	2	26	26.3333	4.55	3.79	1.183	0.9854	2.1684	418	2	2016-05-17
1	2	26.4	26.3667	4.16	3.71	1.09824	0.97944	2.07768	418	3	2016-05-18
1	2	26.7	26.3333	4.98	3.71	1.32966	0.99057	2.32023	417	4	2016-05-19
1	2	25.9	26.3667	5	3.69	1.295	0.95571	2.25071	414	5	2016-05-20
1	2	26.5	26.5	4.88	3.71	1.2932	0.98315	2.27635	433	6	2016-05-21
1	2	27.1	26.9333	4.78	3.68	1.29538	0.99728	2.29266	423	7	2016-05-22
1	2	27.2	26.4333	4.72	3.78	1.28384	1.02816	2.312	424	8	2016-05-23
1	2	25	24.5667	4.62	3.77	1.155	0.9425	2.0975	470	9	2016-05-24
1	2	21.5	22.5667	5.09	3.8	1.09435	0.817	1.91135	414	10	2016-05-25
1	2	21.2	21.5333	4.82	3.7	1.02184	0.7844	1.80624	422	11	2016-05-26
1	2	21.9	22.1333	4.58	3.61	1.00302	0.79059	1.79361	417	12	2016-05-27
1	2	23.3	23.0333	4.63	3.54	1.07879	0.82482	1.90361	420	13	2016-05-28
1	2	23.9	24.2	4.52	3.6	1.08028	0.8604	1.94068	423	14	2016-05-29
1	2	25.4	24.7333	4.34	3.64	1.10236	0.92456	2.02692	424	15	2016-05-30
1	2	24.9	24.7667	4.46	3.72	1.11054	0.92628	2.03682	415	16	2016-05-31
1	2	24	24.5333	4.27	3.7	1.0248	0.888	1.9128	429	17	2016-06-01
1	2	24.7	24.2	4.85	3.69	1.19795	0.91143	2.10938	430	18	2016-06-02
1	2	23.9	24.4	4.84	3.69	1.15676	0.88191	2.03867	432	19	2016-06-03
1	2	24.6	24.1	4.59	3.64	1.12914	0.89544	2.02458	437	20	2016-06-04
1	2	23.8	23.8	4.68	3.73	1.11384	0.88774	2.00158	430	21	2016-06-05
1	2	23	23.4667	4.8	3.8	1.104	0.874	1.978	418	22	2016-06-06
1	2	23.6	23.3	4.79	3.78	1.13044	0.89208	2.02252	431	23	2016-06-07
1	2	23.3	23.5333	4.35	3.79	1.01355	0.88307	1.89662	431	24	2016-06-08
1	2	23.7	23.5667	4.72	3.84	1.11864	0.91008	2.02872	473	25	2016-06-09
1	2	23.7	23.9333	4.48	3.86	1.06176	0.91482	1.97658	431	26	2016-06-10
1	2	24.4	24.1667	4.63	3.9	1.12972	0.9516	2.08132	430	27	2016-06-11
1	2	24.4	24.2333	4.67	3.87	1.13948	0.94428	2.08376	433	28	2016-06-12
1	2	23.9	23.7333	4.72	3.87	1.12808	0.92493	2.05301	425	29	2016-06-13
1	2	22.9	23.6333	4.53	3.84	1.03737	0.87936	1.91673	426	30	2016-06-14
1	2	24.1	23.7667	4.69	3.86	1.13029	0.93026	2.06055	431	31	2016-06-15
1	2	24.3	24.1667	4.74	3.84	1.15182	0.93312	2.08494	439	32	2016-06-16
1	2	24.1	24.1	4.69	3.84	1.13029	0.92544	2.05573	433	33	2016-06-17
1	2	23.9	24.4	4.77	3.79	1.14003	0.90581	2.04584	431	34	2016-06-18
1	2	25.2	24.4	4.94	3.74	1.24488	0.94248	2.18736	427	35	2016-06-19
1	2	24.1	24.7333	4.57	3.74	1.10137	0.90134	2.00271	425	36	2016-06-20
1	2	24.9	25.1	4.43	3.73	1.10307	0.92877	2.03184	437	37	2016-06-21
1	2	26.3	25.1	4.77	3.73	1.25451	0.98099	2.2355	431	38	2016-06-22
1	2	24.1	23.9	4.61	3.78	1.11101	0.91098	2.02199	412	39	2016-06-23
1	2	21.3	23.8667	5.46	3.62	1.16298	0.77106	1.93404	405	40	2016-06-24
1	2	26.2	24.8667	4.81	3.3	1.26022	0.8646	2.12482	420	41	2016-06-25
1	2	27.1	26.3333	4.79	3.41	1.29809	0.92411	2.2222	424	42	2016-06-26
1	2	25.7	25.8667	4.31	3.58	1.10767	0.92006	2.02773	416	43	2016-06-27
1	2	24.8	24.5667	4.4	3.66	1.0912	0.90768	1.99888	420	44	2016-06-28
1	2	23.2	23.9	4.04	3.64	0.93728	0.84448	1.78176	419	45	2016-06-29
1	2	23.7	24.4667	3.9	3.63	0.9243	0.86031	1.78461	422	46	2016-06-30
1	2	26.5	25	4.37	3.6	1.15805	0.954	2.11205	430	47	2016-07-01
1	2	24.8	25	4.59	3.59	1.13832	0.89032	2.02864	429	48	2016-07-02
1	2	23.7	24.8333	4.35	3.67	1.03095	0.86979	1.90074	433	49	2016-07-03
1	2	26	25	4.47	3.59	1.1622	0.9334	2.0956	439	50	2016-07-04
1	2	25.3	25.6333	4.5	3.67	1.1385	0.92851	2.06701	417	51	2016-07-05
1	2	25.6	25.7333	4.63	3.62	1.18528	0.92672	2.112	429	52	2016-07-06
1	2	26.3	26.2667	4.24	3.63	1.11512	0.95469	2.06981	430	53	2016-07-07
1	2	26.9	26.6	4.24	3.67	1.14056	0.98723	2.12779	430	54	2016-07-08
1	2	26.6	26.5333	4.61	3.68	1.22626	0.97888	2.20514	434	55	2016-07-09
1	2	26.1	25.9333	4.55	3.74	1.18755	0.97614	2.16369	466	56	2016-07-10
1	2	25.1	25.7	4.67	3.71	1.17217	0.93121	2.10338	435	57	2016-07-11
1	2	25.9	25.8	4.72	3.61	1.22248	0.93499	2.15747	435	58	2016-07-12
1	2	26.4	26.3	4.62	3.65	1.21968	0.9636	2.18328	436	59	2016-07-13
1	2	26.6	26.5667	4.7	3.67	1.2502	0.97622	2.22642	439	60	2016-07-14
1	2	26.7	26.1667	4.65	3.71	1.24155	0.99057	2.23212	437	61	2016-07-15
1	2	25.2	25.5667	4.56	3.69	1.14912	0.92988	2.079	437	62	2016-07-16
1	2	24.8	24.9667	4.51	3.71	1.11848	0.92008	2.03856	428	63	2016-07-17
1	2	24.9	24.9667	4.58	3.69	1.14042	0.91881	2.05923	435	64	2016-07-18
1	2	25.2	25.5	4.67	3.63	1.17684	0.91476	2.0916	428	65	2016-07-19
1	2	26.4	25.2667	4.84	3.66	1.27776	0.96624	2.244	429	66	2016-07-20
1	2	24.2	25.1	4.81	3.68	1.16402	0.89056	2.05458	434	67	2016-07-21
1	2	24.7	25.1667	4.71	3.72	1.16337	0.91884	2.08221	433	68	2016-07-22
1	2	26.6	25.2333	5.03	3.71	1.33798	0.98686	2.32484	438	69	2016-07-23
1	2	24.4	25.0333	4.96	3.67	1.21024	0.89548	2.10572	431	70	2016-07-24
1	2	24.1	24.4667	4.65	3.66	1.12065	0.88206	2.00271	438	71	2016-07-25
1	2	24.9	24.7	4.64	3.62	1.15536	0.90138	2.05674	434	72	2016-07-26
1	2	25.1	25.1333	4.56	3.64	1.14456	0.91364	2.0582	432	73	2016-07-27
1	2	25.4	25.3667	4.63	3.66	1.17602	0.92964	2.10566	430	74	2016-07-28
1	2	25.6	25.9667	4.86	3.68	1.24416	0.94208	2.18624	433	75	2016-07-29
1	2	26.9	25.9667	4.48	3.69	1.20512	0.99261	2.19773	438	76	2016-07-30
1	2	25.4	25.1333	4.56	3.79	1.15824	0.96266	2.1209	443	77	2016-07-31
1	2	23.1	23.7333	4.78	3.83	1.10418	0.88473	1.98891	434	78	2016-08-01
1	2	22.7	22.5333	5.22	3.76	1.18494	0.85352	2.03846	435	79	2016-08-02
1	2	21.8	22.1	5.24	3.71	1.14232	0.80878	1.9511	437	80	2016-08-03
1	2	21.8	21.8667	5.5	3.7	1.199	0.8066	2.0056	437	81	2016-08-04
1	2	22	22.2667	5.55	3.69	1.221	0.8118	2.0328	448	82	2016-08-05
1	2	23	22.3667	4.94	3.67	1.1362	0.8441	1.9803	440	83	2016-08-06
1	2	22.1	22.4333	4.84	3.71	1.06964	0.81991	1.88955	451	84	2016-08-07
1	2	22.2	22.0667	5	3.73	1.11	0.82806	1.93806	442	85	2016-08-08
1	2	21.9	21.6	4.99	3.8	1.09281	0.8322	1.92501	442	86	2016-08-09
1	2	20.7	21.0333	4.56	3.82	0.94392	0.79074	1.73466	434	87	2016-08-10
1	2	20.5	21.2333	5.07	3.83	1.03935	0.78515	1.8245	448	88	2016-08-11
1	2	22.5	21.9333	5.01	3.78	1.12725	0.8505	1.97775	453	89	2016-08-12
1	2	22.8	22.5333	5.42	3.84	1.23576	0.87552	2.11128	442	90	2016-08-13
1	2	22.3	22.7	5.23	3.88	1.16629	0.86524	2.03153	448	91	2016-08-14
1	2	23	22.5	5.13	3.85	1.1799	0.8855	2.0654	435	92	2016-08-15
1	2	22.2	22.6	4.71	3.83	1.04562	0.85026	1.89588	451	93	2016-08-16
1	2	22.6	22.8	4.83	3.89	1.09158	0.87914	1.97072	456	94	2016-08-17
1	2	23.6	22.9667	5.02	3.79	1.18472	0.89444	2.07916	445	95	2016-08-18
1	2	22.7	22.9667	4.58	3.84	1.03966	0.87168	1.91134	442	96	2016-08-19
1	2	22.6	22.1667	4.39	3.89	0.99214	0.87914	1.87128	436	97	2016-08-20
1	2	21.2	21.9667	4.65	3.89	0.9858	0.82468	1.81048	463	98	2016-08-21
1	2	22.1	22.0667	4.73	3.74	1.04533	0.82654	1.87187	443	99	2016-08-22
1	2	22.9	22.4333	4.8	3.71	1.0992	0.84959	1.94879	443	100	2016-08-23
1	2	22.3	22.9667	4.52	3.76	1.00796	0.83848	1.84644	454	101	2016-08-24
1	2	23.7	23.2333	4.7	3.71	1.1139	0.87927	1.99317	444	102	2016-08-25
1	2	23.7	23.4667	4.93	3.78	1.16841	0.89586	2.06427	441	103	2016-08-26
1	2	23	23.1	4.63	3.79	1.0649	0.8717	1.9366	439	104	2016-08-27
1	2	22.6	22.8333	4.79	3.8	1.08254	0.8588	1.94134	439	105	2016-08-28
1	2	22.9	22.9	5	3.78	1.145	0.86562	2.01062	445	106	2016-08-29
1	2	23.2	23.3	4.9	3.73	1.1368	0.86536	2.00216	432	107	2016-08-30
1	2	23.8	23.1333	4.71	3.74	1.12098	0.89012	2.0111	461	108	2016-08-31
1	2	22.4	22.8333	4.85	3.81	1.0864	0.85344	1.93984	434	109	2016-09-01
1	2	22.3	22.6333	5.22	3.75	1.16406	0.83625	2.00031	436	110	2016-09-02
1	2	23.2	22.7333	5.24	3.67	1.21568	0.85144	2.06712	439	111	2016-09-03
1	2	22.7	22.5333	5.22	3.67	1.18494	0.83309	2.01803	436	112	2016-09-04
1	2	21.7	22.3333	5.26	3.66	1.14142	0.79422	1.93564	435	113	2016-09-05
1	2	22.6	22.1333	5.19	3.59	1.17294	0.81134	1.98428	434	114	2016-09-06
1	2	22.1	22.2333	5.15	3.59	1.13815	0.79339	1.93154	436	115	2016-09-07
1	2	22	22	4.9	3.58	1.078	0.7876	1.8656	464	116	2016-09-08
1	2	21.9	21.7667	4.94	3.56	1.08186	0.77964	1.8615	443	117	2016-09-09
1	2	21.4	22.0667	5.05	3.57	1.0807	0.76398	1.84468	435	118	2016-09-10
1	2	22.9	22.3333	4.95	3.56	1.13355	0.81524	1.94879	444	119	2016-09-11
1	2	22.7	22.8333	4.47	3.57	1.01469	0.81039	1.82508	435	120	2016-09-12
1	2	22.9	22.7667	4.73	3.66	1.08317	0.83814	1.92131	440	121	2016-09-13
1	2	22.7	21.8	4.79	3.71	1.08733	0.84217	1.9295	433	122	2016-09-14
1	2	19.8	21.6	4.31	3.64	0.85338	0.72072	1.5741	435	123	2016-09-15
1	2	22.3	21.4667	4.18	3.69	0.93214	0.82287	1.75501	434	124	2016-09-16
1	2	22.3	22.7667	4.75	3.62	1.05925	0.80726	1.86651	441	125	2016-09-17
1	2	23.7	22.9667	4.81	3.57	1.13997	0.84609	1.98606	440	126	2016-09-18
1	2	22.9	23.0333	4.49	3.63	1.02821	0.83127	1.85948	459	127	2016-09-19
1	2	22.5	22.6333	4.61	3.65	1.03725	0.82125	1.8585	444	128	2016-09-20
1	2	22.5	22.5667	4.22	3.56	0.9495	0.801	1.7505	438	129	2016-09-21
1	2	22.7	22.2	4.92	3.57	1.11684	0.81039	1.92723	441	130	2016-09-22
1	2	21.4	22.1	4.7	3.59	1.0058	0.76826	1.77406	440	131	2016-09-23
1	2	22.2	21.6	4.62	3.58	1.02564	0.79476	1.8204	443	132	2016-09-24
1	2	21.2	21.7	4.07	3.53	0.86284	0.74836	1.6112	436	133	2016-09-25
1	2	21.7	21.3333	3.53	3.61	0.76601	0.78337	1.54938	436	134	2016-09-26
1	2	21.1	21.1667	3.88	3.6	0.81868	0.7596	1.57828	438	135	2016-09-27
1	2	20.7	21.5	3.68	3.64	0.76176	0.75348	1.51524	437	136	2016-09-28
1	2	22.7	21.3333	4.5	3.55	1.0215	0.80585	1.82735	439	137	2016-09-29
1	2	20.6	21.6	4.49	3.58	0.92494	0.73748	1.66242	443	138	2016-09-30
1	2	21.5	20.8	4.66	3.55	1.0019	0.76325	1.76515	475	139	2016-10-01
1	2	20.3	21.2	4.36	3.6	0.88508	0.7308	1.61588	441	140	2016-10-02
1	2	21.8	21.1667	4.39	3.56	0.95702	0.77608	1.7331	444	141	2016-10-03
1	2	21.4	21.7	4.44	3.58	0.95016	0.76612	1.71628	448	142	2016-10-04
1	2	21.9	21.5	4.67	3.63	1.02273	0.79497	1.8177	490	143	2016-10-05
1	2	21.2	21.4667	4.66	3.67	0.98792	0.77804	1.76596	444	144	2016-10-06
1	2	21.3	21.4333	4.21	3.63	0.89673	0.77319	1.66992	444	145	2016-10-07
1	2	21.8	21.3667	4.79	3.59	1.04422	0.78262	1.82684	446	146	2016-10-08
1	2	21	21.4333	4.32	3.55	0.9072	0.7455	1.6527	436	147	2016-10-09
1	2	21.5	21.0333	4.26	3.61	0.9159	0.77615	1.69205	444	148	2016-10-10
1	2	20.6	20.6	4.58	3.64	0.94348	0.74984	1.69332	432	149	2016-10-11
1	2	19.7	20.8667	4.7	3.6	0.9259	0.7092	1.6351	446	150	2016-10-12
1	2	22.3	21.2333	4.94	3.55	1.10162	0.79165	1.89327	489	151	2016-10-13
1	2	21.7	21.6	4.87	3.6	1.05679	0.7812	1.83799	439	152	2016-10-14
1	2	20.8	21.2	4.57	3.61	0.95056	0.75088	1.70144	440	153	2016-10-15
1	2	21.1	20.9	4.63	3.56	0.97693	0.75116	1.72809	441	154	2016-10-16
1	2	20.8	20.8333	4.59	3.56	0.95472	0.74048	1.6952	441	155	2016-10-17
1	2	20.6	20.8667	5.09	3.54	1.04854	0.72924	1.77778	448	156	2016-10-18
1	2	21.2	21.1	4.92	3.48	1.04304	0.73776	1.7808	450	157	2016-10-19
1	2	21.5	21.2	4.66	3.48	1.0019	0.7482	1.7501	438	158	2016-10-20
1	2	20.9	21.2667	4.81	3.51	1.00529	0.73359	1.73888	446	159	2016-10-21
1	2	21.4	21.4	4.81	3.51	1.02934	0.75114	1.78048	446	160	2016-10-22
1	2	21.9	20.9	4.75	3.49	1.04025	0.76431	1.80456	441	161	2016-10-23
1	2	19.4	20.5333	4.47	3.5	0.86718	0.679	1.54618	454	162	2016-10-24
1	2	20.3	19.7667	4.6	3.47	0.9338	0.70441	1.63821	439	163	2016-10-25
1	2	19.6	20.2667	4.76	3.48	0.93296	0.68208	1.61504	445	164	2016-10-26
1	2	20.9	20.6667	4.77	3.45	0.99693	0.72105	1.71798	448	165	2016-10-27
1	2	21.5	21.5667	4.63	3.45	0.99545	0.74175	1.7372	449	166	2016-10-28
1	2	22.3	21.6667	4.83	3.49	1.07709	0.77827	1.85536	440	167	2016-10-29
1	2	21.2	21.6333	4.8	3.56	1.0176	0.75472	1.77232	451	168	2016-10-30
1	2	21.4	21.5667	4.64	3.6	0.99296	0.7704	1.76336	443	169	2016-10-31
1	2	22.1	21.6333	4.71	3.59	1.04091	0.79339	1.8343	442	170	2016-11-01
1	2	21.4	21.9	4.82	3.59	1.03148	0.76826	1.79974	447	171	2016-11-02
1	2	22.2	21.7667	4.73	3.58	1.05006	0.79476	1.84482	443	172	2016-11-03
1	2	21.7	22	4.75	3.63	1.03075	0.78771	1.81846	459	173	2016-11-04
1	2	22.1	21.7	4.97	3.67	1.09837	0.81107	1.90944	476	174	2016-11-05
1	2	21.3	21.3667	5.11	3.7	1.08843	0.7881	1.87653	444	175	2016-11-06
1	2	20.7	21.0333	5.31	3.66	1.09917	0.75762	1.85679	450	176	2016-11-07
1	2	21.1	21.1	5.25	3.61	1.10775	0.76171	1.86946	441	177	2016-11-08
1	2	21.5	21.3667	5.13	3.64	1.10295	0.7826	1.88555	481	178	2016-11-09
1	2	21.5	21.3667	5.18	3.73	1.1137	0.80195	1.91565	443	179	2016-11-10
1	2	21.1	21.6333	4.98	3.77	1.05078	0.79547	1.84625	473	180	2016-11-11
1	2	22.3	21.5667	4.75	3.74	1.05925	0.83402	1.89327	455	181	2016-11-12
1	2	21.3	21.5667	5.36	3.83	1.14168	0.81579	1.95747	444	182	2016-11-13
1	2	21.1	21.3	5.49	3.85	1.15839	0.81235	1.97074	454	183	2016-11-14
1	2	21.5	21.2333	5.3	3.88	1.1395	0.8342	1.9737	457	184	2016-11-15
1	2	21.1	20.3333	5.11	3.87	1.07821	0.81657	1.89478	438	185	2016-11-16
1	2	18.4	19.7667	4.96	3.85	0.91264	0.7084	1.62104	442	186	2016-11-17
1	2	19.8	19.8	4.45	3.58	0.8811	0.70884	1.58994	448	187	2016-11-18
1	2	21.2	20.8667	4.78	3.45	1.01336	0.7314	1.74476	451	188	2016-11-19
1	2	21.6	21.1333	4.73	3.55	1.02168	0.7668	1.78848	454	189	2016-11-20
1	2	20.6	21.1667	4.64	3.6	0.95584	0.7416	1.69744	453	190	2016-11-21
1	2	21.3	20.7	4.51	3.61	0.96063	0.76893	1.72956	493	191	2016-11-22
1	2	20.2	20.7333	4.76	3.61	0.96152	0.72922	1.69074	452	192	2016-11-23
1	2	20.7	20.3	4.68	3.68	0.96876	0.76176	1.73052	459	193	2016-11-24
1	2	20	20.2667	4.78	3.71	0.956	0.742	1.698	456	194	2016-11-25
1	2	20.1	20.0667	5.14	3.75	1.03314	0.75375	1.78689	464	195	2016-11-26
1	2	20.1	20.2333	4.82	3.73	0.96882	0.74973	1.71855	455	196	2016-11-27
1	2	20.5	19.9333	5.03	3.66	1.03115	0.7503	1.78145	457	197	2016-11-28
1	2	19.2	19.3333	4.92	3.68	0.94464	0.70656	1.6512	456	198	2016-11-29
1	2	18.3	18.8667	4.56	3.69	0.83448	0.67527	1.50975	456	199	2016-11-30
1	2	19.1	19.1333			0	0	0	461	200	2016-12-01
1	2	20	19.8667	5.09	3.76	1.018	0.752	1.77	460	201	2016-12-02
1	2	20.5	20.1333	5.06	3.74	1.0373	0.7667	1.804	469	202	2016-12-03
1	2	19.9	20.3333	5.34	3.86	1.06266	0.76814	1.8308	456	203	2016-12-04
1	2	20.6	19.9667	5.31	3.88	1.09386	0.79928	1.89314	457	204	2016-12-05
1	2	19.4	19.8667	5.38	3.95	1.04372	0.7663	1.81002	477	205	2016-12-06
1	2	19.6	19.4333	5.43	3.87	1.06428	0.75852	1.8228	454	206	2016-12-07
1	2	19.3	19.1667	5.28	3.81	1.01904	0.73533	1.75437	456	207	2016-12-08
1	2	18.6	18.8333	5.56	3.81	1.03416	0.70866	1.74282	455	208	2016-12-09
1	2	18.6	18	5.39	3.81	1.00254	0.70866	1.7112	452	209	2016-12-10
1	2	16.8	17.8667	5.35	3.83	0.8988	0.64344	1.54224	454	210	2016-12-11
1	2	18.2	18	5.43	3.75	0.98826	0.6825	1.67076	466	211	2016-12-12
1	2	19	18.9333	4.81	3.65	0.9139	0.6935	1.6074	458	212	2016-12-13
1	2	19.6	18.8	5.32	3.73	1.04272	0.73108	1.7738	456	213	2016-12-14
1	2	17.8	18.6	5.33	3.78	0.94874	0.67284	1.62158	452	214	2016-12-15
1	2	18.4	18.5667	5.4	3.79	0.9936	0.69736	1.69096	454	215	2016-12-16
1	2	19.5	18.9333	5.26	3.77	1.0257	0.73515	1.76085	484	216	2016-12-17
1	2	18.9	19	5.47	3.83	1.03383	0.72387	1.7577	451	217	2016-12-18
1	2	18.6	18.5	5.04	3.79	0.93744	0.70494	1.64238	457	218	2016-12-19
1	2	18	18.3333	5.04	3.76	0.9072	0.6768	1.584	454	219	2016-12-20
1	2	18.4	17.9667	5.52	3.74	1.01568	0.68816	1.70384	460	220	2016-12-21
1	2	17.5	18.2333	5.16	3.71	0.903	0.64925	1.55225	463	221	2016-12-22
1	2	18.8	18.4	4.86	3.63	0.91368	0.68244	1.59612	461	222	2016-12-23
1	2	18.9	18.9333	4.86	3.67	0.91854	0.69363	1.61217	465	223	2016-12-24
1	2	19.1	19.1667	5.02	3.72	0.95882	0.71052	1.66934	464	224	2016-12-25
1	2	19.5	19.8333	4.86	3.7	0.9477	0.7215	1.6692	460	225	2016-12-26
1	2	20.9	20.2	4.8	3.69	1.0032	0.77121	1.77441	461	226	2016-12-27
1	2	20.2	20.6	4.84	3.73	0.97768	0.75346	1.73114	460	227	2016-12-28
1	2	20.7	20.6667	4.81	3.72	0.99567	0.77004	1.76571	464	228	2016-12-29
1	2	21.1	20.7	4.85	3.7	1.02335	0.7807	1.80405	464	229	2016-12-30
1	2	20.3	20.4333	4.98	3.73	1.01094	0.75719	1.76813	464	230	2016-12-31
1	2	19.9	20.1	5.24	3.75	1.04276	0.74625	1.78901	491	231	2017-01-01
1	2	20.1	20.0333	5.23	3.75	1.05123	0.75375	1.80498	462	232	2017-01-02
1	2	20.1	20.4667	4.97	3.7	0.99897	0.7437	1.74267	462	233	2017-01-03
1	2	21.2	20.5667	5.03	3.68	1.06636	0.78016	1.84652	459	234	2017-01-04
1	2	20.4	20.1333	5.13	3.73	1.04652	0.76092	1.80744	458	235	2017-01-05
1	2	18.8	20.0667	4.84	3.74	0.90992	0.70312	1.61304	471	236	2017-01-06
1	2	21	20.3	5.22	3.78	1.0962	0.7938	1.89	465	237	2017-01-07
1	2	21.1	21	5.43	3.7	1.14573	0.7807	1.92643	464	238	2017-01-08
1	2	20.9	20.8	5.12	3.65	1.07008	0.76285	1.83293	467	239	2017-01-09
1	2	20.4	20.5333	4.79	3.7	0.97716	0.7548	1.73196	470	240	2017-01-10
1	2	20.3	20.7667	4.71	3.72	0.95613	0.75516	1.71129	470	241	2017-01-11
1	2	21.6	20.9333	4.96	3.77	1.07136	0.81432	1.88568	465	242	2017-01-12
1	2	20.9	21.3667	5.02	3.72	1.04918	0.77748	1.82666	470	243	2017-01-13
1	2	21.6	21.3333	5.17	3.7	1.11672	0.7992	1.91592	528	244	2017-01-14
1	2	21.5	21.7	5.01	3.77	1.07715	0.81055	1.8877	470	245	2017-01-15
1	2	22	21.3667	5.01	3.79	1.1022	0.8338	1.936	469	246	2017-01-16
1	2	20.6	21.1	5.08	3.81	1.04648	0.78486	1.83134	470	247	2017-01-17
1	2	20.7	20.5	4.95	3.78	1.02465	0.78246	1.80711	462	248	2017-01-18
1	2	20.2	20.5	5.42	3.85	1.09484	0.7777	1.87254	468	249	2017-01-19
1	2	20.6	20.8333	5.07	3.8	1.04442	0.7828	1.82722	468	250	2017-01-20
1	2	21.7	20.9333	4.78	3.63	1.03726	0.78771	1.82497	474	251	2017-01-21
1	2	20.5	21.5667	5.11	3.75	1.04755	0.76875	1.8163	469	252	2017-01-22
1	2	22.5	21.7	4.93	3.69	1.10925	0.83025	1.9395	474	253	2017-01-23
1	2	22.1	22.3667	5.38	3.76	1.18898	0.83096	2.01994	466	254	2017-01-24
1	2	22.5	22.4333	5.18	3.79	1.1655	0.85275	2.01825	470	255	2017-01-25
1	2	22.7	22.2	5.13	3.78	1.16451	0.85806	2.02257	466	256	2017-01-26
1	2	21.4	22.2	5.1	3.82	1.0914	0.81748	1.90888	465	257	2017-01-27
1	2	22.5	21.7667	4.89	3.74	1.10025	0.8415	1.94175	489	258	2017-01-28
1	2	21.4	21.6333	5.21	3.81	1.11494	0.81534	1.93028	472	259	2017-01-29
1	2	21	21.2667	5.12	3.78	1.0752	0.7938	1.869	469	260	2017-01-30
1	2	21.4	21.1667	5.49	3.79	1.17486	0.81106	1.98592	474	261	2017-01-31
1	2	21.1	21.4	5.25	3.8	1.10775	0.8018	1.90955	473	262	2017-02-01
1	2	21.7	21.2	5	3.75	1.085	0.81375	1.89875	503	263	2017-02-02
1	2	20.8	21.7333	4.87	3.78	1.01296	0.78624	1.7992	471	264	2017-02-03
1	2	22.7	21.9333	5.68	3.78	1.28936	0.85806	2.14742	469	265	2017-02-04
1	2	22.3	22.5333	5.49	3.76	1.22427	0.83848	2.06275	478	266	2017-02-05
1	2	22.6	22.5333	5.46	3.79	1.23396	0.85654	2.0905	476	267	2017-02-06
1	2	22.7	22.7667	5.08	3.8	1.15316	0.8626	2.01576	471	268	2017-02-07
1	2	23	22.6667	5.14	3.79	1.1822	0.8717	2.0539	527	269	2017-02-08
1	2	22.3	22.6	5.12	3.8	1.14176	0.8474	1.98916	474	270	2017-02-09
1	2	22.5	22.3	4.98	3.77	1.1205	0.84825	1.96875	533	271	2017-02-10
1	2	22.1	22.3333	4.87	3.77	1.07627	0.83317	1.90944	510	272	2017-02-11
1	2	22.4	22.1667	4.9	3.75	1.0976	0.84	1.9376	479	273	2017-02-12
1	2	22	22.0667	4.86	3.8	1.0692	0.836	1.9052	506	274	2017-02-13
1	2	21.8	22.0667	5.07	3.76	1.10526	0.81968	1.92494	468	275	2017-02-14
1	2	22.4	22.3667	5.03	3.75	1.12672	0.84	1.96672	485	276	2017-02-15
1	2	22.9	22.5333	5.11	3.74	1.17019	0.85646	2.02665	485	277	2017-02-16
1	2	22.3	22.4	5.17	3.77	1.15291	0.84071	1.99362	484	278	2017-02-17
1	2	22	21.9667	5.32	3.8	1.1704	0.836	2.0064	486	279	2017-02-18
1	2	21.6	21.5	5.44	3.82	1.17504	0.82512	2.00016	475	280	2017-02-19
1	2	20.9	21.4	5.43	3.84	1.13487	0.80256	1.93743	481	281	2017-02-20
1	2	21.7	20.9667	5.51	3.79	1.19567	0.82243	2.0181	480	282	2017-02-21
1	2	20.3	20.8333	5.78	3.85	1.17334	0.78155	1.95489	484	283	2017-02-22
1	2	20.5	20	5.7	3.84	1.1685	0.7872	1.9557	482	284	2017-02-23
1	2	19.2	20.6667	5.87	3.85	1.12704	0.7392	1.86624	488	285	2017-02-24
1	2	22.3	20.5	5.51	3.8	1.22873	0.8474	2.07613	484	286	2017-02-25
1	2	20	21.3667	5.58	3.82	1.116	0.764	1.88	493	287	2017-02-26
1	2	21.8	21.2667	5.92	3.98	1.29056	0.86764	2.1582	486	288	2017-02-27
1	2	22	21.5	6.03	4.21	1.3266	0.9262	2.2528	488	289	2017-02-28
1	2	20.7	20.8	5.97	4.3	1.23579	0.8901	2.12589	490	290	2017-03-01
1	2	19.7	19.8333	6.01	4.27	1.18397	0.84119	2.02516	482	291	2017-03-02
1	2	19.1	19.8667	6.17	4.24	1.17847	0.80984	1.98831	494	292	2017-03-03
1	2	20.8	20.3333	6.05	4.14	1.2584	0.86112	2.11952	497	293	2017-03-04
1	2	21.1	20.6	6.17	4.2	1.30187	0.8862	2.18807	494	294	2017-03-05
1	2	19.9	20.3667	5.73	4.28	1.14027	0.85172	1.99199	490	295	2017-03-06
1	2	20.1	19.9	5.89	4.31	1.18389	0.86631	2.0502	490	296	2017-03-07
1	2	19.7	20.2667	6.17	4.25	1.21549	0.83725	2.05274	495	297	2017-03-08
1	2	21	20.3333	5.98	4.22	1.2558	0.8862	2.142	491	298	2017-03-09
1	2	20.3	20.1667	6.05	4.21	1.22815	0.85463	2.08278	501	299	2017-03-10
1	2	19.2	19.2	6.16	4.33	1.18272	0.83136	2.01408	493	300	2017-03-11
1	2	18.1	18.6333	6.13	4.29	1.10953	0.77649	1.88602	495	301	2017-03-12
1	2	18.6	18.2333	6.14	4.26	1.14204	0.79236	1.9344	496	302	2017-03-13
1	2	18	18.2	6.21	4.27	1.1178	0.7686	1.8864	491	303	2017-03-14
1	2	18	18.1667	6.4	4.26	1.152	0.7668	1.9188	505	304	2017-03-15
1	2	18.5	18.2333	6.21	4.21	1.14885	0.77885	1.9277	514	305	2017-03-16
1	2	18.2	18.0667	6.28	4.2	1.14296	0.7644	1.90736	509	306	2017-03-17
1	2	17.5	17.3333	6.26	4.26	1.0955	0.7455	1.841	505	307	2017-03-18
1	2	16.3	16.9	6.36	4.3	1.03668	0.7009	1.73758	501	308	2017-03-19
1	2	16.9	16.9	6.59	4.25	1.11371	0.71825	1.83196	500	309	2017-03-20
1	2	17.5	17.1333	6.54	4.26	1.1445	0.7455	1.89	507	310	2017-03-21
1	2	17	17	6.4	4.27	1.088	0.7259	1.8139	502	311	2017-03-22
1	2	16.5	16.8333	6.44	4.32	1.0626	0.7128	1.7754	502	312	2017-03-23
1	2	17	16.3	6.39	4.33	1.0863	0.7361	1.8224	504	313	2017-03-24
1	2	15.4	16.0333	6.49	4.33	0.99946	0.66682	1.66628	499	314	2017-03-25
1	2	15.7	15.4	6.73	4.31	1.05661	0.67667	1.73328	508	315	2017-03-26
1	2	15.1	15.5	6.61	4.28	0.99811	0.64628	1.64439	501	316	2017-03-27
1	2	15.7	15.7333	6.69	4.29	1.05033	0.67353	1.72386	498	317	2017-03-28
1	2	16.4	16.2	6.69	4.25	1.09716	0.697	1.79416	506	318	2017-03-29
1	2	16.5	16.5333	6.66	4.23	1.0989	0.69795	1.79685	499	319	2017-03-30
1	2	16.7	16.7	6.68	4.26	1.11556	0.71142	1.82698	500	320	2017-03-31
1	2	16.9	17.0667	6.4	4.23	1.0816	0.71487	1.79647	513	321	2017-04-01
1	2	17.6	17.25	6.24	4.22	1.09824	0.74272	1.84096	489	322	2017-04-02
70	1	16.8	19.65	7.03	5.47	1.18104	0.91896	2.1	463	-90	2016-03-26
70	1	22.5	20.4333	6.8	5.4	1.53	1.215	2.745	477	-89	2016-03-27
70	1	22	22.4667	6.19	5.22	1.3618	1.1484	2.5102	450	-88	2016-03-28
70	1	22.9	22.9	4.9	4.91	1.1221	1.12439	2.24649	450	-87	2016-03-29
70	1	23.8	23.4	3.26	4.55	0.77588	1.0829	1.85878	450	-86	2016-03-30
70	1	23.5	23.4	2.35	4.25	0.55225	0.99875	1.551	450	-85	2016-03-31
70	1	22.9	22.8333	2.11	4.11	0.48319	0.94119	1.42438	455	-84	2016-04-01
70	1	22.1	21.5667	2.15	4.01	0.47515	0.88621	1.36136	455	-83	2016-04-02
70	1	19.7	19.3333	2.33	3.87	0.45901	0.76239	1.2214	436	-82	2016-04-03
70	1	16.2	17.2667	1.71	3.84	0.27702	0.62208	0.8991	428	-81	2016-04-04
70	1	15.9	16.6	2.41	3.76	0.38319	0.59784	0.98103	444	-80	2016-04-05
70	1	17.7	17.1333	2.57	3.78	0.45489	0.66906	1.12395	423	-79	2016-04-06
70	1	17.8	18.4	3.82	3.81	0.67996	0.67818	1.35814	427	-78	2016-04-07
70	1	19.7	18.5333	4.25	3.83	0.83725	0.75451	1.59176	423	-77	2016-04-08
70	1	18.1	18.1667	4.21	3.82	0.76201	0.69142	1.45343	425	-76	2016-04-09
70	1	16.7	16.3667	3.62	3.77	0.60454	0.62959	1.23413	423	-75	2016-04-10
70	1	14.3	15.4667	3.56	3.71	0.50908	0.53053	1.03961	420	-74	2016-04-11
70	1	15.4	15.4333	3.83	3.68	0.58982	0.56672	1.15654	433	-73	2016-04-12
70	1	16.6	16.3667	4.22	3.69	0.70052	0.61254	1.31306	420	-72	2016-04-13
70	1	17.1	16.3333	4.24	3.68	0.72504	0.62928	1.35432	419	-71	2016-04-14
70	1	15.3	16	4.2	3.71	0.6426	0.56763	1.21023	424	-70	2016-04-15
70	1	15.6	16.6	4.24	3.7	0.66144	0.5772	1.23864	406	-69	2016-04-16
70	1	18.9	18.7	4.7	3.77	0.8883	0.71253	1.60083	432	-68	2016-04-17
70	1	21.6	20.7333	4.89	3.81	1.05624	0.82296	1.8792	422	-67	2016-04-18
70	1	21.7	19.1333	4.97	3.87	1.07849	0.83979	1.91828	428	-66	2016-04-19
70	1	14.1	18.5667	5.35	3.97	0.75435	0.55977	1.31412	419	-65	2016-04-20
70	1	19.9	18.9667	5.42	3.78	1.07858	0.75222	1.8308	424	-64	2016-04-21
70	1	22.9	20.5	5.33	3.64	1.22057	0.83356	2.05413	433	-63	2016-04-22
70	1	18.7	21.1333	4.62	3.68	0.86394	0.68816	1.5521	430	-62	2016-04-23
70	1	21.8	21.1	4.37	3.81	0.95266	0.83058	1.78324	434	-61	2016-04-24
70	1	22.8	22.3	4.4	3.85	1.0032	0.8778	1.881	440	-60	2016-04-25
70	1	22.3	22.2333	4.58	3.84	1.02134	0.85632	1.87766	428	-59	2016-04-26
70	1	21.6	22.3	4.61	3.87	0.99576	0.83592	1.83168	437	-58	2016-04-27
70	1	23	22.6	4.59	3.9	1.0557	0.897	1.9527	431	-57	2016-04-28
70	1	23.2	23.2	4.53	3.89	1.05096	0.90248	1.95344	423	-56	2016-04-29
70	1	23.4	22.3667	4.6	3.84	1.0764	0.89856	1.97496	435	-55	2016-04-30
70	1	20.5	22.6667	4.32	3.86	0.8856	0.7913	1.6769	440	-54	2016-05-01
70	1	24.1	23.6333	4.8	3.9	1.1568	0.9399	2.0967	429	-53	2016-05-02
70	1	26.3	25.5333	5.01	3.88	1.31763	1.02044	2.33807	430	-52	2016-05-03
70	1	26.2	23.2333	5.17	3.86	1.35454	1.01132	2.36586	438	-51	2016-05-04
70	1	17.2	22.1667	4.89	3.87	0.84108	0.66564	1.50672	416	-50	2016-05-05
70	1	23.1	21.9333	4.75	3.84	1.09725	0.88704	1.98429	441	-49	2016-05-06
70	1	25.5	24.7	4.66	3.84	1.1883	0.9792	2.1675	447	-48	2016-05-07
70	1	25.5	24.9333	5.01	3.87	1.27755	0.98685	2.2644	435	-47	2016-05-08
70	1	23.8	24.6667	5.05	3.98	1.2019	0.94724	2.14914	436	-46	2016-05-09
70	1	24.7	24.1667	5.2	4.01	1.2844	0.99047	2.27487	436	-45	2016-05-10
70	1	24	24.8	4.91	3.97	1.1784	0.9528	2.1312	443	-44	2016-05-11
70	1	25.7	25.0667	4.82	3.98	1.23874	1.02286	2.2616	430	-43	2016-05-12
70	1	25.5	25.8	4.39	3.93	1.11945	1.00215	2.1216	431	-42	2016-05-13
70	1	26.2	25.7333	4.73	3.86	1.23926	1.01132	2.25058	439	-41	2016-05-14
70	1	25.5	25.8333	4.53	3.83	1.15515	0.97665	2.1318	444	-40	2016-05-15
70	1	25.8	25.2667	4.91	3.8	1.26678	0.9804	2.24718	430	-39	2016-05-16
70	1	24.5	25.0333	4.58	3.83	1.1221	0.93835	2.06045	452	-38	2016-05-17
70	1	24.8	24.8667	4.78	3.83	1.18544	0.94984	2.13528	449	-37	2016-05-18
70	1	25.3	25.1667	4.62	3.79	1.16886	0.95887	2.12773	436	-36	2016-05-19
70	1	25.4	25.6333	4.73	3.78	1.20142	0.96012	2.16154	431	-35	2016-05-20
70	1	26.2	25.8	4.74	3.8	1.24188	0.9956	2.23748	438	-34	2016-05-21
70	1	25.8	24.8667	4.73	3.81	1.22034	0.98298	2.20332	468	-33	2016-05-22
70	1	22.6	24.1	4.4	3.82	0.9944	0.86332	1.85772	438	-32	2016-05-23
70	1	23.9	23.7333	4.62	3.81	1.10418	0.91059	2.01477	434	-31	2016-05-24
70	1	24.7	23.9	4.28	3.78	1.05716	0.93366	1.99082	446	-30	2016-05-25
70	1	23.1	24.4667	4.57	3.77	1.05567	0.87087	1.92654	457	-29	2016-05-26
70	1	25.6	24.6	4.62	3.79	1.18272	0.97024	2.15296	435	-28	2016-05-27
70	1	25.1	25.4333	4.72	3.78	1.18472	0.94878	2.1335	499	-27	2016-05-28
70	1	25.6	25.3667	4.81	3.79	1.23136	0.97024	2.2016	443	-26	2016-05-29
70	1	25.4	26.1667	4.71	3.83	1.19634	0.97282	2.16916	455	-25	2016-05-30
70	1	27.5	25.5333	4.83	3.8	1.32825	1.045	2.37325	454	-24	2016-05-31
70	1	23.7	25.1667	4.74	3.83	1.12338	0.90771	2.03109	442	-23	2016-06-01
70	1	24.3	24.3667	4.5	3.81	1.0935	0.92583	2.01933	442	-22	2016-06-02
70	1	25.1	24.5333	4.49	3.83	1.12699	0.96133	2.08832	436	-21	2016-06-03
70	1	24.2	24.2667	4.49	3.78	1.08658	0.91476	2.00134	451	-20	2016-06-04
70	1	23.5	24.1	4.49	3.79	1.05515	0.89065	1.9458	453	-19	2016-06-05
70	1	24.6	24.7667	4.6	3.8	1.1316	0.9348	2.0664	445	-18	2016-06-06
70	1	26.2	25.3667	4.73	3.82	1.23926	1.00084	2.2401	456	-17	2016-06-07
70	1	25.3	25.9	4.85	3.85	1.22705	0.97405	2.2011	454	-16	2016-06-08
70	1	26.2	25.7333	4.63	3.86	1.21306	1.01132	2.22438	452	-15	2016-06-09
70	1	25.7	25.4333	4.62	3.85	1.18734	0.98945	2.17679	451	-14	2016-06-10
70	1	24.4	25.3	4.6	3.86	1.1224	0.94184	2.06424	442	-13	2016-06-11
70	1	25.8	25.3333	4.78	3.86	1.23324	0.99588	2.22912	443	-12	2016-06-12
70	1	25.8	25.3	4.6	3.85	1.1868	0.9933	2.1801	441	-11	2016-06-13
70	1	24.3	24.7	4.6	3.84	1.1178	0.93312	2.05092	470	-10	2016-06-14
70	1	24	24	4.65	3.85	1.116	0.924	2.04	458	-9	2016-06-15
70	1	23.7	23.6667	4.51	3.87	1.06887	0.91719	1.98606	468	-8	2016-06-16
70	1	23.3	23.2667	4.72	3.86	1.09976	0.89938	1.99914	449	-7	2016-06-17
70	1	22.8	22.9	4.47	3.87	1.01916	0.88236	1.90152	453	-6	2016-06-18
70	1	22.6	23.0333	4.56	3.84	1.03056	0.86784	1.8984	456	-5	2016-06-19
70	1	23.7	23.8333	4.63	3.83	1.09731	0.90771	2.00502	461	-4	2016-06-20
70	1	25.2	24.9667	4.91	3.8	1.23732	0.9576	2.19492	440	-3	2016-06-21
70	1	26	26.1667	4.81	3.73	1.2506	0.9698	2.2204	425	-2	2016-06-22
70	1	27.3	26.4	4.67	3.67	1.27491	1.00191	2.27682	434	-1	2016-06-23
70	1	25.9	26.5	4.8	3.67	1.2432	0.95053	2.19373	435	0	2016-06-24
70	1	26.3	25.9333	4.79	3.68	1.25977	0.96784	2.22761	453	1	2016-06-25
70	1	25.6	25.7667	4.87	3.73	1.24672	0.95488	2.2016	445	2	2016-06-26
70	1	25.4	25.3	4.92	3.75	1.24968	0.9525	2.20218	457	3	2016-06-27
70	1	24.9	24.6333	4.7	3.75	1.1703	0.93375	2.10405	459	4	2016-06-28
70	1	23.6	24.3	4.58	3.72	1.08088	0.87792	1.9588	450	5	2016-06-29
70	1	24.4	24.2	4.66	3.67	1.13704	0.89548	2.03252	431	6	2016-06-30
70	1	24.6	24.7	4.79	3.64	1.17834	0.89544	2.07378	445	7	2016-07-01
70	1	25.1	25.0667	4.88	3.69	1.22488	0.92619	2.15107	437	8	2016-07-02
70	1	25.5	25.0667	5.13	3.71	1.30815	0.94605	2.2542	435	9	2016-07-03
70	1	24.6	25.1	4.88	3.7	1.20048	0.9102	2.11068	442	10	2016-07-04
70	1	25.2	25.0667	4.71	3.71	1.18692	0.93492	2.12184	445	11	2016-07-05
70	1	25.4	25.5333	4.79	3.72	1.21666	0.94488	2.16154	455	12	2016-07-06
70	1	26	26.0333	4.9	3.72	1.274	0.9672	2.2412	432	13	2016-07-07
70	1	26.7	24.3333	4.77	3.7	1.27359	0.9879	2.26149	428	14	2016-07-08
70	1	20.3	22.4	4.72	3.71	0.95816	0.75313	1.71129	432	15	2016-07-09
70	1	20.2	21.5	4.77	3.67	0.96354	0.74134	1.70488	442	16	2016-07-10
70	1	24	22.9333	4.29	3.45	1.0296	0.828	1.8576	446	17	2016-07-11
70	1	24.6	23.5333	3.64	3.5	0.89544	0.861	1.75644	440	18	2016-07-12
70	1	22	24.7667	3.94	3.42	0.8668	0.7524	1.6192	437	19	2016-07-13
70	1	27.7	24.2	3.68	3.44	1.01936	0.95288	1.97224	449	20	2016-07-14
70	1	22.9	24.9	3.72	3.42	0.85188	0.78318	1.63506	437	21	2016-07-15
70	1	24.1	24.4333	3.78	3.4	0.91098	0.8194	1.73038	448	22	2016-07-16
70	1	26.3	25	3.77	3.36	0.99151	0.88368	1.87519	449	23	2016-07-17
70	1	24.6	25.1	3.83	3.44	0.94218	0.84624	1.78842	449	24	2016-07-18
70	1	24.4	24.4	3.81	3.44	0.92964	0.83936	1.769	447	25	2016-07-19
70	1	24.2	24.7333	3.81	3.4	0.92202	0.8228	1.74482	447	26	2016-07-20
70	1	25.6	25.0333	3.81	3.39	0.97536	0.86784	1.8432	451	27	2016-07-21
70	1	25.3	25.0333	3.61	3.38	0.91333	0.85514	1.76847	442	28	2016-07-22
70	1	24.2	25.1	3.6	3.43	0.8712	0.83006	1.70126	453	29	2016-07-23
70	1	25.8	25.4333	3.77	3.42	0.97266	0.88236	1.85502	452	30	2016-07-24
70	1	26.3	26.1667	3.79	3.42	0.99677	0.89946	1.89623	454	31	2016-07-25
70	1	26.4	25.9333	3.67	3.44	0.96888	0.90816	1.87704	455	32	2016-07-26
70	1	25.1	25.4333	3.7	3.46	0.9287	0.86846	1.79716	445	33	2016-07-27
70	1	24.8	25	3.74	3.46	0.92752	0.85808	1.7856	452	34	2016-07-28
70	1	25.1	25.3	3.61	3.45	0.90611	0.86595	1.77206	465	35	2016-07-29
70	1	26	25.5	3.67	3.5	0.9542	0.91	1.8642	459	36	2016-07-30
70	1	25.4	25.2333	3.83	3.53	0.97282	0.89662	1.86944	464	37	2016-07-31
70	1	24.3	24.5667	4.01	3.65	0.97443	0.88695	1.86138	460	38	2016-08-01
70	1	24	23.1667	4.12	3.66	0.9888	0.8784	1.8672	459	39	2016-08-02
70	1	21.2	20.1667	3.88	3.62	0.82256	0.76744	1.59	471	40	2016-08-03
70	1	15.3	15.7333	4.06	3.61	0.62118	0.55233	1.17351	438	41	2016-08-04
70	1	10.7	12.2	4.47	3.52	0.47829	0.37664	0.85493	419	42	2016-08-05
70	1	10.6	11.1667	4.77	3.38	0.50562	0.35828	0.8639	417	43	2016-08-06
70	1	12.2	11.8	4.69	3.3	0.57218	0.4026	0.97478	419	44	2016-08-07
70	1	12.6	12.6667	4.38	3.21	0.55188	0.40446	0.95634	421	45	2016-08-08
70	1	13.2	13.3333	4.17	3.22	0.55044	0.42504	0.97548	416	46	2016-08-09
70	1	14.2	14.1333	4.06	3.39	0.57652	0.48138	1.0579	429	47	2016-08-10
70	1	15	15.2	4.01	3.47	0.6015	0.5205	1.122	423	48	2016-08-11
70	1	16.4	15.9667	3.81	3.47	0.62484	0.56908	1.19392	505	49	2016-08-12
70	1	16.5	16.9667	3.83	3.54	0.63195	0.5841	1.21605	436	50	2016-08-13
70	1	18	18.1333	3.67	3.5	0.6606	0.63	1.2906	437	51	2016-08-14
70	1	19.9	18.7667	3.77	3.57	0.75023	0.71043	1.46066	437	52	2016-08-15
70	1	18.4	18.8333	3.81	3.55	0.70104	0.6532	1.35424	445	53	2016-08-16
70	1	18.2	18.6	4	3.61	0.728	0.65702	1.38502	443	54	2016-08-17
70	1	19.2	18.5	3.98	3.59	0.76416	0.68928	1.45344	433	55	2016-08-18
70	1	18.1	18.6667	4.06	3.59	0.73486	0.64979	1.38465	445	56	2016-08-19
70	1	18.7	18.3333	4.05	3.57	0.75735	0.66759	1.42494	448	57	2016-08-20
70	1	18.2	18.5667	3.93	3.57	0.71526	0.64974	1.365	445	58	2016-08-21
70	1	18.8	19.0667	3.91	3.56	0.73508	0.66928	1.40436	439	59	2016-08-22
70	1	20.2	19.8333	3.99	3.55	0.80598	0.7171	1.52308	447	60	2016-08-23
70	1	20.5	20.5333	3.85	3.53	0.78925	0.72365	1.5129	447	61	2016-08-24
70	1	20.9	20.7	3.84	3.55	0.80256	0.74195	1.54451	450	62	2016-08-25
70	1	20.7	20.6333	3.99	3.57	0.82593	0.73899	1.56492	432	63	2016-08-26
70	1	20.3	20.4667	3.97	3.52	0.80591	0.71456	1.52047	450	64	2016-08-27
70	1	20.4	20.2667	4.12	3.53	0.84048	0.72012	1.5606	446	65	2016-08-28
70	1	20.1	20.4333	4.1	3.53	0.8241	0.70953	1.53363	457	66	2016-08-29
70	1	20.8	20.3	4.12	3.51	0.85696	0.73008	1.58704	440	67	2016-08-30
70	1	20	20.6333	4.04	3.51	0.808	0.702	1.51	446	68	2016-08-31
70	1	21.1	20.6333	3.83	3.47	0.80813	0.73217	1.5403	451	69	2016-09-01
70	1	20.8	20.9	3.84	3.46	0.79872	0.71968	1.5184	453	70	2016-09-02
70	1	20.8	20.8	3.97	3.49	0.82576	0.72592	1.55168	458	71	2016-09-03
70	1	20.8	20.7	3.8	3.47	0.7904	0.72176	1.51216	456	72	2016-09-04
70	1	20.5	20.6667	3.94	3.49	0.8077	0.71545	1.52315	446	73	2016-09-05
70	1	20.7	20.6333	3.97	3.45	0.82179	0.71415	1.53594	456	74	2016-09-06
70	1	20.7	20.6333	3.7	3.37	0.7659	0.69759	1.46349	459	75	2016-09-07
70	1	20.5	20.4667	3.46	3.36	0.7093	0.6888	1.3981	453	76	2016-09-08
70	1	20.2	20.3333	3.46	3.38	0.69892	0.68276	1.38168	452	77	2016-09-09
70	1	20.3	20.6333	3.59	3.43	0.72877	0.69629	1.42506	458	78	2016-09-10
70	1	21.4	21.3333	3.72	3.41	0.79608	0.72974	1.52582	452	79	2016-09-11
70	1	22.3	21.8667	3.68	3.41	0.82064	0.76043	1.58107	454	80	2016-09-12
70	1	21.9	22	3.64	3.42	0.79716	0.74898	1.54614	458	81	2016-09-13
70	1	21.8	22.1333	3.55	3.4	0.7739	0.7412	1.5151	462	82	2016-09-14
70	1	22.7	21.9	3.74	3.4	0.84898	0.7718	1.62078	458	83	2016-09-15
70	1	21.2	21.6667	3.81	3.43	0.80772	0.72716	1.53488	443	84	2016-09-16
70	1	21.1	21.6333	3.87	3.39	0.81657	0.71529	1.53186	453	85	2016-09-17
70	1	22.6	21.6667	3.94	3.36	0.89044	0.75936	1.6498	460	86	2016-09-18
70	1	21.3	21.7333	3.87	3.35	0.82431	0.71355	1.53786	472	87	2016-09-19
70	1	21.3	21.5	3.8	3.37	0.8094	0.71781	1.52721	462	88	2016-09-20
70	1	21.9	21.5333	3.74	3.33	0.81906	0.72927	1.54833	461	89	2016-09-21
70	1	21.4	21.7333	3.77	3.31	0.80678	0.70834	1.51512	468	90	2016-09-22
70	1	21.9	21.8	3.91	3.3	0.85629	0.7227	1.57899	457	91	2016-09-23
70	1	22.1	21.9333	3.8	3.3	0.8398	0.7293	1.5691	453	92	2016-09-24
70	1	21.8	21.5333	3.7	3.31	0.8066	0.72158	1.52818	465	93	2016-09-25
70	1	20.7	21.6667	3.67	3.35	0.75969	0.69345	1.45314	461	94	2016-09-26
70	1	22.5	22	3.76	3.28	0.846	0.738	1.584	458	95	2016-09-27
70	1	22.8	22.6333	3.93	3.25	0.89604	0.741	1.63704	466	96	2016-09-28
70	1	22.6	22.3	3.91	3.3	0.88366	0.7458	1.62946	458	97	2016-09-29
70	1	21.5	21.8	3.68	3.34	0.7912	0.7181	1.5093	471	98	2016-09-30
70	1	21.3	21.3	3.71	3.37	0.79023	0.71781	1.50804	465	99	2016-10-01
70	1	21.1	21.0667	3.83	3.39	0.80813	0.71529	1.52342	471	100	2016-10-02
70	1	20.8	21.2	3.63	3.36	0.75504	0.69888	1.45392	467	101	2016-10-03
70	1	21.7	21.4	3.66	3.36	0.79422	0.72912	1.52334	464	102	2016-10-04
70	1	21.7	21.5667	3.75	3.35	0.81375	0.72695	1.5407	462	103	2016-10-05
70	1	21.3	21.2	3.78	3.34	0.80514	0.71142	1.51656	468	104	2016-10-06
70	1	20.6	21.1333	3.83	3.36	0.78898	0.69216	1.48114	456	105	2016-10-07
70	1	21.5	21.6	4.02	3.3	0.8643	0.7095	1.5738	455	106	2016-10-08
70	1	22.7	22.3333	4.01	3.28	0.91027	0.74456	1.65483	500	107	2016-10-09
70	1	22.8	22.4	3.9	3.34	0.8892	0.76152	1.65072	468	108	2016-10-10
70	1	21.7	21.6333	3.9	3.38	0.8463	0.73346	1.57976	454	109	2016-10-11
70	1	20.4	20.6	3.83	3.36	0.78132	0.68544	1.46676	450	110	2016-10-12
70	1	19.7	20.5667	3.84	3.34	0.75648	0.65798	1.41446	454	111	2016-10-13
70	1	21.6	20.7333	3.76	3.26	0.81216	0.70416	1.51632	474	112	2016-10-14
70	1	20.9	20.9333	3.82	3.29	0.79838	0.68761	1.48599	473	113	2016-10-15
70	1	20.3	20.5667	4.02	3.4	0.81606	0.6902	1.50626	472	114	2016-10-16
70	1	20.5	20.3333	3.99	3.4	0.81795	0.697	1.51495	482	115	2016-10-17
70	1	20.2	20.9	4.01	3.36	0.81002	0.67872	1.48874	469	116	2016-10-18
70	1	22	20.8	3.93	3.25	0.8646	0.715	1.5796	476	117	2016-10-19
70	1	20.2	20.9667	3.84	3.29	0.77568	0.66458	1.44026	482	118	2016-10-20
70	1	20.7	20.7667	3.82	3.34	0.79074	0.69138	1.48212	525	119	2016-10-21
70	1	21.4	20.5	3.96	3.35	0.84744	0.7169	1.56434	472	120	2016-10-22
70	1	19.4	19.8667	4.01	3.43	0.77794	0.66542	1.44336	456	121	2016-10-23
70	1	18.8	19.2	3.88	3.35	0.72944	0.6298	1.35924	462	122	2016-10-24
70	1	19.4	19.0667	3.91	3.23	0.75854	0.62662	1.38516	471	123	2016-10-25
70	1	19	19.3	3.9	3.21	0.741	0.6099	1.3509	471	124	2016-10-26
70	1	19.5	19.7333	3.83	3.27	0.74685	0.63765	1.3845	469	125	2016-10-27
70	1	20.7	20.7333	3.79	3.28	0.78453	0.67896	1.46349	467	126	2016-10-28
70	1	22	21.5667	3.86	3.32	0.8492	0.7304	1.5796	465	127	2016-10-29
70	1	22	21.6	4.05	3.38	0.891	0.7436	1.6346	451	128	2016-10-30
70	1	20.8	21.1	4.12	3.42	0.85696	0.71136	1.56832	467	129	2016-10-31
70	1	20.5	20.1333	4.02	3.42	0.8241	0.7011	1.5252	483	130	2016-11-01
70	1	19.1	20.3667	4.09	3.44	0.78119	0.65704	1.43823	550	131	2016-11-02
70	1	21.5	19.2667	4.12	3.44	0.8858	0.7396	1.6254	480	132	2016-11-03
70	1	17.2	17.6333	4.12	3.49	0.70864	0.60028	1.30892	445	133	2016-11-04
70	1	14.2	16.2	4.26	3.44	0.60492	0.48848	1.0934	453	134	2016-11-05
70	1	17.2	16.2333	4.13	3.39	0.71036	0.58308	1.29344	472	135	2016-11-06
70	1	17.3	18.1	4.15	3.35	0.71795	0.57955	1.2975	464	136	2016-11-07
70	1	19.8	19.3333	4.12	3.15	0.81576	0.6237	1.43946	470	137	2016-11-08
70	1	20.9	20.7	4.21	3.36	0.87989	0.70224	1.58213	469	138	2016-11-09
70	1	21.4	20.9667	4.14	3.42	0.88596	0.73188	1.61784	461	139	2016-11-10
70	1	20.6	21	4.13	3.52	0.85078	0.72512	1.5759	487	140	2016-11-11
70	1	21	20.8	4.24	3.65	0.8904	0.7665	1.6569	482	141	2016-11-12
70	1	20.8	20.5333	4.28	3.7	0.89024	0.7696	1.65984	478	142	2016-11-13
70	1	19.8	20.1333	4.27	3.71	0.84546	0.73458	1.58004	482	143	2016-11-14
70	1	19.8	19.2333	4.3	3.75	0.8514	0.7425	1.5939	475	144	2016-11-15
70	1	18.1	19.2	4.52	3.78	0.81812	0.68418	1.5023	487	145	2016-11-16
70	1	19.7	19.1333	4.55	3.72	0.89635	0.73284	1.62919	466	146	2016-11-17
70	1	19.6	19.6333	4.6	3.73	0.9016	0.73108	1.63268	474	147	2016-11-18
70	1	19.6	19.6	4.79	3.82	0.93884	0.74872	1.68756	477	148	2016-11-19
70	1	19.6	19.5333	4.9	3.8	0.9604	0.7448	1.7052	485	149	2016-11-20
70	1	19.4	19.1667	4.96	3.75	0.96224	0.7275	1.68974	482	150	2016-11-21
70	1	18.5	19.0333	4.93	3.77	0.91205	0.69745	1.6095	485	151	2016-11-22
70	1	19.2	19.0333	4.84	3.77	0.92928	0.72384	1.65312	468	152	2016-11-23
70	1	19.4	19.3667	4.68	3.76	0.90792	0.72944	1.63736	476	153	2016-11-24
70	1	19.5	19.3	4.71	3.8	0.91845	0.741	1.65945	475	154	2016-11-25
70	1	19	19.3	4.74	3.83	0.9006	0.7277	1.6283	480	155	2016-11-26
70	1	19.4	19.2667	4.82	3.79	0.93508	0.73526	1.67034	476	156	2016-11-27
70	1	19.4	19.3667	4.66	3.77	0.90404	0.73138	1.63542	482	157	2016-11-28
70	1	19.3	19.6	4.59	3.81	0.88587	0.73533	1.6212	474	158	2016-11-29
70	1	20.1	19.5	4.64	4	0.93264	0.804	1.73664	477	159	2016-11-30
70	1	19.1	19.8			0	0	0	493	160	2016-12-01
70	1	20.2	19.7667	5.19	4	1.04838	0.808	1.85638	489	161	2016-12-02
70	1	20	19.8	4.94	3.91	0.988	0.782	1.77	498	162	2016-12-03
70	1	19.2	20	5.21	3.91	1.00032	0.75072	1.75104	489	163	2016-12-04
70	1	20.8	19.3333	5.14	3.87	1.06912	0.80496	1.87408	478	164	2016-12-05
70	1	18	19.1	5.03	3.91	0.9054	0.7038	1.6092	480	165	2016-12-06
70	1	18.5	18.2667	5.07	3.92	0.93795	0.7252	1.66315	485	166	2016-12-07
70	1	18.3	18.5	5.34	3.88	0.97722	0.71004	1.68726	476	167	2016-12-08
70	1	18.7	18.7667	5.46	3.82	1.02102	0.71434	1.73536	462	168	2016-12-09
70	1	19.3	18.7	5.26	3.8	1.01518	0.7334	1.74858	484	169	2016-12-10
70	1	18.1	18.7	5.36	3.87	0.97016	0.70047	1.67063	487	170	2016-12-11
70	1	18.7	18.3	5.18	3.88	0.96866	0.72556	1.69422	484	171	2016-12-12
70	1	18.1	18.1667	5.06	3.83	0.91586	0.69323	1.60909	480	172	2016-12-13
70	1	17.7	17.9667	5.19	3.85	0.91863	0.68145	1.60008	475	173	2016-12-14
70	1	18.1	17.3333	4.96	3.79	0.89776	0.68599	1.58375	483	174	2016-12-15
70	1	16.2	17.3333	5.24	3.82	0.84888	0.61884	1.46772	485	175	2016-12-16
70	1	17.7	17.1667	5.07	3.74	0.89739	0.66198	1.55937	477	176	2016-12-17
70	1	17.6	17.7333	4.85	3.68	0.8536	0.64768	1.50128	476	177	2016-12-18
70	1	17.9	18.3	4.86	3.74	0.86994	0.66946	1.5394	480	178	2016-12-19
70	1	19.4	18.6333	4.99	3.75	0.96806	0.7275	1.69556	478	179	2016-12-20
70	1	18.6	18.8667	5.08	3.78	0.94488	0.70308	1.64796	471	180	2016-12-21
70	1	18.6	19	4.78	3.8	0.88908	0.7068	1.59588	485	181	2016-12-22
70	1	19.8	19	4.79	3.75	0.94842	0.7425	1.69092	485	182	2016-12-23
70	1	18.6	19.4333	4.93	3.83	0.91698	0.71238	1.62936	490	183	2016-12-24
70	1	19.9	19.1667	5	3.83	0.995	0.76217	1.75717	485	184	2016-12-25
70	1	19	19.4667	5.16	3.81	0.9804	0.7239	1.7043	481	185	2016-12-26
70	1	19.5	19.2667	5.12	3.85	0.9984	0.75075	1.74915	488	186	2016-12-27
70	1	19.3	19.1667	5.13	3.85	0.99009	0.74305	1.73314	479	187	2016-12-28
70	1	18.7	19.3333	5.09	3.74	0.95183	0.69938	1.65121	471	188	2016-12-29
70	1	20	19.6	4.88	3.68	0.976	0.736	1.712	503	189	2016-12-30
70	1	20.1	20.0667	4.92	3.75	0.98892	0.75375	1.74267	481	190	2016-12-31
70	1	20.1	20	4.91	3.76	0.98691	0.75576	1.74267	482	191	2017-01-01
70	1	19.8	19.8667	5.04	3.75	0.99792	0.7425	1.74042	482	192	2017-01-02
70	1	19.7	19.1667	4.95	3.73	0.97515	0.73481	1.70996	485	193	2017-01-03
70	1	18	18.8667	4.81	3.78	0.8658	0.6804	1.5462	484	194	2017-01-04
70	1	18.9	18.8667	4.88	3.75	0.92232	0.70875	1.63107	478	195	2017-01-05
70	1	19.7	19.1333	5.04	3.74	0.99288	0.73678	1.72966	479	196	2017-01-06
70	1	18.8	19.6667	5.05	3.73	0.9494	0.70124	1.65064	493	197	2017-01-07
70	1	20.5	20.1	5.06	3.76	1.0373	0.7708	1.8081	492	198	2017-01-08
70	1	21	20.6333	5.09	3.74	1.0689	0.7854	1.8543	492	199	2017-01-09
70	1	20.4	20.5667	5.18	3.85	1.05672	0.7854	1.84212	491	200	2017-01-10
70	1	20.3	20.2667	4.95	3.82	1.00485	0.77546	1.78031	495	201	2017-01-11
70	1	20.1	19.6	4.88	3.81	0.98088	0.76581	1.74669	492	202	2017-01-12
70	1	18.4	18.5	5.12	3.88	0.94208	0.71392	1.656	486	203	2017-01-13
70	1	17	17.8667	5.29	3.86	0.8993	0.6562	1.5555	493	204	2017-01-14
70	1	18.2	18.4667	5.17	3.71	0.94094	0.67522	1.61616	497	205	2017-01-15
70	1	20.2	19.9	4.85	3.57	0.9797	0.72114	1.70084	502	206	2017-01-16
70	1	21.3	20.7	4.92	3.67	1.04796	0.78171	1.82967	497	207	2017-01-17
70	1	20.6	20.1	4.81	3.76	0.99086	0.77456	1.76542	509	208	2017-01-18
70	1	18.4	19.4667	4.84	3.87	0.89056	0.71208	1.60264	482	209	2017-01-19
70	1	19.4	20.1	5.14	3.9	0.99716	0.7566	1.75376	491	210	2017-01-20
70	1	22.5	21.5667	5.1	3.7	1.1475	0.8325	1.98	496	211	2017-01-21
70	1	22.8	22.6	4.86	3.71	1.10808	0.84588	1.95396	492	212	2017-01-22
70	1	22.5	22.9333	4.98	3.86	1.1205	0.8685	1.989	491	213	2017-01-23
70	1	23.5	22.5333	4.82	3.82	1.1327	0.8977	2.0304	495	214	2017-01-24
70	1	21.6	21.5	4.81	3.78	1.03896	0.81648	1.85544	489	215	2017-01-25
70	1	19.4	20.8333	4.94	3.81	0.95836	0.73914	1.6975	485	216	2017-01-26
70	1	21.5	20.9	5.2	3.77	1.118	0.81055	1.92855	494	217	2017-01-27
70	1	21.8	21.7333	5.1	3.69	1.1118	0.80442	1.91622	494	218	2017-01-28
70	1	21.9	22.1	4.97	3.69	1.08843	0.80811	1.89654	490	219	2017-01-29
70	1	22.6	22.3333	4.81	3.69	1.08706	0.83394	1.921	497	220	2017-01-30
70	1	22.5	23	4.91	3.71	1.10475	0.83475	1.9395	498	221	2017-01-31
70	1	23.9	23.1	5.14	3.75	1.22846	0.89625	2.12471	492	222	2017-02-01
70	1	22.9	23.3	4.74	3.76	1.08546	0.86104	1.9465	502	223	2017-02-02
70	1	23.1	22.4	4.6	3.75	1.0626	0.86625	1.92885	487	224	2017-02-03
70	1	21.2	21.7333	4.72	3.74	1.00064	0.79288	1.79352	479	225	2017-02-04
70	1	20.9	21.3667	4.97	3.7	1.03873	0.7733	1.81203	484	226	2017-02-05
70	1	22	21.8	4.66	3.59	1.0252	0.7898	1.815	491	227	2017-02-06
70	1	22.5	22.2667	4.62	3.56	1.0395	0.801	1.8405	488	228	2017-02-07
70	1	22.3	22.7	4.69	3.58	1.04587	0.79834	1.84421	491	229	2017-02-08
70	1	23.3	23.0667	4.55	3.61	1.06015	0.84113	1.90128	496	230	2017-02-09
70	1	23.6	22.8333	4.47	3.64	1.05492	0.85904	1.91396	490	231	2017-02-10
70	1	21.6	22.4667	4.54	3.69	0.98064	0.79704	1.77768	498	232	2017-02-11
70	1	22.2	21.5667	4.59	3.78	1.01898	0.83916	1.85814	501	233	2017-02-12
70	1	20.9	21.4	4.41	3.74	0.92169	0.78166	1.70335	498	234	2017-02-13
70	1	21.1	21.0333	4.41	3.72	0.93051	0.78492	1.71543	507	235	2017-02-14
70	1	21.1	20.9	4.49	3.72	0.94739	0.78492	1.73231	502	236	2017-02-15
70	1	20.5	21.5	4.86	3.8	0.9963	0.779	1.7753	499	237	2017-02-16
70	1	22.9	22.0333	5.03	3.78	1.15187	0.86562	2.01749	504	238	2017-02-17
70	1	22.7	22.9333	4.91	3.74	1.11457	0.84898	1.96355	510	239	2017-02-18
70	1	23.2	23.1	4.68	3.77	1.08576	0.87464	1.9604	509	240	2017-02-19
70	1	23.4	23.4333	4.84	3.81	1.13256	0.89154	2.0241	504	241	2017-02-20
70	1	23.7	23.2667	4.88	3.83	1.15656	0.90771	2.06427	501	242	2017-02-21
70	1	22.7	23.2667	4.68	3.84	1.06236	0.87168	1.93404	496	243	2017-02-22
70	1	23.4	23.4667	4.85	3.83	1.1349	0.89622	2.03112	500	244	2017-02-23
70	1	24.3	23.5667	4.97	3.73	1.20771	0.90639	2.1141	499	245	2017-02-24
70	1	23	23.1333	4.99	3.76	1.1477	0.8648	2.0125	504	246	2017-02-25
70	1	22.1	22.8	4.99	3.79	1.10279	0.83759	1.94038	506	247	2017-02-26
70	1	23.3	22.7333	4.97	3.86	1.15801	0.89938	2.05739	505	248	2017-02-27
70	1	22.8	23.4	5.16	4.02	1.17648	0.91656	2.09304	580	249	2017-02-28
70	1	24.1	23.5333	5.16	4.18	1.24356	1.00738	2.25094	561	250	2017-03-01
70	1	23.7	23.6667	5.18	4.17	1.22766	0.98829	2.21595	500	251	2017-03-02
70	1	23.2	23.4333	5.23	4.21	1.21336	0.97672	2.19008	503	252	2017-03-03
70	1	23.4	23.2667	5.07	4.17	1.18638	0.97578	2.16216	507	253	2017-03-04
70	1	23.2	23.0667	5.06	4.16	1.17392	0.96512	2.13904	513	254	2017-03-05
70	1	22.6	23	5	4.16	1.13	0.94016	2.07016	508	255	2017-03-06
70	1	23.2	22.9667	4.96	4.14	1.15072	0.96048	2.1112	505	256	2017-03-07
70	1	23.1	23.3667	5.06	4.11	1.16886	0.94941	2.11827	501	257	2017-03-08
70	1	23.8	23.8333	5.05	4.1	1.2019	0.9758	2.1777	508	258	2017-03-09
70	1	24.6	23.9	5.01	4.15	1.23246	1.0209	2.25336	514	259	2017-03-10
70	1	23.3	23.8	5.11	4.19	1.19063	0.97627	2.1669	519	260	2017-03-11
70	1	23.5	23.4667	5.17	4.19	1.21495	0.98465	2.1996	515	261	2017-03-12
70	1	23.6	23.3333	5.25	4.18	1.239	0.98648	2.22548	515	262	2017-03-13
70	1	22.9	23.0667	5.33	4.2	1.22057	0.9618	2.18237	514	263	2017-03-14
70	1	22.7	22.3667	5.29	4.2	1.20083	0.9534	2.15423	524	264	2017-03-15
70	1	21.5	21.8	5.34	4.2	1.1481	0.903	2.0511	525	265	2017-03-16
70	1	21.2	21.6333	5.5	4.23	1.166	0.89676	2.06276	519	266	2017-03-17
70	1	22.2	22	5.47	4.19	1.21434	0.93018	2.14452	514	267	2017-03-18
70	1	22.6	22.5333	5.64	4.22	1.27464	0.95372	2.22836	521	268	2017-03-19
70	1	22.8	22.5333	5.46	4.22	1.24488	0.96216	2.20704	520	269	2017-03-20
70	1	22.2	22.2333	5.66	4.23	1.25652	0.93906	2.19558	509	270	2017-03-21
70	1	21.7	21.8667	5.66	4.24	1.22822	0.92008	2.1483	518	271	2017-03-22
70	1	21.7	21.9333	5.59	4.2	1.21303	0.9114	2.12443	513	272	2017-03-23
70	1	22.4	22	5.47	4.18	1.22528	0.93632	2.1616	515	273	2017-03-24
70	1	21.9	22	5.34	4.18	1.16946	0.91542	2.08488	512	274	2017-03-25
70	1	21.7	21.7	5.15	4.19	1.11755	0.90923	2.02678	524	275	2017-03-26
70	1	21.5	21.6	5.01	4.19	1.07715	0.90085	1.978	518	276	2017-03-27
70	1	21.6	21.8667	5.17	4.22	1.11672	0.91152	2.02824	527	277	2017-03-28
70	1	22.5	21.9667	5.49	4.22	1.23525	0.9495	2.18475	521	278	2017-03-29
70	1	21.8	22.1	5.55	4.24	1.2099	0.92432	2.13422	521	279	2017-03-30
70	1	22	22.0667	5.62	4.25	1.2364	0.935	2.1714	518	280	2017-03-31
70	1	22.4	22.3	5.5	4.2	1.232	0.9408	2.1728	514	281	2017-04-01
70	1	22.5	21.9	5.36	4.21	1.206	0.94725	2.15325	525	282	2017-04-02
70	1	20.8	21.6667	5.3	4.24	1.1024	0.88192	1.98432	518	283	2017-04-03
70	1	21.7	20.8667	5.25	4.25	1.13925	0.92225	2.0615	516	284	2017-04-04
70	1	20.1	20.6667	5.32	4.31	1.06932	0.86631	1.93563	516	285	2017-04-05
70	1	20.2	19.9	5.38	4.32	1.08676	0.87264	1.9594	515	286	2017-04-06
70	1	19.4	20.2333	5.46	4.35	1.05924	0.8439	1.90314	519	287	2017-04-07
70	1	21.1	20.4667	5.55	4.27	1.17105	0.90097	2.07202	521	288	2017-04-08
70	1	20.9	20.7	5.49	4.24	1.14741	0.88616	2.03357	520	289	2017-04-09
70	1	20.1	20.1333	5.45	4.24	1.09545	0.85224	1.94769	516	290	2017-04-10
70	1	19.4	20.1667	5.43	4.24	1.05342	0.82256	1.87598	504	291	2017-04-11
70	1	21	21	5.49	4.26	1.1529	0.8946	2.0475	524	292	2017-04-12
70	1	22.6	21.1	5.53	4.29	1.24978	0.96954	2.21932	516	293	2017-04-13
70	1	19.7	20.5333	5.42	4.31	1.06774	0.84907	1.91681	517	294	2017-04-14
70	1	19.3	19.7667	5.56	4.36	1.07308	0.84148	1.91456	518	295	2017-04-15
70	1	20.3	19.8333	5.52	4.34	1.12056	0.88102	2.00158	515	296	2017-04-16
70	1	19.9	20.1667	5.71	4.31	1.13629	0.85769	1.99398	522	297	2017-04-17
70	1	20.3	20.2333	5.63	4.31	1.14289	0.87493	2.01782	527	298	2017-04-18
70	1	20.5	20.3667	5.53	4.27	1.13365	0.87535	2.009	518	299	2017-04-19
70	1	20.3	20.2333	5.41	4.31	1.09823	0.87493	1.97316	536	300	2017-04-20
70	1	19.9	20.0333	5.39	4.34	1.07261	0.86366	1.93627	529	301	2017-04-21
70	1	19.9	19.9667	5.4	4.35	1.0746	0.86565	1.94025	507	302	2017-04-22
70	1	20.1	19.9333	5.48	4.33	1.10148	0.87033	1.97181	538	303	2017-04-23
70	1	19.8	20.0333	5.6	4.39	1.1088	0.86922	1.97802	528	304	2017-04-24
70	1	20.2	19.4667	5.75	4.39	1.1615	0.88678	2.04828	517	305	2017-04-25
70	1	18.4	18.6667	5.81	4.4	1.06904	0.8096	1.87864	517	306	2017-04-26
70	1	17.4	18.2333	5.83	4.42	1.01442	0.76908	1.7835	534	307	2017-04-27
70	1	18.9	18.3667	5.8	4.4	1.0962	0.8316	1.9278	560	308	2017-04-28
70	1	18.8	18.7333	5.85	4.4	1.0998	0.8272	1.927	508	309	2017-04-29
70	1	18.5	19.1667	5.81	4.35	1.07485	0.80475	1.8796	520	310	2017-04-30
70	1	20.2	19.3	5.78	4.36	1.16756	0.88072	2.04828	518	311	2017-05-01
70	1	19.2	18.9	5.67	4.36	1.08864	0.83712	1.92576	518	312	2017-05-02
70	1	17.3	18.3333	5.5	4.35	0.9515	0.75255	1.70405	530	313	2017-05-03
70	1	18.5	18.2333	5.51	4.41	1.01935	0.81585	1.8352	538	314	2017-05-04
70	1	18.9	18.4	5.69	4.43	1.07541	0.83727	1.91268	523	315	2017-05-05
70	1	17.8	18.8333	5.79	4.44	1.03062	0.79032	1.82094	526	316	2017-05-06
70	1	19.8	19.2667	5.76	4.42	1.14048	0.87516	2.01564	564	317	2017-05-07
70	1	20.2	19.8	5.61	4.41	1.13322	0.89082	2.02404	526	318	2017-05-08
70	1	19.4	19.7	5.63	4.39	1.09222	0.85166	1.94388	546	319	2017-05-09
70	1	19.5	19.7	5.61	4.39	1.09395	0.85605	1.95	524	320	2017-05-10
70	1	20.2	20.1	5.64	4.41	1.13928	0.89082	2.0301	537	321	2017-05-11
70	1	20.6	20.3667	5.77	4.42	1.18862	0.91052	2.09914	521	322	2017-05-12
70	1	20.3	20.4667	5.85	4.47	1.18755	0.90741	2.09496	533	323	2017-05-13
70	1	20.5	20.4	5.76	4.44	1.1808	0.9102	2.091	522	324	2017-05-14
70	1	20.4	20.1	5.75	4.44	1.173	0.90576	2.07876	522	325	2017-05-15
70	1	19.4	19.6667	5.77	4.49	1.11938	0.87106	1.99044	522	326	2017-05-16
70	1	19.2	19.3333	5.64	4.45	1.08288	0.8544	1.93728	522	327	2017-05-17
70	1	19.4	19.2667	5.55	4.42	1.0767	0.85748	1.93418	514	328	2017-05-18
70	1	19.2	18.8	5.6	4.41	1.0752	0.84672	1.92192	511	329	2017-05-19
70	1	17.8	18.5	5.54	4.4	0.98612	0.7832	1.76932	538	330	2017-05-20
70	1	18.5	18.9	5.72	4.45	1.0582	0.82325	1.88145	520	331	2017-05-21
70	1	20.4	19.7667	5.86	4.45	1.19544	0.9078	2.10324	513	332	2017-05-22
70	1	20.4	20.3333	6.07	4.44	1.23828	0.90576	2.14404	533	333	2017-05-23
70	1	20.2	19.8333	5.87	4.42	1.18574	0.89284	2.07858	540	334	2017-05-24
70	1	18.9	19.9667	5.67	4.48	1.07163	0.84672	1.91835	533	335	2017-05-25
70	1	20.8	20.5667	5.26	4.46	1.09408	0.92768	2.02176	528	336	2017-05-26
70	1	22	21.9333	5.67	4.65	1.2474	1.023	2.2704	539	337	2017-05-27
70	1	23	22.4			0	0	0	535	338	2017-05-28
70	1	22.2	21.4667			0	0	0	517	339	2017-05-29
70	1	19.2	20.3	5.43	4.66	1.04256	0.89472	1.93728	529	340	2017-05-30
70	1	19.5	19.3667	5.34	4.58	1.0413	0.8931	1.9344	553	341	2017-05-31
70	1	19.4	19.8	5.49	4.58	1.06506	0.88852	1.95358	526	342	2017-06-01
70	1	20.5	20.6	5.82	4.48	1.1931	0.9184	2.1115	534	343	2017-06-02
70	1	21.9	21.4667	5.88	4.46	1.28772	0.97674	2.26446	519	344	2017-06-03
70	1	22	21.7667	5.74	4.45	1.2628	0.979	2.2418	532	345	2017-06-04
70	1	21.4	21.5333	5.35	4.49	1.1449	0.96086	2.10576	548	346	2017-06-05
70	1	21.2	21.3333	5.37	4.5	1.13844	0.954	2.09244	534	347	2017-06-06
70	1	21.4	21.8333	5.45	4.5	1.1663	0.963	2.1293	538	348	2017-06-07
70	1	22.9	21.7	5.56	4.46	1.27324	1.02134	2.29458	537	349	2017-06-08
70	1	20.8	21.2333	5.53	4.49	1.15024	0.93392	2.08416	533	350	2017-06-09
70	1	20	20.8667	5.52	4.51	1.104	0.902	2.006	539	351	2017-06-10
70	1	21.8	20.9	5.45	4.48	1.1881	0.97664	2.16474	515	352	2017-06-11
70	1	20.9	21.8667	5.69	4.45	1.18921	0.93005	2.11926	537	353	2017-06-12
70	1	22.9	21.7	5.64	4.44	1.29156	1.01676	2.30832	536	354	2017-06-13
70	1	21.3	21.7	5.44	4.43	1.15872	0.94359	2.10231	538	355	2017-06-14
70	1	20.9	21.5667	5.52	4.45	1.15368	0.93005	2.08373	533	356	2017-06-15
70	1	22.5	22.0667	5.55	4.4	1.24875	0.99	2.23875	545	357	2017-06-16
70	1	22.8	22.2	5.47	4.42	1.24716	1.00776	2.25492	543	358	2017-06-17
70	1	21.3	21.7667	5.38	4.45	1.14594	0.94785	2.09379	538	359	2017-06-18
70	1	21.2	21.7333	5.48	4.49	1.16176	0.95188	2.11364	545	360	2017-06-19
70	1	22.7	22.0667	5.42	4.43	1.23034	1.00561	2.23595	544	361	2017-06-20
70	1	22.3	21.9	5.29	4.43	1.17967	0.98789	2.16756	535	362	2017-06-21
70	1	20.7	21.3333	5.32	4.45	1.10124	0.92115	2.02239	632	363	2017-06-22
70	1	21	21.1667	5.57	4.47	1.1697	0.9387	2.1084	554	364	2017-06-23
70	1	21.8	21.4333	5.6	4.44	1.2208	0.96792	2.18872	548	365	2017-06-24
70	1	21.5	21.4667	5.37	4.39	1.15455	0.94385	2.0984	539	366	2017-06-25
70	1	21.1	21.3333	5.25	4.39	1.10775	0.92629	2.03404	547	367	2017-06-26
70	1	21.4	21.6	5.36	4.43	1.14704	0.94802	2.09506	549	368	2017-06-27
70	1	22.3	21.9667	5.54	4.42	1.23542	0.98566	2.22108	540	369	2017-06-28
70	1	22.2	21.8667	5.45	4.42	1.2099	0.98124	2.19114	544	370	2017-06-29
70	1	21.1	19.1667	5.31	4.46	1.12041	0.94106	2.06147	547	371	2017-06-30
107	2	14.2	16.5	8.38	4.74	1.18996	0.67308	1.86304		-43	2016-04-15
107	2	14.2	14.9667	6.51	4.31	0.92442	0.61202	1.53644	473	-42	2016-04-16
107	2	16.5	16.0667	5.23	4.03	0.86295	0.66495	1.5279	471	-41	2016-04-17
107	2	17.5	17.2667	5	4.03	0.875	0.70525	1.58025	490	-40	2016-04-18
107	2	17.8	17.6	4.51	4.01	0.80278	0.71378	1.51656	483	-39	2016-04-19
107	2	17.5	17.7	3.96	3.94	0.693	0.6895	1.3825	486	-38	2016-04-20
107	2	17.8	17.5333	3.79	3.84	0.67462	0.68352	1.35814	481	-37	2016-04-21
107	2	17.3	17.4667	3.46	3.76	0.59858	0.65048	1.24906	475	-36	2016-04-22
107	2	17.3	17.8667	4.14	3.67	0.71622	0.63491	1.35113	490	-35	2016-04-23
107	2	19	18.6667	4.44	3.63	0.8436	0.6897	1.5333	490	-34	2016-04-24
107	2	19.7	19.5333	4.32	3.65	0.85104	0.71905	1.57009	483	-33	2016-04-25
107	2	19.9	19.9333	3.95	3.67	0.78605	0.73033	1.51638	488	-32	2016-04-26
107	2	20.2	20.0667	4.62	3.69	0.93324	0.74538	1.67862	487	-31	2016-04-27
107	2	20.1	20.2667	4.6	3.67	0.9246	0.73767	1.66227	490	-30	2016-04-28
107	2	20.5	20.4	4.08	3.55	0.8364	0.72775	1.56415	481	-29	2016-04-29
107	2	20.6	18.9333	3.86	3.57	0.79516	0.73542	1.53058	501	-28	2016-04-30
107	2	15.7	17.6	4.14	3.63	0.64998	0.56991	1.21989	499	-27	2016-05-01
107	2	16.5	16.7333	4.88	3.63	0.8052	0.59895	1.40415	500	-26	2016-05-02
107	2	18	18.7667	5.1	3.64	0.918	0.6552	1.5732	492	-25	2016-05-03
107	2	21.8	20.6	4.47	3.68	0.97446	0.80224	1.7767	495	-24	2016-05-04
107	2	22	21.7667	4.6	3.68	1.012	0.8096	1.8216	497	-23	2016-05-05
107	2	21.5	21.7	4.67	3.64	1.00405	0.7826	1.78665	496	-22	2016-05-06
107	2	21.6	21.4667	4.45	3.57	0.9612	0.77112	1.73232	498	-21	2016-05-07
107	2	21.3	21.9	4.29	3.54	0.91377	0.75402	1.66779	500	-20	2016-05-08
107	2	22.8	22.0667	3.97	3.52	0.90516	0.80256	1.70772	496	-19	2016-05-09
107	2	22.1	22.3333	3.87	3.49	0.85527	0.77129	1.62656	498	-18	2016-05-10
107	2	22.1	22.1	4.15	3.44	0.91715	0.76024	1.67739	493	-17	2016-05-11
107	2	22.1	22.1333	4.36	3.45	0.96356	0.76245	1.72601	487	-16	2016-05-12
107	2	22.2	22.8667	4.46	3.48	0.99012	0.77256	1.76268	486	-15	2016-05-13
107	2	24.3	23.3	4.36	3.49	1.05948	0.84807	1.90755	485	-14	2016-05-14
107	2	23.4	24.1667	4.43	3.54	1.03662	0.82836	1.86498	503	-13	2016-05-15
107	2	24.8	23.9667	4.55	3.47	1.1284	0.86056	1.98896	497	-12	2016-05-16
107	2	23.7	24.2667	4.26	3.5	1.00962	0.8295	1.83912	482	-11	2016-05-17
107	2	24.3	23.8667	4.42	3.47	1.07406	0.84321	1.91727	494	-10	2016-05-18
107	2	23.6	23.6333	4.25	3.51	1.003	0.82836	1.83136	532	-9	2016-05-19
107	2	23	23.3667	4.13	3.45	0.9499	0.7935	1.7434	497	-8	2016-05-20
107	2	23.5	23.5333	4.36	3.34	1.0246	0.7849	1.8095	482	-7	2016-05-21
107	2	24.1	24	3.87	3.36	0.93267	0.80976	1.74243	474	-6	2016-05-22
107	2	24.4	23.9333	4.02	3.46	0.98088	0.84424	1.82512	485	-5	2016-05-23
107	2	23.3	23.3667	4.4	3.45	1.0252	0.80385	1.82905	471	-4	2016-05-24
107	2	22.4	22.8333	4.2	3.37	0.9408	0.75488	1.69568	489	-3	2016-05-25
107	2	22.8	22.9333	4.49	3.39	1.02372	0.77292	1.79664	492	-2	2016-05-26
107	2	23.6	23.7667	4.21	3.41	0.99356	0.80476	1.79832	495	-1	2016-05-27
107	2	24.9	24.3667	4.21	3.5	1.04829	0.8715	1.91979	496	0	2016-05-28
107	2	24.6	24.1333	4.39	3.53	1.07994	0.86838	1.94832	489	1	2016-05-29
107	2	22.9	23.5333	4.26	3.59	0.97554	0.82211	1.79765	478	2	2016-05-30
107	2	23.1	22.9333	4.08	3.6	0.94248	0.8316	1.77408	501	3	2016-05-31
107	2	22.8	22.7	3.84	3.62	0.87552	0.82536	1.70088	496	4	2016-06-01
107	2	22.2	22.5	3.76	3.64	0.83472	0.80808	1.6428	491	5	2016-06-02
107	2	22.5	22.2667	3.59	3.61	0.80775	0.81225	1.62	491	6	2016-06-03
107	2	22.1	22.1	3.46	3.55	0.76466	0.78455	1.54921	502	7	2016-06-04
107	2	21.7	22.0667	3.52	3.55	0.76384	0.77035	1.53419	500	8	2016-06-05
107	2	22.4	22.1	3.84	3.54	0.86016	0.79296	1.65312	505	9	2016-06-06
107	2	22.2	22.2667	3.95	3.61	0.8769	0.80142	1.67832	508	10	2016-06-07
107	2	22.2	22.2667	4.33	3.6	0.96126	0.7992	1.76046	508	11	2016-06-08
107	2	22.4	22.5	4.25	3.55	0.952	0.7952	1.7472	496	12	2016-06-09
107	2	22.9	22.3	4.24	3.53	0.97096	0.80837	1.77933	504	13	2016-06-10
107	2	21.6	22.0667	3.81	3.64	0.82296	0.78624	1.6092	498	14	2016-06-11
107	2	21.7	22.0333	4.07	3.62	0.88319	0.78554	1.66873	501	15	2016-06-12
107	2	22.8	21.4	4.42	3.55	1.00776	0.8094	1.81716	498	16	2016-06-13
107	2	19.7	20.8333	4.67	3.51	0.91999	0.69147	1.61146	476	17	2016-06-14
107	2	20	19.9333	4.78	3.47	0.956	0.694	1.65	485	18	2016-06-15
107	2	20.1	20.3	4.58	3.43	0.92058	0.68943	1.61001	490	19	2016-06-16
107	2	20.8	20.5667	4.38	3.49	0.91104	0.72592	1.63696	488	20	2016-06-17
107	2	20.8	21.1667	4.42	3.48	0.91936	0.72384	1.6432	490	21	2016-06-18
107	2	21.9	21.2	4.34	3.45	0.95046	0.75555	1.70601	492	22	2016-06-19
107	2	20.9	21.0333	4.33	3.45	0.90497	0.72105	1.62602	483	23	2016-06-20
107	2	20.3	20.7333	4.2	3.47	0.8526	0.70441	1.55701	485	24	2016-06-21
107	2	21	20.7667	4.17	3.45	0.8757	0.7245	1.6002	478	25	2016-06-22
107	2	21	20.0333	4.2	3.44	0.882	0.7224	1.6044	473	26	2016-06-23
107	2	18.1	20.2	4.3	3.42	0.7783	0.61902	1.39732	490	27	2016-06-24
107	2	21.5	20.2667	4.12	3.37	0.8858	0.72455	1.61035	479	28	2016-06-25
107	2	21.2	21.4333	4.36	3.3	0.92432	0.6996	1.62392	473	29	2016-06-26
107	2	21.6	21.6	4.42	3.36	0.95472	0.72576	1.68048	484	30	2016-06-27
107	2	22	21.7	4.04	3.45	0.8888	0.759	1.6478	486	31	2016-06-28
107	2	21.5	21.9	4.05	3.46	0.87075	0.7439	1.61465	489	32	2016-06-29
107	2	22.2	22.0667	4.14	3.45	0.91908	0.7659	1.68498	509	33	2016-06-30
107	2	22.5	22.3333	4.05	3.42	0.91125	0.7695	1.68075	499	34	2016-07-01
107	2	22.3	22.0333	3.96	3.43	0.88308	0.76489	1.64797	486	35	2016-07-02
107	2	21.3	21.7333	4.13	3.47	0.87969	0.73911	1.6188	493	36	2016-07-03
107	2	21.6	20.8667	4.41	3.44	0.95256	0.74304	1.6956	491	37	2016-07-04
107	2	19.7	20.1333	4.41	3.43	0.86877	0.67571	1.54448	470	38	2016-07-05
107	2	19.1	19.6667	4.54	3.31	0.86714	0.63221	1.49935	479	39	2016-07-06
107	2	20.2	19.6333	4.86	3.13	0.98172	0.63226	1.61398	481	40	2016-07-07
107	2	19.6	19.8	4.61	3.21	0.90356	0.62916	1.53272	494	41	2016-07-08
107	2	19.6	19.8	4.32	3.24	0.84672	0.63504	1.48176	485	42	2016-07-09
107	2	20.2	19.8333	3.91	3.3	0.78982	0.6666	1.45642	488	43	2016-07-10
107	2	19.7	20.0667	3.99	3.34	0.78603	0.65798	1.44401	489	44	2016-07-11
107	2	20.3	20.1	4.12	3.3	0.83636	0.6699	1.50626	495	45	2016-07-12
107	2	20.3	20.3667	4.11	3.31	0.83433	0.67193	1.50626	496	46	2016-07-13
107	2	20.5	20.9	4.21	3.37	0.86305	0.69085	1.5539	495	47	2016-07-14
107	2	21.9	20.7333	4.2	3.43	0.9198	0.75117	1.67097	503	48	2016-07-15
107	2	19.8	20.6333	4.05	3.48	0.8019	0.68904	1.49094	494	49	2016-07-16
107	2	20.2	19.7333	4.13	3.48	0.83426	0.70296	1.53722	508	50	2016-07-17
107	2	19.2	19.7667	4.36	3.47	0.83712	0.66624	1.50336	493	51	2016-07-18
107	2	19.9	19.5	4.2	3.49	0.8358	0.69451	1.53031	495	52	2016-07-19
107	2	19.4	18.8333	4.3	3.42	0.8342	0.66348	1.49768	498	53	2016-07-20
107	2	17.2	18.0333	4.41	3.44	0.75852	0.59168	1.3502	484	54	2016-07-21
107	2	17.5	17.1667	4.23	3.34	0.74025	0.5845	1.32475	489	55	2016-07-22
107	2	16.8	17.0333	3.89	3.19	0.65352	0.53592	1.18944	492	56	2016-07-23
107	2	16.8	17.0667	4.32	3.27	0.72576	0.54936	1.27512	493	57	2016-07-24
107	2	17.6	17.9667	4.63	3.35	0.81488	0.5896	1.40448	500	58	2016-07-25
107	2	19.5	17.9333	4.51	3.36	0.87945	0.6552	1.53465	494	59	2016-07-26
107	2	16.7	17.9333	4.45	3.41	0.74315	0.56947	1.31262	465	60	2016-07-27
107	2	17.6	17.7	4.58	3.36	0.80608	0.59136	1.39744	485	61	2016-07-28
107	2	18.8	18.4667	4.74	3.28	0.89112	0.61664	1.50776	488	62	2016-07-29
107	2	19	18.8667	4.66	3.3	0.8854	0.627	1.5124	485	63	2016-07-30
107	2	18.8	18.8	4.59	3.37	0.86292	0.63356	1.49648	474	64	2016-07-31
107	2	18.6	18.8	4.38	3.45	0.81468	0.6417	1.45638	468	65	2016-08-01
107	2	19	18.5333	4.56	3.48	0.8664	0.6612	1.5276	485	66	2016-08-02
107	2	18	18.3667	5.12	3.48	0.9216	0.6264	1.548	480	67	2016-08-03
107	2	18.1	17.4	4.89	3.52	0.88509	0.63712	1.52221	495	68	2016-08-04
107	2	16.1	16	4.63	3.59	0.74543	0.57799	1.32342	478	69	2016-08-05
107	2	13.8	14.7333	4.37	3.61	0.60306	0.49818	1.10124	470	70	2016-08-06
107	2	14.3	14.5	4.74	3.44	0.67782	0.49192	1.16974	466	71	2016-08-07
107	2	15.4	14.6	4.89	3.24	0.75306	0.49896	1.25202	491	72	2016-08-08
107	2	14.1	14.6667	4.81	3.16	0.67821	0.44556	1.12377	489	73	2016-08-09
107	2	14.5	14.5667	4.4	3.25	0.638	0.47125	1.10925	485	74	2016-08-10
107	2	15.1	14.8	4.17	3.37	0.62967	0.50887	1.13854	503	75	2016-08-11
107	2	14.8	15.5667	4.4	3.51	0.6512	0.51948	1.17068	493	76	2016-08-12
107	2	16.8	16.4	4.83	3.62	0.81144	0.60816	1.4196	506	77	2016-08-13
107	2	17.6	17.2667	4.86	3.66	0.85536	0.64416	1.49952	493	78	2016-08-14
107	2	17.4	17.4333	5.13	3.65	0.89262	0.6351	1.52772	497	79	2016-08-15
107	2	17.3	16.8667	4.93	3.67	0.85289	0.63491	1.4878	505	80	2016-08-16
107	2	15.9	17	4.99	3.65	0.79341	0.58035	1.37376	501	81	2016-08-17
107	2	17.8	17.0667	4.67	3.57	0.83126	0.63546	1.46672	492	82	2016-08-18
107	2	17.5	17.3667	4.77	3.55	0.83475	0.62125	1.456	491	83	2016-08-19
107	2	16.8	16.9333	4.84	3.57	0.81312	0.59976	1.41288	491	84	2016-08-20
107	2	16.5	16.8667	4.97	3.59	0.82005	0.59235	1.4124	491	85	2016-08-21
107	2	17.3	16.9333	4.86	3.54	0.84078	0.61242	1.4532	488	86	2016-08-22
107	2	17	16.7667	4.79	3.51	0.8143	0.5967	1.411	501	87	2016-08-23
107	2	16	16.1333	4.8	3.54	0.768	0.5664	1.3344	478	88	2016-08-24
107	2	15.4	15.9333	4.83	3.55	0.74382	0.5467	1.29052	488	89	2016-08-25
107	2	16.4	16.0667	4.66	3.49	0.76424	0.57236	1.3366	535	90	2016-08-26
107	2	16.4	15.8667	4.74	3.48	0.77736	0.57072	1.34808	493	91	2016-08-27
107	2	14.8	14.6	4.68	3.5	0.69264	0.518	1.21064	483	92	2016-08-28
107	2	12.6	13.8333	4.94	3.47	0.62244	0.43722	1.05966	487	93	2016-08-29
107	2	14.1	13.9667	4.78	3.36	0.67398	0.47376	1.14774	480	94	2016-08-30
107	2	15.2	15.3	4.73	3.17	0.71896	0.48184	1.2008	479	95	2016-08-31
107	2	16.6	16.1	4.29	3.02	0.71214	0.50132	1.21346	480	96	2016-09-01
107	2	16.5	16.9667	4.07	2.92	0.67155	0.4818	1.15335	489	97	2016-09-02
107	2	17.8	16.8	4.11	3.03	0.73158	0.53934	1.27092	469	98	2016-09-03
107	2	16.1	17.0333	3.92	3.16	0.63112	0.50876	1.13988	491	99	2016-09-04
107	2	17.2	16.7	3.84	3.16	0.66048	0.54352	1.204	495	100	2016-09-05
107	2	16.8	16.7667	3.82	3.14	0.64176	0.52752	1.16928	498	101	2016-09-06
107	2	16.3	16.2333	3.82	3.12	0.62266	0.50856	1.13122	488	102	2016-09-07
107	2	15.6	15.3333	3.98	3.06	0.62088	0.47736	1.09824	486	103	2016-09-08
107	2	14.1	14.5333	4.02	3	0.56682	0.423	0.98982	490	104	2016-09-09
107	2	13.9	13.6667	4.11	2.98	0.57129	0.41422	0.98551	487	105	2016-09-10
107	2	13	14.2667	4.21	2.92	0.5473	0.3796	0.9269	494	106	2016-09-11
107	2	15.9	15.1667	4.01	2.86	0.63759	0.45474	1.09233	488	107	2016-09-12
107	2	16.6	16.2333	3.72	2.92	0.61752	0.48472	1.10224	504	108	2016-09-13
107	2	16.2	16.4667	3.84	3.07	0.62208	0.49734	1.11942	494	109	2016-09-14
107	2	16.6	16.7	4.06	3.09	0.67396	0.51294	1.1869	499	110	2016-09-15
107	2	17.3	16.4	3.98	3.07	0.68854	0.53111	1.21965	494	111	2016-09-16
107	2	15.3	16.4	4.09	3.13	0.62577	0.47889	1.10466	489	112	2016-09-17
107	2	16.6	16.2	4.1	3.06	0.6806	0.50796	1.18856	498	113	2016-09-18
107	2	16.7	15.7333	4	3.04	0.668	0.50768	1.17568	489	114	2016-09-19
107	2	13.9	15.6333	4.05	3.02	0.56295	0.41978	0.98273	486	115	2016-09-20
107	2	16.3	15.4	4.09	2.98	0.66667	0.48574	1.15241	490	116	2016-09-21
107	2	16	15.8333	4.01	2.91	0.6416	0.4656	1.1072	481	117	2016-09-22
107	2	15.2	15.6667	4.02	2.99	0.61104	0.45448	1.06552	490	118	2016-09-23
107	2	15.8	15.3333	3.96	2.98	0.62568	0.47084	1.09652	495	119	2016-09-24
107	2	15	15.2667	4.03	2.96	0.6045	0.444	1.0485	485	120	2016-09-25
107	2	15	15.2333	4.18	3.02	0.627	0.453	1.08	493	121	2016-09-26
107	2	15.7	15.6667	4.11	3.04	0.64527	0.47728	1.12255	499	122	2016-09-27
107	2	16.3	16.2	4.08	3.03	0.66504	0.49389	1.15893	488	123	2016-09-28
107	2	16.6	16.4667	4.06	3.09	0.67396	0.51294	1.1869	500	124	2016-09-29
107	2	16.5	16.4	4.3	3.14	0.7095	0.5181	1.2276	483	125	2016-09-30
107	2	16.1	15.6667	4.13	3.1	0.66493	0.4991	1.16403	496	126	2016-10-01
107	2	14.4	14.9	4.05	3.06	0.5832	0.44064	1.02384	489	127	2016-10-02
107	2	14.2	14.5	4.17	3.04	0.59214	0.43168	1.02382	483	128	2016-10-03
107	2	14.9	15.0333	4.38	3.03	0.65262	0.45147	1.10409	488	129	2016-10-04
107	2	16	15.6333	4.42	3.03	0.7072	0.4848	1.192	496	130	2016-10-05
107	2	16	15.7667	4.22	3.03	0.6752	0.4848	1.16	497	131	2016-10-06
107	2	15.3	15.8	4.16	3.07	0.63648	0.46971	1.10619	494	132	2016-10-07
107	2	16.1	15.8667	4.21	3.05	0.67781	0.49105	1.16886	492	133	2016-10-08
107	2	16.2	16.4333	4.37	3.03	0.70794	0.49086	1.1988	496	134	2016-10-09
107	2	17	16.3	4.26	3.05	0.7242	0.5185	1.2427	489	135	2016-10-10
107	2	15.7	15.8667	4.22	3.09	0.66254	0.48513	1.14767	485	136	2016-10-11
107	2	14.9	14.6333	4.28	3.09	0.63772	0.46041	1.09813	484	137	2016-10-12
107	2	13.3	14.4	4.15	3.06	0.55195	0.40698	0.95893	502	138	2016-10-13
107	2	15	14.3333	4	3	0.6	0.45	1.05	501	139	2016-10-14
107	2	14.7	14.8667	3.94	2.97	0.57918	0.43659	1.01577	503	140	2016-10-15
107	2	14.9	14.8667	4.08	2.98	0.60792	0.44402	1.05194	492	141	2016-10-16
107	2	15	15.1	4.04	2.99	0.606	0.4485	1.0545	509	142	2016-10-17
107	2	15.4	15.3667	4.03	2.99	0.62062	0.46046	1.08108	492	143	2016-10-18
107	2	15.7	15.6	3.9	2.96	0.6123	0.46472	1.07702	492	144	2016-10-19
107	2	15.7	15.7	4.15	2.93	0.65155	0.46001	1.11156	492	145	2016-10-20
107	2	15.7	15.8667	4.27	2.94	0.67039	0.46158	1.13197	505	146	2016-10-21
107	2	16.2	16.2	4.08	2.95	0.66096	0.4779	1.13886	503	147	2016-10-22
107	2	16.7	16.3667	3.92	3.01	0.65464	0.50267	1.15731	501	148	2016-10-23
107	2	16.2	16.3333	4.05	3.07	0.6561	0.49734	1.15344	504	149	2016-10-24
107	2	16.1	15.8667	4.06	3.06	0.65366	0.49266	1.14632	506	150	2016-10-25
107	2	15.3	16	4.07	3.06	0.62271	0.46818	1.09089	498	151	2016-10-26
107	2	16.6	16.2333	3.98	3.01	0.66068	0.49966	1.16034	493	152	2016-10-27
107	2	16.8	16.8	4.08	2.97	0.68544	0.49896	1.1844	496	153	2016-10-28
107	2	17	16.3667	3.93	2.99	0.6681	0.5083	1.1764	493	154	2016-10-29
107	2	15.3	15.9	3.75	3	0.57375	0.459	1.03275	495	155	2016-10-30
107	2	15.4	15.8667	3.62	2.93	0.55748	0.45122	1.0087	489	156	2016-10-31
107	2	16.9	16.1333	3.82	2.94	0.64558	0.49686	1.14244	498	157	2016-11-01
107	2	16.1	16.5	4.24	2.98	0.68264	0.47978	1.16242	480	158	2016-11-02
107	2	16.5	16.2	4.16	3.04	0.6864	0.5016	1.188	493	159	2016-11-03
107	2	16	16.4	4.23	3.07	0.6768	0.4912	1.168	505	160	2016-11-04
107	2	16.7	15.8	3.97	3.11	0.66299	0.51937	1.18236	501	161	2016-11-05
107	2	14.7	15.9333	4.27	3.15	0.62769	0.46305	1.09074	505	162	2016-11-06
107	2	16.4	15.6	4.2	3.17	0.6888	0.51988	1.20868	507	163	2016-11-07
107	2	15.7	15.7	4.29	3.2	0.67353	0.5024	1.17593	508	164	2016-11-08
107	2	15	15.2333	4.12	3.22	0.618	0.483	1.101	508	165	2016-11-09
107	2	15	14.8667	4.24	3.2	0.636	0.48	1.116	492	166	2016-11-10
107	2	14.6	14.6	4.12	3.23	0.60152	0.47158	1.0731	511	167	2016-11-11
107	2	14.2	14.6333	4.55	3.18	0.6461	0.45156	1.09766	502	168	2016-11-12
107	2	15.1	14.8333	4.04	3.21	0.61004	0.48471	1.09475	519	169	2016-11-13
107	2	15.2	15	4.05	3.25	0.6156	0.494	1.1096	510	170	2016-11-14
107	2	14.7	14.5667	4.4	3.28	0.6468	0.48216	1.12896	508	171	2016-11-15
107	2	13.8	13.9	4.48	3.4	0.61824	0.4692	1.08744	512	172	2016-11-16
107	2	13.2	13.1	4.35	3.41	0.5742	0.45012	1.02432	510	173	2016-11-17
107	2	12.3	13.5	3.95	3.38	0.48585	0.41574	0.90159	498	174	2016-11-18
107	2	15	14.0667	4.65	3.26	0.6975	0.489	1.1865	508	175	2016-11-19
107	2	14.9	14.6333	4.76	3.28	0.70924	0.48872	1.19796	511	176	2016-11-20
107	2	14	14.5667	4.74	3.32	0.6636	0.4648	1.1284	515	177	2016-11-21
107	2	14.8	14.5	4.85	3.4	0.7178	0.5032	1.221	510	178	2016-11-22
107	2	14.7	14	4.79	3.42	0.70413	0.50274	1.20687	523	179	2016-11-23
107	2	12.5	13.7	4.59	3.45	0.57375	0.43125	1.005	503	180	2016-11-24
107	2	13.9	13.8667	4.64	3.45	0.64496	0.47955	1.12451	497	181	2016-11-25
107	2	15.2	14.9	4.62	3.4	0.70224	0.5168	1.21904	515	182	2016-11-26
107	2	15.6	15.0333	4.46	3.37	0.69576	0.52572	1.22148	509	183	2016-11-27
107	2	14.3	14.9333	4.37	3.36	0.62491	0.48048	1.10539	521	184	2016-11-28
107	2	14.9	14.7	4.45	3.34	0.66305	0.49766	1.16071	504	185	2016-11-29
107	2	14.9	14.2333	4.55	3.35	0.67795	0.49915	1.1771	510	186	2016-11-30
107	2	12.9	13.9	3.74	3.5	0.48246	0.4515	0.93396	511	187	2016-12-01
107	2	13.9	13.7	4.3	3.54	0.5977	0.49206	1.08976	515	188	2016-12-02
107	2	14.3	14.2	4.98	3.49	0.71214	0.49907	1.21121	501	189	2016-12-03
107	2	14.4	14.5333	4.78	3.47	0.68832	0.49968	1.188	498	190	2016-12-04
107	2	14.9	14.5	4.88	3.54	0.72712	0.52746	1.25458	515	191	2016-12-05
107	2	14.2	13.8667	4.79	3.62	0.68018	0.51404	1.19422	509	192	2016-12-06
107	2	12.5	13.4	4.98	3.67	0.6225	0.45875	1.08125	517	193	2016-12-07
107	2	13.5	13.1333	4.91	3.65	0.66285	0.49275	1.1556	518	194	2016-12-08
107	2	13.4	13.5	4.98	3.55	0.66732	0.4757	1.14302	515	195	2016-12-09
107	2	13.6	13.5333	4.77	3.52	0.64872	0.47872	1.12744	511	196	2016-12-10
107	2	13.6	13.4667	4.92	3.52	0.66912	0.47872	1.14784	511	197	2016-12-11
107	2	13.2	13.3667	5.2	3.55	0.6864	0.4686	1.155	531	198	2016-12-12
107	2	13.3	13.5667	5.36	3.57	0.71288	0.47481	1.18769	517	199	2016-12-13
107	2	14.2	13.8333	5.31	3.54	0.75402	0.50268	1.2567	520	200	2016-12-14
107	2	14	14.2667	4.99	3.51	0.6986	0.4914	1.19	517	201	2016-12-15
107	2	14.6	14	4.97	3.5	0.72562	0.511	1.23662	523	202	2016-12-16
107	2	13.4	14	5.31	3.53	0.71154	0.47302	1.18456	521	203	2016-12-17
107	2	14	13.9	5.35	3.55	0.749	0.497	1.246	521	204	2016-12-18
107	2	14.3	14.2333	4.99	3.51	0.71357	0.50193	1.2155	505	205	2016-12-19
107	2	14.4	14.1	4.89	3.46	0.70416	0.49824	1.2024	511	206	2016-12-20
107	2	13.6	13.8667	4.85	3.44	0.6596	0.46784	1.12744	517	207	2016-12-21
107	2	13.6	13.8	5.03	3.4	0.68408	0.4624	1.14648	517	208	2016-12-22
107	2	14.2	14.2	4.94	3.4	0.70148	0.4828	1.18428	529	209	2016-12-23
107	2	14.8	14.7333	4.74	3.41	0.70152	0.50468	1.2062	512	210	2016-12-24
107	2	15.2	14.8667	4.57	3.43	0.69464	0.52136	1.216	520	211	2016-12-25
107	2	14.6	14.4667	4.56	3.42	0.66576	0.49932	1.16508	517	212	2016-12-26
107	2	13.6	14.1333	4.82	3.45	0.65552	0.4692	1.12472	540	213	2016-12-27
107	2	14.2	14.1333	4.72	3.39	0.67024	0.48138	1.15162	522	214	2016-12-28
107	2	14.6	14.7333	4.86	3.35	0.70956	0.4891	1.19866	530	215	2016-12-29
107	2	15.4	14.9333	4.75	3.34	0.7315	0.51436	1.24586	513	216	2016-12-30
107	2	14.8	13.8667	4.88	3.41	0.72224	0.50468	1.22692	518	217	2016-12-31
107	2	11.4	13.7	4.55	3.41	0.5187	0.38874	0.90744	513	218	2017-01-01
107	2	14.9	13.4333	4.71	3.47	0.70179	0.51703	1.21882	521	219	2017-01-02
107	2	14	14.3667	4.61	3.41	0.6454	0.4774	1.1228	511	220	2017-01-03
107	2	14.2	14.3333	4.88	3.38	0.69296	0.47996	1.17292	514	221	2017-01-04
107	2	14.8	14.5333	4.9	3.38	0.7252	0.50024	1.22544	519	222	2017-01-05
107	2	14.6	14.5333	5	3.41	0.73	0.49786	1.22786	518	223	2017-01-06
107	2	14.2	14.3667	4.78	3.42	0.67876	0.48564	1.1644	527	224	2017-01-07
107	2	14.3	14.4333	4.89	3.39	0.69927	0.48477	1.18404	527	225	2017-01-08
107	2	14.8	14.3	4.78	3.39	0.70744	0.50172	1.20916	532	226	2017-01-09
107	2	13.8	14.2	4.79	3.46	0.66102	0.47748	1.1385	516	227	2017-01-10
107	2	14	14.0333	4.6	3.44	0.644	0.4816	1.1256	518	228	2017-01-11
107	2	14.3	14.1333	4.47	3.42	0.63921	0.48906	1.12827	509	229	2017-01-12
107	2	14.1	13.9667	4.38	3.39	0.61758	0.47799	1.09557	535	230	2017-01-13
107	2	13.5	12.7333	4.54	3.43	0.6129	0.46305	1.07595	525	231	2017-01-14
107	2	10.6	12.2667	4.92	3.46	0.52152	0.36676	0.88828	534	232	2017-01-15
107	2	12.7	12.2	5.14	3.39	0.65278	0.43053	1.08331	529	233	2017-01-16
107	2	13.3	12.8333	5.08	3.35	0.67564	0.44555	1.12119	533	234	2017-01-17
107	2	12.5	13.2333	5.08	3.4	0.635	0.425	1.06	524	235	2017-01-18
107	2	13.9	13.2333	4.69	3.3	0.65191	0.4587	1.11061	535	236	2017-01-19
107	2	13.3	13.8667	4.74	3.27	0.63042	0.43491	1.06533	543	237	2017-01-20
107	2	14.4	13.9333	4.45	3.23	0.6408	0.46512	1.10592	542	238	2017-01-21
107	2	14.1	14.3667	4.85	3.33	0.68385	0.46953	1.15338	530	239	2017-01-22
107	2	14.6	14.4	4.78	3.37	0.69788	0.49202	1.1899	531	240	2017-01-23
107	2	14.5	14.4	4.91	3.41	0.71195	0.49445	1.2064	536	241	2017-01-24
107	2	14.1	14.4	4.82	3.44	0.67962	0.48504	1.16466	528	242	2017-01-25
107	2	14.6	14.3333	4.95	3.44	0.7227	0.50224	1.22494	526	243	2017-01-26
107	2	14.3	14.4667	4.74	3.42	0.67782	0.48906	1.16688	529	244	2017-01-27
107	2	14.5	15.0333	4.64	3.38	0.6728	0.4901	1.1629	530	245	2017-01-28
107	2	16.3	15.5	4.5	3.35	0.7335	0.54605	1.27955	533	246	2017-01-29
107	2	15.7	15.7333	4.48	3.34	0.70336	0.52438	1.22774	539	247	2017-01-30
107	2	15.2	15.5333	4.48	3.41	0.68096	0.51832	1.19928	541	248	2017-01-31
107	2	15.7	15.9	4.42	3.43	0.69394	0.53851	1.23245	541	249	2017-02-01
107	2	16.8	16.1	4.3	3.4	0.7224	0.5712	1.2936	538	250	2017-02-02
107	2	15.8	15.9	4.18	3.34	0.66044	0.52772	1.18816	541	251	2017-02-03
107	2	15.1	15.0667	4.21	3.38	0.63571	0.51038	1.14609	549	252	2017-02-04
107	2	14.3	14.8667	4.32	3.43	0.61776	0.49049	1.10825	539	253	2017-02-05
107	2	15.2	14.8333	4.54	3.44	0.69008	0.52288	1.21296	538	254	2017-02-06
107	2	15	15.3	4.69	3.43	0.7035	0.5145	1.218	545	255	2017-02-07
107	2	15.7	15.6	4.73	3.39	0.74261	0.53223	1.27484	542	256	2017-02-08
107	2	16.1	15.8333	4.84	3.35	0.77924	0.53935	1.31859	529	257	2017-02-09
107	2	15.7	15.5667	4.53	3.36	0.71121	0.52752	1.23873	548	258	2017-02-10
107	2	14.9	15.3333	4.52	3.39	0.67348	0.50511	1.17859	554	259	2017-02-11
107	2	15.4	15.1	4.63	3.38	0.71302	0.52052	1.23354	559	260	2017-02-12
107	2	15	15.6	4.71	3.27	0.7065	0.4905	1.197	552	261	2017-02-13
107	2	16.4	15.9333	4.68	3.22	0.76752	0.52808	1.2956	551	262	2017-02-14
107	2	16.4	15.9667	4.2	3.29	0.6888	0.53956	1.22836	552	263	2017-02-15
107	2	15.1	15.2	4.27	3.34	0.64477	0.50434	1.14911	570	264	2017-02-16
107	2	14.1	14.6	4.49	3.4	0.63309	0.4794	1.11249	550	265	2017-02-17
107	2	14.6	14.2333	4.73	3.4	0.69058	0.4964	1.18698	535	266	2017-02-18
107	2	14	14.2	4.84	3.36	0.6776	0.4704	1.148	568	267	2017-02-19
107	2	14	13.8667	4.71	3.38	0.6594	0.4732	1.1326	570	268	2017-02-20
107	2	13.6	13.8	4.69	3.34	0.63784	0.45424	1.09208	561	269	2017-02-21
107	2		10.75			0	0	0		270	2017-02-22
107	2	7.9	9.1	5.38	3.31	0.42502	0.26149	0.68651		271	2017-02-23
107	2	10.3	9.36667	5.5	3.3	0.5665	0.3399	0.9064	540	272	2017-02-24
107	2	9.9	9.73333	5.58	3.33	0.55242	0.32967	0.88209	543	273	2017-02-25
107	2	9	9.36667	5.1	3.3	0.459	0.297	0.756	558	274	2017-02-26
107	2	9.2	9.06667	5.45	3.29	0.5014	0.30268	0.80408	535	275	2017-02-27
107	2	9	9.2	5.5	3.37	0.495	0.3033	0.7983	539	276	2017-02-28
107	2	9.4	9.3	5.71	3.48	0.53674	0.32712	0.86386	545	277	2017-03-01
107	2	9.5	9.36667	5.52	3.72	0.5244	0.3534	0.8778	544	278	2017-03-02
107	2	9.2	8.73333	5.67	3.8	0.52164	0.3496	0.87124	538	279	2017-03-03
107	2	7.5	8.5	5.98	3.8	0.4485	0.285	0.7335	565	280	2017-03-04
107	2	8.8	8.4	5.94	3.78	0.52272	0.33264	0.85536	551	281	2017-03-05
107	2	8.9	8.8	6.08	3.73	0.54112	0.33197	0.87309	521	282	2017-03-06
107	2	8.7	8.93333	5.85	3.77	0.50895	0.32799	0.83694	556	283	2017-03-07
107	2	9.2	9.2	5.98	3.79	0.55016	0.34868	0.89884	546	284	2017-03-08
107	2	9.7	9.45	5.93	3.79	0.57521	0.36763	0.94284	549	285	2017-03-09
158	2	13.3	21.95	3.55	5.77	0.47215	0.76741	1.23956		-10	2016-03-14
158	2	30.6	21.6667	6.37	5.74	1.94922	1.75644	3.70566	497	-9	2016-03-15
158	2	21.1	24.3	5.95	5.59	1.25545	1.17949	2.43494	496	-8	2016-03-16
158	2	21.2	22.1667	7.19	5.38	1.52428	1.14056	2.66484	491	-7	2016-03-17
158	2	24.2	23.7	6.66	5.08	1.61172	1.22936	2.84108	501	-6	2016-03-18
158	2	25.7	25.1667	6.57	4.99	1.68849	1.28243	2.97092	514	-5	2016-03-19
158	2	25.6	26.5333	5.47	4.57	1.40032	1.16992	2.57024	508	-4	2016-03-20
158	2	28.3	26.8	5.69	4.73	1.61027	1.33859	2.94886	508	-3	2016-03-21
158	2	26.5	27.6333	5.52	4.64	1.4628	1.2296	2.6924	519	-2	2016-03-22
158	2	28.1	27.6	5.38	4.35	1.51178	1.22235	2.73413	518	-1	2016-03-23
158	2	28.2	28.0667	5.3	4.26	1.4946	1.20132	2.69592	520	0	2016-03-24
158	2	27.9	28.0333	5.18	4.15	1.44522	1.15785	2.60307	523	1	2016-03-25
158	2	28	27.4667	5.11	4.13	1.4308	1.1564	2.5872	512	2	2016-03-26
158	2	26.5	27.2333	5.05	4.16	1.33825	1.1024	2.44065	514	3	2016-03-27
158	2	27.2	27.2	5.01	4.11	1.36272	1.11792	2.48064	523	4	2016-03-28
158	2	27.9	27.5667	5.08	4.03	1.41732	1.12437	2.54169	502	5	2016-03-29
158	2	27.6	27.4667	5.11	4.05	1.41036	1.1178	2.52816	520	6	2016-03-30
158	2	26.9	27.6	4.96	3.97	1.33424	1.06793	2.40217	504	7	2016-03-31
158	2	28.3	27.6333	4.98	3.94	1.40934	1.11502	2.52436	517	8	2016-04-01
158	2	27.7	27.5	5.17	4.05	1.43209	1.12185	2.55394	520	9	2016-04-02
158	2	26.5	26.6333	4.93	4.01	1.30645	1.06265	2.3691	521	10	2016-04-03
158	2	25.7	26.0667	4.92	3.96	1.26444	1.01772	2.28216	520	11	2016-04-04
158	2	26	26.8	4.64	3.9	1.2064	1.014	2.2204	495	12	2016-04-05
158	2	28.7	27.4667	4.69	3.87	1.34603	1.11069	2.45672	525	13	2016-04-06
158	2	27.7	27.9	4.89	3.86	1.35453	1.06922	2.42375	532	14	2016-04-07
158	2	27.3	26.3333	4.95	3.92	1.35135	1.07016	2.42151	530	15	2016-04-08
158	2	24	25.7667	4.72	3.97	1.1328	0.9528	2.0856	551	16	2016-04-09
158	2	26	25.4667	4.69	3.95	1.2194	1.027	2.2464	545	17	2016-04-10
158	2	26.4	26.3333	4.83	3.91	1.27512	1.03224	2.30736	536	18	2016-04-11
158	2	26.6	26.4667	5.21	3.87	1.38586	1.02942	2.41528	516	19	2016-04-12
158	2	26.4	26.7333	5.08	3.89	1.34112	1.02696	2.36808	568	20	2016-04-13
158	2	27.2	26.7667	4.63	3.93	1.25936	1.06896	2.32832	534	21	2016-04-14
158	2	26.7	26.9333	4.36	3.97	1.16412	1.05999	2.22411	541	22	2016-04-15
158	2	26.9	26.8	5.17	3.95	1.39073	1.06255	2.45328	539	23	2016-04-16
158	2	26.8	27.4333	5.45	3.92	1.4606	1.05056	2.51116	546	24	2016-04-17
158	2	28.6	27.4333	5.42	3.92	1.55012	1.12112	2.67124	504	25	2016-04-18
158	2	26.9	27.3667	5.14	3.97	1.38266	1.06793	2.45059	516	26	2016-04-19
158	2	26.6	26.5	5.01	4	1.33266	1.064	2.39666	512	27	2016-04-20
158	2	26	26.3	4.89	3.96	1.2714	1.0296	2.301	535	28	2016-04-21
158	2	26.3	25.8333	4.97	3.95	1.30711	1.03885	2.34596	530	29	2016-04-22
158	2	25.2	26	5.35	3.97	1.3482	1.00044	2.34864	531	30	2016-04-23
158	2	26.5	25.9	4.99	3.9	1.32235	1.0335	2.35585	508	31	2016-04-24
158	2	26	26.0333	4.79	3.95	1.2454	1.027	2.2724	541	32	2016-04-25
158	2	25.6	25.4667	5.1	3.99	1.3056	1.02144	2.32704	540	33	2016-04-26
158	2	24.8	25.1667	5.29	3.97	1.31192	0.98456	2.29648	530	34	2016-04-27
158	2	25.1	24.9667	5.18	3.99	1.30018	1.00149	2.30167	543	35	2016-04-28
158	2	25	25.1667	5.25	3.99	1.3125	0.9975	2.31	539	36	2016-04-29
158	2	25.4	24.5667	5.01	3.99	1.27254	1.01346	2.286	550	37	2016-04-30
158	2	23.3	24.8333	5.05	4.04	1.17665	0.94132	2.11797	551	38	2016-05-01
158	2	25.8	24.9333	4.7	4.01	1.2126	1.03458	2.24718	546	39	2016-05-02
158	2	25.7	25.7333	5.18	4.02	1.33126	1.03314	2.3644	550	40	2016-05-03
158	2	25.7	25.4333	5.3	4.05	1.3621	1.04085	2.40295	528	41	2016-05-04
158	2	24.9	25.0667	5.45	4.07	1.35705	1.01343	2.37048	556	42	2016-05-05
158	2	24.6	24.6333	5.23	4.07	1.28658	1.00122	2.2878	550	43	2016-05-06
158	2	24.4	24.1	5.37	4.08	1.31028	0.99552	2.3058	541	44	2016-05-07
158	2	23.3	24.3333	5.41	4.14	1.26053	0.96462	2.22515	542	45	2016-05-08
158	2	25.3	24.5333	5.39	4.1	1.36367	1.0373	2.40097	612	46	2016-05-09
158	2	25	24.5333	5.49	4.07	1.3725	1.0175	2.39	539	47	2016-05-10
158	2	23.3	23.7333	5.66	4.07	1.31878	0.94831	2.26709	520	48	2016-05-11
158	2	22.9	23.2	6.03	4.08	1.38087	0.93432	2.31519	540	49	2016-05-12
158	2	23.4	23.4333	5.61	4.02	1.31274	0.94068	2.25342	525	50	2016-05-13
158	2	24	24.1667	5.67	4.06	1.3608	0.9744	2.3352	539	51	2016-05-14
158	2	25.1	24.7	5.4	4.03	1.3554	1.01153	2.36693	535	52	2016-05-15
158	2	25	24.5333	5.25	4	1.3125	1	2.3125	538	53	2016-05-16
158	2	23.5	24	5.48	4.02	1.2878	0.9447	2.2325	544	54	2016-05-17
158	2	23.5	23.9333	5.29	4.04	1.24315	0.9494	2.19255	540	55	2016-05-18
158	2	24.8	23.4	5.4	4	1.3392	0.992	2.3312	534	56	2016-05-19
158	2	21.9	22.9667	5.59	4.03	1.22421	0.88257	2.10678	594	57	2016-05-20
158	2	22.2	22.5667	5.62	4.08	1.24764	0.90576	2.1534	543	58	2016-05-21
158	2	23.6	23.0667	5.77	3.99	1.36172	0.94164	2.30336	542	59	2016-05-22
158	2	23.4	23.6333	5.5	4.04	1.287	0.94536	2.23236	559	60	2016-05-23
158	2	23.9	23.4667	5.58	4.05	1.33362	0.96795	2.30157	553	61	2016-05-24
158	2	23.1	21.2333	5.86	4.03	1.35366	0.93093	2.28459	559	62	2016-05-25
158	2	16.7	18	5.82	4.11	0.97194	0.68637	1.65831	497	63	2016-05-26
158	2	14.2	17.0333	6.28	4.1	0.89176	0.5822	1.47396	506	64	2016-05-27
158	2	20.2	18.7	5.54	3.65	1.11908	0.7373	1.85638	520	65	2016-05-28
158	2	21.7	21.5	4.74	3.55	1.02858	0.77035	1.79893	524	66	2016-05-29
158	2	22.6	22.6667	4.56	3.82	1.03056	0.86332	1.89388	538	67	2016-05-30
158	2	23.7	23.2333	5.91	4.01	1.40067	0.95037	2.35104	531	68	2016-05-31
158	2	23.4	22.5333	5.95	4.02	1.3923	0.94068	2.33298	540	69	2016-06-01
158	2	20.5	20.2	5.56	4.12	1.1398	0.8446	1.9844	525	70	2016-06-02
158	2	16.7	18.7667	5.44	4.13	0.90848	0.68971	1.59819	520	71	2016-06-03
158	2	19.1	19.0667	5.81	4.01	1.10971	0.76591	1.87562	507	72	2016-06-04
158	2	21.4	20.5	5.92	3.96	1.26688	0.84744	2.11432	522	73	2016-06-05
158	2	21	21.0667	5.95	3.9	1.2495	0.819	2.0685	546	74	2016-06-06
158	2	20.8	20.9667	5.53	3.93	1.15024	0.81744	1.96768	530	75	2016-06-07
158	2	21.1	21.8	5.24	3.97	1.10564	0.83767	1.94331	528	76	2016-06-08
158	2	23.5	22.4667	5.22	3.98	1.2267	0.9353	2.162	545	77	2016-06-09
158	2	22.8	23.1333	5.51	4.06	1.25628	0.92568	2.18196	620	78	2016-06-10
158	2	23.1	22.8333	5.48	4.11	1.26588	0.94941	2.21529	527	79	2016-06-11
158	2	22.6	22.9667	5.44	4.14	1.22944	0.93564	2.16508	542	80	2016-06-12
158	2	23.2	22.6	5.27	4.11	1.22264	0.95352	2.17616	548	81	2016-06-13
158	2	22	22.1333	5.1	4.08	1.122	0.8976	2.0196	551	82	2016-06-14
158	2	21.2	21.9333	5.51	4.1	1.16812	0.8692	2.03732	552	83	2016-06-15
158	2	22.6	21.9667	5.79	4	1.30854	0.904	2.21254	546	84	2016-06-16
158	2	22.1	21.8667	5.69	3.96	1.25749	0.87516	2.13265	562	85	2016-06-17
158	2	20.9	21.9667	5.99	4.03	1.25191	0.84227	2.09418	554	86	2016-06-18
158	2	22.9	22.4333	5.42	3.94	1.24118	0.90226	2.14344	542	87	2016-06-19
158	2	23.5	23.2333	5.29	3.9	1.24315	0.9165	2.15965	545	88	2016-06-20
158	2	23.3	23	5.21	3.94	1.21393	0.91802	2.13195	547	89	2016-06-21
158	2	22.2	23.1667	5.16	3.97	1.14552	0.88134	2.02686	535	90	2016-06-22
158	2	24	23.3333	5.22	3.94	1.2528	0.9456	2.1984	540	91	2016-06-23
158	2	23.8	23.5333	5.01	3.94	1.19238	0.93772	2.1301	501	92	2016-06-24
158	2	22.8	23.8	5.58	3.89	1.27224	0.88692	2.15916	522	93	2016-06-25
158	2	24.8	24.3333	5.29	3.84	1.31192	0.95232	2.26424	535	94	2016-06-26
158	2	25.4	25.2	5.39	3.83	1.36906	0.97282	2.34188	552	95	2016-06-27
158	2	25.4	25.3	5.24	3.93	1.33096	0.99822	2.32918	547	96	2016-06-28
158	2	25.1	25.2333	5.35	3.95	1.34285	0.99145	2.3343	552	97	2016-06-29
158	2	25.2	25.2333	5.2	3.93	1.3104	0.99036	2.30076	541	98	2016-06-30
158	2	25.4	24.8	5.07	3.89	1.28778	0.98806	2.27584	533	99	2016-07-01
158	2	23.8	24.4	4.98	3.86	1.18524	0.91868	2.10392	578	100	2016-07-02
158	2	24	23.8667	5.27	3.8	1.2648	0.912	2.1768	540	101	2016-07-03
158	2	23.8	23.9333	5.11	3.75	1.21618	0.8925	2.10868	559	102	2016-07-04
158	2	24	24.3333	5.05	3.76	1.212	0.9024	2.1144	526	103	2016-07-05
158	2	25.2	24.6333	5.01	3.77	1.26252	0.95004	2.21256	545	104	2016-07-06
158	2	24.7	24.6667	5.03	3.78	1.24241	0.93366	2.17607	547	105	2016-07-07
158	2	24.1	24.6	4.94	3.79	1.19054	0.91339	2.10393	547	106	2016-07-08
158	2	25	24.1667	5.25	3.79	1.3125	0.9475	2.26	549	107	2016-07-09
158	2	23.4	23.8667	5.28	3.77	1.23552	0.88218	2.1177	541	108	2016-07-10
158	2	23.2	23.4667	5.36	3.73	1.24352	0.86536	2.10888	536	109	2016-07-11
158	2	23.8	24.0333	5.13	3.72	1.22094	0.88536	2.1063	536	110	2016-07-12
158	2	25.1	24.6	5.05	3.73	1.26755	0.93623	2.20378	523	111	2016-07-13
158	2	24.9	25.6333	4.92	3.76	1.22508	0.93624	2.16132	543	112	2016-07-14
158	2	26.9	26.4667	5.12	3.74	1.37728	1.00606	2.38334	540	113	2016-07-15
158	2	27.6	25.7	5.36	3.72	1.47936	1.02672	2.50608	526	114	2016-07-16
158	2	22.6	24.8333	5.24	3.8	1.18424	0.8588	2.04304	517	115	2016-07-17
158	2	24.3	23.6333	5.4	3.79	1.3122	0.92097	2.23317	533	116	2016-07-18
158	2	24	24.1333	5.37	3.68	1.2888	0.8832	2.172	537	117	2016-07-19
158	2	24.1	24.3	5.31	3.69	1.27971	0.88929	2.169	530	118	2016-07-20
158	2	24.8	24.3333	5.02	3.66	1.24496	0.90768	2.15264	539	119	2016-07-21
158	2	24.1	24.1	4.75	3.71	1.14475	0.89411	2.03886	538	120	2016-07-22
158	2	23.4	23.9667	4.92	3.77	1.15128	0.88218	2.03346	542	121	2016-07-23
158	2	24.4	24.4667	5.23	3.76	1.27612	0.91744	2.19356	544	122	2016-07-24
158	2	25.6	25.0333	5.32	3.68	1.36192	0.94208	2.304	542	123	2016-07-25
158	2	25.1	25.0667	5.2	3.73	1.3052	0.93623	2.24143	584	124	2016-07-26
158	2	24.5	24.9333	5.22	3.78	1.2789	0.9261	2.205	540	125	2016-07-27
158	2	25.2	24.9333	5.15	3.79	1.2978	0.95508	2.25288	542	126	2016-07-28
158	2	25.1	24.8	4.83	3.75	1.21233	0.94125	2.15358	523	127	2016-07-29
158	2	24.1	24.3333	4.73	3.79	1.13993	0.91339	2.05332	551	128	2016-07-30
158	2	23.8	23.6333	5.19	3.82	1.23522	0.90916	2.14438	530	129	2016-07-31
158	2	23	22.7333	5.83	3.81	1.3409	0.8763	2.2172	566	130	2016-08-01
158	2	21.4	22.3333	5.63	3.79	1.20482	0.81106	2.01588	543	131	2016-08-02
158	2	22.6	22.2333	5.39	3.77	1.21814	0.85202	2.07016	544	132	2016-08-03
158	2	22.7	22.4	5.72	3.79	1.29844	0.86033	2.15877	537	133	2016-08-04
158	2	21.9	22.4333	5.64	3.83	1.23516	0.83877	2.07393	543	134	2016-08-05
158	2	22.7	22.4	5.3	3.85	1.2031	0.87395	2.07705	556	135	2016-08-06
158	2	22.6	22.4667	5.35	3.88	1.2091	0.87688	2.08598	531	136	2016-08-07
158	2	22.1	22.0667	5.49	3.88	1.21329	0.85748	2.07077	541	137	2016-08-08
158	2	21.5	21.4667	5.78	3.88	1.2427	0.8342	2.0769	521	138	2016-08-09
158	2	20.8	20.5	5.72	3.92	1.18976	0.81536	2.00512	490	139	2016-08-10
158	2	19.2	20.9667	6.11	3.91	1.17312	0.75072	1.92384	499	140	2016-08-11
158	2	22.9	21.1333	6.4	3.86	1.4656	0.88394	2.34954	541	141	2016-08-12
158	2	21.3	21.8333	5.78	3.88	1.23114	0.82644	2.05758	531	142	2016-08-13
158	2	21.3	21.9667	5.69	3.94	1.21197	0.83922	2.05119	523	143	2016-08-14
158	2	23.3	22.7	5.63	3.92	1.31179	0.91336	2.22515	536	144	2016-08-15
158	2	23.5	23.1667	5.77	3.93	1.35595	0.92355	2.2795	537	145	2016-08-16
158	2	22.7	23.2	5.66	3.92	1.28482	0.88984	2.17466	537	146	2016-08-17
158	2	23.4	22.8333	5.57	3.92	1.30338	0.91728	2.22066	541	147	2016-08-18
158	2	22.4	22.6667	5.57	3.93	1.24768	0.88032	2.128	536	148	2016-08-19
158	2	22.2	22.4333	5.55	3.91	1.2321	0.86802	2.10012	555	149	2016-08-20
158	2	22.7	22.5667	5.56	3.9	1.26212	0.8853	2.14742	534	150	2016-08-21
158	2	22.8	22.7	5.5	3.9	1.254	0.8892	2.1432	544	151	2016-08-22
158	2	22.6	22.7667	5.38	3.89	1.21588	0.87914	2.09502	544	152	2016-08-23
158	2	22.9	22.8667	5.42	3.92	1.24118	0.89768	2.13886	547	153	2016-08-24
158	2	23.1	22.9	5.27	3.9	1.21737	0.9009	2.11827	542	154	2016-08-25
158	2	22.7	22.6667	5.53	3.88	1.25531	0.88076	2.13607	533	155	2016-08-26
158	2	22.2	22.4	5.62	3.84	1.24764	0.85248	2.10012	540	156	2016-08-27
158	2	22.3	22.1	5.67	3.83	1.26441	0.85409	2.1185	531	157	2016-08-28
158	2	21.8	22.0333	5.39	3.82	1.17502	0.83276	2.00778	541	158	2016-08-29
158	2	22	21.5667	5.33	3.83	1.1726	0.8426	2.0152	537	159	2016-08-30
158	2	20.9	21.1667	5.11	3.82	1.06799	0.79838	1.86637	545	160	2016-08-31
158	2	20.6	20.7667	5.07	3.79	1.04442	0.78074	1.82516	533	161	2016-09-01
158	2	20.8	20.8667	5.04	3.77	1.04832	0.78416	1.83248	543	162	2016-09-02
158	2	21.2	20.9	5.14	3.76	1.08968	0.79712	1.8868	557	163	2016-09-03
158	2	20.7	21	5.22	3.77	1.08054	0.78039	1.86093	524	164	2016-09-04
158	2	21.1	21.1	5.28	3.76	1.11408	0.79336	1.90744	547	165	2016-09-05
158	2	21.5	21.1333	5.41	3.73	1.16315	0.80195	1.9651	530	166	2016-09-06
158	2	20.8	20.8667	5.11	3.71	1.06288	0.77168	1.83456	529	167	2016-09-07
158	2	20.3	20.5667	5.03	3.73	1.02109	0.75719	1.77828	547	168	2016-09-08
158	2	20.6	20.4333	4.97	3.71	1.02382	0.76426	1.78808	542	169	2016-09-09
158	2	20.4	20.9	4.89	3.7	0.99756	0.7548	1.75236	516	170	2016-09-10
158	2	21.7	20.9333	5.21	3.67	1.13057	0.79639	1.92696	539	171	2016-09-11
158	2	20.7	21.4	5.08	3.68	1.05156	0.76176	1.81332	536	172	2016-09-12
158	2	21.8	21.6333	5.14	3.7	1.12052	0.8066	1.92712	540	173	2016-09-13
158	2	22.4	21.7333	5.12	3.74	1.14688	0.83776	1.98464	529	174	2016-09-14
158	2	21	21.4	5.04	3.77	1.0584	0.7917	1.8501	574	175	2016-09-15
158	2	20.8	20.8333	4.85	3.8	1.0088	0.7904	1.7992	525	176	2016-09-16
158	2	20.7	20.7	4.95	3.74	1.02465	0.77418	1.79883	586	177	2016-09-17
158	2	20.6	20.5	4.88	3.7	1.00528	0.7622	1.76748	539	178	2016-09-18
158	2	20.2	20.5333	4.91	3.67	0.99182	0.74134	1.73316	545	179	2016-09-19
158	2	20.8	20.9	4.92	3.68	1.02336	0.76544	1.7888	530	180	2016-09-20
158	2	21.7	21.7	5.35	3.64	1.16095	0.78988	1.95083	538	181	2016-09-21
158	2	22.6	21.9667	5.34	3.67	1.20684	0.82942	2.03626	536	182	2016-09-22
158	2	21.6	22.3333	5.25	3.71	1.134	0.80136	1.93536	537	183	2016-09-23
158	2	22.8	22.0333	4.86	3.71	1.10808	0.84588	1.95396	530	184	2016-09-24
158	2	21.7	21.8333	4.61	3.69	1.00037	0.80073	1.8011	535	185	2016-09-25
158	2	21	21.4333	4.4	3.72	0.924	0.7812	1.7052	519	186	2016-09-26
158	2	21.6	21.4	4.71	3.71	1.01736	0.80136	1.81872	537	187	2016-09-27
158	2	21.6	21.4333	4.96	3.66	1.07136	0.79056	1.86192	543	188	2016-09-28
158	2	21.1	21	4.83	3.63	1.01913	0.76593	1.78506	538	189	2016-09-29
158	2	20.3	20.7667	5.17	3.65	1.04951	0.74095	1.79046	543	190	2016-09-30
158	2	20.9	20.7667	5.27	3.63	1.10143	0.75867	1.8601	545	191	2016-10-01
158	2	21.1	20.7	5.02	3.64	1.05922	0.76804	1.82726	542	192	2016-10-02
158	2	20.1	20.5333	4.87	3.65	0.97887	0.73365	1.71252	597	193	2016-10-03
158	2	20.4	20.2	4.95	3.65	1.0098	0.7446	1.7544	539	194	2016-10-04
158	2	20.1	20.5667	5.18	3.63	1.04118	0.72963	1.77081	540	195	2016-10-05
158	2	21.2	20.9667	5.3	3.59	1.1236	0.76108	1.88468	545	196	2016-10-06
158	2	21.6	20.8	5.33	3.62	1.15128	0.78192	1.9332	534	197	2016-10-07
158	2	19.6	20.6667	5.27	3.68	1.03292	0.72128	1.7542	553	198	2016-10-08
158	2	20.8	19.9	5.31	3.68	1.10448	0.76544	1.86992	543	199	2016-10-09
158	2	19.3	19.3	5.16	3.68	0.99588	0.71024	1.70612	553	200	2016-10-10
158	2	17.8	18.1333	5.69	3.61	1.01282	0.64258	1.6554	622	201	2016-10-11
158	2	17.3	18.0333	5.5	3.62	0.9515	0.62626	1.57776	551	202	2016-10-12
158	2	19	18.2667	5.38	3.62	1.0222	0.6878	1.71	544	203	2016-10-13
158	2	18.5	18.5333	5.22	3.62	0.9657	0.6697	1.6354	554	204	2016-10-14
158	2	18.1	18.2667	4.81	3.66	0.87061	0.66246	1.53307	569	205	2016-10-15
158	2	18.2	12.1	4.88	3.69	0.88816	0.67158	1.55974	549	206	2016-10-16
158	2	0	8.4			0	0	0		207	2016-10-17
158	2	7	7.86667	5.43	3.63	0.3801	0.2541	0.6342	520	208	2016-10-18
158	2	16.6	13.4333	5.37	3.63	0.89142	0.60258	1.494	543	209	2016-10-19
158	2	16.7	17.0667	5.45	3.54	0.91015	0.59118	1.50133	513	210	2016-10-20
158	2	17.9	17.9333	4.96	3.43	0.88784	0.61397	1.50181	501	211	2016-10-21
158	2	19.2	19.0333	4.53	3.28	0.86976	0.62976	1.49952	514	212	2016-10-22
158	2	20	19.8333	4.33	3.23	0.866	0.646	1.512	526	213	2016-10-23
158	2	20.3	20.4	4.27	3.28	0.86681	0.66584	1.53265	531	214	2016-10-24
158	2	20.9	20.7667	4.28	3.36	0.89452	0.70224	1.59676	539	215	2016-10-25
158	2	21.1	21	4.27	3.42	0.90097	0.72162	1.62259	541	216	2016-10-26
158	2	21	21.2333	4.32	3.43	0.9072	0.7203	1.6275	545	217	2016-10-27
158	2	21.6	21.2667	4.22	3.43	0.91152	0.74088	1.6524	552	218	2016-10-28
158	2	21.2	21.3	4.22	3.46	0.89464	0.73352	1.62816	548	219	2016-10-29
158	2	21.1	21.3333	4.06	3.49	0.85666	0.73639	1.59305	547	220	2016-10-30
158	2	21.7	21.2667	4.27	3.47	0.92659	0.75299	1.67958	555	221	2016-10-31
158	2	21	21.1333	4.22	3.49	0.8862	0.7329	1.6191	548	222	2016-11-01
158	2	20.7	20.6667	4.49	3.5	0.92943	0.7245	1.65393	543	223	2016-11-02
158	2	20.3	20.2667	4.35	3.52	0.88305	0.71456	1.59761	547	224	2016-11-03
158	2	19.8	20.2667	4.71	3.52	0.93258	0.69696	1.62954	542	225	2016-11-04
158	2	20.7	20.1	4.67	3.55	0.96669	0.73485	1.70154	544	226	2016-11-05
158	2	19.8	20.1333	4.7	3.57	0.9306	0.70686	1.63746	554	227	2016-11-06
158	2	19.9	19.7333	4.51	3.59	0.89749	0.71441	1.6119	536	228	2016-11-07
158	2	19.5	19.7667	4.28	3.61	0.8346	0.70395	1.53855	555	229	2016-11-08
158	2	19.9	19.7	4.5	3.56	0.8955	0.70844	1.60394	547	230	2016-11-09
158	2	19.7	19.4333	4.54	3.57	0.89438	0.70329	1.59767	552	231	2016-11-10
158	2	18.7	19.1	4.87	3.61	0.91069	0.67507	1.58576	529	232	2016-11-11
158	2	18.9	19.1333	4.83	3.63	0.91287	0.68607	1.59894	551	233	2016-11-12
158	2	19.8	19.5333	4.76	3.58	0.94248	0.70884	1.65132	551	234	2016-11-13
158	2	19.9	19.7667	4.61	3.62	0.91739	0.72038	1.63777	569	235	2016-11-14
158	2	19.6	18.8	4.93	3.7	0.96628	0.7252	1.69148	546	236	2016-11-15
158	2	16.9	18.4333	5.15	3.86	0.87035	0.65234	1.52269	554	237	2016-11-16
158	2	18.8	17.8333	5.2	3.79	0.9776	0.71252	1.69012	542	238	2016-11-17
158	2	17.8	18.1	5.05	3.81	0.8989	0.67818	1.57708	556	239	2016-11-18
158	2	17.7	17.6667	5.26	3.77	0.93102	0.66729	1.59831	543	240	2016-11-19
158	2	17.5	17.5	5.29	3.77	0.92575	0.65975	1.5855	548	241	2016-11-20
158	2	17.3	17.4	5.52	3.82	0.95496	0.66086	1.61582	561	242	2016-11-21
158	2	17.4	17.35	5.33	3.86	0.92742	0.67164	1.59906	548	243	2016-11-22
158	2		17.5			0	0	0		244	2016-11-23
158	2	17.6	17.4	5.21	3.89	0.91696	0.68464	1.6016		245	2016-11-24
158	2	17.2	17.3	5.19	3.88	0.89268	0.66736	1.56004	560	246	2016-11-25
158	2	17.1	17.1333	5.45	3.9	0.93195	0.6669	1.59885	565	247	2016-11-26
158	2	17.1	16.8667	5.52	3.91	0.94392	0.66861	1.61253	572	248	2016-11-27
158	2	16.4	16.6667	5.52	3.94	0.90528	0.64616	1.55144	535	249	2016-11-28
158	2	16.5	16.4333	5.36	3.97	0.8844	0.65505	1.53945	568	250	2016-11-29
158	2	16.4	15.9667	5.98	4.01	0.98072	0.65764	1.63836	553	251	2016-11-30
158	2	15	15.5667	6.24	4.04	0.936	0.606	1.542	575	252	2016-12-01
158	2	15.3	15.3	6.34	4.03	0.97002	0.61659	1.58661	563	253	2016-12-02
158	2	15.6	15.5	6.1	4.01	0.9516	0.62556	1.57716	554	254	2016-12-03
158	2	15.6	15.9	6.2	4	0.9672	0.624	1.5912	558	255	2016-12-04
158	2	16.5	16.1	6.06	4.02	0.9999	0.6633	1.6632	557	256	2016-12-05
158	2	16.2	15.9	6.43	4.07	1.04166	0.65934	1.701	540	257	2016-12-06
158	2	15	15.4333	6.55	4.13	0.9825	0.6195	1.602	537	258	2016-12-07
158	2	15.1	15.0333	6.3	4.11	0.9513	0.62061	1.57191	565	259	2016-12-08
158	2	15	15.2	6.02	4.08	0.903	0.612	1.515	586	260	2016-12-09
158	2	15.5	15.1333	6.09	4.03	0.94395	0.62465	1.5686	559	261	2016-12-10
158	2	14.9	14.8667	5.89	4	0.87761	0.596	1.47361	560	262	2016-12-11
158	2	14.2	14.9667	6.24	3.97	0.88608	0.56374	1.44982	544	263	2016-12-12
158	2	15.8	14.9667	6.26	3.96	0.98908	0.62568	1.61476	570	264	2016-12-13
158	2	14.9	15.0333	6.81	4.01	1.01469	0.59749	1.61218	561	265	2016-12-14
158	2	14.4	14.7	6.73	4.04	0.96912	0.58176	1.55088	558	266	2016-12-15
158	2	14.8	15.1	6.96	4.02	1.03008	0.59496	1.62504	553	267	2016-12-16
158	2	16.1	15.6667	6.71	3.99	1.08031	0.64239	1.7227	556	268	2016-12-17
158	2	16.1	15.9	6.28	4.01	1.01108	0.64561	1.65669	558	269	2016-12-18
158	2	15.5	15.4333	6.14	4.03	0.9517	0.62465	1.57635	563	270	2016-12-19
158	2	14.7	14.8667	6.47	4.02	0.95109	0.59094	1.54203	562	271	2016-12-20
158	2	14.4	14.6667	6.37	3.93	0.91728	0.56592	1.4832	563	272	2016-12-21
158	2	14.9	15.1	6.38	3.93	0.95062	0.58557	1.53619	545	273	2016-12-22
158	2	16	15.6667	6.2	3.93	0.992	0.6288	1.6208	561	274	2016-12-23
158	2	16.1	16.0667	6.09	3.91	0.98049	0.62951	1.61	550	275	2016-12-24
158	2	16.1	16.0667	5.9	3.95	0.9499	0.63595	1.58585	567	276	2016-12-25
158	2	16	15.9667	5.78	3.97	0.9248	0.6352	1.56	574	277	2016-12-26
158	2	15.8	15.7667	5.84	3.98	0.92272	0.62884	1.55156	578	278	2016-12-27
158	2	15.5	15.8333	6.42	3.94	0.9951	0.6107	1.6058	555	279	2016-12-28
158	2	16.2	16	6.29	3.92	1.01898	0.63504	1.65402	569	280	2016-12-29
158	2	16.3	16.4333	6.54	3.94	1.06602	0.64222	1.70824	574	281	2016-12-30
158	2	16.8	16.8333	6.35	3.97	1.0668	0.66696	1.73376	571	282	2016-12-31
158	2	17.4	16.6	6.18	3.98	1.07532	0.69252	1.76784	580	283	2017-01-01
158	2	15.6	16.4333	6.17	3.98	0.96252	0.62088	1.5834	587	284	2017-01-02
158	2	16.3	16.1333	5.92	3.9	0.96496	0.6357	1.60066	567	285	2017-01-03
158	2	16.5	16.4	6.28	3.87	1.0362	0.63855	1.67475	569	286	2017-01-04
158	2	16.4	16.0333	6.18	3.85	1.01352	0.6314	1.64492	558	287	2017-01-05
158	2	15.2	15.7333	6.28	3.88	0.95456	0.58976	1.54432	562	288	2017-01-06
158	2	15.6	15.2333	6.27	3.87	0.97812	0.60372	1.58184	561	289	2017-01-07
158	2	14.9	15.3333	6.45	3.85	0.96105	0.57365	1.5347	565	290	2017-01-08
158	2	15.5	14.9667	6.54	3.83	1.0137	0.59365	1.60735	558	291	2017-01-09
158	2	14.5	15.0667	6.46	3.84	0.9367	0.5568	1.4935	561	292	2017-01-10
158	2	15.2	15.3333	6.5	3.83	0.988	0.58216	1.57016	563	293	2017-01-11
158	2	16.3	16.3	6.58	3.84	1.07254	0.62592	1.69846	574	294	2017-01-12
158	2	17.4	16.8667	5.85	3.88	1.0179	0.67512	1.69302	563	295	2017-01-13
158	2	16.9	16.8333	5.91	3.9	0.99879	0.6591	1.65789	567	296	2017-01-14
158	2	16.2	16.6333	6.12	3.94	0.99144	0.63828	1.62972	579	297	2017-01-15
158	2	16.8	16.6	6.24	3.96	1.04832	0.66528	1.7136	564	298	2017-01-16
158	2	16.8	16.7667	6.28	3.93	1.05504	0.66024	1.71528	614	299	2017-01-17
158	2	16.7	16	6.14	3.91	1.02538	0.65297	1.67835	565	300	2017-01-18
158	2	14.5	15.5333	6.13	3.91	0.88885	0.56695	1.4558	596	301	2017-01-19
158	2	15.4	15.6333	6.06	3.86	0.93324	0.59444	1.52768	612	302	2017-01-20
158	2	17	16.3	6.07	3.81	1.0319	0.6477	1.6796	577	303	2017-01-21
158	2	16.5	15.9333	6.05	3.82	0.99825	0.6303	1.62855	571	304	2017-01-22
158	2	14.3	15	6.01	3.78	0.85943	0.54054	1.39997	594	305	2017-01-23
158	2	14.2	14.4333	6.08	3.82	0.86336	0.54244	1.4058	563	306	2017-01-24
158	2	14.8	14.6333	6.26	3.86	0.92648	0.57128	1.49776	570	307	2017-01-25
158	2	14.9	14.5	6.2	3.84	0.9238	0.57216	1.49596	579	308	2017-01-26
158	2	13.8	14	6.31	3.84	0.87078	0.52992	1.4007	575	309	2017-01-27
158	2	13.3	14	6.38	3.85	0.84854	0.51205	1.36059	571	310	2017-01-28
158	2	14.9	14.2333	6.68	3.87	0.99532	0.57663	1.57195	579	311	2017-01-29
158	2	14.5	14.8	6.43	3.84	0.93235	0.5568	1.48915	575	312	2017-01-30
158	2	15	14.7333	6.48	3.87	0.972	0.5805	1.5525	577	313	2017-01-31
158	2	14.7	14.7667	6.41	3.87	0.94227	0.56889	1.51116	581	314	2017-02-01
158	2	14.6	14.5333	6.3	3.88	0.9198	0.56648	1.48628	580	315	2017-02-02
158	2	14.3	14.3333	6.25	3.89	0.89375	0.55627	1.45002	581	316	2017-02-03
158	2	14.1	14.9	6.64	3.9	0.93624	0.5499	1.48614	573	317	2017-02-04
158	2	16.3	14.7	6.27	3.79	1.02201	0.61777	1.63978	584	318	2017-02-05
158	2	13.7	14.5333	5.88	3.82	0.80556	0.52334	1.3289	585	319	2017-02-06
158	2	13.6	13.6667	6.01	3.83	0.81736	0.52088	1.33824	592	320	2017-02-07
158	2	13.7	13.5	6.12	3.89	0.83844	0.53293	1.37137	584	321	2017-02-08
158	2	13.2	13.2	6.21	3.87	0.81972	0.51084	1.33056	583	322	2017-02-09
158	2	12.7	12.9667	6.26	3.85	0.79502	0.48895	1.28397	596	323	2017-02-10
158	2	13	12.4	6.13	3.85	0.7969	0.5005	1.2974	597	324	2017-02-11
158	2	11.5	12.4667	6.55	3.85	0.75325	0.44275	1.196	582	325	2017-02-12
158	2	12.9	12.2667	6.68	3.79	0.86172	0.48891	1.35063	573	326	2017-02-13
158	2	12.4	12.8667	6.27	3.74	0.77748	0.46376	1.24124	582	327	2017-02-14
158	2	13.3	12.8	6.12	3.79	0.81396	0.50407	1.31803	593	328	2017-02-15
158	2	12.7	12.9	6.12	3.86	0.77724	0.49022	1.26746	584	329	2017-02-16
158	2	12.7	12.3	6.23	3.92	0.79121	0.49784	1.28905	574	330	2017-02-17
158	2	11.5	11.7	6.24	3.96	0.7176	0.4554	1.173	589	331	2017-02-18
158	2	10.9	11.5333	6.17	3.94	0.67253	0.42946	1.10199	687	332	2017-02-19
158	2	12.2	11.55	6.01	3.92	0.73322	0.47824	1.21146	578	333	2017-02-20
183	3	3.7	7.05	5.39	5.92	0.19943	0.21904	0.41847		-89	2016-04-06
183	3	10.4	9.16667	5.85	5.61	0.6084	0.58344	1.19184	562	-88	2016-04-07
183	3	13.4	13.0333	7.06	5.49	0.94604	0.73566	1.6817	541	-87	2016-04-08
183	3	15.3	15.0667	6.93	5.38	1.06029	0.82314	1.88343	526	-86	2016-04-09
183	3	16.5	16.6	6.07	5.19	1.00155	0.85635	1.8579	541	-85	2016-04-10
183	3	18	17.8667	5.75	5.02	1.035	0.9036	1.9386	545	-84	2016-04-11
183	3	19.1	18.9667	5.25	4.84	1.00275	0.92444	1.92719	551	-83	2016-04-12
183	3	19.8	19.9	5.01	4.73	0.99198	0.93654	1.92852	531	-82	2016-04-13
183	3	20.8	20.8	5.22	4.66	1.08576	0.96928	2.05504	540	-81	2016-04-14
183	3	21.8	21.4	5.2	4.53	1.1336	0.98754	2.12114	561	-80	2016-04-15
183	3	21.6	21.7333	5.1	4.46	1.1016	0.96336	2.06496	539	-79	2016-04-16
183	3	21.8	21.8667	4.86	4.41	1.05948	0.96138	2.02086	556	-78	2016-04-17
183	3	22.2	21.8333	4.99	4.37	1.10778	0.97014	2.07792	569	-77	2016-04-18
183	3	21.5	21.9333	4.91	4.35	1.05565	0.93525	1.9909	563	-76	2016-04-19
183	3	22.1	22.1	5.19	4.28	1.14699	0.94588	2.09287	567	-75	2016-04-20
183	3	22.7	22	5.05	4.2	1.14635	0.9534	2.09975	560	-74	2016-04-21
183	3	21.2	21.9333	5.12	4.21	1.08544	0.89252	1.97796	563	-73	2016-04-22
183	3	21.9	21.2	5.26	4.21	1.15194	0.92199	2.07393	569	-72	2016-04-23
183	3	20.5	22.2	4.9	4.16	1.0045	0.8528	1.8573	581	-71	2016-04-24
183	3	24.2	22	4.81	4.06	1.16402	0.98252	2.14654	579	-70	2016-04-25
183	3	21.3	23.2333	5.75	4.07	1.22475	0.86691	2.09166	581	-69	2016-04-26
183	3	24.2	22.9333	5.47	4.06	1.32374	0.98252	2.30626	568	-68	2016-04-27
183	3	23.3	23.4	5.24	4.07	1.22092	0.94831	2.16923	575	-67	2016-04-28
183	3	22.7	23.3667	5.04	4.04	1.14408	0.91708	2.06116	574	-66	2016-04-29
183	3	24.1	23.6667	4.78	4.02	1.15198	0.96882	2.1208	571	-65	2016-04-30
183	3	24.2	24.4333	5.05	3.99	1.2221	0.96558	2.18768	577	-64	2016-05-01
183	3	25	24.7667	5.07	3.95	1.2675	0.9875	2.255	581	-63	2016-05-02
183	3	25.1	24.8667	5.36	3.98	1.34536	0.99898	2.34434	581	-62	2016-05-03
183	3	24.5	24.7	5.44	3.99	1.3328	0.97755	2.31035	590	-61	2016-05-04
183	3	24.5	24.3667	5.22	4	1.2789	0.98	2.2589	588	-60	2016-05-05
183	3	24.1	24.2	5.03	3.9	1.21223	0.9399	2.15213	583	-59	2016-05-06
183	3	24	24.0333	5.18	4	1.2432	0.96	2.2032	580	-58	2016-05-07
183	3	24	24.0333	5.5	3.97	1.32	0.9528	2.2728	599	-57	2016-05-08
183	3	24.1	24.2333	5.46	3.97	1.31586	0.95677	2.27263	586	-56	2016-05-09
183	3	24.6	25.1667	4.86	3.87	1.19556	0.95202	2.14758	602	-55	2016-05-10
183	3	26.8	25.9333	4.99	3.91	1.33732	1.04788	2.3852	603	-54	2016-05-11
183	3	26.4	26.0333	5.23	3.97	1.38072	1.04808	2.4288	605	-53	2016-05-12
183	3	24.9	25.3333	5.24	3.97	1.30476	0.98853	2.29329	601	-52	2016-05-13
183	3	24.7	24.8667	5.42	3.97	1.33874	0.98059	2.31933	597	-51	2016-05-14
183	3	25	24.8667	5.13	3.87	1.2825	0.9675	2.25	601	-50	2016-05-15
183	3	24.9	24.9333	5.42	3.94	1.34958	0.98106	2.33064	598	-49	2016-05-16
183	3	24.9	25	5.36	3.89	1.33464	0.96861	2.30325	605	-48	2016-05-17
183	3	25.2	25.0667	5.19	3.86	1.30788	0.97272	2.2806	600	-47	2016-05-18
183	3	25.1	25.0333	5.13	3.88	1.28763	0.97388	2.26151	596	-46	2016-05-19
183	3	24.8	25.0333	5.18	3.88	1.28464	0.96224	2.24688	594	-45	2016-05-20
183	3	25.2	24.8667	4.89	3.81	1.23228	0.96012	2.1924	602	-44	2016-05-21
183	3	24.6	24.5	4.88	3.84	1.20048	0.94464	2.14512	607	-43	2016-05-22
183	3	23.7	23.8	5.24	3.87	1.24188	0.91719	2.15907	596	-42	2016-05-23
183	3	23.1	23.3667	5.25	3.77	1.21275	0.87087	2.08362	593	-41	2016-05-24
183	3	23.3	23.2667	5.22	3.71	1.21626	0.86443	2.08069	589	-40	2016-05-25
183	3	23.4	23.6667	5.22	3.74	1.22148	0.87516	2.09664	597	-39	2016-05-26
183	3	24.3	23.8	5.05	3.7	1.22715	0.8991	2.12625	588	-38	2016-05-27
183	3	23.7	24.0667	5.14	3.73	1.21818	0.88401	2.10219	597	-37	2016-05-28
183	3	24.2	23.2667	5.18	3.74	1.25356	0.90508	2.15864	599	-36	2016-05-29
183	3	21.9	23.5333	4.77	3.75	1.04463	0.82125	1.86588	598	-35	2016-05-30
183	3	24.5	23.4333	5.07	3.79	1.24215	0.92855	2.1707	594	-34	2016-05-31
183	3	23.9	24.1	5.71	3.75	1.36469	0.89625	2.26094	604	-33	2016-06-01
183	3	23.9	23.6333	5.19	3.75	1.24041	0.89625	2.13666	606	-32	2016-06-02
183	3	23.1	23.7333	4.89	3.74	1.12959	0.86394	1.99353	593	-31	2016-06-03
183	3	24.2	23.4333	5.28	3.76	1.27776	0.90992	2.18768	602	-30	2016-06-04
183	3	23	23.4333	5.07	3.78	1.1661	0.8694	2.0355	601	-29	2016-06-05
183	3	23.1	22.8	4.66	3.62	1.07646	0.83622	1.91268	605	-28	2016-06-06
183	3	22.3	23.3333	4.92	3.58	1.09716	0.79834	1.8955	611	-27	2016-06-07
183	3	24.6	23.4333	5.27	3.67	1.29642	0.90282	2.19924	610	-26	2016-06-08
183	3	23.4	23	5.2	3.69	1.2168	0.86346	2.08026	607	-25	2016-06-09
183	3	21	22.6333	5.04	3.69	1.0584	0.7749	1.8333	605	-24	2016-06-10
183	3	23.5	22.6	5.13	3.72	1.20555	0.8742	2.07975	615	-23	2016-06-11
183	3	23.3	23.3333	5.39	3.72	1.25587	0.86676	2.12263	606	-22	2016-06-12
183	3	23.2	23.1667	5.45	3.73	1.2644	0.86536	2.12976	607	-21	2016-06-13
183	3	23	23.1667	5.58	3.74	1.2834	0.8602	2.1436	613	-20	2016-06-14
183	3	23.3	23.1667	5.74	3.75	1.33742	0.87375	2.21117	619	-19	2016-06-15
183	3	23.2	23.3	5.6	3.7	1.2992	0.8584	2.1576	618	-18	2016-06-16
183	3	23.4	23.2667	5.94	3.7	1.38996	0.8658	2.25576	612	-17	2016-06-17
183	3	23.2	23.4	5.57	3.68	1.29224	0.85376	2.146	596	-16	2016-06-18
183	3	23.6	23.8	5.56	3.69	1.31216	0.87084	2.183	618	-15	2016-06-19
183	3	24.6	23.8333	5.47	3.67	1.34562	0.90282	2.24844	616	-14	2016-06-20
183	3	23.3	24.3667	5.55	3.68	1.29315	0.85744	2.15059	608	-13	2016-06-21
183	3	25.2	23.7333	5.61	3.68	1.41372	0.92736	2.34108	625	-12	2016-06-22
183	3	22.7	24.2667	5.24	3.66	1.18948	0.83082	2.0203	617	-11	2016-06-23
183	3	24.9	24.3	5.45	3.66	1.35705	0.91134	2.26839	584	-10	2016-06-24
183	3	25.3	25	5.44	3.58	1.37632	0.90574	2.28206	614	-9	2016-06-25
183	3	24.8	24.5333	5.54	3.59	1.37392	0.89032	2.26424	621	-8	2016-06-26
183	3	23.5	24.5667	5.4	3.56	1.269	0.8366	2.1056	612	-7	2016-06-27
183	3	25.4	24.9667	5.62	3.55	1.42748	0.9017	2.32918	609	-6	2016-06-28
183	3	26	25.4	5.31	3.53	1.3806	0.9178	2.2984	619	-5	2016-06-29
183	3	24.8	25.2	5.43	3.55	1.34664	0.8804	2.22704	635	-4	2016-06-30
183	3	24.8	24.8667	5.49	3.54	1.36152	0.87792	2.23944	613	-3	2016-07-01
183	3	25	26.7	4.98	3.55	1.245	0.8875	2.1325	584	-2	2016-07-02
183	3	30.3	26.9	5.29	3.46	1.60287	1.04838	2.65125	614	-1	2016-07-03
183	3	25.4	27.2667	5.73	3.48	1.45542	0.88392	2.33934	604	0	2016-07-04
183	3	26.1	25.0667	5.48	3.51	1.43028	0.91611	2.34639	607	1	2016-07-05
183	3	23.7	25.4667	5.35	3.49	1.26795	0.82713	2.09508	601	2	2016-07-06
183	3	26.6	25.2667	5.07	3.31	1.34862	0.88046	2.22908	615	3	2016-07-07
183	3	25.5	25.9667	4.94	3.36	1.2597	0.8568	2.1165	616	4	2016-07-08
183	3	25.8	25.8667	5.43	3.44	1.40094	0.88752	2.28846	629	5	2016-07-09
183	3	26.3	25.4667	5.51	3.47	1.44913	0.91261	2.36174	625	6	2016-07-10
183	3	24.3	25.3667	5.28	3.51	1.28304	0.85293	2.13597	625	7	2016-07-11
183	3	25.5	24.6	5.56	3.47	1.4178	0.88485	2.30265	630	8	2016-07-12
183	3	24	24.4	5.49	3.46	1.3176	0.8304	2.148	628	9	2016-07-13
183	3	23.7	23.9667	5.55	3.52	1.31535	0.83424	2.14959	615	10	2016-07-14
183	3	24.2	24.0667	5.59	3.53	1.35278	0.85426	2.20704	617	11	2016-07-15
183	3	24.3	24.4667	5.16	3.49	1.25388	0.84807	2.10195	620	12	2016-07-16
183	3	24.9	24.7	5.81	3.5	1.44669	0.8715	2.31819	687	13	2016-07-17
183	3	24.9	24.8	5.76	3.5	1.43424	0.8715	2.30574	627	14	2016-07-18
183	3	24.6	24.8667	5.25	3.48	1.2915	0.85608	2.14758	620	15	2016-07-19
183	3	25.1	25.0333	5.14	3.52	1.29014	0.88352	2.17366	627	16	2016-07-20
183	3	25.4	25.2	5.21	3.49	1.32334	0.88646	2.2098	632	17	2016-07-21
183	3	25.1	23.7333	5.85	3.48	1.46835	0.87348	2.34183	628	18	2016-07-22
183	3	20.7	23.6333	5.82	3.48	1.20474	0.72036	1.9251	595	19	2016-07-23
183	3	25.1	23.7667	5.76	3.38	1.44576	0.84838	2.29414	596	20	2016-07-24
183	3	25.5	25.5333	5.57	3.35	1.42035	0.85425	2.2746	626	21	2016-07-25
183	3	26	25.6333	5.5	3.43	1.43	0.8918	2.3218	621	22	2016-07-26
183	3	25.4	25.8333	5.61	3.46	1.42494	0.87884	2.30378	625	23	2016-07-27
183	3	26.1	25.8	5.5	3.45	1.4355	0.90045	2.33595	624	24	2016-07-28
183	3	25.9	26.0333	5.19	3.45	1.34421	0.89355	2.23776	624	25	2016-07-29
183	3	26.1	25.6333	5	3.44	1.305	0.89784	2.20284	633	26	2016-07-30
183	3	24.9	24.7333	5.25	3.52	1.30725	0.87648	2.18373	636	27	2016-07-31
183	3	23.2	23.5	5.74	3.61	1.33168	0.83752	2.1692	617	28	2016-08-01
183	3	22.4	23.3	5.6	3.52	1.2544	0.78848	2.04288	634	29	2016-08-02
183	3	24.3	23.2667	5.91	3.5	1.43613	0.8505	2.28663	638	30	2016-08-03
183	3	23.1	23.1667	6.11	3.54	1.41141	0.81774	2.22915	624	31	2016-08-04
183	3	22.1	22.5333	6.16	3.58	1.36136	0.79118	2.15254	620	32	2016-08-05
183	3	22.4	22.1	5.65	3.52	1.2656	0.78848	2.05408	621	33	2016-08-06
183	3	21.8	22.2	5.64	3.52	1.22952	0.76736	1.99688	636	34	2016-08-07
183	3	22.4	22.3333	5.6	3.5	1.2544	0.784	2.0384	629	35	2016-08-08
183	3	22.8	22.1667	5.75	3.53	1.311	0.80484	2.11584	654	36	2016-08-09
183	3	21.3	22	6.06	3.58	1.29078	0.76254	2.05332	631	37	2016-08-10
183	3	21.9	21.7	6.06	3.61	1.32714	0.79059	2.11773	637	38	2016-08-11
183	3	21.9	21.4333	5.76	3.58	1.26144	0.78402	2.04546	629	39	2016-08-12
183	3	20.5	21.1667	6.26	3.64	1.2833	0.7462	2.0295	621	40	2016-08-13
183	3	21.1	20.5	6.28	3.65	1.32508	0.77015	2.09523	635	41	2016-08-14
183	3	19.9	20.5667	6.01	3.59	1.19599	0.71441	1.9104	638	42	2016-08-15
183	3	20.7	20.5667	5.73	3.52	1.18611	0.72864	1.91475	634	43	2016-08-16
183	3	21.1	21.1667	5.92	3.56	1.24912	0.75116	2.00028	640	44	2016-08-17
183	3	21.7	21.6667	5.99	3.59	1.29983	0.77903	2.07886	628	45	2016-08-18
183	3	22.2	22	6.29	3.66	1.39638	0.81252	2.2089	641	46	2016-08-19
183	3	22.1	21.8333	5.67	3.53	1.25307	0.78013	2.0332	635	47	2016-08-20
183	3	21.2	21.6333	5.88	3.49	1.24656	0.73988	1.98644	704	48	2016-08-21
183	3	21.6	21.2667	6.11	3.58	1.31976	0.77328	2.09304	634	49	2016-08-22
183	3	21	21.1667	6.2	3.57	1.302	0.7497	2.0517	641	50	2016-08-23
183	3	20.9	21.2	6.17	3.59	1.28953	0.75031	2.03984	640	51	2016-08-24
183	3	21.7	21.3	5.93	3.56	1.28681	0.77252	2.05933	645	52	2016-08-25
183	3	21.3	21.3667	5.99	3.54	1.27587	0.75402	2.02989	639	53	2016-08-26
183	3	21.1	21.1	6.35	3.62	1.33985	0.76382	2.10367	640	54	2016-08-27
183	3	20.9	21.3333	6.13	3.56	1.28117	0.74404	2.02521	636	55	2016-08-28
183	3	22	21.2333	6	3.53	1.32	0.7766	2.0966	646	56	2016-08-29
183	3	20.8	21.2	5.6	3.53	1.1648	0.73424	1.89904	638	57	2016-08-30
183	3	20.8	20.6667	5.68	3.53	1.18144	0.73424	1.91568	637	58	2016-08-31
183	3	20.4	20.3333	6.4	3.53	1.3056	0.72012	2.02572	644	59	2016-09-01
183	3	19.8	20.1667	6.09	3.55	1.20582	0.7029	1.90872	649	60	2016-09-02
183	3	20.3	20.0333	6.1	3.5	1.2383	0.7105	1.9488	643	61	2016-09-03
183	3	20	20.0333	6.23	3.46	1.246	0.692	1.938	639	62	2016-09-04
183	3	19.8	19.7	6.12	3.48	1.21176	0.68904	1.9008	645	63	2016-09-05
183	3	19.3	19.5667	5.9	3.41	1.1387	0.65813	1.79683	640	64	2016-09-06
183	3	19.6	19.3333	5.98	3.41	1.17208	0.66836	1.84044	627	65	2016-09-07
183	3	19.1	19.6	6.41	3.49	1.22431	0.66659	1.8909	624	66	2016-09-08
183	3	20.1	19.8667	5.78	3.32	1.16178	0.66732	1.8291	642	67	2016-09-09
183	3	20.4	20.2667	5.56	3.3	1.13424	0.6732	1.80744	642	68	2016-09-10
183	3	20.3	20.4	6.01	3.43	1.22003	0.69629	1.91632	637	69	2016-09-11
183	3	20.5	20.3667	6.01	3.43	1.23205	0.70315	1.9352	646	70	2016-09-12
183	3	20.3	20.4	6.04	3.46	1.22612	0.70238	1.9285	637	71	2016-09-13
183	3	20.4	20.4	5.95	3.46	1.2138	0.70584	1.91964	643	72	2016-09-14
183	3	20.5	20.4333	5.84	3.43	1.1972	0.70315	1.90035	638	73	2016-09-15
183	3	20.4	20.6667	5.92	3.43	1.20768	0.69972	1.9074	645	74	2016-09-16
183	3	21.1	20.3667	5.8	3.43	1.2238	0.72373	1.94753	642	75	2016-09-17
183	3	19.6	20.5333	5.82	3.42	1.14072	0.67032	1.81104	642	76	2016-09-18
183	3	20.9	20.1	5.59	3.37	1.16831	0.70433	1.87264	643	77	2016-09-19
183	3	19.8	20.2	5.51	3.38	1.09098	0.66924	1.76022	624	78	2016-09-20
183	3	19.9	19.5667	5.78	3.39	1.15022	0.67461	1.82483	637	79	2016-09-21
183	3	19	19.6	5.8	3.37	1.102	0.6403	1.7423	642	80	2016-09-22
183	3	19.9	19.7667	5.5	3.29	1.0945	0.65471	1.74921	645	81	2016-09-23
183	3	20.4	20.0333	5.84	3.38	1.19136	0.68952	1.88088	647	82	2016-09-24
183	3	19.8	19.9	5.78	3.39	1.14444	0.67122	1.81566	637	83	2016-09-25
183	3	19.5	19.7667	5.27	3.36	1.02765	0.6552	1.68285	635	84	2016-09-26
183	3	20	19.8333	5.37	3.33	1.074	0.666	1.74	636	85	2016-09-27
183	3	20	20.0667	5.69	3.31	1.138	0.662	1.8	649	86	2016-09-28
183	3	20.2	19.9	5.49	3.3	1.10898	0.6666	1.77558	645	87	2016-09-29
183	3	19.5	19.6333	5.59	3.3	1.09005	0.6435	1.73355	641	88	2016-09-30
183	3	19.2	19.7333	5.7	3.33	1.0944	0.63936	1.73376	637	89	2016-10-01
183	3	20.5	20	5.42	3.3	1.1111	0.6765	1.7876	637	90	2016-10-02
183	3	20.3	20.5	5.74	3.29	1.16522	0.66787	1.83309	648	91	2016-10-03
183	3	20.7	20.4	5.81	3.26	1.20267	0.67482	1.87749	655	92	2016-10-04
183	3	20.2	20.6	5.91	3.27	1.19382	0.66054	1.85436	643	93	2016-10-05
183	3	20.9	20.3333	5.5	3.25	1.1495	0.67925	1.82875	619	94	2016-10-06
183	3	19.9	20.3667	5.34	3.25	1.06266	0.64675	1.70941	637	95	2016-10-07
183	3	20.3	19.9667	5.71	3.28	1.15913	0.66584	1.82497	648	96	2016-10-08
183	3	19.7	19.9	5.52	3.28	1.08744	0.64616	1.7336	622	97	2016-10-09
183	3	19.7	19.5333	5.66	3.3	1.11502	0.6501	1.76512	637	98	2016-10-10
183	3	19.2	18.7333	5.97	3.33	1.14624	0.63936	1.7856	622	99	2016-10-11
183	3	17.3	18.9667	5.82	3.36	1.00686	0.58128	1.58814	634	100	2016-10-12
183	3	20.4	19.1333	5.81	3.28	1.18524	0.66912	1.85436	644	101	2016-10-13
183	3	19.7	20	5.56	3.25	1.09532	0.64025	1.73557	641	102	2016-10-14
183	3	19.9	19.7333	5.49	3.23	1.09251	0.64277	1.73528	651	103	2016-10-15
183	3	19.6	19.2667	5.56	3.23	1.08976	0.63308	1.72284	643	104	2016-10-16
183	3	18.3	18.7333	5.66	3.23	1.03578	0.59109	1.62687	635	105	2016-10-17
183	3	18.3	18.8	5.82	3.24	1.06506	0.59292	1.65798	640	106	2016-10-18
183	3	19.8	19.3333	5.58	3.19	1.10484	0.63162	1.73646	643	107	2016-10-19
183	3	19.9	20.0333	5.15	3.07	1.02485	0.61093	1.63578	637	108	2016-10-20
183	3	20.4	20.1	4.63	2.9	0.94452	0.5916	1.53612	638	109	2016-10-21
183	3	20	20.4	4.47	2.86	0.894	0.572	1.466	646	110	2016-10-22
183	3	20.8	20.5667	4.47	2.84	0.92976	0.59072	1.52048	644	111	2016-10-23
183	3	20.9	20.7	4.67	2.89	0.97603	0.60401	1.58004	625	112	2016-10-24
183	3	20.4	20.6667	4.55	2.89	0.9282	0.58956	1.51776	638	113	2016-10-25
183	3	20.7	20.7333	4.56	2.9	0.94392	0.6003	1.54422	638	114	2016-10-26
183	3	21.1	21	4.78	2.95	1.00858	0.62245	1.63103	630	115	2016-10-27
183	3	21.2	21.2333	4.71	2.94	0.99852	0.62328	1.6218	641	116	2016-10-28
183	3	21.4	21.2667	4.66	2.97	0.99724	0.63558	1.63282	639	117	2016-10-29
183	3	21.2	21	5.05	3.05	1.0706	0.6466	1.7172	632	118	2016-10-30
183	3	20.4	21.0333	4.93	3.05	1.00572	0.6222	1.62792	636	119	2016-10-31
183	3	21.5	20.7333	4.62	3	0.9933	0.645	1.6383	642	120	2016-11-01
183	3	20.3	20.1	4.77	3	0.96831	0.609	1.57731	635	121	2016-11-02
183	3	18.5	20.4	4.39	2.93	0.81215	0.54205	1.3542	646	122	2016-11-03
183	3	22.4	20.3	4.47	2.99	1.00128	0.66976	1.67104	645	123	2016-11-04
183	3	20	20.4667	4.64	3.04	0.928	0.608	1.536	635	124	2016-11-05
183	3	19	19.4667	4.69	3.05	0.8911	0.5795	1.4706	653	125	2016-11-06
183	3	19.4	19.0333	4.9	3.05	0.9506	0.5917	1.5423	653	126	2016-11-07
183	3	18.7	18.6333	4.97	3.08	0.92939	0.57596	1.50535	644	127	2016-11-08
183	3	17.8	18.5333	5.06	3.08	0.90068	0.54824	1.44892	642	128	2016-11-09
183	3	19.1	18.3333	5.16	3.08	0.98556	0.58828	1.57384	647	129	2016-11-10
183	3	18.1	18.4333	4.94	3.06	0.89414	0.55386	1.448	649	130	2016-11-11
183	3	18.1	18.0667	4.84	3.04	0.87604	0.55024	1.42628	642	131	2016-11-12
183	3	18	17.9	5.12	3.07	0.9216	0.5526	1.4742	644	132	2016-11-13
183	3	17.6	17.7	5	3.09	0.88	0.54384	1.42384	646	133	2016-11-14
183	3	17.5	17.4333	5.04	3.1	0.882	0.5425	1.4245	634	134	2016-11-15
183	3	17.2	17.6667	5.17	3.18	0.88924	0.54696	1.4362	654	135	2016-11-16
183	3	18.3	17.5667	5.24	3.26	0.95892	0.59658	1.5555	625	136	2016-11-17
183	3	17.2	17.6667	5.14	3.21	0.88408	0.55212	1.4362	642	137	2016-11-18
183	3	17.5	17.2333	5.21	3.25	0.91175	0.56875	1.4805	655	138	2016-11-19
183	3	17	17.3	5.25	3.31	0.8925	0.5627	1.4552	642	139	2016-11-20
183	3	17.4	16.8	5.14	3.21	0.89436	0.55854	1.4529	664	140	2016-11-21
183	3	16	16.8333	5.28	3.23	0.8448	0.5168	1.3616	650	141	2016-11-22
183	3	17.1	16.4333	5.77	3.36	0.98667	0.57456	1.56123	660	142	2016-11-23
183	3	16.2	16.2333	5.34	3.33	0.86508	0.53946	1.40454	657	143	2016-11-24
183	3	15.4	15.5333	5.17	3.3	0.79618	0.5082	1.30438	654	144	2016-11-25
183	3	15	15.2667	4.99	3.21	0.7485	0.4815	1.23	644	145	2016-11-26
183	3	15.4	15.3	4.89	3.19	0.75306	0.49126	1.24432	640	146	2016-11-27
183	3	15.5	15.1333	5	3.22	0.775	0.4991	1.2741	649	147	2016-11-28
183	3	14.5	14.8667	5.19	3.27	0.75255	0.47415	1.2267	663	148	2016-11-29
183	3	14.6	14.5333	5.61	3.34	0.81906	0.48764	1.3067	658	149	2016-11-30
183	3	14.5	14.5333			0	0	0	665	150	2016-12-01
183	3	14.5	14.6333	5.96	3.46	0.8642	0.5017	1.3659	658	151	2016-12-02
183	3	14.9	14.2	5.48	3.39	0.81652	0.50511	1.32163	655	152	2016-12-03
183	3	13.2	13.7667	5.08	3.42	0.67056	0.45144	1.122	669	153	2016-12-04
183	3	13.2	13.4	5.41	3.45	0.71412	0.4554	1.16952	651	154	2016-12-05
183	3	13.8	13.5333	5.76	3.5	0.79488	0.483	1.27788	655	155	2016-12-06
183	3	13.6	13.5	5.93	3.49	0.80648	0.47464	1.28112	667	156	2016-12-07
183	3	13.1	13.2	5.48	3.4	0.71788	0.4454	1.16328	664	157	2016-12-08
183	3	12.9	13.2	5.61	3.36	0.72369	0.43344	1.15713	663	158	2016-12-09
183	3	13.6	13.3333	5.9	3.45	0.8024	0.4692	1.2716	661	159	2016-12-10
183	3	13.5	13.5333	5.65	3.48	0.76275	0.4698	1.23255	659	160	2016-12-11
183	3	13.5	13.3667	5.47	3.47	0.73845	0.46845	1.2069	665	161	2016-12-12
183	3	13.1	12.9667	5.59	3.46	0.73229	0.45326	1.18555	669	162	2016-12-13
183	3	12.3	12.4	5.25	3.39	0.64575	0.41697	1.06272	672	163	2016-12-14
183	3	11.8	12	5.34	3.34	0.63012	0.39412	1.02424	675	164	2016-12-15
183	3	11.9	11.8	5.28	3.31	0.62832	0.39389	1.02221	673	165	2016-12-16
183	3	11.7	11.7333	5.29	3.33	0.61893	0.38961	1.00854	657	166	2016-12-17
183	3	11.6	11.9667	5.34	3.36	0.61944	0.38976	1.0092	665	167	2016-12-18
183	3	12.6	12.1333	5.38	3.36	0.67788	0.42336	1.10124	666	168	2016-12-19
183	3	12.2	12.1333	5.24	3.3	0.63928	0.4026	1.04188	671	169	2016-12-20
183	3	11.6	11.7	5.42	3.32	0.62872	0.38512	1.01384	664	170	2016-12-21
183	3	11.3	11.6667	5.36	3.35	0.60568	0.37855	0.98423	659	171	2016-12-22
183	3	12.1	11.7333	5.38	3.36	0.65098	0.40656	1.05754	672	172	2016-12-23
183	3	11.8	12.1333	5.1	3.29	0.6018	0.38822	0.99002	670	173	2016-12-24
183	3	12.5	12.0333	5.1	3.29	0.6375	0.41125	1.04875	670	174	2016-12-25
183	3	11.8	11.8	5.26	3.37	0.62068	0.39766	1.01834	680	175	2016-12-26
183	3	11.1	11.3333	5.43	3.4	0.60273	0.3774	0.98013	664	176	2016-12-27
183	3	11.1	11.1	5.32	3.37	0.59052	0.37407	0.96459	670	177	2016-12-28
183	3	11.1	10.5667	5.19	3.33	0.57609	0.36963	0.94572	681	178	2016-12-29
183	3	9.5	10.1333	5.12	3.31	0.4864	0.31445	0.80085	689	179	2016-12-30
183	3	9.8	9.6	5.34	3.33	0.52332	0.32634	0.84966	667	180	2016-12-31
183	3	9.5	9.83333	5.38	3.35	0.5111	0.31825	0.82935	679	181	2017-01-01
183	3	10.2	9.6	5.6	3.39	0.5712	0.34578	0.91698	678	182	2017-01-02
183	3	9.1	9	5.57	3.39	0.50687	0.30849	0.81536	688	183	2017-01-03
183	3	7.7	8.33333	5.83	3.39	0.44891	0.26103	0.70994	683	184	2017-01-04
183	3	8.2	7.8	5.81	3.38	0.47642	0.27716	0.75358	678	185	2017-01-05
183	3	7.5	8.1	5.74	3.3	0.4305	0.2475	0.678	690	186	2017-01-06
183	3	8.6	8	5.62	3.27	0.48332	0.28122	0.76454	685	187	2017-01-07
183	3	7.9	7.96667	5.66	3.24	0.44714	0.25596	0.7031	686	188	2017-01-08
183	3	7.4	7.36667	5.79	3.28	0.42846	0.24272	0.67118	678	189	2017-01-09
183	3	6.8	6.66667	5.78	3.29	0.39304	0.22372	0.61676	691	190	2017-01-10
183	3	5.8	6.13333	6.08	3.32	0.35264	0.19256	0.5452	680	191	2017-01-11
183	3	5.8	5.8	6.13	3.32	0.35554	0.19256	0.5481	618	192	2017-01-12
247	2	9.9	13.05	5.31	5.21	0.52569	0.51579	1.04148		-31	2016-04-01
247	2	16.2	12.7	6.81	5.18	1.10322	0.83916	1.94238	399	-30	2016-04-02
247	2	12	13.7333	7.63	5.08	0.9156	0.6096	1.5252	400	-29	2016-04-03
247	2	13	13.2667	7.44	4.97	0.9672	0.6461	1.6133	398	-28	2016-04-04
247	2	14.8	14.1333	7.17	4.73	1.06116	0.70004	1.7612	401	-27	2016-04-05
247	2	14.6	15.4333	5.78	4.29	0.84388	0.62634	1.47022	401	-26	2016-04-06
247	2	16.9	16.0667	5.53	4.1	0.93457	0.6929	1.62747	403	-25	2016-04-07
247	2	16.7	16.7	5.07	4.12	0.84669	0.68804	1.53473	393	-24	2016-04-08
247	2	16.5	16.7333	4.68	4.04	0.7722	0.6666	1.4388	398	-23	2016-04-09
247	2	17	17.0333	4.97	3.96	0.8449	0.6732	1.5181	433	-22	2016-04-10
247	2	17.6	17.2667	4.72	4	0.83072	0.704	1.53472	399	-21	2016-04-11
247	2	17.2	17.5667	4.26	3.93	0.73272	0.67596	1.40868	413	-20	2016-04-12
247	2	17.9	17.4667	4.27	3.86	0.76433	0.69094	1.45527	467	-19	2016-04-13
247	2	17.3	17.3667	4	3.89	0.692	0.67297	1.36497	411	-18	2016-04-14
247	2	16.9	17.2667	4.07	3.89	0.68783	0.65741	1.34524	411	-17	2016-04-15
247	2	17.6	17.7	4.13	3.78	0.72688	0.66528	1.39216	412	-16	2016-04-16
247	2	18.6	18.7333	4.08	3.71	0.75888	0.69006	1.44894	409	-15	2016-04-17
247	2	20	19.4333	4.07	3.73	0.814	0.746	1.56	403	-14	2016-04-18
247	2	19.7	19.5667	4.2	3.78	0.8274	0.74466	1.57206	410	-13	2016-04-19
247	2	19	19.0667	4.22	3.81	0.8018	0.7239	1.5257	405	-12	2016-04-20
247	2	18.5	18.9667	4.53	3.77	0.83805	0.69745	1.5355	426	-11	2016-04-21
247	2	19.4	18.7	4.61	3.75	0.89434	0.7275	1.62184	410	-10	2016-04-22
247	2	18.2	18.6667	4.31	3.74	0.78442	0.68068	1.4651	411	-9	2016-04-23
247	2	18.4	18.3333	4.15	3.72	0.7636	0.68448	1.44808	413	-8	2016-04-24
247	2	18.4	18.5333	4.17	3.64	0.76728	0.66976	1.43704	413	-7	2016-04-25
247	2	18.8	18.4333	4.01	3.57	0.75388	0.67116	1.42504	402	-6	2016-04-26
247	2	18.1	17.9	4.05	3.51	0.73305	0.63531	1.36836	415	-5	2016-04-27
247	2	16.8	17.6333	4.27	3.5	0.71736	0.588	1.30536	417	-4	2016-04-28
247	2	18	18.0667	4.32	3.49	0.7776	0.6282	1.4058	410	-3	2016-04-29
247	2	19.4	19.0667	4.41	3.57	0.85554	0.69258	1.54812	412	-2	2016-04-30
247	2	19.8	19.7333	4.31	3.6	0.85338	0.7128	1.56618	410	-1	2016-05-01
247	2	20	20.0333	4.24	3.67	0.848	0.734	1.582	419	0	2016-05-02
247	2	20.3	19.7667	4.38	3.71	0.88914	0.75313	1.64227	493	1	2016-05-03
247	2	19	19.5	4.31	3.74	0.8189	0.7106	1.5295	431	2	2016-05-04
247	2	19.2	19.4333	4.58	3.67	0.87936	0.70464	1.584	427	3	2016-05-05
247	2	20.1	19.3333	4.52	3.63	0.90852	0.72963	1.63815	422	4	2016-05-06
247	2	18.7	19	4.43	3.7	0.82841	0.6919	1.52031	425	5	2016-05-07
247	2	18.2	18.5333	4.36	3.74	0.79352	0.68068	1.4742	430	6	2016-05-08
247	2	18.7	18.8	4.14	3.72	0.77418	0.69564	1.46982	425	7	2016-05-09
247	2	19.5	18.8333	3.94	3.69	0.7683	0.71955	1.48785	414	8	2016-05-10
247	2	18.3	19	4.32	3.68	0.79056	0.67344	1.464	427	9	2016-05-11
247	2	19.2	18.9	4.37	3.61	0.83904	0.69312	1.53216	434	10	2016-05-12
247	2	19.2	19.1667	4.19	3.61	0.80448	0.69312	1.4976	433	11	2016-05-13
247	2	19.1	19.2333	4.15	3.66	0.79265	0.69906	1.49171	429	12	2016-05-14
247	2	19.4	19.0333	3.88	3.69	0.75272	0.71586	1.46858	425	13	2016-05-15
247	2	18.6	18.4	4.14	3.69	0.77004	0.68634	1.45638	419	14	2016-05-16
247	2	17.2	18.2	4.18	3.64	0.71896	0.62608	1.34504	420	15	2016-05-17
247	2	18.8	18.2667	4.09	3.7	0.76892	0.6956	1.46452	428	16	2016-05-18
247	2	18.8	18.8333	4.14	3.72	0.77832	0.69936	1.47768	431	17	2016-05-19
247	2	18.9	19.4	4.18	3.71	0.79002	0.70119	1.49121	426	18	2016-05-20
247	2	20.5	19.8333	4.23	3.67	0.86715	0.75235	1.6195	437	19	2016-05-21
247	2	20.1	19.8333	4.04	3.63	0.81204	0.72963	1.54167	425	20	2016-05-22
247	2	18.9	19.4333	3.98	3.73	0.75222	0.70497	1.45719	432	21	2016-05-23
247	2	19.3	19.4	3.94	3.77	0.76042	0.72761	1.48803	423	22	2016-05-24
247	2	20	19.8	3.77	3.72	0.754	0.744	1.498	430	23	2016-05-25
247	2	20.1	19.6333	3.83	3.75	0.76983	0.75375	1.52358	428	24	2016-05-26
247	2	18.8	19.9333	4.04	3.8	0.75952	0.7144	1.47392	429	25	2016-05-27
247	2	20.9	19.8667	3.83	3.76	0.80047	0.78584	1.58631	429	26	2016-05-28
247	2	19.9	19.9	3.92	3.74	0.78008	0.74426	1.52434	430	27	2016-05-29
247	2	18.9	19.5333	3.99	3.73	0.75411	0.70497	1.45908	432	28	2016-05-30
247	2	19.8	19.3667	4.12	3.7	0.81576	0.7326	1.54836	438	29	2016-05-31
247	2	19.4	19.6667	4.32	3.71	0.83808	0.71974	1.55782	484	30	2016-06-01
247	2	19.8	19.4	4.16	3.72	0.82368	0.73656	1.56024	436	31	2016-06-02
247	2	19	19.1333	3.85	3.74	0.7315	0.7106	1.4421	435	32	2016-06-03
247	2	18.6	18.9667	3.78	3.76	0.70308	0.69936	1.40244	434	33	2016-06-04
247	2	19.3	19.2333	3.85	3.74	0.74305	0.72182	1.46487	433	34	2016-06-05
247	2	19.8	19.0333	3.97	3.74	0.78606	0.74052	1.52658	415	35	2016-06-06
247	2	18	18.9667	4.04	3.73	0.7272	0.6714	1.3986	430	36	2016-06-07
247	2	19.1	18.6333	3.84	3.75	0.73344	0.71625	1.44969	434	37	2016-06-08
247	2	18.8	18.4	3.97	3.79	0.74636	0.71252	1.45888	435	38	2016-06-09
247	2	17.3	17.7	3.96	3.8	0.68508	0.6574	1.34248	436	39	2016-06-10
247	2	17	17.2667	4.28	3.8	0.7276	0.646	1.3736	438	40	2016-06-11
247	2	17.5	17.8	4.6	3.7	0.805	0.6475	1.4525	438	41	2016-06-12
247	2	18.9	18.4	4.74	3.67	0.89586	0.69363	1.58949	438	42	2016-06-13
247	2	18.8	18.7333	4.25	3.74	0.799	0.70312	1.50212	438	43	2016-06-14
247	2	18.5	18.4	4.19	3.8	0.77515	0.703	1.47815	444	44	2016-06-15
247	2	17.9	18	4.02	3.73	0.71958	0.66767	1.38725	435	45	2016-06-16
247	2	17.6	17.8333	4.14	3.66	0.72864	0.64416	1.3728	438	46	2016-06-17
247	2	18	17.9333	4.19	3.64	0.7542	0.6552	1.4094	438	47	2016-06-18
247	2	18.2	18.1667	3.96	3.63	0.72072	0.66066	1.38138	440	48	2016-06-19
247	2	18.3	17.5667	3.84	3.61	0.70272	0.66063	1.36335	434	49	2016-06-20
247	2	16.2	17.3333	3.72	3.64	0.60264	0.58968	1.19232	438	50	2016-06-21
247	2	17.5	17.8333	3.73	3.61	0.65275	0.63175	1.2845	434	51	2016-06-22
247	2	19.8	18.7	3.81	3.54	0.75438	0.70092	1.4553	440	52	2016-06-23
247	2	18.8	18.9333	3.97	3.5	0.74636	0.658	1.40436	433	53	2016-06-24
247	2	18.2	18.4	3.91	3.54	0.71162	0.64428	1.3559	426	54	2016-06-25
247	2	18.2	18.6333	3.97	3.57	0.72254	0.64974	1.37228	424	55	2016-06-26
247	2	19.5	18.8	3.89	3.62	0.75855	0.7059	1.46445	431	56	2016-06-27
247	2	18.7	18.9	3.94	3.62	0.73678	0.67694	1.41372	428	57	2016-06-28
247	2	18.5	18.4333	3.95	3.64	0.73075	0.6734	1.40415	427	58	2016-06-29
247	2	18.1	16.9	3.88	3.62	0.70228	0.65522	1.3575	427	59	2016-06-30
247	2	14.1	15	3.86	3.63	0.54426	0.51183	1.05609	394	60	2016-07-01
247	2	12.8	13.7	4.21	3.57	0.53888	0.45696	0.99584	405	61	2016-07-02
247	2	14.2	14.2333	4.84	3.41	0.68728	0.48422	1.1715	388	62	2016-07-03
247	2	15.7	15.5	5.25	3.29	0.82425	0.51653	1.34078	395	63	2016-07-04
247	2	16.6	16.3333	4.94	3.31	0.82004	0.54946	1.3695	402	64	2016-07-05
247	2	16.7	17.2	4.79	3.38	0.79993	0.56446	1.36439	493	65	2016-07-06
247	2	18.3	17.3333	4.67	3.43	0.85461	0.62769	1.4823	408	66	2016-07-07
247	2	17	17.5	4.34	3.5	0.7378	0.595	1.3328	411	67	2016-07-08
247	2	17.2	17.3667	4.18	3.54	0.71896	0.60888	1.32784	412	68	2016-07-09
247	2	17.9	17.5	4.11	3.62	0.73569	0.64798	1.38367	410	69	2016-07-10
247	2	17.4	17.7667	3.99	3.64	0.69426	0.63336	1.32762	421	70	2016-07-11
247	2	18	17.8333	4.07	3.64	0.7326	0.6552	1.3878	433	71	2016-07-12
247	2	18.1	18	4.09	3.61	0.74029	0.65341	1.3937	423	72	2016-07-13
247	2	17.9	18.0333	4.44	3.62	0.79476	0.64798	1.44274	428	73	2016-07-14
247	2	18.1	17.9333	4.63	3.63	0.83803	0.65703	1.49506	425	74	2016-07-15
247	2	17.8	18.1	4.24	3.66	0.75472	0.65148	1.4062	428	75	2016-07-16
247	2	18.4	17.8667	4.26	3.68	0.78384	0.67712	1.46096	429	76	2016-07-17
247	2	17.4	17.7333	4.05	3.7	0.7047	0.6438	1.3485	428	77	2016-07-18
247	2	17.4	17.2	4.06	3.71	0.70644	0.64554	1.35198	419	78	2016-07-19
247	2	16.8	17.1667	4.04	3.69	0.67872	0.61992	1.29864	446	79	2016-07-20
247	2	17.3	17.2333	4.05	3.66	0.70065	0.63318	1.33383	430	80	2016-07-21
247	2	17.6	17.2333	3.81	3.66	0.67056	0.64416	1.31472	435	81	2016-07-22
247	2	16.8	17.3667	3.75	3.68	0.63	0.61824	1.24824	500	82	2016-07-23
247	2	17.7	17.7	3.98	3.66	0.70446	0.64782	1.35228	458	83	2016-07-24
247	2	18.6	18.1333	4.09	3.62	0.76074	0.67332	1.43406	430	84	2016-07-25
247	2	18.1	17.9	3.92	3.64	0.70952	0.65884	1.36836	434	85	2016-07-26
247	2	17	17.6	3.77	3.68	0.6409	0.6256	1.2665	446	86	2016-07-27
247	2	17.7	17.4	3.77	3.69	0.66729	0.65313	1.32042	446	87	2016-07-28
247	2	17.5	17.7	3.65	3.74	0.63875	0.6545	1.29325	434	88	2016-07-29
247	2	17.9	17.9667	3.68	3.8	0.65872	0.6802	1.33892	432	89	2016-07-30
247	2	18.5	18.0667	4.11	3.86	0.76035	0.7141	1.47445	436	90	2016-07-31
247	2	17.8	18.1	4.22	3.9	0.75116	0.6942	1.44536	475	91	2016-08-01
247	2	18	17.9667	4.38	3.9	0.7884	0.702	1.4904	437	92	2016-08-02
247	2	18.1	17.5333	4.41	3.92	0.79821	0.70952	1.50773	433	93	2016-08-03
247	2	16.5	16.9333	4.46	3.97	0.7359	0.65505	1.39095	444	94	2016-08-04
247	2	16.2	16.3	4.53	3.96	0.73386	0.64152	1.37538	434	95	2016-08-05
247	2	16.2	16.4667	4.7	3.86	0.7614	0.62532	1.38672	433	96	2016-08-06
247	2	17	16.8667	4.69	3.81	0.7973	0.6477	1.445	432	97	2016-08-07
247	2	17.4	16.8667	4.96	3.83	0.86304	0.66642	1.52946	426	98	2016-08-08
247	2	16.2	16.7333	5.17	3.87	0.83754	0.62694	1.46448	426	99	2016-08-09
247	2	16.6	16.4667	4.79	3.86	0.79514	0.64076	1.4359	439	100	2016-08-10
247	2	16.6	16.6	4.42	3.89	0.73372	0.64574	1.37946	445	101	2016-08-11
247	2	16.6	16.8	4.39	3.88	0.72874	0.64408	1.37282	437	102	2016-08-12
247	2	17.2	16.9333	4.7	3.86	0.8084	0.66392	1.47232	526	103	2016-08-13
247	2	17	16.9	4.42	3.84	0.7514	0.6528	1.4042	441	104	2016-08-14
247	2	16.5	17.1667	4.1	3.82	0.6765	0.6303	1.3068	439	105	2016-08-15
247	2	18	16.6333	4.24	3.81	0.7632	0.6858	1.449	447	106	2016-08-16
247	2	15.4	16.4	3.96	3.83	0.60984	0.58982	1.19966	504	107	2016-08-17
247	2	15.8	15.6667	3.75	3.77	0.5925	0.59566	1.18816	441	108	2016-08-18
247	2	15.8	16.2333	3.19	3.79	0.50402	0.59882	1.10284	452	109	2016-08-19
247	2	17.1	16.3	3.38	3.75	0.57798	0.64125	1.21923	436	110	2016-08-20
247	2	16	16.5667	3.35	3.74	0.536	0.5984	1.1344	441	111	2016-08-21
247	2	16.6	16.6	3.67	3.67	0.60922	0.60922	1.21844	445	112	2016-08-22
247	2	17.2	16.8	3.3	3.62	0.5676	0.62264	1.19024	446	113	2016-08-23
247	2	16.6	16.9667	3.01	3.69	0.49966	0.61254	1.1122	488	114	2016-08-24
247	2	17.1	16.7667	3.03	3.7	0.51813	0.6327	1.15083	443	115	2016-08-25
247	2	16.6	16.8	3.62	3.69	0.60092	0.61254	1.21346	440	116	2016-08-26
247	2	16.7	16.6	3.62	3.69	0.60454	0.61623	1.22077	442	117	2016-08-27
247	2	16.5	16.7	3.34	3.71	0.5511	0.61215	1.16325	441	118	2016-08-28
247	2	16.9	16.8333	3.39	3.7	0.57291	0.6253	1.19821	443	119	2016-08-29
247	2	17.1	16.9667	3.7	3.67	0.6327	0.62757	1.26027	440	120	2016-08-30
247	2	16.9	16.9333	3.74	3.62	0.63206	0.61178	1.24384	437	121	2016-08-31
247	2	16.8	17.0333	3.85	3.55	0.6468	0.5964	1.2432	440	122	2016-09-01
247	2	17.4	18.5667	3.91	3.41	0.68034	0.59334	1.27368	445	123	2016-09-02
247	2	21.5	18.8	3.85	3.32	0.82775	0.7138	1.54155	437	124	2016-09-03
247	2	17.5	18.8	3.55	3.27	0.62125	0.57225	1.1935	444	125	2016-09-04
247	2	17.4	17.3667	3.5	3.28	0.609	0.57072	1.17972	438	126	2016-09-05
247	2	17.2	17.1333	3.49	3.27	0.60028	0.56244	1.16272	442	127	2016-09-06
247	2	16.8	17	3.37	3.25	0.56616	0.546	1.11216	433	128	2016-09-07
247	2	17	17.1333	3.48	3.24	0.5916	0.5508	1.1424	437	129	2016-09-08
247	2	17.6	17.2667	3.51	3.14	0.61776	0.55264	1.1704	436	130	2016-09-09
247	2	17.2	17.1	3.45	3.16	0.5934	0.54352	1.13692	446	131	2016-09-10
247	2	16.5	17.0667	3.53	3.23	0.58245	0.53295	1.1154	442	132	2016-09-11
247	2	17.5	16.9667	3.57	3.2	0.62475	0.56	1.18475	443	133	2016-09-12
247	2	16.9	16.9	3.57	3.17	0.60333	0.53573	1.13906	439	134	2016-09-13
247	2	16.3	16.5667	3.42	3.16	0.55746	0.51508	1.07254	439	135	2016-09-14
247	2	16.5	16.7	3.59	3.18	0.59235	0.5247	1.11705	466	136	2016-09-15
247	2	17.3	17.1333	3.7	3.18	0.6401	0.55014	1.19024	439	137	2016-09-16
247	2	17.6	17.5	3.76	3.14	0.66176	0.55264	1.2144	444	138	2016-09-17
247	2	17.6	17.8667	3.58	3.15	0.63008	0.5544	1.18448	442	139	2016-09-18
247	2	18.4	17.8333	3.4	3.19	0.6256	0.58696	1.21256	444	140	2016-09-19
247	2	17.5	17.9	3.15	3.18	0.55125	0.5565	1.10775	441	141	2016-09-20
247	2	17.8	17.7333	3.23	3.14	0.57494	0.55892	1.13386	443	142	2016-09-21
247	2	17.9	17.9333	3.53	3.11	0.63187	0.55669	1.18856	451	143	2016-09-22
247	2	18.1	17.4667	3.62	3.14	0.65522	0.56834	1.22356	451	144	2016-09-23
247	2	16.4	16.7	3.47	3.17	0.56908	0.51988	1.08896	442	145	2016-09-24
247	2	15.6	16.4333	3.31	3.16	0.51636	0.49296	1.00932	448	146	2016-09-25
247	2	17.3	16.6667	3.33	3.12	0.57609	0.53976	1.11585	449	147	2016-09-26
247	2	17.1	17.3	3.39	3.06	0.57969	0.52326	1.10295	451	148	2016-09-27
247	2	17.5	17.4	3.56	3.05	0.623	0.53375	1.15675	450	149	2016-09-28
247	2	17.6	17.6333	3.75	3.08	0.66	0.54208	1.20208	444	150	2016-09-29
247	2	17.8	17.6667	3.64	3.07	0.64792	0.54646	1.19438	448	151	2016-09-30
247	2	17.6	17.7	3.47	3.07	0.61072	0.54032	1.15104	448	152	2016-10-01
247	2	17.7	17.6333	3.34	3.05	0.59118	0.53985	1.13103	452	153	2016-10-02
247	2	17.6	17.8667	3.41	3.09	0.60016	0.54384	1.144	455	154	2016-10-03
247	2	18.3	17.9333	3.52	3.1	0.64416	0.5673	1.21146	446	155	2016-10-04
247	2	17.9	18.3	3.2	3.02	0.5728	0.54058	1.11338	447	156	2016-10-05
247	2	18.7	18.2333	3.22	3.05	0.60214	0.57035	1.17249	451	157	2016-10-06
247	2	18.1	18.0667	3.07	3.07	0.55567	0.55567	1.11134	455	158	2016-10-07
247	2	17.4	17.3333	3	3.08	0.522	0.53592	1.05792	449	159	2016-10-08
247	2	16.5	16.7667	3.46	3.18	0.5709	0.5247	1.0956	449	160	2016-10-09
247	2	16.4	16.5	3.68	3.2	0.60352	0.5248	1.12832	445	161	2016-10-10
247	2	16.6	16.3667	3.88	3.2	0.64408	0.5312	1.17528	441	162	2016-10-11
247	2	16.1	16.0333	3.93	3.22	0.63273	0.51842	1.15115	483	163	2016-10-12
247	2	15.4	16.0333	3.86	3.25	0.59444	0.5005	1.09494	445	164	2016-10-13
247	2	16.6	15.7667	3.85	3.22	0.6391	0.53452	1.17362	455	165	2016-10-14
247	2	15.3	15.9667	3.91	3.2	0.59823	0.4896	1.08783	444	166	2016-10-15
247	2	16	15.7	3.77	3.13	0.6032	0.5008	1.104	449	167	2016-10-16
247	2	15.8	15.7667	3.6	3.11	0.5688	0.49138	1.06018	463	168	2016-10-17
247	2	15.5	15.9667	3.5	3.12	0.5425	0.4836	1.0261	447	169	2016-10-18
247	2	16.6	16.2667	3.63	3.1	0.60258	0.5146	1.11718	450	170	2016-10-19
247	2	16.7	16.6	3.65	3.1	0.60955	0.5177	1.12725	451	171	2016-10-20
247	2	16.5	16.5333	3.52	3.1	0.5808	0.5115	1.0923	452	172	2016-10-21
247	2	16.4	16.5333	3.35	3.12	0.5494	0.51168	1.06108	455	173	2016-10-22
247	2	16.7	16.5667	3.29	3.08	0.54943	0.51436	1.06379	460	174	2016-10-23
247	2	16.6	16.5667	3.43	3.08	0.56938	0.51128	1.08066	458	175	2016-10-24
247	2	16.4	16.1667	3.56	3.11	0.58384	0.51004	1.09388	456	176	2016-10-25
247	2	15.5	16.0333	3.55	3.13	0.55025	0.48515	1.0354	457	177	2016-10-26
247	2	16.2	16.4667	3.51	3.11	0.56862	0.50382	1.07244	457	178	2016-10-27
247	2	17.7	17.2333	3.75	3.09	0.66375	0.54693	1.21068	452	179	2016-10-28
247	2	17.8	17.6667	3.81	3.13	0.67818	0.55714	1.23532	454	180	2016-10-29
247	2	17.5	17.9333	3.7	3.18	0.6475	0.5565	1.204	462	181	2016-10-30
247	2	18.5	18	3.73	3.15	0.69005	0.58275	1.2728	455	182	2016-10-31
247	2	18	18.1667	3.64	3.15	0.6552	0.567	1.2222	453	183	2016-11-01
247	2	18	18.1333	3.55	3.19	0.639	0.5742	1.2132	449	184	2016-11-02
247	2	18.4	18.0667	3.65	3.24	0.6716	0.59616	1.26776	451	185	2016-11-03
247	2	17.8	18.0333	3.82	3.37	0.67996	0.59986	1.27982	456	186	2016-11-04
247	2	17.9	18.0333	3.88	3.44	0.69452	0.61576	1.31028	451	187	2016-11-05
247	2	18.4	18.1667	3.97	3.51	0.73048	0.64584	1.37632	465	188	2016-11-06
247	2	18.2	18.2667	4.17	3.56	0.75894	0.64792	1.40686	463	189	2016-11-07
247	2	18.2	18.3667	4.41	3.59	0.80262	0.65338	1.456	459	190	2016-11-08
247	2	18.7	18.5	4.19	3.57	0.78353	0.66759	1.45112	457	191	2016-11-09
247	2	18.6	18.5	4.01	3.61	0.74586	0.67146	1.41732	458	192	2016-11-10
247	2	18.2	18.4333	4.36	3.66	0.79352	0.66612	1.45964	456	193	2016-11-11
247	2	18.5	18.6333	4.45	3.62	0.82325	0.6697	1.49295	461	194	2016-11-12
247	2	19.2	18.9333	4.21	3.55	0.80832	0.6816	1.48992	473	195	2016-11-13
247	2	19.1	19	4.36	3.59	0.83276	0.68569	1.51845	457	196	2016-11-14
[truncated: 4,707 more rows]

## Sheet: May-June 2016
Animal Number	Parity	Day Production	Milk yield	Fat indication	Protein indication	Fat yield	Protein Yield	MS total	Weight	Days from Peak	Date		Animal Number	Parity	Day Production	Milk yield	Fat indication	Protein indication	Fat yield	Protein Yield	MS total	Weight	Days from Peak	Date		Animal Number	Parity	Day Production	Milk yield	Fat indication	Protein indication	Fat yield	Protein Yield	MS total	Weight	Days from Peak	Date		Animal Number	Parity	Day Production	Milk yield	Fat indication	Protein indication	Fat yield	Protein Yield	MS total	Weight	Days from Peak
8	5	5.7	8.45	2.36	5.78	0.13452	0.32946	0.46398		-56	2016-06-01		11	6	14.6	13.5	3.19	4.61	0.46574	0.67306	1.1388		-32	2016-06-06		27	7	6.8	9.9	4.47	5.57	0.30396	0.37876	0.68272		-43	2016-06-26		103	4	6.1	10.6	3.31	4.68	0.20191	0.28548	0.48739		-24
8	5	11.2	10.3	4.73	5.8	0.52976	0.6496	1.17936	513	-55	2016-06-02		11	6	12.4	14.5333	5.23	5.23	0.64852	0.64852	1.29704	476	-31	2016-06-07		27	7	13	12.6667	6.19	5.57	0.8047	0.7241	1.5288	465	-42	2016-06-27		103	4	15.1	13.5	6.2	5.39	0.9362	0.81389	1.75009	477	-23
8	5	14	15	6.18	5.73	0.8652	0.8022	1.6674	529	-54	2016-06-03		11	6	16.6	15.5667	7.62	5.78	1.26492	0.95948	2.2244	481	-30	2016-06-08		27	7	18.2	16.8667	6.78	5.44	1.23396	0.99008	2.22404	463	-41	2016-06-28		103	4	19.3	18.9667	7.48	5.53	1.44364	1.06729	2.51093	476	-22
8	5	19.8	18.1667	5.94	5.39	1.17612	1.06722	2.24334	542	-53	2016-06-04		11	6	17.7	17.6	6.89	5.63	1.21953	0.99651	2.21604	474	-29	2016-06-09		27	7	19.4	19.9667	6.3	5.17	1.2222	1.00298	2.22518	502	-40	2016-06-29		103	4	22.5	22.3333	6.79	5.2	1.52775	1.17	2.69775	474	-21
8	5	20.7	21.1667	5.55	5.22	1.14885	1.08054	2.22939	545	-52	2016-06-05		11	6	18.5	18.6333	6.89	5.56	1.27465	1.0286	2.30325	477	-28	2016-06-10		27	7	22.3	22.2333	5.58	4.96	1.24434	1.10608	2.35042	474	-39	2016-06-30		103	4	25.2	24.7	5.8	4.93	1.4616	1.24236	2.70396	478	-20
8	5	23	22.7333	4.64	5	1.0672	1.15	2.2172	547	-51	2016-06-06		11	6	19.7	19.5	6.32	5.39	1.24504	1.06183	2.30687	479	-27	2016-06-11		27	7	25	24.5667	5.38	4.81	1.345	1.2025	2.5475	478	-38	2016-07-01		103	4	26.4	26.3333	5.12	4.72	1.35168	1.24608	2.59776	479	-19
8	5	24.5	24.4	4.13	4.86	1.01185	1.1907	2.20255	554	-50	2016-06-07		11	6	20.3	20.4	6.07	5.24	1.23221	1.06372	2.29593	475	-26	2016-06-12		27	7	26.4	26.2667	4.96	4.67	1.30944	1.23288	2.54232	478	-37	2016-07-02		103	4	27.4	27.4333	4.8	4.5	1.3152	1.233	2.5482	481	-18
8	5	25.7	25.8	4.52	4.76	1.16164	1.22332	2.38496	566	-49	2016-06-08		11	6	21.2	21.1667	5.59	4.99	1.18508	1.05788	2.24296	471	-25	2016-06-13		27	7	27.4	27.6	5	4.57	1.37	1.25218	2.62218	520	-36	2016-07-03		103	4	28.5	28.4333	4.73	4.3	1.34805	1.2255	2.57355	485	-17
8	5	27.2	26.8	4.83	4.64	1.31376	1.26208	2.57584	556	-48	2016-06-09		11	6	22	21.6333	5.77	4.85	1.2694	1.067	2.3364	467	-24	2016-06-14		27	7	29	28.2667	5.17	4.43	1.4993	1.2847	2.784	473	-35	2016-07-04		103	4	29.4	29.0667	4.6	4.19	1.3524	1.23186	2.58426	480	-16
8	5	27.5	27.7	4.77	4.47	1.31175	1.22925	2.541	559	-47	2016-06-10		11	6	21.7	21.8	5.8	4.72	1.2586	1.02424	2.28284	464	-23	2016-06-15		27	7	28.4	28.9333	4.98	4.3	1.41432	1.2212	2.63552	479	-34	2016-07-05		103	4	29.3	29.1333	4.67	4.14	1.36831	1.21302	2.58133	480	-15
8	5	28.4	28.7	4.55	4.39	1.2922	1.24676	2.53896	552	-46	2016-06-11		11	6	21.7	21.5667	5.74	4.63	1.24558	1.00471	2.25029	467	-22	2016-06-16		27	7	29.4	27.8333	4.34	4.18	1.27596	1.22892	2.50488	473	-33	2016-07-06		103	4	28.7	29.2333	4.43	4.13	1.27141	1.18531	2.45672	486	-14
8	5	30.2	28.9	4.64	4.31	1.40128	1.30162	2.7029	557	-45	2016-06-12		11	6	21.3	21.6667	5.68	4.63	1.20984	0.98619	2.19603	472	-21	2016-06-17		27	7	25.7	25.2	4.59	4.13	1.17963	1.06141	2.24104	476	-32	2016-07-07		103	4	29.7	29.9333	4.58	4.07	1.36026	1.20879	2.56905	479	-13
8	5	28.1	29.1333	4.17	4.21	1.17177	1.18301	2.35478	545	-44	2016-06-13		11	6	22	22	5.49	4.49	1.2078	0.9878	2.1956	510	-20	2016-06-18		27	7	20.5	20.8667	4.33	4.11	0.88765	0.84255	1.7302	437	-31	2016-07-08		103	4	31.4	30.7333	4.81	3.98	1.51034	1.24972	2.76006	473	-12
8	5	29.1	28.9667	3.93	4.16	1.14363	1.21056	2.35419	566	-43	2016-06-14		11	6	22.7	22.8333	5.3	4.42	1.2031	1.00334	2.20644	461	-19	2016-06-19		27	7	16.4	16.8333	4.55	4.08	0.7462	0.66912	1.41532	432	-30	2016-07-09		103	4	31.1	30.9667	4.78	3.93	1.48658	1.22223	2.70881	492	-11
8	5	29.7	28.8667	4.1	4.1	1.2177	1.2177	2.4354	550	-42	2016-06-15		11	6	23.8	22.3	5.15	4.39	1.2257	1.04482	2.27052	464	-18	2016-06-20		27	7	13.6	15.5333	4.54	3.72	0.61744	0.50592	1.12336	442	-29	2016-07-10		103	4	30.4	30.6667	4.66	3.94	1.41664	1.19776	2.6144	479	-10
8	5	27.8	28.3333	4.27	4.03	1.18706	1.12034	2.3074	563	-41	2016-06-16		11	6	20.4	23.3	4.97	4.37	1.01388	0.89148	1.90536	464	-17	2016-06-21		27	7	16.6	17.3	5.17	3.38	0.85822	0.56108	1.4193	443	-28	2016-07-11		103	4	30.5	30.3667	4.76	3.95	1.4518	1.20475	2.65655	483	-9
8	5	27.5	28.4667	4.34	3.95	1.1935	1.08625	2.27975	576	-40	2016-06-17		11	6	25.7	23.0333	5.19	4.37	1.33383	1.12309	2.45692	465	-16	2016-06-22		27	7	21.7	20.7333	4.66	3.12	1.01122	0.67704	1.68826	450	-27	2016-07-12		103	4	30.2	30.0333	4.45	3.88	1.3439	1.17176	2.51566	477	-8
8	5	30.1	29.6667	4.43	3.72	1.33343	1.11972	2.45315	559	-39	2016-06-18		11	6	23	24.2333	4.91	4.33	1.1293	0.9959	2.1252	454	-15	2016-06-23		27	7	23.9	23.7333	4.24	3.38	1.01336	0.80782	1.82118	455	-26	2016-07-13		103	4	29.4	29.8333	4.47	3.83	1.31418	1.12602	2.4402	480	-7
8	5	31.4	30.7	4.07	3.7	1.27798	1.1618	2.43978	558	-38	2016-06-19		11	6	24	23.7333	5	4.26	1.2	1.0224	2.2224	453	-14	2016-06-24		27	7	25.6	25.6	4.5	3.67	1.152	0.93952	2.09152	462	-25	2016-07-14		103	4	29.9	30.3	4.55	3.78	1.36045	1.13022	2.49067	477	-6
8	5	30.6	31.1667	3.25	3.71	0.9945	1.13526	2.12976	590	-37	2016-06-20		11	6	24.2	24.6	4.93	4.18	1.19306	1.01156	2.20462	463	-13	2016-06-25		27	7	27.3	26.6667	4.83	3.85	1.31859	1.05105	2.36964	461	-24	2016-07-15		103	4	31.6	30.9	4.44	3.76	1.40304	1.18816	2.5912	476	-5
8	5	31.5	31.2667	3.03	3.7	0.95445	1.1655	2.11995	556	-36	2016-06-21		11	6	25.6	25.0333	5.2	4.1	1.3312	1.0496	2.3808	468	-12	2016-06-26		27	7	27.1	27.2333	4.79	3.91	1.29809	1.05961	2.3577	459	-23	2016-07-16		103	4	31.2	31.1667	4.59	3.76	1.43208	1.17312	2.6052	470	-4
8	5	31.7	32.1	3.3	3.69	1.0461	1.16973	2.21583	555	-35	2016-06-22		11	6	25.3	25.7333	5.21	4.11	1.31813	1.03983	2.35796	469	-11	2016-06-27		27	7	27.3	27.7667	4.77	3.95	1.30221	1.07835	2.38056	452	-22	2016-07-17		103	4	30.7	31.5333	4.28	3.8	1.31396	1.1666	2.48056	476	-3
8	5	33.1	33.2333	3.31	3.64	1.09561	1.20484	2.30045	585	-34	2016-06-23		11	6	26.3	25.9	4.61	4.12	1.21243	1.08356	2.29599	454	-10	2016-06-28		27	7	28.9	28.2667	4.83	3.93	1.39587	1.13577	2.53164	461	-21	2016-07-18		103	4	32.7	32.2333	4.46	3.72	1.45842	1.21644	2.67486	472	-2
8	5	34.9	33.9333	3.62	3.6	1.26338	1.2564	2.51978	560	-33	2016-06-24		11	6	26.1	26.3667	4.88	4.1	1.27368	1.0701	2.34378	449	-9	2016-06-29		27	7	28.6	28.6667	4.64	3.96	1.32704	1.13256	2.4596	464	-20	2016-07-19		103	4	33.3	33.6333	4.6	3.66	1.5318	1.21878	2.75058	467	-1
8	5	33.8	34.2	3.04	3.58	1.02752	1.21004	2.23756	554	-32	2016-06-25		11	6	26.7	26.4	5.66	4.17	1.51122	1.11339	2.62461	469	-8	2016-06-30		27	7	28.5	28.9333	4.66	3.94	1.3281	1.1229	2.451	478	-19	2016-07-20		103	4	34.9	34.0333	4.54	3.5	1.58446	1.2215	2.80596	455	0
8	5	33.9	33.2	3.17	3.62	1.07463	1.22718	2.30181	537	-31	2016-06-26		11	6	26.4	26.4333	5.25	4.11	1.386	1.08504	2.47104	461	-7	2016-07-01		27	7	29.7	29.1333	4.66	3.86	1.38402	1.14642	2.53044	463	-18	2016-07-21		103	4	33.9	33.5	4.67	3.55	1.58313	1.20345	2.78658	464	1
8	5	31.9	32.5	3.39	3.61	1.08141	1.15159	2.233	536	-30	2016-06-27		11	6	26.2	26.1	4.96	4.12	1.29952	1.07944	2.37896	459	-6	2016-07-02		27	7	29.2	29.7333	4.55	3.83	1.3286	1.11836	2.44696	470	-17	2016-07-22		103	4	31.7	32	4.57	3.68	1.44869	1.16656	2.61525	467	2
8	5	31.7	32.3	3.98	3.56	1.26166	1.12852	2.39018	516	-29	2016-06-28		11	6	25.7	26.2667	4.56	4.17	1.17192	1.07169	2.24361	461	-5	2016-07-03		27	7	30.3	30.1333	4.57	3.78	1.38471	1.14534	2.53005	471	-16	2016-07-23		103	4	30.4	31.6	4.68	3.65	1.42272	1.1096	2.53232	459	3
8	5	33.3	33.0667	3.87	3.56	1.28871	1.18548	2.47419	538	-28	2016-06-29		11	6	26.9	26.1667	5.13	4.12	1.37997	1.10828	2.48825	460	-4	2016-07-04		27	7	30.9	30.8333	4.45	3.83	1.37505	1.18347	2.55852	467	-15	2016-07-24		103	4	32.7	31.3333	4.46	3.53	1.45842	1.15431	2.61273	468	4
8	5	34.2	34.2	3.58	3.56	1.22436	1.21752	2.44188	547	-27	2016-06-30		11	6	25.9	26.9	4.69	4.09	1.21471	1.05931	2.27402	452	-3	2016-07-05		27	7	31.3	30.4667	4.58	3.81	1.43354	1.19253	2.62607	462	-14	2016-07-25		103	4	30.9	31.6667	4.56	3.57	1.40904	1.10313	2.51217	466	5
8	5	35.1	34.8667	3.34	3.5	1.17234	1.2285	2.40084	544	-26	2016-07-01		11	6	27.9	27.0667	4.8	4.04	1.3392	1.12716	2.46636	455	-2	2016-07-06		27	7	29.2	30.4333	4.52	3.83	1.31984	1.11836	2.4382	499	-13	2016-07-26		103	4	31.4	31.4333	4.46	3.55	1.40044	1.1147	2.51514	458	6
8	5	35.3	35.7	3.39	3.46	1.19667	1.22138	2.41805	562	-25	2016-07-02		11	6	27.4	27.7	4.65	4	1.2741	1.096	2.3701	453	-1	2016-07-07		27	7	30.8	30.1333	4.42	3.83	1.36136	1.17964	2.541	475	-12	2016-07-27		103	4	32	32.6333	4.68	3.48	1.4976	1.1136	2.6112	459	7
8	5	36.7	36.1333	3.55	3.46	1.30285	1.26982	2.57267	550	-24	2016-07-03		11	6	27.8	28.0333	4.96	4.01	1.37888	1.11478	2.49366	452	0	2016-07-08		27	7	30.4	31.1667	4.67	3.8	1.41968	1.1552	2.57488	474	-11	2016-07-28		103	4	34.5	33.3	4.47	3.46	1.54215	1.1937	2.73585	461	8
8	5	36.4	36.0333	3.36	3.45	1.22304	1.2558	2.47884	561	-23	2016-07-04		11	6	28.9	28.0333	5.38	3.99	1.55482	1.15311	2.70793	457	1	2016-07-09		27	7	32.3	31.5	4.5	3.79	1.4535	1.22417	2.67767	484	-10	2016-07-29		103	4	33.4	34	4.33	3.53	1.44622	1.17902	2.62524	475	9
8	5	35	35.7	3.26	3.48	1.141	1.218	2.359	539	-22	2016-07-05		11	6	27.4	27.6667	5.07	4	1.38918	1.096	2.48518	460	2	2016-07-10		27	7	31.8	31.9333	4.82	3.86	1.53276	1.22748	2.76024	471	-9	2016-07-30		103	4	34.1	33.9333	4.44	3.61	1.51404	1.23101	2.74505	472	10
8	5	35.7	35.6	3.34	3.49	1.19238	1.24593	2.43831	539	-21	2016-07-06		11	6	26.7	27.0667	4.84	4.01	1.29228	1.07067	2.36295	463	3	2016-07-11		27	7	31.7	31.6	4.82	3.84	1.52794	1.21728	2.74522	471	-8	2016-07-31		103	4	34.3	33.4333	4.62	3.66	1.58466	1.25538	2.84004	471	11
8	5	36.1	35.2333	3.62	3.49	1.30682	1.25989	2.56671	550	-20	2016-07-07		11	6	27.1	26.5667	4.91	4.04	1.33061	1.09484	2.42545	460	4	2016-07-12		27	7	31.3	31.6333	4.7	3.85	1.4711	1.20505	2.67615	484	-7	2016-08-01		103	4	31.9	32.6	4.55	3.66	1.45145	1.16754	2.61899	460	12
8	5	33.9	34.1667	3.35	3.53	1.13565	1.19667	2.33232	541	-19	2016-07-08		11	6	25.9	26.7333	4.81	4.05	1.24579	1.04895	2.29474	464	5	2016-07-13		27	7	31.9	31.8	4.86	3.8	1.55034	1.2122	2.76254	487	-6	2016-08-02		103	4	31.6	32.4333	4.65	3.65	1.4694	1.1534	2.6228	476	13
8	5	32.5	33.0667	3.56	3.47	1.157	1.12775	2.28475	526	-18	2016-07-09		11	6	27.2	26.7333	4.9	4.06	1.3328	1.10432	2.43712	461	6	2016-07-14		27	7	32.2	31.5	4.82	3.87	1.55204	1.24614	2.79818	477	-5	2016-08-03		103	4	33.8	32.8333	4.68	3.64	1.58184	1.23032	2.81216	466	14
8	5	32.8	33.5	4.22	3.41	1.38416	1.11848	2.50264	530	-17	2016-07-10		11	6	27.1	27.4	4.98	4.08	1.34958	1.10568	2.45526	457	7	2016-07-15		27	7	30.4	31.8667	4.72	3.92	1.43488	1.19168	2.62656	479	-4	2016-08-04		103	4	33.1	33.3	4.57	3.62	1.51267	1.19822	2.71089	493	15
8	5	35.2	34.7	4.15	3.32	1.4608	1.16864	2.62944	545	-16	2016-07-11		11	6	27.9	27.3	5.32	4.07	1.48428	1.13553	2.61981	462	8	2016-07-16		27	7	33	32	4.57	3.91	1.5081	1.2903	2.7984	483	-3	2016-08-05		103	4	33	32.9667	4.71	3.64	1.5543	1.2012	2.7555	463	16
8	5	36.1	35.6	4	3.3	1.444	1.1913	2.6353	543	-15	2016-07-12		11	6	26.9	27.2	5.13	4.15	1.37997	1.11635	2.49632	454	9	2016-07-17		27	7	32.6	32.2667	5.01	3.92	1.63326	1.27792	2.91118	505	-2	2016-08-06		103	4	32.8	32.5667	4.7	3.68	1.5416	1.20704	2.74864	469	17
8	5	35.5	35.7333	3.98	3.34	1.4129	1.1857	2.5986	558	-14	2016-07-13		11	6	26.8	27.2	4.71	4.1	1.26228	1.0988	2.36108	459	10	2016-07-18		27	7	31.2	31.1333	5.26	3.92	1.64112	1.22304	2.86416	472	-1	2016-08-07		103	4	31.9	32.4333	4.63	3.71	1.47697	1.18349	2.66046	467	18
8	5	35.6	35.7667	3.85	3.38	1.3706	1.20328	2.57388	543	-13	2016-07-14		11	6	27.9	27.0333	5.3	4.04	1.4787	1.12716	2.60586	485	11	2016-07-19		27	7	29.6	30.3	4.8	3.92	1.4208	1.16032	2.58112	452	0	2016-08-08		103	4	32.6	32.6333	4.3	3.71	1.4018	1.20946	2.61126	475	19
8	5	36.2	35.6333	3.47	3.4	1.25614	1.2308	2.48694	547	-12	2016-07-15		11	6	26.4	27.7333	5.02	4.03	1.32528	1.06392	2.3892	451	12	2016-07-20		27	7	30.1	30.2667	4.84	3.85	1.45684	1.15885	2.61569	467	1	2016-08-09		103	4	33.4	32.4333	4.93	3.68	1.64662	1.22912	2.87574	470	20
8	5	35.1	35.6667	3.24	3.42	1.13724	1.20042	2.33766	539	-11	2016-07-16		11	6	28.9	27.8333	5.03	4.02	1.45367	1.16178	2.61545	443	13	2016-07-21		27	7	31.1	30.6667	5	3.83	1.555	1.19113	2.74613	478	2	2016-08-10		103	4	31.3	32.5667	5.01	3.7	1.56813	1.1581	2.72623	470	21
8	5	35.7	35.6	3.36	3.43	1.19952	1.22451	2.42403	537	-10	2016-07-17		11	6	28.2	27.7667	5.39	4.02	1.51998	1.13364	2.65362	461	14	2016-07-22		27	7	30.8	31.2333	5.05	3.89	1.5554	1.19812	2.75352	476	3	2016-08-11		103	4	33	32.6	4.67	3.64	1.5411	1.2012	2.7423	469	22
8	5	36	33.3667	3.35	3.48	1.206	1.2528	2.4588	549	-9	2016-07-18		11	6	26.2	27.4333	4.99	4.08	1.30738	1.06896	2.37634	458	15	2016-07-23		27	7	31.8	31.3667	5.26	3.98	1.67268	1.26564	2.93832	525	4	2016-08-12		103	4	33.5	32.9333	4.8	3.71	1.608	1.24285	2.85085	456	23
8	5	28.4	31.0667	3.72	3.5	1.05648	0.994	2.05048	531	-8	2016-07-19		11	6	27.9	27.1667	5.21	4.01	1.45359	1.11879	2.57238	460	16	2016-07-24		27	7	31.5	31.5	5.07	3.99	1.59705	1.25685	2.8539	478	5	2016-08-13		103	4	32.3	32.1333	5.53	3.78	1.78619	1.22094	3.00713	463	24
8	5	28.8	30.9333	3.71	3.52	1.06848	1.01376	2.08224	531	-7	2016-07-20		11	6	27.4	27.0333	5.06	4.05	1.38644	1.1097	2.49614	465	17	2016-07-25		27	7	31.2	31.3	4.94	3.95	1.54128	1.2324	2.77368	480	6	2016-08-14		103	4	30.6	31.2333	4.93	3.78	1.50858	1.15668	2.66526	463	25
8	5	35.6	33.6	3.58	3.53	1.27448	1.25668	2.53116	534	-6	2016-07-21		11	6	25.8	26.2333	4.66	4.11	1.20228	1.06038	2.26266	456	18	2016-07-26		27	7	31.2	31.4667	4.82	3.97	1.50384	1.23864	2.74248	476	7	2016-08-15		103	4	30.8	30.8333	4.79	3.7	1.47532	1.1396	2.61492	462	26
8	5	36.4	35.5333	3.44	3.51	1.25216	1.27764	2.5298	539	-5	2016-07-22		11	6	25.5	25.7667	5.17	4.06	1.31835	1.0353	2.35365	497	19	2016-07-27		27	7	32	31.2667	4.86	3.97	1.5552	1.2704	2.8256	481	8	2016-08-16		103	4	31.1	30.1667	4.4	3.67	1.3684	1.14137	2.50977	465	27
8	5	34.6	36.0333	3.53	3.53	1.22138	1.22138	2.44276	547	-4	2016-07-23		11	6	26	25.8	5.18	4.06	1.3468	1.0556	2.4024	454	20	2016-07-28		27	7	30.6	31.2	4.9	3.98	1.4994	1.21788	2.71728	483	9	2016-08-17		103	4	28.6	29.5667	4.21	3.69	1.20406	1.05534	2.2594	475	28
8	5	37.1	35.6	3.79	3.53	1.40609	1.30963	2.71572	526	-3	2016-07-24		11	6	25.9	26	4.84	4.06	1.25356	1.05154	2.3051	517	21	2016-07-29		27	7	31	30.4	4.82	3.93	1.4942	1.2183	2.7125	478	10	2016-08-18		103	4	29	28.8333	4.43	3.7	1.2847	1.073	2.3577	464	29
8	5	35.1	35.7	3.76	3.52	1.31976	1.23552	2.55528	541	-2	2016-07-25		11	6	26.1	26.7667	4.75	4.04	1.23975	1.05444	2.29419	470	22	2016-07-30		27	7	29.6	30.6333	5.06	3.95	1.49776	1.1692	2.66696	468	11	2016-08-19		103	4	28.9	29.1	4.46	3.7	1.28894	1.0693	2.35824	466	30
8	5	34.9	35.4667	3.59	3.52	1.25291	1.22848	2.48139	531	-1	2016-07-26		11	6	28.3	26.6667	4.97	4.11	1.40651	1.16313	2.56964	452	23	2016-07-31		27	7	31.3	30.4667	5.2	3.84	1.6276	1.20192	2.82952	484	12	2016-08-20		103	4	29.4	29.1667	4.66	3.73	1.37004	1.09662	2.46666	462	31
8	5	36.4	35.8667	4.02	3.54	1.46328	1.28856	2.75184	548	0	2016-07-27		11	6	25.6	26.4667	5.01	4.22	1.28256	1.08032	2.36288	460	24	2016-08-01		27	7	30.5	30.9333	4.97	3.86	1.51585	1.1773	2.69315	479	13	2016-08-21		103	4	29.2	29.6333	4.8	3.71	1.4016	1.08332	2.48492	457	32
8	5	36.3	36.4667	4.08	3.54	1.48104	1.28502	2.76606	548	1	2016-07-28		11	6	25.5	25.4333	5.03	4.16	1.28265	1.0608	2.34345	461	25	2016-08-02		27	7	31	30.8	5.07	3.91	1.5717	1.2121	2.7838	495	14	2016-08-22		103	4	30.3	29.4333	4.59	3.65	1.39077	1.10595	2.49672	469	33
8	5	36.7	36.2333	3.72	3.52	1.36524	1.29184	2.65708	554	2	2016-07-29		11	6	25.2	25.4	5.09	4.17	1.28268	1.05084	2.33352	467	26	2016-08-03		27	7	30.9	30.9	5.07	3.88	1.56663	1.19892	2.76555	487	15	2016-08-23		103	4	28.8	29.7333	4.51	3.72	1.29888	1.07136	2.37024	459	34
8	5	35.7	35.4667	3.75	3.58	1.33875	1.27806	2.61681	555	3	2016-07-30		11	6	25.5	25.6333	5.09	4.19	1.29795	1.06845	2.3664	462	27	2016-08-04		27	7	30.8	31.1	5.19	3.87	1.59852	1.19196	2.79048	487	16	2016-08-24		103	4	30.1	29.8	4.54	3.72	1.36654	1.11972	2.48626	458	35
8	5	34	34.1333	3.82	3.65	1.2988	1.241	2.5398	540	4	2016-07-31		11	6	26.2	25.7667	5.18	4.2	1.35716	1.1004	2.45756	459	28	2016-08-05		27	7	31.6	31.4667	4.79	3.84	1.51364	1.21344	2.72708	497	17	2016-08-25		103	4	30.5	30.1333	4.86	3.75	1.4823	1.14375	2.62605	460	36
8	5	32.7	33	4.09	3.74	1.33743	1.22298	2.56041	544	5	2016-08-01		11	6	25.6	25.4333	4.82	4.17	1.23392	1.06752	2.30144	459	29	2016-08-06		27	7	32	31.5	5.14	3.89	1.6448	1.2448	2.8896	486	18	2016-08-26		103	4	29.8	30.2667	4.89	3.77	1.45722	1.12346	2.58068	468	37
8	5	32.3	32.8	4.11	3.69	1.32753	1.19187	2.5194	539	6	2016-08-02		11	6	24.5	25.1333	4.97	4.18	1.21765	1.0241	2.24175	452	30	2016-08-07		27	7	30.9	30.9	5	3.91	1.545	1.20819	2.75319	487	19	2016-08-27		103	4	30.5	30.1667	4.76	3.75	1.4518	1.14375	2.59555	477	38
8	5	33.4	32.2333	4.34	3.71	1.44956	1.23914	2.6887	554	7	2016-08-03		11	6	25.3	25.6667	4.61	4.14	1.16633	1.04742	2.21375	463	31	2016-08-08		27	7	29.8	30.5	4.85	3.85	1.4453	1.1473	2.5926	482	20	2016-08-28		103	4	30.2	30.2	4.66	3.73	1.40732	1.12646	2.53378	464	39
8	5	31	32.3333	4.5	3.78	1.395	1.1718	2.5668	553	8	2016-08-04		11	6	27.2	26.1333	5.22	4.23	1.41984	1.15056	2.5704	466	32	2016-08-09		27	7	30.8	30.7667	4.78	3.84	1.47224	1.18272	2.65496	488	21	2016-08-29		103	4	29.9	29.3667	4.97	3.75	1.48603	1.12125	2.60728	467	40
8	5	32.6	32.0667	4.53	3.73	1.47678	1.21598	2.69276	546	9	2016-08-05		11	6	25.9	25.3333	5.59	4.29	1.44781	1.11111	2.55892	464	33	2016-08-10		27	7	31.7	31.3667	5.12	3.83	1.62304	1.21411	2.83715	485	22	2016-08-30		103	4	28	28.4667	4.25	3.78	1.19	1.0584	2.2484	466	41
8	5	32.6	32.2	4.36	3.74	1.42136	1.21924	2.6406	539	10	2016-08-06		11	6	22.9	25.1333	4.68	4.3	1.07172	0.9847	2.05642	437	34	2016-08-11		27	7	31.6	30.3333	4.99	3.8	1.57684	1.2008	2.77764	482	23	2016-08-31		103	4	27.5	28.2333	4.54	3.82	1.2485	1.0505	2.299	462	42
8	5	31.4	31.5	4.48	3.78	1.40672	1.18692	2.59364	546	11	2016-08-07		11	6	26.6	25.0667	5.78	4.25	1.53748	1.1305	2.66798	454	35	2016-08-12		27	7	27.7	29.4667	5.02	3.83	1.39054	1.06091	2.45145	458	24	2016-09-01		103	4	29.2	28.7667	5.09	3.72	1.48628	1.08624	2.57252	465	43
8	5	30.5	31.2	4.08	3.77	1.2444	1.14985	2.39425	548	12	2016-08-08		11	6	25.7	26.1333	5.61	4.21	1.44177	1.08197	2.52374	455	36	2016-08-13		27	7	29.1	28.8	5.85	3.72	1.70235	1.08252	2.78487	469	25	2016-09-02		103	4	29.6	29.5667	4.7	3.68	1.3912	1.08928	2.48048	470	44
8	5	31.7	31.2	4.14	3.78	1.31238	1.19826	2.51064	550	13	2016-08-09		11	6	26.1	25.7667	5.37	4.26	1.40157	1.11186	2.51343	451	37	2016-08-14		27	7	29.6	29.3667	4.86	3.7	1.43856	1.0952	2.53376	473	26	2016-09-03		103	4	29.9	29.5	4.9	3.75	1.4651	1.12125	2.58635	462	45
8	5	31.4	30.9333	4.65	3.79	1.4601	1.19006	2.65016	533	14	2016-08-10		11	6	25.5	25.6667	5.39	4.25	1.37445	1.08375	2.4582	465	38	2016-08-15		27	7	29.4	29.0333	5.11	3.76	1.50234	1.10544	2.60778	497	27	2016-09-04		103	4	29	29.1667	4.86	3.76	1.4094	1.0904	2.4998	458	46
8	5	29.7	31.2333	4.76	3.68	1.41372	1.09296	2.50668	516	15	2016-08-11		11	6	25.4	25	5.45	4.24	1.3843	1.07696	2.46126	460	39	2016-08-16		27	7	28.1	28.8667	4.88	3.72	1.37128	1.04532	2.4166	477	28	2016-09-05		103	4	28.6	28.7	4.77	3.76	1.36422	1.07536	2.43958	445	47
8	5	32.6	31.3	4.61	3.52	1.50286	1.14752	2.65038	543	16	2016-08-12		11	6	24.1	24.9333	5.6	4.23	1.3496	1.01943	2.36903	465	40	2016-08-17		27	7	29.1	28.2	4.98	3.69	1.44918	1.07379	2.52297	476	29	2016-09-06		103	4	28.5	28.2	5.05	3.74	1.43925	1.0659	2.50515	463	48
8	5	31.6	31.8667	4.8	3.61	1.5168	1.14076	2.65756	538	17	2016-08-13		11	6	25.3	25.1667	5.29	4.15	1.33837	1.04995	2.38832	456	41	2016-08-18		27	7	27.4	27.6	5.13	3.66	1.40562	1.00284	2.40846	476	30	2016-09-07		103	4	27.5	27.2667	5.16	3.67	1.419	1.00925	2.42825	461	49
8	5	31.4	31.6333	4.1	3.58	1.2874	1.12412	2.41152	543	18	2016-08-14		11	6	26.1	25.9333	5.42	4.17	1.41462	1.08837	2.50299	460	42	2016-08-19		27	7	26.3	26.9667	4.72	3.68	1.24136	0.96784	2.2092	496	31	2016-09-08		103	4	25.8	26.8	5.07	3.66	1.30806	0.94428	2.25234	448	50
8	5	31.9	31.8667	3.73	3.6	1.18987	1.1484	2.33827	549	19	2016-08-15		11	6	26.4	26.3667	5.54	4.21	1.46256	1.11144	2.574	463	43	2016-08-20		27	7	27.2	26.9667	4.88	3.61	1.32736	0.98192	2.30928	479	32	2016-09-09		103	4	27.1	26.9667	5.38	3.67	1.45798	0.99457	2.45255	451	51
8	5	32.3	32	3.92	3.61	1.26616	1.16603	2.43219	592	20	2016-08-16		11	6	26.6	26.1333	5.38	4.2	1.43108	1.1172	2.54828	466	44	2016-08-21		27	7	27.4	27.4667	4.84	3.59	1.32616	0.98366	2.30982	490	33	2016-09-10		103	4	28	27.7667	4.99	3.68	1.3972	1.0304	2.4276	456	52
8	5	31.8	32.1	3.48	3.64	1.10664	1.15752	2.26416	563	21	2016-08-17		11	6	25.4	25.8	5.16	4.21	1.31064	1.06934	2.37998	458	45	2016-08-22		27	7	27.8	28	4.83	3.61	1.34274	1.00358	2.34632	490	34	2016-09-11		103	4	28.2	27.7333	4.87	3.73	1.37334	1.05186	2.4252	447	53
8	5	32.2	32	3.57	3.65	1.14954	1.1753	2.32484	555	22	2016-08-18		11	6	25.4	25.8333	5.45	4.25	1.3843	1.0795	2.4638	459	46	2016-08-23		27	7	28.8	28.0667	5.05	3.66	1.4544	1.05408	2.50848	485	35	2016-09-12		103	4	27	27.4333	4.93	3.75	1.3311	1.0125	2.3436	448	54
8	5	32	32	3.51	3.63	1.1232	1.1616	2.2848	556	23	2016-08-19		11	6	26.7	25.6667	5.6	4.23	1.4952	1.12941	2.62461	458	47	2016-08-24		27	7	27.6	28.4333	4.82	3.66	1.33032	1.01016	2.34048	478	36	2016-09-13		103	4	27.1	27.4333	4.96	3.71	1.34416	1.00541	2.34957	457	55
8	5	31.8	31.8333	3.76	3.68	1.19568	1.17024	2.36592	550	24	2016-08-20		11	6	24.9	25.7667	5.39	4.17	1.34211	1.03833	2.38044	473	48	2016-08-25		27	7	28.9	28.2667	4.71	3.65	1.36119	1.05485	2.41604	489	37	2016-09-14		103	4	28.2	27.8333	4.83	3.65	1.36206	1.0293	2.39136	460	56
8	5	31.7	31.4667	4.26	3.7	1.35042	1.1729	2.52332	551	25	2016-08-21		11	6	25.7	25.3667	5.84	4.2	1.50088	1.0794	2.58028	512	49	2016-08-26		27	7	28.3	28.9667	4.68	3.72	1.32444	1.05276	2.3772	513	38	2016-09-15		103	4	28.2	27.8	4.68	3.64	1.31976	1.02648	2.34624	453	57
8	5	30.9	31.3	3.64	3.65	1.12476	1.12785	2.25261	551	26	2016-08-22		11	6	25.5	25.5333	5.95	4.17	1.51725	1.06335	2.5806	452	50	2016-08-27		27	7	29.7	29.1667	4.9	3.72	1.4553	1.10484	2.56014	486	39	2016-09-16		103	4	27	27.7333	4.71	3.76	1.2717	1.0152	2.2869	463	58
8	5	31.3	31.4333	3.75	3.63	1.17375	1.13619	2.30994	550	27	2016-08-23		11	6	25.4	25.7333	5.28	4.13	1.34112	1.04902	2.39014	449	51	2016-08-28		27	7	29.5	29.8667	5.14	3.68	1.5163	1.0856	2.6019	493	40	2016-09-17		103	4	28	28.0333	4.66	3.78	1.3048	1.0584	2.3632	455	59
8	5	32.1	32.0333	3.68	3.66	1.18128	1.17486	2.35614	548	28	2016-08-24		11	6	26.3	26.0667	5.85	4.16	1.53855	1.09408	2.63263	459	52	2016-08-29		27	7	30.4	29.7333	4.46	3.74	1.35584	1.13696	2.4928	481	41	2016-09-18		103	4	29.1	28.5667	5.06	3.71	1.47246	1.07961	2.55207	455	60
8	5	32.7	32.1667	4.3	3.64	1.4061	1.19028	2.59638	552	29	2016-08-25		11	6	26.5	26.3	4.93	4.1	1.30645	1.0865	2.39295	506	53	2016-08-30		27	7	29.3	29.4667	4.8	3.73	1.4064	1.09289	2.49929	486	42	2016-09-19		103	4	28.6	28.2333	4.83	3.75	1.38138	1.0725	2.45388	464	61
8	5	31.7	31.5333	4.25	3.69	1.34725	1.16973	2.51698	546	30	2016-08-26		11	6	26.1	25.7	5.56	4.19	1.45116	1.09359	2.54475	457	54	2016-08-31		27	7	28.7	29.1667	5.03	3.73	1.44361	1.07051	2.51412	480	43	2016-09-20		103	4	27	27.8333	4.47	3.71	1.2069	1.0017	2.2086	464	62
8	5	30.2	31.1333	4.08	3.7	1.23216	1.1174	2.34956	555	31	2016-08-27		11	6	24.5	25.4	5.22	4.16	1.2789	1.0192	2.2981	433	55	2016-09-01		27	7	29.5	28.8667	4.51	3.72	1.33045	1.0974	2.42785	492	44	2016-09-21		103	4	27.9	27.5333	4.48	3.6	1.24992	1.0044	2.25432	459	63
8	5	31.5	30.9667	4.29	3.66	1.35135	1.1529	2.50425	554	32	2016-08-28		11	6	25.6	24.7	5.23	4.08	1.33888	1.04448	2.38336	454	56	2016-09-02		27	7	28.4	29.1333	4.85	3.68	1.3774	1.04512	2.42252	484	45	2016-09-22		103	4	27.7	27.7333	4.66	3.62	1.29082	1.00274	2.29356	462	64
8	5	31.2	30.9333	4.55	3.71	1.4196	1.15752	2.57712	559	33	2016-08-29		11	6	24	24.8333	5.52	4.03	1.3248	0.9672	2.292	455	57	2016-09-03		27	7	29.5	28.9667	5.11	3.69	1.50745	1.08855	2.596	483	46	2016-09-23		103	4	27.6	27.5333	5.06	3.68	1.39656	1.01568	2.41224	470	65
8	5	30.1	31.0333	4.17	3.7	1.25517	1.1137	2.36887	553	34	2016-08-30		11	6	24.9	24.5333	5.33	4.04	1.32717	1.00596	2.33313	456	58	2016-09-04		27	7	29	28	4.88	3.71	1.4152	1.0759	2.4911	500	47	2016-09-24		103	4	27.3	27.2667	5.18	3.71	1.41414	1.01283	2.42697	467	66
8	5	31.8	30.2667	4.14	3.68	1.31652	1.17024	2.48676	553	35	2016-08-31		11	6	24.7	24.8	5.31	4.02	1.31157	0.99294	2.30451	458	59	2016-09-05		27	7	25.5	26.6	4.21	3.73	1.07355	0.95115	2.0247	457	48	2016-09-25		103	4	26.9	26.8333	4.86	3.66	1.30734	0.98454	2.29188	464	67
8	5	28.9	30.1	4.13	3.74	1.19357	1.08086	2.27443	549	36	2016-09-01		11	6	24.8	24.5	5.4	3.98	1.3392	0.98704	2.32624	467	60	2016-09-06		27	7	25.3	26.5333	4.82	3.71	1.21946	0.93863	2.15809	459	49	2016-09-26		103	4	26.3	26.6333	4.69	3.68	1.23347	0.96784	2.20131	459	68
8	5	29.6	29.4333	4.35	3.69	1.2876	1.09224	2.37984	580	37	2016-09-02		11	6	24	24.3	5.38	3.95	1.2912	0.948	2.2392	458	61	2016-09-07		27	7	28.8	27.8667	5.08	3.51	1.46304	1.01088	2.47392	482	50	2016-09-27		103	4	26.7	26.3333	4.91	3.71	1.31097	0.99057	2.30154	462	69
8	5	29.8	29.6333	4.06	3.64	1.20988	1.08472	2.2946	554	38	2016-09-03		11	6	24.1	24.3	5.12	3.9	1.23392	0.9399	2.17382	449	62	2016-09-08		27	7	29.5	28.9	5.07	3.6	1.49565	1.062	2.55765	484	51	2016-09-28		103	4	26	26	4.93	3.7	1.2818	0.962	2.2438	458	70
8	5	29.5	29.5667	3.77	3.62	1.11215	1.0679	2.18005	545	39	2016-09-04		11	6	24.8	24.5333	5.63	3.93	1.39624	0.97464	2.37088	460	63	2016-09-09		27	7	28.4	29.0333	5.14	3.69	1.45976	1.04796	2.50772	489	52	2016-09-29		103	4	25.3	25.8667	4.87	3.68	1.23211	0.93104	2.16315	465	71
8	5	29.4	29.5333	4.14	3.64	1.21716	1.07016	2.28732	548	40	2016-09-05		11	6	24.7	24.4333	5.75	3.95	1.42025	0.97565	2.3959	452	64	2016-09-10		27	7	29.2	28.1333	4.94	3.67	1.44248	1.07164	2.51412	506	53	2016-09-30		103	4	26.3	25.4	4.99	3.63	1.31237	0.95469	2.26706	464	72
8	5	29.7	28.9667	4.05	3.6	1.20285	1.0692	2.27205	546	41	2016-09-06		11	6	23.8	23.9	5.36	3.97	1.27568	0.94486	2.22054	457	65	2016-09-11		27	7	26.8	27.8667	4.53	3.68	1.21404	0.98624	2.20028	529	54	2016-10-01		103	4	24.6	25.4333	4.84	3.67	1.19064	0.90282	2.09346	459	73
8	5	27.8	28.9667	3.61	3.53	1.00358	0.98134	1.98492	548	42	2016-09-07		11	6	23.2	23.6	5.79	3.99	1.34328	0.92568	2.26896	460	66	2016-09-12		27	7	27.6	27.5667	4.64	3.67	1.28064	1.01292	2.29356	485	55	2016-10-02		103	4	25.4	25.1	4.85	3.68	1.2319	0.93472	2.16662	451	74
8	5	29.4	28.8	3.39	3.5	0.99666	1.029	2.02566	551	43	2016-09-08		11	6	23.8	23.0333	5.8	3.94	1.3804	0.93772	2.31812	463	67	2016-09-13		27	7	28.3	28.3667	4.88	3.65	1.38104	1.03295	2.41399	486	56	2016-10-03		103	4	25.3	25.4667	5.28	3.69	1.33584	0.93357	2.26941	463	75
8	5	29.2	29.7	4.07	3.54	1.18844	1.03368	2.22212	553	44	2016-09-09		11	6	22.1	22.1333	6.09	3.99	1.34589	0.88179	2.22768	481	68	2016-09-14		27	7	29.2	28.4667	5.11	3.67	1.49212	1.07164	2.56376	494	57	2016-10-04		103	4	25.7	26	5.09	3.65	1.30813	0.93805	2.24618	458	76
8	5	30.5	30.1667	3.85	3.54	1.17425	1.0797	2.25395	549	45	2016-09-10		11	6	20.5	20.8667	5.53	4.01	1.13365	0.82205	1.9557	454	69	2016-09-15		27	7	27.9	28.7333	4.96	3.74	1.38384	1.04346	2.4273	489	58	2016-10-05		103	4	27	26.5	5.08	3.64	1.3716	0.9828	2.3544	461	77
8	5	30.8	30.4333	3.95	3.53	1.2166	1.08724	2.30384	547	46	2016-09-11		11	6	20	20.4	5.5	4	1.1	0.8	1.9	457	70	2016-09-16		27	7	29.1	28.9333	4.87	3.68	1.41717	1.07088	2.48805	493	59	2016-10-06		103	4	26.8	26.8667	5.01	3.68	1.34268	0.98624	2.32892	459	78
8	5	30	30.2	3.76	3.53	1.128	1.059	2.187	541	47	2016-09-12		11	6	20.7	20.8667	6.49	3.91	1.34343	0.80937	2.1528	456	71	2016-09-17		27	7	29.8	29.1667	4.75	3.68	1.4155	1.09664	2.51214	486	60	2016-10-07		103	4	26.8	26.4333	5.04	3.73	1.35072	0.99964	2.35036	469	79
8	5	29.8	30.2	3.56	3.46	1.06088	1.03108	2.09196	573	48	2016-09-13		11	6	21.9	21.5667	6.12	3.85	1.34028	0.84315	2.18343	459	72	2016-09-18		27	7	28.6	28.8667	4.9	3.74	1.4014	1.06964	2.47104	500	61	2016-10-08		103	4	25.7	26.3333	5.01	3.74	1.28757	0.96118	2.24875	461	80
8	5	30.8	30.1667	4.01	3.55	1.23508	1.0934	2.32848	551	49	2016-09-14		11	6	22.1	22.2333	5.18	3.9	1.14478	0.8619	2.00668	457	73	2016-09-19		27	7	28.2	28.0667	4.88	3.71	1.37616	1.04622	2.42238	494	62	2016-10-09		103	4	26.5	25.0667	4.98	3.72	1.3197	0.9858	2.3055	462	81
8	5	29.9	29.6667	3.96	3.57	1.18404	1.06743	2.25147	549	50	2016-09-15		11	6	22.7	22.3667	5.22	3.97	1.18494	0.90119	2.08613	452	74	2016-09-20		27	7	27.4	27.3	5.12	3.72	1.40288	1.01928	2.42216	490	63	2016-10-10		103	4	23	24.3667	4.89	3.73	1.1247	0.8579	1.9826	456	82
8	5	28.3	29.6667	3.75	3.6	1.06125	1.0188	2.08005	548	51	2016-09-16		11	6	22.3	22.0333	5.42	3.95	1.20866	0.88085	2.08951	442	75	2016-09-21		27	7	26.3	25.7	5.33	3.67	1.40179	0.96521	2.367	497	64	2016-10-11		103	4	23.6	23.1333	4.97	3.7	1.17292	0.8732	2.04612	459	83
8	5	30.8	30.0667	4.28	3.52	1.31824	1.08416	2.4024	554	52	2016-09-17		11	6	21.1	22	4.82	3.91	1.01702	0.82501	1.84203	421	76	2016-09-22		27	7	23.4	25.5667	5.16	3.6	1.20744	0.8424	2.04984	470	65	2016-10-12		103	4	22.8	23.5	4.94	3.61	1.12632	0.82308	1.9494	456	84
8	5	31.1	30.6667	3.97	3.52	1.23467	1.09472	2.32939	555	53	2016-09-18		11	6	22.6	22.5	5.17	3.85	1.16842	0.8701	2.03852	445	77	2016-09-23		27	7	27	25.8333	5.02	3.53	1.3554	0.9531	2.3085	490	66	2016-10-13		103	4	24.1	24.1333	5.02	3.57	1.20982	0.86037	2.07019	462	85
8	5	30.1	30.1667	3.74	3.51	1.12574	1.05651	2.18225	547	54	2016-09-19		11	6	23.8	22.8667	5.7	3.85	1.3566	0.9163	2.2729	446	78	2016-09-24		27	7	27.1	26.9	4.67	3.59	1.26557	0.97289	2.23846	497	67	2016-10-14		103	4	25.5	24.7333	5.11	3.67	1.30305	0.93585	2.2389	461	86
8	5	29.3	29.6667	3.92	3.53	1.14856	1.03429	2.18285	546	55	2016-09-20		11	6	22.2	22.8333	5.67	3.94	1.25874	0.87468	2.13342	448	79	2016-09-25		27	7	26.6	27.4333	4.66	3.76	1.23956	1.00016	2.23972	494	68	2016-10-15		103	4	24.6	24	4.87	3.7	1.19802	0.9102	2.10822	460	87
8	5	29.6	29.4	3.9	3.52	1.1544	1.04192	2.19632	541	56	2016-09-21		11	6	22.5	22.2667	5.43	3.96	1.22175	0.891	2.11275	448	80	2016-09-26		27	7	28.6	27.4	5.02	3.67	1.43572	1.04962	2.48534	492	69	2016-10-16		103	4	21.9	23	5.11	3.74	1.11909	0.81906	1.93815	463	88
8	5	29.3	29.4667	3.79	3.49	1.11047	1.02257	2.13304	567	57	2016-09-22		11	6	22.1	22.4667	5.46	3.94	1.20666	0.87074	2.0774	448	81	2016-09-27		27	7	27	27.2667	5.27	3.66	1.4229	0.9882	2.4111	530	70	2016-10-17		103	4	22.5	22.4667	5.05	3.64	1.13625	0.819	1.95525	465	89
8	5	29.5	29.1667	3.78	3.5	1.1151	1.0325	2.1476	552	58	2016-09-23		11	6	22.8	22.5	5.17	3.91	1.17876	0.89148	2.07024	454	82	2016-09-28		27	7	26.2	26.4	4.59	3.65	1.20258	0.9563	2.15888	471	71	2016-10-18		103	4	23	22.7667	4.96	3.6	1.1408	0.828	1.9688	467	90
8	5	28.7	28.9	3.57	3.5	1.02459	1.0045	2.02909	566	59	2016-09-24		11	6	22.6	22.8333	5.51	3.94	1.24526	0.89044	2.1357	455	83	2016-09-29		27	7	26	26.5	4.77	3.55	1.2402	0.923	2.1632	487	72	2016-10-19		103	4	22.8	23.3667	4.77	3.62	1.08756	0.82536	1.91292	468	91
8	5	28.5	28.5333	3.44	3.53	0.9804	1.00605	1.98645	555	60	2016-09-25		11	6	23.1	22.6333	5.61	3.94	1.29591	0.91014	2.20605	453	84	2016-09-30		27	7	27.3	26.7333	5.17	3.55	1.41141	0.96915	2.38056	482	73	2016-10-20		103	4	24.3	23.6667	4.92	3.64	1.19556	0.88452	2.08008	464	92
8	5	28.4	28.5333	3.77	3.53	1.07068	1.00252	2.0732	553	61	2016-09-26		11	6	22.2	22.3333	5.77	3.95	1.28094	0.8769	2.15784	451	85	2016-10-01		27	7	26.9	26.9	5.08	3.58	1.36652	0.96302	2.32954	501	74	2016-10-21		103	4	23.9	23.9	5.07	3.64	1.21173	0.86996	2.08169	464	93
8	5	28.7	28.7333	3.82	3.51	1.09634	1.00737	2.10371	557	62	2016-09-27		11	6	21.7	22.0333	5.37	3.92	1.16529	0.85064	2.01593	448	86	2016-10-02		27	7	26.5	27.5667	5.05	3.54	1.33825	0.9381	2.27635	487	75	2016-10-22		103	4	23.5	23.0333	4.87	3.69	1.14445	0.86715	2.0116	496	94
8	5	29.1	28.7333	3.88	3.46	1.12908	1.00686	2.13594	559	63	2016-09-28		11	6	22.2	22.3	5.34	3.91	1.18548	0.86802	2.0535	446	87	2016-10-03		27	7	29.3	28.3333	4.93	3.57	1.44449	1.04601	2.4905	485	76	2016-10-23		103	4	21.7	23.2667	4.67	3.71	1.01339	0.80507	1.81846	464	95
8	5	28.4	28.6	3.75	3.5	1.065	0.994	2.059	558	64	2016-09-29		11	6	23	22.7	5.46	3.9	1.2558	0.897	2.1528	465	88	2016-10-04		27	7	29.2	28.8333	5.1	3.63	1.4892	1.05996	2.54916	483	77	2016-10-24		103	4	24.6	23.8333	5.4	3.69	1.3284	0.90774	2.23614	460	96
8	5	28.3	28.0667	3.98	3.48	1.12634	0.98484	2.11118	545	65	2016-09-30		11	6	22.9	22.9667	5.9	3.95	1.3511	0.90455	2.25565	494	89	2016-10-05		27	7	28	28.4333	4.84	3.65	1.3552	1.022	2.3772	516	78	2016-10-25		103	4	25.2	24.4333	5.03	3.6	1.26756	0.9072	2.17476	466	97
8	5	27.5	28.3	3.85	3.48	1.05875	0.957	2.01575	547	66	2016-10-01		11	6	23	22.5333	5.41	3.94	1.2443	0.9062	2.1505	446	90	2016-10-06		27	7	28.1	27.8333	4.89	3.67	1.37409	1.03127	2.40536	488	79	2016-10-26		103	4	23.5	23.7667	4.67	3.65	1.09745	0.85775	1.9552	463	98
8	5	29.1	28.7	3.73	3.44	1.08543	1.00104	2.08647	553	67	2016-10-02		11	6	21.7	22.2333	5.73	4.02	1.24341	0.87234	2.11575	477	91	2016-10-07		27	7	27.4	28.0333	4.87	3.68	1.33438	1.00832	2.3427	497	80	2016-10-27		103	4	22.6	23.3667	4.95	3.68	1.1187	0.83168	1.95038	457	99
8	5	29.5	29.3	3.75	3.43	1.10625	1.01185	2.1181	554	68	2016-10-03		11	6	22	20.1333	5.8	3.98	1.276	0.8756	2.1516	520	92	2016-10-08		27	7	28.6	28.5	4.93	3.64	1.40998	1.04104	2.45102	491	81	2016-10-28		103	4	24	23.8	4.96	3.65	1.1904	0.876	2.0664	458	100
8	5	29.3	29.3	3.39	3.45	0.99327	1.01085	2.00412	551	69	2016-10-04		11	6	16.7	21.1	5.86	3.98	0.97862	0.66466	1.64328	462	93	2016-10-09		27	7	29.5	29.3	4.96	3.59	1.4632	1.05905	2.52225	527	82	2016-10-29		103	4	24.8	24.4	5.03	3.67	1.24744	0.91016	2.1576	465	101
8	5	29.1	28.9667	3.63	3.41	1.05633	0.99231	2.04864	559	70	2016-10-05		11	6	24.6	20.8667	5.62	4.02	1.38252	0.98892	2.37144	455	94	2016-10-10		27	7	29.8	29.0667	5.3	3.63	1.5794	1.08174	2.66114	489	83	2016-10-30		103	4	24.4	24.8333	5.11	3.7	1.24684	0.9028	2.14964	462	102
8	5	28.5	28.9	3.3	3.37	0.9405	0.96045	1.90095	556	71	2016-10-06		11	6	21.3	21.8333	6.18	3.96	1.31634	0.84348	2.15982	483	95	2016-10-11		27	7	27.9	29.0333	5.07	3.67	1.41453	1.02393	2.43846	486	84	2016-10-31		103	4	25.3	25.0333	4.96	3.69	1.25488	0.93357	2.18845	463	103
8	5	29.1	28.7667	3.71	3.42	1.07961	0.99522	2.07483	552	72	2016-10-07		11	6	19.6	21.2667	5.28	4.02	1.03488	0.78792	1.8228	460	96	2016-10-12		27	7	29.4	28.7	4.97	3.68	1.46118	1.08192	2.5431	483	85	2016-11-01		103	4	25.4	25.3667	4.84	3.75	1.22936	0.9525	2.18186	463	104
8	5	28.7	28.8333	3.66	3.44	1.05042	0.98728	2.0377	546	73	2016-10-08		11	6	22.9	20.3667	5.56	3.93	1.27324	0.89997	2.17321	461	97	2016-10-13		27	7	28.8	29	5.25	3.72	1.512	1.07136	2.58336	491	86	2016-11-02		103	4	25.4	25.5333	4.93	3.79	1.25222	0.96266	2.21488	460	105
8	5	28.7	28.1	3.79	3.43	1.08773	0.98441	2.07214	555	74	2016-10-09		11	6	18.6	20.5667	5.17	3.91	0.96162	0.72726	1.68888	428	98	2016-10-14		27	7	28.8	28.7	5.29	3.74	1.52352	1.07712	2.60064	479	87	2016-11-03		103	4	25.8	25.6667	5.07	3.79	1.30806	0.97782	2.28588	464	106
8	5	26.9	26.8	3.89	3.48	1.04641	0.93612	1.98253	549	75	2016-10-10		11	6	20.2	19.8	5.93	3.95	1.19786	0.7979	1.99576	453	99	2016-10-15		27	7	28.5	28.2	4.97	3.77	1.41645	1.07445	2.4909	496	88	2016-11-04		103	4	25.8	25.8333	4.63	3.8	1.19454	0.9804	2.17494	461	107
8	5	24.8	25.2	4.58	3.54	1.13584	0.87792	2.01376	541	76	2016-10-11		11	6	20.6	20.6	5.88	3.82	1.21128	0.78692	1.9982	462	100	2016-10-16		27	7	27.3	26.9667	5.02	3.76	1.37046	1.02648	2.39694	480	89	2016-11-05		103	4	25.9	25.8667	4.65	3.87	1.20435	1.00233	2.20668	472	108
8	5	23.9	25.6	4.19	3.49	1.00141	0.83411	1.83552	538	77	2016-10-12		11	6	21	21.1333	5.87	3.9	1.2327	0.819	2.0517	458	101	2016-10-17		27	7	25.1	26.1333	4.96	3.79	1.24496	0.95129	2.19625	484	90	2016-11-06		103	4	25.9	25.4	5.08	3.85	1.31572	0.99715	2.31287	469	109
8	5	28.1	26.3333	4.1	3.41	1.1521	0.95821	2.11031	547	78	2016-10-13		11	6	21.8	21.1333	5.51	3.88	1.20118	0.84584	2.04702	501	102	2016-10-18		27	7	26	25.8	5	3.67	1.3	0.9542	2.2542	507	91	2016-11-07		103	4	24.4	24.7667	5.01	3.83	1.22244	0.93452	2.15696	466	110
8	5	27	26.8667	4.02	3.45	1.0854	0.9315	2.0169	570	79	2016-10-14		11	6	20.6	21.6	5.18	3.88	1.06708	0.79928	1.86636	453	103	2016-10-19		27	7	26.3	26.2	5.22	3.66	1.37286	0.96258	2.33544	484	92	2016-11-08		103	4	24	24.2	5.06	3.86	1.2144	0.9264	2.1408	471	111
8	5	25.5	25.6333	3.9	3.54	0.9945	0.9027	1.8972	575	80	2016-10-15		11	6	22.4	21.2667	5.36	3.88	1.20064	0.86912	2.06976	466	104	2016-10-20		27	7	26.3	25.5	5.26	3.75	1.38338	0.98625	2.36963	486	93	2016-11-09		103	4	24.2	24	4.96	3.8	1.20032	0.9196	2.11992	472	112
8	5	24.4	25.1333	4.24	3.52	1.03456	0.85888	1.89344	547	81	2016-10-16		11	6	20.8	21.5333	5.19	3.87	1.07952	0.80496	1.88448	531	105	2016-10-21		27	7	23.9	24.9333	5.16	3.85	1.23324	0.92015	2.15339	488	94	2016-11-10		103	4	23.8	23.6667	5.02	3.83	1.19476	0.91154	2.1063	458	113
8	5	25.5	25.4	4.65	3.51	1.18575	0.89505	2.0808	548	82	2016-10-17		11	6	21.4	21.4	5.34	3.85	1.14276	0.8239	1.96666	455	106	2016-10-22		27	7	24.6	24.7	5.31	3.85	1.30626	0.9471	2.25336	489	95	2016-11-11		103	4	23	23.7667	5.13	3.86	1.1799	0.8878	2.0677	466	114
8	5	26.3	25.8333	4.58	3.45	1.20454	0.90735	2.11189	557	83	2016-10-18		11	6	22	21.2667	4.95	3.82	1.089	0.8404	1.9294	441	107	2016-10-23		27	7	25.6	26.1333	5.16	3.79	1.32096	0.97024	2.2912	492	96	2016-11-12		103	4	24.5	24.1333	5.25	3.88	1.28625	0.9506	2.23685	478	115
8	5	25.7	26.0333	4.1	3.45	1.0537	0.88665	1.94035	548	84	2016-10-19		11	6	20.4	20.4333	5.21	3.85	1.06284	0.7854	1.84824	451	108	2016-10-24		27	7	28.2	26.8333	5.34	3.85	1.50588	1.0857	2.59158	482	97	2016-11-13		103	4	24.9	24.7333	5.29	3.97	1.31721	0.98853	2.30574	466	116
8	5	26.1	26.3333	3.97	3.46	1.03617	0.90306	1.93923	546	85	2016-10-20		11	6	18.9	19.1	5.02	3.88	0.94878	0.73332	1.6821	459	109	2016-10-25		27	7	26.7	27.1333	5.4	3.95	1.4418	1.05465	2.49645	484	98	2016-11-14		103	4	24.8	25.2	5.28	4.06	1.30944	1.00688	2.31632	459	117
8	5	27.2	26.4	3.65	3.36	0.9928	0.91392	1.90672	549	86	2016-10-21		11	6	18	19.2	5.03	3.85	0.9054	0.693	1.5984	458	110	2016-10-26		27	7	26.5	26.2667	5.23	3.94	1.38595	1.0441	2.43005	488	99	2016-11-15		103	4	25.9	25.1667	5.34	4.08	1.38306	1.05672	2.43978	461	118
8	5	25.9	26.7	3.64	3.36	0.94276	0.87024	1.813	549	87	2016-10-22		11	6	20.7	19.2333	5.48	3.81	1.13436	0.78867	1.92303	463	111	2016-10-27		27	7	25.6	25.6	5.41	3.96	1.38496	1.01376	2.39872	484	100	2016-11-16		103	4	24.8	24.7333	5.27	4.15	1.30696	1.0292	2.33616	469	119
8	5	27	26.7667	3.42	3.36	0.9234	0.9072	1.8306	552	88	2016-10-23		11	6	19	20	5.13	3.83	0.9747	0.7277	1.7024	490	112	2016-10-28		27	7	24.7	25.5333	5.63	3.99	1.39061	0.98553	2.37614	475	101	2016-11-17		103	4	23.5	23.7333	5.15	4.11	1.21025	0.96585	2.1761	466	120
8	5	27.4	27.4667	3.77	3.41	1.03298	0.93434	1.96732	546	89	2016-10-24		11	6	20.3	20.2333	5.31	3.89	1.07793	0.78967	1.8676	456	113	2016-10-29		27	7	26.3	25.7	5.97	3.94	1.57011	1.03622	2.60633	479	102	2016-11-18		103	4	22.9	23.6667	5.52	4.05	1.26408	0.92745	2.19153	464	121
8	5	28	27.6333	4.18	3.35	1.1704	0.938	2.1084	551	90	2016-10-25		11	6	21.4	21.2667	5.13	4	1.09782	0.856	1.95382	463	114	2016-10-30		27	7	26.1	25.8333	5.73	3.93	1.49553	1.02573	2.52126	489	103	2016-11-19		103	4	24.6	23.5667	5.79	4.02	1.42434	0.98892	2.41326	463	122
8	5	27.5	27.6667	3.83	3.41	1.05325	0.93775	1.991	549	91	2016-10-26		11	6	22.1	22.0667	5.88	4.05	1.29948	0.89505	2.19453	457	115	2016-10-31		27	7	25.1	25.4667	5.87	4.01	1.47337	1.00651	2.47988	481	104	2016-11-20		103	4	23.2	24	5.37	4.05	1.24584	0.9396	2.18544	473	123
8	5	27.5	27.7667	3.5	3.36	0.9625	0.924	1.8865	550	92	2016-10-27		11	6	22.7	22.5	5.62	4.12	1.27574	0.93524	2.21098	458	116	2016-11-01		27	7	25.2	24.8667	5.85	3.98	1.4742	1.00296	2.47716	486	105	2016-11-21		103	4	24.2	24.1	5.61	4.06	1.35762	0.98252	2.34014	474	124
8	5	28.3	27.8333	3.34	3.33	0.94522	0.94239	1.88761	546	93	2016-10-28		11	6	22.7	23	5.18	4.15	1.17586	0.94205	2.11791	454	117	2016-11-02		27	7	24.3	25	5.78	3.95	1.40454	0.95985	2.36439	488	106	2016-11-22		103	4	24.9	24.4	5.52	4.1	1.37448	1.0209	2.39538	466	125
8	5	27.7	28.2667	3.4	3.32	0.9418	0.91964	1.86144	538	94	2016-10-29		11	6	23.6	23.2	5.27	4.15	1.24372	0.9794	2.22312	444	118	2016-11-03		27	7	25.5	24.8667	5.65	3.91	1.44075	0.99705	2.4378	514	107	2016-11-23		103	4	24.1	24.0667	5.41	4.16	1.30381	1.00256	2.30637	473	126
8	5	28.8	28.2667	3.75	3.36	1.08	0.96768	2.04768	536	95	2016-10-30		11	6	23.3	21.6	5.46	4.13	1.27218	0.96229	2.23447	442	119	2016-11-04		27	7	24.8	25.1667	5.7	3.98	1.4136	0.98704	2.40064	492	108	2016-11-24		103	4	23.2	23.6667	5.28	4.17	1.22496	0.96744	2.1924	467	127
8	5	28.3	28.7667	3.5	3.36	0.9905	0.95088	1.94138	552	96	2016-10-31		11	6	17.9	21.0667	5.55	4.16	0.99345	0.74464	1.73809	434	120	2016-11-05		27	7	25.2	25.4	5.64	3.93	1.42128	0.99036	2.41164	480	109	2016-11-25		103	4	23.7	23.5667	5.43	4.1	1.28691	0.9717	2.25861	460	128
8	5	29.2	29.0667	3.38	3.43	0.98696	1.00156	1.98852	548	97	2016-11-01		11	6	22	20.4	5.74	4.03	1.2628	0.8866	2.1494	444	121	2016-11-06		27	7	26.2	24.9	5.83	3.9	1.52746	1.0218	2.54926	490	110	2016-11-26		103	4	23.8	23.8333	5.61	4.06	1.33518	0.96628	2.30146	468	129
8	5	29.7	29.5667	3.67	3.43	1.08999	1.01871	2.1087	559	98	2016-11-02		11	6	21.3	21.6333	6.17	3.98	1.31421	0.84774	2.16195	450	122	2016-11-07		27	7	23.3	23.9	5.66	3.92	1.31878	0.91336	2.23214	481	111	2016-11-27		103	4	24	23.6333	5.55	4.04	1.332	0.9696	2.3016	461	130
8	5	29.8	29.4333	3.62	3.45	1.07876	1.0281	2.10686	534	99	2016-11-03		11	6	21.6	21.6667	5.78	4.04	1.24848	0.87264	2.12112	452	123	2016-11-08		27	7	22.2	22.8	5.79	3.89	1.28538	0.86358	2.14896	494	112	2016-11-28		103	4	23.1	23.6333	5.61	4.11	1.29591	0.94941	2.24532	472	131
8	5	28.8	28.9667	3.68	3.51	1.05984	1.01088	2.07072	539	100	2016-11-04		11	6	22.1	21.7333	5.63	4.07	1.24423	0.89947	2.1437	457	124	2016-11-09		27	7	22.9	22.8	5.56	3.84	1.27324	0.87936	2.1526	513	113	2016-11-29		103	4	23.8	22.8667	5.68	4.18	1.35184	0.99484	2.34668	473	132
8	5	28.3	28	3.89	3.57	1.10087	1.01031	2.11118	537	101	2016-11-05		11	6	21.5	21.6	5.2	4.1	1.118	0.8815	1.9995	465	125	2016-11-10		27	7	23.3	23.1	5.77	3.84	1.34441	0.89472	2.23913	483	114	2016-11-30		103	4	21.7	22.4333	5.46	4.23	1.18482	0.91791	2.10273	469	133
8	5	26.9	27.3	3.81	3.6	1.02489	0.9684	1.99329	542	102	2016-11-06		11	6	21.2	21.8	4.7	4.1	0.9964	0.8692	1.8656	490	126	2016-11-11		27	7	23.1	23.5333			0	0	0	498	115	2016-12-01		103	4	21.8	22.0667			0	0	0	478	134
8	5	26.7	26.7333	4.19	3.63	1.11873	0.96921	2.08794	537	103	2016-11-07		11	6	22.7	22.2	5.42	4.15	1.23034	0.94205	2.17239	458	127	2016-11-12		27	7	24.2	24.0667	6.13	3.87	1.48346	0.93654	2.42	492	116	2016-12-02		103	4	22.7	22.2	5.93	4.01	1.34611	0.91027	2.25638	478	135
8	5	26.6	26.8	4.44	3.67	1.18104	0.97622	2.15726	541	104	2016-11-08		11	6	22.7	22.7333	5.75	4.15	1.30525	0.94205	2.2473	459	128	2016-11-13		27	7	24.9	24.7	6.19	3.93	1.54131	0.97857	2.51988	481	117	2016-12-03		103	4	22.1	22.1333	5.74	4.03	1.26854	0.89063	2.15917	473	136
8	5	27.1	26.5667	4.6	3.7	1.2466	1.0027	2.2493	549	105	2016-11-09		11	6	22.8	22.9333	5.57	4.24	1.26996	0.96672	2.23668	460	129	2016-11-14		27	7	25	25.3333	5.85	3.94	1.4625	0.985	2.4475	495	118	2016-12-04		103	4	21.6	22.1667	5.6	4.05	1.2096	0.8748	2.0844	469	137
8	5	26	26.2667	4.3	3.76	1.118	0.9776	2.0956	555	106	2016-11-10		11	6	23.3	22.5667	6.37	4.31	1.48421	1.00423	2.48844	461	130	2016-11-15		27	7	26.1	24.7333	5.7	3.98	1.4877	1.03878	2.52648	480	119	2016-12-05		103	4	22.8	22.3	5.66	4.05	1.29048	0.9234	2.21388	475	138
8	5	25.7	26.2667	4.39	3.75	1.12823	0.96375	2.09198	546	107	2016-11-11		11	6	21.6	22.3667	5.68	4.3	1.22688	0.9288	2.15568	507	131	2016-11-16		27	7	23.1	24.1667	5.88	4.04	1.35828	0.93324	2.29152	481	120	2016-12-06		103	4	22.5	22.4333	6.01	4.06	1.35225	0.9135	2.26575	544	139
8	5	27.1	26.8	4.47	3.72	1.21137	1.00812	2.21949	555	108	2016-11-12		11	6	22.2	21.7667	6.14	4.34	1.36308	0.96348	2.32656	463	132	2016-11-17		27	7	23.3	23.4333	5.76	3.98	1.34208	0.92734	2.26942	478	121	2016-12-07		103	4	22	22	5.9	4.07	1.298	0.8954	2.1934	469	140
8	5	27.6	27.6	4.48	3.8	1.23648	1.0488	2.28528	546	109	2016-11-13		11	6	21.5	21.2	6.41	4.33	1.37815	0.93095	2.3091	465	133	2016-11-18		27	7	23.9	24.0333	5.61	3.95	1.34079	0.94405	2.28484	489	122	2016-12-08		103	4	21.5	21.2	5.67	4.06	1.21905	0.8729	2.09195	470	141
8	5	28.1	27.3667	4.48	3.85	1.25888	1.08185	2.34073	554	110	2016-11-14		11	6	19.9	21	5.72	4.35	1.13828	0.86565	2.00393	458	134	2016-11-19		27	7	24.9	24.5667	5.85	3.92	1.45665	0.97608	2.43273	479	123	2016-12-09		103	4	20.1	20.1667	5.74	4.1	1.15374	0.8241	1.97784	485	142
8	5	26.4	27.1667	4.17	3.9	1.10088	1.0296	2.13048	549	111	2016-11-15		11	6	21.6	20.9333	6.7	4.35	1.4472	0.9396	2.3868	467	135	2016-11-20		27	7	24.9	24.2667	6.04	3.91	1.50396	0.97359	2.47755	502	124	2016-12-10		103	4	18.9	19.2667	6.13	4.09	1.15857	0.77301	1.93158	467	143
8	5	27	26.9	4.42	3.96	1.1934	1.0692	2.2626	546	112	2016-11-16		11	6	21.3	21.5333	6.3	4.33	1.3419	0.92229	2.26419	466	136	2016-11-21		27	7	23	23.6667	6.05	3.97	1.3915	0.9131	2.3046	483	125	2016-12-11		103	4	18.8	19.1	5.78	4.06	1.08664	0.76328	1.84992	460	144
8	5	27.3	26.8333	4.15	3.94	1.13295	1.07562	2.20857	541	113	2016-11-17		11	6	21.7	21.0333	6.6	4.38	1.4322	0.95046	2.38266	456	137	2016-11-22		27	7	23.1	23.4667	5.83	3.93	1.34673	0.90783	2.25456	500	126	2016-12-12		103	4	19.6	19.9667	5.37	4.04	1.05252	0.79184	1.84436	464	145
8	5	26.2	26.8667	4.57	3.95	1.19734	1.0349	2.23224	548	114	2016-11-18		11	6	20.1	21	5.92	4.37	1.18992	0.87837	2.06829	462	138	2016-11-23		27	7	24.3	23.8667	5.68	3.89	1.38024	0.94527	2.32551	488	127	2016-12-13		103	4	21.5	20.5667	5.52	4.05	1.1868	0.87075	2.05755	477	146
8	5	27.1	26.4333	4.77	3.94	1.29267	1.06774	2.36041	547	115	2016-11-19		11	6	21.2	21.2667	5.97	4.42	1.26564	0.93704	2.20268	455	139	2016-11-24		27	7	24.2	24.2333	5.92	3.97	1.43264	0.96074	2.39338	499	128	2016-12-14		103	4	20.6	20.8333	5.8	4.1	1.1948	0.8446	2.0394	469	147
8	5	26	26.6667	4.15	4.01	1.079	1.0426	2.1216	524	116	2016-11-20		11	6	22.5	21.6333	5.96	4.31	1.341	0.96975	2.31075	450	140	2016-11-25		27	7	24.2	24.2667	5.77	3.97	1.39634	0.96074	2.35708	483	129	2016-12-15		103	4	20.4	20.6333	5.84	4.11	1.19136	0.83844	2.0298	474	148
8	5	26.9	26.1	4.75	3.97	1.27775	1.06793	2.34568	537	117	2016-11-21		11	6	21.2	20.9	6.25	4.29	1.325	0.90948	2.23448	440	141	2016-11-26		27	7	24.4	24.5667	5.79	3.94	1.41276	0.96136	2.37412	486	130	2016-12-16		103	4	20.9	20.4667	5.67	4.1	1.18503	0.8569	2.04193	463	149
8	5	25.4	25.7333	4.86	4.02	1.23444	1.02108	2.25552	557	118	2016-11-22		11	6	19	20.3667	6.32	4.34	1.2008	0.8246	2.0254	482	142	2016-11-27		27	7	25.1	24.3	5.83	3.92	1.46333	0.98392	2.44725	491	131	2016-12-17		103	4	20.1	20.3	5.37	4.16	1.07937	0.83616	1.91553	468	150
8	5	24.9	24.9667	4.42	4	1.10058	0.996	2.09658	550	119	2016-11-23		11	6	20.9	19.9	7.09	4.3	1.48181	0.8987	2.38051	457	143	2016-11-28		27	7	23.4	23.9667	5.52	3.9	1.29168	0.9126	2.20428	486	132	2016-12-18		103	4	19.9	19.9333	5.68	4.13	1.13032	0.82187	1.95219	465	151
8	5	24.6	25.3667	3.79	4.03	0.93234	0.99138	1.92372	553	120	2016-11-24		11	6	19.8	20	5.98	4.27	1.18404	0.84546	2.0295	456	144	2016-11-29		27	7	23.4	23.0333	5.64	3.88	1.31976	0.90792	2.22768	486	133	2016-12-19		103	4	19.8	19.4	5.75	4.06	1.1385	0.80388	1.94238	468	152
8	5	26.6	25.4333	4.53	3.96	1.20498	1.05336	2.25834	553	121	2016-11-25		11	6	19.3	19.4333	5.8	4.32	1.1194	0.83376	1.95316	451	145	2016-11-30		27	7	22.3	22.5667	5.65	3.83	1.25995	0.85409	2.11404	482	134	2016-12-20		103	4	18.5	19.3	5.93	4.01	1.09705	0.74185	1.8389	468	153
8	5	25.1	25.7	4.64	3.98	1.16464	0.99898	2.16362	554	122	2016-11-26		11	6	19.2	19.3			0	0	0	464	146	2016-12-01		27	7	22	21.8667	5.93	3.79	1.3046	0.8338	2.1384	497	135	2016-12-21		103	4	19.6	18.8333	6.16	3.95	1.20736	0.7742	1.98156	465	154
8	5	25.4	24.9	4.36	3.94	1.10744	1.00076	2.1082	556	123	2016-11-27		11	6	19.4	19.1667	6.25	4.29	1.2125	0.83226	2.04476	455	147	2016-12-02		27	7	21.3	22.2333	5.59	3.74	1.19067	0.79662	1.98729	483	136	2016-12-22		103	4	18.4	19.4667	6.23	3.96	1.14632	0.72864	1.87496	464	155
8	5	24.2	24.7667	4.4	3.99	1.0648	0.96558	2.03038	566	124	2016-11-28		11	6	18.9	19.3667	5.51	4.27	1.04139	0.80703	1.84842	459	148	2016-12-03		27	7	23.4	22.9667	5.6	3.7	1.3104	0.8658	2.1762	483	137	2016-12-23		103	4	20.4	19.7667	5.89	3.97	1.20156	0.80988	2.01144	461	156
8	5	24.7	24.2333	3.45	4.05	0.85215	1.00035	1.8525	552	125	2016-11-29		11	6	19.8	20.5667	5.13	4.28	1.01574	0.84744	1.86318	467	149	2016-12-04		27	7	24.2	24	5.56	3.8	1.34552	0.9196	2.26512	490	138	2016-12-24		103	4	20.5	20.1	5.63	3.97	1.15415	0.81385	1.968	475	157
8	5	23.8	23.9333	3.21	3.9	0.76398	0.9282	1.69218	541	126	2016-11-30		11	6	23	21.2667	6.61	4.27	1.5203	0.9821	2.5024	460	150	2016-12-05		27	7	24.4	24.1667	5.53	3.86	1.34932	0.94184	2.29116	486	139	2016-12-25		103	4	19.4	19.8667	5.73	4.04	1.11162	0.78376	1.89538	474	158
8	5	23.3	23.8			0	0	0	548	127	2016-12-01		11	6	21	20.7333	6.96	4.26	1.4616	0.8946	2.3562	460	151	2016-12-06		27	7	23.9	24.2667	5.18	3.86	1.23802	0.92254	2.16056	503	140	2016-12-26		103	4	19.7	19.6333	6	4.01	1.182	0.78997	1.97197	475	159
8	5	24.3	24.1	4.8	3.9	1.1664	0.9477	2.1141	552	128	2016-12-02		11	6	18.2	20.6333	5.8	4.25	1.0556	0.7735	1.8291	497	152	2016-12-07		27	7	24.5	24.7333	5.19	3.81	1.27155	0.93345	2.205	483	141	2016-12-27		103	4	19.8	19.4667	5.62	3.97	1.11276	0.78606	1.89882	469	160
8	5	24.7	24.5333	4.54	3.9	1.12138	0.9633	2.08468	562	129	2016-12-03		11	6	22.7	20.3667	6.67	4.26	1.51409	0.96702	2.48111	514	153	2016-12-08		27	7	25.8	25.0333	5.28	3.71	1.36224	0.95718	2.31942	484	142	2016-12-28		103	4	18.9	19.3667	5.43	3.97	1.02627	0.75033	1.7766	469	161
8	5	24.6	24.7667	4.7	3.86	1.1562	0.94956	2.10576	556	130	2016-12-04		11	6	20.2	20.7667	6.72	4.2	1.35744	0.8484	2.20584	468	154	2016-12-09		27	7	24.8	25	5.4	3.75	1.3392	0.93	2.2692	495	143	2016-12-29		103	4	19.4	19.3667	5.29	3.97	1.02626	0.77018	1.79644	465	162
8	5	25	24.2333	5.35	3.74	1.3375	0.935	2.2725	559	131	2016-12-05		11	6	19.4	19.5	6.28	4.25	1.21832	0.8245	2.04282	504	155	2016-12-10		27	7	24.4	24.8667	5.55	3.8	1.3542	0.9272	2.2814	485	144	2016-12-30		103	4	19.8	19.6333	5.29	3.98	1.04742	0.78804	1.83546	472	163
8	5	23.1	24.1333	5.05	3.93	1.16655	0.90783	2.07438	560	132	2016-12-06		11	6	18.9	18.8667	6.67	4.32	1.26063	0.81648	2.07711	466	156	2016-12-11		27	7	25.4	24.9667	5.5	3.79	1.397	0.96266	2.35966	485	145	2016-12-31		103	4	19.7	19.6	5.73	3.99	1.12881	0.78603	1.91484	471	164
8	5	24.3	23.3667	5.28	3.87	1.28304	0.94041	2.22345	556	133	2016-12-07		11	6	18.3	19.3667	6.11	4.31	1.11813	0.78873	1.90686	466	157	2016-12-12		27	7	25.1	25.4667	5.45	3.79	1.36795	0.95129	2.31924	494	146	2017-01-01		103	4	19.3	19.9333	5.81	3.98	1.12133	0.76814	1.88947	465	165
8	5	22.7	23.6667	5.83	3.84	1.32341	0.87168	2.19509	565	134	2016-12-08		11	6	20.9	19.5333	6.29	4.28	1.31461	0.89452	2.20913	469	158	2016-12-13		27	7	25.9	25.1667	5.45	3.84	1.41155	0.99456	2.40611	485	147	2017-01-02		103	4	20.8	19.5	5.41	3.95	1.12528	0.8216	1.94688	474	166
8	5	24	23.3	5.48	3.86	1.3152	0.9264	2.2416	552	135	2016-12-09		11	6	19.4	19.7333	6.2	4.29	1.2028	0.83226	2.03506	468	159	2016-12-14		27	7	24.5	24.6	5.31	3.81	1.30095	0.93345	2.2344	487	148	2017-01-03		103	4	18.4	19.9	5.49	3.95	1.01016	0.7268	1.73696	470	167
8	5	23.2	23.4333	5.42	3.89	1.25744	0.90248	2.15992	557	136	2016-12-10		11	6	18.9	18.8667	6.49	4.34	1.22661	0.82026	2.04687	466	160	2016-12-15		27	7	23.4	23.6333	5.16	3.79	1.20744	0.88686	2.0943	492	149	2017-01-04		103	4	20.5	19.5667	5.5	3.97	1.1275	0.81385	1.94135	471	168
8	5	23.1	22.9333	5.27	3.94	1.21737	0.91014	2.12751	578	137	2016-12-11		11	6	18.3	18.1333	6.38	4.33	1.16754	0.79239	1.95993	455	161	2016-12-16		27	7	23	23.6667	5.6	3.8	1.288	0.874	2.162	481	150	2017-01-05		103	4	19.8	20.1667	5.59	3.97	1.10682	0.78606	1.89288	483	169
8	5	22.5	23.3	5.57	3.85	1.25325	0.86625	2.1195	559	138	2016-12-12		11	6	17.2	18.1333	6.63	4.31	1.14036	0.74132	1.88168	440	162	2016-12-17		27	7	24.6	24.0667	5.57	3.75	1.37022	0.9225	2.29272	490	151	2017-01-06		103	4	20.2	19.9	5.63	3.96	1.13726	0.79992	1.93718	484	170
8	5	24.3	23.3333	5.13	3.83	1.24659	0.93069	2.17728	552	139	2016-12-13		11	6	18.9	18.2333	6.96	4.29	1.31544	0.81081	2.12625	447	163	2016-12-18		27	7	24.6	24.7333	5.73	3.74	1.40958	0.92004	2.32962	481	152	2017-01-07		103	4	19.7	19.7333	5.41	3.99	1.06577	0.78603	1.8518	508	171
8	5	23.2	23.1	4.83	3.86	1.12056	0.89552	2.01608	562	140	2016-12-14		11	6	18.6	18.1667	6.84	4.26	1.27224	0.79236	2.0646	472	164	2016-12-19		27	7	25	24.6667	5.5	3.79	1.375	0.9475	2.3225	489	153	2017-01-08		103	4	19.3	19.7667	5.32	4	1.02676	0.772	1.79876	464	172
8	5	21.8	22.3667	5.22	3.83	1.13796	0.83494	1.9729	560	141	2016-12-15		11	6	17	17.6333	6.72	4.26	1.1424	0.7242	1.8666	459	165	2016-12-20		27	7	24.4	24.4667	5.72	3.82	1.39568	0.93208	2.32776	484	154	2017-01-09		103	4	20.3	20.0333	5.6	4.01	1.1368	0.81403	1.95083	472	173
8	5	22.1	22.0333	4.65	3.89	1.02765	0.85969	1.88734	561	142	2016-12-16		11	6	17.3	17.5667	6.65	4.17	1.15045	0.72141	1.87186	458	166	2016-12-21		27	7	24	24.1	5.57	3.81	1.3368	0.9144	2.2512	545	155	2017-01-10		103	4	20.5	20.5667	5.5	3.99	1.1275	0.81795	1.94545	466	174
8	5	22.2	22.3333	5.09	3.86	1.12998	0.85692	1.9869	569	143	2016-12-17		11	6	18.4	18.5333	5.65	4.07	1.0396	0.74888	1.78848	462	167	2016-12-22		27	7	23.9	24.6333	5.49	3.78	1.31211	0.90342	2.21553	496	156	2017-01-11		103	4	20.9	20.8	5.35	3.99	1.11815	0.83391	1.95206	483	175
8	5	22.7	22.5	5.26	3.85	1.19402	0.87395	2.06797	565	144	2016-12-18		11	6	19.9	18.8667	5.02	4	0.99898	0.796	1.79498	463	168	2016-12-23		27	7	26	25	5.29	3.78	1.3754	0.9828	2.3582	493	157	2017-01-12		103	4	21	20.3	5.59	4.04	1.1739	0.8484	2.0223	474	176
8	5	22.6	21.6333	5.17	3.85	1.16842	0.8701	2.03852	563	145	2016-12-19		11	6	18.3	20.6333	4.64	4.03	0.84912	0.73749	1.58661	467	169	2016-12-24		27	7	25.1	25.3	5.55	3.79	1.39305	0.95129	2.34434	485	158	2017-01-13		103	4	19	19.4667	5.56	4.1	1.0564	0.779	1.8354	473	177
8	5	19.6	20.6333	5.05	3.94	0.9898	0.77224	1.76204	544	146	2016-12-20		11	6	23.7	20.3667	4.71	4.02	1.11627	0.95274	2.06901	460	170	2016-12-25		27	7	24.8	25.1333	5.48	3.78	1.35904	0.93744	2.29648	489	159	2017-01-14		103	4	18.4	19.1667	5.52	4.1	1.01568	0.7544	1.77008	471	178
8	5	19.7	19.3	5.52	3.89	1.08744	0.76633	1.85377	554	147	2016-12-21		11	6	19.1	20.7333	5.59	4.04	1.06769	0.77164	1.83933	464	171	2016-12-26		27	7	25.5	25.2667	5.4	3.79	1.377	0.96645	2.34345	503	160	2017-01-15		103	4	20.1	19.4667	5.61	4.03	1.12761	0.81003	1.93764	483	179
8	5	18.6	20.3	4.99	3.82	0.92814	0.71052	1.63866	558	148	2016-12-22		11	6	19.4	19.6333	5.73	4.02	1.11162	0.77988	1.8915	472	172	2016-12-27		27	7	25.5	25.7333	5.55	3.83	1.41525	0.97665	2.3919	486	161	2017-01-16		103	4	19.9	20.1333	5.53	4.04	1.10047	0.80396	1.90443	470	180
8	5	22.6	21.3	4.92	3.64	1.11192	0.82264	1.93456	568	149	2016-12-23		11	6	20.4	20.3	5.2	4	1.0608	0.816	1.8768	468	173	2016-12-28		27	7	26.2	25.9667	5.45	3.86	1.4279	1.01132	2.43922	492	162	2017-01-17		103	4	20.4	20.6	5.78	4.04	1.17912	0.82416	2.00328	484	181
8	5	22.7	22.6667	4.79	3.61	1.08733	0.81947	1.9068	569	150	2016-12-24		11	6	21.1	20.6333	5.22	4.07	1.10142	0.85877	1.96019	477	174	2016-12-29		27	7	26.2	25.7333	5.47	3.88	1.43314	1.01656	2.4497	488	163	2017-01-18		103	4	21.5	21.3333	5.9	4.03	1.2685	0.86645	2.13495	477	182
8	5	22.7	23	4.59	3.65	1.04193	0.82855	1.87048	570	151	2016-12-25		11	6	20.4	20.8333	5.27	4.11	1.07508	0.83844	1.91352	477	175	2016-12-30		27	7	24.8	25.8333	5.66	3.9	1.40368	0.9672	2.37088	478	164	2017-01-19		103	4	22.1	22	5.39	4.11	1.19119	0.90831	2.0995	477	183
8	5	23.6	23.1333	4.41	3.58	1.04076	0.84488	1.88564	575	152	2016-12-26		11	6	21	21.2	5.19	4.12	1.0899	0.8652	1.9551	465	176	2016-12-31		27	7	26.5	26.1	5.67	3.85	1.50255	1.02025	2.5228	495	165	2017-01-20		103	4	22.4	22.7	5.39	4.14	1.20736	0.92736	2.13472	470	184
8	5	23.1	23.4667	4.41	3.61	1.01871	0.83391	1.85262	556	153	2016-12-27		11	6	22.2	20.1667	5.42	4.13	1.20324	0.91686	2.1201	476	177	2017-01-01		27	7	27	26.2333	5.48	3.83	1.4796	1.0341	2.5137	498	166	2017-01-21		103	4	23.6	22.9667	5.41	4.12	1.27676	0.97232	2.24908	485	185
8	5	23.7	23.5333	4.38	3.65	1.03806	0.86505	1.90311	563	154	2016-12-28		11	6	17.3	20.2667	5.31	4.14	0.91863	0.71622	1.63485	464	178	2017-01-02		27	7	25.2	26.2	5.54	3.93	1.39608	0.99036	2.38644	493	167	2017-01-22		103	4	22.9	22.9	5.44	4.13	1.24576	0.94577	2.19153	474	186
8	5	23.8	23.8333	4.53	3.55	1.07814	0.8449	1.92304	562	155	2016-12-29		11	6	21.3	19.9	5.82	4.11	1.23966	0.87543	2.11509	473	179	2017-01-03		27	7	26.4	26.2	5.83	3.91	1.53912	1.03224	2.57136	483	168	2017-01-23		103	4	22.2	22.5333	5.42	4.16	1.20324	0.92352	2.12676	479	187
8	5	24	23.9667	4.52	3.55	1.0848	0.852	1.9368	559	156	2016-12-30		11	6	21.1	21.1	5.67	4.02	1.19637	0.84822	2.04459	474	180	2017-01-04		27	7	27	26.6333	5.66	3.85	1.5282	1.0395	2.5677	475	169	2017-01-24		103	4	22.5	22.3333	5.59	4.09	1.25775	0.92025	2.178	476	188
8	5	24.1	23.6	4.45	3.64	1.07245	0.87724	1.94969	578	157	2016-12-31		11	6	20.9	21.2667	5.39	4.1	1.12651	0.8569	1.98341	470	181	2017-01-05		27	7	26.5	26.6667	5.3	3.9	1.4045	1.0335	2.438	482	170	2017-01-25		103	4	22.3	22.5667	5.9	4.06	1.3157	0.90538	2.22108	473	189
8	5	22.7	23.3	4.51	3.63	1.02377	0.82401	1.84778	578	158	2017-01-01		11	6	21.8	18.0333	5.67	4.14	1.23606	0.90252	2.13858	463	182	2017-01-06		27	7	26.5	25.9	5.46	3.86	1.4469	1.0229	2.4698	488	171	2017-01-26		103	4	22.9	22.7667	5.76	4.03	1.31904	0.92287	2.24191	487	190
8	5	23.1	22.9333	4.44	3.66	1.02564	0.84546	1.8711	574	159	2017-01-02		11	6	11.4	18.2667	3.86	4.21	0.44004	0.47994	0.91998	445	183	2017-01-07		27	7	24.7	25.4333	5.63	3.82	1.39061	0.94354	2.33415	491	172	2017-01-27		103	4	23.1	23.0333	5.7	4.01	1.3167	0.92631	2.24301	482	191
8	5	23	23.1333	4.49	3.66	1.0327	0.8418	1.8745	569	160	2017-01-03		11	6	21.6	17.4	4.97	4.23	1.07352	0.91368	1.9872	461	184	2017-01-08		27	7	25.1	24.8	5.32	3.76	1.33532	0.94376	2.27908	476	173	2017-01-28		103	4	23.1	22.8	5.66	4.02	1.30746	0.92862	2.23608	493	192
8	5	23.3	22.8333	4.46	3.74	1.03918	0.87142	1.9106	575	161	2017-01-04		11	6	19.2	20	6.7	4	1.2864	0.768	2.0544	467	185	2017-01-09		27	7	24.6	27.0667	4.7	3.72	1.1562	0.91512	2.07132	481	174	2017-01-29		103	4	22.2	22.2667	5.91	4.02	1.31202	0.89244	2.20446	484	193
8	5	22.2	23	4.3	3.71	0.9546	0.82362	1.77822	571	162	2017-01-05		11	6	19.2	19.5	5.44	3.92	1.04448	0.75264	1.79712	461	186	2017-01-10		27	7	31.5	26.6	4.93	3.75	1.55295	1.18125	2.7342	482	175	2017-01-30		103	4	21.5	21.8333	5.78	4.03	1.2427	0.86645	2.10915	473	194
8	5	23.5	22.7	4.18	3.68	0.9823	0.8648	1.8471	572	163	2017-01-06		11	6	20.1	19.4667	4.99	4.03	1.00299	0.81003	1.81302	460	187	2017-01-11		27	7	23.7	26.9667	5.1	3.67	1.2087	0.86979	2.07849	486	176	2017-01-31		103	4	21.8	22.3333	5.66	4.04	1.23388	0.88072	2.1146	489	195
8	5	22.4	23.0333	4.64	3.75	1.03936	0.84	1.87936	575	164	2017-01-07		11	6	19.1	19.8333	5.44	4.07	1.03904	0.77737	1.81641	454	188	2017-01-12		27	7	25.7	24.9333	4.71	3.63	1.21047	0.93291	2.14338	482	177	2017-02-01		103	4	23.7	22.9333	5.7	3.98	1.3509	0.94326	2.29416	480	196
8	5	23.2	23.1	4.99	3.79	1.15768	0.87928	2.03696	573	165	2017-01-08		11	6	20.3	20.4	5.35	4	1.08605	0.812	1.89805	449	189	2017-01-13		27	7	25.4	26.0333	4.53	3.64	1.15062	0.92456	2.07518	492	178	2017-02-02		103	4	23.3	23.2	5.48	3.98	1.27684	0.92734	2.20418	490	197
8	5	23.7	23.7	4.62	3.7	1.09494	0.8769	1.97184	575	166	2017-01-09		11	6	21.8	21.0667	5.23	3.98	1.14014	0.86764	2.00778	459	190	2017-01-14		27	7	27	26.1333	4.66	3.66	1.2582	0.9882	2.2464	565	179	2017-02-03		103	4	22.6	22.8333	5.6	4.04	1.2656	0.91304	2.17864	480	198
8	5	24.2	24.2	4.51	3.73	1.09142	0.90266	1.99408	578	167	2017-01-10		11	6	21.1	21.6333	5.59	4.16	1.17949	0.87776	2.05725	464	191	2017-01-15		27	7	26	26.0333	4.42	3.7	1.1492	0.962	2.1112	492	180	2017-02-04		103	4	22.6	23.1333	5.66	4.05	1.27916	0.9153	2.19446	481	199
8	5	24.7	24.2	4.66	3.68	1.15102	0.90896	2.05998	586	168	2017-01-11		11	6	22	21.5667	6.01	4.22	1.3222	0.9284	2.2506	477	192	2017-01-16		27	7	25.1	25.8333	4.44	3.67	1.11444	0.92117	2.03561	493	181	2017-02-05		103	4	24.2	23.5	5.44	4.03	1.31648	0.97526	2.29174	474	200
8	5	23.7	24.2	4.43	3.74	1.04991	0.88638	1.93629	579	169	2017-01-12		11	6	21.6	21.2667	5.83	4.21	1.25928	0.90936	2.16864	472	193	2017-01-17		27	7	26.4	25.7667	4.52	3.66	1.19328	0.96624	2.15952	501	182	2017-02-06		103	4	23.7	23.9333	5.41	4	1.28217	0.948	2.23017	472	201
8	5	24.2	23.9667	4.52	3.79	1.09384	0.91718	2.01102	582	170	2017-01-13		11	6	20.2	20.4667	5.77	4.24	1.16554	0.85648	2.02202	469	194	2017-01-18		27	7	25.8	26.3667	4.45	3.68	1.1481	0.94944	2.09754	490	183	2017-02-07		103	4	23.9	23.7667	5.33	3.99	1.27387	0.95361	2.22748	482	202
8	5	24	24.3	4.53	3.68	1.0872	0.8832	1.9704	586	171	2017-01-14		11	6	19.6	19.5333	5.84	4.24	1.14464	0.83104	1.97568	473	195	2017-01-19		27	7	26.9	26.8	4.7	3.67	1.2643	0.98723	2.25153	499	184	2017-02-08		103	4	23.7	23.6	5.34	4	1.26558	0.948	2.21358	480	203
8	5	24.7	24.2667	4.72	3.74	1.16584	0.92378	2.08962	582	172	2017-01-15		11	6	18.8	19.3	5.91	4.2	1.11108	0.7896	1.90068	478	196	2017-01-20		27	7	27.7	24.6333	4.91	3.66	1.36007	1.01382	2.37389	483	185	2017-02-09		103	4	23.2	23.3333	5.51	3.99	1.27832	0.92568	2.204	479	204
8	5	24.1	24.3	4.7	3.83	1.1327	0.92303	2.05573	581	173	2017-01-16		11	6	19.5	19.7667	5.74	4.13	1.1193	0.80535	1.92465	469	197	2017-01-21		27	7	19.3	22.7667	5.45	3.81	1.05185	0.73533	1.78718	462	186	2017-02-10		103	4	23.1	22.7667	5.37	4.01	1.24047	0.92631	2.16678	495	205
8	5	24.1	24.1333	4.7	3.78	1.1327	0.91098	2.04368	575	174	2017-01-17		11	6	21	20.3667	5.83	4.19	1.2243	0.8799	2.1042	459	198	2017-01-22		27	7	21.3	21.6667	5.31	3.72	1.13103	0.79236	1.92339	486	187	2017-02-11		103	4	22	22.5	5.58	4	1.2276	0.88	2.1076	470	206
8	5	24.2	23.9667	4.61	3.72	1.11562	0.90024	2.01586	564	175	2017-01-18		11	6	20.6	20.9	5.6	4.2	1.1536	0.8652	2.0188	463	199	2017-01-23		27	7	24.4	23.8333	5.1	3.46	1.2444	0.84424	2.08864	493	188	2017-02-12		103	4	22.4	22.2667	5.44	4.01	1.21856	0.89824	2.1168	495	207
8	5	23.6	24.0333	4.54	3.73	1.07144	0.88028	1.95172	573	176	2017-01-19		11	6	21.1	20.9667	5.65	4.17	1.19215	0.87987	2.07202	471	200	2017-01-24		27	7	25.8	25.3	5.28	3.58	1.36224	0.92364	2.28588	494	189	2017-02-13		103	4	22.4	22.5333	5.65	4.02	1.2656	0.90048	2.16608	477	208
8	5	24.3	24.2667	4.55	3.67	1.10565	0.89181	1.99746	579	177	2017-01-20		11	6	21.2	21.6	5.29	4.19	1.12148	0.88828	2.00976	466	201	2017-01-25		27	7	25.7	25.9333	5.26	3.69	1.35182	0.94833	2.30015	497	190	2017-02-14		103	4	22.8	22.4667	5.65	4	1.2882	0.912	2.2002	486	209
8	5	24.9	24.3	4.63	3.66	1.15287	0.91134	2.06421	589	178	2017-01-21		11	6	22.5	21.8333	5.5	4.17	1.2375	0.93825	2.17575	468	202	2017-01-26		27	7	26.3	25.6333	5	3.73	1.315	0.98099	2.29599	497	191	2017-02-15		103	4	22.2	22.3333	5.54	4.02	1.22988	0.89244	2.12232	483	210
8	5	23.7	24.4	4.43	3.77	1.04991	0.89349	1.9434	576	179	2017-01-22		11	6	21.8	21.7333	5.41	4.14	1.17938	0.90252	2.0819	471	203	2017-01-27		27	7	24.9	25	4.71	3.73	1.17279	0.92877	2.10156	513	192	2017-02-16		103	4	22	21.7333	5.78	4.03	1.2716	0.8866	2.1582	491	211
8	5	24.6	24.5333	4.67	3.75	1.14882	0.9225	2.07132	586	180	2017-01-23		11	6	20.9	20.5333	5.57	4.16	1.16413	0.86944	2.03357	460	204	2017-01-28		27	7	23.8	24.6667	4.65	3.68	1.1067	0.87584	1.98254	489	193	2017-02-17		103	4	21	21.4333	5.66	4.05	1.1886	0.8505	2.0391	488	212
8	5	25.3	25.2	4.56	3.71	1.15368	0.93863	2.09231	587	181	2017-01-24		11	6	18.9	20.9667	4.73	4.13	0.89397	0.78057	1.67454	434	205	2017-01-29		27	7	25.3	24.8667	4.59	3.6	1.16127	0.9108	2.07207	506	194	2017-02-18		103	4	21.3	21.2333	5.59	4	1.19067	0.852	2.04267	520	213
8	5	25.7	24.9667	4.58	3.79	1.17706	0.97403	2.15109	570	182	2017-01-25		11	6	23.1	20.9667	4.71	4.07	1.08801	0.94017	2.02818	443	206	2017-01-30		27	7	25.5	25.1667	4.65	3.61	1.18575	0.92055	2.1063	522	195	2017-02-19		103	4	21.4	21.5333	5.72	3.93	1.22408	0.84102	2.0651	495	214
8	5	23.9	23.9333	4.96	3.88	1.18544	0.92732	2.11276	588	183	2017-01-26		11	6	20.9	21.7	6.04	4.02	1.26236	0.84018	2.10254	464	207	2017-01-31		27	7	24.7	24.7667	4.89	3.7	1.20783	0.9139	2.12173	516	196	2017-02-20		103	4	21.9	21.7333	5.72	3.93	1.25268	0.86067	2.11335	499	215
8	5	22.2	23.3667	4.76	3.91	1.05672	0.86802	1.92474	570	184	2017-01-27		11	6	21.1	20.9667	5.76	4.03	1.21536	0.85033	2.06569	462	208	2017-02-01		27	7	24.1	24.3	5.08	3.74	1.22428	0.90134	2.12562	500	197	2017-02-21		103	4	21.9	21.9	5.99	3.98	1.31181	0.87162	2.18343	495	216
8	5	24	24.2333	4.33	3.7	1.0392	0.888	1.9272	587	185	2017-01-28		11	6	20.9	21.5333	5.18	3.99	1.08262	0.83391	1.91653	461	209	2017-02-02		27	7	24.1	24.2333	4.9	3.74	1.1809	0.90134	2.08224	496	198	2017-02-22		103	4	21.9	20.7667	5.84	4.01	1.27896	0.87819	2.15715	497	217
8	5	26.5	25.5333	4.62	3.6	1.2243	0.954	2.1783	578	186	2017-01-29		11	6	22.6	22.6333	4.81	4	1.08706	0.904	1.99106	467	210	2017-02-03		27	7	24.5	24.4667	4.89	3.71	1.19805	0.90895	2.107	505	199	2017-02-23		103	4	18.5	19.8667	6.23	4.03	1.15255	0.74555	1.8981	491	218
8	5	26.1	26.4333	4.64	3.62	1.21104	0.94482	2.15586	579	187	2017-01-30		11	6	24.4	23.7667	5.38	4.01	1.31272	0.97844	2.29116	507	211	2017-02-04		27	7	24.8	24.0333	4.64	3.7	1.15072	0.9176	2.06832	488	200	2017-02-24		103	4	19.2	19.9667	6.17	4.03	1.18464	0.77376	1.9584	505	219
8	5	26.7	26.4333	4.76	3.7	1.27092	0.9879	2.25882	579	188	2017-01-31		11	6	24.3	24.6333	5.16	4.07	1.25388	0.98901	2.24289	469	212	2017-02-05		27	7	22.8	23.6667	4.61	3.63	1.05108	0.82764	1.87872	483	201	2017-02-25		103	4	22.2	21.4333	6.45	3.98	1.4319	0.88356	2.31546	488	220
8	5	26.5	26.3333	4.47	3.75	1.18455	0.99375	2.1783	584	189	2017-02-01		11	6	25.2	24.4667	5.21	4.12	1.31292	1.03824	2.35116	473	213	2017-02-06		27	7	23.4	24.0333	4.73	3.58	1.10682	0.83772	1.94454	495	202	2017-02-26		103	4	22.9	22.6667	6.33	3.95	1.44957	0.90455	2.35412	482	221
8	5	25.8	26.0667	4.44	3.7	1.14552	0.9546	2.10012	584	190	2017-02-02		11	6	23.9	24.5667	5.14	4.11	1.22846	0.98229	2.21075	466	214	2017-02-07		27	7	25.9	24.9	4.91	3.71	1.27169	0.96089	2.23258	498	203	2017-02-27		103	4	22.9	23	5.6	4.14	1.2824	0.94806	2.23046	482	222
8	5	25.9	25.9333	4.47	3.72	1.15773	0.96348	2.12121	579	191	2017-02-03		11	6	24.6	24.0667	5.19	4.04	1.27674	0.99384	2.27058	463	215	2017-02-08		27	7	25.4	25.5	5.01	3.92	1.27254	0.99568	2.26822	501	204	2017-02-28		103	4	23.2	21.9333	5.41	4.22	1.25512	0.97904	2.23416	498	223
8	5	26.1	25.6667	4.51	3.72	1.17711	0.97092	2.14803	584	192	2017-02-04		11	6	23.7	24.1	5.31	4.02	1.25847	0.95274	2.21121	456	216	2017-02-09		27	7	25.2	25.2	5.55	4.07	1.3986	1.02564	2.42424	496	205	2017-03-01		103	4	19.7	20.8	5.58	4.32	1.09926	0.85104	1.9503	499	224
8	5	25	25.8	4.65	3.76	1.1625	0.94	2.1025	565	193	2017-02-05		11	6	24	24	5.15	4.05	1.236	0.972	2.208	457	217	2017-02-10		27	7	25	25.0667	5.94	4.1	1.485	1.025	2.51	502	206	2017-03-02		103	4	19.5	19.9667	5.66	4.36	1.1037	0.8502	1.9539	487	225
8	5	26.3	25.4333	4.68	3.73	1.23084	0.98099	2.21183	576	194	2017-02-06		11	6	24.3	23.5667	5.32	4	1.29276	0.972	2.26476	471	218	2017-02-11		27	7	25	24.7	5.46	4.13	1.365	1.0325	2.3975	504	207	2017-03-03		103	4	20.7	19.9667	5.58	4.35	1.15506	0.90045	2.05551	470	226
8	5	25	25.3667	4.41	3.76	1.1025	0.94	2.0425	589	195	2017-02-07		11	6	22.4	23.1667	5.19	4.09	1.16256	0.91616	2.07872	469	219	2017-02-12		27	7	24.1	24.5	5.22	4.18	1.25802	1.00738	2.2654	515	208	2017-03-04		103	4	19.7	17.9	5.67	4.37	1.11699	0.86089	1.97788	503	227
8	5	24.8	25.0667	4.49	3.71	1.11352	0.92008	2.0336	589	196	2017-02-08		11	6	22.8	22.8	5.25	4.04	1.197	0.92112	2.11812	466	220	2017-02-13		27	7	24.4	24.6333	5.36	4.18	1.30784	1.01992	2.32776	506	209	2017-03-05		103	4	13.3	15.6333	5.87	4.34	0.78071	0.57722	1.35793	495	228
8	5	25.4	25.3667	4.55	3.69	1.1557	0.93726	2.09296	587	197	2017-02-09		11	6	23.2	22.5333	5.41	3.96	1.25512	0.91872	2.17384	465	221	2017-02-14		27	7	25.4	24.6	5.44	4.17	1.38176	1.05918	2.44094	519	210	2017-03-06		103	4	13.9	15.9667	6.31	4.41	0.87709	0.61299	1.49008	498	229
8	5	25.9	25.7667	4.41	3.71	1.14219	0.96089	2.10308	582	198	2017-02-10		11	6	21.6	22.8333	5.17	3.92	1.11672	0.84672	1.96344	464	222	2017-02-15		27	7	24	24.5333	5.4	4.2	1.296	1.008	2.304	499	211	2017-03-07		103	4	20.7	18.8333	6.47	4.34	1.33929	0.89838	2.23767	485	230
8	5	26	25.7	4.5	3.7	1.17	0.962	2.132	593	199	2017-02-11		11	6	23.7	22.7333	5.3	3.95	1.2561	0.93615	2.19225	467	223	2017-02-16		27	7	24.2	23.9333	5.23	4.21	1.26566	1.01882	2.28448	506	212	2017-03-08		103	4	21.9	21.9	6.5	4.3	1.4235	0.9417	2.3652	528	231
8	5	25.2	24.8667	4.41	3.64	1.11132	0.91728	2.0286	599	200	2017-02-12		11	6	22.9	23	5.46	4	1.25034	0.916	2.16634	465	224	2017-02-17		27	7	23.6	24.1667	5.51	4.19	1.30036	0.98884	2.2892	519	213	2017-03-09		103	4	23.1	22.4	6.35	4.24	1.46685	0.97944	2.44629	490	232
8	5	23.4	24.4	4.48	3.76	1.04832	0.87984	1.92816	580	201	2017-02-13		11	6	22.4	22.4667	5.36	4.04	1.20064	0.90496	2.1056	465	225	2017-02-18		27	7	24.7	21.6333	5.57	4.16	1.37579	1.02752	2.40331	503	214	2017-03-10		103	4	22.2	22.5333	6.15	4.29	1.3653	0.95238	2.31768	491	233
8	5	24.6	24.4	4.79	3.67	1.17834	0.90282	2.08116	594	202	2017-02-14		11	6	22.1	21.9	4.83	3.97	1.06743	0.87737	1.9448	475	226	2017-02-19		27	7	16.6	19.1	5.36	4.21	0.88976	0.69886	1.58862	510	215	2017-03-11		103	4	22.3	22.3	5.7	4.33	1.2711	0.96559	2.23669	505	234
8	5	25.2	24.8667	4.57	3.61	1.15164	0.90972	2.06136	578	203	2017-02-15		11	6	21.2	21.5	5.51	4.02	1.16812	0.85224	2.02036	468	227	2017-02-20		27	7	16	16.3667	5.96	4.29	0.9536	0.6864	1.64	480	216	2017-03-12		103	4	22.4	21.6333	6.35	4.33	1.4224	0.96992	2.39232	491	235
8	5	24.8	24.7667	4.54	3.69	1.12592	0.91512	2.04104	590	204	2017-02-16		11	6	21.2	21.3	5.65	4.03	1.1978	0.85436	2.05216	468	228	2017-02-21		27	7	16.5	16.7	6.16	4.38	1.0164	0.7227	1.7391	488	217	2017-03-13		103	4	20.2	21.5333	6.52	4.35	1.31704	0.8787	2.19574	495	236
8	5	24.3	24.3	4.8	3.75	1.1664	0.91125	2.07765	607	205	2017-02-17		11	6	21.5	21.2333	5.69	3.99	1.22335	0.85785	2.0812	470	229	2017-02-22		27	7	17.6	17.9	6.04	4.3	1.06304	0.7568	1.81984	523	218	2017-03-14		103	4	22	21.6333	5.83	4.35	1.2826	0.957	2.2396	483	237
8	5	23.8	23.9333	4.62	3.76	1.09956	0.89488	1.99444	598	206	2017-02-18		11	6	21	20.7	5.94	3.99	1.2474	0.8379	2.0853	467	230	2017-02-23		27	7	19.6	17.7667	5.66	4.18	1.10936	0.81928	1.92864	500	219	2017-03-15		103	4	22.7	22.0333	5.66	4.3	1.28482	0.9761	2.26092	497	238
8	5	23.7	22.9667	4.74	3.81	1.12338	0.90297	2.02635	594	207	2017-02-19		11	6	19.6	20.0333	5.74	4	1.12504	0.784	1.90904	477	231	2017-02-24		27	7	16.1	18.3333	6.49	4.23	1.04489	0.68103	1.72592	509	220	2017-03-16		103	4	21.4	21.7	5.86	4.35	1.25404	0.9309	2.18494	499	239
8	5	21.4	22.4333	4.64	3.86	0.99296	0.82604	1.819	589	208	2017-02-20		11	6	19.5	19.8333	5.55	3.99	1.08225	0.77805	1.8603	467	232	2017-02-25		27	7	19.3	18.7	6.83	4.22	1.31819	0.81446	2.13265	504	221	2017-03-17		103	4	21	21	5.77	4.39	1.2117	0.9219	2.1336	500	240
8	5	22.2	21.6333	4.56	3.81	1.01232	0.84582	1.85814	591	209	2017-02-21		11	6	20.4	20.3333	6.54	4.03	1.33416	0.82212	2.15628	467	233	2017-02-26		27	7	20.7	20.5	7.24	4.18	1.49868	0.86526	2.36394	508	222	2017-03-18		103	4	20.6	20.9333	6.09	4.33	1.25454	0.89198	2.14652	507	241
8	5	21.3	21.7	4.51	3.69	0.96063	0.78597	1.7466	595	210	2017-02-22		11	6	21.1	20.9333	6	4.03	1.266	0.85033	2.11633	467	234	2017-02-27		27	7	21.5	21.2333	6.85	4.2	1.47275	0.903	2.37575	498	223	2017-03-19		103	4	21.2	20.8667	6.15	4.33	1.3038	0.91796	2.22176	510	242
8	5	21.6	21.8667	4.66	3.61	1.00656	0.77976	1.78632	591	211	2017-02-23		11	6	21.3	21.1	5.95	4.36	1.26735	0.92868	2.19603	469	235	2017-02-28		27	7	21.5	21.6333	6.72	4.24	1.4448	0.9116	2.3564	505	224	2017-03-20		103	4	20.8	20.7667	5.89	4.36	1.22512	0.90688	2.132	494	243
8	5	22.7	22.7667	4.72	3.57	1.07144	0.81039	1.88183	600	212	2017-02-24		11	6	20.9	20.8333	5.54	4.41	1.15786	0.92169	2.07955	473	236	2017-03-01		27	7	21.9	21.8	6.46	4.25	1.41474	0.93075	2.34549	507	225	2017-03-21		103	4	20.3	20.2667	5.96	4.4	1.20988	0.8932	2.10308	497	244
8	5	24	23.5333	4.84	3.56	1.1616	0.8544	2.016	593	213	2017-02-25		11	6	20.3	20.5667	5.32	4.45	1.07996	0.90335	1.98331	473	237	2017-03-02		27	7	22	21.1667	6.8	4.23	1.496	0.9306	2.4266	506	226	2017-03-22		103	4	19.7	19.5667	6.07	4.38	1.19579	0.86286	2.05865	500	245
8	5	23.9	24	4.85	3.63	1.15915	0.86757	2.02672	662	214	2017-02-26		11	6	20.5	20.6333	6.01	4.52	1.23205	0.9266	2.15865	469	238	2017-03-03		27	7	19.6	20.1333	6.18	4.28	1.21128	0.83888	2.05016	509	227	2017-03-23		103	4	18.7	18.9667	6.11	4.39	1.14257	0.82093	1.9635	513	246
8	5	24.1	22.3	4.94	3.89	1.19054	0.93749	2.12803	592	215	2017-02-27		11	6	21.1	20.8	6.61	4.43	1.39471	0.93473	2.32944	476	239	2017-03-04		27	7	18.8	19.3	6.23	4.28	1.17124	0.80464	1.97588	538	228	2017-03-24		103	4	18.5	18.0333	5.98	4.39	1.1063	0.81215	1.91845	527	247
8	5	18.9	19.5	5.34	4.24	1.00926	0.80136	1.81062	599	216	2017-02-28		11	6	20.8	21.3	5.95	4.36	1.2376	0.90688	2.14448	471	240	2017-03-05		27	7	19.5	18.8667	5.77	4.27	1.12515	0.83265	1.9578	512	229	2017-03-25		103	4	16.9	18.7	6.54	4.44	1.10526	0.75036	1.85562	516	248
8	5	15.5	17.4667	5.77	4.29	0.89435	0.66495	1.5593	604	217	2017-03-01		11	6	22	21.2333	5.99	4.41	1.3178	0.9702	2.288	468	241	2017-03-06		27	7	18.3	18.9333	5.99	4.28	1.09617	0.78324	1.87941	548	230	2017-03-26		103	4	20.7	18.9667	6.71	4.35	1.38897	0.90045	2.28942	520	249
8	5	18	17.9333	5.86	4.22	1.0548	0.7596	1.8144	580	218	2017-03-02		11	6	20.9	21.0667	5.8	4.42	1.2122	0.92378	2.13598	472	242	2017-03-07		27	7	19	18.65	6.23	4.27	1.1837	0.8113	1.995	513	231	2017-03-27		103	4	19.3	19.4333	6.39	4.34	1.23327	0.83762	2.07089	519	250
8	5	20.3	20	5.44	4.04	1.10432	0.82012	1.92444	592	219	2017-03-03		11	6	20.3	21.0333	5.79	4.42	1.17537	0.89726	2.07263	497	243	2017-03-08		27	7		17.45			0	0	0		232	2017-03-28		103	4	18.3	18.1	6.1	4.35	1.1163	0.79605	1.91235	522	251
8	5	21.7	21.8667	4.9	4	1.0633	0.868	1.9313	578	220	2017-03-04		11	6	21.9	20.8	5.98	4.44	1.30962	0.97236	2.28198	473	244	2017-03-09		27	7	15.9	15.35	6.29	4.3	1.00011	0.6837	1.68381		233	2017-03-29		103	4	16.7	18.1	6.31	4.46	1.05377	0.74482	1.79859	618	252
8	5	23.6	22.9667	4.98	3.94	1.17528	0.92984	2.10512	585	221	2017-03-05		11	6	20.2	20.8333	5.85	4.44	1.1817	0.89688	2.07858	475	245	2017-03-10		27	7	14.8	15.5	6.03	4.26	0.89244	0.63048	1.52292	521	234	2017-03-30		103	4	19.3	18.1667	6.4	4.4	1.2352	0.8492	2.0844	515	253
8	5	23.6	23.5	5.22	3.97	1.23192	0.93692	2.16884	585	222	2017-03-06		11	6	20.4	20.7667	5.93	4.46	1.20972	0.90984	2.11956	475	246	2017-03-11		27	7	15.8	15.7333	6.58	4.26	1.03964	0.67308	1.71272	507	235	2017-03-31		103	4	18.5	18.8	6.77	4.35	1.25245	0.80475	2.0572	508	254
8	5	23.3	23.1333	5.02	4.05	1.16966	0.94365	2.11331	598	223	2017-03-07		11	6	21.7	20.7667	6.16	4.46	1.33672	0.96782	2.30454	477	247	2017-03-12		27	7	16.6	16.7333	6.73	4.21	1.11718	0.69886	1.81604	517	236	2017-04-01		103	4	18.6	18.5	6.62	4.38	1.23132	0.81468	2.046	510	255
8	5	22.5	22.9333	4.94	4.13	1.1115	0.92925	2.04075	594	224	2017-03-08		11	6	20.2	20.6667	5.78	4.46	1.16756	0.90092	2.06848	484	248	2017-03-13		27	7	17.8	17.2667	6.76	4.19	1.20328	0.74582	1.9491	516	237	2017-04-02		103	4	18.4	18.4667	6.37	4.37	1.17208	0.80408	1.97616	513	256
8	5	23	23.1	4.99	4.16	1.1477	0.9568	2.1045	602	225	2017-03-09		11	6	20.1	19.9333	6.12	4.47	1.23012	0.89847	2.12859	477	249	2017-03-14		27	7	17.4	17.6	6.29	4.23	1.09446	0.73602	1.83048	522	238	2017-04-03		103	4	18.4	18.3333	6.32	4.37	1.16288	0.80408	1.96696	516	257
8	5	23.8	22.9	5.11	4.17	1.21618	0.99246	2.20864	609	226	2017-03-10		11	6	19.5	19.5	6.26	4.41	1.2207	0.85995	2.08065	478	250	2017-03-15		27	7		16.05			0	0	0		239	2017-04-04		103	4	18.2	18.4	6.16	4.38	1.12112	0.79716	1.91828	514	258
8	5	21.9	22	5.16	4.26	1.13004	0.93294	2.06298	603	227	2017-03-11		11	6	18.9	19.8667	5.71	4.36	1.07919	0.82404	1.90323	486	251	2017-03-16		27	7	14.7	14.7	6.47	4.35	0.95109	0.63945	1.59054		240	2017-04-05		103	4	18.6	18.4	6.28	4.37	1.16808	0.81282	1.9809	504	259
8	5	20.3	20.7333	5.13	4.29	1.04139	0.87087	1.91226	611	228	2017-03-12		11	6	21.2	19.9	6.74	4.43	1.42888	0.93916	2.36804	485	252	2017-03-17		27	7		15			0	0	0		241	2017-04-06		103	4	18.4	18.6	6.23	4.4	1.14632	0.8096	1.95592	531	260
8	5	20	19.4667	5.08	4.27	1.016	0.854	1.87	596	229	2017-03-13		11	6	19.6	19.5	6.38	4.46	1.25048	0.87416	2.12464	485	253	2017-03-18		27	7	15.3	15.2	6.98	4.37	1.06794	0.66861	1.73655		242	2017-04-07		103	4	18.8	18.7	6.27	4.42	1.17876	0.83096	2.00972	543	261
8	5	18.1	18.3667	4.78	4.22	0.86518	0.76382	1.629	606	230	2017-03-14		11	6	17.7	18.8667	5.63	4.45	0.99651	0.78765	1.78416	484	254	2017-03-19		27	7	15.1	15.6	6.96	4.27	1.05096	0.64477	1.69573	515	243	2017-04-08		103	4	18.9	18.3667	6.42	4.43	1.21338	0.83727	2.05065	520	262
8	5	17	16.5	5.03	4.2	0.8551	0.714	1.5691	597	231	2017-03-15		11	6	19.3	18.4333	6.03	4.49	1.16379	0.86657	2.03036	479	255	2017-03-20		27	7	16.4	15.7	6.84	4.26	1.12176	0.69864	1.8204	518	244	2017-04-09		103	4	17.4	17.9333	6.53	4.43	1.13622	0.77082	1.90704	524	263
8	5	14.4	16.2333	5.15	4.2	0.7416	0.6048	1.3464	612	232	2017-03-16		11	6	18.3	18.4333	6.67	4.49	1.22061	0.82167	2.04228	478	256	2017-03-21		27	7	15.6	15.8667	6.27	4.25	0.97812	0.663	1.64112	535	245	2017-04-10		103	4	17.5	16.8333	6.46	4.44	1.1305	0.777	1.9075	502	264
8	5	17.3	16.2333	5.11	4.16	0.88403	0.71968	1.60371	606	233	2017-03-17		11	6	17.7	18.2333	6.31	4.44	1.11687	0.78588	1.90275	486	257	2017-03-22		27	7	15.6	15.2			0	0	0		246	2017-04-11		103	4	15.6	16.2667	6.45	4.49	1.0062	0.70044	1.70664	523	265
8	5	17	17.2333	4.95	4.07	0.8415	0.6919	1.5334	594	234	2017-03-18		11	6	18.7	18.1333	6.46	4.48	1.20802	0.83776	2.04578	475	258	2017-03-23		27	7	14.4	14.5333	6.2	4.35	0.8928	0.6264	1.5192	519	247	2017-04-12		103	4	15.7	15.4	6.55	4.47	1.02835	0.70179	1.73014	512	266
8	5	17.4	17.8333	5.13	4.06	0.89262	0.70644	1.59906	606	235	2017-03-19		11	6	18	18.0333	6.19	4.46	1.1142	0.8028	1.917	482	259	2017-03-24		27	7	13.6	14.5333	6.99	4.4	0.95064	0.5984	1.54904	538	248	2017-04-13		103	4	14.9	15.8333	6.56	4.53	0.97744	0.67497	1.65241	525	267
8	5	19.1	18.7	5.54	4.02	1.05814	0.76782	1.82596	593	236	2017-03-20		11	6	17.4	17.4667	6.16	4.48	1.07184	0.77952	1.85136	486	260	2017-03-25		27	7	15.6	14.6	7.23	4.32	1.12788	0.67392	1.8018	522	249	2017-04-14		103	4	16.9	16.8	6.5	4.47	1.0985	0.75543	1.85393	589	268
8	5	19.6	18.9333	5.61	4.02	1.09956	0.78792	1.88748	592	237	2017-03-21		11	6	17	17.5	6.23	4.54	1.0591	0.7718	1.8309	486	261	2017-03-26		27	7		14.95			0	0	0		250	2017-04-15		103	4	18.6	17.7	6.66	4.51	1.23876	0.83886	2.07762	551	269
8	5	18.1	19.2667	5.54	4.11	1.00274	0.74391	1.74665	613	238	2017-03-22		11	6	18.1	17.9	5.96	4.46	1.07876	0.80726	1.88602	489	262	2017-03-27		27	7	14.3	14.3	6.69	4.34	0.95667	0.62062	1.57729		251	2017-04-16		103	4	17.6	18.1	6.63	4.49	1.16688	0.79024	1.95712	551	270
8	5	20.1	19.1	5.68	4.18	1.14168	0.84018	1.98186	611	239	2017-03-23		11	6	18.6	18.3	6.31	4.48	1.17366	0.83328	2.00694	478	263	2017-03-28		27	7	14.3	14.4	6.54	4.41	0.93522	0.63063	1.56585	524	252	2017-04-17		103	4	18.1	16.9333	6.47	4.54	1.17107	0.82174	1.99281	524	271
8	5	19.1	19.0333	5.59	4.22	1.06769	0.80602	1.87371	621	240	2017-03-24		11	6	18.2	18.7	6.39	4.54	1.16298	0.82628	1.98926	486	264	2017-03-29		27	7	14.6	14.7	6.99	4.42	1.02054	0.64532	1.66586	502	253	2017-04-18		103	4	15.1	16.0333	6.34	4.54	0.95734	0.68554	1.64288	541	272
8	5	17.9	17.8333	5.44	4.23	0.97376	0.75717	1.73093	620	241	2017-03-25		11	6	19.3	18.9667	6.14	4.48	1.18502	0.86464	2.04966	482	265	2017-03-30		27	7	15.2	15.3	7.25	4.35	1.102	0.6612	1.7632	506	254	2017-04-19		103	4	14.9	14.7667	6.36	4.55	0.94764	0.67795	1.62559	615	273
8	5	16.5	17.3333	5.65	4.25	0.93225	0.70125	1.6335	608	242	2017-03-26		11	6	19.4	19.4667	5.77	4.46	1.11938	0.86524	1.98462	513	266	2017-03-31		27	7	16.1	15.5	6.73	4.32	1.08353	0.69552	1.77905	512	255	2017-04-20		103	4	14.3	14.7667	6.42	4.55	0.91806	0.65065	1.56871	568	274
8	5	17.6	17	5.44	4.21	0.95744	0.74096	1.6984	615	243	2017-03-27		11	6	19.7	19.1	6.34	4.53	1.24898	0.89241	2.14139	471	267	2017-04-01		27	7	15.2	15.8	6.62	4.33	1.00624	0.65816	1.6644	529	256	2017-04-21		103	4	15.1	14.4333	7.04	4.5	1.06304	0.6795	1.74254	589	275
8	5	16.9	16.6333	5.49	4.19	0.92781	0.70811	1.63592	626	244	2017-03-28		11	6	18.2	18.8333	5.68	4.5	1.03376	0.819	1.85276	472	268	2017-04-02		27	7	16.1	15.4333	6.44	4.33	1.03684	0.69713	1.73397	529	257	2017-04-22		103	4	13.9	14.3667	6.95	4.47	0.96605	0.62133	1.58738	594	276
8	5	15.4	16.2	5.5	4.2	0.847	0.6468	1.4938	613	245	2017-03-29		11	6	18.6	18.4333	6.41	4.54	1.19226	0.84444	2.0367	481	269	2017-04-03		27	7	15	15.4	6.3	4.36	0.945	0.654	1.599	518	258	2017-04-23		103	4	14.1	15	7.11	4.54	1.00251	0.64014	1.64265	559	277
8	5	16.3	15.3667	5.53	4.21	0.90139	0.68623	1.58762	622	246	2017-03-30		11	6	18.5	18.5333	5.98	4.42	1.1063	0.8177	1.924	535	270	2017-04-04		27	7	15.1	14.7667	6.8	4.4	1.0268	0.6644	1.6912	513	259	2017-04-24		103	4	17	15.9333	6.88	4.5	1.1696	0.765	1.9346	585	278
8	5	14.4	14.8333	5.77	4.24	0.83088	0.61056	1.44144	631	247	2017-03-31		11	6	18.5	19.5	6.19	4.43	1.14515	0.81955	1.9647	471	271	2017-04-05		27	7	14.2	14.1667	6.74	4.38	0.95708	0.62196	1.57904	521	260	2017-04-25		103	4	16.7	16.8	6.78	4.47	1.13226	0.74649	1.87875	562	279
8	5	13.8	14.5	5.73	4.23	0.79074	0.58374	1.37448	622	248	2017-04-01		11	6	21.5	20.3	5.82	4.39	1.2513	0.94385	2.19515	494	272	2017-04-06		27	7	13.2	13.3	7.39	4.43	0.97548	0.58476	1.56024	533	261	2017-04-26		103	4	16.7	16.7667	6.55	4.5	1.09385	0.7515	1.84535	526	280
8	5	15.3	14.8	5.8	4.16	0.8874	0.63648	1.52388	626	249	2017-04-02		11	6	20.9	21.6333	5.71	4.44	1.19339	0.92796	2.12135	485	273	2017-04-07		27	7	12.5	13.1333	7.16	4.42	0.895	0.5525	1.4475	536	262	2017-04-27		103	4	16.9	16.8333	6.41	4.49	1.08329	0.75881	1.8421	527	281
8	5	15.3	15.5333	5.97	4.19	0.91341	0.64107	1.55448	617	250	2017-04-03		11	6	22.5	21.7	5.66	4.54	1.2735	1.0215	2.295	491	274	2017-04-08		27	7	13.7	13.4	7.35	4.42	1.00695	0.60554	1.61249	502	263	2017-04-28		103	4	16.9	16.6667	6.38	4.5	1.07822	0.7605	1.83872	557	282
8	5	16	15	5.97	4.22	0.9552	0.6752	1.6304	604	251	2017-04-04		11	6	21.7	21.6	5.75	4.6	1.24775	0.9982	2.24595	474	275	2017-04-09		27	7	14	13.85	7.31	4.39	1.0234	0.6146	1.638	528	264	2017-04-29		103	4	16.2	15.7667	6.54	4.53	1.05948	0.73386	1.79334	555	283
8	5	13.7		5.95	4.24				601		2017-04-05		11	6	20.6	20.3667	5.74	4.58	1.18244	0.94348	2.12592	480	276	2017-04-10		27	7		11.7			0	0	0		265	2017-04-30		103	4	14.2	14.7	6.4	4.51	0.9088	0.64042	1.54922	583	284
													11	6	18.8	19.0333	5.51	4.54	1.03588	0.85352	1.8894	475	277	2017-04-11		27	7	9.4	9.45	7.2	4.43	0.6768	0.41642	1.09322		266	2017-05-01		103	4	13.7	15.0333	6.86	4.54	0.93982	0.62198	1.5618	576	285
													11	6	17.7	18.9	5.77	4.51	1.02129	0.79827	1.81956	478	278	2017-04-12		27	7	9.5	9.93333	7.81	4.48	0.74195	0.4256	1.16755	526	267	2017-05-02		103	4	17.2	15.9333	6.84	4.45	1.17648	0.7654	1.94188	586	286
													11	6	20.2	18.9	5.94	4.45	1.19988	0.8989	2.09878	479	279	2017-04-13		27	7	10.9	10.7667	8.04	4.43	0.87636	0.48287	1.35923	489	268	2017-05-03		103	4	16.9	16.7333	6.94	4.4	1.17286	0.7436	1.91646	558	287
													11	6	18.8	19.5667	6.14	4.5	1.15432	0.846	2.00032	468	280	2017-04-14		27	7	11.9	11.3	7.87	4.38	0.93653	0.52122	1.45775	538	269	2017-05-04		103	4	16.1	15.9	6.66	4.4	1.07226	0.7084	1.78066	577	288
													11	6	19.7	19.1333	6.48	4.55	1.27656	0.89635	2.17291	474	281	2017-04-15		27	7	11.1	11.2667	7.73	4.3	0.85803	0.4773	1.33533	525	270	2017-05-05		103	4	14.7	15.0333	6.46	4.42	0.94962	0.64974	1.59936	538	289
													11	6	18.9	19.2667	5.97	4.52	1.12833	0.85428	1.98261	480	282	2017-04-16		27	7	10.8	11.1333	7.33	4.33	0.79164	0.46764	1.25928	544	271	2017-05-06		103	4	14.3	15.1667	6.58	4.4	0.94094	0.6292	1.57014	549	290
													11	6	19.2	18.6667	5.61	4.42	1.07712	0.84864	1.92576	479	283	2017-04-17		27	7	11.5	11.4667	7.48	4.38	0.8602	0.5037	1.3639	511	272	2017-05-07		103	4	16.5	16.3	6.55	4.37	1.08075	0.72105	1.8018	533	291
													11	6	17.9	18.7333	6.22	4.5	1.11338	0.8055	1.91888	480	284	2017-04-18		27	7	12.1	11.6667	7.14	4.38	0.86394	0.52998	1.39392	542	273	2017-05-08		103	4	18.1	17.0667	6.56	4.36	1.18736	0.78916	1.97652	592	292
													11	6	19.1	18.7	6.42	4.55	1.22622	0.86905	2.09527	476	285	2017-04-19		27	7	11.4	11.8	7.23	4.37	0.82422	0.49818	1.3224	537	274	2017-05-09		103	4	16.6	17	6.23	4.37	1.03418	0.72542	1.7596	553	293
													11	6	19.1	18.9667	6.31	4.51	1.20521	0.86141	2.06662	474	286	2017-04-20		27	7	11.9	12.1	7.29	4.36	0.86751	0.51884	1.38635	526	275	2017-05-10		103	4	16.3	15.5333	6.04	4.38	0.98452	0.71394	1.69846	512	294
													11	6	18.7	18.7667	6.38	4.57	1.19306	0.85459	2.04765	484	287	2017-04-21		27	7	13	12.5333	7.35	4.39	0.9555	0.5707	1.5262	527	276	2017-05-11		103	4	13.7	15.1667	6.4	4.49	0.8768	0.61513	1.49193	525	295
													11	6	18.5	19.1333	6.19	4.56	1.14515	0.8436	1.98875	476	288	2017-04-22		27	7	12.7	12.9333	6.91	4.44	0.87757	0.56388	1.44145	527	277	2017-05-12		103	4	15.5	14.1	6.46	4.47	1.0013	0.69285	1.69415	516	296
													11	6	20.2	18.9667	6.53	4.6	1.31906	0.9292	2.24826	486	289	2017-04-23		27	7	13.1	13.0333	6.81	4.47	0.89211	0.58557	1.47768	523	278	2017-05-13		103	4	13.1	14.1333	7.01	4.57	0.91831	0.59867	1.51698	519	297
													11	6	18.2	19.0667	6.54	4.61	1.19028	0.83902	2.0293	481	290	2017-04-24		27	7	13.3	13.3667	6.59	4.41	0.87647	0.58653	1.463	519	279	2017-05-14		103	4	13.8	13.6333	7.04	4.54	0.97152	0.62652	1.59804	523	298
													11	6	18.8	18.5	6.51	4.61	1.22388	0.86668	2.09056	479	291	2017-04-25		27	7	13.7	12.9	6.5	4.4	0.8905	0.6028	1.4933	523	280	2017-05-15		103	4	14	14.2333	7.01	4.55	0.9814	0.637	1.6184	526	299
													11	6	18.5	18.4	6.36	4.58	1.1766	0.8473	2.0239	478	292	2017-04-26		27	7	11.7	12.2667	6.73	4.45	0.78741	0.52065	1.30806	521	281	2017-05-16		103	4	14.9	15	6.97	4.48	1.03853	0.66752	1.70605	527	300
													11	6	17.9	18.1333	6.24	4.55	1.11696	0.81445	1.93141	474	293	2017-04-27		27	7	11.4	11.4667	6.86	4.45	0.78204	0.5073	1.28934	531	282	2017-05-17		103	4	16.1	15.7333	7.15	4.47	1.15115	0.71967	1.87082	531	301
													11	6	18	18.4667	6.3	4.55	1.134	0.819	1.953	478	294	2017-04-28		27	7	11.3	11.4667	7.14	4.46	0.80682	0.50398	1.3108	526	283	2017-05-18		103	4	16.2	16	6.5	4.46	1.053	0.72252	1.77552	535	302
													11	6	19.5	18.8	6.38	4.54	1.2441	0.8853	2.1294	479	295	2017-04-29		27	7	11.7	11.5333	7.04	4.41	0.82368	0.51597	1.33965	526	284	2017-05-19		103	4	15.7	16.3667	6.46	4.55	1.01422	0.71435	1.72857	537	303
													11	6	18.9	19.0333	6.4	4.55	1.2096	0.85995	2.06955	480	296	2017-04-30		27	7	11.6	11.6667	6.95	4.43	0.8062	0.51388	1.32008	526	285	2017-05-20		103	4	17.2	16.5	6.48	4.57	1.11456	0.78604	1.9006	534	304
													11	6	18.7	18.7333	6.42	4.57	1.20054	0.85459	2.05513	474	297	2017-05-01		27	7	11.7	11.7333	7.29	4.48	0.85293	0.52416	1.37709	531	286	2017-05-21		103	4	16.6	16.8333	6.46	4.53	1.07236	0.75198	1.82434	538	305
													11	6	18.6	18.7667	6.48	4.58	1.20528	0.85188	2.05716	479	298	2017-05-02		27	7	11.9	11.8667	7.07	4.48	0.84133	0.53312	1.37445	529	287	2017-05-22		103	4	16.7	16.0667	6.33	4.51	1.05711	0.75317	1.81028	540	306
													11	6	19	18.6667	6.28	4.58	1.1932	0.8702	2.0634	479	299	2017-05-03		27	7	12	11.6	7.2	4.46	0.864	0.5352	1.3992	527	288	2017-05-23		103	4	14.9	15.5333	6.47	4.53	0.96403	0.67497	1.639	539	307
													11	6	18.4	18.4333	6.4	4.57	1.1776	0.84088	2.01848	474	300	2017-05-04		27	7	10.9	11.4333	7.01	4.45	0.76409	0.48505	1.24914	546	289	2017-05-24		103	4	15	14.95	6.6	4.51	0.99	0.6765	1.6665	518	308
													11	6	17.9	18.1667	6.51	4.55	1.16529	0.81445	1.97974	470	301	2017-05-05		27	7	11.4	10.9667	7.22	4.46	0.82308	0.50844	1.33152	544	290	2017-05-25		103	4		11.65			0	0	0		309
													11	6	18.2	17.8	6.46	4.57	1.17572	0.83174	2.00746	479	302	2017-05-06		27	7	10.6	11.0333	7.09	4.47	0.75154	0.47382	1.22536	522	291	2017-05-26		103	4	8.3	9	7.03	4.52	0.58349	0.37516	0.95865		310
													11	6	17.3	17.7	6.5	4.59	1.1245	0.79407	1.91857	483	303	2017-05-07		27	7	11.1	11.1333	7.05	4.45	0.78255	0.49395	1.2765	549	292	2017-05-27		103	4	9.7	11.3	7.27	4.49	0.70519	0.43553	1.14072	512	311
													11	6	17.6	17.4667	6.12	4.63	1.07712	0.81488	1.892	483	304	2017-05-08		27	7	11.7	11.6333	6.64	4.44	0.77688	0.51948	1.29636	531	293	2017-05-28		103	4	15.9	14.2	7.81	4.55	1.24179	0.72345	1.96524	530	312
													11	6	17.5	17.7333	5.83	4.6	1.02025	0.805	1.82525	483	305	2017-05-09		27	7	12.1	11.8			0	0	0	541	294	2017-05-29		103	4	17	16.3			0	0	0	525	313
													11	6	18.1	19.3	5.71	4.58	1.03351	0.82898	1.86249	478	306	2017-05-10		27	7	11.6	11.5667	7.11	4.55	0.82476	0.5278	1.35256	550	295	2017-05-30		103	4	16	15.8667	6.75	4.59	1.08	0.7344	1.8144	531	314
													11	6	22.3	19.6	6.22	4.62	1.38706	1.03026	2.41732	518	307	2017-05-11		27	7	11	11.2	6.86	4.5	0.7546	0.495	1.2496	544	296	2017-05-31		103	4	14.6	15.1667	6.89	4.62	1.00594	0.67452	1.68046	537	315
													11	6	18.4	19.9333	6.56	4.62	1.20704	0.85008	2.05712	475	308	2017-05-12		27	7	11	10.4667			0	0	0		297	2017-06-01		103	4	14.9	14.7	7	4.61	1.043	0.68689	1.72989	535	316
													11	6	19.1	18.3333	6.33	4.65	1.20903	0.88815	2.09718	482	309	2017-05-13		27	7	9.4	9.6	6.68	4.49	0.62792	0.42206	1.04998	533	298	2017-06-02		103	4	14.6	14.6333	7.11	4.62	1.03806	0.67452	1.71258	531	317
													11	6	17.5	16.8333	6.14	4.67	1.0745	0.81725	1.89175	482	310	2017-05-14		27	7	8.4	9	6.8	4.5	0.5712	0.378	0.9492	534	299	2017-06-03		103	4	14.4	14.3333	6.97	4.58	1.00368	0.65952	1.6632	535	318
													11	6	13.9	15.7333	5.75	4.64	0.79925	0.64496	1.44421	479	311	2017-05-15		27	7	9.2	8.63333	6.97	4.5	0.64124	0.414	1.05524	548	300	2017-06-04		103	4	14	13.8	6.87	4.54	0.9618	0.6356	1.5974	519	319
													11	6	15.8	15.6333	6.37	4.61	1.00646	0.72838	1.73484	472	312	2017-05-16		27	7	8.3	8.7	7.32	4.49	0.60756	0.37267	0.98023	539	301	2017-06-05		103	4	13	13.2667	6.97	4.57	0.9061	0.5941	1.5002	536	320
													11	6	17.2	17.2333	6.64	4.51	1.14208	0.77572	1.9178	485	313	2017-05-17		27	7	8.6	8.45	7.23	4.49	0.62178	0.38614	1.00792	518	302	2017-06-06		103	4	12.8	12.7667	7.02	4.58	0.89856	0.58624	1.4848	544	321
													11	6	18.7	17.6667	6.32	4.48	1.18184	0.83776	2.0196	487	314	2017-05-18			7												103	4	12.5	12.6667	7.41	4.66	0.92625	0.5825	1.50875	519	322
													11	6	17.1	17.7	6.45	4.63	1.10295	0.79173	1.89468	484	315	2017-05-19															103	4	12.7	12.4	7.36	4.63	0.93472	0.58801	1.52273	537	323
													11	6	17.3	17.3	6.54	4.62	1.13142	0.79926	1.93068	483	316	2017-05-20															103	4	12	11.8333	7.42	4.58	0.8904	0.5496	1.44	539	324
													11	6	17.5	17.2667	6.51	4.64	1.13925	0.812	1.95125	490	317	2017-05-21															103	4	10.8	11.4667	7.55	4.62	0.8154	0.49896	1.31436	547	325
													11	6	17	17.2667	6.14	4.63	1.0438	0.7871	1.8309	495	318	2017-05-22															103	4	11.6	11.6667	7.45	4.61	0.8642	0.53476	1.39896	555	326
													11	6	17.3	16.8	6.12	4.64	1.05876	0.80272	1.86148	484	319	2017-05-23															103	4	12.6	12.6	7.6	4.61	0.9576	0.58086	1.53846	550	327
													11	6	16.1	17.0333	6.59	4.65	1.06099	0.74865	1.80964	486	320	2017-05-24															103	4	13.6	13.4	7.43	4.53	1.01048	0.61608	1.62656	541	328
													11	6	17.7	17.7	6.35	4.6	1.12395	0.8142	1.93815	486	321	2017-05-25															103	4	14	13.7	7.27	4.51	1.0178	0.6314	1.6492	521	329
													11	6	19.3	18.5333	6.16	4.54	1.18888	0.87622	2.0651	488	322	2017-05-26															103	4	13.5	13.8333	6.94	4.53	0.9369	0.61155	1.54845	553	330
													11	6	18.6	18.7	6.12	4.54	1.13832	0.84444	1.98276	493	323	2017-05-27															103	4	14	13.5667	6.89	4.57	0.9646	0.6398	1.6044	542	331
													11	6	18.2	18.4667			0	0	0	492	324	2017-05-28															103	4	13.2	13.2	6.72	4.59	0.88704	0.60588	1.49292	560	332
													11	6	18.6	18.2667	6.06	4.81	1.12716	0.89466	2.02182	497	325	2017-05-29															103	4	12.4	12.6667	6.86	4.61	0.85064	0.57164	1.42228	535	333
													11	6	18	17.8667	6.09	4.77	1.0962	0.8586	1.9548	498	326	2017-05-30															103	4	12.4	12.1667	7.07	4.61	0.87668	0.57164	1.44832	549	334
													11	6	17	16.9333	6.36	4.78	1.0812	0.8126	1.8938	489	327	2017-05-31															103	4	11.7	11.7333	7.23	4.58	0.84591	0.53586	1.38177	530	335
													11	6	15.8	16.7667	6.53	4.75	1.03174	0.7505	1.78224	484	328	2017-06-01															103	4	11.1	11.3	7.26	4.56	0.80586	0.50616	1.31202	533	336
													11	6	17.5	16.9333	6.11	4.6	1.06925	0.805	1.87425	489	329	2017-06-02															103	4	11.1	11.3	7.37	4.55	0.81807	0.50505	1.32312	540	337
													11	6	17.5	17.4667	6.12	4.64	1.071	0.812	1.883	492	330	2017-06-03															103	4	11.7	11.5333	7.41	4.5	0.86697	0.5265	1.39347	543	338
													11	6	17.4	17.2	6.29	4.76	1.09446	0.82824	1.9227	489	331	2017-06-04															103	4	11.8	11.5333	7.34	4.47	0.86612	0.52746	1.39358	521	339
													11	6	16.7	17.3333	6.26	4.74	1.04542	0.79158	1.837	486	332	2017-06-05															103	4	11.1	11.2667	7.14	4.46	0.79254	0.49506	1.2876	550	340
													11	6	17.9	17.4333	6.35	4.72	1.13665	0.84488	1.98153	489	333	2017-06-06															103	4	10.9	10.8667	7.03	4.48	0.76627	0.48832	1.25459	549	341
													11	6	17.7	17.5333	6.42	4.75	1.13634	0.84075	1.97709	491	334	2017-06-07															103	4	10.6	10.7	7.08	4.49	0.75048	0.47594	1.22642	543	342
													11	6	17	16.9333	6.17	4.75	1.0489	0.8075	1.8564	548	335	2017-06-08															103	4	10.6		7.2	4.5				552
													11	6	16.1	16.4667	6.22	4.76	1.00142	0.76636	1.76778	500	336	2017-06-09
													11	6	16.3	15.9333	6.25	4.73	1.01875	0.77099	1.78974	499	337	2017-06-10
													11	6	15.4	16.2333	6.36	4.7	0.97944	0.7238	1.70324	496	338	2017-06-11
													11	6	17	16.0333	6.58	4.68	1.1186	0.7956	1.9142	499	339	2017-06-12
													11	6	15.7	16.0333	6.25	4.71	0.98125	0.73947	1.72072	496	340	2017-06-13
													11	6	15.4	15.3333	6.34	4.72	0.97636	0.72688	1.70324	485	341	2017-06-14
													11	6	14.9	15.2333	6.63	4.71	0.98787	0.70179	1.68966	494	342	2017-06-15
													11	6	15.4	15.1	6.56	4.68	1.01024	0.72072	1.73096	498	343	2017-06-16
													11	6	15	14.8667	6.42	4.68	0.963	0.702	1.665	502	344	2017-06-17
													11	6	14.2	14.7	6.49	4.74	0.92158	0.67308	1.59466	497	345	2017-06-18
													11	6	14.9	14.6333	6.64	4.77	0.98936	0.71073	1.70009	502	346	2017-06-19
													11	6	14.8	14.8	6.57	4.73	0.97236	0.70004	1.6724	492	347	2017-06-20
													11	6	14.7	14.8	6.42	4.77	0.94374	0.70119	1.64493	501	348	2017-06-21
													11	6	14.9	14.5333	6.51	4.77	0.96999	0.71073	1.68072	498	349	2017-06-22
													11	6	14	14.5333	6.72	4.75	0.9408	0.665	1.6058	506	350	2017-06-23
													11	6	14.7	14.7667	6.7	4.73	0.9849	0.69531	1.68021	508	351	2017-06-24
													11	6	15.6	14.9	6.38	4.73	0.99528	0.73788	1.73316	496	352	2017-06-25
													11	6	14.4	14.8667	6.2	4.76	0.8928	0.68544	1.57824	513	353	2017-06-26
													11	6	14.6	14.6333	6.28	4.78	0.91688	0.69788	1.61476	506	354	2017-06-27
													11	6	14.9	14.5667	6.36	4.76	0.94764	0.70924	1.65688	507	355	2017-06-28
													11	6	14.2	14.2	6.5	4.79	0.923	0.68018	1.60318	508	356	2017-06-29
													11	6	13.5	14.2333	6.52	4.78	0.8802	0.6453	1.5255	513	357	2017-06-30
													11	6	15	14.3333	6.45	4.68	0.9675	0.702	1.6695	507	358	2017-07-01
													11	6	14.5	14.7333	6.62	4.69	0.9599	0.68005	1.63995	512	359	2017-07-02
													11	6	14.7	14.5	6.27	4.68	0.92169	0.68796	1.60965	495	360	2017-07-03
													11	6	14.3	14.2667	6.14	4.69	0.87802	0.67067	1.54869	508	361	2017-07-04
													11	6	13.8	13.8667	6.18	4.71	0.85284	0.64998	1.50282	498	362	2017-07-05
													11	6	13.5	13.9	6.11	4.71	0.82485	0.63585	1.4607	517	363	2017-07-06
													11	6	14.4	13.8667	6.2	4.64	0.8928	0.66816	1.56096	504	364	2017-07-07
													11	6	13.7	13.8	6.32	4.68	0.86584	0.64116	1.507	508	365	2017-07-08
													11	6	13.3	13.3333	6.63	4.75	0.88179	0.63175	1.51354	505	366	2017-07-09
													11	6	13	13.2333	6.56	4.74	0.8528	0.6162	1.469	502	367	2017-07-10
													11	6	13.4	12.9333	6.28	4.71	0.84152	0.63114	1.47266	499	368	2017-07-11
													11	6	12.4	12.8667	6.02	4.72	0.74648	0.58528	1.33176	508	369	2017-07-12
													11	6	12.8	12.6	6.49	4.78	0.83072	0.61184	1.44256	506	370	2017-07-13
													11	6	12.6	12.4667	6.7	4.77	0.8442	0.60102	1.44522	504	371	2017-07-14
													11	6	12	12.1667	6.77	4.79	0.8124	0.5748	1.3872	506	372	2017-07-15
													11	6	11.9	11.9333	6.66	4.79	0.79254	0.57001	1.36255	508	373	2017-07-16
													11	6	11.9	12	6.89	4.79	0.81991	0.57001	1.38992	498	374	2017-07-17
													11	6	12.2	12.1333	7.01	4.78	0.85522	0.58316	1.43838	503	375	2017-07-18
													11	6	12.3	11.9667	6.47	4.69	0.79581	0.57687	1.37268	507	376	2017-07-19
													11	6	11.4	11.9333	6.32	4.69	0.72048	0.53466	1.25514	510	377	2017-07-20
													11	6	12.1	11.6333	6.54	4.71	0.79134	0.56991	1.36125	499	378	2017-07-21
													11	6	11.4	11.5333	6.7	4.72	0.7638	0.53808	1.30188	500	379	2017-07-22
													11	6	11.1	11.3667	6.96	4.73	0.77256	0.52503	1.29759	504	380	2017-07-23
													11	6	11.6	11.4667	6.91	4.71	0.80156	0.54636	1.34792	510	381	2017-07-24
													11	6	11.7	11.2667	6.81	4.72	0.79677	0.55224	1.34901	497	382	2017-07-25
													11	6	10.5	10.8667	6.77	4.76	0.71085	0.4998	1.21065	506	383	2017-07-26
													11	6	10.4	10.4333	6.66	4.75	0.69264	0.494	1.18664	502	384	2017-07-27
													11	6	10.4	10.3667	6.65	4.74	0.6916	0.49296	1.18456	507	385	2017-07-28
													11	6	10.3	10.3	6.46	4.74	0.66538	0.48822	1.1536	507	386	2017-07-29
													11	6	10.2	10.4333	6.69	4.73	0.68238	0.48246	1.16484	511	387	2017-07-30
													11	6	10.8	10.4667	6.74	4.72	0.72792	0.50976	1.23768	510	388	2017-07-31
													11	6	10.4	10.4333	6.64	4.74	0.69056	0.49296	1.18352	510	389	2017-08-01
													11	6	10.1	10.3667	6.71	4.78	0.67771	0.48278	1.16049	508	390	2017-08-02
													11	6	10.6	10.3667	6.63	4.78	0.70278	0.50668	1.20946	509	391	2017-08-03
													11	6	10.4	10.3333	6.68	4.78	0.69472	0.49712	1.19184	563	392	2017-08-04
													11	6	10	10.1667	6.46	4.72	0.646	0.472	1.118	515	393	2017-08-05
													11	6	10.1		6.51	4.72				496		2017-08-06
[truncated: 237 more columns]

## Sheet: July-Aug 2016
Animal Number	Parity	Day Production	Fat indication	Protein indication	Weight	Date		Animal Number	Parity	Day Production	Milk Yield	Fat indication	Protein indication	Fat yield	Protein Yield	MS total	Weight	Ratio	Days from Peak	Date		Animal Number	Day Production	Fat indication	Protein indication	Weight	Date		Animal Number	Day Production	Fat indication	Protein indication	Weight	Date		Animal Number	Day Production	Fat indication	Protein indication	Weight	Date		Animal Number	Day Production	Fat indication	Protein indication	Weight	Date
36						2016-08-23		42	3	12.2	8.75	2.09	3.94	0.25498	0.48068	0.73566		0	-78	2016-08-18		66	4.4	4.3	5.86		2016-07-29		117	0.8	2.71	5.53		2016-08-05		119	1.2	3.7	5.59		2016-07-20		125	4.3	6.02	5.92		2016-08-09
36		7.1	3.08	5.94		2016-08-24		42	3	5.3	9.03333	5.75	5.19	0.30475	0.27507	0.57982	424	0.883333	-77	2016-08-19		66	11	3.88	5.74	494	2016-07-30		117	2.3	3.25	5.54	457	2016-08-06		119	12.5	4.09	5.57	413	2016-07-21		125	15.3	6.61	5.99	545	2016-08-10
36		14.1	4.14	5.68	525	2016-08-25		42	3	9.6	8.7	6.26	5.34	0.60096	0.51264	1.1136	433	0.902083	-76	2016-08-20		66	16.3	4.56	5.62	504	2016-07-31		117	3	3.12	5.46	461	2016-08-07		119	15.4	5	5.55	409	2016-07-22		125	20.9	8.3	5.85	554	2016-08-11
36		17.6	6.06	5.56	528	2016-08-26		42	3	11.2	11.2	7.03	5.5	0.78736	0.616	1.40336	443	0.922917	-75	2016-08-21		66	20.6	5.87	5.34	505	2016-08-01		117	3.5	4.94	5.31	490	2016-08-08		119	17.2	6.25	5.45	412	2016-07-23		125	24.2	7.07	5.49	548	2016-08-12
36		20.4	6.47	5.43	523	2016-08-27		42	3	12.8	12.5333	6.41	5.38	0.82048	0.68864	1.50912	442	0.920833	-74	2016-08-22		66	22.9	5.64	5.11	504	2016-08-02		117	5	4.95	5.21	479	2016-08-09		119	19.4	7.5	5.21	406	2016-07-24		125	26.4	6.04	5.07	550	2016-08-13
36		20.9	6.08	5.05	532	2016-08-28		42	3	13.6	13.6	6.24	5.34	0.84864	0.72624	1.57488	439	0.914583	-73	2016-08-23		66	25	4.94	4.96	501	2016-08-03		117	6.1	5.7	5.08	503	2016-08-10		119	21.8	6.88	4.98	419	2016-07-25		125	26.2	5.44	4.79	552	2016-08-14
36		24	5.88	4.81	541	2016-08-29		42	3	14.4	14.0333	5.35	5.2	0.7704	0.7488	1.5192	421	0.877083	-72	2016-08-24		66	26.2	5.28	4.83	497	2016-08-04		117	5.8	5.72	4.98	508	2016-08-11		119	22.4	6.41	4.82	425	2016-07-26		125	27.1	5.1	4.5	588	2016-08-15
36		26.1	5.34	4.7	549	2016-08-30		42	3	14.1	13.8667	5.21	5.11	0.73461	0.72051	1.45512	403	0.839583	-71	2016-08-25		66	27.6	5.12	4.66	502	2016-08-05		117	6.6	6.11	4.97	513	2016-08-12		119	24	5.91	4.63	428	2016-07-27		125	29.8	5.23	4.38	556	2016-08-16
36		24.1	5.38	4.54	546	2016-08-31		42	3	13.1	13.6333	4.98	4.82	0.65238	0.63142	1.2838	405	0.84375	-70	2016-08-26		66	28.1	4.99	4.5	506	2016-08-06		117	9	6.73	4.94	505	2016-08-13		119	24.6	5.61	4.56	423	2016-07-28		125	29.1	4.8	4.27	552	2016-08-17
36		25.9	5.41	4.39	544	2016-09-01		42	3	13.7	14	5.52	4.7	0.75624	0.6439	1.40014	413	0.860417	-69	2016-08-27		66	28.8	4.94	4.4	507	2016-08-07		117	10.3	6.96	4.85	493	2016-08-14		119	25.8	5.33	4.51	437	2016-07-29		125	31.6	4.98	4.2	558	2016-08-18
36		27.2	5	4.27	547	2016-09-02		42	3	15.2	15.1	5.61	4.5	0.85272	0.684	1.53672	425	0.885417	-68	2016-08-28		66	29	4.86	4.29	508	2016-08-08		117	11.4	6.39	4.69	490	2016-08-15		119	27.6	5.19	4.46	432	2016-07-30		125	32.4	4.71	4.1	586	2016-08-19
36		27.2	4.85	4.19	539	2016-09-03		42	3	16.4	16.3	5.44	4.41	0.89216	0.72324	1.6154	425	0.885417	-67	2016-08-29		66	31	4.88	4.2	501	2016-08-09		117	12.3	6.12	4.65	481	2016-08-16		119	27.1	5.13	4.4	425	2016-07-31		125	34.8	4.7	4.05	549	2016-08-20
36		26.3	4.78	4.12	546	2016-09-04		42	3	17.3	17.1333	4.89	4.4	0.84597	0.7612	1.60717	432	0.9	-66	2016-08-30		66	30.8	4.73	4.13	511	2016-08-10		117	12.8	6.25	4.59	483	2016-08-17		119	27.6	5.25	4.32	422	2016-08-01		125	34.1	4.59	4.07	544	2016-08-21
36		27.6	4.79	4.01	541	2016-09-05		42	3	17.7	17.9333	4.6	4.39	0.8142	0.77703	1.59123	430	0.895833	-65	2016-08-31		66	30.8	4.76	4.1	499	2016-08-11		117	13.4	5.82	4.33	501	2016-08-18		119	28.8	5.13	4.22	433	2016-08-02		125	34.3	4.74	3.98	541	2016-08-22
36		28.1	4.71	3.93	533	2016-09-06		42	3	18.8	18.5667	4.5	4.42	0.846	0.83096	1.67696	433	0.902083	-64	2016-09-01		66	30.5	4.72	4.07	503	2016-08-12		117	14.1	5.77	4.33	492	2016-08-19		119	28.3	5.12	4.2	433	2016-08-03		125	34.1	4.65	3.95	545	2016-08-23
36		28.1	4.73	3.9	530	2016-09-07		42	3	19.2	19.1	4.61	4.39	0.88512	0.84288	1.728	436	0.908333	-63	2016-09-02		66	30.5	4.62	4.02	504	2016-08-13		117	14.1	5.67	4.37	496	2016-08-20		119	29	5.03	4.14	479	2016-08-04		125	35.6	4.68	3.91	544	2016-08-24
36		28.5	4.53	3.85	541	2016-09-08		42	3	19.3	19.1333	4.62	4.32	0.89166	0.83376	1.72542	435	0.90625	-62	2016-09-03		66	31.3	4.56	3.93	506	2016-08-14		117	14.3	5.45	4.29	502	2016-08-21		119	29	4.97	4.1	434	2016-08-05		125	36.6	4.82	3.87	552	2016-08-25
36		28.5	4.65	3.82	539	2016-09-09		42	3	18.9	19.2667	4.59	4.24	0.86751	0.80136	1.66887	431	0.897917	-61	2016-09-04		66	31.3	4.4	3.88	503	2016-08-15		117	14.9	5.16	4.18	498	2016-08-22		119	28.3	4.9	4.09	513	2016-08-06		125	35.9	4.75	3.79	545	2016-08-26
36		28.7	4.61	3.82	546	2016-09-10		42	3	19.6	19.4	4.93	4.17	0.96628	0.81732	1.7836	436	0.908333	-60	2016-09-05		66	31.7	4.31	3.81	507	2016-08-16		117	15.1	4.8	4.09	502	2016-08-23		119	26.6	4.51	4.11	430	2016-08-07		125	37	4.7	3.75	543	2016-08-27
36		29.3	4.49	3.78	543	2016-09-11		42	3	19.7	19.5667	4.76	4.07	0.93772	0.80179	1.73951	435	0.90625	-59	2016-09-06		66	31.2	4.05	3.78	509	2016-08-17		117	15.8	4.78	4.09	509	2016-08-24		119	26.3	4.38	4.06	433	2016-08-08		125	36.4	4.6	3.66	538	2016-08-28
36		28.7	4.53	3.7	539	2016-09-12		42	3	19.4	19.2	5.21	4.1	1.01074	0.7954	1.80614	443	0.922917	-58	2016-09-07		66	31.8	4.14	3.74	499	2016-08-18		117	14	4.82	4.06	511	2016-08-25		119	28	4.74	4.02	432	2016-08-09		125	37.9	4.45	3.63	535	2016-08-29
36		28.6	4.8	3.75	527	2016-09-13		42	3	18.5	19.1333	4.91	4.03	0.90835	0.74555	1.6539	431	0.897917	-57	2016-09-08		66	29.1	4.5	3.68	515	2016-08-19		117	16.7	5.23	4.02	507	2016-08-26		119	26.5	4.66	4.04	443	2016-08-10		125	37.3	4.41	3.6	550	2016-08-30
36		29.4	4.64	3.75	535	2016-09-14		42	3	19.5	19.5333	4.82	3.9	0.9399	0.7605	1.7004	441	0.91875	-56	2016-09-09		66	30.9	4.1	3.59	503	2016-08-20		117	15.7	5.32	3.98	515	2016-08-27		119	25.9	4.67	4.04	436	2016-08-11		125	37	4.53	3.52	544	2016-08-31
36		28.7	4.45	3.69	525	2016-09-15		42	3	20.6	20.1333	4.98	3.9	1.02588	0.8034	1.82928	437	0.910417	-55	2016-09-10		66	31.5	4.27	3.54	542	2016-08-21		117	15.9	5.47	3.9	506	2016-08-28		119	26.6	4.39	4.05	412	2016-08-12		125	35.5	4.33	3.45	542	2016-09-01
36		30.8	4.86	3.6	538	2016-09-16		42	3	20.3	20.5667	4.86	3.9	0.98658	0.7917	1.77828	438	0.9125	-54	2016-09-11		66	32.4	4.02	3.57	503	2016-08-22		117	14.9	5.44	3.88	504	2016-08-29		119	27.6	5.09	3.97	435	2016-08-13		125	38.3	4.14	3.38	541	2016-09-02
36		31	4.56	3.64	532	2016-09-17		42	3	20.8	20.7333	4.89	3.92	1.01712	0.81536	1.83248	442	0.920833	-53	2016-09-12		66	30.9	4.28	3.55	498	2016-08-23		117	17.2	5.16	3.87	522	2016-08-30		119	27.3	4.8	4	438	2016-08-14		125	39.4	3.97	3.41	545	2016-09-03
36		32	4.26	3.63	538	2016-09-18		42	3	21.1	21	4.74	3.92	1.00014	0.82712	1.82726	443	0.922917	-52	2016-09-13		66	30.5	4.18	3.51	501	2016-08-24		117	14.3	4.98	3.87	502	2016-08-31		119	26.9	4.77	3.99	442	2016-08-15		125	37.8	4.65	3.45	538	2016-09-04
36		29.8	4.33	3.61	532	2016-09-19		42	3	21.1	21	4.62	3.9	0.97482	0.8229	1.79772	468	0.975	-51	2016-09-14		66	32.6	4	3.48	514	2016-08-25		117	15.8	4.96	3.78	512	2016-09-01		119	27.2	4.82	3.97	430	2016-08-16		125	38.2	4.23	3.44	539	2016-09-05
36		29.9	4.2	3.59	566	2016-09-20		42	3	20.8	20.9667	4.57	3.92	0.95056	0.81536	1.76592	446	0.929167	-50	2016-09-15		66	32.3	3.89	3.47	498	2016-08-26		117	16.3	5.47	3.66	514	2016-09-02		119	27.4	4.71	3.95	440	2016-08-17		125	39.5	4.34	3.41	538	2016-09-06
36		31.1	4.24	3.6	538	2016-09-21		42	3	21	21.3333	4.3	3.96	0.903	0.8316	1.7346	442	0.920833	-49	2016-09-16		66	31.7	4.05	3.42	503	2016-08-27		117	17.1	4.97	3.71	505	2016-09-03		119	28.6	4.73	3.98	449	2016-08-18		125	39.8	4.29	3.4	542	2016-09-07
36		30.7	4.27	3.56	538	2016-09-22		42	3	22.2	21.3667	4.21	3.98	0.93462	0.88356	1.81818	447	0.93125	-48	2016-09-17		66	33.1	4.25	3.37	496	2016-08-28		117	17	4.73	3.74	502	2016-09-04		119	27.6	4.55	4.02	437	2016-08-19		125	36.2	4.35	3.39	536	2016-09-08
36		30.6	4.3	3.6	537	2016-09-23		42	3	20.9	21.3667	3.94	3.93	0.82346	0.82137	1.64483	449	0.935417	-47	2016-09-18		66	33.9	4.21	3.34	492	2016-08-29		117	17.8	5.04	3.8	505	2016-09-05		119	22.8	4.8	3.98	427	2016-08-20		125	38.4	4.28	3.3	517	2016-09-09
36		28.9	4.16	3.58	542	2016-09-24		42	3	21	20.9667	3.92	3.94	0.8232	0.8274	1.6506	446	0.929167	-46	2016-09-19		66	32.9	4.02	3.38	494	2016-08-30		117	16.7	4.92	3.79	503	2016-09-06		119	25.9	4.93	3.87	496	2016-08-21		125	37.2	4.48	3.27	544	2016-09-10
36		29.8	4.26	3.48	530	2016-09-25		42	3	21	20.8333	4.22	3.89	0.8862	0.8169	1.7031	447	0.93125	-45	2016-09-20		66	32.9	3.79	3.3	485	2016-08-31		117	16.8	5.03	3.69	514	2016-09-07		119	27	4.82	3.77	453	2016-08-22		125	37.7	4.22	3.33	525	2016-09-11
36		27.2	4.13	3.42	547	2016-09-26		42	3	20.5	21.0333	4.26	3.85	0.8733	0.78925	1.66255	447	0.93125	-44	2016-09-21		66	33.2	3.74	3.29	497	2016-09-01		117	17.7	4.67	3.65	510	2016-09-08		119	27	4.77	3.76	430	2016-08-23		125	36.4	4.09	3.41	541	2016-09-12
36		28.5	4.13	3.4	540	2016-09-27		42	3	21.6	21.2	3.89	3.79	0.84024	0.81864	1.65888	459	0.95625	-43	2016-09-22		66	32.5	3.94	3.26	489	2016-09-02		117	16.3	4.72	3.61	512	2016-09-09		119	28.1	4.86	3.82	463	2016-08-24		125	36.7	3.72	3.38	537	2016-09-13
36		29.2	3.72	3.5	543	2016-09-28		42	3	21.5	21.4667	3.74	3.86	0.8041	0.8299	1.634	456	0.95	-42	2016-09-23		66	30.9	3.93	3.27	495	2016-09-03		117	16.5	4.84	3.53	505	2016-09-10		119	26.9	4.93	3.85	438	2016-08-25		125	35.8	3.72	3.36	545	2016-09-14
36		29.2	4.37	3.54	546	2016-09-29		42	3	21.3	21.1333	3.78	3.92	0.80514	0.83496	1.6401	456	0.95	-41	2016-09-24		66	33.6	3.66	3.21	492	2016-09-04		117	17.2	5.09	3.57	508	2016-09-11		119	28.7	4.93	3.85	434	2016-08-26		125	36.2	3.91	3.36	522	2016-09-15
36		29	4.32	3.51	545	2016-09-30		42	3	20.6	21.1667	3.9	3.9	0.8034	0.8034	1.6068	459	0.95625	-40	2016-09-25		66	32.6	3.74	3.21	501	2016-09-05		117	17.9	4.64	3.61	501	2016-09-12		119	27.8	4.89	3.82	425	2016-08-27		125	26.5	4.41	3.29	540	2016-09-16
36		29.1	4.64	3.55	550	2016-10-01		42	3	21.6	21.4333	4.38	3.89	0.94608	0.84024	1.78632	461	0.960417	-39	2016-09-26		66	32	3.77	3.15	492	2016-09-06		117	18.8	4.79	3.65	505	2016-09-13		119	27.4	4.81	3.83	433	2016-08-28		125	33.6	4.6	3.27	535	2016-09-17
36		28.9	4.29	3.59	549	2016-10-02		42	3	22.1	21.4	4.22	3.87	0.93262	0.85527	1.78789	462	0.9625	-38	2016-09-27		66	30.7	3.74	3.09	492	2016-09-07		117	17.9	4.74	3.65	506	2016-09-14		119	27.5	4.69	3.83	532	2016-08-29		125	39.6	4.71	3.37	542	2016-09-18
36		29	4.4	3.53	566	2016-10-03		42	3	20.5	20.8667	4.11	3.9	0.84255	0.7995	1.64205	459	0.95625	-37	2016-09-28		66	31.4	3.78	3.02	495	2016-09-08		117	18.2	4.9	3.64	500	2016-09-15		119	27.5	4.41	3.85	446	2016-08-30		125	35.9	4.96	3.41	530	2016-09-19
36		30.3	4.67	3.52	545	2016-10-04		42	3	20	20.4667	4.08	3.92	0.816	0.784	1.6	467	0.972917	-36	2016-09-29		66	31.2	3.41	3.09	493	2016-09-09		117	12.6	5.1	3.59	500	2016-09-16		119	27.7	4.52	3.85	448	2016-08-31		125	36.5	4.8	3.43	534	2016-09-20
36		30.1	4.58	3.52	518	2016-10-05		42	3	20.9	20.5667	4.2	3.86	0.8778	0.80674	1.68454	463	0.964583	-35	2016-09-30		66	31.1	3.81	3.1	494	2016-09-10		117	17	4.88	3.31	502	2016-09-17		119	27.7	4.54	3.82	436	2016-09-01		125	37	4.29	3.42	540	2016-09-21
36		29.4	4.51	3.44	529	2016-10-06		42	3	20.8	20.8	4.05	3.87	0.8424	0.80496	1.64736	469	0.977083	-34	2016-10-01		66	31.3	3.57	3.14	493	2016-09-11		117	18.4	4.69	3.3	559	2016-09-18		119	27.1	4.65	3.82	434	2016-09-02		125	37.9	4.15	3.42	547	2016-09-22
36		30.2	4.41	3.53	536	2016-10-07		42	3	20.7	20.6333	4.02	3.83	0.83214	0.79281	1.62495	499	1.03958	-33	2016-10-02		66	32.4	3.89	3.11	493	2016-09-12		117	19	5.14	3.52	505	2016-09-19		119	28	4.86	3.82	428	2016-09-03		125	36.8	3.86	3.45	557	2016-09-23
36		28.7	4.52	3.58	536	2016-10-08		42	3	20.4	20.4333	4.5	3.78	0.918	0.77112	1.68912	461	0.960417	-32	2016-10-03		66	32.7	3.79	3.13	493	2016-09-13		117	18.5	4.87	3.51	505	2016-09-20		119	28	4.8	3.85	431	2016-09-04		125	37	3.92	3.43	547	2016-09-24
36		29	4.3	3.5	537	2016-10-09		42	3	20.2	20.3	3.98	3.73	0.80396	0.75346	1.55742	460	0.958333	-31	2016-10-04		66	30.9	3.86	3.09	493	2016-09-14		117	17.9	4.77	3.51	503	2016-09-21		119	28.5	4.99	3.81	436	2016-09-05		125	32.6	3.7	3.36	547	2016-09-25
36		27.7	4.3	3.52	535	2016-10-10		42	3	20.3	20.4667	3.78	3.75	0.76734	0.76125	1.52859	455	0.947917	-30	2016-10-05		66	32.7	3.67	3.16	502	2016-09-15		117	18.2	4.85	3.46	501	2016-09-22		119	27.9	4.6	3.81	434	2016-09-06		125	33.4	3.58	3.37	554	2016-09-26
36		27.4	4.51	3.48	532	2016-10-11		42	3	20.9	20.9333	3.99	3.81	0.83391	0.79629	1.6302	464	0.966667	-29	2016-10-06		66	31.5	3.81	3.22	521	2016-09-16		117	18.7	4.58	3.46	506	2016-09-23		119	28.1	4.68	3.79	424	2016-09-07		125	35.1	4.26	3.31	538	2016-09-27
36		26.8	4.24	3.44	531	2016-10-12		42	3	21.6	21	3.87	3.85	0.83592	0.8316	1.66752	465	0.96875	-28	2016-10-07		66	33.1	3.3	3.11	492	2016-09-17		117	18.2	4.27	3.49	500	2016-09-24		119	26.2	4.91	3.78	497	2016-09-08		125	35.7	3.85	3.3	516	2016-09-28
36		29.2	4.19	3.46	545	2016-10-13		42	3	20.5	21.1667	3.87	3.83	0.79335	0.78515	1.5785	466	0.970833	-27	2016-10-08		66	34.2	3.49	3.13	488	2016-09-18		117	17.8	4.28	3.5	509	2016-09-25		119	25.2	4.81	3.68	405	2016-09-09		125	34.6	4.21	3.37	538	2016-09-29
36		27.9	4.43	3.41	554	2016-10-14		42	3	21.4	20.7667	4.01	3.85	0.85814	0.8239	1.68204	463	0.964583	-26	2016-10-09		66	33.5	3.47	3.14	491	2016-09-19		117	16.9	4.52	3.49	519	2016-09-26		119	27.2	5.14	3.59	437	2016-09-10		125	34.8	4.28	3.39	610	2016-09-30
36		30	4.56	3.44	544	2016-10-15		42	3	20.4	20.5333	3.71	3.89	0.75684	0.79356	1.5504	455	0.947917	-25	2016-10-10		66	32.5	4.08	3.02	481	2016-09-20		117	17.7	4.75	3.46	535	2016-09-27		119	27	4.94	3.73	437	2016-09-11		125	32.6	4.22	3.42	558	2016-10-01
36		28.9	4.47	3.48	551	2016-10-16		42	3	19.8	19.8	4.1	3.92	0.8118	0.77616	1.58796	466	0.970833	-24	2016-10-11		66	30	3.44	2.97	488	2016-09-21		117	17.9	4.78	3.39	509	2016-09-28		119	27.5	4.87	3.79	435	2016-09-12		125	33.6	3.88	3.45	557	2016-10-02
36		26.5	4.58	3.5	537	2016-10-17		42	3	19.2	20.1667	3.98	3.9	0.76416	0.7488	1.51296	471	0.98125	-23	2016-10-12		66	33.7	3.61	2.94	510	2016-09-22		117	17.9	4.61	3.44	501	2016-09-29		119	27.1	4.68	3.79	439	2016-09-13		125	34.4	4.15	3.39	558	2016-10-03
36		27.1	4.34	3.49	552	2016-10-18		42	3	21.5	20.5333	3.82	3.86	0.8213	0.8299	1.6512	484	1.00833	-22	2016-10-13		66	31.7	3.51	3.06	526	2016-09-23		117	17.4	5.05	3.49	512	2016-09-30		119	27.3	4.82	3.78	438	2016-09-14		125	33.6	4.43	3.38	547	2016-10-04
36		27.8	4.48	3.44	539	2016-10-19		42	3	20.9	21.2333	4.35	3.92	0.90915	0.81928	1.72843	497	1.03542	-21	2016-10-14		66	32.7	3.56	3.09	509	2016-09-24		117	17	4.87	3.49	522	2016-10-01		119	27.9	4.98	3.77	436	2016-09-15		125	34.9	4.55	3.45	561	2016-10-05
36		27.4	4.5	3.4	537	2016-10-20		42	3	21.3	20.7667	4.06	3.87	0.86478	0.82431	1.68909	477	0.99375	-20	2016-10-15		66	31.1	3.48	3.07	501	2016-09-25		117	18	4.9	3.43	522	2016-10-02		119	25.5	4.52	3.81	440	2016-09-16		125	34	4.24	3.43	531	2016-10-06
36		27.4	4.44	3.4	548	2016-10-21		42	3	20.1	20.7667	4.31	3.92	0.86631	0.78792	1.65423	485	1.01042	-19	2016-10-16		66	31.7	3.8	3.07	492	2016-09-26		117	18.8	4.93	3.4	516	2016-10-03		119	27.6	4.52	3.84	446	2016-09-17		125	37.2	4.3	3.49	564	2016-10-07
36		26.8	4.36	3.4	538	2016-10-22		42	3	20.9	20.6	4.42	3.9	0.92378	0.8151	1.73888	488	1.01667	-18	2016-10-17		66	31.3	3.66	3.07	490	2016-09-27		117	19.4	5.02	3.48	517	2016-10-04		119	28.6	4.26	3.73	440	2016-09-18		125	34.9	4.64	3.5	553	2016-10-08
36		27.3	4.23	3.43	534	2016-10-23		42	3	20.8	20.8667	4.43	3.91	0.92144	0.81328	1.73472	479	0.997917	-17	2016-10-18		66	30.6	3.62	3.08	495	2016-09-28		117	18.5	4.93	3.52	517	2016-10-05		119	28.3	4.63	3.79	445	2016-09-19		125	34.8	4.65	3.44	550	2016-10-09
36		28.1	4.39	3.44	546	2016-10-24		42	3	20.9	20.9	4.31	3.9	0.90079	0.8151	1.71589	488	1.01667	-16	2016-10-19		66	30.6	3.72	3.13	511	2016-09-29		117	17.2	4.85	3.53	514	2016-10-06		119	27.5	4.6	3.81	445	2016-09-20		125	32.7	4.37	3.36	530	2016-10-10
36		27.2	4.3	3.45	546	2016-10-25		42	3	21	20.9333	4.37	3.89	0.9177	0.8169	1.7346	495	1.03125	-15	2016-10-20		66	31	3.45	3.07	502	2016-09-30		117	14.4	4.78	3.49	500	2016-10-07		119	27.5	4.93	3.77	439	2016-09-21		125	32.3	4.25	3.31	543	2016-10-11
36		26.5	4.42	3.3	517	2016-10-26		42	3	20.9	20.7	4.01	3.84	0.83809	0.80256	1.64065	470	0.979167	-14	2016-10-21		66	31.2	3.54	3.08	496	2016-10-01		117	16.5	5.01	3.3	511	2016-10-08		119	27.3	4.76	3.78	446	2016-09-22		125	31	4.35	3.32	528	2016-10-12
36		26.4	4.55	3.37	541	2016-10-27		42	3	20.2	20.5667	3.91	3.84	0.78982	0.77568	1.5655	482	1.00417	-13	2016-10-22		66	31.2	3.65	3.09	498	2016-10-02		117	18	4.86	3.23	511	2016-10-09		119	26.4	4.64	3.79	444	2016-09-23		125	34.1	4.27	3.42	545	2016-10-13
36		26.7	4.36	3.46	564	2016-10-28		42	3	20.6	20.3	4.62	3.88	0.95172	0.79928	1.751	482	1.00417	-12	2016-10-23		66	31.3	3.77	3.09	499	2016-10-03		117	17.4	4.75	3.29	515	2016-10-10		119	26.7	4.6	3.74	466	2016-09-24		125	34.6	4.58	3.38	537	2016-10-14
36		27.7	4.14	3.42	540	2016-10-29		42	3	20.1	20.4333	4.93	3.86	0.99093	0.77586	1.76679	472	0.983333	-11	2016-10-24		66	28.9	3.48	3.11	492	2016-10-04		117	17.5	4.74	3.37	510	2016-10-11		119	25.8	4.68	3.75	443	2016-09-25		125	34.4	4.2	3.44	564	2016-10-15
36		28.2	4.31	3.48	541	2016-10-30		42	3	20.6	20.6333	4.53	3.81	0.93318	0.78486	1.71804	472	0.983333	-10	2016-10-25		66	32.9	3.88	3.09	501	2016-10-05		117	16.8	5	3.34	512	2016-10-12		119	26.2	4.65	3.79	450	2016-09-26		125	34.3	3.93	3.44	552	2016-10-16
36		28.9	4.41	3.57	551	2016-10-31		42	3	21.2	21.1667	4.54	3.76	0.96248	0.79712	1.7596	484	1.00833	-9	2016-10-26		66	31.3	3.57	3.07	504	2016-10-06		117	17.6	4.78	3.3	546	2016-10-13		119	26.3	5.17	3.77	437	2016-09-27		125	33.6	4.24	3.48	638	2016-10-17
36		28.5	4.43	3.59	542	2016-11-01		42	3	21.7	21.2	4.59	3.8	0.99603	0.8246	1.82063	499	1.03958	-8	2016-10-27		66	31.1	3.24	3.12	498	2016-10-07		117	18.4	4.74	3.35	516	2016-10-14		119	24.3	5.03	3.71	418	2016-09-28		125	33.9	4.12	3.44	549	2016-10-18
36		26.3	4.62	3.64	545	2016-11-02		42	3	20.7	21.2333	4.32	3.83	0.89424	0.79281	1.68705	493	1.02708	-7	2016-10-28		66	30.1	3.59	3.13	490	2016-10-08		117	18.6	5.11	3.48	519	2016-10-15		119	25.2	5.16	3.66	435	2016-09-29		125	31.4	3.94	3.39	547	2016-10-19
36		27.8	4.58	3.59	535	2016-11-03		42	3	21.3	21.1333	4.14	3.86	0.88182	0.82218	1.704	469	0.977083	-6	2016-10-29		66	30.9	3.54	3.08	491	2016-10-09		117	18.7	4.84	3.48	522	2016-10-16		119	26.2	4.89	3.7	439	2016-09-30		125	27.3	3.03	3.29	560	2016-10-20
36		27.5	4.34	3.6	539	2016-11-04		42	3	21.4	21.2333	4.25	3.91	0.9095	0.83674	1.74624	481	1.00208	-5	2016-10-30		66	31.1	3.42	3.14	493	2016-10-10		117	17.8	4.8	3.48	523	2016-10-17		119	25.8	4.83	3.77	440	2016-10-01		125	29.3	3.25	3.23	535	2016-10-21
36		27.9	4.51	3.66	531	2016-11-05		42	3	21	21.2	4.41	3.91	0.9261	0.8211	1.7472	483	1.00625	-4	2016-10-31		66	29.6	3.82	3.05	484	2016-10-11		117	18.4	4.97	3.49	520	2016-10-18		119	25.3	4.51	3.78	443	2016-10-02		125	6.7	3.38	3.43	513	2016-10-22
36		26.2	4.54	3.64	538	2016-11-06		42	3	21.2	21.1333	4.6	3.91	0.9752	0.82892	1.80412	482	1.00417	-3	2016-11-01		66	28.7	3.53	3.06	485	2016-10-12		117	16.9	4.87	3.48	533	2016-10-19		119	25.7	4.8	3.72	445	2016-10-03		125	7.2	4.63	3.55	532	2016-10-23
36		26.5	4.55	3.57	528	2016-11-07		42	3	21.2	21.5	4.78	3.93	1.01336	0.83316	1.84652	488	1.01667	-2	2016-11-02		66	31.8	3.43	3.03	485	2016-10-13		117	17.8	4.86	3.46	516	2016-10-20		119	25.5	4.84	3.7	445	2016-10-04		125	11	5.13	3.53	514	2016-10-24
36		27.8	4.28	3.54	544	2016-11-08		42	3	22.1	21.8667	4.5	3.95	0.9945	0.87295	1.86745	478	0.995833	-1	2016-11-03		66	31.5	3.23	3.09	493	2016-10-14		117	17.6	4.86	3.46	522	2016-10-21		119	26.4	4.8	3.74	443	2016-10-05		125	8.6	5.35	3.42	491	2016-10-25
36		27.4	4.54	3.59	547	2016-11-09		42	3	22.3	22.2333	4.35	4.01	0.97005	0.89423	1.86428	480	1	0	2016-11-04		66	29.8	3.32	3.16	490	2016-10-15		117	18.4	4.73	3.38	520	2016-10-22		119	27	4.64	3.76	444	2016-10-06		125	13.1	4.95	3.07	502	2016-10-26
36		25.8	4.57	3.68	536	2016-11-10		42	3	22.3	21.9667	4.83	4.08	1.07709	0.90984	1.98693	481	1.00208	1	2016-11-05		66	32.4	3.39	3.08	495	2016-10-16		117	17.5	4.86	3.36	515	2016-10-23		119	27.4	4.58	3.78	449	2016-10-07		125	19.1	4.73	3.06	514	2016-10-27
36		25.1	4.6	3.67	534	2016-11-11		42	3	21.3	21.6333	5.24	4.15	1.11612	0.88395	2.00007	475	0.989583	2	2016-11-06		66	30.9	3.32	3.06	509	2016-10-17		117	17.6	4.88	3.43	506	2016-10-24		119	26.3	4.84	3.82	445	2016-10-08		125	21.2	4.74	3.38	523	2016-10-28
36		26.2	4.67	3.65	540	2016-11-12		42	3	21.3	21.3333	4.73	4.09	1.00749	0.87117	1.87866	483	1.00625	3	2016-11-07		66	31.1	3.68	2.99	500	2016-10-18		117	17.4	4.85	3.45	512	2016-10-25		119	25.4	4.61	3.85	442	2016-10-09		125	23.2	4.72	3.63	528	2016-10-29
36		26.6	4.38	3.7	546	2016-11-13		42	3	21.4	21.5667	4.64	4.09	0.99296	0.87526	1.86822	477	0.99375	4	2016-11-08		66	32	3.49	3.01	494	2016-10-19		117	17.2	4.64	3.42	510	2016-10-26		119	25.1	4.95	3.78	441	2016-10-10		125	23.9	4.36	3.73	537	2016-10-30
36		28.2	4.57	3.74	537	2016-11-14		42	3	22	21.3667	4.68	4.1	1.0296	0.902	1.9316	497	1.03542	5	2016-11-09		66	30.8	3.48	3.03	492	2016-10-20		117	18	4.48	3.42	509	2016-10-27		119	23.9	5.13	3.76	505	2016-10-11		125	26.7	4.75	3.76	542	2016-10-31
36		27.4	4.66	3.79	532	2016-11-15		42	3	20.7	21.5667	5.17	4.22	1.07019	0.87354	1.94373	487	1.01458	6	2016-11-10		66	30.7	3.83	2.99	497	2016-10-21		117	18.1	4.64	3.43	519	2016-10-28		119	22.5	4.8	3.78	455	2016-10-12		125	26.4	4.46	3.78	537	2016-11-01
36		26.7	4.77	3.85	552	2016-11-16		42	3	22	21.1333	5.28	4.23	1.1616	0.9306	2.0922	492	1.025	7	2016-11-11		66	29.9	3.91	2.97	511	2016-10-22		117	18.2	4.99	3.41	524	2016-10-29		119	25.4	4.78	3.7	446	2016-10-13		125	26.9	4.73	3.85	525	2016-11-02
36		26	4.72	3.8	590	2016-11-17		42	3	20.7	21.6	5.16	4.25	1.06812	0.87975	1.94787	499	1.03958	8	2016-11-12		66	29.9	3.74	2.97	494	2016-10-23		117	14.8	5.12	3.39	504	2016-10-30		119	24.8	4.57	3.73	478	2016-10-14		125	28.9	4.52	3.75	504	2016-11-03
36		25.3	5.03	3.81	547	2016-11-18		42	3	22.1	21.5	5.42	4.26	1.19782	0.94146	2.13928	487	1.01458	9	2016-11-13		66	28.4	3.44	3.07	500	2016-10-24		117	18.3	5.15	3.37	563	2016-10-31		119	25.4	4.81	3.74	449	2016-10-15		125	28.7	4.35	3.8	539	2016-11-04
36		25.5	5.35	3.89	536	2016-11-19		42	3	21.7	21.9667	5.49	4.34	1.19133	0.94178	2.13311	496	1.03333	10	2016-11-14		66	29.6	3.45	3	489	2016-10-25		117	17.9	4.86	3.39	516	2016-11-01		119	25.1	4.98	3.74	444	2016-10-16		125	29.6	4.69	3.86	527	2016-11-05
36		25	5.21	3.85	537	2016-11-20		42	3	22.1	21.6333	5.67	4.38	1.25307	0.96798	2.22105	494	1.02917	11	2016-11-15		66	30.4	3.74	3.03	506	2016-10-26		117	17.8	4.89	3.46	517	2016-11-02		119	21.6	5.1	3.74	425	2016-10-17		125	28.3	4.52	3.81	527	2016-11-06
36		24.6	5.15	3.8	547	2016-11-21		42	3	21.1	21.6	5.69	4.45	1.20059	0.93895	2.13954	489	1.01875	12	2016-11-16		66	31.6	3.79	3.06	506	2016-10-27		117	16.4	4.71	3.5	530	2016-11-03		119	23.9	5.47	3.62	441	2016-10-18		125	29.7	4.39	3.74	529	2016-11-07
[truncated: 344 more rows]
[truncated: 146 more columns]

## Sheet: Jan-feb 2018
Animal Number	Parity	Day Production	Smoothed production	Fat indication	Protein indication	Fat yield	Protein Yield	MS total	Weight	Days from peak	Date		Animal Number	Parity	Day Production	Smoothed production	Fat indication	Protein indication	Fat yield	Protein Yield	MS total	Weight	Days from peak	Date		Animal Number	Parity	Day Production	Smoothed production	Fat indication	Protein indication	Fat yield	Protein Yield	MS total	Weight	Days from peak	Date		Animal Number	Parity	Day Production	Smoothed production	Fat indication	Protein indication	Fat yield	Protein Yield	MS total	Weight	Days from peak
[truncated: 349 more rows]
[truncated: 241 more columns]

[truncated: 22 more sheets: Sept-Oct 2016, Nov-Dec 2016, Jan-feb 2017, Mar-apr 2017, May-Jun 2017, Jul-Aug 2017, Sept-Oct 2017, Nov-Dec 2017, Mar-Apr 2018, May-June 2018, July-Aug 2018, Sept-Oct 2018, Nov - Dec 2018, November 2018, December 2018, January 2019, Milk Yield vs Parity summary, Parity 1, Parity 2, Parity 3 …]
