# Supplementary material for: An agroecological approach to preparation and use of a milk protein production baseline
Source: PeerJ. 2024 Sep 23;12:e18103. doi: 10.7717/peerj.18103 (PMC11426323; doi:10.7717/peerj.18103)
Supplement: Supplemental Information 4 — The data were translated from the robotic milking system using Quattro Pro version 9, then subsampled to an Excel spreadsheet for further manipulation and analysis. [file peerj-12-18103-s004.xls]

## Sheet: January 2016
Animal Number	Day Production	Fat indication	Protein indication	Weight	Date
27	26			483	2016-01-01
47	17.2			569	2016-01-01
125	26			553	2016-01-01
144					2016-01-01
253	12.8			532	2016-01-01
274	33.3			490	2016-01-01
192	20.6			552	2016-01-01
200	19.9			579	2016-01-01
361					2016-01-01
11	19.4			464	2016-01-01
466	19.2			558	2016-01-01
483	28			451	2016-01-01
632	24.1			537	2016-01-01
380	20.7			491	2016-01-01
8	25.7			542	2016-01-01
181	28.9			502	2016-01-01
24	20.5				2016-01-01
36	24.1			533	2016-01-01
37	13.4			583	2016-01-01
134	37.5			605	2016-01-01
209	32.7			539	2016-01-01
281					2016-01-01
269	16.3			491	2016-01-01
306	13.8				2016-01-01
54	23.5			450	2016-01-01
537	21.2			455	2016-01-01
113	9.9				2016-01-01
403	11.3				2016-01-01
188					2016-01-01
146	19.5			483	2016-01-01
384	22.6			522	2016-01-01
494	17.6			504	2016-01-01
183	22.4				2016-01-01
86	33.8			482	2016-01-01
543	23.4			532	2016-01-01
544	12.6			504	2016-01-01
547	23.2			508	2016-01-01
241	18.3			459	2016-01-01
410	18.4			517	2016-01-01
342	27.9			658	2016-01-01
173	35.9			497	2016-01-01
504	15.7				2016-01-01
179	13.4			442	2016-01-01
389	19.6				2016-01-01
2	22.2			481	2016-01-01
66	24.7			506	2016-01-01
119	21.7			417	2016-01-01
366	31.3			448	2016-01-01
369	19			470	2016-01-01
556	11.4			518	2016-01-01
291	21.2				2016-01-01
352	18				2016-01-01
292	19			452	2016-01-01
100	23.1			554	2016-01-01
490	21.2			573	2016-01-01
42	17.6			507	2016-01-01
406	25.4			515	2016-01-01
239	21.8				2016-01-01
103	19.2			453	2016-01-01
508					2016-01-01
195					2016-01-01
219					2016-01-01
267					2016-01-01
382					2016-01-01
477					2016-01-01
377					2016-01-01
216	20.8			432	2016-01-01
344	11.6			560	2016-01-01
74	21.2			540	2016-01-01
319					2016-01-01
90	32.1			536	2016-01-01
98	25.2				2016-01-01
236					2016-01-01
265	23.1			385	2016-01-01
193	17.4			425	2016-01-01
288					2016-01-01
233	18.4			477	2016-01-01
437					2016-01-01
385	19.4			585	2016-01-01
443	19.6			381	2016-01-01
299					2016-01-01
454	25.1			482	2016-01-01
553	21.7			471	2016-01-01
424					2016-01-01
643	30			403	2016-01-01
484	20.9			422	2016-01-01
89	17.2			522	2016-01-01
150					2016-01-01
645	22.3			425	2016-01-01
38	22.8				2016-01-01
457					2016-01-01
248					2016-01-01
170	25.5			537	2016-01-01
640	25			498	2016-01-01
60	28			478	2016-01-01
106					2016-01-01
379	25.2			559	2016-01-01
12					2016-01-01
451					2016-01-01
517	16.3			410	2016-01-01
636	28.6			452	2016-01-01
634	22			574	2016-01-01
631	15.5				2016-01-01
629	21.9			483	2016-01-01
627					2016-01-01
624	29.3			482	2016-01-01
622	27.7			567	2016-01-01
618	27.4			538	2016-01-01
579					2016-01-01
140					2016-01-01
523					2016-01-01
211					2016-01-01
375					2016-01-01
234					2016-01-01
359					2016-01-01
121					2016-01-01
392					2016-01-01
278					2016-01-01
346					2016-01-01
135	24.6			507	2016-01-01
132					2016-01-01
212	16.2				2016-01-01
535	15.2				2016-01-01
257					2016-01-01
453					2016-01-01
58					2016-01-01
323					2016-01-01
602					2016-01-01
485					2016-01-01
205					2016-01-01
114					2016-01-01
540					2016-01-01
411					2016-01-01
246					2016-01-01
528	14.6				2016-01-01
441					2016-01-01
63					2016-01-01
546					2016-01-01
287					2016-01-01
492					2016-01-01
45					2016-01-01
247					2016-01-01
336					2016-01-01
400					2016-01-01
435					2016-01-01
177	20.4			460	2016-01-01
616					2016-01-01
1	18.6				2016-01-01
393					2016-01-01
518					2016-01-01
251	12				2016-01-01
548	15.9			452	2016-01-01
447					2016-01-01
491	18				2016-01-01
158	18.7			541	2016-01-01
427	18			386	2016-01-01
418	18.9			473	2016-01-01
603	15.2			419	2016-01-01
604	13.7			394	2016-01-01
107					2016-01-01
396	12			503	2016-01-01
608					2016-01-01
92	11.3				2016-01-01
310					2016-01-01
356	13.9				2016-01-01
169					2016-01-01
470					2016-01-01
104					2016-01-01
426					2016-01-01
425					2016-01-01
480					2016-01-01
499					2016-01-01
433	12.4			457	2016-01-01
450	15.5				2016-01-01
6					2016-01-01
423					2016-01-01
335					2016-01-01
590					2016-01-01
407					2016-01-01
354					2016-01-01
118	10.1			497	2016-01-01
311	32.1			497	2016-01-01
421	18.7			586	2016-01-01
314	18.1			454	2016-01-01
245	18.7			638	2016-01-01
614	29.9			525	2016-01-01
95					2016-01-01
204	14			488	2016-01-01
78	24.3			519	2016-01-01
428	16.1			472	2016-01-01
414	14.9				2016-01-01
139	20.4			398	2016-01-01
178					2016-01-01
625	15.9			363	2016-01-01
598	18.6			359	2016-01-01
597	17.1			297	2016-01-01
208					2016-01-01
343					2016-01-01
64	15.8				2016-01-01
117	20.8			439	2016-01-01
180	16.7			436	2016-01-01
145	16			400	2016-01-01
633	15.3			485	2016-01-01
46	13.6			471	2016-01-01
277	16			338	2016-01-01
21					2016-01-01
264	18.3			378	2016-01-01
596	21.6			407	2016-01-01
175					2016-01-01
650	12.6				2016-01-01
142					2016-01-01
161	19.1			444	2016-01-01
194					2016-01-01
573					2016-01-01
599	12.7			385	2016-01-01
565	21.9			388	2016-01-01
82	20.2			410	2016-01-01
4	15.1			338	2016-01-01
476					2016-01-01
430					2016-01-01
498	15.2			427	2016-01-01
76	18			426	2016-01-01
84	16.2				2016-01-01
18					2016-01-01
532					2016-01-01
124					2016-01-01
32					2016-01-01
459					2016-01-01
355					2016-01-01
413	21				2016-01-01
545					2016-01-01
474					2016-01-01
404					2016-01-01
112	22			458	2016-01-01
91					2016-01-01
268	21.3			382	2016-01-01
232	13.7			472	2016-01-01
153	23.8			426	2016-01-01
109	10.6			375	2016-01-01
40					2016-01-01
61	22.2			396	2016-01-01
68	21.2			390	2016-01-01
286					2016-01-01
394					2016-01-01
52	17.2			505	2016-01-01
617	22.6			519	2016-01-01
460	26.9			496	2016-01-01
307	17.3			505	2016-01-01
99					2016-01-01
273	21.2			438	2016-01-01
295	17.2				2016-01-01
541					2016-01-01
22					2016-01-01
589	15.5			450	2016-01-01
159	13.9			348	2016-01-01
14					2016-01-01
519					2016-01-01
398					2016-01-01
258					2016-01-01
87					2016-01-01
214					2016-01-01
360					2016-01-01
405					2016-01-01
338					2016-01-01
235	7.8				2016-01-01
254	6.4				2016-01-01
189					2016-01-01
164					2016-01-01
381					2016-01-01
101					2016-01-01
70					2016-01-01
431					2016-01-01
530					2016-01-01
324					2016-01-01
225					2016-01-01
27	24.6			492	2016-01-02
47	18.4				2016-01-02
125	25.6			544	2016-01-02
144					2016-01-02
253	13.5				2016-01-02
274	33				2016-01-02
192	19.8				2016-01-02
200	19.6			584	2016-01-02
361					2016-01-02
11	14.5			460	2016-01-02
466	18.3				2016-01-02
483	28.2			452	2016-01-02
632	23.3			537	2016-01-02
380	21.6				2016-01-02
8	24.3				2016-01-02
181	28.3			507	2016-01-02
24	19.7			639	2016-01-02
36	24.8			512	2016-01-02
37	12.9				2016-01-02
134	29.7			610	2016-01-02
209	30.4			543	2016-01-02
281					2016-01-02
269	16.8			491	2016-01-02
306	12.5			472	2016-01-02
54	22.6			457	2016-01-02
537	20			451	2016-01-02
113	20.3			355	2016-01-02
403	10.6			535	2016-01-02
188					2016-01-02
146	18.8			481	2016-01-02
384	20.9				2016-01-02
494	17.4				2016-01-02
183	22.7			584	2016-01-02
86	33.4			470	2016-01-02
543	21.1			545	2016-01-02
544	11.5			523	2016-01-02
547	23.9			471	2016-01-02
241	13.9				2016-01-02
410	18.4			522	2016-01-02
342	29.4			669	2016-01-02
173	36.9			495	2016-01-02
504	14.8			426	2016-01-02
179	13.8			447	2016-01-02
389	18.7			470	2016-01-02
2	25.4				2016-01-02
66	23.9			505	2016-01-02
119	22.6			425	2016-01-02
366	33.2			447	2016-01-02
369	19.7			467	2016-01-02
556	11.2				2016-01-02
291	21.9			519	2016-01-02
352	17			551	2016-01-02
292	13.8			444	2016-01-02
100	22.5				2016-01-02
490	18.5			564	2016-01-02
42	16.8			504	2016-01-02
406	25				2016-01-02
239	20			445	2016-01-02
103	17.5			448	2016-01-02
508					2016-01-02
195					2016-01-02
219					2016-01-02
267					2016-01-02
382					2016-01-02
477					2016-01-02
377					2016-01-02
216	20.5			423	2016-01-02
344	14				2016-01-02
74	20.9			548	2016-01-02
319					2016-01-02
90	28.9			551	2016-01-02
98	23.2			396	2016-01-02
236					2016-01-02
265	23.2			398	2016-01-02
193	17.3				2016-01-02
288					2016-01-02
233	18			468	2016-01-02
437					2016-01-02
385	20.3			587	2016-01-02
443	20.4			375	2016-01-02
299					2016-01-02
454	25.3			475	2016-01-02
553	21.8			463	2016-01-02
424					2016-01-02
643	30.3			409	2016-01-02
484	22.9			415	2016-01-02
89	17			503	2016-01-02
150					2016-01-02
645	22.3			423	2016-01-02
38	22.3			507	2016-01-02
457					2016-01-02
248					2016-01-02
170	25.5			555	2016-01-02
640	24.7			500	2016-01-02
60	29.9			486	2016-01-02
106					2016-01-02
379	25.8			546	2016-01-02
12					2016-01-02
451					2016-01-02
517	14.1				2016-01-02
636	28.8			446	2016-01-02
634	23.2				2016-01-02
631	14.9			440	2016-01-02
629	22.7			473	2016-01-02
627					2016-01-02
624	28.5				2016-01-02
622	26.7				2016-01-02
618	27			525	2016-01-02
579					2016-01-02
140					2016-01-02
523					2016-01-02
211					2016-01-02
375					2016-01-02
234					2016-01-02
359					2016-01-02
121					2016-01-02
392					2016-01-02
278					2016-01-02
346					2016-01-02
135	25.1			505	2016-01-02
132					2016-01-02
212	16			506	2016-01-02
535	16.4			501	2016-01-02
257					2016-01-02
453					2016-01-02
58					2016-01-02
323					2016-01-02
602					2016-01-02
485					2016-01-02
205					2016-01-02
114					2016-01-02
540					2016-01-02
411					2016-01-02
246					2016-01-02
528	14.9			477	2016-01-02
441					2016-01-02
63					2016-01-02
546					2016-01-02
287					2016-01-02
492					2016-01-02
45					2016-01-02
247					2016-01-02
336					2016-01-02
400					2016-01-02
435					2016-01-02
177	20.3				2016-01-02
616					2016-01-02
1	18.4			433	2016-01-02
393					2016-01-02
518					2016-01-02
251	11.9			490	2016-01-02
548	15.1				2016-01-02
447					2016-01-02
491	19.1			498	2016-01-02
158	16				2016-01-02
427	18				2016-01-02
418	18.8				2016-01-02
603	14.5				2016-01-02
604	12.8				2016-01-02
107					2016-01-02
396	12.8			497	2016-01-02
608					2016-01-02
92	11.4			481	2016-01-02
310					2016-01-02
356	14.6			421	2016-01-02
169					2016-01-02
470					2016-01-02
104					2016-01-02
426					2016-01-02
425					2016-01-02
480					2016-01-02
499					2016-01-02
433	11.7				2016-01-02
450	15.4			603	2016-01-02
6					2016-01-02
423					2016-01-02
335					2016-01-02
590					2016-01-02
407					2016-01-02
354					2016-01-02
118	9.9			511	2016-01-02
311	33.1			495	2016-01-02
421	19.6				2016-01-02
314	17.2				2016-01-02
245	18.8				2016-01-02
614	30.4			511	2016-01-02
95					2016-01-02
204	14			492	2016-01-02
78	24				2016-01-02
428	16				2016-01-02
414	13.8			357	2016-01-02
139	20.2			390	2016-01-02
178					2016-01-02
625	15.7			372	2016-01-02
598	19.3				2016-01-02
597	17.2			298	2016-01-02
208					2016-01-02
343					2016-01-02
64	16.5			360	2016-01-02
117	20.7			437	2016-01-02
180	18.8			430	2016-01-02
145	14.7			392	2016-01-02
633	13.9				2016-01-02
46	13.4			479	2016-01-02
277	14.7				2016-01-02
21					2016-01-02
264	18			374	2016-01-02
596	22.6			404	2016-01-02
175					2016-01-02
650	13			492	2016-01-02
142					2016-01-02
161	19.7			431	2016-01-02
194					2016-01-02
573					2016-01-02
599	12.8			383	2016-01-02
565	19.8				2016-01-02
82	20.1			431	2016-01-02
4	14.3			334	2016-01-02
476					2016-01-02
430					2016-01-02
498	14.9			440	2016-01-02
76	17.7			410	2016-01-02
84	15.8			433	2016-01-02
18					2016-01-02
532					2016-01-02
124					2016-01-02
32					2016-01-02
459					2016-01-02
355					2016-01-02
413	19			415	2016-01-02
545					2016-01-02
474					2016-01-02
404					2016-01-02
112	24.7			465	2016-01-02
91					2016-01-02
268	21.4			389	2016-01-02
232	15.7			536	2016-01-02
153	21.3			430	2016-01-02
109	11.7			361	2016-01-02
40					2016-01-02
61	20.4			429	2016-01-02
68	21.7			388	2016-01-02
286					2016-01-02
394					2016-01-02
52	17.6			497	2016-01-02
617	23.2			535	2016-01-02
460	27			502	2016-01-02
307	19.3			502	2016-01-02
99	12.6				2016-01-02
273	21.2			433	2016-01-02
295	16.9			416	2016-01-02
541					2016-01-02
22					2016-01-02
589	13.1			476	2016-01-02
159	13.8			351	2016-01-02
14					2016-01-02
519					2016-01-02
398					2016-01-02
258					2016-01-02
87					2016-01-02
214					2016-01-02
360					2016-01-02
405					2016-01-02
338					2016-01-02
235	17.2			339	2016-01-02
254	19.6			455	2016-01-02
189					2016-01-02
164					2016-01-02
381					2016-01-02
101					2016-01-02
70					2016-01-02
431					2016-01-02
530					2016-01-02
324					2016-01-02
225					2016-01-02
27	25.3			478	2016-01-03
47	17.6			575	2016-01-03
125	25.9			560	2016-01-03
144					2016-01-03
253	13.7			532	2016-01-03
274	31.4			503	2016-01-03
192	20.3			559	2016-01-03
200	19.7			572	2016-01-03
361					2016-01-03
11	17.6			456	2016-01-03
466	18.2			561	2016-01-03
483	29.7			450	2016-01-03
632	22.9			532	2016-01-03
380	21.2			475	2016-01-03
8	27.2			529	2016-01-03
181	28.4			509	2016-01-03
24	17.6				2016-01-03
36	24.9			521	2016-01-03
37	11.5			572	2016-01-03
134	39.7			595	2016-01-03
209	32.6			533	2016-01-03
281	19.2				2016-01-03
269	16.5			494	2016-01-03
306	11.9			469	2016-01-03
54	23.3			456	2016-01-03
537	20.4			448	2016-01-03
113	13			366	2016-01-03
403	11				2016-01-03
188					2016-01-03
146	19.4			483	2016-01-03
384	21.5			513	2016-01-03
494	18.6			513	2016-01-03
183	21.4			583	2016-01-03
86	33.1			501	2016-01-03
543	23.3			541	2016-01-03
544	12.2			585	2016-01-03
547	24.2			479	2016-01-03
241	18.7			461	2016-01-03
410	18.8			505	2016-01-03
342	27.4			649	2016-01-03
173	34			501	2016-01-03
504	15.1			434	2016-01-03
179	14.6			443	2016-01-03
389	19.2			473	2016-01-03
2	26			473	2016-01-03
66	24.3			517	2016-01-03
119	21.5			434	2016-01-03
366	31.5			444	2016-01-03
369	19.1			458	2016-01-03
556					2016-01-03
291	21.9			510	2016-01-03
352	16.7			551	2016-01-03
292	13.7			444	2016-01-03
100	20.6			534	2016-01-03
490	18.8			573	2016-01-03
42	18.1			509	2016-01-03
406	23.9			506	2016-01-03
239	20.4			445	2016-01-03
103	17.7			452	2016-01-03
508					2016-01-03
195					2016-01-03
219					2016-01-03
267					2016-01-03
382					2016-01-03
477					2016-01-03
377					2016-01-03
216	20.6			434	2016-01-03
344	14			559	2016-01-03
74	20.3			546	2016-01-03
319					2016-01-03
90	34.3			582	2016-01-03
98	22.9				2016-01-03
236					2016-01-03
265	24			400	2016-01-03
193	16.7			431	2016-01-03
288					2016-01-03
233	18.9			535	2016-01-03
437					2016-01-03
385	19.9			585	2016-01-03
443	19.1			381	2016-01-03
299					2016-01-03
454	25.5			483	2016-01-03
553	21.8			465	2016-01-03
424					2016-01-03
643	30			407	2016-01-03
484	23.4			410	2016-01-03
89	19.6			496	2016-01-03
150					2016-01-03
645	23.3			424	2016-01-03
38	21.3				2016-01-03
457					2016-01-03
248					2016-01-03
170	24.8			540	2016-01-03
640	24.4			502	2016-01-03
60	28.5			477	2016-01-03
106					2016-01-03
379	26.1			553	2016-01-03
12					2016-01-03
451					2016-01-03
517	15.5			406	2016-01-03
636	29.4			443	2016-01-03
634	21.7			528	2016-01-03
631	14.9				2016-01-03
629	21.9			477	2016-01-03
627					2016-01-03
624	27.9			488	2016-01-03
622	25.3			560	2016-01-03
618	25.8			477	2016-01-03
579					2016-01-03
140					2016-01-03
523					2016-01-03
211					2016-01-03
375					2016-01-03
234					2016-01-03
359					2016-01-03
121					2016-01-03
392					2016-01-03
278					2016-01-03
346					2016-01-03
135	25.6			499	2016-01-03
132					2016-01-03
212	14.2				2016-01-03
535					2016-01-03
257					2016-01-03
453					2016-01-03
58					2016-01-03
323					2016-01-03
602					2016-01-03
485					2016-01-03
205					2016-01-03
114					2016-01-03
540					2016-01-03
411					2016-01-03
246					2016-01-03
528	14.8			475	2016-01-03
441					2016-01-03
63					2016-01-03
546					2016-01-03
287					2016-01-03
492					2016-01-03
45					2016-01-03
247					2016-01-03
336					2016-01-03
400					2016-01-03
435					2016-01-03
177	20.5			449	2016-01-03
616					2016-01-03
1	18.9				2016-01-03
393					2016-01-03
518					2016-01-03
251	11.7				2016-01-03
548	15.6			457	2016-01-03
447					2016-01-03
491	18.9				2016-01-03
158	18.4			530	2016-01-03
427	17.2			389	2016-01-03
418	18			473	2016-01-03
603	14.4			418	2016-01-03
604	11.1			428	2016-01-03
107					2016-01-03
396	12.5			485	2016-01-03
608					2016-01-03
92	11.2			474	2016-01-03
310					2016-01-03
356	12.3			440	2016-01-03
169					2016-01-03
470					2016-01-03
104					2016-01-03
426					2016-01-03
425					2016-01-03
480					2016-01-03
499					2016-01-03
433	12.3			459	2016-01-03
450	14.9				2016-01-03
6					2016-01-03
423					2016-01-03
335					2016-01-03
590					2016-01-03
407					2016-01-03
354					2016-01-03
118	16.3			512	2016-01-03
311	33.2			502	2016-01-03
421	20.1			573	2016-01-03
314	18			446	2016-01-03
245	15.9			678	2016-01-03
614	28.1			521	2016-01-03
95					2016-01-03
204	13.8			501	2016-01-03
78	23.4			504	2016-01-03
428	16			421	2016-01-03
414	13.8				2016-01-03
139	18.2			388	2016-01-03
178					2016-01-03
625	15.9			373	2016-01-03
598	19			366	2016-01-03
597	17.7			294	2016-01-03
208					2016-01-03
343					2016-01-03
64	15.2				2016-01-03
117	20.7			448	2016-01-03
180	18.2			431	2016-01-03
145	15.6			387	2016-01-03
633	14.3			476	2016-01-03
46	13.4			554	2016-01-03
277	14.7			334	2016-01-03
21					2016-01-03
264	18.1			373	2016-01-03
596	22.3			407	2016-01-03
175					2016-01-03
650	11.8				2016-01-03
142					2016-01-03
161	19.2			442	2016-01-03
194					2016-01-03
573					2016-01-03
599	13.4			386	2016-01-03
565	21			391	2016-01-03
82	20.6			404	2016-01-03
4	14.4			338	2016-01-03
476					2016-01-03
430					2016-01-03
498	15.3			432	2016-01-03
76	17.2			398	2016-01-03
84	15.6			429	2016-01-03
18					2016-01-03
532					2016-01-03
124					2016-01-03
32					2016-01-03
459					2016-01-03
355					2016-01-03
413	20.4			405	2016-01-03
545					2016-01-03
474					2016-01-03
404					2016-01-03
112	24.3			435	2016-01-03
91					2016-01-03
268	21.8			390	2016-01-03
232	18.2			471	2016-01-03
153	21.9			433	2016-01-03
109	8.7			369	2016-01-03
40					2016-01-03
61	20.6			452	2016-01-03
68	22			396	2016-01-03
286					2016-01-03
394					2016-01-03
52	16.3			525	2016-01-03
617	23.7			534	2016-01-03
460	27.2			501	2016-01-03
307	20.6			503	2016-01-03
99	14.1			445	2016-01-03
273	19.5			442	2016-01-03
295	15.7			432	2016-01-03
541					2016-01-03
22					2016-01-03
589	14.4			464	2016-01-03
159	13			354	2016-01-03
14					2016-01-03
519					2016-01-03
398					2016-01-03
258					2016-01-03
87					2016-01-03
214					2016-01-03
360					2016-01-03
405					2016-01-03
338					2016-01-03
235	11.2			360	2016-01-03
254	16			445	2016-01-03
189					2016-01-03
164					2016-01-03
381					2016-01-03
101					2016-01-03
70					2016-01-03
431					2016-01-03
530					2016-01-03
324					2016-01-03
225					2016-01-03
27	25.6			481	2016-01-04
47	21.3			572	2016-01-04
125	24.8			548	2016-01-04
144					2016-01-04
253	13.6			537	2016-01-04
274	32			485	2016-01-04
192	21.5			552	2016-01-04
200	19.8			576	2016-01-04
361					2016-01-04
11	17			459	2016-01-04
466	17.4			556	2016-01-04
483	30.1			454	2016-01-04
632	23.1			534	2016-01-04
380	21.1				2016-01-04
8	25.6			529	2016-01-04
181	30.4			496	2016-01-04
24	18.3			639	2016-01-04
36	24.2			525	2016-01-04
37	11.3			570	2016-01-04
134	38.9			604	2016-01-04
209	31.2			552	2016-01-04
281	8.2			486	2016-01-04
269	16.5			460	2016-01-04
306	12.2			472	2016-01-04
54	23.3			458	2016-01-04
537	21.4			437	2016-01-04
113	14.8			366	2016-01-04
403	10.9			530	2016-01-04
188					2016-01-04
146	19.6			479	2016-01-04
384	21.8				2016-01-04
494	18.7			501	2016-01-04
183	23.1			573	2016-01-04
86	33.2			471	2016-01-04
543	23.3			542	2016-01-04
544	11.5			516	2016-01-04
547	23.8			479	2016-01-04
241	17.8			450	2016-01-04
410	22.3			554	2016-01-04
342	28.6			646	2016-01-04
173	35.3			503	2016-01-04
504	14.6			430	2016-01-04
179	14.4			445	2016-01-04
389	20.5			477	2016-01-04
2	28.6				2016-01-04
66	25.2			507	2016-01-04
119	22.2			428	2016-01-04
366	32			441	2016-01-04
369	19.1			464	2016-01-04
556					2016-01-04
291	20.8			510	2016-01-04
352	16.3			540	2016-01-04
292	14.6			449	2016-01-04
100	24.8			557	2016-01-04
490	18.9			562	2016-01-04
42	18.7			506	2016-01-04
406	24.2			503	2016-01-04
239	21			452	2016-01-04
103	18.6			456	2016-01-04
508					2016-01-04
195					2016-01-04
219					2016-01-04
267					2016-01-04
382					2016-01-04
477					2016-01-04
377					2016-01-04
216	21.2			432	2016-01-04
344	13.1			562	2016-01-04
74	19.9			552	2016-01-04
319					2016-01-04
90	32.8			559	2016-01-04
98	21.6			382	2016-01-04
236					2016-01-04
265	24			399	2016-01-04
193	17.1			428	2016-01-04
288					2016-01-04
233	19.1			509	2016-01-04
437					2016-01-04
385	20			579	2016-01-04
443	20.4			381	2016-01-04
299					2016-01-04
454	25.8			469	2016-01-04
553	21.6			478	2016-01-04
424					2016-01-04
643	31.4			408	2016-01-04
484	24.6			416	2016-01-04
89	22.3			505	2016-01-04
150					2016-01-04
645	23.5			419	2016-01-04
38	17.9			492	2016-01-04
457					2016-01-04
248					2016-01-04
170	26.4			543	2016-01-04
640	26.6			497	2016-01-04
60	30			495	2016-01-04
106					2016-01-04
379	24.7			548	2016-01-04
12					2016-01-04
451					2016-01-04
517	17			408	2016-01-04
636	30			449	2016-01-04
634	24.2			516	2016-01-04
631	14			442	2016-01-04
629	23.1			477	2016-01-04
627					2016-01-04
624	27.7			484	2016-01-04
622	23.8			548	2016-01-04
618	27			507	2016-01-04
579					2016-01-04
140					2016-01-04
523					2016-01-04
211					2016-01-04
375					2016-01-04
234					2016-01-04
359					2016-01-04
121					2016-01-04
392					2016-01-04
278					2016-01-04
346					2016-01-04
135	25.7			503	2016-01-04
132	7				2016-01-04
212	15.2			500	2016-01-04
535					2016-01-04
257					2016-01-04
453					2016-01-04
58					2016-01-04
323					2016-01-04
602					2016-01-04
485					2016-01-04
205					2016-01-04
114					2016-01-04
540					2016-01-04
411					2016-01-04
246					2016-01-04
528	13.8			469	2016-01-04
441					2016-01-04
63					2016-01-04
546					2016-01-04
287					2016-01-04
492					2016-01-04
45					2016-01-04
247					2016-01-04
336					2016-01-04
400					2016-01-04
435					2016-01-04
177	20.4				2016-01-04
616					2016-01-04
1	18.1			423	2016-01-04
393					2016-01-04
518					2016-01-04
251	11.9			501	2016-01-04
548	15.8				2016-01-04
447					2016-01-04
491	18.6			500	2016-01-04
158	17.6				2016-01-04
427	16.2				2016-01-04
418	18.3			468	2016-01-04
603	14.7				2016-01-04
604	8.4				2016-01-04
107					2016-01-04
396	13.6			487	2016-01-04
608					2016-01-04
92	11.4			473	2016-01-04
310					2016-01-04
356	15.4			427	2016-01-04
169					2016-01-04
470					2016-01-04
104					2016-01-04
426					2016-01-04
425					2016-01-04
480					2016-01-04
499					2016-01-04
433	10.8			450	2016-01-04
450	14			620	2016-01-04
6					2016-01-04
423					2016-01-04
335					2016-01-04
590					2016-01-04
407					2016-01-04
354					2016-01-04
118	20.8			511	2016-01-04
311	32.1			500	2016-01-04
421	21			573	2016-01-04
314	18.2			447	2016-01-04
245	17.8				2016-01-04
614	30			515	2016-01-04
95					2016-01-04
204	14.4			484	2016-01-04
78	26			519	2016-01-04
428	15.2			487	2016-01-04
414	12.7			352	2016-01-04
139	19.8			418	2016-01-04
178					2016-01-04
625	16.5			367	2016-01-04
598	18.9				2016-01-04
597	16			311	2016-01-04
208					2016-01-04
343					2016-01-04
64	14.9			341	2016-01-04
117	20.4			435	2016-01-04
180	18.7			425	2016-01-04
145	16.1			387	2016-01-04
633	14.5			491	2016-01-04
46	14.3			472	2016-01-04
277	15				2016-01-04
21					2016-01-04
264	18.5			374	2016-01-04
596	22.7			396	2016-01-04
175					2016-01-04
650	12.8			377	2016-01-04
142					2016-01-04
161	19.5			449	2016-01-04
194					2016-01-04
573					2016-01-04
599	13.6			377	2016-01-04
565	21.2			394	2016-01-04
82	20.9			421	2016-01-04
4	16.3			348	2016-01-04
476					2016-01-04
430					2016-01-04
498	16.1			432	2016-01-04
76	16.2			405	2016-01-04
84	15.9			423	2016-01-04
18					2016-01-04
532					2016-01-04
124					2016-01-04
32					2016-01-04
459					2016-01-04
355					2016-01-04
413	19.8			420	2016-01-04
545					2016-01-04
474					2016-01-04
404					2016-01-04
112	22.9			441	2016-01-04
91					2016-01-04
268	22.1			392	2016-01-04
232	13.8			553	2016-01-04
153	22.8			423	2016-01-04
109	12.4			355	2016-01-04
40					2016-01-04
61	16.7			412	2016-01-04
68	21.8			391	2016-01-04
286					2016-01-04
394					2016-01-04
52	16.1			514	2016-01-04
617	22.5			525	2016-01-04
460	26.2			490	2016-01-04
307	21.5			501	2016-01-04
99	15.5			453	2016-01-04
273	20.6			403	2016-01-04
295	14.5				2016-01-04
541					2016-01-04
22					2016-01-04
589	15.6			483	2016-01-04
159	13.2			354	2016-01-04
14					2016-01-04
519					2016-01-04
398					2016-01-04
258					2016-01-04
87					2016-01-04
214					2016-01-04
360					2016-01-04
405					2016-01-04
338					2016-01-04
235	15.3			359	2016-01-04
254	18.3			454	2016-01-04
432					2016-01-04
189					2016-01-04
164					2016-01-04
381					2016-01-04
101					2016-01-04
70					2016-01-04
431					2016-01-04
530					2016-01-04
324					2016-01-04
225					2016-01-04
27	25.2			484	2016-01-05
47	18.4			548	2016-01-05
125	26.1			556	2016-01-05
144					2016-01-05
253	13.4			531	2016-01-05
274	30.9			487	2016-01-05
192	21.1			532	2016-01-05
200	19.8			573	2016-01-05
361					2016-01-05
11	19.2			464	2016-01-05
466	18.2			576	2016-01-05
483	28.9			447	2016-01-05
632	22.7			541	2016-01-05
380	22			490	2016-01-05
8	25.4			535	2016-01-05
181	31.2			510	2016-01-05
24	19.3			639	2016-01-05
36	24			523	2016-01-05
37	11.8			595	2016-01-05
134	37.4			610	2016-01-05
209	30.1			552	2016-01-05
281	15.3			477	2016-01-05
269	16.8			538	2016-01-05
306	11.9			477	2016-01-05
54	23.2			458	2016-01-05
537	20.6			448	2016-01-05
113	16.7			364	2016-01-05
403	11.1			529	2016-01-05
188					2016-01-05
146	19.6			488	2016-01-05
384	22.2			502	2016-01-05
494	18.2			502	2016-01-05
183	21.4			573	2016-01-05
86	34.3			480	2016-01-05
543	24.5			527	2016-01-05
544	13.5			513	2016-01-05
547	24.4			474	2016-01-05
241	20.7			489	2016-01-05
410	19.9			500	2016-01-05
342	27.1			652	2016-01-05
173	35.9			506	2016-01-05
504	13.9			420	2016-01-05
179	14.1			466	2016-01-05
389	20.2			473	2016-01-05
2	27.6			476	2016-01-05
66	24.1			512	2016-01-05
119	22.1			433	2016-01-05
366	33			447	2016-01-05
369	19.5			460	2016-01-05
556					2016-01-05
291	21.8			503	2016-01-05
352	16.4			544	2016-01-05
292	14.7			458	2016-01-05
100	25.3			543	2016-01-05
490	17.9			577	2016-01-05
42	18			502	2016-01-05
406	23.4			500	2016-01-05
239	20.9			442	2016-01-05
103	18			457	2016-01-05
508					2016-01-05
195					2016-01-05
219					2016-01-05
267					2016-01-05
382					2016-01-05
477					2016-01-05
377					2016-01-05
216	19			431	2016-01-05
344	13.1			557	2016-01-05
74	20.4			551	2016-01-05
319					2016-01-05
90	31.9			584	2016-01-05
98	19.7			392	2016-01-05
236					2016-01-05
265	23.6			401	2016-01-05
193	17.2			425	2016-01-05
288					2016-01-05
233	18.4			485	2016-01-05
437					2016-01-05
385	19.1			586	2016-01-05
443	19			381	2016-01-05
299					2016-01-05
454	25.4			472	2016-01-05
553	22			473	2016-01-05
424					2016-01-05
643	30.6			406	2016-01-05
484	25.6			420	2016-01-05
89	23.9			504	2016-01-05
150					2016-01-05
645	23.2			436	2016-01-05
38	19.6			493	2016-01-05
457					2016-01-05
248					2016-01-05
170	26.9			546	2016-01-05
640	24.4			501	2016-01-05
60	30.4			491	2016-01-05
106					2016-01-05
379	25.2			548	2016-01-05
12					2016-01-05
451					2016-01-05
517	16			400	2016-01-05
636	30			450	2016-01-05
634	22.8			512	2016-01-05
631	13.6				2016-01-05
629	22			485	2016-01-05
627					2016-01-05
624	29.7			484	2016-01-05
622	24.3			566	2016-01-05
618	27.4			526	2016-01-05
579					2016-01-05
140					2016-01-05
523					2016-01-05
211					2016-01-05
375					2016-01-05
234					2016-01-05
359					2016-01-05
121					2016-01-05
392					2016-01-05
278					2016-01-05
346					2016-01-05
135	25.6			508	2016-01-05
132	16.7			483	2016-01-05
212	15.2				2016-01-05
535					2016-01-05
257					2016-01-05
453					2016-01-05
58					2016-01-05
323					2016-01-05
602					2016-01-05
485					2016-01-05
205					2016-01-05
114					2016-01-05
540					2016-01-05
411					2016-01-05
246					2016-01-05
528	14.3			476	2016-01-05
441					2016-01-05
63					2016-01-05
546					2016-01-05
287					2016-01-05
492					2016-01-05
45					2016-01-05
247					2016-01-05
336					2016-01-05
400					2016-01-05
435					2016-01-05
177	19.4			442	2016-01-05
616					2016-01-05
1	17.4				2016-01-05
393					2016-01-05
518					2016-01-05
251	12.1				2016-01-05
548	15.6			455	2016-01-05
447					2016-01-05
491	16.8				2016-01-05
158	17.7			531	2016-01-05
427	15.7			386	2016-01-05
418	17.4			462	2016-01-05
603	14.6			427	2016-01-05
604	12.9			402	2016-01-05
107					2016-01-05
396	9			458	2016-01-05
608					2016-01-05
92	10.6			479	2016-01-05
310					2016-01-05
356	15.4			419	2016-01-05
169					2016-01-05
470					2016-01-05
104					2016-01-05
426					2016-01-05
425					2016-01-05
480					2016-01-05
499					2016-01-05
433	11.8			446	2016-01-05
450	15.1			618	2016-01-05
6					2016-01-05
423					2016-01-05
335					2016-01-05
590					2016-01-05
407					2016-01-05
354					2016-01-05
118	23.5			518	2016-01-05
311	32			504	2016-01-05
421	20.6			568	2016-01-05
314	18.1			456	2016-01-05
245	16.8			664	2016-01-05
614	30.3			516	2016-01-05
95					2016-01-05
204	14			489	2016-01-05
78	23.4			498	2016-01-05
428	15.1			431	2016-01-05
414	12.7			351	2016-01-05
139	20.8			389	2016-01-05
178					2016-01-05
625	15.8			372	2016-01-05
598	19.3			362	2016-01-05
597	15.4			311	2016-01-05
208					2016-01-05
343					2016-01-05
64	15.3			340	2016-01-05
117	20.3			437	2016-01-05
180	17.5			429	2016-01-05
145	16.8			388	2016-01-05
633	14.1			493	2016-01-05
46	13.5			479	2016-01-05
277	15.2			407	2016-01-05
21					2016-01-05
264	18.8			376	2016-01-05
596	22.3			409	2016-01-05
175					2016-01-05
650	14.1				2016-01-05
142					2016-01-05
161	20			439	2016-01-05
194					2016-01-05
573					2016-01-05
599	13.1			384	2016-01-05
565	21			392	2016-01-05
82	21			422	2016-01-05
4	15.4			349	2016-01-05
476					2016-01-05
430					2016-01-05
498	15.2			431	2016-01-05
76	17.1			409	2016-01-05
84	14			420	2016-01-05
18					2016-01-05
532					2016-01-05
124					2016-01-05
32					2016-01-05
459					2016-01-05
355					2016-01-05
413	20.3			407	2016-01-05
545					2016-01-05
474					2016-01-05
404					2016-01-05
112	20.6			451	2016-01-05
91					2016-01-05
268	22.9			379	2016-01-05
232	11.3			479	2016-01-05
153	22.9			438	2016-01-05
109	12.7			371	2016-01-05
40					2016-01-05
61	19.9			404	2016-01-05
68	20.9			401	2016-01-05
286					2016-01-05
394					2016-01-05
52	15.9			497	2016-01-05
617	21.6			511	2016-01-05
460	26.1			501	2016-01-05
307	21.2			492	2016-01-05
99	15.4			445	2016-01-05
273	19.9			446	2016-01-05
295	14.7			411	2016-01-05
541					2016-01-05
22					2016-01-05
589	16.7			465	2016-01-05
159	15.1			378	2016-01-05
14					2016-01-05
519					2016-01-05
398					2016-01-05
258					2016-01-05
87					2016-01-05
214					2016-01-05
360					2016-01-05
405					2016-01-05
338					2016-01-05
235	15.2			360	2016-01-05
254	19.9			451	2016-01-05
432					2016-01-05
189					2016-01-05
164					2016-01-05
381					2016-01-05
101					2016-01-05
70					2016-01-05
431					2016-01-05
530					2016-01-05
324					2016-01-05
225					2016-01-05
27	27.3			494	2016-01-06
47	16			574	2016-01-06
125	25.4			547	2016-01-06
144					2016-01-06
253	12.9			517	2016-01-06
274	32.2			505	2016-01-06
192	22.4			547	2016-01-06
200	19.5			579	2016-01-06
361					2016-01-06
11	18.5			467	2016-01-06
466	17.9			572	2016-01-06
483	27.9			446	2016-01-06
632	23.5			532	2016-01-06
380	21.4			495	2016-01-06
8	24.9			543	2016-01-06
181	29.7			507	2016-01-06
24	17.8			647	2016-01-06
36	24			521	2016-01-06
37	11.9			578	2016-01-06
134	38.8			611	2016-01-06
209	32.4			559	2016-01-06
281	17.3			483	2016-01-06
269	16.7			486	2016-01-06
306	12.6			478	2016-01-06
54	25.5			461	2016-01-06
537	21.2			442	2016-01-06
113	17.4			365	2016-01-06
403	9.8			544	2016-01-06
188					2016-01-06
146	19.5			486	2016-01-06
384	22.6			531	2016-01-06
494	17.9			523	2016-01-06
183	23.1			574	2016-01-06
86	33.4			471	2016-01-06
543	22.9			513	2016-01-06
544	13.5			514	2016-01-06
547	23.8			470	2016-01-06
241	18.2			457	2016-01-06
410	19.7			506	2016-01-06
342	26			654	2016-01-06
173	37.1			506	2016-01-06
504	15.1			422	2016-01-06
179	14.6			447	2016-01-06
389	19.2			458	2016-01-06
2	28.5			477	2016-01-06
66	24.8			509	2016-01-06
119	22.1			429	2016-01-06
366	32.6			447	2016-01-06
369	19.2			458	2016-01-06
556					2016-01-06
291	21.1			512	2016-01-06
352	14.5			536	2016-01-06
292	14.9			437	2016-01-06
100	26.7			547	2016-01-06
490	19.5			562	2016-01-06
42	19.5			505	2016-01-06
406	23.5			496	2016-01-06
239	18.9			447	2016-01-06
103	19.1			449	2016-01-06
508					2016-01-06
195					2016-01-06
219					2016-01-06
267					2016-01-06
382					2016-01-06
477					2016-01-06
377					2016-01-06
216	21			432	2016-01-06
344	13.5			550	2016-01-06
74	19.9			560	2016-01-06
319					2016-01-06
90	31.3			572	2016-01-06
98	23.4			386	2016-01-06
236					2016-01-06
265	23.6			401	2016-01-06
193	17.1			430	2016-01-06
288					2016-01-06
233	19.1			486	2016-01-06
437					2016-01-06
385	19.7			587	2016-01-06
443	21.7			381	2016-01-06
299					2016-01-06
454	27.3			479	2016-01-06
553	21.7			470	2016-01-06
424					2016-01-06
643	30.9			407	2016-01-06
484	25.5			417	2016-01-06
89	24.2			501	2016-01-06
150					2016-01-06
645	24.5			423	2016-01-06
38	21.3			482	2016-01-06
457					2016-01-06
248					2016-01-06
170	25.4			546	2016-01-06
640	24			509	2016-01-06
60	30.5			488	2016-01-06
106					2016-01-06
379	26			548	2016-01-06
12					2016-01-06
451					2016-01-06
517	16			410	2016-01-06
636	28.5			457	2016-01-06
634	23.1			517	2016-01-06
631	15.5			442	2016-01-06
629	22			475	2016-01-06
627					2016-01-06
624	29.6			488	2016-01-06
622	24.3			558	2016-01-06
618	26.8			514	2016-01-06
579					2016-01-06
140					2016-01-06
523					2016-01-06
211					2016-01-06
375					2016-01-06
234					2016-01-06
359					2016-01-06
121					2016-01-06
392					2016-01-06
278					2016-01-06
346					2016-01-06
135	26.4			507	2016-01-06
132	16.4			464	2016-01-06
212	15.1			486	2016-01-06
535					2016-01-06
257					2016-01-06
453					2016-01-06
58					2016-01-06
323					2016-01-06
602					2016-01-06
485					2016-01-06
205					2016-01-06
114					2016-01-06
540					2016-01-06
411					2016-01-06
246					2016-01-06
528	13.5			487	2016-01-06
441					2016-01-06
63					2016-01-06
546					2016-01-06
287					2016-01-06
492					2016-01-06
45					2016-01-06
247					2016-01-06
336					2016-01-06
400					2016-01-06
435					2016-01-06
177	17.3				2016-01-06
616					2016-01-06
1	17.8			428	2016-01-06
393					2016-01-06
518					2016-01-06
251	12			498	2016-01-06
548	16.1				2016-01-06
447					2016-01-06
491	17.4			492	2016-01-06
158	18.7			531	2016-01-06
427	15.5				2016-01-06
418	17.8			464	2016-01-06
603	14.1				2016-01-06
604	11.5				2016-01-06
107					2016-01-06
396	14.4			483	2016-01-06
608					2016-01-06
92	10.8			481	2016-01-06
310					2016-01-06
356	15.6			431	2016-01-06
169					2016-01-06
470					2016-01-06
104					2016-01-06
426					2016-01-06
425					2016-01-06
480					2016-01-06
499					2016-01-06
433	11.3			451	2016-01-06
450	15.5			621	2016-01-06
6					2016-01-06
423					2016-01-06
335					2016-01-06
590					2016-01-06
407					2016-01-06
354					2016-01-06
118	24.4			526	2016-01-06
311	31.4			498	2016-01-06
421	19.5			580	2016-01-06
314	17.4			448	2016-01-06
245	18.1			650	2016-01-06
614	30.9			520	2016-01-06
95					2016-01-06
204	15.5			493	2016-01-06
78	22.3			520	2016-01-06
428	15.6			436	2016-01-06
414	13.7			359	2016-01-06
139	20.6			390	2016-01-06
178					2016-01-06
625	16.2			369	2016-01-06
598	19.8			448	2016-01-06
597	15.5			311	2016-01-06
208					2016-01-06
343					2016-01-06
64	15.5			349	2016-01-06
117	21.2			459	2016-01-06
180	18.8			432	2016-01-06
145	16.5			394	2016-01-06
633	13.9			478	2016-01-06
46	13.9			481	2016-01-06
277	16.3				2016-01-06
21					2016-01-06
264	19.5			380	2016-01-06
596	22.8			403	2016-01-06
175					2016-01-06
650	14.9			381	2016-01-06
142					2016-01-06
161	18.7			438	2016-01-06
194					2016-01-06
573					2016-01-06
599	12.9			388	2016-01-06
565	21.7			389	2016-01-06
82	19.8			413	2016-01-06
4	15.1			347	2016-01-06
476					2016-01-06
430					2016-01-06
498	14.4			431	2016-01-06
76	17.2			408	2016-01-06
84	14.6			434	2016-01-06
18					2016-01-06
532					2016-01-06
124					2016-01-06
32					2016-01-06
459					2016-01-06
355					2016-01-06
413	19.6			412	2016-01-06
545					2016-01-06
474					2016-01-06
404					2016-01-06
112	22.4			446	2016-01-06
91					2016-01-06
268	20.3			382	2016-01-06
232	14.7			479	2016-01-06
153	21.6			427	2016-01-06
109	14.6			377	2016-01-06
40					2016-01-06
61	20.8			391	2016-01-06
68	22			410	2016-01-06
286					2016-01-06
394					2016-01-06
52	17.4			498	2016-01-06
617	21.3			545	2016-01-06
460	27.1			507	2016-01-06
307	20.5			496	2016-01-06
99	14.3			442	2016-01-06
273	18.7			442	2016-01-06
295	10.9			409	2016-01-06
541					2016-01-06
22					2016-01-06
589	15.7			462	2016-01-06
159	14.2			359	2016-01-06
14					2016-01-06
519					2016-01-06
398					2016-01-06
258					2016-01-06
87					2016-01-06
214					2016-01-06
360					2016-01-06
405					2016-01-06
338					2016-01-06
235	13			351	2016-01-06
254	21			451	2016-01-06
432					2016-01-06
189					2016-01-06
164					2016-01-06
381					2016-01-06
101					2016-01-06
70					2016-01-06
431					2016-01-06
530					2016-01-06
324					2016-01-06
225					2016-01-06
27	28.1			489	2016-01-07
47	17.2			553	2016-01-07
125	26.2			548	2016-01-07
144					2016-01-07
253	13.8			536	2016-01-07
274	32.4			491	2016-01-07
192	23.6			548	2016-01-07
200	19.5			585	2016-01-07
361					2016-01-07
11	18.3			454	2016-01-07
466	18.8			562	2016-01-07
483	27			447	2016-01-07
632	23.6			564	2016-01-07
380	20.7			486	2016-01-07
8	25.8			533	2016-01-07
181	31			500	2016-01-07
24	16.2			613	2016-01-07
36	24.3			507	2016-01-07
37	13.1			575	2016-01-07
134	40			608	2016-01-07
209	31.2			547	2016-01-07
281	18.8			494	2016-01-07
269	18			485	2016-01-07
306	13.4			480	2016-01-07
54	24.6			460	2016-01-07
537	20.6			437	2016-01-07
113	18			358	2016-01-07
403	10.1			530	2016-01-07
188					2016-01-07
146	19.8			472	2016-01-07
384	23			518	2016-01-07
494	18.4			503	2016-01-07
183	24			573	2016-01-07
86	33.3			472	2016-01-07
543	22.4			500	2016-01-07
544	12.3			518	2016-01-07
547	23.9			469	2016-01-07
241	14.3			453	2016-01-07
410	20			513	2016-01-07
342	28.1			651	2016-01-07
173	35.6			504	2016-01-07
504	15			429	2016-01-07
179	15			445	2016-01-07
389	19.3			462	2016-01-07
2	28.2			478	2016-01-07
66	24.5			503	2016-01-07
119	21.6			421	2016-01-07
366	32.9			445	2016-01-07
369	19.7			458	2016-01-07
556					2016-01-07
291	22.1			503	2016-01-07
352	16			541	2016-01-07
292	16.1			451	2016-01-07
100	25.4			528	2016-01-07
490	19.6			560	2016-01-07
42	18.4			505	2016-01-07
406	25.6			506	2016-01-07
239	18.7			445	2016-01-07
103	18.6			430	2016-01-07
508					2016-01-07
195					2016-01-07
219					2016-01-07
267					2016-01-07
382					2016-01-07
477					2016-01-07
377					2016-01-07
216	20.3			426	2016-01-07
344	13.6			566	2016-01-07
74	21.3			552	2016-01-07
319					2016-01-07
90	31.2			575	2016-01-07
98	23.1			394	2016-01-07
236					2016-01-07
265	24.4			406	2016-01-07
193	17.1			425	2016-01-07
288					2016-01-07
233	19.5			473	2016-01-07
437					2016-01-07
385	19.4			579	2016-01-07
443	19.6			370	2016-01-07
299					2016-01-07
454	25.9			476	2016-01-07
553	21.2			457	2016-01-07
424					2016-01-07
643	31.5			407	2016-01-07
484	24.1			408	2016-01-07
89	24.2			518	2016-01-07
150					2016-01-07
645	26.2			420	2016-01-07
38	22.3			511	2016-01-07
457					2016-01-07
248					2016-01-07
170	26.2			540	2016-01-07
640	24.1			494	2016-01-07
60	30.7			489	2016-01-07
106					2016-01-07
379	24.3			550	2016-01-07
12					2016-01-07
451					2016-01-07
517	15.2			407	2016-01-07
636	30			446	2016-01-07
634	22.6			522	2016-01-07
631	15.4			442	2016-01-07
629	21.6			474	2016-01-07
627					2016-01-07
624	26.1			489	2016-01-07
622	25.8			551	2016-01-07
618	27.7			513	2016-01-07
579					2016-01-07
140					2016-01-07
523					2016-01-07
211					2016-01-07
375					2016-01-07
234					2016-01-07
359					2016-01-07
121					2016-01-07
392					2016-01-07
278					2016-01-07
346					2016-01-07
135	26.3			505	2016-01-07
132	14.5			459	2016-01-07
212	13.1			505	2016-01-07
535					2016-01-07
257					2016-01-07
453					2016-01-07
58					2016-01-07
323					2016-01-07
602					2016-01-07
485					2016-01-07
205					2016-01-07
114					2016-01-07
540					2016-01-07
411					2016-01-07
246					2016-01-07
528	13.4			473	2016-01-07
441					2016-01-07
63					2016-01-07
546					2016-01-07
287					2016-01-07
492					2016-01-07
45					2016-01-07
247					2016-01-07
336					2016-01-07
400					2016-01-07
435					2016-01-07
177	16.9			440	2016-01-07
616					2016-01-07
1	19			436	2016-01-07
393					2016-01-07
518					2016-01-07
251	9.9			510	2016-01-07
548	16.3			450	2016-01-07
447					2016-01-07
491	17.6			499	2016-01-07
158	19.1			532	2016-01-07
427	16.4			387	2016-01-07
418	18.9			465	2016-01-07
603	15.2			425	2016-01-07
604	13			397	2016-01-07
107					2016-01-07
396	13.7			480	2016-01-07
608					2016-01-07
92	11.6			473	2016-01-07
310					2016-01-07
356	16.2			417	2016-01-07
169					2016-01-07
470					2016-01-07
104					2016-01-07
426					2016-01-07
425					2016-01-07
480					2016-01-07
499					2016-01-07
433	12.3			443	2016-01-07
450	16.5			610	2016-01-07
6					2016-01-07
423					2016-01-07
335					2016-01-07
590					2016-01-07
407					2016-01-07
354					2016-01-07
118	23.6			526	2016-01-07
311	32.7			495	2016-01-07
421	20			575	2016-01-07
314	17.4			455	2016-01-07
245	19.4			645	2016-01-07
614	30.9			494	2016-01-07
95					2016-01-07
204	15			490	2016-01-07
78	20.6			504	2016-01-07
428	16.1			425	2016-01-07
414	14.1			358	2016-01-07
139	20.5			384	2016-01-07
178					2016-01-07
625	15.6			371	2016-01-07
598	19.9			368	2016-01-07
597	15.6			282	2016-01-07
208					2016-01-07
343					2016-01-07
64	15.1			347	2016-01-07
117	20.7			477	2016-01-07
180	18.8			435	2016-01-07
145	16.5			379	2016-01-07
633	14.5			482	2016-01-07
46	14.3			464	2016-01-07
277	15.8			341	2016-01-07
21					2016-01-07
264	18.5			370	2016-01-07
596	22.5			405	2016-01-07
175					2016-01-07
650	15.9			384	2016-01-07
142					2016-01-07
161	19.9			438	2016-01-07
194					2016-01-07
573					2016-01-07
599	13.4			381	2016-01-07
565	21.9			441	2016-01-07
82	20.6			416	2016-01-07
4	14.8			338	2016-01-07
476					2016-01-07
430					2016-01-07
498	15.4			426	2016-01-07
76	16.6			416	2016-01-07
84	15			428	2016-01-07
18					2016-01-07
532					2016-01-07
124					2016-01-07
32					2016-01-07
459					2016-01-07
355					2016-01-07
413	18.9			418	2016-01-07
545					2016-01-07
474					2016-01-07
404					2016-01-07
112	22.7			460	2016-01-07
91					2016-01-07
268	18.9			385	2016-01-07
232	16.5			467	2016-01-07
153	22.1			424	2016-01-07
109	15.5			383	2016-01-07
40					2016-01-07
61	19.2			396	2016-01-07
68	19.1			394	2016-01-07
286					2016-01-07
394					2016-01-07
52	16.4			502	2016-01-07
617	21.6			523	2016-01-07
460	23.3			499	2016-01-07
307	21.5			639	2016-01-07
99	15.8			427	2016-01-07
273	18.4			447	2016-01-07
295	14.7			516	2016-01-07
541					2016-01-07
22					2016-01-07
589	14.9			487	2016-01-07
159	13.9			356	2016-01-07
14					2016-01-07
519					2016-01-07
398					2016-01-07
258					2016-01-07
87					2016-01-07
214					2016-01-07
360					2016-01-07
405					2016-01-07
338					2016-01-07
235	16			450	2016-01-07
254	20.4			451	2016-01-07
432					2016-01-07
189					2016-01-07
164					2016-01-07
381					2016-01-07
101					2016-01-07
70					2016-01-07
431					2016-01-07
530					2016-01-07
324					2016-01-07
225					2016-01-07
27	27			471	2016-01-08
47	18.1			576	2016-01-08
125	26.1			556	2016-01-08
144					2016-01-08
253	13.7			521	2016-01-08
274	32.1			489	2016-01-08
192	21.3			544	2016-01-08
200	19.6			573	2016-01-08
361					2016-01-08
11	18.7			517	2016-01-08
466	18.2			564	2016-01-08
483	27.6			449	2016-01-08
632	23.4			521	2016-01-08
380	22.4			495	2016-01-08
8	24.8			535	2016-01-08
181	29.2			497	2016-01-08
24	16.6			637	2016-01-08
36	24.1			514	2016-01-08
37	12.8			561	2016-01-08
134	39.4			603	2016-01-08
209	31.6			549	2016-01-08
281	19.7			484	2016-01-08
269	16.5			496	2016-01-08
306	13.3			480	2016-01-08
54	23.7			453	2016-01-08
537	21.6			440	2016-01-08
113	18.5			359	2016-01-08
403	10.8			536	2016-01-08
188					2016-01-08
146	19.4			480	2016-01-08
384	24			498	2016-01-08
494	18.6			520	2016-01-08
183	24.4			577	2016-01-08
86	32.8			472	2016-01-08
543	22.9			521	2016-01-08
544	14.5			524	2016-01-08
547	24.4			472	2016-01-08
241	21.4			494	2016-01-08
410	18.9			505	2016-01-08
342	28.2			648	2016-01-08
173	35.3			510	2016-01-08
504	14.7			432	2016-01-08
179	13.8			446	2016-01-08
389	19.7			466	2016-01-08
2	25.8			477	2016-01-08
66	24.6			511	2016-01-08
119	22.9			425	2016-01-08
366	33.2			454	2016-01-08
369	19.7			462	2016-01-08
556					2016-01-08
291	22.4			518	2016-01-08
352	16.7			541	2016-01-08
292	15.2			445	2016-01-08
100	26.7			527	2016-01-08
490	20.8			546	2016-01-08
42	18.6			505	2016-01-08
406	25.2			502	2016-01-08
239	19.9			468	2016-01-08
103	19			452	2016-01-08
508					2016-01-08
195					2016-01-08
219					2016-01-08
267					2016-01-08
382					2016-01-08
477					2016-01-08
377					2016-01-08
216	20.1			428	2016-01-08
344	13.7			569	2016-01-08
74	20.1			555	2016-01-08
319					2016-01-08
[truncated: 6,578 more rows]

## Sheet: February 2016
Animal Number	Day Production	Fat indication	Protein indication	Weight	Date
27	24.8	5.35	4.03	472	2016-02-01
47	9	5.62	4.08	549	2016-02-01
125	25	6.77	4.32	548	2016-02-01
144	27.5	4.62	3.56	495	2016-02-01
253	12.5	6.56	4.07	554	2016-02-01
274	27.7	3.77	3.58	493	2016-02-01
192	16.7	7.04	4.47	577	2016-02-01
200	16.8	6.54	4.32	592	2016-02-01
361	16.9	6.82	5.27	517	2016-02-01
11	15.5	6.36	4.49	487	2016-02-01
466	18.6	6.36	4.3	571	2016-02-01
483	25	4.88	3.97	456	2016-02-01
632	22.9	6.21	4.19	531	2016-02-01
380	20.6	6.16	4.33	530	2016-02-01
8	23.4	5	4	546	2016-02-01
181	26.7	7.22	4.09	497	2016-02-01
24					2016-02-01
36	22.4	5.79	4.03	522	2016-02-01
37	11.5	6.6	4.46	602	2016-02-01
134	34.6	5.29	4.11	593	2016-02-01
209	28	6.17	3.84	557	2016-02-01
281	28	4.22	3.69	522	2016-02-01
269	14.5	5.9	4.31	479	2016-02-01
306	13.3	5.65	4.38	484	2016-02-01
54	21.3	5.91	4.29	454	2016-02-01
537	20.1	5.55	3.96	447	2016-02-01
113	20.8	4.8	3.64	361	2016-02-01
403					2016-02-01
188	20.4	4.79	4.51	510	2016-02-01
146	18.2	5.19	4.06	497	2016-02-01
384	20.2	7	4.48	537	2016-02-01
494	17.1	5.87	4.48	511	2016-02-01
183	20.8	6.17	3.76	609	2016-02-01
86	29.3	5.87	3.99	480	2016-02-01
543	23.2	6	4.14	543	2016-02-01
544	15.4	7.04	4.49	539	2016-02-01
547	21.3	6.27	4.01	464	2016-02-01
241	15.1	6.1	4.22	463	2016-02-01
410	19	6.25	3.86	521	2016-02-01
342	25.2	4.64	3.43	656	2016-02-01
173	30.5	4.46	3.75	509	2016-02-01
504	15.3	5.85	4.59	438	2016-02-01
179	11.9	5.46	4.17	460	2016-02-01
389	17.1	6.58	4.28	479	2016-02-01
2	28.2	4.38	3.73	473	2016-02-01
66	22.8	5	3.66	507	2016-02-01
119	22.4	5.49	4.09	437	2016-02-01
366	31	4.45	4.05	464	2016-02-01
369	19.8	5.22	4.22	468	2016-02-01
556					2016-02-01
291	21.4	5.79	4.25	516	2016-02-01
352					2016-02-01
292	17.1	6.09	4.28	465	2016-02-01
100	20.1	4.65	3.72	561	2016-02-01
490	17.2	6.63	4.34	592	2016-02-01
42	15.5	6.01	4.54	492	2016-02-01
406	22.8	5.41	3.91	527	2016-02-01
239	21.1	4.58	3.84	461	2016-02-01
103	16.6	6.19	4.4	457	2016-02-01
508					2016-02-01
195					2016-02-01
219					2016-02-01
267					2016-02-01
382					2016-02-01
477					2016-02-01
377					2016-02-01
216	18.5	5.82	4.32	433	2016-02-01
344	13.5	6.23	4.16	569	2016-02-01
74	15.4	6.16	4.15	535	2016-02-01
319					2016-02-01
90	28.8	4.58	3.71	550	2016-02-01
98	20.5	4.6	3.71	403	2016-02-01
236					2016-02-01
265	21.8	5.29	4.02	410	2016-02-01
193	15	5.08	4.03	431	2016-02-01
288					2016-02-01
233	17.5	5.84	4.12	497	2016-02-01
437					2016-02-01
385	17.7	6.77	4.57	588	2016-02-01
443	21.3	6.05	4.27	392	2016-02-01
299					2016-02-01
454	21.3	5.82	3.73	470	2016-02-01
553	20.2	5.31	3.81	474	2016-02-01
424					2016-02-01
643	27.6	4.7	3.52	413	2016-02-01
484	22.1	5.34	3.74	435	2016-02-01
89	25.2	3.83	3.67	496	2016-02-01
150					2016-02-01
645	25.1	5.2	3.6	442	2016-02-01
38	20	4.86	4.03	513	2016-02-01
457					2016-02-01
248					2016-02-01
170	25.8	5.73	4.24	550	2016-02-01
640	25	5.52	3.91	514	2016-02-01
60	23.4	5.91	3.48	496	2016-02-01
106	21.6	5.3	4.89	479	2016-02-01
379	20.5	5.53	3.88	568	2016-02-01
12	25.7	5.29	5.3	421	2016-02-01
451					2016-02-01
517	14.9	5.89	4.48	416	2016-02-01
636	27.6	4.67	3.91	450	2016-02-01
634	21.3	5.39	4.21	531	2016-02-01
631	13	5.58	4.36	486	2016-02-01
629	18.3	6.24	3.83	486	2016-02-01
627	26	5.08	5.38	495	2016-02-01
624	17.3	4.58	3.95	461	2016-02-01
622	21	5.54	4.25	561	2016-02-01
618	25	6.47	4.08	513	2016-02-01
579					2016-02-01
140					2016-02-01
523					2016-02-01
211					2016-02-01
375					2016-02-01
234					2016-02-01
359					2016-02-01
121					2016-02-01
392					2016-02-01
278					2016-02-01
346					2016-02-01
135	26.9	6.11	4.34	525	2016-02-01
132	20.3	4.58	3.72	461	2016-02-01
212					2016-02-01
535					2016-02-01
257					2016-02-01
453					2016-02-01
58					2016-02-01
323					2016-02-01
602					2016-02-01
485					2016-02-01
205					2016-02-01
114					2016-02-01
540					2016-02-01
411					2016-02-01
246					2016-02-01
528	13.3	7.25	4.52	496	2016-02-01
441					2016-02-01
63					2016-02-01
546					2016-02-01
287					2016-02-01
492					2016-02-01
45					2016-02-01
247					2016-02-01
336					2016-02-01
400					2016-02-01
435					2016-02-01
177	17.8	5.18	3.85	483	2016-02-01
616					2016-02-01
1	17.3	5.87	3.98	440	2016-02-01
393					2016-02-01
518					2016-02-01
251	10.7	5.65	3.96	514	2016-02-01
548	12.4	6.39	4.28	465	2016-02-01
447	19.8	6.77	4.88	566	2016-02-01
491	15.9	5.28	4.16	506	2016-02-01
158					2016-02-01
427	15.6	6.49	4.41	396	2016-02-01
418	16.2	5.9	4.34	498	2016-02-01
603	14.2	5.9	4.3	435	2016-02-01
604	13.3	5.05	4.4	498	2016-02-01
107					2016-02-01
396	14.8	6.38	4.14	520	2016-02-01
608					2016-02-01
92					2016-02-01
310					2016-02-01
356	13.9	5.5	4.04	445	2016-02-01
169					2016-02-01
470					2016-02-01
104					2016-02-01
426					2016-02-01
425					2016-02-01
480					2016-02-01
499					2016-02-01
433	12.3	7.32	4.89	479	2016-02-01
450	13.6	5.44	3.96	616	2016-02-01
6					2016-02-01
423					2016-02-01
335					2016-02-01
590					2016-02-01
407					2016-02-01
354					2016-02-01
118	22.9	5.7	3.7	552	2016-02-01
311	31.8	5.1	4.12	515	2016-02-01
421	19.6	5.74	3.98	591	2016-02-01
314	15.2	4.09	3.67	445	2016-02-01
245	17.8	5.7	3.99	693	2016-02-01
614	27.1	5.35	3.51	530	2016-02-01
95					2016-02-01
204	11.9	5.79	4.03	501	2016-02-01
78	21.6	4.13	3.7	527	2016-02-01
428	14.6	5.84	4.09	434	2016-02-01
414	14.3	4.93	4.03	411	2016-02-01
139	17.1	6.28	4.38	405	2016-02-01
178					2016-02-01
625	15.8	5.8	4.03	388	2016-02-01
598	17.7	4.34	3.77	371	2016-02-01
597	15.4	5.73	4.03	324	2016-02-01
208					2016-02-01
343					2016-02-01
64	15.8	5.62	4.16	354	2016-02-01
117	16.8	5.12	3.88	459	2016-02-01
180	18.8	5.65	4.03	446	2016-02-01
145	16.7	4.93	4.24	405	2016-02-01
633	13.7	4.36	3.99	495	2016-02-01
46	13.6	5.73	4.06	479	2016-02-01
277	16.3	5.19	4.31	446	2016-02-01
21					2016-02-01
264	16.8	5.66	4.21	388	2016-02-01
596	19.4	4.53	3.65	419	2016-02-01
175					2016-02-01
650	15.8	5.27	4.07	396	2016-02-01
142					2016-02-01
161	17.3	5.14	4.06	455	2016-02-01
194					2016-02-01
573					2016-02-01
599	12.2	5.32	4.18	390	2016-02-01
565	19.4	4.74	3.53	409	2016-02-01
82	18	5.76	4.2	428	2016-02-01
4	13.5	5.74	4	364	2016-02-01
476					2016-02-01
430					2016-02-01
498	13.9	6.55	4.41	454	2016-02-01
76	15.1	5.99	4.39	405	2016-02-01
84	13.9	6.08	4.16	440	2016-02-01
18					2016-02-01
532					2016-02-01
124					2016-02-01
32					2016-02-01
459					2016-02-01
355					2016-02-01
413	14	6.03	4.05	408	2016-02-01
545					2016-02-01
474					2016-02-01
404					2016-02-01
112	19.9	4.6	3.43	458	2016-02-01
91					2016-02-01
268	19.3	5.06	3.79	404	2016-02-01
232	15.5	5.26	4.13	478	2016-02-01
153	18.9	4.63	3.85	445	2016-02-01
109	14.1	5.54	4.01	405	2016-02-01
40					2016-02-01
61	20.4	4.21	3.86	418	2016-02-01
68	22.3	4.55	3.57	393	2016-02-01
286					2016-02-01
394					2016-02-01
52	16.5	6.12	4.48	491	2016-02-01
617	18	4.68	3.76	556	2016-02-01
460	22.7	4.19	3.71	504	2016-02-01
307	19.2	4.47	3.71	524	2016-02-01
99	16	4.87	3.89	457	2016-02-01
273	18.3	4.38	3.74	456	2016-02-01
295	15.4	4.56	4.08	433	2016-02-01
541					2016-02-01
22					2016-02-01
589	14.7	5.95	4.27	457	2016-02-01
159	16.5	3.9	4.28	359	2016-02-01
14					2016-02-01
519					2016-02-01
398					2016-02-01
258					2016-02-01
87					2016-02-01
214					2016-02-01
360					2016-02-01
405					2016-02-01
338					2016-02-01
235	12.7	4.96	3.8	364	2016-02-01
254	22.5	3.59	3.7	448	2016-02-01
432					2016-02-01
201					2016-02-01
143					2016-02-01
189					2016-02-01
164					2016-02-01
381					2016-02-01
101					2016-02-01
70					2016-02-01
431					2016-02-01
530					2016-02-01
324					2016-02-01
225					2016-02-01
27	24.6	5.46	4	518	2016-02-02
47	10.3	5.89	4.15	550	2016-02-02
125	23.8	6.85	4.29	562	2016-02-02
144	27.7	4.55	3.53	489	2016-02-02
253	12.9	6.35	4.02	566	2016-02-02
274	26.8	3.63	3.64	490	2016-02-02
192	17	7.74	4.51	556	2016-02-02
200	16.7	6.33	4.32	586	2016-02-02
361	15.5	7.93	5.18	518	2016-02-02
11	15.8	6.14	4.51	479	2016-02-02
466	13.4	6.15	4.27	575	2016-02-02
483	24.6	4.74	3.97	445	2016-02-02
632	23	6.12	4.2	536	2016-02-02
380	18.9	6.14	4.32	501	2016-02-02
8	23.2	5.21	3.98	535	2016-02-02
181	25.6	7.3	4.1	501	2016-02-02
24					2016-02-02
36	22.6	5.86	4.04	519	2016-02-02
37	11.5	6.33	4.38	599	2016-02-02
134	35.4	5.05	4.12	602	2016-02-02
209	27.1	5.72	3.83	554	2016-02-02
281	27.4	4.22	3.75	519	2016-02-02
269	14.8	6.04	4.25	493	2016-02-02
306	12.8	5.85	4.34	480	2016-02-02
54	22.4	5.61	4.24	456	2016-02-02
537	19.7	5.62	3.97	448	2016-02-02
113	21.3	4.8	3.62	360	2016-02-02
403					2016-02-02
188	20.1	5.1	4.49	511	2016-02-02
146	16.7	5.29	4.06	488	2016-02-02
384	20.5	6.96	4.47	509	2016-02-02
494	17.1	6.08	4.43	535	2016-02-02
183	20.7	6.29	3.78	580	2016-02-02
86	30	5.6	3.92	471	2016-02-02
543	23	6	4.07	538	2016-02-02
544	13.6	6.98	4.49	543	2016-02-02
547	17.6	6.16	4.08	442	2016-02-02
241	15.3	6.49	4.23	468	2016-02-02
410	18.4	6.51	3.84	516	2016-02-02
342	26.1	4.31	3.41	660	2016-02-02
173	31.3	4.55	3.77	506	2016-02-02
504	15.4	5.89	4.58	439	2016-02-02
179	11.6	5.47	4.11	458	2016-02-02
389	18	6.77	4.27	472	2016-02-02
2	32.4	4.15	3.81	470	2016-02-02
66	21.8	5.13	3.65	498	2016-02-02
119	21	5.66	4.12	422	2016-02-02
366	31.2	4.64	4.04	450	2016-02-02
369	18.3	5.13	4.24	460	2016-02-02
556					2016-02-02
291	19.9	5.95	4.24	513	2016-02-02
352					2016-02-02
292	16.4	6.16	4.28	463	2016-02-02
100	20.3	4.63	3.72	566	2016-02-02
490	17.1	6.53	4.32	590	2016-02-02
42	15.6	6.29	4.53	505	2016-02-02
406	22	5.45	3.92	520	2016-02-02
239	20.3	4.84	3.92	455	2016-02-02
103	17.3	6.3	4.36	466	2016-02-02
508					2016-02-02
195					2016-02-02
219					2016-02-02
267					2016-02-02
382					2016-02-02
477					2016-02-02
377					2016-02-02
216	17.7	5.99	4.3	429	2016-02-02
344	12.9	6.33	4.12	575	2016-02-02
74	15.4	6.14	4.11	538	2016-02-02
319					2016-02-02
90	29.2	4.67	3.64	545	2016-02-02
98	21.6	4.78	3.68	415	2016-02-02
236					2016-02-02
265	20.6	5.45	3.96	409	2016-02-02
193	16.1	4.85	4.01	436	2016-02-02
288					2016-02-02
233	17.5	6.21	4.17	490	2016-02-02
437					2016-02-02
385	17.6	6.94	4.59	595	2016-02-02
443	21	6.03	4.28	388	2016-02-02
299					2016-02-02
454	21.2	5.58	3.68	463	2016-02-02
553	14.8	4.91	3.82	471	2016-02-02
424					2016-02-02
643	26.5	4.88	3.5	406	2016-02-02
484	23.3	5.06	3.72	429	2016-02-02
89	24.9	3.64	3.68	487	2016-02-02
150					2016-02-02
645	25.3	5.31	3.57	422	2016-02-02
38	20.3	4.89	4.06	529	2016-02-02
457					2016-02-02
248					2016-02-02
170	24.4	5.83	4.26	550	2016-02-02
640	24.8	5.74	3.86	502	2016-02-02
60	25.4	5.55	3.34	493	2016-02-02
106	22.3	5.79	4.83	428	2016-02-02
379	21.1	5.52	3.88	564	2016-02-02
12	12.7	5.53	5.19	422	2016-02-02
451					2016-02-02
517	15.2	5.99	4.47	418	2016-02-02
636	25.5	4.63	3.93	452	2016-02-02
634	20.5	5.76	4.21	522	2016-02-02
631	12	5.66	4.31	429	2016-02-02
629	15.5	6.69	3.7	480	2016-02-02
627	18.4	5.77	5.12	502	2016-02-02
624	16.9	4.58	3.96	465	2016-02-02
622	18	6.25	4.25	574	2016-02-02
618	24.8	6.46	4.03	518	2016-02-02
579					2016-02-02
140					2016-02-02
523					2016-02-02
211					2016-02-02
375					2016-02-02
234					2016-02-02
359					2016-02-02
121					2016-02-02
392					2016-02-02
278					2016-02-02
346					2016-02-02
135	27.2	6.04	4.3	519	2016-02-02
132	20.6	4.72	3.71	463	2016-02-02
212					2016-02-02
535					2016-02-02
257					2016-02-02
453					2016-02-02
58					2016-02-02
323					2016-02-02
602					2016-02-02
485					2016-02-02
205					2016-02-02
114					2016-02-02
540					2016-02-02
411					2016-02-02
246					2016-02-02
528	12.8	7.13	4.51	489	2016-02-02
441					2016-02-02
63					2016-02-02
546					2016-02-02
287					2016-02-02
492					2016-02-02
45					2016-02-02
247					2016-02-02
336					2016-02-02
400					2016-02-02
435					2016-02-02
177	17.9	5.09	3.81	483	2016-02-02
616					2016-02-02
1	17.9	6.08	3.98	443	2016-02-02
393					2016-02-02
518					2016-02-02
251	11	5.61	3.96	518	2016-02-02
548	12.9	6.48	4.28	477	2016-02-02
447	20.2	6.29	4.75	558	2016-02-02
491	16	5.29	4.15	493	2016-02-02
158					2016-02-02
427	16.3	6.49	4.35	401	2016-02-02
418	16	5.62	4.33	493	2016-02-02
603	13.8	5.77	4.25	433	2016-02-02
604	12.5	5.03	4.39	413	2016-02-02
107					2016-02-02
396	13.3	6.58	4.14	515	2016-02-02
608					2016-02-02
92					2016-02-02
310					2016-02-02
356	14.2	5.57	4.04	447	2016-02-02
169					2016-02-02
470					2016-02-02
104					2016-02-02
426					2016-02-02
425					2016-02-02
480					2016-02-02
499					2016-02-02
433	10.4	7.73	4.92	470	2016-02-02
450	14	5.67	3.93	616	2016-02-02
6					2016-02-02
423					2016-02-02
335					2016-02-02
590					2016-02-02
407					2016-02-02
354					2016-02-02
118	23.6	5.4	3.71	546	2016-02-02
311	33.4	4.92	4.11	516	2016-02-02
421	19.8	5.96	3.96	589	2016-02-02
314	12.7	3.96	3.68	432	2016-02-02
245	17.4	5.73	3.95	713	2016-02-02
614	27.8	5.32	3.51	504	2016-02-02
95					2016-02-02
204	12.4	5.83	4.01	501	2016-02-02
78	21.4	4.16	3.68	533	2016-02-02
428	14.1	6.16	4.08	436	2016-02-02
414	13.8	5.07	4.05	355	2016-02-02
139	16.9	6.34	4.35	391	2016-02-02
178					2016-02-02
625	15.5	5.94	4.01	381	2016-02-02
598	17.1	4.36	3.78	372	2016-02-02
597	15.4	5.95	3.99	318	2016-02-02
208					2016-02-02
343					2016-02-02
64	14.8	5.85	4.16	355	2016-02-02
117	17.1	4.92	3.88	449	2016-02-02
180	18.6	5.47	4.03	429	2016-02-02
145	15.9	4.87	4.26	383	2016-02-02
633	14.3	4.42	4	488	2016-02-02
46	13.8	5.69	4.07	473	2016-02-02
277	14.6	5.39	4.34	364	2016-02-02
21					2016-02-02
264	16.2	5.81	4.23	375	2016-02-02
596	17.8	5.01	3.57	417	2016-02-02
175					2016-02-02
650	14.2	5.71	4.05	396	2016-02-02
142					2016-02-02
161	16.8	5.24	4.06	447	2016-02-02
194					2016-02-02
573					2016-02-02
599	13.1	4.89	4.09	385	2016-02-02
565	19.1	4.86	3.63	401	2016-02-02
82	17.7	6.11	4.17	430	2016-02-02
4	13.2	5.95	3.98	351	2016-02-02
476					2016-02-02
430					2016-02-02
498	13.3	6.8	4.46	441	2016-02-02
76	14.2	5.99	4.32	424	2016-02-02
84	13.6	6.06	4.17	433	2016-02-02
18					2016-02-02
532					2016-02-02
124					2016-02-02
32					2016-02-02
459					2016-02-02
355					2016-02-02
413	13	5.88	4	410	2016-02-02
545					2016-02-02
474					2016-02-02
404					2016-02-02
112	19	4.56	3.46	457	2016-02-02
91					2016-02-02
268	19.3	4.85	3.77	404	2016-02-02
232	19.4	5.3	4.08	487	2016-02-02
153	19.3	4.91	3.84	435	2016-02-02
109	13.9	5.44	3.98	407	2016-02-02
40					2016-02-02
61	21.3	4.4	3.87	540	2016-02-02
68	22.2	4.46	3.58	393	2016-02-02
286					2016-02-02
394					2016-02-02
52	17.3	6.14	4.46	490	2016-02-02
617	18	4.56	3.74	553	2016-02-02
460	22	4.61	3.71	507	2016-02-02
307	18.1	4.56	3.71	533	2016-02-02
99	15.1	4.87	3.93	448	2016-02-02
273	19.1	4.79	3.71	448	2016-02-02
295	15.6	4.66	4.09	434	2016-02-02
541					2016-02-02
22					2016-02-02
589	14.5	5.97	4.14	484	2016-02-02
159	16	4.1	4.3	365	2016-02-02
14					2016-02-02
519					2016-02-02
398					2016-02-02
258					2016-02-02
87					2016-02-02
214					2016-02-02
360					2016-02-02
405					2016-02-02
338					2016-02-02
235	13.5	5.14	3.72	371	2016-02-02
254	19.8	3.75	3.66	442	2016-02-02
432					2016-02-02
201					2016-02-02
143					2016-02-02
189					2016-02-02
164					2016-02-02
381					2016-02-02
101					2016-02-02
70					2016-02-02
431					2016-02-02
530					2016-02-02
324					2016-02-02
225					2016-02-02
27	23.3	5.47	4	486	2016-02-03
47	11.2	6.57	4.27	560	2016-02-03
125	24.2	7.07	4.25	562	2016-02-03
144	29.5	4.19	3.49	489	2016-02-03
253	11.4	6.39	3.98	560	2016-02-03
274	26.3	3.83	3.54	488	2016-02-03
192	17.4	7.82	4.46	563	2016-02-03
200	16.6	6.56	4.35	599	2016-02-03
361	17.9	8.05	5.28	527	2016-02-03
11	18.6	6.3	4.49	481	2016-02-03
466	16.7	6.06	4.24	581	2016-02-03
483	24.6	5.21	3.97	442	2016-02-03
632	22.3	5.94	4.18	538	2016-02-03
380	19.7	6.42	4.35	503	2016-02-03
8	22.7	5.28	3.98	560	2016-02-03
181	25.6	7.42	4.02	494	2016-02-03
24					2016-02-03
36	22.7	5.73	4	525	2016-02-03
37	10.9	6.58	4.44	585	2016-02-03
134	34.5	4.91	4.08	615	2016-02-03
209	29.8	6.15	3.87	558	2016-02-03
281	26.6	4.25	3.79	519	2016-02-03
269	15.7	6.55	4.17	495	2016-02-03
306	12.9	5.79	4.37	483	2016-02-03
54	22.7	5.43	4.31	456	2016-02-03
537	19.8	5.39	4	450	2016-02-03
113	21.9	4.75	3.66	366	2016-02-03
403					2016-02-03
188	20.5	5.07	4.45	508	2016-02-03
146	17.5	5.24	4.07	503	2016-02-03
384	20.4	6.61	4.43	529	2016-02-03
494	17.2	6.01	4.43	523	2016-02-03
183	21.3	6.4	3.79	582	2016-02-03
86	30.8	5.82	3.88	473	2016-02-03
543	21.5	6.41	4.09	513	2016-02-03
544	14.1	6.75	4.47	541	2016-02-03
547	13.9	6.32	4.02	440	2016-02-03
241	15.3	6.45	4.21	462	2016-02-03
410	18.3	6.28	3.87	523	2016-02-03
342	26	4.49	3.46	648	2016-02-03
173	31.4	4.53	3.8	508	2016-02-03
504	14.7	6.04	4.59	432	2016-02-03
179	12.8	5.51	4.06	452	2016-02-03
389	18.1	6.72	4.28	480	2016-02-03
2	31.8	4.61	3.83	478	2016-02-03
66	22.8	4.58	3.62	512	2016-02-03
119	21.6	5.97	4.09	420	2016-02-03
366	30.8	4.55	4.07	453	2016-02-03
369	18.4	5.31	4.26	469	2016-02-03
556					2016-02-03
291	20.4	6.14	4.24	515	2016-02-03
352					2016-02-03
292	17.3	6.22	4.23	460	2016-02-03
100	22.2	4.75	3.68	543	2016-02-03
490	13.2	6.74	4.33	601	2016-02-03
42	16.5	6.27	4.54	509	2016-02-03
406	22.7	5.39	3.9	520	2016-02-03
239	20.4	4.62	3.92	463	2016-02-03
103	18.2	6.56	4.36	461	2016-02-03
508					2016-02-03
195					2016-02-03
219					2016-02-03
267					2016-02-03
382					2016-02-03
477					2016-02-03
377					2016-02-03
216	18.8	6	4.29	432	2016-02-03
344	13.3	6.41	4.14	568	2016-02-03
74	17.3	6.16	4.05	542	2016-02-03
319					2016-02-03
90	29.5	4.7	3.71	552	2016-02-03
98	20.9	5.17	3.7	373	2016-02-03
236					2016-02-03
265	20.9	5.11	3.99	439	2016-02-03
193	15.8	4.68	3.98	442	2016-02-03
288					2016-02-03
233	17.9	6.04	4.17	481	2016-02-03
437					2016-02-03
385	17.8	6.76	4.54	588	2016-02-03
443	20	5.56	4.3	376	2016-02-03
299					2016-02-03
454	20.6	5.49	3.73	448	2016-02-03
553	18.1	4.95	3.76	475	2016-02-03
424					2016-02-03
643	28.2	4.42	3.48	406	2016-02-03
484	24.1	5.09	3.72	426	2016-02-03
89	26.5	4.26	3.68	490	2016-02-03
150					2016-02-03
645	24.1	4.82	3.55	413	2016-02-03
38	18.5	5.49	4.04	515	2016-02-03
457					2016-02-03
248					2016-02-03
170	25.1	5.78	4.25	549	2016-02-03
640	22	4.58	4.07	536	2016-02-03
60	25	5.72	3.3	490	2016-02-03
106	21.8	5.45	4.77	431	2016-02-03
379	20.4	5.77	3.87	582	2016-02-03
12	16.6	5.97	5.04	423	2016-02-03
451					2016-02-03
517	15.1	6.18	4.46	420	2016-02-03
636	26.3	4.59	3.88	452	2016-02-03
634	20.2	5.81	4.2	529	2016-02-03
631	13.1	5.35	4.33	438	2016-02-03
629	17.3	6.11	3.48	491	2016-02-03
627	20.6	5.24	4.82	494	2016-02-03
624	20.8	5.62	3.75	484	2016-02-03
622	21.8	6.58	4.15	581	2016-02-03
618	24.5	6.36	4.04	524	2016-02-03
579					2016-02-03
140					2016-02-03
523					2016-02-03
211					2016-02-03
375					2016-02-03
234					2016-02-03
359					2016-02-03
121					2016-02-03
392					2016-02-03
278					2016-02-03
346					2016-02-03
135	26.2	5.75	4.33	517	2016-02-03
132	20.9	4.65	3.72	470	2016-02-03
212					2016-02-03
535					2016-02-03
257					2016-02-03
453					2016-02-03
58					2016-02-03
323					2016-02-03
602					2016-02-03
485					2016-02-03
205					2016-02-03
114					2016-02-03
540					2016-02-03
411					2016-02-03
246					2016-02-03
528	12.5	7.09	4.51	541	2016-02-03
441					2016-02-03
63					2016-02-03
546					2016-02-03
287					2016-02-03
492					2016-02-03
45					2016-02-03
247					2016-02-03
336					2016-02-03
400					2016-02-03
435					2016-02-03
177	18	5.18	3.84	463	2016-02-03
616					2016-02-03
1	17	5.97	4.06	445	2016-02-03
393					2016-02-03
518					2016-02-03
251	11.1	5.46	3.94	518	2016-02-03
548	14.7	6.35	4.22	472	2016-02-03
447	21.6	6.52	4.57	545	2016-02-03
491	16.4	5.1	3.95	492	2016-02-03
158					2016-02-03
427	16.2	6.49	4.31	398	2016-02-03
418	15.8	5.45	4.33	488	2016-02-03
603	14	5.81	4.23	441	2016-02-03
604	12	5.11	4.39	417	2016-02-03
107					2016-02-03
396	12.9	6.99	4.15	514	2016-02-03
608					2016-02-03
92					2016-02-03
310					2016-02-03
356	14.5	5.87	4.07	446	2016-02-03
169					2016-02-03
470					2016-02-03
104					2016-02-03
426					2016-02-03
425					2016-02-03
480					2016-02-03
499					2016-02-03
433	11.4	7.62	4.9	464	2016-02-03
450	13.5	5.66	3.91	613	2016-02-03
6					2016-02-03
423					2016-02-03
335					2016-02-03
590					2016-02-03
407					2016-02-03
354					2016-02-03
118	24.2	5.29	3.66	551	2016-02-03
311	33	5.46	4.15	511	2016-02-03
421	19.9	6.15	3.94	586	2016-02-03
314	10.6	3.89	3.58	462	2016-02-03
245	15.8	5.62	3.98	708	2016-02-03
614	30.2	5.34	3.48	516	2016-02-03
95					2016-02-03
204	12.6	6.02	3.93	499	2016-02-03
78	23	4.07	3.62	520	2016-02-03
428	14.8	6.51	4.04	434	2016-02-03
414	13.9	5.22	4.06	358	2016-02-03
139	16.8	6.32	4.3	394	2016-02-03
178					2016-02-03
625	15.8	5.83	4.02	378	2016-02-03
598	17.2	4.2	3.74	366	2016-02-03
597	16.9	6.01	4.01	324	2016-02-03
208					2016-02-03
343					2016-02-03
64	15.5	5.72	4.11	362	2016-02-03
117	18	5	3.83	446	2016-02-03
180	18.3	5.52	4.04	439	2016-02-03
145	15.6	4.81	4.23	392	2016-02-03
633	14.5	4.28	3.96	493	2016-02-03
46	11.3	5.73	4.1	479	2016-02-03
277	15.3	5.37	4.36	358	2016-02-03
21					2016-02-03
264	15.5	5.72	4.19	382	2016-02-03
596	19.1	5.22	3.54	408	2016-02-03
175					2016-02-03
650	14.6	5.87	4.03	404	2016-02-03
142					2016-02-03
161	17.4	5.32	4.03	448	2016-02-03
194					2016-02-03
573					2016-02-03
599	13.1	5	4.07	384	2016-02-03
565	19.6	4.78	3.72	407	2016-02-03
82	18	6.27	4.16	425	2016-02-03
4	13.5	6.23	3.94	422	2016-02-03
476					2016-02-03
430					2016-02-03
498	13.6	6.68	4.47	439	2016-02-03
76	18.2	6.18	4.24	434	2016-02-03
84	14.2	6.24	4.12	437	2016-02-03
18					2016-02-03
532					2016-02-03
124					2016-02-03
32					2016-02-03
459					2016-02-03
355					2016-02-03
413	12.6	5.73	3.91	404	2016-02-03
545					2016-02-03
474					2016-02-03
404					2016-02-03
112	18.2	4.36	3.51	464	2016-02-03
91					2016-02-03
268	18.7	4.93	3.85	422	2016-02-03
232	19.3	5.65	3.99	479	2016-02-03
153	18.8	5.07	3.85	438	2016-02-03
109	17	5.27	3.92	403	2016-02-03
40					2016-02-03
61	15.6	4.72	3.91	414	2016-02-03
68	21.2	4.6	3.57	389	2016-02-03
286					2016-02-03
394					2016-02-03
52	16.4	5.96	4.49	486	2016-02-03
617	17.4	4.59	3.73	542	2016-02-03
460	21.9	4.29	3.71	519	2016-02-03
307	14.7	4.2	3.73	505	2016-02-03
99	15.2	4.7	3.94	454	2016-02-03
273	18	4.81	3.7	448	2016-02-03
295	15.2	4.61	4.1	436	2016-02-03
541					2016-02-03
22					2016-02-03
589	16.4	6.12	4.02	522	2016-02-03
159	16	3.86	4.31	363	2016-02-03
14					2016-02-03
519					2016-02-03
398					2016-02-03
258					2016-02-03
87					2016-02-03
214					2016-02-03
360					2016-02-03
405					2016-02-03
338					2016-02-03
235	15.7	5.68	3.64	363	2016-02-03
254	19.7	3.99	3.63	450	2016-02-03
432					2016-02-03
201					2016-02-03
143					2016-02-03
189					2016-02-03
164					2016-02-03
381					2016-02-03
101					2016-02-03
70					2016-02-03
431					2016-02-03
530					2016-02-03
324					2016-02-03
225					2016-02-03
27	22.5	5.66	4.03	482	2016-02-04
47	11.9	6.38	4.32	559	2016-02-04
125	23.9	6.87	4.24	568	2016-02-04
144	30.3	4.43	3.45	497	2016-02-04
253	11	6.66	3.94	557	2016-02-04
274	26.9	3.87	3.49	499	2016-02-04
192	15.7	7.44	4.49	572	2016-02-04
200	15.8	7.07	4.4	649	2016-02-04
361	19.5	7.41	5.14	507	2016-02-04
11	16.3	6.65	4.49	486	2016-02-04
466	16.9	6.18	4.24	588	2016-02-04
483	22.3	5.52	3.94	460	2016-02-04
632	21.6	6.18	4.18	526	2016-02-04
380	18.4	6.63	4.39	508	2016-02-04
8	21.1	5.33	4.05	556	2016-02-04
181	23.9	7.25	3.99	497	2016-02-04
24					2016-02-04
36	22	5.83	4.06	530	2016-02-04
37	10.7	6.43	4.42	604	2016-02-04
134	34	5.16	4.11	616	2016-02-04
209	27.5	5.67	3.88	532	2016-02-04
281	27.5	4.63	3.82	527	2016-02-04
269	15.7	6.26	4.16	491	2016-02-04
306	12.5	5.77	4.38	495	2016-02-04
54	21	5.33	4.33	461	2016-02-04
537	20.4	5.67	4.05	446	2016-02-04
113	20.6	4.92	3.68	370	2016-02-04
403					2016-02-04
188	20	5.06	4.44	510	2016-02-04
146	15.4	5.27	4.11	500	2016-02-04
384	19.7	7.2	4.54	508	2016-02-04
494	16.9	5.93	4.46	538	2016-02-04
183	21.2	6.35	3.83	591	2016-02-04
86	28.2	5.88	3.96	481	2016-02-04
543	22.6	6.4	4.1	529	2016-02-04
544	13.6	7.2	4.5	535	2016-02-04
547	12.4	7.42	3.84	441	2016-02-04
241	15	6.5	4.18	481	2016-02-04
410	17.3	6.11	3.93	531	2016-02-04
342	22.7	4.98	3.51	633	2016-02-04
173	28	4.7	3.8	510	2016-02-04
504	14.5	6.29	4.58	434	2016-02-04
179	11.9	5.39	4.07	463	2016-02-04
389	16.1	6.73	4.3	465	2016-02-04
2	29.9	4.3	3.84	485	2016-02-04
66	21.3	4.8	3.65	513	2016-02-04
119	21.7	6.07	4.1	422	2016-02-04
366	29.5	4.89	4.13	462	2016-02-04
369	16.9	5.62	4.25	461	2016-02-04
556					2016-02-04
291	19.6	6.25	4.26	518	2016-02-04
352					2016-02-04
292	16.2	6.57	4.27	464	2016-02-04
100	20.8	4.7	3.71	544	2016-02-04
490	12.8	7	4.4	579	2016-02-04
42	15.7	6.37	4.56	513	2016-02-04
406	22.6	5.56	3.89	519	2016-02-04
239	19.2	4.69	3.86	467	2016-02-04
103	17.2	6.65	4.39	452	2016-02-04
508					2016-02-04
195					2016-02-04
219					2016-02-04
267					2016-02-04
382					2016-02-04
477					2016-02-04
377					2016-02-04
216	17.7	6.07	4.35	448	2016-02-04
344	12.6	6.45	4.16	578	2016-02-04
74	16.2	6.15	4.13	553	2016-02-04
319					2016-02-04
90	28.4	4.85	3.77	576	2016-02-04
98	20.8	5.38	3.74	391	2016-02-04
236					2016-02-04
265	20.7	5.03	4.09	418	2016-02-04
193	15	4.8	4	437	2016-02-04
288					2016-02-04
233	17.1	5.99	4.2	493	2016-02-04
437					2016-02-04
385	17.1	6.39	4.53	596	2016-02-04
443	19.1	5.64	4.34	386	2016-02-04
299					2016-02-04
454	19.8	5.85	3.76	456	2016-02-04
553	19.6	5.05	3.76	485	2016-02-04
424					2016-02-04
643	27	4.69	3.41	413	2016-02-04
484	22	5.31	3.79	433	2016-02-04
89	26	4.27	3.72	503	2016-02-04
150	13.3	5.09	5.32		2016-02-04
645	23.5	5.69	3.53	420	2016-02-04
38	18.4	5.7	3.99	524	2016-02-04
457					2016-02-04
248	6.9	8.63	5.7		2016-02-04
170	24.4	5.87	4.33	557	2016-02-04
640	23.5	6.44	3.91	513	2016-02-04
60	24.1	5.76	3.45	502	2016-02-04
106	17.9	5.03	4.61	444	2016-02-04
379	19.4	6.02	3.89	571	2016-02-04
12	18.9	6.41	4.62	429	2016-02-04
451					2016-02-04
517	14.7	6.42	4.53	421	2016-02-04
636	26.2	4.86	3.87	455	2016-02-04
634	20.2	5.58	4.18	526	2016-02-04
631	14.1	6.6	4.38	445	2016-02-04
629	18.8	6.3	3.52	491	2016-02-04
627	21.8	4.79	4.53	505	2016-02-04
624	24.2	4.72	3.58	479	2016-02-04
622	18.2	5.61	4.18	583	2016-02-04
618	22.2	6.45	4.14	515	2016-02-04
579					2016-02-04
140					2016-02-04
523					2016-02-04
211					2016-02-04
375					2016-02-04
234					2016-02-04
359					2016-02-04
121					2016-02-04
392					2016-02-04
278					2016-02-04
346					2016-02-04
135	24	5.5	4.4	532	2016-02-04
132	21.1	4.94	3.72	461	2016-02-04
212					2016-02-04
535	1.5	6.44	5.58		2016-02-04
257					2016-02-04
453					2016-02-04
58					2016-02-04
323					2016-02-04
602					2016-02-04
485					2016-02-04
205					2016-02-04
114					2016-02-04
540					2016-02-04
411					2016-02-04
246					2016-02-04
528	13.2	7.12	4.53	486	2016-02-04
441					2016-02-04
63					2016-02-04
546					2016-02-04
287					2016-02-04
492					2016-02-04
45					2016-02-04
247					2016-02-04
336					2016-02-04
400					2016-02-04
435					2016-02-04
177	18	5.47	3.89	480	2016-02-04
616					2016-02-04
1	17.1	5.79	4.11	516	2016-02-04
393					2016-02-04
518					2016-02-04
251	10.5	5.6	3.95	512	2016-02-04
548	13.7	6.11	4.23	469	2016-02-04
447	21.9	7.41	4.49	562	2016-02-04
491	16.2	5.29	3.96	505	2016-02-04
158					2016-02-04
427	15.4	6.78	4.34	397	2016-02-04
418	13.4	5.89	4.34	529	2016-02-04
603	13.3	5.95	4.32	444	2016-02-04
604	12.4	5.2	4.39	425	2016-02-04
107					2016-02-04
396	13.1	6.75	4.13	516	2016-02-04
608					2016-02-04
92					2016-02-04
310					2016-02-04
356	13.6	6.15	4.14	439	2016-02-04
169					2016-02-04
470					2016-02-04
104					2016-02-04
426					2016-02-04
425					2016-02-04
480					2016-02-04
499					2016-02-04
433	11.5	7.92	4.9	471	2016-02-04
450	13.4	6.09	4	625	2016-02-04
6					2016-02-04
423					2016-02-04
335					2016-02-04
590					2016-02-04
407					2016-02-04
354					2016-02-04
118	22.3	5.47	3.67	557	2016-02-04
311	31.2	5.34	4.17	519	2016-02-04
421	18	6.25	3.96	584	2016-02-04
314	11.5	3.6	3.46	456	2016-02-04
245	15.5	5.64	3.99	690	2016-02-04
614	29.5	5.2	3.53	518	2016-02-04
95					2016-02-04
204	13	6.33	4	505	2016-02-04
78	23	4.04	3.68	542	2016-02-04
428	14.7	6.34	4.02	439	2016-02-04
414	14	5.34	4.08	359	2016-02-04
139	16.5	6.51	4.29	419	2016-02-04
178					2016-02-04
625	13.7	6.03	4.06	387	2016-02-04
598	17	4.32	3.81	373	2016-02-04
597	15.5	5.51	4.04	318	2016-02-04
208					2016-02-04
343					2016-02-04
64	15.5	5.86	4.13	362	2016-02-04
117	17.4	5.44	3.8	462	2016-02-04
180	17.8	5.82	4.07	447	2016-02-04
145	15.5	4.88	4.25	405	2016-02-04
633	14.5	4.49	4.01	496	2016-02-04
46	12.5	5.69	4.07	490	2016-02-04
277	15	5.39	4.36	365	2016-02-04
21					2016-02-04
264	16.5	5.64	4.22	391	2016-02-04
596	19.1	4.77	3.63	413	2016-02-04
175					2016-02-04
650	14	5.6	4.04	396	2016-02-04
142					2016-02-04
161	17.5	5.44	4	468	2016-02-04
194					2016-02-04
573					2016-02-04
599	13.4	5.01	4.12	389	2016-02-04
565	19.5	4.75	3.77	479	2016-02-04
82	17.4	6.34	4.18	431	2016-02-04
4	13.4	6.06	3.95	359	2016-02-04
476					2016-02-04
430					2016-02-04
498	13.1	6.66	4.48	448	2016-02-04
76	18.2	6.54	4.22	433	2016-02-04
84	13.6	6.17	4.09	433	2016-02-04
18					2016-02-04
532					2016-02-04
124					2016-02-04
32					2016-02-04
459					2016-02-04
355					2016-02-04
413	12.9	5.93	3.93	414	2016-02-04
545					2016-02-04
474					2016-02-04
404					2016-02-04
112	17.7	4.47	3.53	470	2016-02-04
91					2016-02-04
268	17.6	4.98	3.87	412	2016-02-04
232	19.4	5.51	4.01	486	2016-02-04
153	19	5.2	3.9	448	2016-02-04
109	16.6	5.38	3.9	405	2016-02-04
40					2016-02-04
61	16.9	4.68	3.89	438	2016-02-04
68	20.7	4.91	3.54	398	2016-02-04
286					2016-02-04
394					2016-02-04
52	15.7	6.51	4.58	484	2016-02-04
617	19.2	4.92	3.75	557	2016-02-04
460	22	4.1	3.77	502	2016-02-04
307	15.8	4.46	3.73	524	2016-02-04
99	15.2	4.86	4	450	2016-02-04
273	17.7	4.39	3.73	440	2016-02-04
295	14.9	4.57	4.11	427	2016-02-04
541					2016-02-04
22					2016-02-04
589	16.1	6.18	4.1	462	2016-02-04
159	16.5	4.2	4.32	412	2016-02-04
14					2016-02-04
519					2016-02-04
398					2016-02-04
258					2016-02-04
87					2016-02-04
214					2016-02-04
360					2016-02-04
405					2016-02-04
338					2016-02-04
235	15.6	5.1	3.67	364	2016-02-04
254	24.7	4.24	3.56	452	2016-02-04
432					2016-02-04
201					2016-02-04
143					2016-02-04
189	0.6	5.92	5.47		2016-02-04
164					2016-02-04
381					2016-02-04
101					2016-02-04
70					2016-02-04
431					2016-02-04
530					2016-02-04
324					2016-02-04
225					2016-02-04
27	21.9	5.29	3.93	492	2016-02-05
47	12.9	6.23	4.4	564	2016-02-05
125	24	6.55	4.23	578	2016-02-05
144	29.9	4.56	3.44	503	2016-02-05
253	11.9	6.99	3.92	565	2016-02-05
274	25.9	4.07	3.49	501	2016-02-05
192	16.3	7.55	4.52	560	2016-02-05
200	15.6	7.24	4.4	595	2016-02-05
361	20.5	6.98	5.06	540	2016-02-05
11	17	6.9	4.53	466	2016-02-05
466	12.1	6.65	4.37	585	2016-02-05
483	23.7	5.07	3.87	458	2016-02-05
632	20.7	6.05	4.14	541	2016-02-05
380	19.1	6.52	4.34	519	2016-02-05
8	22.7	5.24	3.95	545	2016-02-05
181	23.9	6.8	3.85	504	2016-02-05
24					2016-02-05
36	22.1	5.98	3.99	531	2016-02-05
37	10.7	6.32	4.42	596	2016-02-05
134	33.7	5.38	4.13	614	2016-02-05
209	22.4	7.36	3.87	536	2016-02-05
281	26.9	4.48	3.78	529	2016-02-05
269	15.5	6.05	4.2	496	2016-02-05
306	11.8	5.89	4.4	480	2016-02-05
54	21	5.49	4.25	468	2016-02-05
537	19.2	5.86	4.02	455	2016-02-05
113	21.2	4.82	3.58	365	2016-02-05
403					2016-02-05
188	19.8	5.22	4.34	525	2016-02-05
146	15.1	5.7	4.13	496	2016-02-05
384	17.9	7.49	4.55	525	2016-02-05
494	15.3	5.95	4.54	564	2016-02-05
183	18.3	5.99	3.83	591	2016-02-05
86	28.4	5.98	3.93	479	2016-02-05
543	22.5	6.04	4.04	547	2016-02-05
544	13.3	7.17	4.52	542	2016-02-05
547	13.2	7.65	3.63	446	2016-02-05
241	13.7	6.45	4.2	475	2016-02-05
410	18.3	6.35	3.88	528	2016-02-05
342	22.4	5.39	3.54	647	2016-02-05
173	30.6	4.56	3.71	523	2016-02-05
504	14.7	6.37	4.56	447	2016-02-05
179	12.3	5.26	4.08	470	2016-02-05
389	16.8	6.88	4.29	476	2016-02-05
2	25.8	4.44	3.88	495	2016-02-05
66	21.4	4.79	3.59	513	2016-02-05
119	21	6.21	4.12	441	2016-02-05
366	27.8	4.82	4.04	467	2016-02-05
369	18.3	5.67	4.26	471	2016-02-05
556					2016-02-05
291	19.3	5.67	4.19	530	2016-02-05
352					2016-02-05
292	15.9	6.58	4.28	460	2016-02-05
100	20.5	4.61	3.69	557	2016-02-05
490	13.4	7.15	4.36	580	2016-02-05
42	15.5	6.42	4.58	509	2016-02-05
406	21.7	5.46	3.9	526	2016-02-05
239	19.4	5.15	3.85	471	2016-02-05
103	16.9	6.58	4.39	465	2016-02-05
508					2016-02-05
195					2016-02-05
219					2016-02-05
267					2016-02-05
382					2016-02-05
477					2016-02-05
377					2016-02-05
216	18	6.18	4.3	441	2016-02-05
344	12.7	6.52	4.17	574	2016-02-05
74	17	6	4.19	543	2016-02-05
319					2016-02-05
90	28.1	4.61	3.67	581	2016-02-05
98	20	5.28	3.73	394	2016-02-05
236					2016-02-05
265	21.1	5.09	4.06	417	2016-02-05
193	15.1	4.79	3.97	431	2016-02-05
288					2016-02-05
233	16.8	6.06	4.21	499	2016-02-05
437					2016-02-05
385	18.4	6.45	4.54	599	2016-02-05
443	20.3	5.9	4.37	384	2016-02-05
299					2016-02-05
454	21.7	5.85	3.66	470	2016-02-05
553	18.5	5.44	3.73	491	2016-02-05
424					2016-02-05
643	28.6	4.41	3.44	417	2016-02-05
484	23.3	5.06	3.73	437	2016-02-05
89	25.9	3.94	3.73	486	2016-02-05
150	28	4.43	5.2	514	2016-02-05
645	25.7	5.33	3.51	438	2016-02-05
38	17.5	5.96	4.03	526	2016-02-05
457					2016-02-05
248	21.3	7.9	5.4	502	2016-02-05
170	23.8	5.61	4.31	559	2016-02-05
640	23.7	5.5	3.92	507	2016-02-05
60	24.1	5.28	3.5	488	2016-02-05
106	17.9	4.42	4.49	454	2016-02-05
379	20.2	5.92	3.89	573	2016-02-05
12	20.1	5.59	4.52	425	2016-02-05
451					2016-02-05
517	14.1	6.45	4.59	420	2016-02-05
636	26.1	4.62	3.92	466	2016-02-05
634	17.9	5.59	4.18	535	2016-02-05
631	12.2	6.33	4.35	436	2016-02-05
629	17.9	7.4	3.77	491	2016-02-05
627	23.5	4.34	4.34	502	2016-02-05
624	28.1	4.45	3.74	484	2016-02-05
622	19.3	5.89	4.23	588	2016-02-05
618	23.4	6.49	4.06	533	2016-02-05
579					2016-02-05
140					2016-02-05
523					2016-02-05
211					2016-02-05
375					2016-02-05
234					2016-02-05
359					2016-02-05
121					2016-02-05
392					2016-02-05
278					2016-02-05
346					2016-02-05
135	25.8	6.4	4.32	524	2016-02-05
132	20.8	4.62	3.68	474	2016-02-05
212					2016-02-05
535	9	4.95	5.38	446	2016-02-05
257					2016-02-05
453					2016-02-05
58					2016-02-05
323					2016-02-05
602					2016-02-05
485					2016-02-05
205					2016-02-05
114					2016-02-05
540					2016-02-05
411					2016-02-05
246					2016-02-05
528	12.9	7.06	4.53	485	2016-02-05
441					2016-02-05
63					2016-02-05
546					2016-02-05
287					2016-02-05
492					2016-02-05
45					2016-02-05
247					2016-02-05
336					2016-02-05
400					2016-02-05
435					2016-02-05
177	17.1	5.33	3.96	471	2016-02-05
616					2016-02-05
1	16.3	5.95	4.12	445	2016-02-05
393					2016-02-05
518					2016-02-05
251	9.8	5.75	3.98	526	2016-02-05
548	13.1	6.27	4.25	479	2016-02-05
447	22.6	6.9	4.49	562	2016-02-05
491	15.1	5.15	3.96	472	2016-02-05
158					2016-02-05
427	15.2	6.72	4.32	403	2016-02-05
418	14.4	5.97	4.3	491	2016-02-05
603	13	6.03	4.4	441	2016-02-05
604	11.8	5.38	4.41	532	2016-02-05
107					2016-02-05
396	12.3	6.17	4.11	518	2016-02-05
608					2016-02-05
92					2016-02-05
310					2016-02-05
356	13.6	5.9	4.15	462	2016-02-05
169					2016-02-05
470					2016-02-05
104					2016-02-05
426					2016-02-05
425					2016-02-05
480					2016-02-05
499					2016-02-05
433	11.3	7.81	4.92	468	2016-02-05
450	13.1	6.28	4.07	629	2016-02-05
6					2016-02-05
423					2016-02-05
335					2016-02-05
590					2016-02-05
407					2016-02-05
354					2016-02-05
118	22.3	5.11	3.75	567	2016-02-05
311	33.2	5.41	4.11	503	2016-02-05
421	18.1	6.23	3.99	585	2016-02-05
314	12.8	3.85	3.37	446	2016-02-05
245	15.5	5.9	4.09	713	2016-02-05
614	28	5.34	3.59	547	2016-02-05
95					2016-02-05
204	13.9	6.26	4.11	507	2016-02-05
78	22.2	4.08	3.77	549	2016-02-05
428	14.1	6.5	4.09	430	2016-02-05
414	13.4	5.15	4.08	362	2016-02-05
139	16.3	6.2	4.25	403	2016-02-05
178					2016-02-05
625	15.1	6.01	4.04	395	2016-02-05
598	16	4.58	3.81	371	2016-02-05
597	14.2	5.27	4.14	322	2016-02-05
208					2016-02-05
343					2016-02-05
64	15	5.95	4.18	359	2016-02-05
117	18	5.48	3.8	459	2016-02-05
180	16.6	5.67	4.05	453	2016-02-05
145	16.5	4.81	4.22	403	2016-02-05
633	13.4	4.51	4.03	501	2016-02-05
46	13	5.74	4.04	487	2016-02-05
277	15	5.21	4.34	358	2016-02-05
21					2016-02-05
264	17.1	5.69	4.16	388	2016-02-05
596	18.3	4.19	3.72	419	2016-02-05
175					2016-02-05
650	13.7	5.97	4.08	396	2016-02-05
142					2016-02-05
161	17.3	5.36	4	463	2016-02-05
194					2016-02-05
573					2016-02-05
599	12	4.93	4.21	390	2016-02-05
565	19.4	4.88	3.83	421	2016-02-05
82	17.2	6.17	4.17	439	2016-02-05
4	11	5.73	3.99	364	2016-02-05
476					2016-02-05
430					2016-02-05
498	12.7	6.66	4.43	454	2016-02-05
76	17.7	5.69	4.27	442	2016-02-05
84	13.7	6.11	4.12	438	2016-02-05
18					2016-02-05
532					2016-02-05
124					2016-02-05
32					2016-02-05
459					2016-02-05
355					2016-02-05
413	13.7	5.95	3.95	406	2016-02-05
545					2016-02-05
474					2016-02-05
404					2016-02-05
112	18.5	4.26	3.52	477	2016-02-05
91					2016-02-05
268	18.9	4.9	3.82	407	2016-02-05
232	18.2	5.18	4.1	507	2016-02-05
153	19.3	5.23	3.89	458	2016-02-05
109	16.3	5.05	3.88	404	2016-02-05
40					2016-02-05
61	19.1	4.82	3.88	423	2016-02-05
68	21.1	5.01	3.49	389	2016-02-05
286					2016-02-05
394					2016-02-05
52	15.2	6.73	4.56	485	2016-02-05
617	17.9	4.8	3.73	549	2016-02-05
460	20.2	4.39	3.75	508	2016-02-05
307	17.3	4.45	3.71	532	2016-02-05
99	14.3	4.88	4.04	451	2016-02-05
273	17.7	3.8	3.5	449	2016-02-05
295	13.9	4.41	4.13	436	2016-02-05
541					2016-02-05
22					2016-02-05
589	16.5	6.14	4.21	486	2016-02-05
159	16.8	3.74	4.34	378	2016-02-05
14					2016-02-05
519					2016-02-05
398					2016-02-05
258					2016-02-05
87					2016-02-05
214					2016-02-05
360					2016-02-05
405					2016-02-05
338					2016-02-05
235	16.6	4.9	3.69	438	2016-02-05
254	24.7	4.34	3.6	446	2016-02-05
432					2016-02-05
201					2016-02-05
143					2016-02-05
189	0	5.92	5.47	411	2016-02-05
164					2016-02-05
381					2016-02-05
101					2016-02-05
70					2016-02-05
431					2016-02-05
530					2016-02-05
324					2016-02-05
225					2016-02-05
27	21.5	5.57	3.91	491	2016-02-06
47	13	5.43	4.47	571	2016-02-06
125	25.2	6.78	4.22	576	2016-02-06
144	30.7	4.11	3.54	501	2016-02-06
253	11.6	6.69	3.91	564	2016-02-06
274	26.1	4	3.4	491	2016-02-06
192	16.2	7.51	4.46	559	2016-02-06
200	15	6.91	4.36	594	2016-02-06
361	21.1	6.84	4.96	518	2016-02-06
11	15.2	6.69	4.53	469	2016-02-06
466	15.4	6.59	4.39	583	2016-02-06
483	25.9	4.54	3.88	455	2016-02-06
632	20.8	6.56	4.12	525	2016-02-06
380	19.2	6.36	4.28	511	2016-02-06
8	22.9	5.07	3.91	547	2016-02-06
181	24.5	7.76	3.8	508	2016-02-06
24					2016-02-06
36	21.6	6.23	3.91	523	2016-02-06
37	10.5	6.3	4.46	590	2016-02-06
134	34.6	5.37	4.09	605	2016-02-06
209	28.8	6.38	3.77	547	2016-02-06
281	27.9	4.51	3.71	531	2016-02-06
269	11.6	6.03	4.24	482	2016-02-06
306	12	5.9	4.34	495	2016-02-06
54	23.5	5.27	4.21	466	2016-02-06
537	19.1	5.78	3.98	454	2016-02-06
113	21.3	4.77	3.57	361	2016-02-06
403					2016-02-06
188	20.1	5.04	4.32	511	2016-02-06
146	16.1	5.98	4.03	499	2016-02-06
384	19	7.44	4.44	539	2016-02-06
494	15.2	5.9	4.53	528	2016-02-06
183	20.8	6.29	3.88	605	2016-02-06
86	29.8	6.08	3.82	476	2016-02-06
543	21.9	6.04	4	545	2016-02-06
544	13.4	7.29	4.5	536	2016-02-06
547	15.6	7.39	3.45	479	2016-02-06
241	15.1	6.54	4.14	473	2016-02-06
410	18	6.37	3.83	523	2016-02-06
342	24.2	4.62	3.37	678	2016-02-06
173	30.7	4.25	3.68	518	2016-02-06
504	14	6.31	4.59	426	2016-02-06
179	12.8	5.6	4.11	472	2016-02-06
389	16.7	7.17	4.23	467	2016-02-06
2	30.3	4.42	3.86	487	2016-02-06
66	21.6	5.41	3.54	493	2016-02-06
119	22.2	6.09	4.1	431	2016-02-06
366	29.7	4.67	3.99	459	2016-02-06
369	17.1	5.56	4.23	454	2016-02-06
556					2016-02-06
291	21.4	5.63	4.16	528	2016-02-06
352					2016-02-06
292	16.2	6.38	4.24	464	2016-02-06
100	17.8	4.58	3.68	554	2016-02-06
490	15	7.26	4.35	578	2016-02-06
42	16.5	6.32	4.53	495	2016-02-06
406	22.5	5.48	3.81	517	2016-02-06
239	19.7	5.05	3.87	457	2016-02-06
103	17.4	6.5	4.37	469	2016-02-06
508					2016-02-06
195					2016-02-06
219					2016-02-06
267					2016-02-06
382					2016-02-06
477					2016-02-06
377					2016-02-06
216	18.2	6.06	4.25	427	2016-02-06
344	12.3	6.44	4.17	568	2016-02-06
74	16.2	5.85	4.16	551	2016-02-06
319					2016-02-06
90	27.6	4.63	3.58	563	2016-02-06
98	20.3	5.03	3.68	388	2016-02-06
236					2016-02-06
265	21.8	6.14	3.85	425	2016-02-06
193	14.6	4.85	3.95	428	2016-02-06
288					2016-02-06
233	17.5	5.91	4.16	486	2016-02-06
437					2016-02-06
385	17.4	6.94	4.53	589	2016-02-06
443	19.9	6.27	4.3	389	2016-02-06
299					2016-02-06
454	22.9	5.35	3.74	472	2016-02-06
553	18.9	5.68	3.71	470	2016-02-06
424					2016-02-06
643	26.2	4.55	3.5	424	2016-02-06
484	23.6	5.26	3.62	435	2016-02-06
89	25.7	4.38	3.68	498	2016-02-06
150	18.7	4.27	5.14	523	2016-02-06
645	26	5.25	3.62	438	2016-02-06
38	17.6	5.27	4	503	2016-02-06
457					2016-02-06
248	18.3	8.03	5.26	491	2016-02-06
170	24.2	5.68	4.31	554	2016-02-06
640	24.3	5.41	3.94	513	2016-02-06
60	23.3	5.36	3.46	492	2016-02-06
106	19.7	3.85	4.35	447	2016-02-06
379	20.3	5.83	3.82	562	2016-02-06
12	21.1	5.17	4.36	441	2016-02-06
451					2016-02-06
517	13.5	6.26	4.59	414	2016-02-06
636	24.7	4.77	3.89	452	2016-02-06
634	20	5.97	4.14	537	2016-02-06
631	11.5	6.54	4.4	443	2016-02-06
629	19.3	7.09	3.81	487	2016-02-06
627	23.9	4.61	4.26	500	2016-02-06
624	25.1	4.6	3.94	485	2016-02-06
622	19	6.05	4.24	577	2016-02-06
618	22.7	6.39	3.98	514	2016-02-06
579					2016-02-06
140					2016-02-06
523					2016-02-06
211					2016-02-06
375					2016-02-06
234					2016-02-06
359					2016-02-06
121					2016-02-06
392					2016-02-06
278					2016-02-06
346					2016-02-06
135	23.7	6.96	4.25	484	2016-02-06
132	21.9	4.48	3.7	456	2016-02-06
212					2016-02-06
535	11.9	5.58	5.28	457	2016-02-06
257					2016-02-06
453					2016-02-06
58					2016-02-06
323					2016-02-06
602					2016-02-06
485					2016-02-06
205					2016-02-06
114					2016-02-06
540					2016-02-06
411					2016-02-06
246					2016-02-06
528	12.8	7.43	4.52	482	2016-02-06
441					2016-02-06
63					2016-02-06
546					2016-02-06
287					2016-02-06
492					2016-02-06
45					2016-02-06
247					2016-02-06
336					2016-02-06
400					2016-02-06
435					2016-02-06
177	17.4	5.29	3.92	471	2016-02-06
616					2016-02-06
1	15.3	6.21	4.12	439	2016-02-06
393					2016-02-06
518					2016-02-06
251	10.4	5.69	3.96	510	2016-02-06
548	13.1	6.27	4.23	468	2016-02-06
447	22.4	6.55	4.44	575	2016-02-06
491	15.9	5.68	4.17	503	2016-02-06
158					2016-02-06
427	14.4	6.75	4.31	397	2016-02-06
418	14.7	6.4	4.29	481	2016-02-06
603	12.3	6.01	4.38	514	2016-02-06
604	11.8	5.6	4.38	431	2016-02-06
107					2016-02-06
396	12.5	6.06	4.08	506	2016-02-06
608					2016-02-06
92					2016-02-06
310					2016-02-06
356	14.1	5.78	4.11	455	2016-02-06
169					2016-02-06
470					2016-02-06
104					2016-02-06
426					2016-02-06
425					2016-02-06
480					2016-02-06
499					2016-02-06
433	10.5	7.83	4.91	475	2016-02-06
450	13	6.13	4.06	615	2016-02-06
6					2016-02-06
423					2016-02-06
335					2016-02-06
590					2016-02-06
407					2016-02-06
354					2016-02-06
118	22.7	5.37	3.75	547	2016-02-06
311	32.7	5.51	4.11	517	2016-02-06
421	17.4	5.75	3.93	589	2016-02-06
314	13.7	4.14	3.31	433	2016-02-06
245	15.1	6.03	3.96	690	2016-02-06
614	29.8	5.52	3.48	523	2016-02-06
95					2016-02-06
204	12.4	6.04	4.13	505	2016-02-06
78	20.1	4.25	3.76	522	2016-02-06
428	14.1	6.22	4.04	432	2016-02-06
414	13.8	5.14	4.05	365	2016-02-06
139	16.7	6.06	4.24	405	2016-02-06
178					2016-02-06
625	14.9	6.03	4.02	386	2016-02-06
598	16.5	4.81	3.74	373	2016-02-06
597	13.6	5.65	4.17	308	2016-02-06
208					2016-02-06
343					2016-02-06
64	14.4	6.1	4.18	348	2016-02-06
117	18.5	5.66	3.79	447	2016-02-06
180	17.3	5.94	4.03	434	2016-02-06
145	15.4	5	4.19	393	2016-02-06
633	14.1	4.51	4.04	486	2016-02-06
46	13.4	5.48	4.02	483	2016-02-06
277	13.1	5.36	4.32	353	2016-02-06
21					2016-02-06
264	16.8	5.6	4.13	381	2016-02-06
596	18.9	4.25	3.7	416	2016-02-06
175					2016-02-06
650	15	5.83	4.04	401	2016-02-06
142					2016-02-06
161	17.4	5.18	4.04	489	2016-02-06
194					2016-02-06
573					2016-02-06
599	12.8	4.83	4.2	391	2016-02-06
565	19.7	4.86	3.77	484	2016-02-06
82	17.1	6.15	4.15	418	2016-02-06
4	12.3	6.18	4	357	2016-02-06
476					2016-02-06
430					2016-02-06
498	13.3	6.36	4.41	438	2016-02-06
76	17.9	5.72	4.27	445	2016-02-06
84	13.4	6.19	4.12	412	2016-02-06
18					2016-02-06
532					2016-02-06
124					2016-02-06
32					2016-02-06
459					2016-02-06
355					2016-02-06
413	13.6	5.85	3.93	399	2016-02-06
545					2016-02-06
474					2016-02-06
404					2016-02-06
112	19.6	4.54	3.48	461	2016-02-06
91					2016-02-06
268	18.6	4.85	3.78	397	2016-02-06
232	19	5.42	4.12	474	2016-02-06
153	18.2	5.16	3.87	438	2016-02-06
109	15.4	5.37	3.92	402	2016-02-06
40					2016-02-06
61	18.4	4.74	3.88	421	2016-02-06
68	21.8	4.83	3.45	387	2016-02-06
286					2016-02-06
394					2016-02-06
52	15.9	6.72	4.46	483	2016-02-06
617	17.6	4.75	3.71	544	2016-02-06
460	19.6	4.65	3.66	485	2016-02-06
307	17.2	4.82	3.69	508	2016-02-06
99	15.6	5.02	4.05	443	2016-02-06
273	18.8	4.13	3.62	444	2016-02-06
295	13.5	4.49	4.12	426	2016-02-06
541					2016-02-06
22					2016-02-06
589	16.4	6.16	4.22	473	2016-02-06
159	17.3	4.38	4.33	354	2016-02-06
14					2016-02-06
519					2016-02-06
398					2016-02-06
258					2016-02-06
87					2016-02-06
214					2016-02-06
360					2016-02-06
405					2016-02-06
338					2016-02-06
235	14.5	4.65	3.75	366	2016-02-06
254	22.7	3.8	3.67	433	2016-02-06
432					2016-02-06
201					2016-02-06
143					2016-02-06
189	2	5.9	5.39	368	2016-02-06
164					2016-02-06
381					2016-02-06
101					2016-02-06
70					2016-02-06
431					2016-02-06
530					2016-02-06
324					2016-02-06
225					2016-02-06
27	22.1	5.56	3.89	502	2016-02-07
47	12.3	5.21	4.49	542	2016-02-07
125	24.5	6.52	4.28	569	2016-02-07
144	30.1	4.37	3.52	503	2016-02-07
253	10.9	6.44	3.91	559	2016-02-07
274	28.3	3.87	3.42	497	2016-02-07
192	16.7	7.55	4.44	573	2016-02-07
200	15.4	6.97	4.36	588	2016-02-07
361	23.2	6.47	4.85	537	2016-02-07
11	16.3	6.88	4.55	490	2016-02-07
466	15.6	6.7	4.33	584	2016-02-07
483	23.4	5.12	3.97	454	2016-02-07
632	21.3	6.62	4.11	528	2016-02-07
380	19.6	6.87	4.32	503	2016-02-07
8	21.7	5.2	3.98	560	2016-02-07
181	24.5	7.41	3.92	513	2016-02-07
24					2016-02-07
36	20.8	6.16	3.97	530	2016-02-07
37	10.4	6.5	4.49	575	2016-02-07
134	33.3	5.15	4.14	606	2016-02-07
209	28.9	6.18	3.96	557	2016-02-07
281	26.9	5.04	3.74	526	2016-02-07
269	12.3	6.17	4.27	476	2016-02-07
306	12.8	5.38	4.28	497	2016-02-07
54	22.2	5.79	4.22	460	2016-02-07
537					2016-02-07
113	20.8	4.95	3.57	365	2016-02-07
403					2016-02-07
188	20.6	4.84	4.38	515	2016-02-07
146	16.1	5.82	4.01	498	2016-02-07
384	19	6.94	4.38	530	2016-02-07
494	15.1	6.11	4.48	529	2016-02-07
183	19	6.02	3.87	606	2016-02-07
86	29.5	6.16	3.87	477	2016-02-07
543	21.8	5.99	4.03	533	2016-02-07
544	13.7	7.14	4.46	547	2016-02-07
547	17.5	6.67	3.64	462	2016-02-07
241	14.4	6.54	4.13	463	2016-02-07
410	18.3	6.19	3.81	533	2016-02-07
342	25.8	4.27	3.26	655	2016-02-07
173	29	4.42	3.7	507	2016-02-07
504	14.6	6.36	4.58	436	2016-02-07
179	12.1	5.46	4.14	471	2016-02-07
389	16.9	6.7	4.15	523	2016-02-07
2	27.8	5.37	3.84	486	2016-02-07
66	21.8	5.61	3.56	500	2016-02-07
119	21	6.05	4.08	427	2016-02-07
366	28.7	5.11	4.12	469	2016-02-07
369	16.8	5.55	4.2	464	2016-02-07
556					2016-02-07
291	19.5	6.11	4.21	523	2016-02-07
352					2016-02-07
292	16.1	6.64	4.23	462	2016-02-07
100	16.9	4.67	3.7	545	2016-02-07
490	14.7	7.14	4.29	583	2016-02-07
42	15.6	6.34	4.58	515	2016-02-07
406	21.4	5.29	3.76	512	2016-02-07
239	20.4	4.85	3.85	462	2016-02-07
103	16.9	6.53	4.35	463	2016-02-07
508					2016-02-07
195					2016-02-07
219					2016-02-07
267					2016-02-07
382					2016-02-07
477					2016-02-07
377					2016-02-07
216	18.1	6.1	4.31	435	2016-02-07
344	12.1	6.88	4.18	574	2016-02-07
74	16	5.82	4.12	541	2016-02-07
319					2016-02-07
90	27.3	4.56	3.64	565	2016-02-07
98	20	5	3.63	416	2016-02-07
236					2016-02-07
265	19.2	5.62	3.9	413	2016-02-07
193	15.4	4.91	3.95	438	2016-02-07
288					2016-02-07
233	16.4	5.71	4.19	499	2016-02-07
437					2016-02-07
385	17.5	6.83	4.55	589	2016-02-07
443	20.2	6.48	4.27	386	2016-02-07
299					2016-02-07
454	22.2	5.69	3.71	476	2016-02-07
553	20.2	5.19	3.79	465	2016-02-07
424					2016-02-07
643	26.8	4.57	3.48	414	2016-02-07
484	22.2	5.51	3.67	439	2016-02-07
89	25.7	4.43	3.66	500	2016-02-07
150	18.3	4.22	5.04	529	2016-02-07
645	24.2	5.17	3.61	447	2016-02-07
38	17.6	5.23	4.01	503	2016-02-07
457	8	6.54	5.97		2016-02-07
248	14	7.83	5.16	493	2016-02-07
170	23.3	5.72	4.27	561	2016-02-07
640	24.2	5.32	3.93	503	2016-02-07
60	22.3	5.3	3.41	502	2016-02-07
106	19.5	4.02	4.21	429	2016-02-07
379	19.5	5.69	3.89	558	2016-02-07
12	21.6	5.59	4.11	435	2016-02-07
451					2016-02-07
517	13.8	6.37	4.56	414	2016-02-07
636	24.3	5.23	3.86	454	2016-02-07
634	19.7	6.13	4.17	538	2016-02-07
631	12.4	6.46	4.4	435	2016-02-07
629	19.8	6.23	3.84	489	2016-02-07
627	19.1	4.52	4.2	506	2016-02-07
624	25.4	4.51	3.94	480	2016-02-07
622	18.2	6.05	4.24	593	2016-02-07
618	22.5	7.03	3.95	503	2016-02-07
579					2016-02-07
140					2016-02-07
523					2016-02-07
211					2016-02-07
375					2016-02-07
234					2016-02-07
359					2016-02-07
121					2016-02-07
392					2016-02-07
278					2016-02-07
346					2016-02-07
135	25.2	7.21	4.3	518	2016-02-07
132	21.2	4.7	3.68	473	2016-02-07
212					2016-02-07
535	14.2	6.85	5.11	461	2016-02-07
257					2016-02-07
453					2016-02-07
58					2016-02-07
323					2016-02-07
602					2016-02-07
485					2016-02-07
205					2016-02-07
114					2016-02-07
540					2016-02-07
411					2016-02-07
246					2016-02-07
528	12.5	7.74	4.5	485	2016-02-07
441					2016-02-07
63					2016-02-07
546					2016-02-07
287					2016-02-07
492					2016-02-07
45					2016-02-07
247					2016-02-07
336					2016-02-07
400					2016-02-07
435					2016-02-07
177	17.7	5.52	3.85	469	2016-02-07
616					2016-02-07
1	15.3	6.41	4.02	444	2016-02-07
393					2016-02-07
518					2016-02-07
251	10.2	5.77	3.92	511	2016-02-07
548	12.3	6.27	4.22	462	2016-02-07
447	23	6.21	4.34	571	2016-02-07
491	14.3	5.78	4.17	503	2016-02-07
158					2016-02-07
427	14.2	6.76	4.24	398	2016-02-07
418	15.4	6.13	4.25	476	2016-02-07
603	12.7	5.97	4.3	439	2016-02-07
604	12.4	5.54	4.37	429	2016-02-07
107					2016-02-07
396	12.1	5.97	4.07	507	2016-02-07
608					2016-02-07
92					2016-02-07
310					2016-02-07
356	14.1	5.85	4.07	455	2016-02-07
169					2016-02-07
470					2016-02-07
104					2016-02-07
426					2016-02-07
425					2016-02-07
480					2016-02-07
499					2016-02-07
433	10.3	7.45	4.86	482	2016-02-07
450	13.3	5.75	4	618	2016-02-07
6					2016-02-07
423					2016-02-07
335					2016-02-07
590					2016-02-07
407					2016-02-07
354					2016-02-07
118	21.9	6.14	3.69	539	2016-02-07
311	31	5.19	4.14	521	2016-02-07
421	17.9	5.85	3.92	599	2016-02-07
314	14.7	4.07	3.35	431	2016-02-07
245	13.2	5.9	3.92	689	2016-02-07
614	28.6	5.72	3.46	530	2016-02-07
95					2016-02-07
204	11.5	6.22	4.13	492	2016-02-07
78	21	4.25	3.66	527	2016-02-07
428	14.2	6.18	3.99	441	2016-02-07
414	13.9	4.78	4.02	365	2016-02-07
139	16.6	5.83	4.25	405	2016-02-07
178					2016-02-07
625	14.4	5.88	4	379	2016-02-07
598	15.9	4.78	3.67	374	2016-02-07
597	14.6	5.79	4.16	329	2016-02-07
208					2016-02-07
343					2016-02-07
64	14.3	5.8	4.1	353	2016-02-07
117	19.3	5.46	3.8	478	2016-02-07
180	16.7	6.05	3.99	433	2016-02-07
145	15.2	4.89	4.22	404	2016-02-07
633	13.3	4.59	4	477	2016-02-07
46	12.8	5.78	4.03	484	2016-02-07
277	13.5	5.41	4.26	361	2016-02-07
21					2016-02-07
264	16.6	5.6	4.09	381	2016-02-07
596	19	5.04	3.59	425	2016-02-07
175					2016-02-07
650	15	5.76	3.95	404	2016-02-07
142					2016-02-07
161	16.1	5.09	4.03	463	2016-02-07
194					2016-02-07
573					2016-02-07
599	13.1	4.58	4.15	384	2016-02-07
565	19	4.81	3.72	415	2016-02-07
82	18.3	6.09	4.13	441	2016-02-07
4	13	6.72	3.91	352	2016-02-07
476					2016-02-07
430					2016-02-07
498	12.6	6.19	4.39	451	2016-02-07
76	17	5.54	4.32	442	2016-02-07
84	13.8	6.23	4.01	421	2016-02-07
18					2016-02-07
532					2016-02-07
124					2016-02-07
32					2016-02-07
459					2016-02-07
355					2016-02-07
413	14.3	5.6	3.9	404	2016-02-07
545					2016-02-07
474					2016-02-07
404					2016-02-07
112	20	4.45	3.43	472	2016-02-07
91					2016-02-07
268	18.3	4.59	3.78	399	2016-02-07
232	18.1	5.79	4.08	482	2016-02-07
153	15.2	5.17	3.9	436	2016-02-07
109	16.4	5.32	3.9	401	2016-02-07
40					2016-02-07
61	18.5	4.88	3.87	395	2016-02-07
68	21.5	4.98	3.44	390	2016-02-07
286					2016-02-07
394					2016-02-07
52	16.9	6.63	4.39	494	2016-02-07
617	16.7	4.73	3.71	544	2016-02-07
460	21.5	4.53	3.52	479	2016-02-07
307	17.7	4.71	3.67	485	2016-02-07
99	15.4	4.85	4.03	458	2016-02-07
273	18.3	4.16	3.58	458	2016-02-07
295	13.7	4.78	4.05	428	2016-02-07
541					2016-02-07
22					2016-02-07
589	16.6	6.05	4.21	472	2016-02-07
159	16.4	4.33	4.32	555	2016-02-07
14					2016-02-07
519					2016-02-07
398					2016-02-07
258					2016-02-07
87					2016-02-07
214					2016-02-07
360					2016-02-07
405					2016-02-07
338					2016-02-07
235	13.4	4.45	3.77	378	2016-02-07
254	22.6	4.15	3.69	440	2016-02-07
432					2016-02-07
201					2016-02-07
143					2016-02-07
189	1.6	7.01	5.32		2016-02-07
15					2016-02-07
231					2016-02-07
164					2016-02-07
381					2016-02-07
101					2016-02-07
70					2016-02-07
431					2016-02-07
530					2016-02-07
324					2016-02-07
225					2016-02-07
27	23.6	5.44	3.86	491	2016-02-08
47	11.6	5.23	4.5	568	2016-02-08
125	24.3	7.08	4.32	564	2016-02-08
144	30.2	4.43	3.52	505	2016-02-08
253	11.8	6.74	3.93	537	2016-02-08
274	24.8	4.08	3.45	497	2016-02-08
192	16.6	7.53	4.43	577	2016-02-08
200	14.9	7.05	4.38	592	2016-02-08
361	23	6.24	4.81	530	2016-02-08
11	17.5	6.84	4.52	479	2016-02-08
466	15.4	6.67	4.33	586	2016-02-08
483	23.9	4.86	3.96	454	2016-02-08
632	21.4	6.33	4.1	533	2016-02-08
380	19.8	6.89	4.33	498	2016-02-08
8	22.2	5.02	3.98	550	2016-02-08
181	25.3	7.15	3.93	524	2016-02-08
24					2016-02-08
36	21.2	5.91	4.01	533	2016-02-08
37	10.4	6.4	4.45	641	2016-02-08
134	33.3	5.55	4.12	600	2016-02-08
209	29	6.2	4.04	552	2016-02-08
281	26.9	5.04	3.81	529	2016-02-08
269	13.3	5.71	4.25	485	2016-02-08
306	12.7	5.38	4.28	490	2016-02-08
54	21.5	5.87	4.22	474	2016-02-08
537	7.7	5.71	4		2016-02-08
113	21.1	4.95	3.61	365	2016-02-08
403					2016-02-08
188	19.7	5.19	4.36	521	2016-02-08
146	15.6	6.33	4.08	500	2016-02-08
384	19.2	6.89	4.42	572	2016-02-08
494	15.1	5.91	4.45	546	2016-02-08
183	19.5	6.12	3.8	578	2016-02-08
86	28.7	5.78	3.92	490	2016-02-08
543	22.3	6.22	4.05	569	2016-02-08
544	13.7	7.33	4.47	537	2016-02-08
547	18.2	6.62	3.86	465	2016-02-08
241	14.7	6.28	4.15	484	2016-02-08
410	18.4	6.33	3.81	520	2016-02-08
342	25.7	4.2	3.28	660	2016-02-08
173	29.1	4.54	3.72	515	2016-02-08
504	14.4	6.25	4.55	449	2016-02-08
179	11.4	6.06	4.18	458	2016-02-08
389	17.5	6.41	4.15	473	2016-02-08
2	30.4	4.88	3.8	494	2016-02-08
66	21.3	5.42	3.54	505	2016-02-08
119	21.2	5.96	4.1	433	2016-02-08
366	42.7	4.85	4.08	465	2016-02-08
369	17.5	5.73	4.17	461	2016-02-08
556					2016-02-08
291	20.3	6.18	4.19	515	2016-02-08
[truncated: 6,237 more rows]

## Sheet: March 2016
Animal Number	Day Production	Fat indication	Protein indication	Weight	Date
27	20.5	5.56	4.09	505	2016-03-01
47	11.9	5.59	4.33	587	2016-03-01
125	21	5.57	4.14	583	2016-03-01
144	29.2	3.43	3.56	499	2016-03-01
253					2016-03-01
274	23.8	3.95	3.37	489	2016-03-01
192	15.2	7.29	4.53	653	2016-03-01
200	12.6	6.82	4.39	600	2016-03-01
361	24.4	5.44	4.24	557	2016-03-01
11	13.6	6.01	4.48	492	2016-03-01
466					2016-03-01
483	20.3	4.57	3.82	455	2016-03-01
632	17.9	5.71	4.25	548	2016-03-01
380	15.5	6.66	4.32	527	2016-03-01
8	20	3.72	3.99	568	2016-03-01
181	21.8	7.18	4.02	509	2016-03-01
24	28.1	5.52	4.07	589	2016-03-01
36	19.3	5.66	4.03	546	2016-03-01
37					2016-03-01
134	31.1	5.08	3.94	609	2016-03-01
209	22.8	5.54	3.8	569	2016-03-01
281	24.4	4.71	3.78	545	2016-03-01
269	14.8	5.89	4.27	504	2016-03-01
306	11.9	5.54	4.25	506	2016-03-01
54	18.3	5.71	4.13	479	2016-03-01
537	17.4	5.1	4.03	458	2016-03-01
113	18.8	5	3.63	387	2016-03-01
403					2016-03-01
188	21.9	4.93	4.06	543	2016-03-01
146	14.7	5.43	4.14	502	2016-03-01
384	15	6.55	4.41	540	2016-03-01
494	13.4	5.47	4.47	533	2016-03-01
183					2016-03-01
86	24.7	5.61	3.96	504	2016-03-01
543	20.1	5.61	4.05	541	2016-03-01
544	13.2	7.28	4.45	548	2016-03-01
547	18.4	6.32	3.94	482	2016-03-01
241	11.3	6.22	4.06	477	2016-03-01
410	17.8	5.72	3.79	546	2016-03-01
342	24.3	4.34	3.22	651	2016-03-01
173	38.1	4.15	3.59	515	2016-03-01
504	14	5.72	4.59	448	2016-03-01
179	11.9	6.04	4.28	480	2016-03-01
389	15	6.22	4.29	484	2016-03-01
2	23	5.34	3.98	479	2016-03-01
66	20.2	4.37	3.37	516	2016-03-01
119	18.8	5.1	3.99	447	2016-03-01
366	24.3	5.04	4.1	466	2016-03-01
369	16.5	4.57	4	476	2016-03-01
556	21.5	4.94	4.03	470	2016-03-01
291	17.9	6.1	4.23	535	2016-03-01
352					2016-03-01
292	14.6	6.36	4.2	473	2016-03-01
100	19.1	4.67	3.55	569	2016-03-01
490	11.5	7.14	4.35	585	2016-03-01
42	15.5	5.57	4.56	534	2016-03-01
406	21.4	5.64	3.97	527	2016-03-01
239	16.7	4.8	3.87	469	2016-03-01
103	15.7	6.28	4.58	478	2016-03-01
508					2016-03-01
195					2016-03-01
219					2016-03-01
267					2016-03-01
382					2016-03-01
477					2016-03-01
377					2016-03-01
216	15.8	5.42	4.32	444	2016-03-01
344	12.2	6.02	4	580	2016-03-01
74	13.5	5.83	4.13	550	2016-03-01
319					2016-03-01
90	25	4.68	3.79	570	2016-03-01
98	18.1	4.29	3.51	402	2016-03-01
236					2016-03-01
265	18.5	5.46	3.88	432	2016-03-01
193	13.6	4.93	3.97	448	2016-03-01
288					2016-03-01
233	15.1	5.99	4.08	505	2016-03-01
437					2016-03-01
385	15.7	6.01	4.5	606	2016-03-01
443	16.2	6.19	4.13	385	2016-03-01
299					2016-03-01
454	17.2	5.68	3.79	500	2016-03-01
553	18.3	4.44	3.45	493	2016-03-01
424					2016-03-01
643	24.4	4.07	3.56	426	2016-03-01
484	20.8	5.6	3.73	445	2016-03-01
89	20.7	4.37	3.83	505	2016-03-01
150	24.3	4.47	4.05	539	2016-03-01
645	21.6	4.95	3.95	455	2016-03-01
38	16.7	4.73	4.04	536	2016-03-01
457	28.4	5.24	3.76	478	2016-03-01
248	23.3	4.93	3.8	492	2016-03-01
170	20.4	5.89	4.34	575	2016-03-01
640	9.7	5.74	4.38	461	2016-03-01
60	22.9	5.37	3.56	516	2016-03-01
106	20.8	4.73	3.93	440	2016-03-01
379	18.5	5.09	3.99	576	2016-03-01
12	22.7	4.92	3.78	428	2016-03-01
451	17.5	4.16	3.71	455	2016-03-01
517	13.9	6.39	4.47	423	2016-03-01
636	24.1	4.53	3.95	474	2016-03-01
634	18.4	5.31	4.15	535	2016-03-01
631	12	6.12	4.35	454	2016-03-01
629	17.1	6.18	3.68	491	2016-03-01
627	30.1	4.6	3.65	493	2016-03-01
624	24.4	4.41	3.74	487	2016-03-01
622	15.3	7.09	4.4	576	2016-03-01
618	20.7	6.21	4.08	515	2016-03-01
579					2016-03-01
140					2016-03-01
523					2016-03-01
211					2016-03-01
375					2016-03-01
234					2016-03-01
359					2016-03-01
121					2016-03-01
392					2016-03-01
278					2016-03-01
346					2016-03-01
135	22.6	6.11	4.36	535	2016-03-01
132	19.7	4.3	3.66	489	2016-03-01
212					2016-03-01
535	24.5	4.5	3.61	474	2016-03-01
257					2016-03-01
453					2016-03-01
58					2016-03-01
323					2016-03-01
602					2016-03-01
485					2016-03-01
205					2016-03-01
114					2016-03-01
540					2016-03-01
411					2016-03-01
246					2016-03-01
528	10.5	7.24	4.44	504	2016-03-01
441					2016-03-01
63					2016-03-01
546					2016-03-01
287					2016-03-01
492					2016-03-01
45					2016-03-01
247					2016-03-01
336					2016-03-01
400					2016-03-01
435					2016-03-01
177	16.6	4.4	3.85	482	2016-03-01
616					2016-03-01
1					2016-03-01
393					2016-03-01
518					2016-03-01
251					2016-03-01
548					2016-03-01
447	24	5.43	3.91	583	2016-03-01
491					2016-03-01
158					2016-03-01
427					2016-03-01
418	14.7	5.64	4.4	517	2016-03-01
603	11.2	5.25	4.29	450	2016-03-01
604	11.9	5.18	4.41	440	2016-03-01
107					2016-03-01
396	12.1	6.24	4.13	516	2016-03-01
608					2016-03-01
92					2016-03-01
310					2016-03-01
356	13	4.45	4.04	465	2016-03-01
169					2016-03-01
470					2016-03-01
104					2016-03-01
426					2016-03-01
425					2016-03-01
480					2016-03-01
499					2016-03-01
433					2016-03-01
450	12.6	5.67	3.89	629	2016-03-01
6					2016-03-01
423					2016-03-01
335					2016-03-01
590					2016-03-01
407					2016-03-01
354					2016-03-01
118	20.5	5.05	3.63	585	2016-03-01
311	29.1	5.19	4.19	528	2016-03-01
421	18.1	5.69	3.94	611	2016-03-01
314	13.9	4.04	3.58	459	2016-03-01
245	12.3	6.45	4.23	677	2016-03-01
614	24.5	5.14	3.6	528	2016-03-01
95					2016-03-01
204	13.5	5.61	4.04	521	2016-03-01
78	21	4.06	3.69	550	2016-03-01
428	13.1	5.6	3.98	461	2016-03-01
414	12.5	4.6	4.08	378	2016-03-01
139	15.3	4.97	4.15	416	2016-03-01
178					2016-03-01
625	13.7	5.13	3.84	394	2016-03-01
598	16.1	4.21	3.72	386	2016-03-01
597	15.8	4.86	4.07	326	2016-03-01
208					2016-03-01
343					2016-03-01
64	13.9	4.82	3.96	371	2016-03-01
117	17.6	4.48	3.64	480	2016-03-01
180	14.5	4.88	4.09	456	2016-03-01
145	15.2	3.99	4.08	404	2016-03-01
633	13.2	4.43	3.85	508	2016-03-01
46	12.9	5.13	4.11	507	2016-03-01
277	14.6	5.25	4.18	370	2016-03-01
21					2016-03-01
264	14.8	5.35	4.1	401	2016-03-01
596	18.5	4.55	3.55	422	2016-03-01
175					2016-03-01
650	14.5	5.16	3.88	423	2016-03-01
142					2016-03-01
161	16.4	5	3.95	477	2016-03-01
194					2016-03-01
573					2016-03-01
599	12.6	4.78	3.98	404	2016-03-01
565	18	4.76	3.77	427	2016-03-01
82	14.1	6.03	4.13	435	2016-03-01
4	13.2	6.09	3.98	366	2016-03-01
476					2016-03-01
430					2016-03-01
498	13.2	6.51	4.39	468	2016-03-01
76	16.9	5.26	4.26	457	2016-03-01
84	12.3	5.81	4.09	499	2016-03-01
18					2016-03-01
532					2016-03-01
124					2016-03-01
32					2016-03-01
459					2016-03-01
355					2016-03-01
413	14.5	5.05	3.85	417	2016-03-01
545					2016-03-01
474					2016-03-01
404					2016-03-01
112	18.6	5.17	3.5	496	2016-03-01
91					2016-03-01
268	17	5.04	3.86	425	2016-03-01
232	20.7	5.44	4.08	528	2016-03-01
153	19.1	4.87	3.99	453	2016-03-01
109	14.9	5.51	4.04	430	2016-03-01
40					2016-03-01
61	22.4	5.17	3.99	414	2016-03-01
68	18.1	4.72	3.74	406	2016-03-01
286					2016-03-01
394					2016-03-01
52	16.6	5.97	4.34	510	2016-03-01
617	18	4.77	3.6	563	2016-03-01
460	21.1	3.75	3.57	499	2016-03-01
307	18.2	5.12	3.83	531	2016-03-01
99	14.2	4.86	3.96	462	2016-03-01
273	18	3.94	3.56	461	2016-03-01
295	14.8	4.78	4.11	489	2016-03-01
541					2016-03-01
22					2016-03-01
589	14.6	6.05	4.16	504	2016-03-01
159	16.4	4.78	4.36	377	2016-03-01
14					2016-03-01
519					2016-03-01
398					2016-03-01
258					2016-03-01
87					2016-03-01
214					2016-03-01
360					2016-03-01
405					2016-03-01
338					2016-03-01
235	13.8	4.54	3.75	397	2016-03-01
254	24.6	4.41	3.5	461	2016-03-01
432					2016-03-01
201					2016-03-01
143					2016-03-01
189	14.9	3.97	3.34	383	2016-03-01
15					2016-03-01
231					2016-03-01
283					2016-03-01
69					2016-03-01
348					2016-03-01
133					2016-03-01
164	12.2	4.03	3.94	363	2016-03-01
167					2016-03-01
111					2016-03-01
71					2016-03-01
402					2016-03-01
644					2016-03-01
10					2016-03-01
381					2016-03-01
101					2016-03-01
70					2016-03-01
431					2016-03-01
530					2016-03-01
324					2016-03-01
225					2016-03-01
27	21.1	5.74	4.12	511	2016-03-02
47	12	5.56	4.32	589	2016-03-02
125	21.8	5.57	4.14	590	2016-03-02
144	31.4	3.99	3.61	500	2016-03-02
253					2016-03-02
274	23.4	3.93	3.42	498	2016-03-02
192	15.8	7.64	4.59	617	2016-03-02
200	12.7	6.44	4.35	612	2016-03-02
361	20	5.97	4.34	551	2016-03-02
11	13.7	6.33	4.6	496	2016-03-02
466					2016-03-02
483	19.2	5.05	3.87	457	2016-03-02
632	17.4	5.51	4.26	557	2016-03-02
380	15.7	6.59	4.31	528	2016-03-02
8	20	3.75	4.01	574	2016-03-02
181	22.2	7.21	4.06	535	2016-03-02
24	28.3	5.51	4.09	598	2016-03-02
36	18.2	5.71	4.03	540	2016-03-02
37					2016-03-02
134	31.3	5.24	3.95	588	2016-03-02
209	25.3	5.83	3.82	551	2016-03-02
281	24.2	5.17	3.8	544	2016-03-02
269	14.7	5.94	4.26	506	2016-03-02
306	11.9	5.66	4.27	499	2016-03-02
54	20.1	5.66	4.18	482	2016-03-02
537	16.7	5.29	4.07	457	2016-03-02
113	17.1	5.23	3.62	373	2016-03-02
403					2016-03-02
188	20.4	4.64	4.13	538	2016-03-02
146	14.9	5.23	4.16	501	2016-03-02
384	14.9	6.7	4.43	534	2016-03-02
494	13.9	5.36	4.5	536	2016-03-02
183					2016-03-02
86	24.5	5.8	3.97	492	2016-03-02
543	19.8	5.74	4.09	557	2016-03-02
544	12.1	7.21	4.41	558	2016-03-02
547	18.1	6.44	3.98	489	2016-03-02
241	12	5.61	4.09	479	2016-03-02
410	17	6.03	3.83	539	2016-03-02
342	24.5	4.09	3.24	659	2016-03-02
173	25.8	4.55	3.65	514	2016-03-02
504	14	5.49	4.59	455	2016-03-02
179	11.6	6.06	4.25	483	2016-03-02
389	14.9	6.02	4.3	477	2016-03-02
2	24.6	5.78	4.11	476	2016-03-02
66	20.5	3.98	3.36	506	2016-03-02
119	18.8	5	3.99	444	2016-03-02
366	23.9	4.82	4.15	468	2016-03-02
369	16.8	4.69	3.99	472	2016-03-02
556	21.7	5.22	3.92	464	2016-03-02
291	17.7	6.01	4.22	542	2016-03-02
352					2016-03-02
292	14.8	6.54	4.25	477	2016-03-02
100	20.9	4.76	3.53	566	2016-03-02
490	12	7.11	4.36	588	2016-03-02
42	15.4	5.4	4.53	527	2016-03-02
406	21.1	5.36	3.94	531	2016-03-02
239	18.8	4.99	3.81	479	2016-03-02
103	14.7	6.34	4.54	481	2016-03-02
508					2016-03-02
195					2016-03-02
219					2016-03-02
267					2016-03-02
382					2016-03-02
477					2016-03-02
377					2016-03-02
216	15.4	5.25	4.35	441	2016-03-02
344	12	6.35	4.06	582	2016-03-02
74	13.8	6.06	4.13	547	2016-03-02
319					2016-03-02
90	24.1	4.91	3.86	595	2016-03-02
98	18.7	4.39	3.52	406	2016-03-02
236					2016-03-02
265	17.9	5.43	4	426	2016-03-02
193	13.3	5.01	4.02	460	2016-03-02
288					2016-03-02
233	16.4	5.73	4.1	504	2016-03-02
437					2016-03-02
385	15.7	6.44	4.58	611	2016-03-02
443	13.7	6.51	4.18	375	2016-03-02
299					2016-03-02
454	17.5	5.75	3.85	497	2016-03-02
553	19.3	4.5	3.49	495	2016-03-02
424					2016-03-02
643	26.1	4.58	3.58	433	2016-03-02
484	21.1	5.53	3.84	448	2016-03-02
89	20.6	4.61	3.94	509	2016-03-02
150	24.1	4.5	4.06	541	2016-03-02
645	21.8	5.75	3.88	458	2016-03-02
38	17.4	4.91	4.04	550	2016-03-02
457	28.6	4.69	3.76	476	2016-03-02
248	22.2	5.75	3.9	494	2016-03-02
170	20.3	6.12	4.36	569	2016-03-02
640	15.9	5.83	4.12	487	2016-03-02
60	23.2	5.47	3.57	499	2016-03-02
106	22.1	5.2	3.94	435	2016-03-02
379	18.2	5.17	4	570	2016-03-02
12	23.2	4.93	3.66	432	2016-03-02
451	17.7	4.44	3.62	450	2016-03-02
517	13.7	6.14	4.5	424	2016-03-02
636	23.6	4.66	3.96	465	2016-03-02
634	18.5	5.38	4.18	535	2016-03-02
631	11.3	5.91	4.38	457	2016-03-02
629	16.2	5.93	3.71	494	2016-03-02
627	28.4	4.7	3.63	500	2016-03-02
624	23.3	4.17	3.75	498	2016-03-02
622	15.7	7.43	4.47	580	2016-03-02
618	20.5	6.66	4.13	541	2016-03-02
579					2016-03-02
140					2016-03-02
523					2016-03-02
211					2016-03-02
375					2016-03-02
234					2016-03-02
359					2016-03-02
121					2016-03-02
392					2016-03-02
278					2016-03-02
346					2016-03-02
135	21	6.07	4.36	524	2016-03-02
132	19.6	4.3	3.72	480	2016-03-02
212	3.8	5.77	6.15		2016-03-02
535	23	4.63	3.62	483	2016-03-02
257					2016-03-02
453					2016-03-02
58					2016-03-02
323					2016-03-02
602					2016-03-02
485					2016-03-02
205					2016-03-02
114					2016-03-02
540					2016-03-02
411					2016-03-02
246					2016-03-02
528	10.8	7.13	4.4	507	2016-03-02
441					2016-03-02
63					2016-03-02
546					2016-03-02
287					2016-03-02
492					2016-03-02
45					2016-03-02
247					2016-03-02
336					2016-03-02
400					2016-03-02
435					2016-03-02
177	17	4.6	3.84	487	2016-03-02
616					2016-03-02
1					2016-03-02
393					2016-03-02
518					2016-03-02
251					2016-03-02
548					2016-03-02
447	24.2	5.64	3.89	580	2016-03-02
491					2016-03-02
158					2016-03-02
427					2016-03-02
418	14.8	5.62	4.39	523	2016-03-02
603	11.5	5.02	4.27	449	2016-03-02
604	11.9	5.31	4.4	441	2016-03-02
107					2016-03-02
396	11.7	6.05	4.15	524	2016-03-02
608					2016-03-02
92					2016-03-02
310					2016-03-02
356	13.1	4.47	4.01	469	2016-03-02
169					2016-03-02
470					2016-03-02
104					2016-03-02
426					2016-03-02
425					2016-03-02
480					2016-03-02
499					2016-03-02
433					2016-03-02
450	11.9	5.68	3.91	634	2016-03-02
6					2016-03-02
423					2016-03-02
335					2016-03-02
590					2016-03-02
407					2016-03-02
354					2016-03-02
118	21.6	5.18	3.66	580	2016-03-02
311	28.5	5.67	4.23	539	2016-03-02
421	17.6	5.61	3.94	602	2016-03-02
314	14	4.28	3.57	470	2016-03-02
245	12.7	6.33	4.13	718	2016-03-02
614	22.5	5.29	3.65	536	2016-03-02
95					2016-03-02
204	13.1	5.23	3.99	526	2016-03-02
78	21.3	4.02	3.69	556	2016-03-02
428	12.8	5.59	3.98	452	2016-03-02
414	12.8	4.4	4.06	380	2016-03-02
139	16.4	5.02	4.17	418	2016-03-02
178					2016-03-02
625	14	5.18	3.84	400	2016-03-02
598	16.4	4.05	3.71	375	2016-03-02
597	15.8	4.75	4.07	336	2016-03-02
208					2016-03-02
343					2016-03-02
64	14.1	4.85	3.96	376	2016-03-02
117	17.9	4.48	3.66	480	2016-03-02
180	16.6	5.51	3.95	440	2016-03-02
145	14.8	3.97	4.09	421	2016-03-02
633	15.2	4.55	3.84	509	2016-03-02
46	13	5.21	4.11	505	2016-03-02
277	15.4	5.27	4.22	376	2016-03-02
21					2016-03-02
264	15.2	5.18	4.08	403	2016-03-02
596	17.7	4.67	3.55	413	2016-03-02
175					2016-03-02
650	14.4	5.02	3.88	393	2016-03-02
142					2016-03-02
161	16.7	5.04	3.97	464	2016-03-02
194					2016-03-02
573					2016-03-02
599	12.8	4.66	3.96	412	2016-03-02
565	17.9	4.66	3.72	420	2016-03-02
82	13.7	6.15	4.14	436	2016-03-02
4	12	5.93	4.05	358	2016-03-02
476					2016-03-02
430					2016-03-02
498	11.6	6.49	4.42	455	2016-03-02
76	16.4	5.23	4.25	467	2016-03-02
84	13	5.98	4.07	445	2016-03-02
18					2016-03-02
532					2016-03-02
124					2016-03-02
32					2016-03-02
459					2016-03-02
355					2016-03-02
413	15.1	4.85	3.83	414	2016-03-02
545					2016-03-02
474					2016-03-02
404					2016-03-02
112	17.6	5.21	3.54	498	2016-03-02
91					2016-03-02
268	15.7	5.37	3.94	424	2016-03-02
232	19.6	5.4	4.14	521	2016-03-02
153	18.1	5.02	4.01	454	2016-03-02
109	15.3	5.44	4.05	427	2016-03-02
40					2016-03-02
61	20.6	5.22	4.03	424	2016-03-02
68	16.2	4.84	3.72	408	2016-03-02
286					2016-03-02
394					2016-03-02
52	16.6	6.03	4.35	516	2016-03-02
617	18.6	4.6	3.62	564	2016-03-02
460	20.4	3.85	3.57	495	2016-03-02
307	18.7	5.02	3.79	521	2016-03-02
99	14.2	4.95	3.96	467	2016-03-02
273	18.5	4.05	3.56	452	2016-03-02
295	13.9	4.67	4.12	451	2016-03-02
541					2016-03-02
22					2016-03-02
589	14.4	6.1	4.16	498	2016-03-02
159	15.4	4.68	4.35	377	2016-03-02
14					2016-03-02
519					2016-03-02
398					2016-03-02
258					2016-03-02
87					2016-03-02
214					2016-03-02
360					2016-03-02
405					2016-03-02
338					2016-03-02
235	14.1	4.49	3.74	391	2016-03-02
254	23.7	4.61	3.57	463	2016-03-02
432					2016-03-02
201					2016-03-02
143					2016-03-02
189	13.6	4.24	3.41	386	2016-03-02
15					2016-03-02
231					2016-03-02
283					2016-03-02
69					2016-03-02
348					2016-03-02
133					2016-03-02
164	11.3	4.46	3.87	367	2016-03-02
167					2016-03-02
111					2016-03-02
71					2016-03-02
402					2016-03-02
644					2016-03-02
10					2016-03-02
472					2016-03-02
35					2016-03-02
381					2016-03-02
101					2016-03-02
70					2016-03-02
431					2016-03-02
530					2016-03-02
324					2016-03-02
225					2016-03-02
27	20	5.82	4.13	503	2016-03-03
47	11.7	5.69	4.34	591	2016-03-03
125	21.2	5.57	4.12	574	2016-03-03
144	28.7	4.48	3.67	520	2016-03-03
253					2016-03-03
274	23.6	3.68	3.43	495	2016-03-03
192	15.2	7.68	4.63	588	2016-03-03
200	12	6.76	4.39	617	2016-03-03
361	22.8	6.16	4.36	564	2016-03-03
11	13.1	6.55	4.64	497	2016-03-03
466					2016-03-03
483	19.6	5.1	3.87	461	2016-03-03
632	18.6	5.75	4.25	566	2016-03-03
380	15.5	6.67	4.32	542	2016-03-03
8	19.2	3.71	4.05	569	2016-03-03
181	21.8	7.43	4.13	513	2016-03-03
24	30.1	5.46	4.13	589	2016-03-03
36	19.1	5.81	4.03	549	2016-03-03
37					2016-03-03
134	30.4	5.34	4.04	609	2016-03-03
209	24	5.91	3.87	567	2016-03-03
281	23.1	4.32	3.85	540	2016-03-03
269	15.3	5.97	4.23	519	2016-03-03
306	12.3	5.71	4.29	497	2016-03-03
54	18.4	5.64	4.19	478	2016-03-03
537	16.6	5.27	4.07	458	2016-03-03
113	17.5	5.2	3.59	374	2016-03-03
403					2016-03-03
188	21.6	4.91	4.13	538	2016-03-03
146	14.5	5.26	4.16	512	2016-03-03
384	12.4	7.06	4.55	523	2016-03-03
494	13.7	5.46	4.53	539	2016-03-03
183					2016-03-03
86	23.3	5.94	3.95	478	2016-03-03
543	19.1	5.8	4.17	558	2016-03-03
544	13.2	7.38	4.4	557	2016-03-03
547	18.2	6.48	4.03	485	2016-03-03
241	12	5.63	4.2	458	2016-03-03
410	17.1	6.32	3.83	537	2016-03-03
342	23.6	4.28	3.26	659	2016-03-03
173	27.5	4.59	3.66	513	2016-03-03
504	13.4	5.33	4.55	456	2016-03-03
179	12.3	5.82	4.24	481	2016-03-03
389	15	6.17	4.32	478	2016-03-03
2	24.5	5.51	4.1	475	2016-03-03
66	19.6	4.42	3.41	507	2016-03-03
119	18.8	5.07	3.99	438	2016-03-03
366	25.3	5.08	4.13	469	2016-03-03
369	16.5	4.45	4.02	480	2016-03-03
556	22.5	5.09	3.93	467	2016-03-03
291	17	6.03	4.19	542	2016-03-03
352					2016-03-03
292	14.8	6.45	4.26	483	2016-03-03
100	20.7	4.76	3.6	561	2016-03-03
490	11.5	7.15	4.39	581	2016-03-03
42	15.3	5.58	4.54	535	2016-03-03
406	21.6	5.4	3.98	532	2016-03-03
239	18.1	4.78	3.85	466	2016-03-03
103	15	6.33	4.53	490	2016-03-03
508					2016-03-03
195					2016-03-03
219					2016-03-03
267					2016-03-03
382					2016-03-03
477					2016-03-03
377					2016-03-03
216	15.8	5.38	4.39	453	2016-03-03
344	11.4	6.35	4.09	588	2016-03-03
74	14.1	6.2	4.12	550	2016-03-03
319					2016-03-03
90	23.7	4.85	3.91	573	2016-03-03
98	18.9	4.35	3.54	409	2016-03-03
236					2016-03-03
265	18.3	5.47	4.01	441	2016-03-03
193	13.3	4.98	4.01	438	2016-03-03
288					2016-03-03
233	15.8	5.42	4.23	511	2016-03-03
437					2016-03-03
385	15.2	6.4	4.59	606	2016-03-03
443	16	6.65	4.2	388	2016-03-03
299					2016-03-03
454	17.7	6	3.92	487	2016-03-03
553	18.8	4.38	3.53	492	2016-03-03
424					2016-03-03
643	25.3	4.82	3.56	428	2016-03-03
484	20.1	5.38	3.93	449	2016-03-03
89	20.9	5.12	3.87	518	2016-03-03
150	24.3	4.66	4.08	542	2016-03-03
645	21.9	5.25	3.9	456	2016-03-03
38	16.9	4.93	4.05	534	2016-03-03
457	30.1	4.68	3.72	479	2016-03-03
248	22.3	5.25	3.9	508	2016-03-03
170	19.7	6.31	4.36	573	2016-03-03
640	17.6	6.07	3.77	490	2016-03-03
60	21.6	5.39	3.64	508	2016-03-03
106	22.9	5.29	3.99	439	2016-03-03
379	17.6	5.41	4	574	2016-03-03
12	20.6	4.51	3.75	422	2016-03-03
451	18.5	4.24	3.55	448	2016-03-03
517	13.8	6.32	4.51	421	2016-03-03
636	21.9	4.77	4.01	469	2016-03-03
634	18.1	5.14	4.21	541	2016-03-03
631	12.9	5.83	4.36	456	2016-03-03
629	17.2	6.72	3.76	499	2016-03-03
627	28.6	4.76	3.56	492	2016-03-03
624	21.9	4.47	3.82	498	2016-03-03
622	15.9	7.54	4.51	595	2016-03-03
618	17.7	6.53	4.16	529	2016-03-03
579					2016-03-03
140					2016-03-03
523					2016-03-03
211					2016-03-03
375					2016-03-03
234					2016-03-03
359					2016-03-03
121					2016-03-03
392					2016-03-03
278					2016-03-03
346					2016-03-03
135	21	6.08	4.2	525	2016-03-03
132	19.1	4.49	3.62	482	2016-03-03
212	20.7	4.57	5.9	479	2016-03-03
535	24.1	4.71	3.65	478	2016-03-03
257					2016-03-03
453					2016-03-03
58					2016-03-03
323					2016-03-03
602					2016-03-03
485					2016-03-03
205					2016-03-03
114					2016-03-03
540					2016-03-03
411					2016-03-03
246					2016-03-03
528	10.7	7.02	4.39	508	2016-03-03
441					2016-03-03
63					2016-03-03
546					2016-03-03
287					2016-03-03
492					2016-03-03
45					2016-03-03
247					2016-03-03
336					2016-03-03
400					2016-03-03
435					2016-03-03
177	17.4	4.61	3.86	490	2016-03-03
616					2016-03-03
1					2016-03-03
393					2016-03-03
518					2016-03-03
251					2016-03-03
548					2016-03-03
447	24.2	5.69	3.9	575	2016-03-03
491					2016-03-03
158					2016-03-03
427					2016-03-03
418	14.7	5.65	4.41	517	2016-03-03
603	11.3	5.12	4.28	445	2016-03-03
604	11.5	5.31	4.38	451	2016-03-03
107					2016-03-03
396	11.5	6.03	4.11	512	2016-03-03
608					2016-03-03
92					2016-03-03
310					2016-03-03
356	13.3	4.46	4.03	474	2016-03-03
169					2016-03-03
470					2016-03-03
104					2016-03-03
426					2016-03-03
425					2016-03-03
480					2016-03-03
499					2016-03-03
433					2016-03-03
450	12.4	5.51	3.91	650	2016-03-03
6					2016-03-03
423					2016-03-03
335					2016-03-03
590					2016-03-03
407					2016-03-03
354					2016-03-03
118	20.6	5.56	3.68	578	2016-03-03
311	29	5.49	4.24	537	2016-03-03
421	17.7	5.59	3.95	611	2016-03-03
314	14.1	4.12	3.59	472	2016-03-03
245	13.4	6.27	4.06	726	2016-03-03
614	24.1	5.07	3.6	539	2016-03-03
95					2016-03-03
204	13	5.13	4.02	521	2016-03-03
78	21.2	4.09	3.7	559	2016-03-03
428	13.5	5.64	4.02	461	2016-03-03
414	13.1	4.53	4.03	380	2016-03-03
139	16.7	5.11	4.21	419	2016-03-03
178					2016-03-03
625	14.2	5.2	3.86	393	2016-03-03
598	16.9	4	3.7	391	2016-03-03
597	14.6	4.69	4.1	342	2016-03-03
208					2016-03-03
343					2016-03-03
64	14.3	4.68	3.99	379	2016-03-03
117	17.9	4.61	3.67	480	2016-03-03
180	15.1	5.44	4.02	455	2016-03-03
145	14.4	3.98	4.1	405	2016-03-03
633	13.5	4.65	3.84	513	2016-03-03
46	12.7	5.03	4.12	506	2016-03-03
277	15	5.13	4.23	369	2016-03-03
21					2016-03-03
264	15.7	5.33	4.09	390	2016-03-03
596	17.1	4.75	3.59	424	2016-03-03
175					2016-03-03
650	13.7	5.3	3.83	414	2016-03-03
142					2016-03-03
161	15.2	5.13	4.02	464	2016-03-03
194					2016-03-03
573					2016-03-03
599	12.4	4.83	4	417	2016-03-03
565	17.5	4.64	3.71	432	2016-03-03
82	12.9	5.95	4.18	436	2016-03-03
4	12.5	5.89	4.09	415	2016-03-03
476					2016-03-03
430					2016-03-03
498	13.1	6.23	4.41	479	2016-03-03
76	16.7	5.54	4.26	464	2016-03-03
84	12.8	5.71	4.02	448	2016-03-03
18					2016-03-03
532					2016-03-03
124					2016-03-03
32					2016-03-03
459					2016-03-03
355					2016-03-03
413	15.7	4.73	3.83	426	2016-03-03
545					2016-03-03
474					2016-03-03
404					2016-03-03
112	16.6	5.32	3.57	508	2016-03-03
91					2016-03-03
268	16.3	5.41	3.98	423	2016-03-03
232	16.9	5.21	4.14	519	2016-03-03
153	18.8	5.01	4.04	456	2016-03-03
109	14.5	5.81	4.09	432	2016-03-03
40					2016-03-03
61	19.3	5.4	4.02	435	2016-03-03
68	16	4.9	3.69	405	2016-03-03
286					2016-03-03
394					2016-03-03
52	16.6	5.73	4.39	519	2016-03-03
617	18.4	4.5	3.64	556	2016-03-03
460	21.7	3.9	3.53	493	2016-03-03
307	19.4	4.86	3.76	527	2016-03-03
99	14.9	5.06	3.94	461	2016-03-03
273	17.8	4.01	3.58	470	2016-03-03
295	14.1	4.7	4.13	447	2016-03-03
541					2016-03-03
22					2016-03-03
589	15.4	6.3	4.22	509	2016-03-03
159	16.3	4.99	4.37	380	2016-03-03
14					2016-03-03
519					2016-03-03
398					2016-03-03
258					2016-03-03
87					2016-03-03
214					2016-03-03
360					2016-03-03
405					2016-03-03
338					2016-03-03
235	14.8	4.45	3.76	401	2016-03-03
254	22.9	4.6	3.61	466	2016-03-03
432					2016-03-03
201					2016-03-03
143					2016-03-03
189	15.2	4.15	3.49	388	2016-03-03
15					2016-03-03
231					2016-03-03
283					2016-03-03
69					2016-03-03
348					2016-03-03
133					2016-03-03
164	13.8	4.53	3.81	359	2016-03-03
167					2016-03-03
111					2016-03-03
71					2016-03-03
402					2016-03-03
644					2016-03-03
10					2016-03-03
472					2016-03-03
35					2016-03-03
381					2016-03-03
101					2016-03-03
70					2016-03-03
431					2016-03-03
530					2016-03-03
324					2016-03-03
225					2016-03-03
27	20.9	5.69	4.12	501	2016-03-04
47	11.7	5.55	4.37	624	2016-03-04
125	18.4	5.77	4.17	590	2016-03-04
144	29.3	4.4	3.75	506	2016-03-04
253					2016-03-04
274	23.8	3.95	3.55	492	2016-03-04
192	15.4	7.58	4.63	586	2016-03-04
200	11.9	6.33	4.21	604	2016-03-04
361	23.3	6.12	4.36	547	2016-03-04
11	13.6	6.78	4.68	493	2016-03-04
466					2016-03-04
483	20.4	5.26	3.87	465	2016-03-04
632	18.5	5.86	4.26	560	2016-03-04
380	15.3	6.77	4.35	535	2016-03-04
8	19.1	4.02	4.05	553	2016-03-04
181	22.1	7.29	4.14	503	2016-03-04
24	29.4	5.46	4.21	607	2016-03-04
36	19.3	5.93	4.06	542	2016-03-04
37					2016-03-04
134	30.3	5.11	4.03	606	2016-03-04
209	26	5.87	3.89	569	2016-03-04
281	25.6	4.17	3.86	541	2016-03-04
269	15.3	5.91	4.2	516	2016-03-04
306	12.3	5.71	4.29	500	2016-03-04
54	19.8	5.86	4.21	496	2016-03-04
537	17.3	5.45	4.1	464	2016-03-04
113	17.8	5.11	3.59	452	2016-03-04
403					2016-03-04
188	19.7	5.12	4.18	522	2016-03-04
146	14.5	5.62	4.22	572	2016-03-04
384	13	7.01	4.49	532	2016-03-04
494	13.2	5.41	4.54	546	2016-03-04
183					2016-03-04
86	25.5	6.33	3.94	493	2016-03-04
543	19.1	5.91	4.19	546	2016-03-04
544	13.2	7.39	4.45	553	2016-03-04
547	18	6.29	4.06	485	2016-03-04
241	11.9	5.85	4.35	486	2016-03-04
410	17.9	6.17	3.88	532	2016-03-04
342	23.2	4.5	3.28	701	2016-03-04
173	27.5	4.53	3.75	512	2016-03-04
504	14.1	5.4	4.57	452	2016-03-04
179	12.3	5.68	4.26	480	2016-03-04
389	14.5	6.23	4.34	493	2016-03-04
2	24.5	5.37	4.11	485	2016-03-04
66	19.7	4.22	3.37	511	2016-03-04
119	18.1	5.21	4.04	440	2016-03-04
366	25	5.12	4.16	468	2016-03-04
369	16.5	4.3	4.07	477	2016-03-04
556	21.6	4.86	4.01	468	2016-03-04
291	17.8	6.17	4.23	547	2016-03-04
352					2016-03-04
292	15	6.44	4.27	497	2016-03-04
100	19.3	4.55	3.63	580	2016-03-04
490	10.8	7.88	4.47	584	2016-03-04
42	14.8	5.51	4.55	529	2016-03-04
406	21.7	5.54	3.99	530	2016-03-04
239	17.3	4.65	3.94	476	2016-03-04
103	15.9	6.31	4.53	482	2016-03-04
508					2016-03-04
195					2016-03-04
219					2016-03-04
267					2016-03-04
382					2016-03-04
477					2016-03-04
377					2016-03-04
216	16	5.64	4.37	445	2016-03-04
344	11.9	6.44	4.12	579	2016-03-04
74	13.9	6.28	4.12	573	2016-03-04
319					2016-03-04
90	23.7	4.3	3.9	585	2016-03-04
98	18.3	4.65	3.61	408	2016-03-04
236					2016-03-04
265	19.1	5.32	4.01	428	2016-03-04
193	14.1	4.97	4.03	460	2016-03-04
288					2016-03-04
233	16.5	5.28	4.26	514	2016-03-04
437					2016-03-04
385	15.2	6.42	4.6	615	2016-03-04
443	17.6	6.05	4.11	401	2016-03-04
299					2016-03-04
454	18.2	5.88	3.91	482	2016-03-04
553	19.2	4.38	3.58	496	2016-03-04
424					2016-03-04
643	25.4	4.48	3.57	431	2016-03-04
484	21	5.41	3.92	454	2016-03-04
89	20.2	4.89	3.88	503	2016-03-04
150	24.6	4.51	4.09	540	2016-03-04
645	21.8	4.97	3.94	456	2016-03-04
38	17	5.04	4.1	539	2016-03-04
457	29	4.5	3.75	485	2016-03-04
248	23	5.19	3.98	506	2016-03-04
170	19.7	6.15	4.36	568	2016-03-04
640	17.5	5.71	3.93	579	2016-03-04
60	22	5.33	3.66	496	2016-03-04
106	22.9	5.3	4.05	438	2016-03-04
379	17.2	5.52	4.02	575	2016-03-04
12	22.8	4.64	3.83	417	2016-03-04
451	18.8	4.35	3.58	455	2016-03-04
517	14	6.24	4.49	433	2016-03-04
636	22.4	4.65	4.01	471	2016-03-04
634	18.7	5.22	4.21	542	2016-03-04
631	11.7	6.15	4.38	464	2016-03-04
629	16.4	6.63	3.77	499	2016-03-04
627	28.9	5.14	3.51	502	2016-03-04
624	22.4	4.42	3.82	506	2016-03-04
622	17.2	6.87	4.51	590	2016-03-04
618	18.3	6.23	4.14	534	2016-03-04
579					2016-03-04
140					2016-03-04
523					2016-03-04
211					2016-03-04
375					2016-03-04
234					2016-03-04
359					2016-03-04
121					2016-03-04
392					2016-03-04
278					2016-03-04
346					2016-03-04
135	21.5	6.07	4.17	528	2016-03-04
132	19.6	4.46	3.65	483	2016-03-04
212	18.6	4.56	5.68	475	2016-03-04
535	25.1	5.08	3.66	481	2016-03-04
257					2016-03-04
453					2016-03-04
58					2016-03-04
323					2016-03-04
602					2016-03-04
485					2016-03-04
205					2016-03-04
114					2016-03-04
540					2016-03-04
411					2016-03-04
246					2016-03-04
528	10.2	6.81	4.39	505	2016-03-04
441					2016-03-04
63					2016-03-04
546					2016-03-04
287					2016-03-04
492					2016-03-04
45					2016-03-04
247					2016-03-04
336					2016-03-04
400					2016-03-04
435					2016-03-04
177	16.9	4.58	3.89	499	2016-03-04
616					2016-03-04
1					2016-03-04
393					2016-03-04
518					2016-03-04
251					2016-03-04
548					2016-03-04
447	23.2	5.61	3.94	595	2016-03-04
491					2016-03-04
158					2016-03-04
427					2016-03-04
418	14.6	5.88	4.42	517	2016-03-04
603	11	5.41	4.3	455	2016-03-04
604	11.8	5.37	4.39	440	2016-03-04
107					2016-03-04
396	11.4	6.05	4.12	535	2016-03-04
608					2016-03-04
92					2016-03-04
310					2016-03-04
356	13.1	4.47	4.08	474	2016-03-04
169					2016-03-04
470					2016-03-04
104					2016-03-04
426					2016-03-04
425					2016-03-04
480					2016-03-04
499					2016-03-04
433					2016-03-04
450	10.1	5.49	3.96	713	2016-03-04
6					2016-03-04
423					2016-03-04
335					2016-03-04
590					2016-03-04
407					2016-03-04
354					2016-03-04
118	19.9	5.22	3.72	574	2016-03-04
311	29	5.48	4.26	541	2016-03-04
421	17.6	5.7	4	617	2016-03-04
314	13.7	4.23	3.6	466	2016-03-04
245	13.1	6.19	4.07	656	2016-03-04
614	25.7	5.27	3.69	541	2016-03-04
95					2016-03-04
204	13.1	5.22	4.04	537	2016-03-04
78	22.3	4.19	3.72	549	2016-03-04
428	13.5	5.57	4.03	472	2016-03-04
414	13	4.72	4.04	379	2016-03-04
139	16.7	5.09	4.21	422	2016-03-04
178					2016-03-04
625	13.8	5.23	3.92	398	2016-03-04
598	16.8	4.03	3.74	372	2016-03-04
597	13.2	4.67	4.13	337	2016-03-04
208					2016-03-04
343					2016-03-04
64	14.6	4.71	4.01	376	2016-03-04
117	17.9	4.63	3.65	480	2016-03-04
180	14.2	5.32	4.08	468	2016-03-04
145	15	3.8	4.08	420	2016-03-04
633	14.3	4.47	3.83	523	2016-03-04
46	13.3	5.03	4.13	508	2016-03-04
277	15.1	5.19	4.24	371	2016-03-04
21					2016-03-04
264	15.7	5.31	4.12	417	2016-03-04
596	17.7	4.69	3.59	437	2016-03-04
175					2016-03-04
650	15.7	5.48	3.69	422	2016-03-04
142					2016-03-04
161	16	5.02	3.96	497	2016-03-04
194					2016-03-04
573					2016-03-04
599	13	4.8	4	415	2016-03-04
565	17.7	4.73	3.75	424	2016-03-04
82	13.5	5.6	4.18	437	2016-03-04
4	13.1	5.85	4.05	368	2016-03-04
476					2016-03-04
430					2016-03-04
498	13.4	6.6	4.42	464	2016-03-04
76	16.5	6	4.28	447	2016-03-04
84	13.5	5.86	4.04	444	2016-03-04
18					2016-03-04
532					2016-03-04
124					2016-03-04
32					2016-03-04
459					2016-03-04
355					2016-03-04
413	15.9	4.73	3.86	423	2016-03-04
545					2016-03-04
474					2016-03-04
404					2016-03-04
112	18.3	5.44	3.58	495	2016-03-04
91					2016-03-04
268	17.1	5.13	3.97	413	2016-03-04
232	16.5	5.07	4.17	537	2016-03-04
153	19.3	4.96	4.01	459	2016-03-04
109	14.3	6.02	4.09	410	2016-03-04
40					2016-03-04
61	18.8	4.92	4	438	2016-03-04
68	17.5	4.72	3.61	403	2016-03-04
286					2016-03-04
394					2016-03-04
52	16.4	5.57	4.41	506	2016-03-04
617	18.5	4.57	3.72	551	2016-03-04
460	21.8	3.86	3.5	516	2016-03-04
307	18.7	4.84	3.78	519	2016-03-04
99	14.3	5.09	3.95	484	2016-03-04
273	17.6	3.92	3.64	472	2016-03-04
295	14.5	4.72	4.13	442	2016-03-04
541					2016-03-04
22					2016-03-04
589	16.1	6.28	4.24	503	2016-03-04
159	15.7	4.82	4.39	378	2016-03-04
14					2016-03-04
519					2016-03-04
398					2016-03-04
258					2016-03-04
87					2016-03-04
214					2016-03-04
360					2016-03-04
405					2016-03-04
338					2016-03-04
235	14.9	4.82	3.85	406	2016-03-04
254	23.3	4.49	3.61	482	2016-03-04
432					2016-03-04
201					2016-03-04
143					2016-03-04
189	15	4.16	3.57	390	2016-03-04
15					2016-03-04
231					2016-03-04
283					2016-03-04
69					2016-03-04
348					2016-03-04
133					2016-03-04
164	14.3	4.57	3.79	444	2016-03-04
167					2016-03-04
111					2016-03-04
71					2016-03-04
402					2016-03-04
644					2016-03-04
10					2016-03-04
472					2016-03-04
35					2016-03-04
65					2016-03-04
381					2016-03-04
101					2016-03-04
70					2016-03-04
431					2016-03-04
530					2016-03-04
324					2016-03-04
225					2016-03-04
27	20.2	5.59	4.1	510	2016-03-05
47	12	5.63	4.39	593	2016-03-05
125	20.4	6.3	4.17	582	2016-03-05
144	29.6	4.44	3.87	510	2016-03-05
253					2016-03-05
274	23.7	3.89	3.51	494	2016-03-05
192	15.6	7.65	4.62	594	2016-03-05
200	11.5	6.35	4.21	596	2016-03-05
361	24.3	6.73	4.43	557	2016-03-05
11	12.6	6.8	4.67	495	2016-03-05
466					2016-03-05
483	19.8	5.31	3.91	464	2016-03-05
632	19.1	5.79	4.3	563	2016-03-05
380	15.9	6.85	4.35	546	2016-03-05
8	19.7	4.13	4.05	570	2016-03-05
181	21.9	7.41	4.09	509	2016-03-05
24	28.1	5.49	4.21	615	2016-03-05
36	19.4	5.7	4.09	538	2016-03-05
37					2016-03-05
134	29.9	5.16	4.06	621	2016-03-05
209	24.6	5.86	3.95	567	2016-03-05
281	25.8	5.25	3.87	540	2016-03-05
269	15.8	5.81	4.21	525	2016-03-05
306	11.6	5.57	4.29	500	2016-03-05
54	18.4	5.58	4.25	474	2016-03-05
537	17.1	5.56	4.1	467	2016-03-05
113	18.5	4.87	3.66	383	2016-03-05
403					2016-03-05
188	19.8	5.16	4.16	536	2016-03-05
146	14.4	5.65	4.22	503	2016-03-05
384	13.3	6.72	4.35	536	2016-03-05
494	13.7	5.55	4.51	563	2016-03-05
183					2016-03-05
86	24.9	6.19	3.99	490	2016-03-05
543	19.1	5.94	4.16	553	2016-03-05
544	12.9	7.38	4.49	608	2016-03-05
547	18.2	6.4	4.09	490	2016-03-05
241	11.6	5.75	4.35	475	2016-03-05
410	17.8	5.91	3.95	536	2016-03-05
342	22.3	4.69	3.32	661	2016-03-05
173	26.9	4.29	3.81	519	2016-03-05
504	13.8	5.63	4.57	454	2016-03-05
179	11.2	5.81	4.32	469	2016-03-05
389	13.9	6.32	4.32	491	2016-03-05
2	24.1	5.48	4.14	483	2016-03-05
66	19.3	4.14	3.38	506	2016-03-05
119	18.8	5.38	4.08	442	2016-03-05
366	25.2	4.88	4.21	477	2016-03-05
369	16.6	4.66	4.1	473	2016-03-05
556	22.4	4.98	4.02	469	2016-03-05
291	16.7	6.5	4.29	547	2016-03-05
352					2016-03-05
292	14.8	6.32	4.26	486	2016-03-05
100	21.4	4.46	3.61	573	2016-03-05
490	12.1	7.73	4.4	579	2016-03-05
42	14.5	5.55	4.56	528	2016-03-05
406	22.2	5.6	3.94	532	2016-03-05
239	17.4	4.68	3.9	471	2016-03-05
103	15.3	6.24	4.52	469	2016-03-05
508					2016-03-05
195					2016-03-05
219					2016-03-05
267					2016-03-05
382					2016-03-05
477					2016-03-05
377					2016-03-05
216	16.1	5.71	4.38	453	2016-03-05
344	11.5	6.35	4.09	587	2016-03-05
74	13.8	6.03	4.16	567	2016-03-05
319					2016-03-05
90	24.8	4.5	3.9	599	2016-03-05
98	18.1	4.68	3.61	418	2016-03-05
236					2016-03-05
265	19.3	5.23	4.08	476	2016-03-05
193	13.5	4.97	4.07	461	2016-03-05
288					2016-03-05
233	15.5	5.4	4.27	511	2016-03-05
437					2016-03-05
385	15.8	6.53	4.61	618	2016-03-05
443	17.4	5.91	4.17	396	2016-03-05
299					2016-03-05
454	19.6	5.67	3.89	489	2016-03-05
553	18.9	4.53	3.58	488	2016-03-05
424					2016-03-05
643	25.3	4.57	3.61	428	2016-03-05
484	20.7	5.38	3.94	452	2016-03-05
89	21.3	4.78	3.89	508	2016-03-05
150	25.1	4.61	4.09	545	2016-03-05
645	22.6	5.31	3.95	464	2016-03-05
38	16.4	5.21	4.1	542	2016-03-05
457	30.4	4.65	3.77	484	2016-03-05
248	24.4	5.07	4.02	503	2016-03-05
170	19.9	6.27	4.36	570	2016-03-05
640	17.8	5.51	4.07	491	2016-03-05
60	22.6	5.59	3.68	509	2016-03-05
106	22.4	5.31	4.08	426	2016-03-05
379	17.6	5.73	4.03	582	2016-03-05
12	22.8	4.93	3.82	432	2016-03-05
451	19	4.06	3.59	462	2016-03-05
517	13.5	6.21	4.47	429	2016-03-05
636	23.3	4.95	3.97	480	2016-03-05
634	18.3	5.2	4.16	540	2016-03-05
631	12.1	6.26	4.38	464	2016-03-05
629	17	6.51	3.79	506	2016-03-05
627	28.7	5.04	3.53	506	2016-03-05
624	23.3	4.47	3.81	499	2016-03-05
622	15.8	6.54	4.55	593	2016-03-05
618	19.1	5.9	4.18	537	2016-03-05
579					2016-03-05
140					2016-03-05
523					2016-03-05
211					2016-03-05
375					2016-03-05
234					2016-03-05
359					2016-03-05
121					2016-03-05
392					2016-03-05
278					2016-03-05
346					2016-03-05
135	21.8	5.75	4.24	533	2016-03-05
132	19.3	4.38	3.72	500	2016-03-05
212	18.7	6.45	5.33	473	2016-03-05
535	23.7	4.42	3.76	465	2016-03-05
257					2016-03-05
453					2016-03-05
58					2016-03-05
323					2016-03-05
602					2016-03-05
485					2016-03-05
205					2016-03-05
114					2016-03-05
540					2016-03-05
411					2016-03-05
246					2016-03-05
528	10.8	6.98	4.4	502	2016-03-05
441					2016-03-05
63					2016-03-05
546					2016-03-05
287					2016-03-05
492					2016-03-05
45					2016-03-05
247					2016-03-05
336					2016-03-05
400					2016-03-05
435					2016-03-05
177	16.8	4.68	3.89	500	2016-03-05
616					2016-03-05
1					2016-03-05
393					2016-03-05
518					2016-03-05
251					2016-03-05
548					2016-03-05
447	24.4	5.91	3.97	588	2016-03-05
491					2016-03-05
158					2016-03-05
427					2016-03-05
418	14.9	5.98	4.43	524	2016-03-05
603	11.3	5.37	4.22	453	2016-03-05
604	11.7	5.44	4.4	453	2016-03-05
107					2016-03-05
396	11.8	6.27	4.19	531	2016-03-05
608					2016-03-05
92					2016-03-05
310					2016-03-05
356	12.9	4.83	4.09	476	2016-03-05
169					2016-03-05
470					2016-03-05
104					2016-03-05
426					2016-03-05
425					2016-03-05
480					2016-03-05
499					2016-03-05
433					2016-03-05
450	11.6	5.83	4	641	2016-03-05
6					2016-03-05
423					2016-03-05
335					2016-03-05
590					2016-03-05
407					2016-03-05
354					2016-03-05
118	20.4	5.42	3.74	573	2016-03-05
311	29.6	5.72	4.27	547	2016-03-05
421	17.1	5.86	4.04	618	2016-03-05
314	14.4	4.19	3.61	478	2016-03-05
245	12.8	6.5	4.18	733	2016-03-05
614	24.7	5.22	3.7	532	2016-03-05
95					2016-03-05
204	13	5.67	4.09	586	2016-03-05
78	21.8	4.13	3.72	546	2016-03-05
428	13.5	5.81	4.12	454	2016-03-05
414	13	4.79	4.04	384	2016-03-05
139	16.8	5.28	4.2	414	2016-03-05
178					2016-03-05
625	14.1	5.36	3.95	459	2016-03-05
598	15.5	4.16	3.79	371	2016-03-05
597	12.8	4.96	4.13	333	2016-03-05
208					2016-03-05
343					2016-03-05
64	14.4	5.01	4.03	375	2016-03-05
117	17.7	4.66	3.63	472	2016-03-05
180	14.7	5.19	4.18	447	2016-03-05
145	14.6	3.8	4.12	416	2016-03-05
633	13.9	4.56	3.86	506	2016-03-05
46	13.2	5.08	4.14	497	2016-03-05
277	15	5.19	4.21	383	2016-03-05
21					2016-03-05
264	16.2	5.44	4.17	397	2016-03-05
596	17.1	4.7	3.6	424	2016-03-05
175					2016-03-05
650	16.2	5.38	3.7	423	2016-03-05
142					2016-03-05
161	16.5	5.26	3.95	483	2016-03-05
194					2016-03-05
573					2016-03-05
599	13.1	5.07	4.02	410	2016-03-05
565	18.6	4.9	3.79	429	2016-03-05
82	13.9	5.56	4.23	435	2016-03-05
4	12.3	5.98	4.03	370	2016-03-05
476					2016-03-05
430					2016-03-05
498	13.5	6.38	4.45	456	2016-03-05
76	17.5	5.76	4.26	459	2016-03-05
84	13.1	5.94	4.06	448	2016-03-05
18					2016-03-05
532					2016-03-05
124					2016-03-05
32					2016-03-05
459					2016-03-05
355					2016-03-05
413	15.9	4.72	3.86	423	2016-03-05
545					2016-03-05
474					2016-03-05
404					2016-03-05
112	18.2	5.51	3.54	488	2016-03-05
91					2016-03-05
268	17.7	5.24	3.97	423	2016-03-05
232	19.8	5.34	4.21	516	2016-03-05
153	18.6	5.2	4.04	425	2016-03-05
109	15.3	6.23	4.09	426	2016-03-05
40					2016-03-05
61	19	5.02	3.96	446	2016-03-05
68	18.1	4.66	3.62	403	2016-03-05
286					2016-03-05
394					2016-03-05
52	16.5	5.73	4.41	503	2016-03-05
617	18.4	4.67	3.76	551	2016-03-05
460	21.9	3.88	3.56	513	2016-03-05
307	19.1	4.88	3.77	534	2016-03-05
99	13.8	5.12	3.95	520	2016-03-05
273	18	4.22	3.69	465	2016-03-05
295	13.8	4.46	4.14	442	2016-03-05
541					2016-03-05
22					2016-03-05
589	15.6	6.3	4.26	492	2016-03-05
159	14.3	4.74	4.41	387	2016-03-05
14					2016-03-05
519					2016-03-05
398					2016-03-05
258					2016-03-05
87					2016-03-05
214					2016-03-05
360					2016-03-05
405					2016-03-05
338					2016-03-05
235	14.4	4.91	3.84	410	2016-03-05
254	23.2	4.41	3.64	464	2016-03-05
432					2016-03-05
201					2016-03-05
143					2016-03-05
189	15.5	4.2	3.64	390	2016-03-05
15					2016-03-05
231					2016-03-05
283					2016-03-05
69					2016-03-05
348					2016-03-05
133					2016-03-05
164	15.4	4.28	3.84	364	2016-03-05
167					2016-03-05
111					2016-03-05
71					2016-03-05
402					2016-03-05
644					2016-03-05
10					2016-03-05
472					2016-03-05
35					2016-03-05
65					2016-03-05
381					2016-03-05
101					2016-03-05
70					2016-03-05
431					2016-03-05
530					2016-03-05
324					2016-03-05
225					2016-03-05
27	20.4	5.7	4.09	490	2016-03-06
47	12.3	5.57	4.39	586	2016-03-06
125	20.8	6.19	4.15	576	2016-03-06
144	28.2	4.95	3.9	512	2016-03-06
253					2016-03-06
274	23.4	3.85	3.62	500	2016-03-06
192	14.8	7.73	4.61	583	2016-03-06
200	11.3	6.27	4.18	609	2016-03-06
361	24.3	5.74	4.52	553	2016-03-06
11	13.3	6.83	4.63	493	2016-03-06
466					2016-03-06
483	21	5.4	3.97	469	2016-03-06
632	18.6	5.75	4.33	597	2016-03-06
380	15.6	6.84	4.33	537	2016-03-06
8	18.9	4.33	4.03	560	2016-03-06
181	19.8	6.93	4.06	480	2016-03-06
24	28.3	5.31	4.18	615	2016-03-06
36	19.1	5.8	4.07	547	2016-03-06
37					2016-03-06
134	30.5	5.15	4.08	601	2016-03-06
209	25	5.87	3.96	565	2016-03-06
281	22.1	5.33	3.87	515	2016-03-06
269	14.6	5.88	4.22	516	2016-03-06
306	12	5.59	4.28	501	2016-03-06
54	19.7	5.46	4.29	475	2016-03-06
537	16.3	5.46	4.08	439	2016-03-06
113	17.7	4.96	3.7	369	2016-03-06
403					2016-03-06
188	20.7	5.17	4.15	538	2016-03-06
146	14.4	5.51	4.2	500	2016-03-06
384	14.4	6.74	4.3	541	2016-03-06
494	13.9	5.5	4.5	542	2016-03-06
183					2016-03-06
86	25.3	6.22	4.04	491	2016-03-06
543	20.5	6.02	4.17	539	2016-03-06
544	12.7	7.26	4.51	547	2016-03-06
547	18.5	6.59	4.09	481	2016-03-06
241	11.9	5.86	4.32	485	2016-03-06
410	17.6	5.99	3.95	530	2016-03-06
342	24.3	4.4	3.3	667	2016-03-06
173	27.4	4.38	3.81	519	2016-03-06
504	13.7	5.72	4.59	447	2016-03-06
179	11.7	5.87	4.35	476	2016-03-06
389	15	6.56	4.33	491	2016-03-06
2	25.6	5.11	4.1	488	2016-03-06
66	18.5	4.28	3.43	516	2016-03-06
119	19	5.18	4.05	452	2016-03-06
366	25.8	4.91	4.18	480	2016-03-06
369	17.5	4.63	4.08	476	2016-03-06
556	22.2	5.11	4.03	473	2016-03-06
291	17.2	6.48	4.31	540	2016-03-06
352					2016-03-06
292	14.1	6.2	4.22	482	2016-03-06
100	21.9	4.35	3.57	561	2016-03-06
490	13.5	7.56	4.36	586	2016-03-06
42	15	5.53	4.49	528	2016-03-06
406	21.6	5.43	3.94	530	2016-03-06
239	19	4.71	3.86	453	2016-03-06
103	16	6.02	4.55	478	2016-03-06
508					2016-03-06
195					2016-03-06
219					2016-03-06
267					2016-03-06
382					2016-03-06
477					2016-03-06
377					2016-03-06
216	16.3	5.39	4.4	451	2016-03-06
344	11.7	6.29	4.05	585	2016-03-06
74	13.8	6.09	4.17	558	2016-03-06
319					2016-03-06
90	26.5	4.9	3.86	590	2016-03-06
98	18.9	4.94	3.65	410	2016-03-06
236					2016-03-06
265	19.4	5.3	4.13	438	2016-03-06
193	13.6	5.11	4.11	455	2016-03-06
288					2016-03-06
233	15.4	5.59	4.29	509	2016-03-06
437					2016-03-06
385	15.4	6.6	4.63	601	2016-03-06
443	18	5.68	4.3	406	2016-03-06
299					2016-03-06
454	20	5.63	3.89	497	2016-03-06
553	19.4	4.4	3.57	503	2016-03-06
424					2016-03-06
643	25.7	4.52	3.62	419	2016-03-06
484	21.4	5.5	3.96	451	2016-03-06
89	20.9	4.69	3.88	515	2016-03-06
150	25.1	4.71	4.11	544	2016-03-06
645	22.8	5.49	3.96	468	2016-03-06
38	17	5.11	4.09	538	2016-03-06
457	28.2	4.96	3.76	486	2016-03-06
248	24.6	5.51	4.06	505	2016-03-06
170	19.6	5.77	4.3	564	2016-03-06
640	17.7	5.44	4.13	487	2016-03-06
60	23.1	5.75	3.67	517	2016-03-06
106	22.5	5.17	4.09	442	2016-03-06
379	18.1	5.63	4.03	579	2016-03-06
12	22.5	4.93	3.89	447	2016-03-06
451	19	4.11	3.55	453	2016-03-06
517	14	5.95	4.42	424	2016-03-06
636	23.5	4.78	4	477	2016-03-06
634	19	5.1	4.16	538	2016-03-06
631	12.3	6.25	4.38	459	2016-03-06
629	16.9	6.47	3.78	499	2016-03-06
627	28.2	5.11	3.57	503	2016-03-06
624	23.2	4.49	3.84	499	2016-03-06
622	17.1	6.57	4.59	571	2016-03-06
618	20	6.6	4.25	541	2016-03-06
579					2016-03-06
140					2016-03-06
523					2016-03-06
211					2016-03-06
375					2016-03-06
234					2016-03-06
359					2016-03-06
121					2016-03-06
392					2016-03-06
278					2016-03-06
346					2016-03-06
135	22.4	5.88	4.28	528	2016-03-06
132	18.3	4.32	3.77	472	2016-03-06
212	21.9	7.18	5.08	477	2016-03-06
535	23.9	4.77	3.61	471	2016-03-06
257					2016-03-06
453					2016-03-06
58					2016-03-06
323					2016-03-06
602					2016-03-06
485					2016-03-06
205					2016-03-06
114					2016-03-06
540					2016-03-06
411					2016-03-06
246					2016-03-06
528	10.6	7.2	4.45	510	2016-03-06
441					2016-03-06
63					2016-03-06
546					2016-03-06
287					2016-03-06
492					2016-03-06
45					2016-03-06
247					2016-03-06
336					2016-03-06
400					2016-03-06
435					2016-03-06
177	16.4	4.75	3.92	494	2016-03-06
616					2016-03-06
1					2016-03-06
393					2016-03-06
518					2016-03-06
251					2016-03-06
548					2016-03-06
447	23.8	5.22	4	598	2016-03-06
491					2016-03-06
158					2016-03-06
427					2016-03-06
418	15.3	6.04	4.47	502	2016-03-06
603	11.2	5.42	4.22	453	2016-03-06
604	12.2	5.46	4.4	448	2016-03-06
107					2016-03-06
396	12.1	6.29	4.2	527	2016-03-06
608					2016-03-06
92					2016-03-06
310					2016-03-06
356	13.9	4.82	4.06	471	2016-03-06
169					2016-03-06
470					2016-03-06
104					2016-03-06
426					2016-03-06
425					2016-03-06
480					2016-03-06
499					2016-03-06
433					2016-03-06
450	11	5.6	3.89	639	2016-03-06
6					2016-03-06
423					2016-03-06
335					2016-03-06
590					2016-03-06
407					2016-03-06
354					2016-03-06
118	22.7	5.36	3.74	581	2016-03-06
311	29.5	5.83	4.27	547	2016-03-06
421	18.1	5.81	3.99	604	2016-03-06
314	14.5	4.25	3.6	475	2016-03-06
245	13.5	6.43	4.14	732	2016-03-06
614	25.8	5.22	3.7	540	2016-03-06
95					2016-03-06
204	13.5	5.73	4.07	508	2016-03-06
78	21.8	4.09	3.76	557	2016-03-06
428	13.5	5.91	4.16	456	2016-03-06
414	13.2	4.71	4.03	377	2016-03-06
139	15.8	5.44	4.21	406	2016-03-06
178					2016-03-06
625	14	5.48	3.95	442	2016-03-06
598	16.4	4.38	3.79	406	2016-03-06
597	14.8	5.1	4.09	334	2016-03-06
208					2016-03-06
343					2016-03-06
64	13	5.17	4.03	374	2016-03-06
117	17.9	4.76	3.63	475	2016-03-06
180	15.7	5.27	4.15	442	2016-03-06
145	15	3.74	4.12	406	2016-03-06
633	13.8	4.63	3.89	506	2016-03-06
46	13.4	5.01	4.14	510	2016-03-06
277	15	5.17	4.2	366	2016-03-06
21					2016-03-06
264	16.4	5.26	4.22	403	2016-03-06
596	17.1	4.69	3.62	418	2016-03-06
175					2016-03-06
650	16.2	5.25	3.75	414	2016-03-06
142					2016-03-06
161	17.5	5.31	3.94	476	2016-03-06
194					2016-03-06
573					2016-03-06
599	13	4.89	4	414	2016-03-06
565	18.7	4.86	3.79	433	2016-03-06
82	13.7	5.47	4.28	441	2016-03-06
4	12.6	6.14	4.06	375	2016-03-06
476					2016-03-06
430					2016-03-06
498	13.8	6.33	4.49	457	2016-03-06
76	17.2	5.4	4.24	457	2016-03-06
84	13.4	6.02	4.08	449	2016-03-06
18					2016-03-06
532					2016-03-06
124					2016-03-06
32					2016-03-06
459					2016-03-06
355					2016-03-06
413	14.9	4.96	3.93	413	2016-03-06
545					2016-03-06
474					2016-03-06
404					2016-03-06
112	16.8	5.37	3.51	503	2016-03-06
91					2016-03-06
268	16.9	5.3	4.01	428	2016-03-06
232	18.3	5.68	4.2	525	2016-03-06
153	18.4	5.22	4.06	466	2016-03-06
109	16.4	6.02	4.09	429	2016-03-06
40					2016-03-06
61	19.8	4.93	3.98	521	2016-03-06
68	17.8	4.74	3.72	411	2016-03-06
286					2016-03-06
394					2016-03-06
52	16.3	5.83	4.37	558	2016-03-06
617	18	4.66	3.75	577	2016-03-06
460	22.8	3.89	3.55	509	2016-03-06
307	19.3	4.83	3.75	516	2016-03-06
99	14.5	5.18	3.94	463	2016-03-06
273	18.2	4.44	3.69	462	2016-03-06
295	14	4.76	4.15	433	2016-03-06
541					2016-03-06
22					2016-03-06
589	14.9	6.45	4.27	507	2016-03-06
159	16	4.37	4.42	381	2016-03-06
14					2016-03-06
519					2016-03-06
398					2016-03-06
258					2016-03-06
87					2016-03-06
214					2016-03-06
360					2016-03-06
405					2016-03-06
338					2016-03-06
235	14.4	4.96	3.83	402	2016-03-06
254	23.4	4.4	3.66	474	2016-03-06
432					2016-03-06
201					2016-03-06
143					2016-03-06
189	15.6	4.04	3.61	396	2016-03-06
15					2016-03-06
231					2016-03-06
283					2016-03-06
69					2016-03-06
348					2016-03-06
133					2016-03-06
164	16.5	4.04	3.88	456	2016-03-06
167					2016-03-06
111					2016-03-06
71					2016-03-06
402					2016-03-06
644					2016-03-06
10					2016-03-06
472					2016-03-06
35					2016-03-06
65					2016-03-06
381					2016-03-06
101					2016-03-06
70					2016-03-06
431					2016-03-06
530					2016-03-06
324					2016-03-06
225					2016-03-06
27	20.5	5.85	4.07	493	2016-03-07
47	12.3	5.59	4.39	600	2016-03-07
125	20.6	5.98	4.19	585	2016-03-07
144	27.9	4.73	3.89	502	2016-03-07
253					2016-03-07
274	23	3.94	3.57	480	2016-03-07
192	15	7.51	4.61	576	2016-03-07
200	11.1	6.74	4.35	606	2016-03-07
361	23.4	6.28	4.52	553	2016-03-07
11	12.9	6.98	4.67	491	2016-03-07
466					2016-03-07
483	21.3	5.2	4.01	458	2016-03-07
632	18.1	5.85	4.35	555	2016-03-07
380	14.6	6.81	4.34	529	2016-03-07
8	19.3	4.24	4.04	566	2016-03-07
181	21.5	7.33	3.95	503	2016-03-07
24	27.4	5.63	4.17	600	2016-03-07
36	19.6	5.83	4.1	535	2016-03-07
37					2016-03-07
134	30.1	5.06	4.08	603	2016-03-07
209	25.4	6.21	3.95	570	2016-03-07
281	23.2	5.27	3.75	537	2016-03-07
269	15.3	6.16	4.21	501	2016-03-07
306	11.9	5.61	4.28	499	2016-03-07
54	18.9	5.59	4.29	475	2016-03-07
537	17.3	5.52	4.02	444	2016-03-07
113	16.9	5.31	3.67	370	2016-03-07
403					2016-03-07
188	21.5	5.04	4.14	542	2016-03-07
146	14.1	5.5	4.19	510	2016-03-07
384	14.8	7.1	4.39	537	2016-03-07
494	14.4	5.31	4.52	550	2016-03-07
183					2016-03-07
86	23.9	6.14	4.06	489	2016-03-07
543	19.9	6.01	4.18	542	2016-03-07
544	12.8	7.3	4.47	554	2016-03-07
547	18.2	6.33	4.05	475	2016-03-07
241	11.9	5.99	4.31	479	2016-03-07
410	17.5	6.15	3.92	544	2016-03-07
342	23.1	4.14	3.31	669	2016-03-07
173	26.6	4.18	3.81	520	2016-03-07
504	14	5.74	4.58	452	2016-03-07
179	11.9	5.92	4.33	474	2016-03-07
389	14.7	6.32	4.31	492	2016-03-07
2	25.9	5.18	4.09	489	2016-03-07
66	20.4	4.53	3.44	530	2016-03-07
119	19.2	5.13	4.05	440	2016-03-07
366	25.3	4.96	4.17	475	2016-03-07
369	17.3	4.47	4.1	469	2016-03-07
556	22.3	4.67	3.97	471	2016-03-07
291	17.3	6.4	4.29	544	2016-03-07
352					2016-03-07
292	14.2	6.3	4.19	486	2016-03-07
100	21.5	4.16	3.56	577	2016-03-07
490	13.4	7.19	4.38	585	2016-03-07
42	14.8	5.58	4.51	523	2016-03-07
406	21	5.47	3.93	526	2016-03-07
239	17.8	4.57	3.94	474	2016-03-07
103	16.2	6.02	4.56	483	2016-03-07
508					2016-03-07
195					2016-03-07
219					2016-03-07
267					2016-03-07
382					2016-03-07
477					2016-03-07
377					2016-03-07
216	16.1	5.18	4.39	444	2016-03-07
344	12	5.98	4.03	597	2016-03-07
74	13.6	5.76	4.21	554	2016-03-07
319					2016-03-07
90	26.1	5.04	3.87	575	2016-03-07
98	18.6	4.84	3.66	410	2016-03-07
236					2016-03-07
265	19.6	5.44	4.13	428	2016-03-07
193	13.1	4.93	4.09	456	2016-03-07
288					2016-03-07
233	16.2	5.69	4.3	547	2016-03-07
437					2016-03-07
385	14.4	6.7	4.66	627	2016-03-07
443	18.9	5.95	4.3	405	2016-03-07
299					2016-03-07
454	18.7	5.61	3.92	485	2016-03-07
553	19.2	4.27	3.56	499	2016-03-07
424					2016-03-07
643	25.9	4.61	3.62	432	2016-03-07
484	19.6	5.68	3.95	454	2016-03-07
89	20.8	4.76	3.94	517	2016-03-07
150	24.7	4.68	4.12	543	2016-03-07
645	21.6	5.74	3.97	455	2016-03-07
38	17.8	4.9	4.06	586	2016-03-07
457	29.2	4.5	3.72	490	2016-03-07
248	24	5.45	4.01	494	2016-03-07
170	21.5	6.52	4.3	568	2016-03-07
640	17.4	5.53	4.2	491	2016-03-07
60	22.1	5.76	3.73	488	2016-03-07
106	23.4	5.25	4.08	437	2016-03-07
379	17.5	5.44	4	568	2016-03-07
12	23.4	4.68	3.85	423	2016-03-07
451	19	3.94	3.52	451	2016-03-07
517	13.7	6.09	4.44	430	2016-03-07
636	23.6	4.67	4.02	467	2016-03-07
634	17.9	5.27	4.18	539	2016-03-07
631	10.9	6.25	4.4	454	2016-03-07
629	16.6	6.67	3.79	502	2016-03-07
627	29.6	5.08	3.63	501	2016-03-07
624	23.1	4.37	3.83	498	2016-03-07
622	16.4	7.02	4.58	548	2016-03-07
618	20.4	6.82	4.26	546	2016-03-07
579					2016-03-07
140					2016-03-07
523					2016-03-07
211					2016-03-07
375					2016-03-07
234					2016-03-07
359					2016-03-07
121					2016-03-07
392					2016-03-07
278					2016-03-07
346					2016-03-07
135	21.6	6.08	4.32	537	2016-03-07
132	19.8	4.42	3.7	490	2016-03-07
212	24.3	6.65	4.89	490	2016-03-07
535	24.4	4.77	3.58	476	2016-03-07
257					2016-03-07
453					2016-03-07
58					2016-03-07
323					2016-03-07
602					2016-03-07
485					2016-03-07
205					2016-03-07
114					2016-03-07
540					2016-03-07
411					2016-03-07
246					2016-03-07
528	10.6				2016-03-07
441					2016-03-07
63					2016-03-07
546					2016-03-07
287					2016-03-07
492					2016-03-07
45					2016-03-07
247					2016-03-07
336					2016-03-07
400					2016-03-07
435					2016-03-07
177	16.7	4.77	3.92	493	2016-03-07
616					2016-03-07
1					2016-03-07
393					2016-03-07
518					2016-03-07
251					2016-03-07
548					2016-03-07
447	24.4	5.37	4.01	597	2016-03-07
491					2016-03-07
158					2016-03-07
427					2016-03-07
418	15.3	6.07	4.45	513	2016-03-07
603	11.5	5.29	4.22	447	2016-03-07
604	11.8	5.5	4.41	451	2016-03-07
107					2016-03-07
396	11.6	6.22	4.2	529	2016-03-07
608					2016-03-07
92					2016-03-07
310					2016-03-07
356	13.4	4.73	4.07	481	2016-03-07
169					2016-03-07
470					2016-03-07
104					2016-03-07
426					2016-03-07
425					2016-03-07
480					2016-03-07
499					2016-03-07
433					2016-03-07
450	11.2	5.59	3.89	639	2016-03-07
6					2016-03-07
423					2016-03-07
335					2016-03-07
590					2016-03-07
407					2016-03-07
354					2016-03-07
118	21.7	5.82	3.71	566	2016-03-07
311	28.7	5.57	4.29	544	2016-03-07
421	16.8	5.88	4.02	597	2016-03-07
314	10.4	4.11	3.6	471	2016-03-07
245	14.7	6.14	4.05	719	2016-03-07
614	25.3	5.37	3.7	539	2016-03-07
95					2016-03-07
204	12.7	5.63	4.14	519	2016-03-07
78	21.5	4.12	3.76	539	2016-03-07
428	13.4	5.84	4.15	453	2016-03-07
414	13.2	4.39	4.01	382	2016-03-07
139	16.3	5.49	4.19	388	2016-03-07
178					2016-03-07
625	13.8	5.46	3.94	397	2016-03-07
598	17	4.93	3.73	374	2016-03-07
597	14.4	5.21	4.06	339	2016-03-07
208					2016-03-07
343					2016-03-07
64	14.3	4.98	4.03	378	2016-03-07
117	18.1	4.67	3.63	472	2016-03-07
180	17.1	5.9	4.09	453	2016-03-07
145	13.7	3.95	4.17	392	2016-03-07
633	13.9	4.67	3.9	510	2016-03-07
46	13.2	5.13	4.13	511	2016-03-07
277	15.1	5.11	4.22	370	2016-03-07
21					2016-03-07
264	17.1	5.65	4.21	400	2016-03-07
596	17	4.68	3.58	420	2016-03-07
175					2016-03-07
650	15.2	5.57	3.82	426	2016-03-07
142					2016-03-07
161	16.5	5.2	3.99	481	2016-03-07
194					2016-03-07
573					2016-03-07
599	13.1	4.9	4	412	2016-03-07
565	18.7	4.73	3.79	423	2016-03-07
82	14.1	5.46	4.29	431	2016-03-07
4	12.4	6.08	4.06	369	2016-03-07
476					2016-03-07
430					2016-03-07
498	13.7	6.05	4.45	451	2016-03-07
76	17.2	5.22	4.23	459	2016-03-07
84	13.1	5.85	4.08	448	2016-03-07
18					2016-03-07
532					2016-03-07
124					2016-03-07
32					2016-03-07
459					2016-03-07
355					2016-03-07
413	14.9	5.14	3.95	421	2016-03-07
545					2016-03-07
474					2016-03-07
404					2016-03-07
112	19.8	5.29	3.53	487	2016-03-07
91					2016-03-07
268	16	5.2	3.97	440	2016-03-07
232	18	5.66	4.2	526	2016-03-07
153	17.7	5.33	4.11	453	2016-03-07
109	16.3	6.08	4.16	427	2016-03-07
40					2016-03-07
61	20.6	4.97	4.01	439	2016-03-07
68	17.9	4.7	3.78	406	2016-03-07
286					2016-03-07
394					2016-03-07
52	16.1	5.88	4.38	505	2016-03-07
617	14.4	4.6	3.76	557	2016-03-07
[truncated: 7,153 more rows]

## Sheet: April 2016
Animal Number	Day Production	Fat indication	Protein indication	Weight	Date
27	17	5.97	4.11	513	2016-04-01
47	9.5	5.91	4.49	617	2016-04-01
125	18.2	6.27	4.22	586	2016-04-01
144	28.9	4.99	3.9	506	2016-04-01
253					2016-04-01
274	20.4	4.3	3.67	493	2016-04-01
192	13.4	7.18	4.56	596	2016-04-01
200					2016-04-01
361	21.1	6.06	4.43	543	2016-04-01
11	10.9	7.12	4.69	498	2016-04-01
466					2016-04-01
483	18	5.15	3.99	451	2016-04-01
632	18	6.17	4.31	569	2016-04-01
380					2016-04-01
8	16.3	3	4.02	584	2016-04-01
181	20.6	6.1	3.87	517	2016-04-01
24	30.8	5.38	4.1	630	2016-04-01
36	18	5.32	3.83	539	2016-04-01
37					2016-04-01
134	25.1	5.03	4.09	615	2016-04-01
209	23.6	5.93	3.91	568	2016-04-01
281	22.9	5.02	3.83	554	2016-04-01
269	14	6.26	4.17	530	2016-04-01
306					2016-04-01
54	18.9	5.94	4.24	485	2016-04-01
537	17.7	5.37	4.04	462	2016-04-01
113	15.9	5.37	3.78	382	2016-04-01
403					2016-04-01
188	19.3	4.89	4.12	542	2016-04-01
146	11.4	5.57	4.29	527	2016-04-01
384					2016-04-01
494					2016-04-01
183					2016-04-01
86	21.1	5.97	4.02	489	2016-04-01
543	17.1	6.1	4.17	562	2016-04-01
544	10.9	7.92	4.46	564	2016-04-01
547	16.1	5.71	3.8	499	2016-04-01
241					2016-04-01
410	17.2	6.11	3.85	544	2016-04-01
342	22.4	4.17	3.26	675	2016-04-01
173	25	4.27	3.77	515	2016-04-01
504	12	5.16	4.47	489	2016-04-01
179					2016-04-01
389	11.7	5.73	4.4	496	2016-04-01
2	21.8	6.04	4.15	480	2016-04-01
66	16	4.96	3.39	529	2016-04-01
119	18.4	5.52	4.1	453	2016-04-01
366	26.5	4.68	4.09	478	2016-04-01
369	15.2	4.73	4.08	487	2016-04-01
556	21.6	5.28	3.4	464	2016-04-01
291	15.2	6.8	4.37	547	2016-04-01
352	24.1	4.92	3.89	508	2016-04-01
292					2016-04-01
100	16.1	4.93	3.73	575	2016-04-01
490	12.8	6.79	4.22	590	2016-04-01
42	15.4	5.16	4.57	537	2016-04-01
406	16.8	5.98	3.99	535	2016-04-01
239	16.5	4.65	4.01	488	2016-04-01
103	14.3	5.97	4.62	495	2016-04-01
508					2016-04-01
195					2016-04-01
219					2016-04-01
267					2016-04-01
382					2016-04-01
477					2016-04-01
377					2016-04-01
216	15.5	5.4	4.43	451	2016-04-01
344					2016-04-01
74	11.6	6.18	4.24	553	2016-04-01
319					2016-04-01
90	21.3	4.72	3.94	562	2016-04-01
98	17.6	4.96	3.58	431	2016-04-01
236					2016-04-01
265	19.5	5.62	4.18	443	2016-04-01
193	11.8	5.27	4.13	453	2016-04-01
288					2016-04-01
233	14.4	5.5	4.16	518	2016-04-01
437					2016-04-01
385	12.6	6.43	4.51	619	2016-04-01
443	14.5	6.67	4.23	405	2016-04-01
299					2016-04-01
454	17.3	6.17	4.03	491	2016-04-01
553	17.5	4.51	3.47	503	2016-04-01
424					2016-04-01
643	20.4	4.47	3.58	440	2016-04-01
484	19	5.76	4	460	2016-04-01
89	20.9	4.59	3.98	510	2016-04-01
150	24.1	6.14	4.5	546	2016-04-01
645	22.5	5.8	3.95	463	2016-04-01
38					2016-04-01
457	29.8	4.98	3.86	503	2016-04-01
248	24.1	5.08	3.96	505	2016-04-01
170	20.5	5.58	4.27	539	2016-04-01
640	17	5.66	4.12	517	2016-04-01
60	20.5	5.92	3.82	523	2016-04-01
106	21	5.63	4.15	441	2016-04-01
379	16.6	5.47	4.09	576	2016-04-01
12	22.6	5.08	3.95	448	2016-04-01
451	16.6	3.93	3.47	455	2016-04-01
517					2016-04-01
636	23.3	4.89	4.03	473	2016-04-01
634	14.5	5.61	4.35	545	2016-04-01
631	10.6	6.22	4.49	467	2016-04-01
629	17.5	6.7	3.79	515	2016-04-01
627	30.3	4.78	3.85	525	2016-04-01
624	21.2	4.59	3.85	502	2016-04-01
622	15	7.46	4.52	593	2016-04-01
618	17.8	6.06	4.37	526	2016-04-01
579					2016-04-01
140					2016-04-01
523					2016-04-01
211					2016-04-01
375					2016-04-01
234					2016-04-01
359					2016-04-01
121					2016-04-01
392					2016-04-01
278					2016-04-01
346					2016-04-01
135	21.4	6.31	4.36	552	2016-04-01
132	19.3	4.39	3.75	487	2016-04-01
212	29.7	5.59	4.05	483	2016-04-01
535	24.3	4.75	3.61	495	2016-04-01
257					2016-04-01
453					2016-04-01
58					2016-04-01
323					2016-04-01
602					2016-04-01
485					2016-04-01
205					2016-04-01
114					2016-04-01
540					2016-04-01
411					2016-04-01
246					2016-04-01
528					2016-04-01
441					2016-04-01
63					2016-04-01
546					2016-04-01
287	18.3	5.74	4.06	471	2016-04-01
492					2016-04-01
45					2016-04-01
247	9.9	5.31	5.21		2016-04-01
336					2016-04-01
400					2016-04-01
435					2016-04-01
177	15.2	4.45	3.99	506	2016-04-01
616					2016-04-01
1					2016-04-01
393					2016-04-01
518					2016-04-01
251					2016-04-01
548	24.3	5.38	4.28	435	2016-04-01
447	23	5.9	4.08	581	2016-04-01
491					2016-04-01
158	28.3	4.98	3.94	517	2016-04-01
427					2016-04-01
418	14.6	6.05	4.46	519	2016-04-01
603					2016-04-01
604	11	5.89	4.42	466	2016-04-01
107					2016-04-01
396	10.9	6.48	4.2	540	2016-04-01
608					2016-04-01
92					2016-04-01
310					2016-04-01
356	12.7	4.34	4.14	526	2016-04-01
169					2016-04-01
470					2016-04-01
104					2016-04-01
426					2016-04-01
425					2016-04-01
480					2016-04-01
499					2016-04-01
433					2016-04-01
450					2016-04-01
6					2016-04-01
423					2016-04-01
335					2016-04-01
590					2016-04-01
407					2016-04-01
354					2016-04-01
118	19.7	5.91	3.65	576	2016-04-01
311	27.4	5.53	4.29	538	2016-04-01
421	15.7	6.53	4.24	614	2016-04-01
314	12.4	4.68	3.56	471	2016-04-01
245	10.8	6.54	3.96	737	2016-04-01
614	22.1	4.67	3.54	530	2016-04-01
95					2016-04-01
204	12.9	5.74	4.1	545	2016-04-01
78	19.6	3.96	3.75	549	2016-04-01
428	12.6	5.87	4.06	472	2016-04-01
414	11.6	4.28	4.04	387	2016-04-01
139	15.3	5.82	4.27	417	2016-04-01
178					2016-04-01
625	11.9	5.49	3.8	414	2016-04-01
598	15.8	4.59	3.71	385	2016-04-01
597	13.5	4.94	4.13	345	2016-04-01
208					2016-04-01
343					2016-04-01
64	13.1	5.14	3.91	382	2016-04-01
117	16.3	4.85	3.64	493	2016-04-01
180	16.1	4.86	3.87	451	2016-04-01
145	14.2	3.66	3.8	418	2016-04-01
633	13	4.46	3.77	512	2016-04-01
46	12	4.81	3.9	529	2016-04-01
277	14.4	5.44	4.19	381	2016-04-01
21					2016-04-01
264	15.6	4.68	3.9	405	2016-04-01
596	16.3	4.01	3.34	426	2016-04-01
175					2016-04-01
650	14.5	5.35	3.82	436	2016-04-01
142					2016-04-01
161	16.8	4.97	4.01	481	2016-04-01
194					2016-04-01
573					2016-04-01
599	11.4	4.82	3.86	416	2016-04-01
565	16.5	5.04	3.71	432	2016-04-01
82	10.7	5.72	4.24	450	2016-04-01
4	11.2	6.31	3.94	383	2016-04-01
476					2016-04-01
430					2016-04-01
498	13.4	6.32	4.41	465	2016-04-01
76	15.6	5.69	4.23	451	2016-04-01
84	12.6	5.92	4	467	2016-04-01
18					2016-04-01
532					2016-04-01
124					2016-04-01
32					2016-04-01
459					2016-04-01
355					2016-04-01
413	13.4	5.26	4.03	437	2016-04-01
545					2016-04-01
474					2016-04-01
404					2016-04-01
112	9.7	6.1	3.47	467	2016-04-01
91					2016-04-01
268	14.3	5.85	4.09	431	2016-04-01
232	18.5	5.09	4.17	528	2016-04-01
153	18.7	4.54	4.14	486	2016-04-01
109	13.9	6.04	4.18	438	2016-04-01
40					2016-04-01
61	18.8	5.03	4.2	489	2016-04-01
68	17	5.21	4	454	2016-04-01
286					2016-04-01
394					2016-04-01
52	14.1	5.94	4.41	520	2016-04-01
617	15.8	4.76	3.71	552	2016-04-01
460	19.8	3.94	3.53	502	2016-04-01
307	16.9	4.94	3.72	526	2016-04-01
99	13.6	5.22	3.94	463	2016-04-01
273	17.6	4.19	3.55	452	2016-04-01
295	14	5.02	4.13	448	2016-04-01
541					2016-04-01
22					2016-04-01
589	12.6	5.73	4	506	2016-04-01
159	14.2	5.27	4.45	396	2016-04-01
14					2016-04-01
519					2016-04-01
398					2016-04-01
258					2016-04-01
87					2016-04-01
214					2016-04-01
360					2016-04-01
405					2016-04-01
338					2016-04-01
235	13.7	4.77	3.83	421	2016-04-01
254	23.7	4.63	3.72	484	2016-04-01
432					2016-04-01
201					2016-04-01
143					2016-04-01
189	15.9	4.46	3.63	415	2016-04-01
15					2016-04-01
231					2016-04-01
283					2016-04-01
69					2016-04-01
348					2016-04-01
133					2016-04-01
164	15.9	4.74	3.88	383	2016-04-01
167					2016-04-01
111					2016-04-01
71					2016-04-01
402					2016-04-01
644					2016-04-01
10					2016-04-01
472					2016-04-01
35					2016-04-01
65					2016-04-01
429					2016-04-01
171					2016-04-01
294					2016-04-01
381	13.6	5.17	3.88	411	2016-04-01
458					2016-04-01
101	16.6	6.7	4.57	375	2016-04-01
70	22.9	2.11	4.11	455	2016-04-01
79					2016-04-01
431	8.4	9.34	5.24		2016-04-01
347					2016-04-01
641					2016-04-01
530					2016-04-01
324					2016-04-01
225					2016-04-01
27	16.3	5.95	4.12	509	2016-04-02
47	10	6.03	4.52	623	2016-04-02
125	17.6	6.44	4.21	599	2016-04-02
144	29.1	4.83	3.94	504	2016-04-02
253					2016-04-02
274	20.4	4.36	3.66	494	2016-04-02
192	12.8	7.41	4.6	592	2016-04-02
200					2016-04-02
361	21.2	6.27	4.46	553	2016-04-02
11	10.8	7.06	4.67	492	2016-04-02
466					2016-04-02
483	18.2	5.76	4.05	444	2016-04-02
632	17.8	6.08	4.32	563	2016-04-02
380					2016-04-02
8	15.7	3.38	4.05	577	2016-04-02
181	20.7	5.76	3.86	516	2016-04-02
24	29.8	6.13	4.1	628	2016-04-02
36	17.7	5.23	3.89	554	2016-04-02
37					2016-04-02
134	27	5.42	4.1	604	2016-04-02
209	23.7	5.6	3.96	571	2016-04-02
281	23.5	4.81	3.81	564	2016-04-02
269	14.2	6.45	4.21	536	2016-04-02
306					2016-04-02
54	18.4	5.47	4.24	495	2016-04-02
537	18.3	5.13	4.04	458	2016-04-02
113	16.5	5.37	3.78	391	2016-04-02
403					2016-04-02
188	19	5.01	4.12	548	2016-04-02
146	11.9	5.29	4.25	530	2016-04-02
384					2016-04-02
494					2016-04-02
183					2016-04-02
86	20.5	5.45	4.04	495	2016-04-02
543	18.5	6.23	4.18	568	2016-04-02
544	11.3	8.03	4.48	568	2016-04-02
547	17	5.77	3.82	499	2016-04-02
241					2016-04-02
410	17	6.17	3.92	566	2016-04-02
342	22	4.28	3.26	667	2016-04-02
173	26.7	4.21	3.86	520	2016-04-02
504	13.1	5.26	4.47	465	2016-04-02
179					2016-04-02
389	11.7	5.89	4.41	494	2016-04-02
2	19.3	6.07	4.16	497	2016-04-02
66	16.3	5.01	3.33	506	2016-04-02
119	18.3	5.36	4.05	446	2016-04-02
366	25.5	4.92	4.13	482	2016-04-02
369	13.9	4.99	4.06	475	2016-04-02
556	20.6	5.42	3.71	463	2016-04-02
291	16.1	6.66	4.35	550	2016-04-02
352	21.6	4.92	3.88	504	2016-04-02
292					2016-04-02
100	17	5.1	3.74	585	2016-04-02
490	12.9	6.98	4.26	591	2016-04-02
42	14.8	5.23	4.63	525	2016-04-02
406	16.6	6.25	3.93	532	2016-04-02
239	16.6	4.81	3.99	491	2016-04-02
103	13.1	5.92	4.63	486	2016-04-02
508					2016-04-02
195					2016-04-02
219					2016-04-02
267					2016-04-02
382					2016-04-02
477					2016-04-02
377					2016-04-02
216	15.8	5.22	4.39	441	2016-04-02
344					2016-04-02
74	11.7	6.19	4.27	562	2016-04-02
319					2016-04-02
90	21.5	4.5	3.96	594	2016-04-02
98	18.1	4.84	3.54	452	2016-04-02
236					2016-04-02
265	19.4	5.61	4.18	438	2016-04-02
193	11	5.52	4.15	470	2016-04-02
288					2016-04-02
233	14.8	5.61	4.19	534	2016-04-02
437					2016-04-02
385	12.2	6.21	4.48	616	2016-04-02
443	13.3	6.37	4.27	411	2016-04-02
299					2016-04-02
454	16.9	6.07	4.04	495	2016-04-02
553	17.7	4.65	3.48	510	2016-04-02
424					2016-04-02
643	26.1	4.65	3.68	445	2016-04-02
484	18.8	5.73	4.03	456	2016-04-02
89	20.3	4.56	4	514	2016-04-02
150	23.3	5.66	4.51	559	2016-04-02
645	20.4	6.25	4	473	2016-04-02
38					2016-04-02
457	28.6	5.62	3.87	510	2016-04-02
248	24.3	5.13	3.94	510	2016-04-02
170	17.1	6.11	4.35	559	2016-04-02
640	17.4	5.5	4.13	521	2016-04-02
60	20.8	5.9	3.83	516	2016-04-02
106	20.3	5.71	4.12	432	2016-04-02
379	16	5.46	4.13	601	2016-04-02
12	21.3	4.97	3.94	442	2016-04-02
451	6.6	4.26	3.42	432	2016-04-02
517					2016-04-02
636	22.9	4.8	4.05	475	2016-04-02
634	14.9	5.43	4.37	553	2016-04-02
631	10.2	6.33	4.5	465	2016-04-02
629	17.6	6.96	3.81	499	2016-04-02
627	27.4	4.49	3.89	530	2016-04-02
624	19.8	4.51	3.89	508	2016-04-02
622	14.6	7.23	4.53	591	2016-04-02
618	17.8	6.21	4.41	532	2016-04-02
579					2016-04-02
140					2016-04-02
523					2016-04-02
211					2016-04-02
375					2016-04-02
234					2016-04-02
359					2016-04-02
121					2016-04-02
392					2016-04-02
278					2016-04-02
346					2016-04-02
135	20.6	6.14	4.38	545	2016-04-02
132	18.4	4.43	3.81	501	2016-04-02
212	29.1	5.07	4.05	478	2016-04-02
535	23.6	4.92	3.6	491	2016-04-02
257					2016-04-02
453					2016-04-02
58					2016-04-02
323					2016-04-02
602					2016-04-02
485					2016-04-02
205					2016-04-02
114					2016-04-02
540					2016-04-02
411					2016-04-02
246					2016-04-02
528					2016-04-02
441					2016-04-02
63					2016-04-02
546					2016-04-02
287	17.9	5.3	4.09	442	2016-04-02
492					2016-04-02
45					2016-04-02
247	16.2	6.81	5.18	399	2016-04-02
336					2016-04-02
400					2016-04-02
435					2016-04-02
177	15.2	4.71	3.97	500	2016-04-02
616					2016-04-02
1					2016-04-02
393					2016-04-02
518					2016-04-02
251					2016-04-02
548	24	4.75	4.21	443	2016-04-02
447	23.4	5.77	4.05	597	2016-04-02
491					2016-04-02
158	27.7	5.17	4.05	520	2016-04-02
427					2016-04-02
418	13.9	6.16	4.45	507	2016-04-02
603					2016-04-02
604	10.4	5.85	4.37	463	2016-04-02
107					2016-04-02
396	10.4	6.45	4.18	539	2016-04-02
608					2016-04-02
92					2016-04-02
310					2016-04-02
356	11.9	4.23	4.13	481	2016-04-02
169					2016-04-02
470					2016-04-02
104					2016-04-02
426					2016-04-02
425					2016-04-02
480					2016-04-02
499					2016-04-02
433					2016-04-02
450					2016-04-02
6					2016-04-02
423					2016-04-02
335					2016-04-02
590					2016-04-02
407					2016-04-02
354					2016-04-02
118	19.4	5.71	3.71	547	2016-04-02
311	26	5.72	4.26	543	2016-04-02
421	15.9	6.63	4.24	608	2016-04-02
314	12.4	4.66	3.58	479	2016-04-02
245	10.3	6.97	4.09	744	2016-04-02
614	22.3	4.61	3.54	537	2016-04-02
95					2016-04-02
204	13.1	5.72	4.1	543	2016-04-02
78	20.5	4.06	3.71	540	2016-04-02
428	12.3	5.86	4.02	465	2016-04-02
414	12.1	4.48	4.05	385	2016-04-02
139	14.8	5.56	4.25	409	2016-04-02
178					2016-04-02
625	12.9	5.34	3.85	412	2016-04-02
598	15.7	4.52	3.71	384	2016-04-02
597	13.4	4.98	4.12	345	2016-04-02
208					2016-04-02
343					2016-04-02
64	12.8	5.25	3.93	373	2016-04-02
117	16.5	4.81	3.63	499	2016-04-02
180	16	4.96	3.9	459	2016-04-02
145	14.3	3.51	3.79	418	2016-04-02
633	11.8	4.85	3.86	511	2016-04-02
46	12.6	4.63	3.9	528	2016-04-02
277	14.6	5.35	4.19	380	2016-04-02
21					2016-04-02
264	15	4.81	3.91	411	2016-04-02
596	16.2	4.09	3.38	423	2016-04-02
175					2016-04-02
650	13.5	5.4	3.83	438	2016-04-02
142					2016-04-02
161	17.3	4.77	4.05	494	2016-04-02
194					2016-04-02
573					2016-04-02
599	11	4.81	3.91	418	2016-04-02
565	16.5	5.02	3.69	434	2016-04-02
82	11.4	5.51	4.23	443	2016-04-02
4	11.9	6.23	4	384	2016-04-02
476					2016-04-02
430					2016-04-02
498	13.2	6.39	4.41	466	2016-04-02
76	14.9	5.71	4.23	461	2016-04-02
84	10.7	6.05	4.03	451	2016-04-02
18					2016-04-02
532					2016-04-02
124					2016-04-02
32					2016-04-02
459					2016-04-02
355					2016-04-02
413	14.6	5.31	4.02	449	2016-04-02
545					2016-04-02
474					2016-04-02
404					2016-04-02
112	11.8	5.62	3.37	477	2016-04-02
91					2016-04-02
268	14.3	6	4.08	437	2016-04-02
232	18.5	5.06	4.18	531	2016-04-02
153	18.4	4.34	4.15	462	2016-04-02
109	14.3	6.16	4.17	436	2016-04-02
40					2016-04-02
61	19.3	4.81	4.21	455	2016-04-02
68	16.6	5.02	4	418	2016-04-02
286					2016-04-02
394					2016-04-02
52	14.1	6.04	4.41	513	2016-04-02
617	16.2	4.62	3.7	560	2016-04-02
460	20.6	3.97	3.52	550	2016-04-02
307	17.1	5.01	3.72	527	2016-04-02
99	13	5.35	3.93	470	2016-04-02
273	17.8	4.24	3.52	455	2016-04-02
295	13.9	5.08	4.13	457	2016-04-02
541					2016-04-02
22					2016-04-02
589	12.8	5.77	4.02	508	2016-04-02
159	14.6	5.46	4.46	393	2016-04-02
14					2016-04-02
519					2016-04-02
398					2016-04-02
258					2016-04-02
87					2016-04-02
214					2016-04-02
360					2016-04-02
405					2016-04-02
338					2016-04-02
235	13.7	4.85	3.84	431	2016-04-02
254	24.3	4.75	3.72	476	2016-04-02
432					2016-04-02
201					2016-04-02
143					2016-04-02
189	16.3	4.45	3.66	418	2016-04-02
15					2016-04-02
231					2016-04-02
283					2016-04-02
69					2016-04-02
348					2016-04-02
133					2016-04-02
164	16.3	4.72	3.88	378	2016-04-02
167					2016-04-02
111					2016-04-02
71					2016-04-02
402					2016-04-02
644					2016-04-02
10					2016-04-02
472					2016-04-02
35					2016-04-02
65					2016-04-02
429					2016-04-02
171					2016-04-02
294					2016-04-02
381	10.5	4.64	3.86	416	2016-04-02
458					2016-04-02
101	16.7	6.08	4.51	375	2016-04-02
70	22.1	2.15	4.01	455	2016-04-02
79					2016-04-02
431	7.5	7.4	5.04	379	2016-04-02
347					2016-04-02
641					2016-04-02
530					2016-04-02
324					2016-04-02
225					2016-04-02
27	17.1	6.28	4.08	501	2016-04-03
47	10.5	5.88	4.47	586	2016-04-03
125	17.3	6.26	4.1	601	2016-04-03
144	26.3	4.94	3.92	498	2016-04-03
253					2016-04-03
274	10.5	4.8	3.67	494	2016-04-03
192	12.2	7.7	4.65	591	2016-04-03
200					2016-04-03
361	21.5	6.21	4.38	562	2016-04-03
11	10.1	6.87	4.68	516	2016-04-03
466					2016-04-03
483	18	5.7	3.86	453	2016-04-03
632	18	6.1	4.3	570	2016-04-03
380					2016-04-03
8	15.4	3.19	4.12	582	2016-04-03
181	20.7	6.26	3.85	525	2016-04-03
24	30.1	5.94	4.04	683	2016-04-03
36	17.2	5.3	3.88	549	2016-04-03
37					2016-04-03
134	26.8	5.77	4.17	616	2016-04-03
209	24.8	5.94	3.99	568	2016-04-03
281	24.8	4.84	3.88	562	2016-04-03
269	14.3	6.42	4.21	552	2016-04-03
306					2016-04-03
54	17.8	5.69	4.24	492	2016-04-03
537	17.6	4.9	4.04	445	2016-04-03
113	16.1	5.32	3.76	382	2016-04-03
403					2016-04-03
188	17.9	4.99	4.13	529	2016-04-03
146	11.8	5.29	4.25	508	2016-04-03
384					2016-04-03
494					2016-04-03
183					2016-04-03
86	22	5.45	4.02	499	2016-04-03
543	16.9	6.34	4.15	532	2016-04-03
544	11.9	7.8	4.44	560	2016-04-03
547	16.7	5.84	3.87	501	2016-04-03
241					2016-04-03
410	17.5	6.26	3.91	578	2016-04-03
342	21.9	4.31	3.25	663	2016-04-03
173	24.8	4.86	3.87	508	2016-04-03
504	12.3	5.45	4.45	459	2016-04-03
179					2016-04-03
389	10.8	6.02	4.42	498	2016-04-03
2	22	6.49	4.1	495	2016-04-03
66	10.9	4.98	3.31	502	2016-04-03
119	18	5.38	4.08	469	2016-04-03
366	24.7	4.73	4.1	475	2016-04-03
369	13.3	5	4.04	478	2016-04-03
556	18.7	5.02	3.77	449	2016-04-03
291	15.5	6.53	4.35	556	2016-04-03
352	21.6	4.97	3.84	506	2016-04-03
292					2016-04-03
100	14.6	5.19	3.79	568	2016-04-03
490	12.4	6.97	4.24	598	2016-04-03
42	15.1	5.2	4.66	532	2016-04-03
406	18.6	6.13	3.76	532	2016-04-03
239	16.6	4.83	4.02	484	2016-04-03
103	11.9	5.82	4.67	489	2016-04-03
508					2016-04-03
195					2016-04-03
219					2016-04-03
267					2016-04-03
382					2016-04-03
477					2016-04-03
377					2016-04-03
216	15.6	5	4.42	449	2016-04-03
344					2016-04-03
74	12.7	6.03	4.24	559	2016-04-03
319					2016-04-03
90	22.8	4.54	3.9	604	2016-04-03
98	17.8	4.76	3.56	415	2016-04-03
236					2016-04-03
265	18.4	5.65	4.15	437	2016-04-03
193	11.5	5.52	4.12	470	2016-04-03
288					2016-04-03
233	14.9	5.66	4.18	525	2016-04-03
437					2016-04-03
385	11.6	6.72	4.55	616	2016-04-03
443	12.8	6.68	4.33	419	2016-04-03
299					2016-04-03
454	15.9	6.1	4.07	489	2016-04-03
553	18.7	4.68	3.51	490	2016-04-03
424					2016-04-03
643	22.5	4.64	3.58	447	2016-04-03
484	16.7	5.74	4.11	451	2016-04-03
89	19.9	4.78	3.99	504	2016-04-03
150	23.3	5.15	4.47	555	2016-04-03
645	19.8	5.93	3.99	472	2016-04-03
38					2016-04-03
457	28.3	5.21	3.88	504	2016-04-03
248	23.9	4.95	3.89	503	2016-04-03
170	17.3	5.89	4.27	561	2016-04-03
640	16.1	5.86	4.16	525	2016-04-03
60	20.2	5.7	3.83	511	2016-04-03
106	20.9	5.75	4.08	431	2016-04-03
379	15.6	5.38	4.23	569	2016-04-03
12	23.3	5.16	3.9	460	2016-04-03
451	6.8	4.46	3.31	428	2016-04-03
517					2016-04-03
636	21.6	4.95	4.05	479	2016-04-03
634	13.7	4.9	4.37	553	2016-04-03
631	10.5	6.2	4.45	455	2016-04-03
629	16.7	6.92	3.72	495	2016-04-03
627	29.3	4.61	3.83	524	2016-04-03
624	20	4.67	3.85	491	2016-04-03
622	14.4	7.24	4.56	591	2016-04-03
618	17	6.2	4.38	510	2016-04-03
579					2016-04-03
140					2016-04-03
523					2016-04-03
211					2016-04-03
375					2016-04-03
234					2016-04-03
359					2016-04-03
121					2016-04-03
392					2016-04-03
278					2016-04-03
346					2016-04-03
135	19.9	6.64	4.39	546	2016-04-03
132	18.9	4.31	3.83	494	2016-04-03
212	29.2	5.48	4.1	474	2016-04-03
535	24	4.95	3.5	484	2016-04-03
257					2016-04-03
453					2016-04-03
58					2016-04-03
323					2016-04-03
602					2016-04-03
485					2016-04-03
205					2016-04-03
114					2016-04-03
540					2016-04-03
411					2016-04-03
246					2016-04-03
528					2016-04-03
441					2016-04-03
63					2016-04-03
546					2016-04-03
287	17.8	4.87	4.07	440	2016-04-03
492					2016-04-03
45					2016-04-03
247	12	7.63	5.08	400	2016-04-03
336					2016-04-03
400					2016-04-03
435					2016-04-03
177	14.4	4.68	3.97	500	2016-04-03
616					2016-04-03
1					2016-04-03
393					2016-04-03
518					2016-04-03
251					2016-04-03
548	25.2	4.54	4.06	445	2016-04-03
447	22.7	5.74	4.08	598	2016-04-03
491					2016-04-03
158	26.5	4.93	4.01	521	2016-04-03
427					2016-04-03
418	13	6.15	4.4	498	2016-04-03
603					2016-04-03
604	10.9	5.63	4.36	461	2016-04-03
107					2016-04-03
396	11.1	6.58	4.18	534	2016-04-03
608					2016-04-03
92					2016-04-03
310					2016-04-03
356	12	3.87	4.11	483	2016-04-03
169					2016-04-03
470					2016-04-03
104					2016-04-03
426					2016-04-03
425					2016-04-03
480					2016-04-03
499					2016-04-03
433					2016-04-03
450					2016-04-03
6					2016-04-03
423					2016-04-03
335					2016-04-03
590					2016-04-03
407					2016-04-03
354					2016-04-03
118	18.3	5.65	3.64	545	2016-04-03
311	26.2	5.69	4.28	568	2016-04-03
421	15.7	6.5	4.23	610	2016-04-03
314	12.7	4.48	3.53	476	2016-04-03
245	9.9	7.06	4.11	754	2016-04-03
614	22	4.41	3.4	562	2016-04-03
95					2016-04-03
204	13.3	5.63	4.08	541	2016-04-03
78	19.8	4.07	3.69	543	2016-04-03
428	12.4	5.87	4	464	2016-04-03
414	11.7	4.56	4.04	380	2016-04-03
139	15.6	5.57	4.27	411	2016-04-03
178					2016-04-03
625	12	5.75	3.98	463	2016-04-03
598	15.6	4.51	3.68	386	2016-04-03
597	12.3	4.99	4.16	334	2016-04-03
208					2016-04-03
343					2016-04-03
64	12.9	5.13	3.93	374	2016-04-03
117	16.1	4.69	3.6	494	2016-04-03
180	15.8	5.05	3.9	447	2016-04-03
145	13.9	3.53	3.77	415	2016-04-03
633	12.1	5	3.84	499	2016-04-03
46	12.7	4.49	3.89	518	2016-04-03
277	13.5	5.17	4.21	391	2016-04-03
21					2016-04-03
264	14.8	4.87	3.9	411	2016-04-03
596	16.1	4.26	3.36	419	2016-04-03
175					2016-04-03
650	13.5	5.61	3.85	431	2016-04-03
142					2016-04-03
161	15.8	4.75	4.08	493	2016-04-03
194					2016-04-03
573					2016-04-03
599	11.4	4.76	3.93	413	2016-04-03
565	16.8	4.92	3.7	436	2016-04-03
82	11.2	5.71	4.22	442	2016-04-03
4	12.3	6.16	4.02	426	2016-04-03
476					2016-04-03
430					2016-04-03
498	13.4	6.35	4.43	468	2016-04-03
76	15.1	5.76	4.23	465	2016-04-03
84	12	5.88	4.03	446	2016-04-03
18					2016-04-03
532					2016-04-03
124					2016-04-03
32					2016-04-03
459					2016-04-03
355					2016-04-03
413	13.1	5.13	4.07	444	2016-04-03
545					2016-04-03
474					2016-04-03
404					2016-04-03
112	12.7	5.62	3.31	473	2016-04-03
91					2016-04-03
268	12	5.95	4.13	426	2016-04-03
232	19.3	5.36	4.12	537	2016-04-03
153	14.5	4.61	4.19	455	2016-04-03
109	13.8	6.21	4.16	442	2016-04-03
40					2016-04-03
61	18.2	5.02	4.17	497	2016-04-03
68	15.4	5.32	3.95	427	2016-04-03
286					2016-04-03
394					2016-04-03
52	14.4	6.05	4.39	520	2016-04-03
617	15.2	4.56	3.73	561	2016-04-03
460	20.6	4.08	3.5	514	2016-04-03
307	16.7	5.07	3.7	534	2016-04-03
99	13.2	5.37	3.92	465	2016-04-03
273	18.1	4.25	3.5	452	2016-04-03
295	12.4	5.07	4.19	454	2016-04-03
541					2016-04-03
22					2016-04-03
589	13.1	5.75	4	514	2016-04-03
159	14.4	5.6	4.48	381	2016-04-03
14					2016-04-03
519					2016-04-03
398					2016-04-03
258					2016-04-03
87					2016-04-03
214					2016-04-03
360					2016-04-03
405					2016-04-03
338					2016-04-03
235	13.2	4.88	3.88	425	2016-04-03
254	23	4.72	3.71	474	2016-04-03
432					2016-04-03
201					2016-04-03
143					2016-04-03
189	16.9	4	3.67	415	2016-04-03
15					2016-04-03
231					2016-04-03
283					2016-04-03
69					2016-04-03
348					2016-04-03
133					2016-04-03
164	17	4.74	3.87	387	2016-04-03
167					2016-04-03
111					2016-04-03
71					2016-04-03
402					2016-04-03
644					2016-04-03
10					2016-04-03
472					2016-04-03
35					2016-04-03
65					2016-04-03
429					2016-04-03
171					2016-04-03
294					2016-04-03
381	11.7	4.7	3.82	430	2016-04-03
458					2016-04-03
101	14.6	5.71	4.32	364	2016-04-03
70	19.7	2.33	3.87	436	2016-04-03
79					2016-04-03
431	12	6.95	4.8	386	2016-04-03
347					2016-04-03
641					2016-04-03
530					2016-04-03
324					2016-04-03
225					2016-04-03
27	15.5	6.17	4.01	509	2016-04-04
47					2016-04-04
125	15.7	6.39	4.08	586	2016-04-04
144	29.2	4.94	3.75	509	2016-04-04
253					2016-04-04
274	17.4	5.12	3.23	509	2016-04-04
192	10.9	7.85	4.63	589	2016-04-04
200					2016-04-04
361	19.7	6.27	4.38	553	2016-04-04
11					2016-04-04
466					2016-04-04
483	17.4	5.72	3.83	450	2016-04-04
632	16.7	6	4.27	566	2016-04-04
380					2016-04-04
8	15	3.46	4.07	577	2016-04-04
181	19.6	5.76	3.72	515	2016-04-04
24	27.8	5.55	4.03	626	2016-04-04
36	16.9	5.18	3.83	542	2016-04-04
37					2016-04-04
134	24.6	5.42	4.08	628	2016-04-04
209	21.9	6.04	3.91	567	2016-04-04
281	23.3	4.92	3.92	551	2016-04-04
269	13.8	6.26	4.19	510	2016-04-04
306					2016-04-04
54	16.7	5.91	4.18	495	2016-04-04
537	16.7	4.81	4.02	461	2016-04-04
113	14.9	5.4	3.73	383	2016-04-04
403					2016-04-04
188	18	5.02	4.09	546	2016-04-04
146	11.1	5.55	4.22	521	2016-04-04
384					2016-04-04
494					2016-04-04
183					2016-04-04
86	18.6	5.86	3.97	504	2016-04-04
543	17.6	6.09	4.04	552	2016-04-04
544	11.4	7.44	4.42	570	2016-04-04
547	16.1	5.72	3.84	497	2016-04-04
241					2016-04-04
410	15.8	6.49	3.85	560	2016-04-04
342	21.2	4.2	3.22	667	2016-04-04
173	22.9	4.71	3.74	491	2016-04-04
504	11.9	5.48	4.42	462	2016-04-04
179					2016-04-04
389	10.4	6.04	4.45	491	2016-04-04
2	21.1	6.11	4.1	489	2016-04-04
66	15.8	4.88	3.32	506	2016-04-04
119	17.7	5.13	4	449	2016-04-04
366	22.9	4.84	4.04	474	2016-04-04
369	12.9	4.95	3.99	486	2016-04-04
556	19.2	4.68	3.65	451	2016-04-04
291	15.4	6.4	4.26	555	2016-04-04
352	21	5.49	3.86	502	2016-04-04
292					2016-04-04
100	14.3	5.24	3.69	571	2016-04-04
490	12.2	6.74	4.18	588	2016-04-04
42	14.5	5.24	4.61	528	2016-04-04
406	17.8	5.97	3.79	551	2016-04-04
239	15.6	4.71	3.96	484	2016-04-04
103	12.5	6.19	4.64	495	2016-04-04
508					2016-04-04
195					2016-04-04
219					2016-04-04
267					2016-04-04
382					2016-04-04
477					2016-04-04
377					2016-04-04
216	11.4	5.39	4.45	443	2016-04-04
344					2016-04-04
74	11.6	5.95	4.2	559	2016-04-04
319					2016-04-04
90	21.3	4.64	3.84	608	2016-04-04
98	19.3	4.66	3.5	416	2016-04-04
236					2016-04-04
265	17.9	5.88	4.04	448	2016-04-04
193	11	5.42	4.08	476	2016-04-04
288					2016-04-04
233	13.9	5.51	4.14	528	2016-04-04
437					2016-04-04
385	11.1	6.75	4.52	622	2016-04-04
443	12.6	6.73	4.31	417	2016-04-04
299					2016-04-04
454	16.2	6.08	3.96	495	2016-04-04
553	17.3	4.53	3.52	488	2016-04-04
424					2016-04-04
643	20.3	4.54	3.48	444	2016-04-04
484	13.3	6.42	3.96	489	2016-04-04
89	19.4	4.79	3.88	511	2016-04-04
150	22.8	4.96	4.4	560	2016-04-04
645	19.5	5.5	3.89	472	2016-04-04
38					2016-04-04
457	26.1	4.96	3.83	509	2016-04-04
248	23.7	5.15	3.91	513	2016-04-04
170	16.6	5.84	4.26	572	2016-04-04
640	14.3	6.06	4.15	526	2016-04-04
60	18.1	5.7	3.82	524	2016-04-04
106	18.5	5.8	4.03	438	2016-04-04
379	14.1	5.53	4.22	580	2016-04-04
12	20	5.33	3.84	447	2016-04-04
451	7	5.02	2.86	437	2016-04-04
517					2016-04-04
636	21	4.65	4.03	475	2016-04-04
634	14.9	5.02	4.27	548	2016-04-04
631					2016-04-04
629	17	6.91	3.69	529	2016-04-04
627	26.4	5.24	3.81	521	2016-04-04
624	20.6	4.71	3.78	495	2016-04-04
622	13	7.49	4.56	606	2016-04-04
618	15.7	6.76	4.29	497	2016-04-04
579					2016-04-04
140					2016-04-04
523					2016-04-04
211					2016-04-04
375					2016-04-04
234					2016-04-04
359					2016-04-04
121					2016-04-04
392					2016-04-04
278					2016-04-04
346					2016-04-04
135	19.5	6.61	4.29	552	2016-04-04
132	16.5	4.48	3.79	498	2016-04-04
212	24.8	5.83	4.15	482	2016-04-04
535	22.4	4.7	3.42	491	2016-04-04
257					2016-04-04
453					2016-04-04
58					2016-04-04
323					2016-04-04
602					2016-04-04
485					2016-04-04
205					2016-04-04
114					2016-04-04
540					2016-04-04
411					2016-04-04
246					2016-04-04
528					2016-04-04
441					2016-04-04
63					2016-04-04
546					2016-04-04
287	16.7	5.08	3.99	435	2016-04-04
492					2016-04-04
45					2016-04-04
247	13	7.44	4.97	398	2016-04-04
336					2016-04-04
400					2016-04-04
435					2016-04-04
177	14.2	4.59	3.9	500	2016-04-04
616					2016-04-04
1					2016-04-04
393					2016-04-04
518					2016-04-04
251					2016-04-04
548	23.7	4.5	3.98	445	2016-04-04
447	21.6	5.74	4.04	587	2016-04-04
491					2016-04-04
158	25.7	4.92	3.96	520	2016-04-04
427					2016-04-04
418	13.2	6.11	4.36	538	2016-04-04
603					2016-04-04
604	10.6	5.72	4.33	449	2016-04-04
107					2016-04-04
396	10.1	6.46	4.12	535	2016-04-04
608					2016-04-04
92					2016-04-04
310					2016-04-04
356	11.8	4.12	4.08	486	2016-04-04
169					2016-04-04
470					2016-04-04
104					2016-04-04
426					2016-04-04
425					2016-04-04
480					2016-04-04
499					2016-04-04
433					2016-04-04
450					2016-04-04
6					2016-04-04
423					2016-04-04
335					2016-04-04
590					2016-04-04
407					2016-04-04
354					2016-04-04
118	17.9	6	3.61	566	2016-04-04
311	23.4	5.61	4.26	542	2016-04-04
421	15.5	6.47	4.16	613	2016-04-04
314	11.1	4.27	3.51	486	2016-04-04
245	9.1	7.14	4.15	747	2016-04-04
614	21.3	4.54	3.32	527	2016-04-04
95					2016-04-04
204	13	5.59	4.05	544	2016-04-04
78	20.1	3.87	3.6	552	2016-04-04
428	12.8	5.9	3.96	471	2016-04-04
414	11.8	4.65	4.01	384	2016-04-04
139	14.1	5.46	4.22	410	2016-04-04
178					2016-04-04
625	11.6	5.65	3.95	427	2016-04-04
598	15.1	4.29	3.61	387	2016-04-04
597	11.3	4.98	4.14	348	2016-04-04
208					2016-04-04
343					2016-04-04
64	13.1	5.21	3.86	375	2016-04-04
117	15.2	4.7	3.58	547	2016-04-04
180	15.3	5.2	3.89	450	2016-04-04
145	14.1	3.57	3.75	422	2016-04-04
633	12.8	4.77	3.76	500	2016-04-04
46	12.4	4.46	3.84	514	2016-04-04
277	13.3	5.3	4.15	367	2016-04-04
21					2016-04-04
264	14.6	4.63	3.84	411	2016-04-04
596	15.1	4.21	3.24	418	2016-04-04
175					2016-04-04
650	13.1	5.34	3.76	441	2016-04-04
142					2016-04-04
161	15	4.98	3.98	486	2016-04-04
194					2016-04-04
573					2016-04-04
599	11.2	4.97	3.85	417	2016-04-04
565	16.7	4.79	3.7	432	2016-04-04
82	11	5.6	4.19	460	2016-04-04
4	11.3	6.12	3.97	391	2016-04-04
476					2016-04-04
430					2016-04-04
498	12.9	6.57	4.38	472	2016-04-04
76	15.4	5.78	4.2	463	2016-04-04
84	10.4	5.98	4.01	454	2016-04-04
18					2016-04-04
532					2016-04-04
124					2016-04-04
32					2016-04-04
459					2016-04-04
355					2016-04-04
413	12.8	4.98	4.02	448	2016-04-04
545					2016-04-04
474					2016-04-04
404					2016-04-04
112	12.5	5.32	3.38	470	2016-04-04
91					2016-04-04
268	10.6	5.77	3.99	435	2016-04-04
232	18.8	5.45	4.08	521	2016-04-04
153	8.6	4.59	4.19	443	2016-04-04
109	13.4	6.17	4.11	438	2016-04-04
40					2016-04-04
61	17.9	5.13	4.11	449	2016-04-04
68	16.3	5.37	3.87	417	2016-04-04
286					2016-04-04
394					2016-04-04
52	13.8	6	4.28	513	2016-04-04
617	15.5	4.42	3.7	564	2016-04-04
460	19.9	4.02	3.47	519	2016-04-04
307	16.8	4.98	3.6	524	2016-04-04
99	13.1	5.24	3.87	506	2016-04-04
273	18	4.18	3.45	447	2016-04-04
295	11.9	5.11	4.15	450	2016-04-04
541					2016-04-04
22					2016-04-04
589	13.1	5.57	3.94	515	2016-04-04
159	13.7	5.49	4.45	386	2016-04-04
14					2016-04-04
519					2016-04-04
398					2016-04-04
258					2016-04-04
87					2016-04-04
214					2016-04-04
360					2016-04-04
405					2016-04-04
338					2016-04-04
235	13.6	4.78	3.82	433	2016-04-04
254	22.1	4.94	3.65	483	2016-04-04
432					2016-04-04
201					2016-04-04
143					2016-04-04
189	16.9	3.96	3.58	413	2016-04-04
15					2016-04-04
231					2016-04-04
283					2016-04-04
69					2016-04-04
348					2016-04-04
133					2016-04-04
164	16.5	4.77	3.83	380	2016-04-04
167					2016-04-04
111					2016-04-04
71					2016-04-04
402					2016-04-04
644					2016-04-04
10					2016-04-04
472					2016-04-04
35					2016-04-04
65					2016-04-04
429					2016-04-04
171					2016-04-04
294					2016-04-04
381	13.5	4.56	3.8	438	2016-04-04
458					2016-04-04
101	14.2	5.75	4.27	357	2016-04-04
70	16.2	1.71	3.84	428	2016-04-04
79					2016-04-04
431	13.7	5.76	4.48	380	2016-04-04
347					2016-04-04
641					2016-04-04
530					2016-04-04
324					2016-04-04
225					2016-04-04
27	16.4	5.84	3.96	508	2016-04-05
47					2016-04-05
125	17.9	6.43	4.07	596	2016-04-05
144	25.9	4.66	3.8	511	2016-04-05
253					2016-04-05
274	19.3	4.66	3.23	464	2016-04-05
192	12.5	7.93	4.63	590	2016-04-05
200					2016-04-05
361	20.6	6.27	4.34	562	2016-04-05
11					2016-04-05
466					2016-04-05
483	18.3	5.65	3.82	451	2016-04-05
632	17	5.97	4.2	566	2016-04-05
380					2016-04-05
8	14.4	3.87	4.1	587	2016-04-05
181	19	5.78	3.69	513	2016-04-05
24	29.2	5.66	3.9	634	2016-04-05
36	16.7	5.2	3.76	540	2016-04-05
37					2016-04-05
134	24.8	5.54	4.03	627	2016-04-05
209	21.5	6.51	3.8	559	2016-04-05
281	22	4.97	3.92	534	2016-04-05
269	13.6	6.01	4.18	543	2016-04-05
306					2016-04-05
54	17.2	5.73	4.14	461	2016-04-05
537	16.3	5.06	3.97	454	2016-04-05
113	14.5	5.66	3.68	380	2016-04-05
403					2016-04-05
188	18	4.94	4.03	538	2016-04-05
146	11.8	5.69	4.21	531	2016-04-05
384					2016-04-05
494					2016-04-05
183					2016-04-05
86	19	5.74	3.95	495	2016-04-05
543	17.2	5.9	4.01	550	2016-04-05
544	24.8	7.12	4.32	566	2016-04-05
547	15.8	5.63	3.77	497	2016-04-05
241					2016-04-05
410	16.4	6.53	3.81	570	2016-04-05
342	21	4.17	3.19	685	2016-04-05
173	24.9	4.79	3.72	517	2016-04-05
504	12.4	5.82	4.44	461	2016-04-05
179					2016-04-05
389	10.5	5.95	4.42	514	2016-04-05
2	21.6	5.94	4.09	463	2016-04-05
66	14.5	4.4	3.28	513	2016-04-05
119	18.2	5.16	3.98	462	2016-04-05
366	25.1	4.78	3.95	474	2016-04-05
369	13.8	4.93	3.98	480	2016-04-05
556	19.1	4.88	3.63	461	2016-04-05
291	13.9	6.6	4.26	550	2016-04-05
352	20.1	5.34	3.89	507	2016-04-05
292					2016-04-05
100	15.3	5.16	3.62	564	2016-04-05
490	12.3	6.7	4.08	593	2016-04-05
42	14.6	5.23	4.57	521	2016-04-05
406	18.4	5.99	3.79	527	2016-04-05
239	15	4.83	3.9	489	2016-04-05
103	12.4	6.29	4.57	502	2016-04-05
508					2016-04-05
195					2016-04-05
219					2016-04-05
267					2016-04-05
382					2016-04-05
477					2016-04-05
377					2016-04-05
216	6.1	5.1	4.58	437	2016-04-05
344					2016-04-05
74	11.9	5.89	4.16	529	2016-04-05
319					2016-04-05
90	21.5	4.44	3.91	580	2016-04-05
98	18.2	4.52	3.48	420	2016-04-05
236					2016-04-05
265	16.4	5.64	3.99	448	2016-04-05
193	11.1	5.12	4.06	475	2016-04-05
288					2016-04-05
233	13.6	5.25	4.13	528	2016-04-05
437					2016-04-05
385	11.6	6.72	4.51	614	2016-04-05
443	12.2	6.87	4.26	410	2016-04-05
299					2016-04-05
454	15.7	5.95	3.87	487	2016-04-05
553	17.8	4.58	3.47	502	2016-04-05
424					2016-04-05
643	21	4.68	3.44	440	2016-04-05
484	15.8	5.81	3.6	460	2016-04-05
89	20.4	4.76	3.84	510	2016-04-05
150	22	5.34	4.41	557	2016-04-05
645	17.9	5.59	3.83	457	2016-04-05
38					2016-04-05
457	26.9	5.18	3.83	504	2016-04-05
248	23.8	5.03	3.83	508	2016-04-05
170	16.1	6.16	4.24	579	2016-04-05
640	14.9	6.01	4.11	517	2016-04-05
60	19.3	5.87	3.7	518	2016-04-05
106	20	5.82	3.97	430	2016-04-05
379	14.8	5.11	4.07	585	2016-04-05
12	21.8	5.52	3.79	461	2016-04-05
451	10.1	4.43	2.41	433	2016-04-05
517					2016-04-05
636	21.2	4.77	3.98	482	2016-04-05
634	14.6	5.27	4.27	559	2016-04-05
631					2016-04-05
629	16.1	6.76	3.67	508	2016-04-05
627	27.5	4.88	3.88	516	2016-04-05
624	20.4	4.53	3.7	494	2016-04-05
622	12.6	7.34	4.5	586	2016-04-05
618	15.9	6.85	4.19	533	2016-04-05
579					2016-04-05
140					2016-04-05
523					2016-04-05
211					2016-04-05
375					2016-04-05
234					2016-04-05
359					2016-04-05
121					2016-04-05
392					2016-04-05
278					2016-04-05
346					2016-04-05
135	19.2	6.14	4.26	554	2016-04-05
132	16.4	4.66	3.69	461	2016-04-05
212	25.8	5.57	4.08	458	2016-04-05
535	23.7	4.5	3.42	484	2016-04-05
257					2016-04-05
453					2016-04-05
58					2016-04-05
323					2016-04-05
602					2016-04-05
485					2016-04-05
205					2016-04-05
114					2016-04-05
540					2016-04-05
411					2016-04-05
246					2016-04-05
528					2016-04-05
441					2016-04-05
63					2016-04-05
546					2016-04-05
287	18.4	5.07	3.86	431	2016-04-05
492					2016-04-05
45					2016-04-05
247	14.8	7.17	4.73	401	2016-04-05
336					2016-04-05
400					2016-04-05
435					2016-04-05
177	14.6	4.65	3.85	503	2016-04-05
616					2016-04-05
1					2016-04-05
393					2016-04-05
518					2016-04-05
251					2016-04-05
548	23.1	4.83	3.93	443	2016-04-05
447	21.6	5.65	4.01	614	2016-04-05
491					2016-04-05
158	26	4.64	3.9	495	2016-04-05
427					2016-04-05
418	11.7	6.06	4.29	511	2016-04-05
603					2016-04-05
604	11.2	5.54	4.32	480	2016-04-05
107					2016-04-05
396	10	6.46	4.13	534	2016-04-05
608					2016-04-05
92					2016-04-05
310					2016-04-05
356	12.1	4	4.03	483	2016-04-05
169					2016-04-05
470					2016-04-05
104					2016-04-05
426					2016-04-05
425					2016-04-05
480					2016-04-05
499					2016-04-05
433					2016-04-05
450					2016-04-05
6					2016-04-05
423					2016-04-05
335					2016-04-05
590					2016-04-05
407					2016-04-05
354					2016-04-05
118	17.4	5.6	3.6	567	2016-04-05
311	25	5.41	4.21	527	2016-04-05
421	16.2	6.59	4.11	621	2016-04-05
314	9.9	4.39	3.39	486	2016-04-05
245	9.6	7.08	4.11	754	2016-04-05
614	21.2	4.59	3.31	544	2016-04-05
95					2016-04-05
204	13.4	5.42	4.02	541	2016-04-05
78	20.1	3.83	3.56	551	2016-04-05
428	13	6.04	3.98	463	2016-04-05
414	11.8	4.58	3.99	382	2016-04-05
139	13.4	5.37	4.23	423	2016-04-05
178					2016-04-05
625	12.4	5.58	3.87	414	2016-04-05
598	15.4	4.37	3.6	386	2016-04-05
597	12.8	5	4.07	341	2016-04-05
208					2016-04-05
343					2016-04-05
64	12.7	5.17	3.85	380	2016-04-05
117	15.6	4.78	3.58	489	2016-04-05
180	15.9	5.26	3.87	443	2016-04-05
145	14.3	3.6	3.73	412	2016-04-05
633	13	4.67	3.71	499	2016-04-05
46	12.7	4.52	3.76	524	2016-04-05
277	14.1	5.57	4.1	379	2016-04-05
21					2016-04-05
264	14.7	4.47	3.76	412	2016-04-05
596	15.7	4.11	3.12	422	2016-04-05
175					2016-04-05
650	14.1	5.46	3.66	500	2016-04-05
142					2016-04-05
161	15.7	5.06	3.93	491	2016-04-05
194					2016-04-05
573					2016-04-05
599	11.3	4.86	3.81	412	2016-04-05
565	15.3	4.88	3.7	433	2016-04-05
82	10.7	5.7	4.21	459	2016-04-05
4	11.8	6.08	3.9	383	2016-04-05
476					2016-04-05
430					2016-04-05
498	12.2	6.41	4.31	471	2016-04-05
76	15.7	5.9	4.14	455	2016-04-05
84	11.8	5.8	3.85	460	2016-04-05
18					2016-04-05
532					2016-04-05
124					2016-04-05
32					2016-04-05
459					2016-04-05
355					2016-04-05
413	13.1	5.09	4.05	442	2016-04-05
545					2016-04-05
474					2016-04-05
404					2016-04-05
112	12.3	5.09	3.44	478	2016-04-05
91					2016-04-05
268	11.9	5.85	3.92	392	2016-04-05
232	17.8	5.24	4.05	513	2016-04-05
153	11.5	5.6	3.91	442	2016-04-05
109	14.1	6.21	4.04	441	2016-04-05
40					2016-04-05
61	17.8	5.19	4.1	449	2016-04-05
68	16.7	5.83	3.77	468	2016-04-05
286					2016-04-05
394					2016-04-05
52	13.8	6.25	4.27	513	2016-04-05
617	15.7	4.43	3.69	568	2016-04-05
460	21.2	3.95	3.4	518	2016-04-05
307	17	4.92	3.56	522	2016-04-05
99	12.8	5.35	3.87	466	2016-04-05
273	17.3	4.05	3.42	449	2016-04-05
295	12.3	5.13	4.12	442	2016-04-05
541					2016-04-05
22					2016-04-05
589	13	5.58	3.95	512	2016-04-05
159	13.8	5.56	4.43	384	2016-04-05
14					2016-04-05
519					2016-04-05
398					2016-04-05
258					2016-04-05
87					2016-04-05
214					2016-04-05
360					2016-04-05
405					2016-04-05
338					2016-04-05
235	13.7	4.79	3.8	431	2016-04-05
254	23.1	4.98	3.63	475	2016-04-05
432					2016-04-05
201					2016-04-05
143					2016-04-05
189	16.4	4.13	3.56	466	2016-04-05
15					2016-04-05
231					2016-04-05
283					2016-04-05
69					2016-04-05
348					2016-04-05
133					2016-04-05
164	15.8	4.59	3.87	399	2016-04-05
167					2016-04-05
111					2016-04-05
71					2016-04-05
402					2016-04-05
644					2016-04-05
10					2016-04-05
472					2016-04-05
35					2016-04-05
65					2016-04-05
429					2016-04-05
171					2016-04-05
294					2016-04-05
381					2016-04-05
458					2016-04-05
101	11.5	5.52	4.18	348	2016-04-05
70	15.9	2.41	3.76	444	2016-04-05
79					2016-04-05
431	15.2	5.56	4.28	385	2016-04-05
347					2016-04-05
641					2016-04-05
530					2016-04-05
324					2016-04-05
225					2016-04-05
27	15.9	5.82	4	515	2016-04-06
47					2016-04-06
125	17.8	6.3	4.1	596	2016-04-06
144	26.8	4.9	3.84	512	2016-04-06
253					2016-04-06
274	20.9	4.5	3.55	469	2016-04-06
192	12.4	7.99	4.62	591	2016-04-06
200					2016-04-06
361	19.6	5.98	4.36	564	2016-04-06
11					2016-04-06
466					2016-04-06
483	19.3	5.28	3.84	450	2016-04-06
632	17	6.18	4.18	577	2016-04-06
380					2016-04-06
8	13.8	3.88	4.21	582	2016-04-06
181	20	5.95	3.7	522	2016-04-06
24	30.5	4.7	3.83	629	2016-04-06
36	17.1	5.32	3.79	546	2016-04-06
37					2016-04-06
134	25.8	5.37	4.01	618	2016-04-06
209	21.4	6.7	3.77	561	2016-04-06
281	23.9	5	3.77	547	2016-04-06
269	12.2	5.91	4.21	492	2016-04-06
306					2016-04-06
54	15.9	5.88	3.98	486	2016-04-06
537	16.5	5.13	3.97	455	2016-04-06
113	14.6	5.91	3.65	385	2016-04-06
403					2016-04-06
188	19.6	4.73	3.95	562	2016-04-06
146	12	5.75	4.22	516	2016-04-06
384					2016-04-06
494					2016-04-06
183	3.7	5.39	5.92		2016-04-06
86	20.1	5.85	3.91	497	2016-04-06
543	16.9	5.91	4	562	2016-04-06
544	11.4	7.43	4.33	566	2016-04-06
547	15.7	5.57	3.76	502	2016-04-06
241					2016-04-06
410	16.6	6.82	3.78	562	2016-04-06
342	20.3	4.19	3.21	671	2016-04-06
173	25.2	4.69	3.77	502	2016-04-06
504	12.1	5.89	4.45	467	2016-04-06
179					2016-04-06
389	9.4	6.1	4.4	506	2016-04-06
2	18.2	6.02	4.16	469	2016-04-06
66	16.1	4.57	3.28	519	2016-04-06
119	16.7	5.13	3.98	451	2016-04-06
366	25.5	4.79	3.99	491	2016-04-06
369	15.2	4.88	3.94	481	2016-04-06
556	21.7	5.19	3.64	458	2016-04-06
291	14.3	6.9	4.27	551	2016-04-06
352	21.3	5.11	3.83	531	2016-04-06
292					2016-04-06
100	15.5	5.2	3.62	574	2016-04-06
490	12.2	6.85	4.07	597	2016-04-06
42	14.7	5.37	4.52	532	2016-04-06
406	18.5	5.65	3.79	541	2016-04-06
239	15	4.82	3.83	480	2016-04-06
103	12.2	6.47	4.57	490	2016-04-06
508					2016-04-06
195					2016-04-06
219					2016-04-06
267					2016-04-06
382					2016-04-06
477					2016-04-06
377					2016-04-06
216	8.1	6.01	4.44	429	2016-04-06
344					2016-04-06
74	11.7	5.94	4.14	514	2016-04-06
319					2016-04-06
90	23.8	4.47	3.83	609	2016-04-06
98	17.3	4.52	3.51	416	2016-04-06
236					2016-04-06
265	18.5	5.52	4.02	477	2016-04-06
193	10.7	5.01	4.07	497	2016-04-06
288					2016-04-06
233	13.8	5.36	4.15	530	2016-04-06
437					2016-04-06
385	11.2	6.6	4.43	615	2016-04-06
443	12.8	6.79	4.22	423	2016-04-06
299					2016-04-06
454	16.8	5.92	3.82	493	2016-04-06
553	17.5	4.63	3.49	503	2016-04-06
424					2016-04-06
643	23.4	4.58	3.46	442	2016-04-06
484	18.6	5.72	3.72	452	2016-04-06
89	21.1	4.64	3.86	512	2016-04-06
150	22.7	5.22	4.37	561	2016-04-06
645	20.3	5.59	3.75	475	2016-04-06
38					2016-04-06
457	29.6	4.8	3.8	508	2016-04-06
248	22.9	5.24	3.84	503	2016-04-06
170	15.2	6.07	4.21	566	2016-04-06
640	15.2	6.1	4.05	514	2016-04-06
60	18.6	5.78	3.66	527	2016-04-06
106	20.7	5.63	3.99	435	2016-04-06
379	14.9	5.15	4	587	2016-04-06
12	21.3	5.38	3.8	450	2016-04-06
451	11.9	4.12	2.53	427	2016-04-06
517					2016-04-06
636	21.3	5.03	3.95	476	2016-04-06
634	14.9	4.92	4.34	550	2016-04-06
631					2016-04-06
629	17.3	6.88	3.65	509	2016-04-06
627	28.9	4.96	3.87	522	2016-04-06
624	19.4	4.52	3.79	505	2016-04-06
622	14.5	7.28	4.45	594	2016-04-06
618	16	6.76	4.17	533	2016-04-06
579					2016-04-06
140					2016-04-06
523					2016-04-06
211					2016-04-06
375					2016-04-06
234					2016-04-06
359					2016-04-06
121					2016-04-06
392					2016-04-06
278					2016-04-06
346					2016-04-06
135	20.8	6.4	4.28	545	2016-04-06
132	17.3	4.56	3.59	483	2016-04-06
212	26.9	4.7	3.97	454	2016-04-06
535	24.1	4.48	3.42	491	2016-04-06
257					2016-04-06
453					2016-04-06
58					2016-04-06
323					2016-04-06
602					2016-04-06
485					2016-04-06
205					2016-04-06
114					2016-04-06
540					2016-04-06
411					2016-04-06
246					2016-04-06
528					2016-04-06
441					2016-04-06
63					2016-04-06
546					2016-04-06
287	20	5.03	3.88	433	2016-04-06
492					2016-04-06
45					2016-04-06
247	14.6	5.78	4.29	401	2016-04-06
336					2016-04-06
400					2016-04-06
435					2016-04-06
177	14.7	4.69	3.88	508	2016-04-06
616					2016-04-06
1					2016-04-06
393					2016-04-06
518					2016-04-06
251					2016-04-06
548	24.5	4.79	3.87	440	2016-04-06
447	21.3	5.63	4.02	600	2016-04-06
491					2016-04-06
158	28.7	4.69	3.87	525	2016-04-06
427					2016-04-06
418	11.8	5.88	4.27	541	2016-04-06
603					2016-04-06
604	9.4	5.68	4.38	467	2016-04-06
107					2016-04-06
396	9.5	6.71	4.17	534	2016-04-06
608					2016-04-06
92					2016-04-06
310					2016-04-06
356	12.2	3.89	4.08	500	2016-04-06
169					2016-04-06
470					2016-04-06
104					2016-04-06
426					2016-04-06
425					2016-04-06
480					2016-04-06
499					2016-04-06
433					2016-04-06
450					2016-04-06
6					2016-04-06
423					2016-04-06
335					2016-04-06
590					2016-04-06
407					2016-04-06
354					2016-04-06
118	18.7	5.46	3.55	546	2016-04-06
311	27.3	5.58	4.09	521	2016-04-06
421	15.8	6.52	4.09	616	2016-04-06
314	11	4.36	3.32	468	2016-04-06
245	9.5	7.07	4.05	746	2016-04-06
614	21.1	4.35	3.33	548	2016-04-06
95					2016-04-06
204	12.6	5.37	4.02	539	2016-04-06
78	19.1	3.94	3.58	539	2016-04-06
428	12.3	6.08	4.02	472	2016-04-06
414	12.1	4.56	4.02	385	2016-04-06
139	12.3	5.38	4.24	433	2016-04-06
178					2016-04-06
625	11.9	5.72	3.87	417	2016-04-06
598	15	4.25	3.58	389	2016-04-06
597	12.2	5.08	4.05	349	2016-04-06
208					2016-04-06
343					2016-04-06
64	12.4	5.15	3.86	377	2016-04-06
117	14.8	5.03	3.59	491	2016-04-06
180	14	5.17	3.9	448	2016-04-06
145	14	3.66	3.72	406	2016-04-06
633	13	4.5	3.72	504	2016-04-06
46	10.5	4.13	3.75	550	2016-04-06
277	13.5	5.73	4.1	380	2016-04-06
21					2016-04-06
264	14.7	4.58	3.76	405	2016-04-06
596	16.2	3.96	3.1	429	2016-04-06
175					2016-04-06
650	14.1	5.32	3.64	441	2016-04-06
142					2016-04-06
161	15.6	5.11	3.9	495	2016-04-06
194					2016-04-06
573					2016-04-06
599	10.5	4.73	3.79	422	2016-04-06
565	15.1	4.9	3.68	440	2016-04-06
82	11.5	5.4	4.2	461	2016-04-06
4	11.6	5.98	3.87	380	2016-04-06
476					2016-04-06
430					2016-04-06
498	13.2	6.14	4.26	468	2016-04-06
76	15.3	5.94	4.13	464	2016-04-06
84	12.1	6.12	3.81	456	2016-04-06
18					2016-04-06
532					2016-04-06
124					2016-04-06
32					2016-04-06
459					2016-04-06
355					2016-04-06
413	12.7	5.29	4.07	444	2016-04-06
545					2016-04-06
474					2016-04-06
404					2016-04-06
112	12.2	4.79	3.52	490	2016-04-06
91					2016-04-06
268	11	5.79	3.75	431	2016-04-06
232	19	5.21	4.03	520	2016-04-06
153	15.4	5.81	3.66	446	2016-04-06
109	13.8	6.23	4.03	442	2016-04-06
40					2016-04-06
61	18.8	5.15	4.14	451	2016-04-06
68	15.9	5.48	3.83	419	2016-04-06
286					2016-04-06
394					2016-04-06
52	13.7	5.94	4.22	517	2016-04-06
617	15.3	4.34	3.68	551	2016-04-06
460	21.1	3.98	3.37	512	2016-04-06
307	16.7	4.88	3.56	524	2016-04-06
99	12	5.43	3.89	476	2016-04-06
273	17	4.16	3.44	451	2016-04-06
295	12.7	5.15	4.02	448	2016-04-06
541					2016-04-06
22					2016-04-06
589	12.9	5.68	3.99	520	2016-04-06
159	14.4	5.77	4.43	386	2016-04-06
14					2016-04-06
519					2016-04-06
398					2016-04-06
258					2016-04-06
87					2016-04-06
214					2016-04-06
360					2016-04-06
405					2016-04-06
338					2016-04-06
235	12.9	4.76	3.82	432	2016-04-06
254	23.3	4.84	3.63	482	2016-04-06
432					2016-04-06
201					2016-04-06
143					2016-04-06
189	17.1	3.87	3.62	418	2016-04-06
15					2016-04-06
231					2016-04-06
283					2016-04-06
69					2016-04-06
348					2016-04-06
133					2016-04-06
164	15.6	4.72	3.85	388	2016-04-06
167					2016-04-06
111					2016-04-06
71					2016-04-06
402					2016-04-06
644					2016-04-06
10					2016-04-06
472					2016-04-06
35					2016-04-06
65					2016-04-06
429					2016-04-06
171					2016-04-06
294					2016-04-06
381	5.6	4.61	3.91		2016-04-06
458					2016-04-06
101	12.6	5.46	4.11	360	2016-04-06
70	17.7	2.57	3.78	423	2016-04-06
79					2016-04-06
431	15.5	5.16	4.07	379	2016-04-06
347					2016-04-06
641					2016-04-06
530					2016-04-06
324					2016-04-06
225					2016-04-06
27	15.5	5.99	4.09	523	2016-04-07
47					2016-04-07
125	19.1	6.08	4.14	608	2016-04-07
144	28	4.64	3.82	516	2016-04-07
253					2016-04-07
274	19.7	4.69	3.63	496	2016-04-07
192	11.5	7.95	4.68	598	2016-04-07
200					2016-04-07
361	19.1	5.94	4.38	570	2016-04-07
11					2016-04-07
466					2016-04-07
483	19.7	5.4	3.93	458	2016-04-07
632	17.3	6.91	4.23	567	2016-04-07
380					2016-04-07
8	12.7	4.21	4.18	587	2016-04-07
181	19.1	6.32	3.77	522	2016-04-07
24	30.7	5.62	4.01	638	2016-04-07
36	16.6	5.43	3.85	555	2016-04-07
37					2016-04-07
134	27	5.51	4.04	643	2016-04-07
209	22.2	6.24	3.81	570	2016-04-07
281	24.4	5.03	3.67	555	2016-04-07
269	10.5	6.25	4.25	544	2016-04-07
306					2016-04-07
54	17.8	6.28	3.93	487	2016-04-07
537	15.8	4.85	4.03	468	2016-04-07
113	14.8	5.88	3.61	382	2016-04-07
403					2016-04-07
188	18.1	4.66	3.97	557	2016-04-07
146	10.2	5.76	4.24	527	2016-04-07
384					2016-04-07
494					2016-04-07
183	10.4	5.85	5.61	562	2016-04-07
86	20.3	6.12	3.91	501	2016-04-07
543	17.4	6.1	4.02	557	2016-04-07
544	10.5	7.67	4.35	566	2016-04-07
547	16.2	5.66	3.72	506	2016-04-07
241					2016-04-07
410	15.7	6.88	3.79	574	2016-04-07
342	20	4	3.23	669	2016-04-07
173	25.6	4.59	3.74	518	2016-04-07
504	12.5	5.83	4.5	465	2016-04-07
179					2016-04-07
389	9.2	6.22	4.44	498	2016-04-07
2	20	6.09	4.1	492	2016-04-07
66	15.7	4.82	3.31	519	2016-04-07
119	16.6	5.33	4.03	455	2016-04-07
366	24.3	4.64	4.06	484	2016-04-07
369	14.9	4.7	3.97	491	2016-04-07
556	20.7	5.1	3.89	462	2016-04-07
291	14.2	6.92	4.22	555	2016-04-07
352	22.4	5.34	3.82	505	2016-04-07
292					2016-04-07
100	15.9	5.16	3.68	595	2016-04-07
490	12.6	7.16	4.07	601	2016-04-07
42	14.6	5.71	4.51	513	2016-04-07
406	18.3	5.66	3.84	540	2016-04-07
239	15.1	4.78	3.82	493	2016-04-07
103	11.4	6.18	4.55	504	2016-04-07
508					2016-04-07
195					2016-04-07
219					2016-04-07
267					2016-04-07
382					2016-04-07
477					2016-04-07
377					2016-04-07
216	11.1	7.02	4.05	429	2016-04-07
344					2016-04-07
74	11.3	6.16	4.15	565	2016-04-07
319					2016-04-07
90	22.9	4.72	3.89	622	2016-04-07
98	17.8	4.62	3.48	421	2016-04-07
236					2016-04-07
265	18.7	5.86	4.07	441	2016-04-07
193	10.1	4.95	4.08	484	2016-04-07
288					2016-04-07
233	13.1	5.26	4.18	530	2016-04-07
437					2016-04-07
385	11.9	6.4	4.46	625	2016-04-07
443	12.6	6.4	4.24	420	2016-04-07
299					2016-04-07
454	15.9	5.87	3.82	488	2016-04-07
553	17.3	4.49	3.51	517	2016-04-07
424					2016-04-07
643	23.2	4.13	3.47	446	2016-04-07
484	18.6	5.54	3.96	451	2016-04-07
89	20.5	4.51	3.89	516	2016-04-07
150	22.2	5.81	4.42	557	2016-04-07
645	20.9	5.56	3.74	470	2016-04-07
38					2016-04-07
457	30.5	5.62	3.86	510	2016-04-07
248	23.9	5.22	3.84	511	2016-04-07
170	16	5.81	4.21	559	2016-04-07
640	15.9	6.11	4.03	523	2016-04-07
60	18.7	5.91	3.74	525	2016-04-07
106	20.7	5.89	4.03	439	2016-04-07
379	15.5	5.73	3.99	597	2016-04-07
12	21.3	5.18	3.86	464	2016-04-07
451	13.1	3.84	2.77	420	2016-04-07
517					2016-04-07
636	19.8	5.01	3.93	483	2016-04-07
634	15.3	4.79	4.31	550	2016-04-07
631					2016-04-07
629	15.7	6.51	3.65	501	2016-04-07
627	28.9	5.02	3.83	525	2016-04-07
624	20	4.7	3.83	488	2016-04-07
622	14.4	7.47	4.46	592	2016-04-07
618	15.9	6.56	4.23	499	2016-04-07
579					2016-04-07
140					2016-04-07
523					2016-04-07
211					2016-04-07
375					2016-04-07
234					2016-04-07
359					2016-04-07
121					2016-04-07
392					2016-04-07
278					2016-04-07
346					2016-04-07
135	20.7	6.21	4.26	558	2016-04-07
132	18.6	4.6	3.58	460	2016-04-07
212	28.5	5.09	3.86	477	2016-04-07
535	23.2	4.83	3.47	486	2016-04-07
257					2016-04-07
453					2016-04-07
58					2016-04-07
323					2016-04-07
602					2016-04-07
485					2016-04-07
205					2016-04-07
114					2016-04-07
540					2016-04-07
411					2016-04-07
246					2016-04-07
528					2016-04-07
441					2016-04-07
63					2016-04-07
546					2016-04-07
287	20.2	4.92	3.97	438	2016-04-07
492					2016-04-07
45					2016-04-07
247	16.9	5.53	4.1	403	2016-04-07
336					2016-04-07
400					2016-04-07
435					2016-04-07
177	15.4	4.65	3.91	502	2016-04-07
616					2016-04-07
1					2016-04-07
393					2016-04-07
518					2016-04-07
251					2016-04-07
548	25.3	4.74	3.84	458	2016-04-07
447	21.2	5.72	4.02	595	2016-04-07
491					2016-04-07
158	27.7	4.89	3.86	532	2016-04-07
427					2016-04-07
418	12.5	6.3	4.3	506	2016-04-07
603					2016-04-07
604	9.8	5.53	4.37	486	2016-04-07
107					2016-04-07
396	10.1	6.78	4.16	536	2016-04-07
608					2016-04-07
92					2016-04-07
310					2016-04-07
356	11.4	3.7	4.08	493	2016-04-07
169					2016-04-07
470					2016-04-07
104					2016-04-07
426					2016-04-07
425					2016-04-07
480					2016-04-07
499					2016-04-07
433					2016-04-07
450					2016-04-07
6					2016-04-07
423					2016-04-07
335					2016-04-07
590					2016-04-07
407					2016-04-07
354					2016-04-07
118	17.8	5.36	3.58	589	2016-04-07
311	26.8	5.71	4.13	553	2016-04-07
421	16.2	6.58	4.12	630	2016-04-07
314	10.3	4.36	3.27	474	2016-04-07
245	8.7	6.98	4.02	759	2016-04-07
614	21.3	4.46	3.37	559	2016-04-07
95					2016-04-07
204	14	5.45	4.01	549	2016-04-07
78	19.7	3.86	3.55	557	2016-04-07
428	12.7	6.03	4.03	481	2016-04-07
414	12.1	4.33	4.02	388	2016-04-07
139	13.2	5.48	4.25	435	2016-04-07
178					2016-04-07
625	11.5	5.73	3.87	428	2016-04-07
598	15.2	4.22	3.61	393	2016-04-07
597	11.4	5.18	4.07	348	2016-04-07
208					2016-04-07
343					2016-04-07
64	12.4	5.16	3.84	379	2016-04-07
[truncated: 7,115 more rows]

## Sheet: May 2016
Animal Number	Day Production	Fat indication	Protein indication	Weight	Date
27	14.7	6.36	4.31	530	2016-05-01
47					2016-05-01
125	18.1	6.04	4.37	619	2016-05-01
144	26.6	5.18	4.08	549	2016-05-01
253	19.8	5.53	4.1	507	2016-05-01
274	22.3	4.32	3.65	522	2016-05-01
192					2016-05-01
200					2016-05-01
361	18.8	6.49	4.47	585	2016-05-01
11					2016-05-01
466	20.3	6.53	5.07	550	2016-05-01
483	18.1	5.33	3.94	462	2016-05-01
632	12.4	5.8	4.37	558	2016-05-01
380	18.4	6.39	5.02	508	2016-05-01
8					2016-05-01
181	21.3	6.01	3.93	521	2016-05-01
24	29.2	5.76	4	614	2016-05-01
36	17.3	5.76	4.09	559	2016-05-01
37	8.1	7.82	5.39	472	2016-05-01
134	25.9	5.43	4.05	633	2016-05-01
209	22.6	5.9	3.89	580	2016-05-01
281	22.8	4.5	3.76	576	2016-05-01
269	14.3	6.51	4.36	548	2016-05-01
306					2016-05-01
54	17	5.54	4.16	492	2016-05-01
537	16.8	4.5	4.12	480	2016-05-01
113	12.7	6.04	3.9	395	2016-05-01
403					2016-05-01
188	20.9	4.65	4.07	563	2016-05-01
146					2016-05-01
384					2016-05-01
494					2016-05-01
183	24.2	5.05	3.99	577	2016-05-01
86	20.9	5.83	4.05	507	2016-05-01
543	18.3	6.03	4.22	574	2016-05-01
544					2016-05-01
547	15.1	6.25	3.98	509	2016-05-01
241					2016-05-01
410	16.9	5.23	3.75	591	2016-05-01
342	20.5	4.49	3.39	670	2016-05-01
173	20.3	3.58	3.99	514	2016-05-01
504	13.3	5.2	4.53	492	2016-05-01
179					2016-05-01
389					2016-05-01
2	15.3	5.68	4.08	485	2016-05-01
66	14.7	4.76	3.62	542	2016-05-01
119	18.2	4.97	4.1	458	2016-05-01
366	24.3	4.52	4.14	502	2016-05-01
369	14.1	5.01	4.21	489	2016-05-01
556	17.4	5.36	4.08	480	2016-05-01
291	13.9	7.16	4.52	556	2016-05-01
352	24.3	4.91	3.77	499	2016-05-01
292	10.5	6.13	4.97	429	2016-05-01
100	18	5.04	3.86	603	2016-05-01
490	10.7	7.45	4.23	617	2016-05-01
42	13.8	5.65	4.62	553	2016-05-01
406	17.9	6.13	4.04	548	2016-05-01
239	17.4	4.7	4	491	2016-05-01
103	12.9	6.94	4.67	501	2016-05-01
508					2016-05-01
195					2016-05-01
219					2016-05-01
267					2016-05-01
382					2016-05-01
477					2016-05-01
377					2016-05-01
216	15	5.15	4.22	448	2016-05-01
344					2016-05-01
74	14.4	4.75	4.01	573	2016-05-01
319					2016-05-01
90	25.2	4.91	3.98	602	2016-05-01
98	18.8	5.33	3.68	441	2016-05-01
236					2016-05-01
265	17.7	6.19	4.1	451	2016-05-01
193	11.6	5.09	4.17	491	2016-05-01
288					2016-05-01
233	11.4	5.29	3.94	515	2016-05-01
437					2016-05-01
385	11.9	5.77	4.47	653	2016-05-01
443	14.1	6.56	4.31	417	2016-05-01
299					2016-05-01
454	15.9	6.08	3.95	501	2016-05-01
553	21	4.46	3.6	509	2016-05-01
424					2016-05-01
643	23.9	4.3	3.49	455	2016-05-01
484	18	5.81	4.08	485	2016-05-01
89	22.3	4.36	3.94	512	2016-05-01
150	17.6	5.84	4.41	565	2016-05-01
645	17.7	5.93	3.98	498	2016-05-01
38					2016-05-01
457	25.8	5.45	3.9	518	2016-05-01
248	21.6	5.38	3.87	522	2016-05-01
170	15.4	6.36	4.4	579	2016-05-01
640	15.9	5.44	4.25	537	2016-05-01
60	16.8	5.54	3.49	535	2016-05-01
106	19.6	6.02	4.24	440	2016-05-01
379	14.7	5.66	4.13	604	2016-05-01
12	17.5	5.11	4.11	463	2016-05-01
451	16.3	4.12	3.69	463	2016-05-01
517					2016-05-01
636	22.5	4.98	4.03	484	2016-05-01
634	16	5.55	4.49	571	2016-05-01
631					2016-05-01
629	16.1	7.06	3.75	517	2016-05-01
627	28	5.1	3.94	529	2016-05-01
624	23.5	4.66	3.88	506	2016-05-01
622	12.2	7.08	4.43	560	2016-05-01
618	14.5	5.84	4.6	551	2016-05-01
579					2016-05-01
140					2016-05-01
523					2016-05-01
211					2016-05-01
375					2016-05-01
234					2016-05-01
359					2016-05-01
121					2016-05-01
392					2016-05-01
278					2016-05-01
346					2016-05-01
135	19.5	6.72	4.29	564	2016-05-01
132	20	4.13	3.67	521	2016-05-01
212	27	4.55	4.04	495	2016-05-01
535	22.3	4.43	3.73	512	2016-05-01
257					2016-05-01
453					2016-05-01
58					2016-05-01
323					2016-05-01
602					2016-05-01
485					2016-05-01
205					2016-05-01
114					2016-05-01
540					2016-05-01
411					2016-05-01
246					2016-05-01
528	18.7	5.24	4.45	439	2016-05-01
441					2016-05-01
63					2016-05-01
546					2016-05-01
287	21.9	4.84	3.77	434	2016-05-01
492					2016-05-01
45					2016-05-01
247	19.8	4.31	3.6	410	2016-05-01
336					2016-05-01
400					2016-05-01
435					2016-05-01
177	10.8	4.3	3.68	501	2016-05-01
616					2016-05-01
1	23.4	5	3.92	408	2016-05-01
393					2016-05-01
518					2016-05-01
251	22.3	6.23	4.67	528	2016-05-01
548	22.2	4.31	4.03	465	2016-05-01
447	17.8	5.89	4.07	579	2016-05-01
491	26.9	4.17	3.84	454	2016-05-01
158	23.3	5.05	4.04	551	2016-05-01
427	23.4	4.95	4.27	391	2016-05-01
418					2016-05-01
603	18.4	4.95	4.89	416	2016-05-01
604					2016-05-01
107	15.7	4.14	3.63	499	2016-05-01
396					2016-05-01
608					2016-05-01
92					2016-05-01
310					2016-05-01
356	13.1	4.42	4.24	495	2016-05-01
169					2016-05-01
470					2016-05-01
104					2016-05-01
426					2016-05-01
425					2016-05-01
480					2016-05-01
499					2016-05-01
433	22	5.4	4.75	435	2016-05-01
450					2016-05-01
6					2016-05-01
423					2016-05-01
335					2016-05-01
590					2016-05-01
407					2016-05-01
354					2016-05-01
118	17.6	4.94	3.53	585	2016-05-01
311	24.9	4.92	4.23	566	2016-05-01
421	17.7	6.63	4.23	639	2016-05-01
314					2016-05-01
245					2016-05-01
614	22.5	4.57	3.67	547	2016-05-01
95					2016-05-01
204	14.3	5.32	4.22	573	2016-05-01
78	20.6	3.97	3.69	561	2016-05-01
428	13.3	5.95	4.16	484	2016-05-01
414	11.4	4.74	4.05	398	2016-05-01
139	16.1	5.31	4.14	427	2016-05-01
178					2016-05-01
625	12.3	5.98	4.01	456	2016-05-01
598	13.2	5.08	3.73	385	2016-05-01
597	12.6	4.68	4.35	355	2016-05-01
208					2016-05-01
343					2016-05-01
64	14.2	4.86	3.91	381	2016-05-01
117	16.9	4.65	3.79	505	2016-05-01
180	15.9	5.18	4.02	468	2016-05-01
145	16.1	3.71	3.84	427	2016-05-01
633	12.5	4.85	3.85	526	2016-05-01
46	12.9	5.03	3.85	523	2016-05-01
277	15.7	5.09	4.21	391	2016-05-01
21					2016-05-01
264	16.2	4.56	3.94	432	2016-05-01
596	16.6	4.07	3.39	442	2016-05-01
175					2016-05-01
650	14.8	5.01	3.76	447	2016-05-01
142					2016-05-01
161	16.6	3.91	3.8	502	2016-05-01
194					2016-05-01
573					2016-05-01
599	12.3	4.44	3.76	425	2016-05-01
565	14.6	4.45	3.5	437	2016-05-01
82	14.3	4.89	4.04	507	2016-05-01
4	12.5	5.4	3.8	399	2016-05-01
476					2016-05-01
430					2016-05-01
498	13.4	5.75	4.25	488	2016-05-01
76	14.1	5.7	4.26	475	2016-05-01
84	12.7	5.96	4.09	468	2016-05-01
18					2016-05-01
532					2016-05-01
124					2016-05-01
32					2016-05-01
459					2016-05-01
355					2016-05-01
413	15.1	5.37	4.3	468	2016-05-01
545					2016-05-01
474					2016-05-01
404					2016-05-01
112	12.6	5.89	3.56	469	2016-05-01
91					2016-05-01
268	15.2	4.18	3.79	430	2016-05-01
232	13	4.65	4.19	524	2016-05-01
153	18.7	4.33	4.14	480	2016-05-01
109	12.4	6.24	4.18	451	2016-05-01
40					2016-05-01
61	19	5.25	4.16	468	2016-05-01
68	17.1	4.79	3.76	414	2016-05-01
286					2016-05-01
394					2016-05-01
52	15.2	6.02	4.46	524	2016-05-01
617	6.6	3.86	4.03	539	2016-05-01
460	22.1	4.19	3.6	533	2016-05-01
307	19.8	5.26	3.63	547	2016-05-01
99	13.4	5.48	4.11	482	2016-05-01
273	17.7	4.3	3.55	453	2016-05-01
295	14.7	4.65	4.25	460	2016-05-01
541					2016-05-01
22					2016-05-01
589	14	5.66	4.03	520	2016-05-01
159	13.4	5.73	4.59	412	2016-05-01
14					2016-05-01
519					2016-05-01
398					2016-05-01
258					2016-05-01
87					2016-05-01
214					2016-05-01
360					2016-05-01
405					2016-05-01
338					2016-05-01
235	14.9	5.22	3.84	446	2016-05-01
254	19.2	4.82	3.73	504	2016-05-01
432					2016-05-01
201					2016-05-01
143					2016-05-01
189	17.1	4.29	3.8	449	2016-05-01
15					2016-05-01
231					2016-05-01
283					2016-05-01
69					2016-05-01
348					2016-05-01
133					2016-05-01
164	15.6	4.74	3.84	419	2016-05-01
167					2016-05-01
111					2016-05-01
71					2016-05-01
402					2016-05-01
644					2016-05-01
10					2016-05-01
472					2016-05-01
35					2016-05-01
65					2016-05-01
429					2016-05-01
171					2016-05-01
294					2016-05-01
381	18.4	4.3	3.66	456	2016-05-01
458					2016-05-01
101	12	5.1	3.8	363	2016-05-01
70	20.5	4.32	3.86	440	2016-05-01
79					2016-05-01
431	18.7	4.15	3.38	371	2016-05-01
347					2016-05-01
641					2016-05-01
151					2016-05-01
530	14.5	4.41	3.86	352	2016-05-01
495					2016-05-01
7					2016-05-01
574					2016-05-01
318					2016-05-01
88					2016-05-01
526					2016-05-01
298					2016-05-01
324					2016-05-01
225					2016-05-01
449					2016-05-01
27	14.6	6.49	4.38	520	2016-05-02
47					2016-05-02
125	17	6.28	4.42	592	2016-05-02
144	26.8	4.87	4.06	540	2016-05-02
253	20.2	5.68	4.15	536	2016-05-02
274	22.4	4.22	3.64	519	2016-05-02
192					2016-05-02
200					2016-05-02
361	23.2	6.27	4.53	578	2016-05-02
11					2016-05-02
466	21.1	5.78	4.99	553	2016-05-02
483	19.7	5.24	3.91	471	2016-05-02
632	12.8	5.46	4.36	561	2016-05-02
380	20.1	6.19	4.95	505	2016-05-02
8					2016-05-02
181	21.6	5.89	3.9	522	2016-05-02
24	29	5.47	3.95	618	2016-05-02
36	17.5	5.95	4.11	562	2016-05-02
37	10.4	6.85	5.42	454	2016-05-02
134	25.6	5.2	4.05	611	2016-05-02
209	27	6.18	3.96	578	2016-05-02
281	20.8	5.68	3.72	587	2016-05-02
269	15.1	6.53	4.38	545	2016-05-02
306					2016-05-02
54	18.3	5.67	4.21	496	2016-05-02
537	17.1	4.83	4.14	472	2016-05-02
113	13.3	5.7	3.93	393	2016-05-02
403					2016-05-02
188	20.1	4.71	4.13	560	2016-05-02
146					2016-05-02
384					2016-05-02
494					2016-05-02
183	25	5.07	3.95	581	2016-05-02
86	22	5.67	4.11	506	2016-05-02
543	17.9	5.7	4.26	579	2016-05-02
544					2016-05-02
547	14.8	6.05	3.99	551	2016-05-02
241					2016-05-02
410	16.4	5.55	3.76	586	2016-05-02
342	20.2	4.43	3.31	685	2016-05-02
173	22.4	3.76	3.99	508	2016-05-02
504	13.8	5.06	4.56	483	2016-05-02
179					2016-05-02
389					2016-05-02
2	15.2	5.61	4.11	487	2016-05-02
66	14.9	5.08	3.67	534	2016-05-02
119	19.2	5.2	4.1	461	2016-05-02
366	25.4	4.63	4.16	503	2016-05-02
369	14.3	4.86	4.2	492	2016-05-02
556	19.9	5.96	4.07	495	2016-05-02
291	13.9	7.11	4.54	556	2016-05-02
352	23.8	5.06	3.89	513	2016-05-02
292	11	5.9	4.94	449	2016-05-02
100	17.2	5	3.88	603	2016-05-02
490	8.9	7.22	4.27	615	2016-05-02
42	15.1	5.56	4.67	552	2016-05-02
406	17.9	6.01	4.14	560	2016-05-02
239	17.6	4.46	4.03	488	2016-05-02
103	12.5	6.39	4.58	506	2016-05-02
508					2016-05-02
195					2016-05-02
219					2016-05-02
267					2016-05-02
382					2016-05-02
477					2016-05-02
377					2016-05-02
216	15.1	5.13	4.25	458	2016-05-02
344					2016-05-02
74	12.2	4.79	4.01	566	2016-05-02
319					2016-05-02
90	24.5	5	3.94	589	2016-05-02
98	20.4	5.01	3.65	418	2016-05-02
236					2016-05-02
265	17.6	6.36	4.11	469	2016-05-02
193	11.6	5.36	4.2	482	2016-05-02
288					2016-05-02
233	13	5.64	3.94	502	2016-05-02
437					2016-05-02
385	11.3	6.14	4.51	644	2016-05-02
443	13	6.5	4.37	417	2016-05-02
299					2016-05-02
454	16.5	6.03	4	503	2016-05-02
553	20.7	4.41	3.65	506	2016-05-02
424					2016-05-02
643	23	4.39	3.55	456	2016-05-02
484	19	5.97	4.13	485	2016-05-02
89	20.8	4.46	3.96	505	2016-05-02
150	19	5.54	4.35	641	2016-05-02
645	18.3	5.93	4.05	472	2016-05-02
38					2016-05-02
457	25.6	5.72	3.98	520	2016-05-02
248	21.8	5.4	3.94	505	2016-05-02
170	14.9	6.36	4.43	569	2016-05-02
640	16.1	5.54	4.28	546	2016-05-02
60	17.1	5.85	3.65	511	2016-05-02
106	19.5	6.01	4.27	443	2016-05-02
379	16.1	5.58	4.12	593	2016-05-02
12	19.2	5.41	4.12	465	2016-05-02
451	17.1	4.16	3.64	463	2016-05-02
517					2016-05-02
636	24	4.77	3.98	484	2016-05-02
634	16.5	5.46	4.51	565	2016-05-02
631					2016-05-02
629	16.2	6.72	3.74	527	2016-05-02
627	27.6	4.72	3.96	511	2016-05-02
624	25.6	4.64	3.86	507	2016-05-02
622	12.3	7.02	4.44	571	2016-05-02
618	15.3	5.89	4.62	545	2016-05-02
579					2016-05-02
140					2016-05-02
523					2016-05-02
211					2016-05-02
375					2016-05-02
234					2016-05-02
359					2016-05-02
121					2016-05-02
392					2016-05-02
278					2016-05-02
346					2016-05-02
135	18.9	6.85	4.35	566	2016-05-02
132	18.8	4.31	3.71	518	2016-05-02
212	26.8	4.36	4.09	497	2016-05-02
535	22.3	4.99	3.75	524	2016-05-02
257					2016-05-02
453					2016-05-02
58					2016-05-02
323					2016-05-02
602					2016-05-02
485					2016-05-02
205					2016-05-02
114					2016-05-02
540					2016-05-02
411					2016-05-02
246					2016-05-02
528	18.4	5.71	4.38	419	2016-05-02
441					2016-05-02
63					2016-05-02
546					2016-05-02
287	22	4.68	3.87	440	2016-05-02
492					2016-05-02
45					2016-05-02
247	20	4.24	3.67	419	2016-05-02
336					2016-05-02
400					2016-05-02
435					2016-05-02
177	11	4.38	3.69	509	2016-05-02
616					2016-05-02
1	24.6	4.92	3.89	407	2016-05-02
393					2016-05-02
518					2016-05-02
251	23.3	5.88	4.68	520	2016-05-02
548	23	5.15	4.04	459	2016-05-02
447	19.2	5.67	4.13	599	2016-05-02
491	28.9	4.21	3.83	455	2016-05-02
158	25.8	4.7	4.01	546	2016-05-02
427	23.3	5.23	4.27	373	2016-05-02
418					2016-05-02
603	18.9	4.96	4.77	492	2016-05-02
604					2016-05-02
107	16.5	4.88	3.63	500	2016-05-02
396					2016-05-02
608					2016-05-02
92					2016-05-02
310					2016-05-02
356	12.6	4.45	4.2	498	2016-05-02
169					2016-05-02
470					2016-05-02
104					2016-05-02
426					2016-05-02
425					2016-05-02
480					2016-05-02
499					2016-05-02
433	21.1	5.63	4.69	431	2016-05-02
450					2016-05-02
6					2016-05-02
423					2016-05-02
335					2016-05-02
590					2016-05-02
407					2016-05-02
354					2016-05-02
118	16.9	5.1	3.53	570	2016-05-02
311	25	4.88	4.25	554	2016-05-02
421	17.2	6.57	4.23	635	2016-05-02
314					2016-05-02
245					2016-05-02
614	23	4.54	3.64	540	2016-05-02
95					2016-05-02
204	14	5.29	4.23	562	2016-05-02
78	21.3	3.96	3.68	565	2016-05-02
428	13.4	6	4.16	479	2016-05-02
414	11.6	4.79	4.04	397	2016-05-02
139	16.9	5.41	4.17	420	2016-05-02
178					2016-05-02
625	13.4	6.07	4.03	422	2016-05-02
598	12.9	4.56	3.74	386	2016-05-02
597	13.5	4.88	4.35	356	2016-05-02
208					2016-05-02
343					2016-05-02
64	14.1	4.62	3.93	381	2016-05-02
117	17.3	4.77	3.78	508	2016-05-02
180	16	5.11	3.98	466	2016-05-02
145	16.2	3.66	3.88	426	2016-05-02
633	12.2	5.24	3.81	523	2016-05-02
46	13.3	4.81	3.87	514	2016-05-02
277	15.6	5.06	4.25	381	2016-05-02
21					2016-05-02
264	16.8	4.78	3.99	423	2016-05-02
596	17.2	4.23	3.46	441	2016-05-02
175					2016-05-02
650	15	5.04	3.78	443	2016-05-02
142					2016-05-02
161	16	3.92	3.88	528	2016-05-02
194					2016-05-02
573					2016-05-02
599	12.1	4.54	3.8	420	2016-05-02
565	14.9	4.47	3.54	472	2016-05-02
82	14.6	5.15	4.1	461	2016-05-02
4	12.9	5.43	3.83	397	2016-05-02
476					2016-05-02
430					2016-05-02
498	14.3	5.54	4.25	489	2016-05-02
76	15.3	5.6	4.19	478	2016-05-02
84	12.8	6.09	4.1	462	2016-05-02
18					2016-05-02
532					2016-05-02
124					2016-05-02
32					2016-05-02
459					2016-05-02
355					2016-05-02
413	15.3	5.49	4.36	469	2016-05-02
545					2016-05-02
474					2016-05-02
404					2016-05-02
112	5.2	5.23	3.78	471	2016-05-02
91					2016-05-02
268	15.5	4.27	3.82	435	2016-05-02
232	12.6	4.88	4.18	528	2016-05-02
153	17.1	4.61	4.21	484	2016-05-02
109	13.6	6.16	4.19	452	2016-05-02
40					2016-05-02
61	19.3	5.04	4.2	467	2016-05-02
68	17.5	4.27	3.74	422	2016-05-02
286					2016-05-02
394					2016-05-02
52	15.1	6.04	4.48	520	2016-05-02
617	8.4	4.4	3.88	549	2016-05-02
460	22.4	4.29	3.59	523	2016-05-02
307	19.8	5.18	3.62	525	2016-05-02
99	9.8	5.42	4.19	455	2016-05-02
273	17.1	4.32	3.56	447	2016-05-02
295	14.7	4.79	4.28	454	2016-05-02
541					2016-05-02
22					2016-05-02
589	14.1	5.69	4.05	490	2016-05-02
159	14	5.83	4.59	404	2016-05-02
14					2016-05-02
519					2016-05-02
398					2016-05-02
258					2016-05-02
87					2016-05-02
214					2016-05-02
360					2016-05-02
405					2016-05-02
338					2016-05-02
235	15.9	5.07	3.71	445	2016-05-02
254	19.8	4.91	3.71	503	2016-05-02
432					2016-05-02
201					2016-05-02
143					2016-05-02
189	16.4	4.38	3.82	451	2016-05-02
15					2016-05-02
231					2016-05-02
283					2016-05-02
69					2016-05-02
348					2016-05-02
133					2016-05-02
164	16.4	5	3.98	420	2016-05-02
167					2016-05-02
111					2016-05-02
71					2016-05-02
402					2016-05-02
644					2016-05-02
10					2016-05-02
472					2016-05-02
35					2016-05-02
65					2016-05-02
429					2016-05-02
171					2016-05-02
294					2016-05-02
381	18.5	4.19	3.71	448	2016-05-02
458					2016-05-02
101	13.3	5.51	3.99	375	2016-05-02
70	24.1	4.8	3.9	429	2016-05-02
79					2016-05-02
431	19.1	4.25	3.41	367	2016-05-02
347					2016-05-02
641					2016-05-02
151					2016-05-02
530	15.2	4.43	3.77	385	2016-05-02
495					2016-05-02
7					2016-05-02
574					2016-05-02
318					2016-05-02
88					2016-05-02
526					2016-05-02
298					2016-05-02
324					2016-05-02
225					2016-05-02
449					2016-05-02
512					2016-05-02
368					2016-05-02
50					2016-05-02
473					2016-05-02
244					2016-05-02
329					2016-05-02
549					2016-05-02
373					2016-05-02
27	14.3	6.48	4.36	526	2016-05-03
47					2016-05-03
125	17.4	6.36	4.4	621	2016-05-03
144	27.2	4.7	4.15	530	2016-05-03
253	21.3	5.59	4.09	510	2016-05-03
274	21	4.53	3.7	505	2016-05-03
192					2016-05-03
200					2016-05-03
361	21.3	6.17	4.6	595	2016-05-03
11					2016-05-03
466	22	6.05	4.96	544	2016-05-03
483	20.1	5.28	3.92	464	2016-05-03
632	14.1	5.21	4.3	574	2016-05-03
380	19.2	6.32	4.97	512	2016-05-03
8					2016-05-03
181	22	5.84	3.88	518	2016-05-03
24	29.9	5.72	3.95	599	2016-05-03
36	18.2	5.77	4.11	554	2016-05-03
37	12.7	2.8	5.06	466	2016-05-03
134	26.3	5.42	4.1	623	2016-05-03
209	24.9	5.95	4.02	576	2016-05-03
281	19.9	5.38	3.8	572	2016-05-03
269	14.3	6.35	4.38	546	2016-05-03
306					2016-05-03
54	18.2	5.56	4.23	498	2016-05-03
537	18.2	5.14	4.15	472	2016-05-03
113	13.8	5.73	3.94	394	2016-05-03
403					2016-05-03
188	19.5	4.37	4.14	559	2016-05-03
146					2016-05-03
384					2016-05-03
494					2016-05-03
183	25.1	5.36	3.98	581	2016-05-03
86	22.6	5.11	4.19	500	2016-05-03
543	18.1	5.72	4.26	560	2016-05-03
544					2016-05-03
547	14.7	6.09	3.98	510	2016-05-03
241					2016-05-03
410	17.1	5.75	3.78	588	2016-05-03
342	20.6	4.08	3.35	701	2016-05-03
173	24.7	4.85	3.9	528	2016-05-03
504	13.8	5.38	4.59	481	2016-05-03
179					2016-05-03
389					2016-05-03
2	14.3	5.56	4.13	486	2016-05-03
66	14	5.18	3.7	534	2016-05-03
119	18.5	5.29	4.1	465	2016-05-03
366	25.8	4.83	4.17	514	2016-05-03
369	15.5	4.78	4.17	490	2016-05-03
556	20.3	5.72	4.04	504	2016-05-03
291	13.3	6.94	4.55	573	2016-05-03
352	24.9	4.89	3.88	513	2016-05-03
292	11.6	5.84	4.88	441	2016-05-03
100	17.2	4.74	3.85	620	2016-05-03
490	8.3	8.43	4.35	614	2016-05-03
42	14.4	5.81	4.68	547	2016-05-03
406	17.3	5.96	4.12	551	2016-05-03
239	17.4	4.35	4	498	2016-05-03
103	12.9	6.47	4.57	506	2016-05-03
508					2016-05-03
195					2016-05-03
219					2016-05-03
267					2016-05-03
382					2016-05-03
477					2016-05-03
377					2016-05-03
216	14.9	5.41	4.3	458	2016-05-03
344					2016-05-03
74	12.2	4.91	4	561	2016-05-03
319					2016-05-03
90	23.7	5.12	3.97	597	2016-05-03
98	21.2	4.98	3.65	423	2016-05-03
236					2016-05-03
265	19.7	6.08	4.19	464	2016-05-03
193	12.1	5.6	4.23	484	2016-05-03
288					2016-05-03
233	14.7	5.74	3.95	534	2016-05-03
437					2016-05-03
385	11.7	6.31	4.57	650	2016-05-03
443	13.6	6.81	4.42	410	2016-05-03
299					2016-05-03
454	16.7	5.92	4	494	2016-05-03
553	20.5	4.15	3.63	511	2016-05-03
424					2016-05-03
643	21.7	4.35	3.6	454	2016-05-03
484	19.2	5.8	4.11	478	2016-05-03
89	20.9	4.59	4.03	510	2016-05-03
150	7	5.77	4.49	521	2016-05-03
645	18.4	5.9	4.1	474	2016-05-03
38					2016-05-03
457	26.7	5.64	3.95	522	2016-05-03
248	22	5.16	3.9	513	2016-05-03
170	14.3	6.12	4.4	574	2016-05-03
640	16.8	5.63	4.3	526	2016-05-03
60	18.6	5.94	3.74	537	2016-05-03
106	20.3	6.23	4.31	441	2016-05-03
379	15.3	5.32	4.13	594	2016-05-03
12	20.3	5.89	4.08	473	2016-05-03
451	16.8	4.46	3.69	463	2016-05-03
517					2016-05-03
636	25.2	4.87	4	487	2016-05-03
634	16.8	5.36	4.53	562	2016-05-03
631					2016-05-03
629	16.3	6.79	3.79	520	2016-05-03
627	27.3	4.19	3.99	517	2016-05-03
624	24.7	4.49	3.88	517	2016-05-03
622	13.1	7.32	4.44	564	2016-05-03
618	15.4	5.79	4.63	548	2016-05-03
579					2016-05-03
140					2016-05-03
523					2016-05-03
211					2016-05-03
375					2016-05-03
234					2016-05-03
359					2016-05-03
121					2016-05-03
392					2016-05-03
278					2016-05-03
346					2016-05-03
135	18.5	6.9	4.45	562	2016-05-03
132	19	4.42	3.73	532	2016-05-03
212	26.5	4.63	4.15	497	2016-05-03
535	23.2	5.06	3.68	546	2016-05-03
257					2016-05-03
453					2016-05-03
58					2016-05-03
323					2016-05-03
602					2016-05-03
485					2016-05-03
205					2016-05-03
114					2016-05-03
540					2016-05-03
411					2016-05-03
246					2016-05-03
528	19.3	5.49	4.3	422	2016-05-03
441					2016-05-03
63					2016-05-03
546					2016-05-03
287	22.8	4.86	3.93	437	2016-05-03
492					2016-05-03
45					2016-05-03
247	20.3	4.38	3.71	493	2016-05-03
336					2016-05-03
400					2016-05-03
435					2016-05-03
177	12.6	4.77	3.78	500	2016-05-03
616					2016-05-03
1	24.7	5.01	3.97	413	2016-05-03
393					2016-05-03
518					2016-05-03
251	23.5	5.59	4.64	522	2016-05-03
548	23.1	4.99	4.09	454	2016-05-03
447	19.2	5.66	4.17	573	2016-05-03
491	28.4	4.54	3.91	455	2016-05-03
158	25.7	5.18	4.02	550	2016-05-03
427	23.2	4.92	4.33	374	2016-05-03
418					2016-05-03
603	19	3.96	4.54	421	2016-05-03
604					2016-05-03
107	18	5.1	3.64	492	2016-05-03
396					2016-05-03
608					2016-05-03
92					2016-05-03
310					2016-05-03
356	13.9	4.71	4.17	510	2016-05-03
169					2016-05-03
470					2016-05-03
104					2016-05-03
426					2016-05-03
425					2016-05-03
480					2016-05-03
499					2016-05-03
433	20.8	5.53	4.57	434	2016-05-03
450					2016-05-03
6					2016-05-03
423					2016-05-03
335					2016-05-03
590					2016-05-03
407					2016-05-03
354					2016-05-03
118	18.4	5.26	3.55	577	2016-05-03
311	26.4	5.28	4.28	558	2016-05-03
421	17.2	6.42	4.22	645	2016-05-03
314					2016-05-03
245					2016-05-03
614	22	4.59	3.59	546	2016-05-03
95					2016-05-03
204	13.4	5.54	4.25	561	2016-05-03
78	21.2	4.06	3.68	571	2016-05-03
428	13.8	6.15	4.18	487	2016-05-03
414	13.4	5.1	4.01	399	2016-05-03
139	15.1	5.49	4.17	428	2016-05-03
178					2016-05-03
625	13.5	6.18	4.08	431	2016-05-03
598	13.3	4.63	3.77	389	2016-05-03
597	14	4.98	4.32	351	2016-05-03
208					2016-05-03
343					2016-05-03
64	14	4.52	3.92	384	2016-05-03
117	17.6	4.81	3.8	510	2016-05-03
180	16	5.27	3.98	466	2016-05-03
145	16.3	3.65	3.88	423	2016-05-03
633	13.9	4.79	3.74	529	2016-05-03
46	13.4	4.82	3.89	526	2016-05-03
277	16.1	4.95	4.27	382	2016-05-03
21					2016-05-03
264	16.1	4.82	4.02	424	2016-05-03
596	17	4.32	3.5	429	2016-05-03
175					2016-05-03
650	15.3	5.05	3.77	455	2016-05-03
142					2016-05-03
161	16.2	4.03	3.88	501	2016-05-03
194					2016-05-03
573					2016-05-03
599	12.2	4.33	3.76	424	2016-05-03
565	15.6	4.56	3.59	438	2016-05-03
82	14.7	5.2	4.13	459	2016-05-03
4	12.5	5.33	3.83	396	2016-05-03
476					2016-05-03
430					2016-05-03
498	14.2	5.78	4.27	481	2016-05-03
76	14	5.64	4.17	469	2016-05-03
84	12.1	6.26	4.12	495	2016-05-03
18					2016-05-03
532					2016-05-03
124					2016-05-03
32					2016-05-03
459					2016-05-03
355					2016-05-03
413	15.7	5.8	4.33	459	2016-05-03
545					2016-05-03
474					2016-05-03
404					2016-05-03
112	8.1	5.55	3.59	459	2016-05-03
91					2016-05-03
268	15.8	4.46	3.86	434	2016-05-03
232	15.3	5.36	4.23	537	2016-05-03
153	18.1	4.54	4.25	479	2016-05-03
109	13.6	6.06	4.22	450	2016-05-03
40					2016-05-03
61	19.5	4.97	4.24	467	2016-05-03
68	18	4.63	3.67	420	2016-05-03
286					2016-05-03
394					2016-05-03
52	15.7	6.04	4.46	519	2016-05-03
617	11.5	4.8	3.82	559	2016-05-03
460	23.1	3.98	3.62	538	2016-05-03
307	20	5.09	3.65	531	2016-05-03
99	8.9	5.46	4.13	476	2016-05-03
273	17.2	4.14	3.54	453	2016-05-03
295	14.4	4.85	4.29	458	2016-05-03
541					2016-05-03
22					2016-05-03
589	14.8	5.76	4.05	501	2016-05-03
159	13.6	5.8	4.61	408	2016-05-03
14					2016-05-03
519					2016-05-03
398					2016-05-03
258					2016-05-03
87					2016-05-03
214					2016-05-03
360					2016-05-03
405					2016-05-03
338					2016-05-03
235	15.8	4.94	3.77	442	2016-05-03
254	20.7	5.1	3.75	492	2016-05-03
432					2016-05-03
201					2016-05-03
143					2016-05-03
189	17	4.74	3.85	445	2016-05-03
15					2016-05-03
231					2016-05-03
283					2016-05-03
69					2016-05-03
348					2016-05-03
133					2016-05-03
164	16.6	5.23	4.07	420	2016-05-03
167					2016-05-03
111					2016-05-03
71					2016-05-03
402					2016-05-03
644					2016-05-03
10					2016-05-03
472					2016-05-03
35					2016-05-03
65					2016-05-03
429					2016-05-03
171					2016-05-03
294					2016-05-03
381	18.7	4.12	3.76	448	2016-05-03
458					2016-05-03
101	19.7	5.47	3.94	371	2016-05-03
70	26.3	5.01	3.88	430	2016-05-03
79					2016-05-03
431	19.4	4.46	3.42	372	2016-05-03
347					2016-05-03
641					2016-05-03
151					2016-05-03
530	16	4.15	3.77	366	2016-05-03
495					2016-05-03
7					2016-05-03
574					2016-05-03
318					2016-05-03
88					2016-05-03
526					2016-05-03
298					2016-05-03
324					2016-05-03
225					2016-05-03
449					2016-05-03
512					2016-05-03
368					2016-05-03
50					2016-05-03
473					2016-05-03
244					2016-05-03
329					2016-05-03
549					2016-05-03
373					2016-05-03
27	13.7	6.54	4.32	530	2016-05-04
47					2016-05-04
125	17.4	6.4	4.37	612	2016-05-04
144	27.1	4.67	4.19	529	2016-05-04
253	21.8	5.51	4.1	529	2016-05-04
274	20.7	4.6	3.73	487	2016-05-04
192					2016-05-04
200	19.2	6.82	5.81		2016-05-04
361	21.9	6.19	4.61	573	2016-05-04
11					2016-05-04
466	22.1	5.96	4.81	546	2016-05-04
483	18.4	5.27	4.02	472	2016-05-04
632	13.4	5.48	4.33	566	2016-05-04
380	20	6.18	4.89	519	2016-05-04
8					2016-05-04
181	22	6.1	3.96	518	2016-05-04
24	30.5	5.47	4	613	2016-05-04
36	18	5.87	4.14	565	2016-05-04
37	13.3	2.99	4.81	478	2016-05-04
134	26.7	5.19	4.05	637	2016-05-04
209	26.1	5.81	4.05	573	2016-05-04
281	20.2	5.11	3.83	580	2016-05-04
269	14.7	6.43	4.38	543	2016-05-04
306					2016-05-04
54	18.7	5.55	4.29	505	2016-05-04
537	17.3	4.83	4.18	470	2016-05-04
113	14.3	5.94	3.95	397	2016-05-04
403					2016-05-04
188	20.4	4.5	4.18	560	2016-05-04
146					2016-05-04
384					2016-05-04
494					2016-05-04
183	24.5	5.44	3.99	590	2016-05-04
86	23	4.86	4.22	500	2016-05-04
543	18.5	5.98	4.25	570	2016-05-04
544					2016-05-04
547	15.1	6.29	3.94	519	2016-05-04
241					2016-05-04
410	16.7	6.07	3.79	578	2016-05-04
342	20.4	4.09	3.3	676	2016-05-04
173	24.5	4.43	3.86	544	2016-05-04
504	13.8	5.34	4.61	484	2016-05-04
179					2016-05-04
389					2016-05-04
2	18.2	5.73	4.18	497	2016-05-04
66	12.3	5.42	3.72	528	2016-05-04
119	18.8	5.08	4.09	463	2016-05-04
366	24.8	5.05	4.2	508	2016-05-04
369	14.9	4.87	4.15	476	2016-05-04
556	20.2	5.38	4.14	509	2016-05-04
291	13.6	7	4.53	554	2016-05-04
352	25.3	5.14	3.9	521	2016-05-04
292	12.2	6.03	4.88	439	2016-05-04
100	17	4.75	3.88	601	2016-05-04
490	10.3	8.41	4.24	616	2016-05-04
42	14.5	6.22	4.75	542	2016-05-04
406	18.1	6.15	4.11	557	2016-05-04
239	17.1	4.42	4.01	501	2016-05-04
103	12.6	6.36	4.57	509	2016-05-04
508					2016-05-04
195					2016-05-04
219					2016-05-04
267					2016-05-04
382					2016-05-04
477					2016-05-04
377					2016-05-04
216	15.3	5.49	4.3	454	2016-05-04
344					2016-05-04
74	11.4	5.06	3.99	559	2016-05-04
319					2016-05-04
90	23.4	5.25	4.01	606	2016-05-04
98	21.1	5.25	3.69	476	2016-05-04
236					2016-05-04
265	20.2	6.07	4.21	478	2016-05-04
193	11.2	5.62	4.27	484	2016-05-04
288					2016-05-04
233	15.3	5.41	4.01	517	2016-05-04
437					2016-05-04
385	11.6	6.11	4.61	641	2016-05-04
443	13.5	7.02	4.4	415	2016-05-04
299					2016-05-04
454	17.1	6.13	3.98	510	2016-05-04
553	21.2	4.14	3.62	510	2016-05-04
424					2016-05-04
643	22.5	4.25	3.55	461	2016-05-04
484	17.2	6.1	4.21	482	2016-05-04
89	20.7	4.52	3.99	517	2016-05-04
150	11.5	6.1	4.42	541	2016-05-04
645	17.9	5.69	4.1	471	2016-05-04
38					2016-05-04
457	27.7	5.59	3.96	512	2016-05-04
248	21.8	4.92	3.92	520	2016-05-04
170	15.4	6.14	4.4	576	2016-05-04
640	16.6	5.79	4.34	539	2016-05-04
60	18.9	5.74	3.74	526	2016-05-04
106	20.3	5.86	4.31	438	2016-05-04
379	16.2	5.06	4.1	626	2016-05-04
12	17.1	5.37	4.09	465	2016-05-04
451	17.5	4.59	3.76	463	2016-05-04
517					2016-05-04
636	25.5	4.45	4.01	481	2016-05-04
634	15.2	5.78	4.52	561	2016-05-04
631					2016-05-04
629	16.4	6.76	3.83	520	2016-05-04
627	28.1	4.02	3.98	516	2016-05-04
624	25.5	4.39	3.9	497	2016-05-04
622	13.1	7.29	4.42	564	2016-05-04
618	15.9	5.95	4.64	546	2016-05-04
579					2016-05-04
140					2016-05-04
523					2016-05-04
211					2016-05-04
375					2016-05-04
234					2016-05-04
359					2016-05-04
121					2016-05-04
392					2016-05-04
278					2016-05-04
346					2016-05-04
135	20.4	6.7	4.49	561	2016-05-04
132	20.2	4.47	3.75	508	2016-05-04
212	27	4.56	4.22	497	2016-05-04
535	23.5	4.45	3.72	511	2016-05-04
257					2016-05-04
453					2016-05-04
58					2016-05-04
323					2016-05-04
602					2016-05-04
485					2016-05-04
205					2016-05-04
114					2016-05-04
540					2016-05-04
411					2016-05-04
246					2016-05-04
528	19.1	5.45	4.27	420	2016-05-04
441					2016-05-04
63					2016-05-04
546					2016-05-04
287	23.3	4.81	3.95	443	2016-05-04
492					2016-05-04
45					2016-05-04
247	19	4.31	3.74	431	2016-05-04
336					2016-05-04
400					2016-05-04
435					2016-05-04
177	12.8	4.65	3.82	495	2016-05-04
616					2016-05-04
1	24.6	5.05	3.91	417	2016-05-04
393					2016-05-04
518					2016-05-04
251	22.8	5.4	4.57	523	2016-05-04
548	23.7	5.27	4.18	466	2016-05-04
447	18.3	5.66	4.19	592	2016-05-04
491	26.8	4.21	3.94	457	2016-05-04
158	25.7	5.3	4.05	528	2016-05-04
427	24	4.69	4.28	374	2016-05-04
418					2016-05-04
603	17.6	3.51	4.47	410	2016-05-04
604					2016-05-04
107	21.8	4.47	3.68	495	2016-05-04
396					2016-05-04
608					2016-05-04
92	4	2.26	5.49		2016-05-04
310					2016-05-04
356	13.3	4.8	4.17	504	2016-05-04
169					2016-05-04
470					2016-05-04
104					2016-05-04
426					2016-05-04
425					2016-05-04
480					2016-05-04
499					2016-05-04
433	20.4	5.33	4.48	434	2016-05-04
450					2016-05-04
6					2016-05-04
423					2016-05-04
335					2016-05-04
590					2016-05-04
407					2016-05-04
354					2016-05-04
118	19	5.41	3.59	583	2016-05-04
311	25.1	4.9	4.3	575	2016-05-04
421	17.8	6.19	4.22	638	2016-05-04
314					2016-05-04
245					2016-05-04
614	22.9	4.59	3.54	539	2016-05-04
95					2016-05-04
204	13.8	5.67	4.22	557	2016-05-04
78	21.6	4.07	3.71	562	2016-05-04
428	13.8	6.28	4.2	486	2016-05-04
414	13	5.05	3.97	402	2016-05-04
139	16	5.47	4.14	424	2016-05-04
178					2016-05-04
625	13.2	6.17	4.09	423	2016-05-04
598	14.3	4.49	3.81	393	2016-05-04
597	13.1	5.14	4.29	354	2016-05-04
208					2016-05-04
343					2016-05-04
64	13.2	4.71	3.96	378	2016-05-04
117	16.3	4.95	3.81	501	2016-05-04
180	15.9	5.21	4.02	476	2016-05-04
145	15.9	3.87	3.92	423	2016-05-04
633	13.1	4.73	3.77	524	2016-05-04
46	12.9	4.96	3.93	522	2016-05-04
277	15.8	5.05	4.3	388	2016-05-04
21					2016-05-04
264	16	4.71	4	425	2016-05-04
596	17.3	4.27	3.5	436	2016-05-04
175					2016-05-04
650	15.2	5.02	3.77	451	2016-05-04
142					2016-05-04
161	16.4	4.27	3.91	519	2016-05-04
194					2016-05-04
573					2016-05-04
599	12.8	4.46	3.74	419	2016-05-04
565	15.3	4.77	3.7	446	2016-05-04
82	14.5	5.28	4.14	459	2016-05-04
4	12.7	5.31	3.83	400	2016-05-04
476					2016-05-04
430					2016-05-04
498	14.2	5.87	4.29	489	2016-05-04
76	14.6	5.76	4.21	477	2016-05-04
84	12.4	6.35	4.07	466	2016-05-04
18					2016-05-04
532					2016-05-04
124					2016-05-04
32					2016-05-04
459					2016-05-04
355					2016-05-04
413	14	5.75	4.33	461	2016-05-04
545					2016-05-04
474					2016-05-04
404					2016-05-04
112	9	6.57	3	456	2016-05-04
91					2016-05-04
268	14.6	4.75	3.85	448	2016-05-04
232	15.4	5.74	4.21	546	2016-05-04
153	17.5	4.53	4.22	474	2016-05-04
109	13.1	6.12	4.26	451	2016-05-04
40					2016-05-04
61	18	4.8	4.26	421	2016-05-04
68	17.6	4.73	3.74	420	2016-05-04
286					2016-05-04
394					2016-05-04
52	15.2	6.04	4.46	524	2016-05-04
617	12.8	5.05	3.81	555	2016-05-04
460					2016-05-04
307	20.8	5.14	3.68	516	2016-05-04
99	12	5.91	3.94	475	2016-05-04
273	17.5	4.16	3.53	455	2016-05-04
295	13.8	5.04	4.3	449	2016-05-04
541					2016-05-04
22					2016-05-04
589	14.2	5.76	4.08	518	2016-05-04
159	13.3	5.38	4.62	415	2016-05-04
14					2016-05-04
519					2016-05-04
398					2016-05-04
258					2016-05-04
87					2016-05-04
214					2016-05-04
360					2016-05-04
405					2016-05-04
338					2016-05-04
235	15.6	4.75	3.85	436	2016-05-04
254	19.9	5.12	3.85	505	2016-05-04
432					2016-05-04
201					2016-05-04
143					2016-05-04
189	16.6	4.57	3.86	445	2016-05-04
15					2016-05-04
231					2016-05-04
283					2016-05-04
69					2016-05-04
348					2016-05-04
133					2016-05-04
164	16.5	5.35	4.1	420	2016-05-04
167					2016-05-04
111					2016-05-04
71					2016-05-04
402					2016-05-04
644					2016-05-04
10					2016-05-04
472					2016-05-04
35					2016-05-04
65					2016-05-04
429					2016-05-04
171					2016-05-04
294					2016-05-04
381	16.8	4	3.83	457	2016-05-04
458					2016-05-04
101	21	5.37	3.94	365	2016-05-04
70	26.2	5.17	3.86	438	2016-05-04
79					2016-05-04
431	19.6	4.88	3.47	365	2016-05-04
347					2016-05-04
641					2016-05-04
151					2016-05-04
530	14.8	4.05	3.8	366	2016-05-04
495					2016-05-04
7					2016-05-04
574					2016-05-04
318					2016-05-04
88					2016-05-04
526					2016-05-04
298					2016-05-04
324					2016-05-04
225					2016-05-04
449					2016-05-04
512					2016-05-04
368					2016-05-04
50					2016-05-04
473					2016-05-04
244					2016-05-04
329					2016-05-04
549					2016-05-04
373					2016-05-04
27	14.5	6.5	4.22	538	2016-05-05
47					2016-05-05
125	17.7	6.43	4.38	623	2016-05-05
144	26.6	4.56	4.16	540	2016-05-05
253	20.5	5.6	4.14	511	2016-05-05
274	21.7	4.57	3.72	511	2016-05-05
192					2016-05-05
200	13.9	7.35	5.81	559	2016-05-05
361	20.6	6.03	4.6	577	2016-05-05
11					2016-05-05
466	22.1	4.98	4.68	537	2016-05-05
483	18.3	5.47	4.04	462	2016-05-05
632	13.4	5.61	4.33	571	2016-05-05
380	19.4	6.54	4.91	518	2016-05-05
8					2016-05-05
181	21.4	6.24	3.99	508	2016-05-05
24	31.9	5.9	3.98	613	2016-05-05
36	18.2	5.96	4.15	552	2016-05-05
37	16.8	3.1	4.56	494	2016-05-05
134	29.3	5.15	4.06	634	2016-05-05
209	25.3	5.55	4.08	573	2016-05-05
281	20.7	5.22	3.84	569	2016-05-05
269	14.4	6.28	4.36	549	2016-05-05
306					2016-05-05
54	18.2	5.5	4.29	502	2016-05-05
537	17	4.97	4.21	471	2016-05-05
113	14.6	6.19	3.94	394	2016-05-05
403					2016-05-05
188	19.5	5.02	4.22	556	2016-05-05
146					2016-05-05
384					2016-05-05
494					2016-05-05
183	24.5	5.22	4	588	2016-05-05
86	23.1	4.99	4.16	503	2016-05-05
543	17.7	6.12	4.26	556	2016-05-05
544					2016-05-05
547	14.4	6.25	3.93	503	2016-05-05
241					2016-05-05
410	16.8	5.94	3.78	558	2016-05-05
342	20.8	4.25	3.3	691	2016-05-05
173	25.2	4.88	3.9	520	2016-05-05
504	13.3	5.58	4.59	489	2016-05-05
179					2016-05-05
389					2016-05-05
2	17.2	5.61	4.18	501	2016-05-05
66	13.4	5.29	3.72	535	2016-05-05
119	18	5.25	4.08	461	2016-05-05
366	23.2	5.15	4.21	495	2016-05-05
369	14.5	4.93	4.17	494	2016-05-05
556	20.6	5.41	4.22	505	2016-05-05
291	14.1	7.02	4.54	567	2016-05-05
352	24.4	5.05	3.83	518	2016-05-05
292	12.7	6.31	4.89	449	2016-05-05
100	16.4	4.72	3.91	605	2016-05-05
490	10.5	7.74	4.12	617	2016-05-05
42	13.7	6.32	4.79	552	2016-05-05
406	17.7	6.04	4.14	559	2016-05-05
239	17.1	4.51	3.98	495	2016-05-05
103	12.1	6.79	4.66	504	2016-05-05
508					2016-05-05
195					2016-05-05
219					2016-05-05
267					2016-05-05
382					2016-05-05
477					2016-05-05
377					2016-05-05
216	15	5.64	4.3	455	2016-05-05
344					2016-05-05
74	11.6	5.09	4	568	2016-05-05
319					2016-05-05
90	25.3	4.93	3.96	576	2016-05-05
98	19.6	5.34	3.75	430	2016-05-05
236					2016-05-05
265	18.8	5.99	4.21	462	2016-05-05
193	10.9	5.54	4.3	487	2016-05-05
288					2016-05-05
233	15.5	5.38	4.08	532	2016-05-05
437					2016-05-05
385	11.8	5.99	4.61	646	2016-05-05
443	13.9	7.03	4.37	409	2016-05-05
299					2016-05-05
454	16.1	5.98	4	490	2016-05-05
553	20.8	4.38	3.66	508	2016-05-05
424					2016-05-05
643	23.7	4.18	3.48	454	2016-05-05
484	17.8	6.13	4.19	478	2016-05-05
89	21.5	4.36	3.95	512	2016-05-05
150	15.4	6.48	4.3	552	2016-05-05
645	18.2	5.71	4.03	470	2016-05-05
38					2016-05-05
457	27	5.54	3.95	520	2016-05-05
248	22.1	5.21	3.9	513	2016-05-05
170	15.4	6.27	4.42	574	2016-05-05
640	16.6	5.59	4.29	543	2016-05-05
60	19.7	5.45	3.73	523	2016-05-05
106	18.2	5.93	4.29	441	2016-05-05
379	15.6	5.65	4.12	598	2016-05-05
12	19.2	5.76	4.09	473	2016-05-05
451	16.4	4.63	3.79	462	2016-05-05
517					2016-05-05
636	24.5	4.33	4.08	475	2016-05-05
634	16.7	6.09	4.5	554	2016-05-05
631					2016-05-05
629	16.7	6.79	3.83	519	2016-05-05
627	28.4	4.5	3.99	522	2016-05-05
624	25.8	4.56	3.89	504	2016-05-05
622	13.6	7.36	4.47	579	2016-05-05
618	16.1	6.34	4.64	546	2016-05-05
579					2016-05-05
140					2016-05-05
523					2016-05-05
211					2016-05-05
375					2016-05-05
234					2016-05-05
359					2016-05-05
121					2016-05-05
392					2016-05-05
278					2016-05-05
346					2016-05-05
135	20.2	6.84	4.48	561	2016-05-05
132	19.8	4.54	3.77	518	2016-05-05
212	27	4.69	4.2	501	2016-05-05
535	21.8	4.64	3.79	527	2016-05-05
257					2016-05-05
453					2016-05-05
58					2016-05-05
323					2016-05-05
602					2016-05-05
485					2016-05-05
205					2016-05-05
114					2016-05-05
540					2016-05-05
411					2016-05-05
246					2016-05-05
528	18.7	5.54	4.26	409	2016-05-05
441					2016-05-05
63					2016-05-05
546					2016-05-05
287	23.2	4.59	3.96	444	2016-05-05
492					2016-05-05
45					2016-05-05
247	19.2	4.58	3.67	427	2016-05-05
336					2016-05-05
400					2016-05-05
435					2016-05-05
177	13.1	4.48	3.86	508	2016-05-05
616					2016-05-05
1	24.4	4.98	3.87	423	2016-05-05
393					2016-05-05
518					2016-05-05
251	23.2	5.49	4.41	525	2016-05-05
548	22.3	5.59	4.18	467	2016-05-05
447	17.8	5.97	4.16	576	2016-05-05
491	27	4.25	3.94	466	2016-05-05
158	24.9	5.45	4.07	556	2016-05-05
427	24.1	5.28	4.17	379	2016-05-05
418					2016-05-05
603	18	3.88	4.33	420	2016-05-05
604					2016-05-05
107	22	4.6	3.68	497	2016-05-05
396					2016-05-05
608					2016-05-05
92	11.8	4.28	5.63	431	2016-05-05
310					2016-05-05
356	12.5	4.86	4.23	502	2016-05-05
169					2016-05-05
470					2016-05-05
104					2016-05-05
426					2016-05-05
425					2016-05-05
480					2016-05-05
499					2016-05-05
433	22.6	4.81	4.37	431	2016-05-05
450					2016-05-05
6					2016-05-05
423					2016-05-05
335					2016-05-05
590					2016-05-05
407					2016-05-05
354					2016-05-05
118	18.3	5.46	3.61	581	2016-05-05
311	24.3	5.08	4.32	558	2016-05-05
421	16.8	6.45	4.25	640	2016-05-05
314					2016-05-05
245					2016-05-05
614	24	4.48	3.48	546	2016-05-05
95					2016-05-05
204	13.1	5.91	4.28	564	2016-05-05
78	21.8	4.08	3.75	560	2016-05-05
428	13.7	6.3	4.21	489	2016-05-05
414	13	4.95	4.05	405	2016-05-05
139	17	5.39	4.12	433	2016-05-05
178					2016-05-05
625	13.4	6.05	4.1	424	2016-05-05
598	14.4	4.6	3.84	391	2016-05-05
597	13.4	4.84	4.33	354	2016-05-05
208					2016-05-05
343					2016-05-05
64	13.6	4.74	3.99	382	2016-05-05
117	17	4.97	3.79	511	2016-05-05
180	16.2	5.03	4	468	2016-05-05
145	16.2	3.92	3.88	424	2016-05-05
633	13.2	4.7	3.82	516	2016-05-05
46	13.2	4.91	3.92	525	2016-05-05
277	16.6	5	4.3	382	2016-05-05
21					2016-05-05
264	16.2	4.58	4.01	424	2016-05-05
596	17.8	4.21	3.5	442	2016-05-05
175					2016-05-05
650	15.2	5.18	3.75	471	2016-05-05
142					2016-05-05
161	17.4	4.38	3.89	521	2016-05-05
194					2016-05-05
573					2016-05-05
599	11.7	4.63	3.76	422	2016-05-05
565	15.4	4.89	3.71	436	2016-05-05
82	15	5.26	4.13	467	2016-05-05
4	12.6	5.15	3.81	405	2016-05-05
476					2016-05-05
430					2016-05-05
498	14	5.87	4.34	492	2016-05-05
76	14.6	5.59	4.2	488	2016-05-05
84	12.6	6.31	4.08	465	2016-05-05
18					2016-05-05
532					2016-05-05
124					2016-05-05
32					2016-05-05
459					2016-05-05
355					2016-05-05
413	14.2	5.87	4.38	468	2016-05-05
545					2016-05-05
474					2016-05-05
404					2016-05-05
112	10.7	5.92	2.86	447	2016-05-05
91					2016-05-05
268	15.5	4.7	3.85	443	2016-05-05
232	15.7	5.85	4.21	531	2016-05-05
153	17.6	4.42	4.16	481	2016-05-05
109	13.3	6.17	4.28	452	2016-05-05
40					2016-05-05
61	17.4	5.42	4.22	454	2016-05-05
68	18.8	4.82	3.81	479	2016-05-05
286					2016-05-05
394					2016-05-05
52	15.2	5.85	4.44	524	2016-05-05
617	13.8	4.82	3.79	549	2016-05-05
460	9.5	3.82	3.65		2016-05-05
307	20.1	5.27	3.67	558	2016-05-05
99	13.3	6.2	3.77	475	2016-05-05
273	17.8	4.25	3.54	450	2016-05-05
295	14.3	5.08	4.28	453	2016-05-05
541					2016-05-05
22					2016-05-05
589	13.9	5.68	4.07	509	2016-05-05
159	13.5	5.57	4.64	411	2016-05-05
14					2016-05-05
519					2016-05-05
398					2016-05-05
258					2016-05-05
87					2016-05-05
214					2016-05-05
360					2016-05-05
405					2016-05-05
338					2016-05-05
235	16	4.81	3.9	437	2016-05-05
254	19.9	5.18	3.93	500	2016-05-05
432					2016-05-05
201					2016-05-05
143					2016-05-05
189	17.2	4.62	3.86	443	2016-05-05
15					2016-05-05
231					2016-05-05
283					2016-05-05
69					2016-05-05
348					2016-05-05
133					2016-05-05
164	13.7	5.5	4.13	420	2016-05-05
167					2016-05-05
111					2016-05-05
71					2016-05-05
402					2016-05-05
644					2016-05-05
10					2016-05-05
472					2016-05-05
35					2016-05-05
65					2016-05-05
429					2016-05-05
171					2016-05-05
294					2016-05-05
381	18.1	3.99	3.77	458	2016-05-05
458					2016-05-05
101	17.7	5.71	4.01	383	2016-05-05
70	17.2	4.89	3.87	416	2016-05-05
79					2016-05-05
431	18.6	4.75	3.52	369	2016-05-05
347					2016-05-05
641					2016-05-05
151					2016-05-05
530	11.5	4.4	3.91	364	2016-05-05
495					2016-05-05
7					2016-05-05
574					2016-05-05
318					2016-05-05
88					2016-05-05
526					2016-05-05
298					2016-05-05
324					2016-05-05
225					2016-05-05
449					2016-05-05
512					2016-05-05
368					2016-05-05
50					2016-05-05
473					2016-05-05
244					2016-05-05
329					2016-05-05
549					2016-05-05
373					2016-05-05
27	14.4	6.69	4.22	516	2016-05-06
47					2016-05-06
125	16.8	6.44	4.41	610	2016-05-06
144	26.5	4.71	4.12	533	2016-05-06
253	20.1	5.82	4.15	524	2016-05-06
274	21.3	4.43	3.7	512	2016-05-06
192					2016-05-06
200	17.8	7.62	5.73	558	2016-05-06
361	16.7	5.92	4.59	598	2016-05-06
11					2016-05-06
466	21.6	5.33	4.56	541	2016-05-06
483	18.2	5.69	3.99	464	2016-05-06
632	12.9	5.62	4.34	561	2016-05-06
380	19.7	6.25	4.87	521	2016-05-06
8					2016-05-06
181	20.7	6.17	3.98	519	2016-05-06
24	31	5.57	3.97	617	2016-05-06
36	17.4	5.76	4.15	559	2016-05-06
37	17.9	3.12	4.43	495	2016-05-06
134	27.6	5.17	4.11	642	2016-05-06
209	25.8	5.51	4.03	576	2016-05-06
281	17.1	5.18	3.83	578	2016-05-06
269	13.8	6.51	4.38	545	2016-05-06
306					2016-05-06
54	18.4	5.43	4.28	497	2016-05-06
537	17.5	5.22	4.22	476	2016-05-06
113	14.1	6.11	3.95	389	2016-05-06
403					2016-05-06
188	19.8	4.97	4.24	562	2016-05-06
146					2016-05-06
384					2016-05-06
494					2016-05-06
183	24.1	5.03	3.9	583	2016-05-06
86	22.9	5.47	4.19	510	2016-05-06
543	17.1	6.04	4.28	546	2016-05-06
544					2016-05-06
547	14.3	6.67	4	511	2016-05-06
241					2016-05-06
410	16.4	5.69	3.83	581	2016-05-06
342	19.7	4.41	3.44	694	2016-05-06
173	23.8	5.04	3.89	530	2016-05-06
504	12.9	5.71	4.56	479	2016-05-06
179					2016-05-06
389					2016-05-06
2	15.4	5.15	4.16	498	2016-05-06
66	13.1	5	3.69	525	2016-05-06
119	18.2	5.36	4.07	459	2016-05-06
366	25.5	4.95	4.14	499	2016-05-06
369	15	4.78	4.14	489	2016-05-06
556	20.7	5.12	4.18	504	2016-05-06
291	13.2	7.28	4.55	562	2016-05-06
352	23.3	4.85	3.83	518	2016-05-06
292	13	5.64	4.77	454	2016-05-06
100	15.2	5	3.96	609	2016-05-06
490	10.4	7.64	4.17	614	2016-05-06
42	13.2	6.6	4.81	537	2016-05-06
406	17.2	6.04	4.11	555	2016-05-06
239	17.1	4.56	3.99	496	2016-05-06
103	11.8	6.63	4.62	532	2016-05-06
508					2016-05-06
195					2016-05-06
219					2016-05-06
267					2016-05-06
382					2016-05-06
477					2016-05-06
377					2016-05-06
216	13.7	5.76	4.29	453	2016-05-06
344					2016-05-06
74	11.6	5.2	4	570	2016-05-06
319					2016-05-06
90	23.2	4.97	3.92	622	2016-05-06
98	21.3	5.26	3.72	426	2016-05-06
236					2016-05-06
265	18.9	5.91	4.21	458	2016-05-06
193	11.2	5.64	4.32	490	2016-05-06
288					2016-05-06
233	14.6	5.36	4.11	525	2016-05-06
437					2016-05-06
385	10.6	6.11	4.57	649	2016-05-06
443	14.1	6.95	4.35	409	2016-05-06
299					2016-05-06
454	16.6	5.84	3.96	499	2016-05-06
553	19.3	4.34	3.7	515	2016-05-06
424					2016-05-06
643	23.8	4.22	3.49	450	2016-05-06
484	17.8	5.92	4.1	478	2016-05-06
89	21.4	4.23	4	518	2016-05-06
150	17.8	6.44	4.25	556	2016-05-06
645	17.9	5.95	3.98	476	2016-05-06
38					2016-05-06
457	26	5.46	3.95	523	2016-05-06
248	21.8	5.38	3.88	516	2016-05-06
170	14.5	6.34	4.42	576	2016-05-06
640	16.8	5.58	4.23	537	2016-05-06
60	18.7	5.34	3.77	535	2016-05-06
106	18.6	5.29	4.18	436	2016-05-06
379	15.4	5.88	4.17	609	2016-05-06
12	19.3	6.2	4.11	466	2016-05-06
451	16.3	4.52	3.78	459	2016-05-06
517					2016-05-06
636	23.3	4.57	4.12	483	2016-05-06
634	16.5	6.05	4.52	559	2016-05-06
631					2016-05-06
629	16.4	6.79	3.84	523	2016-05-06
627	27.9	4.16	3.91	521	2016-05-06
624	26.1	4.57	3.9	513	2016-05-06
622	12.2	7.22	4.47	561	2016-05-06
618	16.3	6.34	4.6	549	2016-05-06
579					2016-05-06
140					2016-05-06
523					2016-05-06
211					2016-05-06
375					2016-05-06
234					2016-05-06
359					2016-05-06
121					2016-05-06
392					2016-05-06
278					2016-05-06
346					2016-05-06
135	18.9	6.65	4.47	552	2016-05-06
132	18.3	4.46	3.81	506	2016-05-06
212	26.6	4.56	4.18	492	2016-05-06
535	24.1	4.57	3.77	514	2016-05-06
257					2016-05-06
453					2016-05-06
58					2016-05-06
323					2016-05-06
602					2016-05-06
485					2016-05-06
205					2016-05-06
114					2016-05-06
540					2016-05-06
411					2016-05-06
246					2016-05-06
528	16.6	5.13	4.27	433	2016-05-06
441					2016-05-06
63					2016-05-06
546					2016-05-06
287	23.2	4.79	3.9	445	2016-05-06
492					2016-05-06
45					2016-05-06
247	20.1	4.52	3.63	422	2016-05-06
336					2016-05-06
400					2016-05-06
435					2016-05-06
177	13.1	4.41	3.83	508	2016-05-06
616					2016-05-06
1	25.6	5.11	3.87	422	2016-05-06
393					2016-05-06
518					2016-05-06
251	22.8	5.39	4.34	523	2016-05-06
548	22.9	5.36	4.13	468	2016-05-06
447	16.9	5.88	4.04	583	2016-05-06
491	25.8	4.23	3.94	459	2016-05-06
158	24.6	5.23	4.07	550	2016-05-06
427	23.1	4.63	4.14	365	2016-05-06
418					2016-05-06
603	19	4.6	4.2	418	2016-05-06
604					2016-05-06
107	21.5	4.67	3.64	496	2016-05-06
396					2016-05-06
608					2016-05-06
92	11	4.75	5.56	445	2016-05-06
310					2016-05-06
356	12.9	4.83	4.16	509	2016-05-06
169					2016-05-06
470					2016-05-06
104					2016-05-06
426					2016-05-06
425					2016-05-06
480					2016-05-06
499					2016-05-06
433	23.2	4.88	4.29	430	2016-05-06
450					2016-05-06
6					2016-05-06
423					2016-05-06
335					2016-05-06
590					2016-05-06
407					2016-05-06
354					2016-05-06
118	17.9	5.41	3.65	572	2016-05-06
311	25.4	4.77	4.25	563	2016-05-06
421	16.5	6.6	4.23	628	2016-05-06
314					2016-05-06
245					2016-05-06
614	23	4.57	3.49	542	2016-05-06
95					2016-05-06
204	13.4	5.94	4.24	532	2016-05-06
78	20.8	4.09	3.78	572	2016-05-06
428	13.8	6.24	4.19	483	2016-05-06
414	12.4	4.85	4.1	405	2016-05-06
139	17	5.24	4.12	420	2016-05-06
178					2016-05-06
625	12.6	6.19	4.07	429	2016-05-06
598	14.3	4.54	3.83	375	2016-05-06
597	13.6	4.86	4.32	343	2016-05-06
208					2016-05-06
343					2016-05-06
64	14	4.64	3.98	382	2016-05-06
117	15.6	4.92	3.79	505	2016-05-06
180	16.1	5.06	3.97	471	2016-05-06
145	16.1	4.03	3.87	415	2016-05-06
633	13.3	4.97	3.86	521	2016-05-06
46	13	4.73	3.94	523	2016-05-06
277	16.2	5.08	4.3	380	2016-05-06
21					2016-05-06
264	16	4.81	4	424	2016-05-06
596	17.3	4.2	3.5	438	2016-05-06
175					2016-05-06
650	15.6	5.35	3.75	444	2016-05-06
142					2016-05-06
161	16.8	4.34	3.84	512	2016-05-06
194					2016-05-06
573					2016-05-06
599	11.8	4.68	3.76	427	2016-05-06
565	16.2	4.75	3.67	440	2016-05-06
82	15	5.23	4.15	461	2016-05-06
4	12.7	5.17	3.81	402	2016-05-06
476					2016-05-06
430					2016-05-06
498	13.2	6.09	4.37	485	2016-05-06
76	14.9	5.63	4.21	469	2016-05-06
84	12.7	6.22	4.05	465	2016-05-06
18					2016-05-06
532					2016-05-06
124					2016-05-06
32					2016-05-06
459					2016-05-06
355					2016-05-06
413	14.5	5.87	4.4	463	2016-05-06
545					2016-05-06
474					2016-05-06
404					2016-05-06
112	11.6	4.64	2.78	450	2016-05-06
91					2016-05-06
268	16.1	4.76	3.83	443	2016-05-06
232	15.1	5.42	4.21	535	2016-05-06
153	18.2	4.42	4.16	481	2016-05-06
109	13.4	6.21	4.26	453	2016-05-06
40					2016-05-06
61	19.7	5.6	4.09	463	2016-05-06
68	17.2	4.29	3.82	428	2016-05-06
286					2016-05-06
394					2016-05-06
52	15.2	5.88	4.45	524	2016-05-06
617	13.8	4.52	3.78	543	2016-05-06
460	18.2	4.16	3.57	522	2016-05-06
307	20	5.26	3.65	546	2016-05-06
99	13.4	6.13	4.02	473	2016-05-06
273	17.7	4.3	3.55	448	2016-05-06
295	14.7	5.01	4.24	451	2016-05-06
541					2016-05-06
22					2016-05-06
589	13.7	5.64	4.06	509	2016-05-06
159	13	5.69	4.63	414	2016-05-06
14					2016-05-06
519					2016-05-06
398					2016-05-06
258					2016-05-06
87					2016-05-06
214					2016-05-06
360					2016-05-06
405					2016-05-06
338					2016-05-06
235	15.7	4.82	3.87	433	2016-05-06
254	20.5	5.2	3.89	518	2016-05-06
432					2016-05-06
201					2016-05-06
143					2016-05-06
189	17	4.88	3.87	441	2016-05-06
15					2016-05-06
231					2016-05-06
283					2016-05-06
69					2016-05-06
348					2016-05-06
133					2016-05-06
164	15.6	5.52	3.99	420	2016-05-06
167					2016-05-06
111					2016-05-06
71					2016-05-06
402					2016-05-06
644					2016-05-06
10					2016-05-06
472					2016-05-06
35					2016-05-06
65					2016-05-06
429					2016-05-06
171					2016-05-06
294					2016-05-06
381	18.6	3.95	3.72	468	2016-05-06
458					2016-05-06
101	17.8	5.44	4.01	380	2016-05-06
70	23.1	4.75	3.84	441	2016-05-06
79					2016-05-06
431	18.4	4.46	3.49	370	2016-05-06
347					2016-05-06
641					2016-05-06
151					2016-05-06
530	15.1	4.82	3.85	362	2016-05-06
495					2016-05-06
7					2016-05-06
574					2016-05-06
318					2016-05-06
88					2016-05-06
526					2016-05-06
298					2016-05-06
324					2016-05-06
225					2016-05-06
449					2016-05-06
512					2016-05-06
368					2016-05-06
50					2016-05-06
473					2016-05-06
244					2016-05-06
329					2016-05-06
549					2016-05-06
373					2016-05-06
27	14.3	6.88	4.31	522	2016-05-07
47					2016-05-07
125	16.2	6.54	4.4	621	2016-05-07
144	22.5	4.61	4.13	528	2016-05-07
253	20.5	5.4	4.04	537	2016-05-07
274	21.5	4.6	3.67	509	2016-05-07
192					2016-05-07
200	20.2	6.97	5.48	562	2016-05-07
361	17	5.86	4.58	588	2016-05-07
11					2016-05-07
466	21.7	5.83	4.43	542	2016-05-07
483	17.7	5.51	3.94	468	2016-05-07
632	13.6	5.64	4.32	565	2016-05-07
380	20.1	6.31	4.82	511	2016-05-07
8					2016-05-07
181	20.6	6.56	3.92	516	2016-05-07
24	29.8	6	4.04	616	2016-05-07
36	17.3	5.46	4.1	564	2016-05-07
37	17.6	3.28	4.35	512	2016-05-07
134	26	4.94	4.13	618	2016-05-07
209	23.6	5.52	4.03	577	2016-05-07
281	18.7	4.52	3.81	585	2016-05-07
269	13.4	6.81	4.39	567	2016-05-07
306					2016-05-07
54	17.6	5.48	4.29	504	2016-05-07
537	16.8	5.24	4.22	473	2016-05-07
113	12.7	6.09	3.98	393	2016-05-07
403					2016-05-07
188	18.6	4.69	4.22	550	2016-05-07
146					2016-05-07
384					2016-05-07
494					2016-05-07
183	24	5.18	4	580	2016-05-07
86	21.9	5.77	4.22	515	2016-05-07
543	17.9	6.24	4.27	565	2016-05-07
544					2016-05-07
547	14.4	6.5	3.93	507	2016-05-07
241					2016-05-07
410	17	5.72	3.85	575	2016-05-07
342	19.7	4.59	3.39	681	2016-05-07
173	23.3	4.69	3.9	522	2016-05-07
504	12.7	6.12	4.59	480	2016-05-07
179					2016-05-07
389					2016-05-07
2	16	5.55	4.25	508	2016-05-07
66	14.3	5.2	3.67	539	2016-05-07
119	18.5	5.29	4.06	473	2016-05-07
366	25.3	5.12	4.17	501	2016-05-07
369	14.8	4.95	4.16	499	2016-05-07
556	18.8	4.56	4.15	511	2016-05-07
291	12.6	7.43	4.58	564	2016-05-07
352	24.8	5.08	3.8	548	2016-05-07
292	13.5	5.71	4.76	452	2016-05-07
100	15.6	5.06	3.97	614	2016-05-07
490					2016-05-07
42	13.4	6.3	4.74	546	2016-05-07
406	17.4	6.1	4.1	553	2016-05-07
239	15.9	4.68	4	493	2016-05-07
103					2016-05-07
508					2016-05-07
195					2016-05-07
219					2016-05-07
267					2016-05-07
382					2016-05-07
477					2016-05-07
377					2016-05-07
216	14.8	5.8	4.3	458	2016-05-07
344					2016-05-07
74	11.8	5.27	4.01	564	2016-05-07
319					2016-05-07
90	22.8	4.87	3.94	609	2016-05-07
98	20.1	5.24	3.71	432	2016-05-07
236					2016-05-07
265	19.2	6.06	4.19	453	2016-05-07
193	10.3	5.78	4.32	496	2016-05-07
288					2016-05-07
233	12.9	5.43	4.12	541	2016-05-07
437					2016-05-07
385	11	6.22	4.55	640	2016-05-07
443	14	6.85	4.36	411	2016-05-07
299					2016-05-07
454	15.7	5.97	3.91	499	2016-05-07
553	19.2	4.4	3.69	508	2016-05-07
424					2016-05-07
643	23.4	4.18	3.45	461	2016-05-07
484	17.7	5.69	4.07	471	2016-05-07
89	20.1	4.27	4	556	2016-05-07
150	18.5	6.47	4.49	566	2016-05-07
645	18.1	6.03	3.97	470	2016-05-07
38					2016-05-07
457	26.7	5.25	3.95	511	2016-05-07
248	21.3	5.21	3.91	512	2016-05-07
170	15.4	6.21	4.42	575	2016-05-07
640	16.8	5.53	4.21	542	2016-05-07
60	19.8	5.3	3.79	540	2016-05-07
106	17.5	4.67	4.08	437	2016-05-07
379	15.8	5.76	4.17	594	2016-05-07
12	14.7	6.03	4.06	454	2016-05-07
451	16.8	4.34	3.75	465	2016-05-07
517					2016-05-07
636	23	4.47	4.11	478	2016-05-07
634	15.9	6	4.55	558	2016-05-07
631					2016-05-07
629	15.8	6.77	3.85	524	2016-05-07
627	26.8	4.82	3.97	525	2016-05-07
[truncated: 7,954 more rows]

## Sheet: June 2016
Animal Number	Day Production	Fat indication	Protein indication	Weight	Date
27					2016-06-01
47					2016-06-01
125	14.6	5.88	4.14	624	2016-06-01
144	27.2	4.83	3.93	539	2016-06-01
253	20.9	5.31	3.81	538	2016-06-01
274	19.7	4.48	3.75	499	2016-06-01
192					2016-06-01
200	30.5	4.82	4.09	641	2016-06-01
361	22.4	5.54	4.46	575	2016-06-01
11					2016-06-01
466	27.6	5.56	3.97	538	2016-06-01
483	15.7	5.54	3.96	458	2016-06-01
632	11.4	5.66	4.14	595	2016-06-01
380	24	6.15	4.53	520	2016-06-01
8	5.7	2.36	5.78		2016-06-01
181	20.5	6.12	3.78	498	2016-06-01
24	29	5.69	3.98	635	2016-06-01
36	15.2	5.36	4.04	578	2016-06-01
37	27.6	4.29	3.62	540	2016-06-01
134	25.8	4.53	3.77	637	2016-06-01
209	19.4	5.9	3.92	535	2016-06-01
281	20.1	5.04	3.68	561	2016-06-01
269	12.2	6.76	4.4	556	2016-06-01
306	15	4.75	4.68	518	2016-06-01
54	19.1	5.06	4.25	501	2016-06-01
537	17.3	5.03	3.9	471	2016-06-01
113	13.1	5.5	3.74	397	2016-06-01
403					2016-06-01
188	17.6	4.57	4.1	551	2016-06-01
146					2016-06-01
384					2016-06-01
494	21.2	2.76	4.41	489	2016-06-01
183	23.9	5.71	3.75	604	2016-06-01
86	22.4	5.14	4.06	515	2016-06-01
543	18.5	5.9	4.07	578	2016-06-01
544					2016-06-01
547	11.7	6.13	3.95	519	2016-06-01
241					2016-06-01
410	16.2	5.82	3.89	594	2016-06-01
342	19.4	4.1	3.31	691	2016-06-01
173	25.7	4.42	3.76	521	2016-06-01
504	12.7	5.52	4.36	484	2016-06-01
179					2016-06-01
389					2016-06-01
2	12.6	5.39	3.98	518	2016-06-01
66	9.7	5.11	3.44	549	2016-06-01
119	16.9	4.79	4.09	470	2016-06-01
366	22.9	4.64	4.04	493	2016-06-01
369	12.7	5.28	4.05	506	2016-06-01
556	18.8	5.57	4.1	511	2016-06-01
291					2016-06-01
352	22.7	4.82	3.67	517	2016-06-01
292	19.5	5.16	4.21	459	2016-06-01
100					2016-06-01
490					2016-06-01
42	11.8	5.73	4.68	549	2016-06-01
406	11.5	5.94	4.05	561	2016-06-01
239	15.5	5.22	3.7	508	2016-06-01
103					2016-06-01
508					2016-06-01
195					2016-06-01
219					2016-06-01
267					2016-06-01
382					2016-06-01
477					2016-06-01
377					2016-06-01
216	14	5.26	4.18	464	2016-06-01
344	25.8	4.67	4	558	2016-06-01
74	11.7	5.27	4.08	575	2016-06-01
319					2016-06-01
90	23.1	4.25	3.99	614	2016-06-01
98	20.4	4.69	3.47	426	2016-06-01
236					2016-06-01
265	19.6	5.36	4.14	452	2016-06-01
193					2016-06-01
288					2016-06-01
233	11.7	5.03	4.07	540	2016-06-01
437					2016-06-01
385	6.8	5.77	4.57	664	2016-06-01
443	13.5	5.96	3.91	388	2016-06-01
299					2016-06-01
454	15	4.8	3.61	521	2016-06-01
553	19.7	4.51	3.56	503	2016-06-01
424					2016-06-01
643	23.7	4.03	3.37	463	2016-06-01
484	19.5	4.83	3.58	491	2016-06-01
89	20.7	4.08	3.93	517	2016-06-01
150	15.3	5.77	4.18	556	2016-06-01
645	17.1	5.58	3.65	469	2016-06-01
38	30	3.99	3.96	500	2016-06-01
457	22.1	5.32	3.97	506	2016-06-01
248	19	5.27	3.86	507	2016-06-01
170	14.2	6.03	4.31	573	2016-06-01
640	16.2	5.14	3.78	562	2016-06-01
60	20.6	5.16	3.56	532	2016-06-01
106	14.7	4.76	3.98	433	2016-06-01
379	13	5.89	4.08	614	2016-06-01
12	20.7	5.28	3.93	468	2016-06-01
451	16	4.16	3.72	459	2016-06-01
517	21.7	4.61	4.55	411	2016-06-01
636	22.3	4.13	3.64	479	2016-06-01
634	15.3	5.4	4.43	566	2016-06-01
631					2016-06-01
629	16.5	5.87	3.66	527	2016-06-01
627	25.1	4.41	3.94	520	2016-06-01
624	24.7	4.19	3.76	506	2016-06-01
622	11.9	6.74	4.29	560	2016-06-01
618	15.9	6.05	4.1	516	2016-06-01
579					2016-06-01
140					2016-06-01
523					2016-06-01
211					2016-06-01
375					2016-06-01
234					2016-06-01
359					2016-06-01
121					2016-06-01
392					2016-06-01
278					2016-06-01
346					2016-06-01
135	17.8	5.61	4.25	538	2016-06-01
132	19.2	3.97	3.71	520	2016-06-01
212	25	5.67	4.17	499	2016-06-01
535	20.8	4.91	3.64	514	2016-06-01
257					2016-06-01
453					2016-06-01
58					2016-06-01
323					2016-06-01
602					2016-06-01
485					2016-06-01
205					2016-06-01
114					2016-06-01
540					2016-06-01
411					2016-06-01
246					2016-06-01
528	20.1	5.48	4.01	445	2016-06-01
441					2016-06-01
63					2016-06-01
546					2016-06-01
287	24.9	5.02	3.88	446	2016-06-01
492					2016-06-01
45					2016-06-01
247	19.4	4.32	3.71	484	2016-06-01
336					2016-06-01
400	22.2	3.83	4.23	442	2016-06-01
435					2016-06-01
177	12.8	3.93	3.91	529	2016-06-01
616	17.3	5.12	4.16	510	2016-06-01
1	24	4.27	3.7	429	2016-06-01
393					2016-06-01
518					2016-06-01
251	31.3	4.49	3.69	508	2016-06-01
548	22.8	5.17	4.04	482	2016-06-01
447	16.3	5.53	3.96	590	2016-06-01
491	26.2	3.96	3.75	465	2016-06-01
158	23.4	5.95	4.02	540	2016-06-01
427	24.4	3.64	3.91	378	2016-06-01
418					2016-06-01
603	25.8	3.95	3.54	419	2016-06-01
604					2016-06-01
107	22.8	3.84	3.62	496	2016-06-01
396					2016-06-01
608					2016-06-01
92	18	4.13	3.88	465	2016-06-01
310					2016-06-01
356	13.1	4.79	4.17	513	2016-06-01
169					2016-06-01
470					2016-06-01
104					2016-06-01
426					2016-06-01
425					2016-06-01
480					2016-06-01
499					2016-06-01
433	26.7	4.91	3.91	434	2016-06-01
450					2016-06-01
6					2016-06-01
423					2016-06-01
335					2016-06-01
590					2016-06-01
407					2016-06-01
354					2016-06-01
118	12.7	5.19	3.64	559	2016-06-01
311	24.1	4.58	3.85	538	2016-06-01
421					2016-06-01
314					2016-06-01
245					2016-06-01
614	22.5	4.36	3.39	540	2016-06-01
95					2016-06-01
204	11.6	5.55	4.23	582	2016-06-01
78					2016-06-01
428	15.7	5.51	4.06	490	2016-06-01
414	11	4.79	4	418	2016-06-01
139	16.6	5.34	3.94	429	2016-06-01
178					2016-06-01
625	12.2	5.98	3.86	437	2016-06-01
598	16.1	4.51	3.63	397	2016-06-01
597	10.8	3.93	4.45	353	2016-06-01
208					2016-06-01
343					2016-06-01
64					2016-06-01
117	15.1	4.73	3.61	526	2016-06-01
180	15.4	4.57	3.76	466	2016-06-01
145	15	3.22	3.7	414	2016-06-01
633					2016-06-01
46	11.8	4.43	3.93	543	2016-06-01
277	16	5.12	4.15	389	2016-06-01
21					2016-06-01
264	15.2	4.77	3.89	435	2016-06-01
596	16.3	3.95	3.4	456	2016-06-01
175					2016-06-01
650	14.9	4.51	3.52	433	2016-06-01
142					2016-06-01
161	16.8	4.05	3.81	534	2016-06-01
194					2016-06-01
573					2016-06-01
599	10.2	4.66	3.59	422	2016-06-01
565	16	5.24	3.59	448	2016-06-01
82	14.6	4.83	3.93	474	2016-06-01
4	12.5	5.4	3.67	417	2016-06-01
476					2016-06-01
430					2016-06-01
498	13.2	6.04	4.27	493	2016-06-01
76	14.2	5.28	4.14	477	2016-06-01
84	11.8	5.87	3.94	475	2016-06-01
18					2016-06-01
532					2016-06-01
124					2016-06-01
32					2016-06-01
459					2016-06-01
355					2016-06-01
413	14.2	5.54	4.4	480	2016-06-01
545					2016-06-01
474					2016-06-01
404					2016-06-01
112	17	3.96	3.06	487	2016-06-01
91					2016-06-01
268	17.3	4.14	3.56	450	2016-06-01
232	16	5.72	4.05	537	2016-06-01
153	18.8	4.46	4.03	482	2016-06-01
109	14.8	5.58	4.01	450	2016-06-01
40					2016-06-01
61	19.3	4.57	3.98	480	2016-06-01
68	18.1	4.81	3.72	430	2016-06-01
286					2016-06-01
394					2016-06-01
52	14	5.81	4.36	532	2016-06-01
617	12.2	4.1	3.89	556	2016-06-01
460	12	5.5	3.49	475	2016-06-01
307	17.9	4.86	3.47	562	2016-06-01
99	12.7	5.7	4.01	487	2016-06-01
273	16.1	4.27	3.48	444	2016-06-01
295	14	4.94	4.06	463	2016-06-01
541					2016-06-01
22					2016-06-01
589	12.9	5.2	3.84	516	2016-06-01
159	14	5.23	4.33	408	2016-06-01
14					2016-06-01
519					2016-06-01
398					2016-06-01
258					2016-06-01
87					2016-06-01
214					2016-06-01
360					2016-06-01
405					2016-06-01
338					2016-06-01
235	15	4.64	3.8	450	2016-06-01
254	22.4	4.75	3.66	527	2016-06-01
432					2016-06-01
201					2016-06-01
143					2016-06-01
189	17.3	4.65	3.79	491	2016-06-01
15					2016-06-01
231					2016-06-01
283					2016-06-01
69					2016-06-01
348					2016-06-01
133					2016-06-01
164	13.1	5.16	3.92	431	2016-06-01
167					2016-06-01
111					2016-06-01
71					2016-06-01
402					2016-06-01
644					2016-06-01
10					2016-06-01
472					2016-06-01
35					2016-06-01
65					2016-06-01
429					2016-06-01
171					2016-06-01
294					2016-06-01
381	17.1	4.56	3.5	464	2016-06-01
458					2016-06-01
101	19	4.71	3.86	392	2016-06-01
70	23.7	4.74	3.83	442	2016-06-01
79					2016-06-01
431	19.1	4.88	3.73	384	2016-06-01
347					2016-06-01
641					2016-06-01
151					2016-06-01
530	14.8	4.36	3.79	382	2016-06-01
495					2016-06-01
7					2016-06-01
574					2016-06-01
318					2016-06-01
88					2016-06-01
526					2016-06-01
298					2016-06-01
438					2016-06-01
468					2016-06-01
230					2016-06-01
564					2016-06-01
560					2016-06-01
324	13.3	4.28	4.04	472	2016-06-01
259					2016-06-01
13					2016-06-01
225	5.7	5.81	5.04	386	2016-06-01
449	14.8	5.98	4.68	402	2016-06-01
512	4.2	2.54	3.97	421	2016-06-01
368	10.1	4.68	4.2		2016-06-01
50	8.4	5.78	4.77	406	2016-06-01
473	9	5.58	4.45	355	2016-06-01
244	8.8	5.04	4.47	362	2016-06-01
329	4.2	2.57	4.19	395	2016-06-01
549	11.9	6.34	4.83	521	2016-06-01
373	3.9	1.14	3.96	437	2016-06-01
280					2016-06-01
185					2016-06-01
228					2016-06-01
620					2016-06-01
27					2016-06-02
47					2016-06-02
125	14.4	6.17	4.18	619	2016-06-02
144	27.4	4.86	3.88	544	2016-06-02
253	21.6	5.03	3.83	540	2016-06-02
274	18.7	4.55	3.7	516	2016-06-02
192					2016-06-02
200	31.4	4.69	4.14	564	2016-06-02
361	17.6	6.09	4.41	573	2016-06-02
11					2016-06-02
466	26.3	5.79	3.97	544	2016-06-02
483	16.3	5.39	3.89	465	2016-06-02
632	12.3	5.8	4.16	596	2016-06-02
380	23.7	5.89	4.48	531	2016-06-02
8	11.2	4.73	5.8	513	2016-06-02
181	20.3	6.13	3.76	496	2016-06-02
24	27.7	6.24	4.02	605	2016-06-02
36	15	5.53	4.09	570	2016-06-02
37	30	4.36	3.57	534	2016-06-02
134	24.3	4.6	3.78	650	2016-06-02
209	21.8	5.84	3.92	543	2016-06-02
281	20.5	5.51	3.68	562	2016-06-02
269	12.1	6.59	4.37	562	2016-06-02
306	16.5	4.61	4.58	511	2016-06-02
54	18.7	5.06	4.24	471	2016-06-02
537	17.8	5.09	3.91	466	2016-06-02
113	13.7	5.45	3.72	391	2016-06-02
403					2016-06-02
188	18.8	4.69	4.06	561	2016-06-02
146					2016-06-02
384					2016-06-02
494	21.8	3.09	4.45	489	2016-06-02
183	23.9	5.19	3.75	606	2016-06-02
86	22.1	5.17	4.05	505	2016-06-02
543	17.2	5.98	4.11	575	2016-06-02
544					2016-06-02
547	11.8	6.11	3.89	521	2016-06-02
241					2016-06-02
410	15.9	6.05	3.9	598	2016-06-02
342	19.8	4.07	3.3	685	2016-06-02
173	25.4	4.42	3.75	527	2016-06-02
504	12.7	5.31	4.4	484	2016-06-02
179					2016-06-02
389					2016-06-02
2	13.6	5.39	3.89	510	2016-06-02
66	9.7	4.86	3.42	538	2016-06-02
119	17.1	5.1	4.12	468	2016-06-02
366	24	4.58	3.94	493	2016-06-02
369	13.4	5.07	4.05	510	2016-06-02
556	18.8	5.33	4.08	519	2016-06-02
291					2016-06-02
352	24.6	4.74	3.65	527	2016-06-02
292	19.6	5.12	4.23	465	2016-06-02
100					2016-06-02
490					2016-06-02
42	11.8	5.81	4.65	552	2016-06-02
406	11.3	6.05	4.05	569	2016-06-02
239	15.9	4.95	3.77	502	2016-06-02
103					2016-06-02
508					2016-06-02
195					2016-06-02
219					2016-06-02
267					2016-06-02
382					2016-06-02
477					2016-06-02
377					2016-06-02
216	14.3	5.4	4.21	466	2016-06-02
344	26.9	5.22	3.94	553	2016-06-02
74	11.4	5.19	4.07	572	2016-06-02
319					2016-06-02
90	24.2	4.72	3.9	618	2016-06-02
98	19.9	4.78	3.54	425	2016-06-02
236					2016-06-02
265	20.4	5.53	4.08	444	2016-06-02
193					2016-06-02
288					2016-06-02
233	11.7	5.22	4.15	542	2016-06-02
437					2016-06-02
385	7.4	5.75	4.49	667	2016-06-02
443	12.1	6.02	3.91	398	2016-06-02
299					2016-06-02
454	15.3	4.93	3.62	520	2016-06-02
553	19.5	4.42	3.56	504	2016-06-02
424					2016-06-02
643	23.3	4.29	3.41	462	2016-06-02
484	19.4	4.96	3.57	471	2016-06-02
89	20.7	4.45	4	526	2016-06-02
150	16.7	5.86	4.21	563	2016-06-02
645	16.2	5.49	3.61	471	2016-06-02
38	29.9	3.92	3.93	503	2016-06-02
457	22.7	5.41	3.9	507	2016-06-02
248	19.8	5.03	3.76	509	2016-06-02
170	13.9	5.83	4.29	652	2016-06-02
640	15.5	5.3	3.82	550	2016-06-02
60	19.9	5.15	3.59	545	2016-06-02
106	15	4.96	3.94	430	2016-06-02
379	13.1	5.97	3.99	610	2016-06-02
12	19.3	4.89	3.9	466	2016-06-02
451	15.9	4.37	3.68	463	2016-06-02
517	21.3	4.44	4.44	406	2016-06-02
636	22.1	4.14	3.66	471	2016-06-02
634	13.7	5.58	4.45	553	2016-06-02
631					2016-06-02
629	16.6	5.94	3.66	538	2016-06-02
627	26.9	4.44	3.89	568	2016-06-02
624	25.6	4.27	3.79	517	2016-06-02
622	11.9	6.97	4.3	568	2016-06-02
618	15.3	6.1	4.07	490	2016-06-02
579					2016-06-02
140					2016-06-02
523					2016-06-02
211					2016-06-02
375					2016-06-02
234					2016-06-02
359					2016-06-02
121					2016-06-02
392					2016-06-02
278					2016-06-02
346					2016-06-02
135	18.8	5.87	4.24	545	2016-06-02
132	20.7	3.79	3.69	510	2016-06-02
212	24.7	5.39	4.2	492	2016-06-02
535	22.8	4.79	3.57	510	2016-06-02
257					2016-06-02
453					2016-06-02
58					2016-06-02
323					2016-06-02
602					2016-06-02
485					2016-06-02
205					2016-06-02
114					2016-06-02
540					2016-06-02
411					2016-06-02
246					2016-06-02
528	20.1	5.43	3.96	443	2016-06-02
441					2016-06-02
63					2016-06-02
546					2016-06-02
287	25	5.09	3.87	447	2016-06-02
492					2016-06-02
45					2016-06-02
247	19.8	4.16	3.72	436	2016-06-02
336					2016-06-02
400	22.7	4.03	4.13	444	2016-06-02
435					2016-06-02
177	13.2	3.91	3.88	529	2016-06-02
616	17.3	4.86	4.15	432	2016-06-02
1	24.7	4.85	3.69	430	2016-06-02
393					2016-06-02
518					2016-06-02
251	29.2	4.13	3.79	511	2016-06-02
548	22.4	4.71	4.02	470	2016-06-02
447	16.2	5.65	3.89	600	2016-06-02
491	25.3	4	3.77	469	2016-06-02
158	20.5	5.56	4.12	525	2016-06-02
427	24.5	4.47	3.83	384	2016-06-02
418					2016-06-02
603	26.7	3.86	3.49	472	2016-06-02
604					2016-06-02
107	22.2	3.76	3.64	491	2016-06-02
396					2016-06-02
608					2016-06-02
92	18	3.96	3.85	463	2016-06-02
310					2016-06-02
356	13.9	4.71	4.11	514	2016-06-02
169					2016-06-02
470					2016-06-02
104					2016-06-02
426					2016-06-02
425					2016-06-02
480					2016-06-02
499					2016-06-02
433	25.7	4.92	3.93	435	2016-06-02
450					2016-06-02
6					2016-06-02
423					2016-06-02
335					2016-06-02
590					2016-06-02
407					2016-06-02
354					2016-06-02
118	12.7	5.21	3.56	561	2016-06-02
311	22.8	4.36	4.01	555	2016-06-02
421					2016-06-02
314					2016-06-02
245					2016-06-02
614	21.8	4.42	3.4	541	2016-06-02
95					2016-06-02
204	12.6	5.33	4.17	582	2016-06-02
78	6.7	4.04	3.67		2016-06-02
428	11.5	5.73	4.08	499	2016-06-02
414	10.9	4.8	4.04	420	2016-06-02
139	16.2	5.65	4	429	2016-06-02
178					2016-06-02
625	12.9	6.16	3.89	446	2016-06-02
598	16.3	4.6	3.62	395	2016-06-02
597	11	3.72	4.46	359	2016-06-02
208					2016-06-02
343					2016-06-02
64					2016-06-02
117	14.8	4.82	3.62	528	2016-06-02
180	15	4.57	3.78	471	2016-06-02
145	15.8	3.28	3.71	416	2016-06-02
633					2016-06-02
46	11.8	4.6	3.92	520	2016-06-02
277	15.7	5.05	4.15	394	2016-06-02
21					2016-06-02
264	15.7	4.62	3.89	437	2016-06-02
596	16.1	4.04	3.43	446	2016-06-02
175					2016-06-02
650	15.8	4.77	3.47	446	2016-06-02
142					2016-06-02
161	17.6	4.03	3.8	522	2016-06-02
194					2016-06-02
573					2016-06-02
599	9.9	4.47	3.58	432	2016-06-02
565	15.8	4.83	3.57	446	2016-06-02
82	15	5	3.99	471	2016-06-02
4	12.4	5.43	3.65	412	2016-06-02
476					2016-06-02
430					2016-06-02
498	13.8	6.07	4.24	503	2016-06-02
76	14.3	5.3	4.16	483	2016-06-02
84	11.5	6	3.93	470	2016-06-02
18					2016-06-02
532					2016-06-02
124					2016-06-02
32					2016-06-02
459					2016-06-02
355					2016-06-02
413	14.3	5.67	4.38	491	2016-06-02
545					2016-06-02
474					2016-06-02
404					2016-06-02
112	16.8	3.88	3.06	506	2016-06-02
91					2016-06-02
268	16.9	4.2	3.59	444	2016-06-02
232	16	5.64	4.08	544	2016-06-02
153	18.1	4.59	4.03	467	2016-06-02
109	14.7	5.84	4.01	452	2016-06-02
40					2016-06-02
61	21	4.89	3.94	471	2016-06-02
68	17	4.84	3.76	421	2016-06-02
286					2016-06-02
394					2016-06-02
52	13.9	5.77	4.36	528	2016-06-02
617	12.3	4.16	3.87	555	2016-06-02
460	14.5	4.75	3.14	482	2016-06-02
307	18.3	5.09	3.46	534	2016-06-02
99	12.8	5.93	3.98	487	2016-06-02
273	16.6	4.25	3.49	455	2016-06-02
295	14.4	4.83	4.09	465	2016-06-02
541					2016-06-02
22					2016-06-02
589	13.7	5.26	3.85	522	2016-06-02
159	14.4	5.41	4.32	406	2016-06-02
14					2016-06-02
519					2016-06-02
398					2016-06-02
258					2016-06-02
87					2016-06-02
214					2016-06-02
360					2016-06-02
405					2016-06-02
338					2016-06-02
235	15.6	4.56	3.74	456	2016-06-02
254	22.3	4.71	3.64	502	2016-06-02
432					2016-06-02
201					2016-06-02
143					2016-06-02
189	17.9	4.68	3.71	461	2016-06-02
15					2016-06-02
231					2016-06-02
283					2016-06-02
69					2016-06-02
348					2016-06-02
133					2016-06-02
164	14	5.47	3.83	428	2016-06-02
167					2016-06-02
111					2016-06-02
71					2016-06-02
402					2016-06-02
644					2016-06-02
10					2016-06-02
472					2016-06-02
35					2016-06-02
65					2016-06-02
429					2016-06-02
171					2016-06-02
294					2016-06-02
381	18.3	4.54	3.49	475	2016-06-02
458					2016-06-02
101	19.5	4.52	3.87	393	2016-06-02
70	24.3	4.5	3.81	442	2016-06-02
79					2016-06-02
431	19.6	4.72	3.7	481	2016-06-02
347					2016-06-02
641					2016-06-02
151					2016-06-02
530	17.5	4.08	3.78	374	2016-06-02
495					2016-06-02
7					2016-06-02
574					2016-06-02
318					2016-06-02
88					2016-06-02
526					2016-06-02
298					2016-06-02
438					2016-06-02
468					2016-06-02
230					2016-06-02
564					2016-06-02
560					2016-06-02
324	19.9	4.82	3.95	445	2016-06-02
259					2016-06-02
13					2016-06-02
225	10.1	4.89	4.72	386	2016-06-02
449	15.6	6.22	4.87	392	2016-06-02
512	10	5.42	4.21	436	2016-06-02
368	6.3	5.54	4.18	377	2016-06-02
50	0.4	5.78	4.77	396	2016-06-02
473	5.8	7.2	4.58	368	2016-06-02
244	6.2	7.1	4.41	365	2016-06-02
329	5.4	2.86	4.31	400	2016-06-02
549	9.1	7.62	4.97	544	2016-06-02
373	8.5	4.06	3.96	453	2016-06-02
280					2016-06-02
185					2016-06-02
228					2016-06-02
620					2016-06-02
27					2016-06-03
47					2016-06-03
125	12.9	6.31	4.23	605	2016-06-03
144	25.7	4.64	3.94	539	2016-06-03
253	20.7	5.17	3.89	539	2016-06-03
274	18.4	4.62	3.74	509	2016-06-03
192					2016-06-03
200	31.3	4.79	4.18	575	2016-06-03
361	18.9	6.6	4.32	567	2016-06-03
11					2016-06-03
466	27.3	5.32	3.92	564	2016-06-03
483	16.8	5.47	3.87	464	2016-06-03
632	11.4	5.91	4.19	574	2016-06-03
380	23.7	5.85	4.51	530	2016-06-03
8	14	6.18	5.73	529	2016-06-03
181	20.4	6.09	3.75	495	2016-06-03
24	26	6.17	3.99	604	2016-06-03
36	15.1	5.7	4.06	578	2016-06-03
37	28.1	4.34	3.56	528	2016-06-03
134	23	4.7	3.78	643	2016-06-03
209	21.3	5.74	3.89	544	2016-06-03
281	21	5.49	3.61	571	2016-06-03
269	12.4	6.72	4.36	544	2016-06-03
306	15.8	4.66	4.56	504	2016-06-03
54	18.8	5.21	4.25	499	2016-06-03
537	16.6	5.2	3.91	464	2016-06-03
113	13.8	5.27	3.66	396	2016-06-03
403	18.6	4.06	4.77		2016-06-03
188	18.4	4.81	4.02	552	2016-06-03
146					2016-06-03
384					2016-06-03
494	22.5	4.12	4.39	503	2016-06-03
183	23.1	4.89	3.74	593	2016-06-03
86	21.3	4.99	4.1	507	2016-06-03
543	17.6	6.23	4.11	552	2016-06-03
544					2016-06-03
547	11.4	6.42	3.9	524	2016-06-03
241					2016-06-03
410	15.6	6.09	3.9	596	2016-06-03
342	19.2	4	3.35	690	2016-06-03
173	26.3	4.31	3.63	522	2016-06-03
504	12.8	5.35	4.41	482	2016-06-03
179					2016-06-03
389					2016-06-03
2	13.7	5.58	3.89	516	2016-06-03
66	9	5.01	3.46	553	2016-06-03
119	16.6	4.97	4.1	476	2016-06-03
366	25.9	4.68	3.93	495	2016-06-03
369	13	4.9	4.07	517	2016-06-03
556	18.8	5.23	4.05	515	2016-06-03
291					2016-06-03
352	25.7	4.91	3.63	522	2016-06-03
292	20.1	5.18	4.2	495	2016-06-03
100					2016-06-03
490					2016-06-03
42	12.2	6.29	4.62	542	2016-06-03
406	11.5	6	4.1	578	2016-06-03
239	15.2	4.87	3.83	506	2016-06-03
103					2016-06-03
508					2016-06-03
195					2016-06-03
219					2016-06-03
267					2016-06-03
382					2016-06-03
477					2016-06-03
377					2016-06-03
216	13.6	5.62	4.3	466	2016-06-03
344	28.5	5.15	3.86	541	2016-06-03
74	10.9	5.49	4.07	572	2016-06-03
319					2016-06-03
90	24.7	4.77	3.87	635	2016-06-03
98	18.8	5.04	3.59	414	2016-06-03
236					2016-06-03
265	20.7	5.34	4.06	444	2016-06-03
193					2016-06-03
288					2016-06-03
233	11.1	5.42	4.1	537	2016-06-03
437					2016-06-03
385	6.9	5.47	4.38	662	2016-06-03
443	12.7	6.01	3.88	394	2016-06-03
299					2016-06-03
454	15.4	4.77	3.61	521	2016-06-03
553	19.6	4.51	3.6	506	2016-06-03
424					2016-06-03
643	22.5	4.18	3.38	466	2016-06-03
484	19.3	4.96	3.56	464	2016-06-03
89	21.9	4.45	3.95	517	2016-06-03
150	17.2	5.89	4.31	563	2016-06-03
645	16.6	5.59	3.62	465	2016-06-03
38	30	4.3	3.93	523	2016-06-03
457	24.2	5.42	3.86	517	2016-06-03
248	20	5.14	3.75	514	2016-06-03
170	14.1	5.92	4.26	579	2016-06-03
640	15.6	5.1	3.82	540	2016-06-03
60	19.8	4.92	3.55	519	2016-06-03
106	15.8	5.15	3.94	440	2016-06-03
379	13.5	5.98	3.88	600	2016-06-03
12	23	5.44	3.85	459	2016-06-03
451	16.2	4.6	3.66	465	2016-06-03
517	20.7	4.74	4.39	408	2016-06-03
636	22.2	4.2	3.73	474	2016-06-03
634	14.1	5.75	4.47	570	2016-06-03
631					2016-06-03
629	16.3	5.76	3.68	532	2016-06-03
627	25.1	4.47	3.88	521	2016-06-03
624	25.7	4.42	3.77	513	2016-06-03
622					2016-06-03
618	16.2	6.05	4.04	502	2016-06-03
579					2016-06-03
140					2016-06-03
523					2016-06-03
211					2016-06-03
375					2016-06-03
234					2016-06-03
359					2016-06-03
121					2016-06-03
392					2016-06-03
278					2016-06-03
346					2016-06-03
135	19.1	5.87	4.22	553	2016-06-03
132	17.9	3.6	3.79	527	2016-06-03
212	24.8	5.92	4.1	483	2016-06-03
535	22.3	5.03	3.56	513	2016-06-03
257					2016-06-03
453					2016-06-03
58					2016-06-03
323					2016-06-03
602					2016-06-03
485					2016-06-03
205					2016-06-03
114					2016-06-03
540					2016-06-03
411					2016-06-03
246					2016-06-03
528	38.3	5.49	3.96	437	2016-06-03
441					2016-06-03
63					2016-06-03
546					2016-06-03
287	24.2	4.89	3.93	451	2016-06-03
492					2016-06-03
45					2016-06-03
247	19	3.85	3.74	435	2016-06-03
336					2016-06-03
400	21.8	4.05	3.97	439	2016-06-03
435					2016-06-03
177	13.2	4.06	3.95	529	2016-06-03
616	18.4	4.97	4.09	426	2016-06-03
1	23.9	4.84	3.69	432	2016-06-03
393					2016-06-03
518					2016-06-03
251	32.1	4.55	3.68	505	2016-06-03
548	22.3	4.53	4.06	469	2016-06-03
447	15.6	5.52	3.87	592	2016-06-03
491	27	3.87	3.79	475	2016-06-03
158	16.7	5.44	4.13	520	2016-06-03
427	25.2	4.8	3.75	388	2016-06-03
418					2016-06-03
603	26.3	3.86	3.55	422	2016-06-03
604					2016-06-03
107	22.5	3.59	3.61	491	2016-06-03
396					2016-06-03
608					2016-06-03
92	17.7	3.8	3.82	461	2016-06-03
310					2016-06-03
356	13.8	4.45	4.13	512	2016-06-03
169					2016-06-03
470					2016-06-03
104					2016-06-03
426					2016-06-03
425					2016-06-03
480					2016-06-03
499					2016-06-03
433	27	4.89	3.91	427	2016-06-03
450					2016-06-03
6					2016-06-03
423					2016-06-03
335					2016-06-03
590					2016-06-03
407					2016-06-03
354					2016-06-03
118	13.5	5.49	3.51	565	2016-06-03
311	23	4.42	4.02	589	2016-06-03
421					2016-06-03
314					2016-06-03
245					2016-06-03
614	23.2	4.08	3.35	548	2016-06-03
95					2016-06-03
204	12.7	5.15	4.11	581	2016-06-03
78	12.5	5.14	3.59	548	2016-06-03
428	11.5	5.73	4.08	500	2016-06-03
414	11.3	5.32	4.03	419	2016-06-03
139	16.4	5.55	3.99	430	2016-06-03
178					2016-06-03
625	12.4	5.81	3.92	448	2016-06-03
598	16.4	4.43	3.6	396	2016-06-03
597	11.2	3.23	4.46	353	2016-06-03
208					2016-06-03
343					2016-06-03
64					2016-06-03
117	14.1	4.98	3.69	528	2016-06-03
180	15.6	4.76	3.81	469	2016-06-03
145	15	3.47	3.75	415	2016-06-03
633					2016-06-03
46	12.1	4.82	3.86	544	2016-06-03
277	15.7	5.13	4.16	382	2016-06-03
21					2016-06-03
264	15.6	4.55	3.91	440	2016-06-03
596	16.5	4.11	3.44	444	2016-06-03
175					2016-06-03
650	16	4.56	3.46	446	2016-06-03
142					2016-06-03
161	16.4	4.13	3.82	522	2016-06-03
194					2016-06-03
573					2016-06-03
599	10	4.21	3.62	432	2016-06-03
565	16	4.78	3.65	453	2016-06-03
82	14.4	5.12	4.01	474	2016-06-03
4	12.1	5.56	3.71	410	2016-06-03
476					2016-06-03
430					2016-06-03
498	13.4	5.94	4.22	495	2016-06-03
76	14.4	5.3	4.16	475	2016-06-03
84	12	5.97	3.95	472	2016-06-03
18					2016-06-03
532					2016-06-03
124					2016-06-03
32					2016-06-03
459					2016-06-03
355					2016-06-03
413	13.3	5.91	4.42	480	2016-06-03
545					2016-06-03
474					2016-06-03
404					2016-06-03
112	16.9	4.02	3.04	491	2016-06-03
91					2016-06-03
268	17	4.26	3.6	460	2016-06-03
232	17	5.46	4.09	556	2016-06-03
153	14.7	4.61	4.11	489	2016-06-03
109	14.2	5.83	4.01	455	2016-06-03
40					2016-06-03
61	21.1	5.04	3.91	471	2016-06-03
68	14.7	4.39	3.78	425	2016-06-03
286					2016-06-03
394					2016-06-03
52	14.1	5.76	4.33	533	2016-06-03
617	12.2	4.4	3.91	567	2016-06-03
460	17.1	4.04	2.97	498	2016-06-03
307	19.3	5.11	3.47	566	2016-06-03
99	13.2	6	4.01	484	2016-06-03
273	16.1	4.32	3.48	447	2016-06-03
295	14.2	4.91	4.09	464	2016-06-03
541					2016-06-03
22					2016-06-03
589	13.1	5.34	3.81	520	2016-06-03
159	14.6	5.29	4.31	407	2016-06-03
14					2016-06-03
519					2016-06-03
398					2016-06-03
258					2016-06-03
87					2016-06-03
214					2016-06-03
360					2016-06-03
405					2016-06-03
338					2016-06-03
235	15.3	4.59	3.75	507	2016-06-03
254	21	4.94	3.72	509	2016-06-03
432					2016-06-03
201					2016-06-03
143					2016-06-03
189	17.9	4.63	3.68	450	2016-06-03
15					2016-06-03
231					2016-06-03
283					2016-06-03
69					2016-06-03
348					2016-06-03
133					2016-06-03
164	14.4	5.32	3.82	422	2016-06-03
167					2016-06-03
111					2016-06-03
71					2016-06-03
402					2016-06-03
644					2016-06-03
10					2016-06-03
472					2016-06-03
35					2016-06-03
65					2016-06-03
429					2016-06-03
171					2016-06-03
294					2016-06-03
381	17.5	4.27	3.54	468	2016-06-03
458					2016-06-03
101	20	4.57	3.81	392	2016-06-03
70	25.1	4.49	3.83	436	2016-06-03
79					2016-06-03
431	19.6	4.98	3.7	388	2016-06-03
347					2016-06-03
641					2016-06-03
151					2016-06-03
530	14.4	4.43	3.67	373	2016-06-03
495					2016-06-03
7					2016-06-03
574					2016-06-03
318					2016-06-03
88					2016-06-03
526					2016-06-03
298					2016-06-03
438					2016-06-03
468					2016-06-03
230					2016-06-03
564					2016-06-03
560					2016-06-03
324	21.7	4.78	3.88	460	2016-06-03
259					2016-06-03
13					2016-06-03
225	9.7	5.14	4.74	392	2016-06-03
449	9.5	5.57	4.77	389	2016-06-03
512	8.9	6.75	4.25	429	2016-06-03
368	9.8	6.06	3.79	396	2016-06-03
50	4.9	5.55	4.68	398	2016-06-03
473	7.1	7.7	4.48	376	2016-06-03
244	7.7	8.14	4.35	381	2016-06-03
329	8.3	3.94	4.55	408	2016-06-03
549	8.8	8.08	4.93	547	2016-06-03
373	5.7	6.31	4.33	455	2016-06-03
280					2016-06-03
185					2016-06-03
261	0				2016-06-03
228					2016-06-03
620					2016-06-03
27					2016-06-04
47					2016-06-04
125	11.3	6.75	4.27	616	2016-06-04
144	25.7	4.42	3.92	548	2016-06-04
253	21.4	5.31	3.87	538	2016-06-04
274	18.9	4.49	3.76	523	2016-06-04
192					2016-06-04
200	30.7	4.72	4.17	568	2016-06-04
361	18.6	6.39	4.37	567	2016-06-04
11					2016-06-04
466	26.1	4.97	3.98	537	2016-06-04
483	17.1	5.58	3.89	466	2016-06-04
632	12.3	5.86	4.2	591	2016-06-04
380	18.6	5.88	4.49	504	2016-06-04
8	19.8	5.94	5.39	542	2016-06-04
181	20.9	6.3	3.77	502	2016-06-04
24	26.5	6.14	3.9	609	2016-06-04
36	16	5.81	4.03	579	2016-06-04
37	29.7	4.58	3.58	541	2016-06-04
134	23.2	4.68	3.76	645	2016-06-04
209	22.8	5.54	3.9	549	2016-06-04
281	20.3	5.13	3.66	564	2016-06-04
269	12.7	6.93	4.38	562	2016-06-04
306	16.3	4.62	4.52	510	2016-06-04
54	19.5	5.5	4.23	506	2016-06-04
537	16.2	4.93	3.96	466	2016-06-04
113	14	5.19	3.64	388	2016-06-04
403	31	3.82	4.62	482	2016-06-04
188	17.9	4.6	3.96	554	2016-06-04
146					2016-06-04
384					2016-06-04
494	22.2	4.23	4.37	493	2016-06-04
183	24.2	5.28	3.76	602	2016-06-04
86	22.4	5.24	4.08	511	2016-06-04
543	16.8	6.14	4.07	572	2016-06-04
544					2016-06-04
547	11.4	6.46	3.94	521	2016-06-04
241					2016-06-04
410	15.1	6.29	3.9	602	2016-06-04
342	18.9	3.78	3.32	708	2016-06-04
173	27.6	4.45	3.65	523	2016-06-04
504	12.7	5.59	4.46	485	2016-06-04
179					2016-06-04
389					2016-06-04
2	12.7	5.5	3.91	521	2016-06-04
66	9.6	4.93	3.47	553	2016-06-04
119	16.6	5.07	4.07	477	2016-06-04
366	25.5	4.43	3.95	495	2016-06-04
369	12.7	4.7	4.1	513	2016-06-04
556	18.1	5.27	4.04	514	2016-06-04
291					2016-06-04
352	24.7	4.84	3.68	568	2016-06-04
292	20.3	5.39	4.22	463	2016-06-04
100					2016-06-04
490					2016-06-04
42	12	6.26	4.65	540	2016-06-04
406	10.8	6.15	4.14	574	2016-06-04
239	15.2	5.11	3.86	507	2016-06-04
103					2016-06-04
508					2016-06-04
195					2016-06-04
219					2016-06-04
267					2016-06-04
382					2016-06-04
477					2016-06-04
377					2016-06-04
216	13	5.4	4.3	472	2016-06-04
344	28.3	4.94	3.82	539	2016-06-04
74	11.1	5.4	4.01	578	2016-06-04
319					2016-06-04
90	24.1	4.67	3.89	613	2016-06-04
98	19.6	4.84	3.5	414	2016-06-04
236					2016-06-04
265	21.1	5.34	4.05	441	2016-06-04
193					2016-06-04
288					2016-06-04
233	12.1	5.67	4.02	534	2016-06-04
437					2016-06-04
385	7.3	5.9	4.43	647	2016-06-04
443	12.8	5.79	3.87	400	2016-06-04
299					2016-06-04
454	14.9	4.77	3.63	522	2016-06-04
553	19	4.44	3.58	505	2016-06-04
424					2016-06-04
643	23	4.35	3.39	460	2016-06-04
484	19.8	5.03	3.65	483	2016-06-04
89	19.7	4.41	4	529	2016-06-04
150	17.7	5.64	4.38	572	2016-06-04
645	16	5.31	3.59	473	2016-06-04
38	30.4	4.06	3.86	532	2016-06-04
457	23	5.48	3.91	510	2016-06-04
248	20.2	5.12	3.79	514	2016-06-04
170	13.8	6.11	4.28	590	2016-06-04
640	15.7	4.88	3.85	549	2016-06-04
60	19.3	4.99	3.55	543	2016-06-04
106	16.4	5.33	3.98	430	2016-06-04
379	13.4	5.67	3.82	603	2016-06-04
12	19.3	5.27	3.77	453	2016-06-04
451	16.2	4.66	3.71	467	2016-06-04
517	21.4	4.49	4.4	408	2016-06-04
636	23	4	3.73	473	2016-06-04
634	14.1	5.94	4.49	578	2016-06-04
631					2016-06-04
629	16.4	5.86	3.74	527	2016-06-04
627	24.2	4.31	3.94	508	2016-06-04
624	25	4.41	3.79	512	2016-06-04
622	11	7.56	4.31		2016-06-04
618	15.4	6.25	4.08	524	2016-06-04
579					2016-06-04
140					2016-06-04
523					2016-06-04
211					2016-06-04
375					2016-06-04
234					2016-06-04
359					2016-06-04
121					2016-06-04
392					2016-06-04
278					2016-06-04
346					2016-06-04
135	19.9	5.84	4.25	544	2016-06-04
132	18.1	3.62	3.79	518	2016-06-04
212	24.1	5.72	4.07	477	2016-06-04
535	23	5.04	3.57	508	2016-06-04
257					2016-06-04
453					2016-06-04
58					2016-06-04
323					2016-06-04
602					2016-06-04
485					2016-06-04
205					2016-06-04
114					2016-06-04
540					2016-06-04
411					2016-06-04
246					2016-06-04
528	20.6	5.48	4	439	2016-06-04
441					2016-06-04
63					2016-06-04
546					2016-06-04
287	24.7	5.05	3.91	448	2016-06-04
492					2016-06-04
45					2016-06-04
247	18.6	3.78	3.76	434	2016-06-04
336					2016-06-04
400	20.6	4.27	3.99	438	2016-06-04
435					2016-06-04
177	12.7	3.91	3.94	533	2016-06-04
616	18.7	5.3	4.07	442	2016-06-04
1	24.6	4.59	3.64	437	2016-06-04
393					2016-06-04
518					2016-06-04
251	31	4.25	3.63	501	2016-06-04
548	22.6	4.95	4.07	467	2016-06-04
447	15.1	5.71	3.91	588	2016-06-04
491	24.3	3.89	3.77	466	2016-06-04
158	19.1	5.81	4.01	507	2016-06-04
427	25.6	4.88	3.8	381	2016-06-04
418					2016-06-04
603	25.5	4.1	3.58	423	2016-06-04
604					2016-06-04
107	22.1	3.46	3.55	502	2016-06-04
396					2016-06-04
608					2016-06-04
92	18.5	3.85	3.81	463	2016-06-04
310					2016-06-04
356	27.8	4.28	4.22	524	2016-06-04
169					2016-06-04
470					2016-06-04
104					2016-06-04
426					2016-06-04
425					2016-06-04
480					2016-06-04
499					2016-06-04
433	26.4	4.47	3.82	422	2016-06-04
450					2016-06-04
6					2016-06-04
423					2016-06-04
335					2016-06-04
590					2016-06-04
407					2016-06-04
354					2016-06-04
118	13.9	5.31	3.5	554	2016-06-04
311	23.6	4.43	4.02	536	2016-06-04
421					2016-06-04
314					2016-06-04
245					2016-06-04
614	21.4	4.17	3.42	540	2016-06-04
95					2016-06-04
204	12.6	5.17	4.14	587	2016-06-04
78	17.9	4.89	3.5	581	2016-06-04
428	10.9	5.94	4.08	500	2016-06-04
414	10.8	5.53	4.05	414	2016-06-04
139	16.4	5.17	4	431	2016-06-04
178					2016-06-04
625	12.6	5.6	3.9	445	2016-06-04
598	15.6	4.33	3.62	397	2016-06-04
597	11.5	3.52	4.43	356	2016-06-04
208					2016-06-04
343					2016-06-04
64					2016-06-04
117	14.6	4.89	3.65	532	2016-06-04
180	16.1	4.77	3.79	469	2016-06-04
145	14.9	3.11	3.74	423	2016-06-04
633					2016-06-04
46	12.2	4.81	3.83	542	2016-06-04
277	15.3	5.13	4.16	391	2016-06-04
21					2016-06-04
264	15.1	4.59	3.91	447	2016-06-04
596	15.8	4.08	3.46	447	2016-06-04
175					2016-06-04
650	15.5	4.74	3.55	444	2016-06-04
142					2016-06-04
161	16.5	4.22	3.83	527	2016-06-04
194					2016-06-04
573					2016-06-04
599	10.4	4.17	3.61	424	2016-06-04
565	13	4.8	3.75	451	2016-06-04
82	14.4	5.44	4.01	458	2016-06-04
4	12	5.28	3.73	415	2016-06-04
476					2016-06-04
430					2016-06-04
498	12.9	6.03	4.25	509	2016-06-04
76	14	5.28	4.15	480	2016-06-04
84	11.7	6.31	4.03	474	2016-06-04
18					2016-06-04
532					2016-06-04
124					2016-06-04
32					2016-06-04
459					2016-06-04
355					2016-06-04
413	13.4	6.15	4.47	479	2016-06-04
545					2016-06-04
474					2016-06-04
404					2016-06-04
112	16.8	4.28	2.99	488	2016-06-04
91					2016-06-04
268	17.4	4.19	3.58	459	2016-06-04
232	17	5.36	4.09	537	2016-06-04
153	16.3	5.07	4.04	475	2016-06-04
109	14.7	5.75	3.98	450	2016-06-04
40					2016-06-04
61	21.4	4.6	3.97	471	2016-06-04
68	17.2	4.43	3.72	432	2016-06-04
286					2016-06-04
394					2016-06-04
52	13.5	5.9	4.34	527	2016-06-04
617	12.4	4.54	3.91	559	2016-06-04
460	18.1	3.76	3.01	500	2016-06-04
307	18.2	5.1	3.52	560	2016-06-04
99	12.7	5.74	4.02	493	2016-06-04
273	15.9	4.16	3.47	456	2016-06-04
295	13.6	4.92	4.09	464	2016-06-04
541					2016-06-04
22					2016-06-04
589	13.1	5.33	3.8	521	2016-06-04
159	14.7	5.41	4.28	412	2016-06-04
14					2016-06-04
519					2016-06-04
398					2016-06-04
258					2016-06-04
87					2016-06-04
214					2016-06-04
360					2016-06-04
405					2016-06-04
338					2016-06-04
235	15.3	4.65	3.79	451	2016-06-04
254	22.9	5	3.7	514	2016-06-04
432					2016-06-04
201					2016-06-04
143					2016-06-04
189	17.8	4.73	3.75	458	2016-06-04
15					2016-06-04
231					2016-06-04
283					2016-06-04
69					2016-06-04
348					2016-06-04
133					2016-06-04
164	13.4	5.69	3.84	425	2016-06-04
167					2016-06-04
111					2016-06-04
71					2016-06-04
402					2016-06-04
644					2016-06-04
10					2016-06-04
472					2016-06-04
35					2016-06-04
65					2016-06-04
429					2016-06-04
171					2016-06-04
294					2016-06-04
381	17.8	4.13	3.55	471	2016-06-04
458					2016-06-04
101	19.9	4.65	3.75	385	2016-06-04
70	24.2	4.49	3.78	451	2016-06-04
79					2016-06-04
431	19.6	5.07	3.7	385	2016-06-04
347					2016-06-04
641					2016-06-04
151					2016-06-04
530	16.9	4.63	3.62	378	2016-06-04
495					2016-06-04
7					2016-06-04
574					2016-06-04
318					2016-06-04
88					2016-06-04
526					2016-06-04
298					2016-06-04
438					2016-06-04
468					2016-06-04
230					2016-06-04
564					2016-06-04
560					2016-06-04
324	22.3	4.55	3.87	530	2016-06-04
259					2016-06-04
13					2016-06-04
225	10.7	4.94	4.69	385	2016-06-04
449	12.2	5.51	4.53	393	2016-06-04
512	7.9	7.27	4.3	438	2016-06-04
368	11.3	5.72	3.72	387	2016-06-04
50	6.1	3.69	4.79	397	2016-06-04
473	8	7.46	4.35	382	2016-06-04
244	9.7	8.28	4.18	373	2016-06-04
329	8.3	5.13	4.47	396	2016-06-04
549	7.3	8.22	4.95	543	2016-06-04
373	6.5	9.97	4.8	452	2016-06-04
280					2016-06-04
185					2016-06-04
261	5.4	6.22	4.83	377	2016-06-04
228					2016-06-04
620					2016-06-04
27					2016-06-05
47					2016-06-05
125	13	6.66	4.22	621	2016-06-05
144	25.1	4.41	3.95	540	2016-06-05
253	20.3	5.16	3.88	540	2016-06-05
274	19.2	4.49	3.71	480	2016-06-05
192					2016-06-05
200	31.7	4.64	4.1	584	2016-06-05
361	18.2	6.54	4.44	567	2016-06-05
11					2016-06-05
466	26.4	4.94	3.97	543	2016-06-05
483	16.6	5.55	3.92	461	2016-06-05
632	11.3	6.06	4.25	599	2016-06-05
380	16.6	6.35	4.43	516	2016-06-05
8	20.7	5.55	5.22	545	2016-06-05
181	21	6	3.8	503	2016-06-05
24	25	6.04	3.83	606	2016-06-05
36	15.5	5.82	4.07	580	2016-06-05
37	29.9	4.5	3.63	533	2016-06-05
134	25.6	4.64	3.73	647	2016-06-05
209	23	5.48	3.91	554	2016-06-05
281	20.1	5.26	3.65	578	2016-06-05
269	12.9	6.91	4.33	558	2016-06-05
306	16.4	4.27	4.47	506	2016-06-05
54	18.7	5.56	4.22	497	2016-06-05
537	16.9	4.73	3.99	477	2016-06-05
113	14.2	5.27	3.62	398	2016-06-05
403	14.3	6	5.36	480	2016-06-05
188	17.8	4.35	3.97	556	2016-06-05
146					2016-06-05
384					2016-06-05
494	22.6	3.96	4.35	474	2016-06-05
183	23	5.07	3.78	601	2016-06-05
86	22.2	5.11	4.09	512	2016-06-05
543	17.4	5.76	4.07	583	2016-06-05
544					2016-06-05
547	11.2	6.49	3.97	530	2016-06-05
241					2016-06-05
410	15.3	6.09	3.83	570	2016-06-05
342	18.9	3.95	3.31	694	2016-06-05
173	26.6	4.29	3.7	515	2016-06-05
504	12.6	5.78	4.48	488	2016-06-05
179					2016-06-05
389					2016-06-05
2	13.3	5.27	3.88	515	2016-06-05
66	8.9	5.07	3.47	555	2016-06-05
119	16.2	5.16	4.09	471	2016-06-05
366	25.2	4.25	4	495	2016-06-05
369	13.1	4.6	4.07	509	2016-06-05
556	18.4	5.4	4.08	510	2016-06-05
291					2016-06-05
352	25.3	4.83	3.7	524	2016-06-05
292	20	5.23	4.19	467	2016-06-05
100					2016-06-05
490					2016-06-05
42	11.6	6.5	4.63	551	2016-06-05
406	10	6.37	4.14	568	2016-06-05
239	16.1	5.01	3.82	506	2016-06-05
103					2016-06-05
508					2016-06-05
195					2016-06-05
219					2016-06-05
267					2016-06-05
382					2016-06-05
477					2016-06-05
377					2016-06-05
216	13.1	5.42	4.29	470	2016-06-05
344	28.3	4.94	3.84	547	2016-06-05
74	11.2	5.28	4.01	578	2016-06-05
319					2016-06-05
90	23.1	4.91	3.9	596	2016-06-05
98	19.6	4.8	3.5	419	2016-06-05
236					2016-06-05
265	20.4	5.28	4.04	451	2016-06-05
193					2016-06-05
288					2016-06-05
233	12.9	5.51	3.99	539	2016-06-05
437					2016-06-05
385	7.2	5.9	4.47	673	2016-06-05
443	13.3	5.67	3.87	398	2016-06-05
299					2016-06-05
454	15.1	4.84	3.64	525	2016-06-05
553	19.2	4.5	3.53	503	2016-06-05
424					2016-06-05
643	22.2	4.41	3.46	463	2016-06-05
484	21.3	4.95	3.62	498	2016-06-05
89	20.5	4.4	4.02	522	2016-06-05
150	17.6	5.52	4.42	567	2016-06-05
645	16.7	5.53	3.59	474	2016-06-05
38	32.4	4.05	3.7	484	2016-06-05
457	23.8	5.37	3.89	516	2016-06-05
248	21.1	5.13	3.8	506	2016-06-05
170	13.5	6.31	4.29	579	2016-06-05
640	15.9	4.64	3.76	547	2016-06-05
60	20.9	5.09	3.53	535	2016-06-05
106	17.8	4.98	4	434	2016-06-05
379	13.4	5.43	3.84	611	2016-06-05
12	20.2	5.4	3.78	459	2016-06-05
451	16.4	4.49	3.76	471	2016-06-05
517	20.7	4.59	4.41	412	2016-06-05
636	23.7	3.96	3.69	478	2016-06-05
634	15.4	5.68	4.46	571	2016-06-05
631					2016-06-05
629	16.1	5.66	3.69	535	2016-06-05
627	20.4	4.21	3.95	515	2016-06-05
624	26	4.18	3.8	512	2016-06-05
622	11	7.76	4.28	556	2016-06-05
618	15.8	6.36	4.09	523	2016-06-05
579					2016-06-05
140					2016-06-05
523					2016-06-05
211					2016-06-05
375					2016-06-05
234					2016-06-05
359					2016-06-05
121					2016-06-05
392					2016-06-05
278					2016-06-05
346					2016-06-05
135	19.3	5.75	4.23	542	2016-06-05
132	17.2	3.59	3.73	527	2016-06-05
212	25.3	5.8	3.93	474	2016-06-05
535	23.2	4.91	3.57	519	2016-06-05
257					2016-06-05
453					2016-06-05
58					2016-06-05
323					2016-06-05
602					2016-06-05
485					2016-06-05
205					2016-06-05
114					2016-06-05
540					2016-06-05
411					2016-06-05
246					2016-06-05
528	20.6	5.17	4.01	435	2016-06-05
441					2016-06-05
63					2016-06-05
546					2016-06-05
287	23.6	4.65	3.88	448	2016-06-05
492					2016-06-05
45					2016-06-05
247	19.3	3.85	3.74	433	2016-06-05
336					2016-06-05
400	21.1	4.16	3.95	434	2016-06-05
435					2016-06-05
177	13.6	4.06	3.92	528	2016-06-05
616	18.8	5.31	4.04	435	2016-06-05
1	23.8	4.68	3.73	430	2016-06-05
393					2016-06-05
518					2016-06-05
251	28.9	4.31	3.47	490	2016-06-05
548	21.6	4.82	4.1	460	2016-06-05
447	15.4	5.95	3.94	586	2016-06-05
491	25.5	4.04	3.77	470	2016-06-05
158	21.4	5.92	3.96	522	2016-06-05
427	24.4	4.66	3.79	385	2016-06-05
418					2016-06-05
603	26.7	3.81	3.55	422	2016-06-05
604					2016-06-05
107	21.7	3.52	3.55	500	2016-06-05
396					2016-06-05
608					2016-06-05
92	17.7	3.74	3.84	465	2016-06-05
310					2016-06-05
356	12.8	4.56	4.18	519	2016-06-05
169					2016-06-05
470					2016-06-05
104					2016-06-05
426					2016-06-05
425					2016-06-05
480					2016-06-05
499					2016-06-05
433	25	5.08	3.84	417	2016-06-05
450					2016-06-05
6					2016-06-05
423					2016-06-05
335					2016-06-05
590					2016-06-05
407					2016-06-05
354					2016-06-05
118	13.3	5.47	3.52	560	2016-06-05
311	23.7	4.6	4.02	533	2016-06-05
421					2016-06-05
314					2016-06-05
245					2016-06-05
614	24.7	4.23	3.38	546	2016-06-05
95					2016-06-05
204	12.8	5.18	4.17	585	2016-06-05
78	19.8	4.79	3.49	577	2016-06-05
428	10.6	5.6	4.02	505	2016-06-05
414	11.3	5.22	4.05	419	2016-06-05
139	16.3	5.21	3.99	432	2016-06-05
178					2016-06-05
625	13.3	5.95	3.87	445	2016-06-05
598	15.7	4.39	3.59	404	2016-06-05
597	11.7	3.92	4.37	353	2016-06-05
208					2016-06-05
343					2016-06-05
64					2016-06-05
117	14.9	4.88	3.63	521	2016-06-05
180	16.3	4.54	3.75	475	2016-06-05
145	15	3.14	3.78	415	2016-06-05
633					2016-06-05
46	12.3	4.73	3.84	541	2016-06-05
277	15.9	5.14	4.13	386	2016-06-05
21					2016-06-05
264	15.2	4.68	3.91	444	2016-06-05
596	16.1	4.05	3.45	450	2016-06-05
175					2016-06-05
650	16	4.82	3.61	457	2016-06-05
142					2016-06-05
161	16.9	4.13	3.8	530	2016-06-05
194					2016-06-05
573					2016-06-05
599	10.1	4.34	3.62	438	2016-06-05
565	13.9	5.25	3.72	453	2016-06-05
82	14.3	5.32	3.99	467	2016-06-05
4	12.5	5.56	3.73	414	2016-06-05
476					2016-06-05
430					2016-06-05
498	13	6.25	4.28	496	2016-06-05
76	14.3	5.25	4.12	476	2016-06-05
84	12	6.17	4.01	473	2016-06-05
18					2016-06-05
532					2016-06-05
124					2016-06-05
32					2016-06-05
459					2016-06-05
355					2016-06-05
413	12	5.72	4.52	481	2016-06-05
545					2016-06-05
474					2016-06-05
404					2016-06-05
112	17.2	4.06	3.01	488	2016-06-05
91					2016-06-05
268	17.1	4.51	3.61	454	2016-06-05
232	17.2	5.37	4.07	556	2016-06-05
153	13.8	5.4	4.02	479	2016-06-05
109	14.5	5.49	3.95	452	2016-06-05
40					2016-06-05
61	20.6	4.6	3.99	472	2016-06-05
68	17.8	4.52	3.74	419	2016-06-05
286					2016-06-05
394					2016-06-05
52	14	5.77	4.27	525	2016-06-05
617	12.9	4.13	3.89	559	2016-06-05
460	18	3.75	3.27	480	2016-06-05
307	19.4	5.06	3.49	550	2016-06-05
99	13.6	5.59	4.05	494	2016-06-05
273	15.9	4.15	3.49	447	2016-06-05
295	13.8	4.93	4.08	467	2016-06-05
541					2016-06-05
22					2016-06-05
589	12.8	5.24	3.8	487	2016-06-05
159	14.3	5.32	4.27	408	2016-06-05
14					2016-06-05
519					2016-06-05
398					2016-06-05
258					2016-06-05
87					2016-06-05
214					2016-06-05
360					2016-06-05
405					2016-06-05
338					2016-06-05
235	16.1	4.58	3.77	503	2016-06-05
254	22.3	4.76	3.65	505	2016-06-05
432					2016-06-05
201					2016-06-05
143					2016-06-05
189	17.6	4.7	3.76	450	2016-06-05
15					2016-06-05
231					2016-06-05
283					2016-06-05
69					2016-06-05
348					2016-06-05
133					2016-06-05
164	15.2	5.42	3.92	424	2016-06-05
167					2016-06-05
111					2016-06-05
71					2016-06-05
402					2016-06-05
644					2016-06-05
10					2016-06-05
472					2016-06-05
35					2016-06-05
65					2016-06-05
429					2016-06-05
171					2016-06-05
294					2016-06-05
381	16.9	4.08	3.57	484	2016-06-05
458					2016-06-05
101	19.2	4.57	3.72	390	2016-06-05
70	23.5	4.49	3.79	453	2016-06-05
79					2016-06-05
431	19.1	5.16	3.68	391	2016-06-05
347					2016-06-05
641					2016-06-05
151					2016-06-05
530	17.1	4.68	3.6	387	2016-06-05
495					2016-06-05
7					2016-06-05
574					2016-06-05
318					2016-06-05
88					2016-06-05
526					2016-06-05
298					2016-06-05
438					2016-06-05
468					2016-06-05
230					2016-06-05
564					2016-06-05
560					2016-06-05
324	23.8	4.55	3.92	453	2016-06-05
259					2016-06-05
13					2016-06-05
225	12.2	4.97	4.62	382	2016-06-05
449	15.4	5.53	4.24	395	2016-06-05
512	8.5	6.22	4.18	437	2016-06-05
368	12.3	6.05	3.86	389	2016-06-05
50	7.9	4.82	4.8	405	2016-06-05
473	8.5	6.9	4.38	386	2016-06-05
244	9.5	7.44	4.17	379	2016-06-05
329	10.2	7.27	4.39	400	2016-06-05
549	6.1	8.55	4.99	537	2016-06-05
373	7.9	9.31	4.66	458	2016-06-05
280					2016-06-05
185					2016-06-05
261	6.7	6.22	4.83	379	2016-06-05
228					2016-06-05
620					2016-06-05
27					2016-06-06
47	16.2	5.36	5		2016-06-06
125	13.3	6.62	4.18	634	2016-06-06
144	27.2	4.33	3.94	541	2016-06-06
253	21.6	5.35	3.88	529	2016-06-06
274	18.9	4.45	3.71	518	2016-06-06
192	12.8	5.54	5.5		2016-06-06
200	32.7	5.03	4.14	575	2016-06-06
361	17.3	6.37	4.43	551	2016-06-06
11	14.6	3.19	4.61		2016-06-06
466	25.8	4.75	3.99	543	2016-06-06
483	16.4	5.43	3.92	462	2016-06-06
632	12.1	6.05	4.24	579	2016-06-06
380	18.2	6.82	4.26	517	2016-06-06
8	23	4.64	5	547	2016-06-06
181	20.8	6.2	3.81	502	2016-06-06
24	26.7	5.98	3.85	596	2016-06-06
36	15.8	5.9	4.11	554	2016-06-06
37	28.1	4	3.63	538	2016-06-06
134	23.5	4.75	3.81	642	2016-06-06
209	24.1	5.8	4	558	2016-06-06
281	19.8	5.02	3.64	568	2016-06-06
269	10.9	6.87	4.34	546	2016-06-06
306	16.8	4.33	4.44	514	2016-06-06
54	18.6	5.5	4.2	503	2016-06-06
537	17.4	5.04	3.92	473	2016-06-06
113	13.9	5.34	3.63	388	2016-06-06
403	18.2	6.39	5.34	502	2016-06-06
188	18.1	4.36	4.01	556	2016-06-06
146	4	0.3	5.33		2016-06-06
384					2016-06-06
494	23	4.07	4.32	490	2016-06-06
183	23.1	4.66	3.62	605	2016-06-06
86	21.3	4.94	4.09	518	2016-06-06
543	18.1	5.78	4.06	579	2016-06-06
544					2016-06-06
547	11.4	6.39	3.95	522	2016-06-06
241	21	6.49	5.38		2016-06-06
410	15.7	5.99	3.83	588	2016-06-06
342	19	4.14	3.36	696	2016-06-06
173	25.9	4.27	3.73	525	2016-06-06
504	13.4	5.8	4.48	483	2016-06-06
179					2016-06-06
389					2016-06-06
2	13.1	4.96	3.83	515	2016-06-06
66	9.4	5.15	3.46	548	2016-06-06
119	16.7	4.93	4.12	474	2016-06-06
366	24.6	4.35	4.02	500	2016-06-06
369	13.3	4.85	4.04	513	2016-06-06
556	18.1	5.33	4.07	512	2016-06-06
291					2016-06-06
352	26.7	5	3.68	533	2016-06-06
292	21	4.98	4.13	468	2016-06-06
100					2016-06-06
490					2016-06-06
42	11.3	6.54	4.64	546	2016-06-06
406	10.4	6.21	4.11	581	2016-06-06
239	15.3	5.01	3.9	512	2016-06-06
103					2016-06-06
508					2016-06-06
195					2016-06-06
219					2016-06-06
267					2016-06-06
382					2016-06-06
477					2016-06-06
377					2016-06-06
216	14	5.57	4.24	467	2016-06-06
344	28.8	4.73	3.78	547	2016-06-06
74	11.6	5.15	4.02	581	2016-06-06
319					2016-06-06
90	23.1	5.04	3.84	624	2016-06-06
98	19.9	4.8	3.52	427	2016-06-06
236					2016-06-06
265	19.6	5.25	4.06	453	2016-06-06
193					2016-06-06
288					2016-06-06
233	11.6	5.52	4.01	533	2016-06-06
437					2016-06-06
385	6.9	5.78	4.49	671	2016-06-06
443	12.2	5.48	3.87	402	2016-06-06
299					2016-06-06
454	14.7	4.87	3.64	528	2016-06-06
553	19.6	4.39	3.53	504	2016-06-06
424					2016-06-06
643	23.6	4.19	3.43	459	2016-06-06
484	20.3	5.02	3.7	486	2016-06-06
89	20.3	4.19	4.02	526	2016-06-06
150	17.4	5.66	4.42	568	2016-06-06
645	17.1	5.33	3.58	470	2016-06-06
38	29.2	4.12	3.83	506	2016-06-06
457	22.1	5	3.84	509	2016-06-06
248	21.2	5.09	3.84	514	2016-06-06
170	14.5	6.28	4.3	582	2016-06-06
640	16.2	4.95	3.82	543	2016-06-06
60	19.4	5.17	3.53	527	2016-06-06
106	16.5	4.9	4.07	437	2016-06-06
379	14.1	5.24	3.8	607	2016-06-06
12	18.7	5.47	3.84	452	2016-06-06
451	16.6	4.23	3.75	473	2016-06-06
517	21.5	4.57	4.37	415	2016-06-06
636	23.2	3.95	3.65	477	2016-06-06
634	14	5.61	4.51	560	2016-06-06
631					2016-06-06
629	16.4	5.77	3.71	525	2016-06-06
627	21.1	4.64	3.84	540	2016-06-06
624	25.7	4.32	3.8	523	2016-06-06
622	12	7.73	4.25	562	2016-06-06
618	16.7	6.27	4.09	520	2016-06-06
579					2016-06-06
140					2016-06-06
523					2016-06-06
211					2016-06-06
375					2016-06-06
234					2016-06-06
359					2016-06-06
121					2016-06-06
392					2016-06-06
278					2016-06-06
346					2016-06-06
135	18.6	5.77	4.23	541	2016-06-06
132	17	3.32	3.73	527	2016-06-06
212	24.3	5.73	3.92	494	2016-06-06
535	22.4	4.88	3.62	519	2016-06-06
257					2016-06-06
453					2016-06-06
58					2016-06-06
323					2016-06-06
602					2016-06-06
485					2016-06-06
205					2016-06-06
114					2016-06-06
540					2016-06-06
411					2016-06-06
246					2016-06-06
528	19.7	4.37	4.04	444	2016-06-06
441					2016-06-06
63					2016-06-06
546					2016-06-06
287	25.4	4.78	3.88	448	2016-06-06
492					2016-06-06
45					2016-06-06
247	19.8	3.97	3.74	415	2016-06-06
336					2016-06-06
400	21.7	4.15	3.81	439	2016-06-06
435					2016-06-06
177	13.5	4.1	3.86	523	2016-06-06
616	18.4	5.1	4.02	428	2016-06-06
1	23	4.8	3.8	418	2016-06-06
393					2016-06-06
518					2016-06-06
251	29.5	4.55	3.59	501	2016-06-06
548	20.5	4.78	4.1	459	2016-06-06
447	15.2	5.85	3.96	604	2016-06-06
491	23.1	4.06	3.79	472	2016-06-06
158	21	5.95	3.9	546	2016-06-06
427	24.6	4.29	3.77	383	2016-06-06
418					2016-06-06
603	25.3	3.7	3.6	429	2016-06-06
604					2016-06-06
107	22.4	3.84	3.54	505	2016-06-06
396					2016-06-06
608					2016-06-06
92	17.6	3.71	3.86	460	2016-06-06
310					2016-06-06
356	12.6	4.66	4.13	519	2016-06-06
169					2016-06-06
470					2016-06-06
104					2016-06-06
426					2016-06-06
425					2016-06-06
480					2016-06-06
499					2016-06-06
433	24.8	5.47	3.92	432	2016-06-06
450					2016-06-06
6					2016-06-06
423					2016-06-06
335					2016-06-06
590					2016-06-06
407					2016-06-06
354					2016-06-06
118	13.7	5.45	3.58	554	2016-06-06
311	24.4	4.48	4.06	533	2016-06-06
421					2016-06-06
314					2016-06-06
245					2016-06-06
614	22.4	4.22	3.37	540	2016-06-06
95					2016-06-06
204	12.7	5.36	4.26	592	2016-06-06
78	19.3	4.4	3.53	572	2016-06-06
428	10.2	5.13	4.03	514	2016-06-06
414	11.2	5.15	4.08	418	2016-06-06
139	16.6	5.46	3.95	421	2016-06-06
178					2016-06-06
625	12.3	6.05	3.89	443	2016-06-06
598	15.7	4.51	3.58	395	2016-06-06
597	12.4	4.55	4.37	358	2016-06-06
208					2016-06-06
343					2016-06-06
64					2016-06-06
117	15.6	4.74	3.62	528	2016-06-06
180	16.3	4.51	3.76	473	2016-06-06
145	14.8	3.35	3.75	421	2016-06-06
633					2016-06-06
46	11.5	4.76	3.91	536	2016-06-06
277	16	5.16	4.12	382	2016-06-06
21					2016-06-06
264	15.1	4.76	3.87	442	2016-06-06
596	16.3	4.07	3.46	454	2016-06-06
175					2016-06-06
650	15.6	5	3.6	435	2016-06-06
142					2016-06-06
161	16.7	4.13	3.84	532	2016-06-06
194					2016-06-06
573					2016-06-06
599	10	4.16	3.61	435	2016-06-06
565	17.2	5.4	3.67	457	2016-06-06
82	14.3	5.3	3.96	468	2016-06-06
4	12	5.53	3.75	419	2016-06-06
476					2016-06-06
430					2016-06-06
498	13.8	5.96	4.28	502	2016-06-06
76	14.3	5.26	4.09	484	2016-06-06
84	12	6.05	4.02	474	2016-06-06
18					2016-06-06
532					2016-06-06
124					2016-06-06
32					2016-06-06
459					2016-06-06
355					2016-06-06
413	12.4	5.55	4.48	481	2016-06-06
545					2016-06-06
474					2016-06-06
404					2016-06-06
112	16.5	4.15	3.06	499	2016-06-06
91					2016-06-06
268	16.2	4.65	3.6	447	2016-06-06
232	17.1	5.28	4.11	576	2016-06-06
153	15.9	5.63	3.88	482	2016-06-06
109	14.1	5.77	3.96	455	2016-06-06
40					2016-06-06
61	21	4.66	3.94	465	2016-06-06
68	18.4	4.9	3.72	430	2016-06-06
286					2016-06-06
394					2016-06-06
52	14.3	5.58	4.24	568	2016-06-06
617	11.8	3.97	3.93	562	2016-06-06
460	19.5	4.04	3.5	492	2016-06-06
307	19.2	5.13	3.51	554	2016-06-06
99	12.5	5.55	4.06	488	2016-06-06
273	16.6	4.21	3.43	453	2016-06-06
295	14.2	4.82	4.06	464	2016-06-06
541					2016-06-06
22					2016-06-06
589	13.6	5.3	3.82	514	2016-06-06
159	15.4	5.21	4.26	407	2016-06-06
14					2016-06-06
519					2016-06-06
398					2016-06-06
258					2016-06-06
87					2016-06-06
214					2016-06-06
360					2016-06-06
405					2016-06-06
338					2016-06-06
235	15.5	4.47	3.79	460	2016-06-06
254	22	4.83	3.66	499	2016-06-06
432					2016-06-06
201					2016-06-06
143					2016-06-06
189	17.5	4.75	3.78	451	2016-06-06
15					2016-06-06
231					2016-06-06
283					2016-06-06
69					2016-06-06
348					2016-06-06
133					2016-06-06
164	14.7	5.2	3.95	427	2016-06-06
167					2016-06-06
111					2016-06-06
71					2016-06-06
402					2016-06-06
644					2016-06-06
10					2016-06-06
472					2016-06-06
35					2016-06-06
65					2016-06-06
429					2016-06-06
171					2016-06-06
294					2016-06-06
381	17.1	4.17	3.55	466	2016-06-06
458					2016-06-06
101	20.7	4.73	3.72	390	2016-06-06
70	24.6	4.6	3.8	445	2016-06-06
79					2016-06-06
431	18.7	5	3.66	390	2016-06-06
347					2016-06-06
641					2016-06-06
151					2016-06-06
530	16.6	4.34	3.65	385	2016-06-06
495					2016-06-06
7					2016-06-06
574					2016-06-06
318					2016-06-06
88					2016-06-06
526					2016-06-06
298					2016-06-06
438					2016-06-06
468					2016-06-06
230					2016-06-06
564					2016-06-06
560					2016-06-06
324	22.1	4.18	3.94	449	2016-06-06
259					2016-06-06
13					2016-06-06
225	12.6	5.04	4.49	382	2016-06-06
449	17.5	5.3	4.03	395	2016-06-06
512	9.5	5.79	4.19	420	2016-06-06
368	12.3	6.53	4	381	2016-06-06
50	7.4	6	4.61	403	2016-06-06
473	8.6	6.38	4.37	378	2016-06-06
244	11.6	6.81	4.25	380	2016-06-06
329	12.5	7.12	4.29	402	2016-06-06
549	7.7	8.38	4.79	534	2016-06-06
373	8.3	7.71	4.44	454	2016-06-06
280					2016-06-06
185					2016-06-06
261	6.2	8.1	5	386	2016-06-06
228	8.6	5.37	5.06		2016-06-06
620					2016-06-06
27					2016-06-07
47	8.9	6.38	5.48	532	2016-06-07
125	13.3	6.44	4.16	632	2016-06-07
144	26.1	4.21	3.95	533	2016-06-07
253	19.9	5.39	3.84	542	2016-06-07
274	19.1	4.47	3.69	517	2016-06-07
192	17.4	7.24	5.43	437	2016-06-07
200	30.7	4.84	4.15	574	2016-06-07
361	17.4	6.13	4.38	570	2016-06-07
11	12.4	5.23	5.23	476	2016-06-07
466	23.7	4.42	3.96	548	2016-06-07
483	16.1	5.38	3.93	471	2016-06-07
632	12	5.87	4.21	582	2016-06-07
380	22.3	6.29	4.09	515	2016-06-07
8	24.5	4.13	4.86	554	2016-06-07
181	20.5	6.13	3.83	496	2016-06-07
24	24.2	6.02	4.02	589	2016-06-07
36	15.7	5.98	4.12	563	2016-06-07
37	27.8	3.92	3.66	531	2016-06-07
134	23.3	4.71	3.82	635	2016-06-07
209	22.3	5.69	4	527	2016-06-07
281	20.4	5.41	3.65	569	2016-06-07
269	11	6.8	4.4	562	2016-06-07
306	16.3	4.24	4.35	511	2016-06-07
54	18.2	5.36	4.19	504	2016-06-07
537	17.1	4.94	3.89	466	2016-06-07
113	13.9	5.41	3.66	391	2016-06-07
[truncated: 7,929 more rows]

## Sheet: July 2016
Animal Number	Day Production	Fat indication	Protein indication	Weight	Date
27	25	5.38	4.81	478	2016-07-01
47	37.4	4.27	3.81	510	2016-07-01
125					2016-07-01
144	25	4.78	3.77	534	2016-07-01
253	20.2	5.25	3.78	543	2016-07-01
274	19.7	3.94	3.42	518	2016-07-01
192	27.5	5.12	4.17	504	2016-07-01
200	32	5.07	4.03	559	2016-07-01
361	20.1	5.55	4.33	563	2016-07-01
11	26.4	5.25	4.11	461	2016-07-01
466	24.4	4.59	3.79	538	2016-07-01
483	17.5	4.41	3.54	464	2016-07-01
632	12.9	5.56	3.82	591	2016-07-01
380	24.1	5.1	3.97	506	2016-07-01
8	35.1	3.34	3.5	544	2016-07-01
181	22.6	5.35	3.57	485	2016-07-01
24	29.8	5.06	3.64	616	2016-07-01
36	15.6	5.24	3.74	572	2016-07-01
37	21.5	3.5	3.65	499	2016-07-01
134	22.4	4.66	3.75	649	2016-07-01
209	22	5.26	3.43	557	2016-07-01
281	22.5	4.76	3.61	561	2016-07-01
269	12	6.23	3.96	559	2016-07-01
306	20.1	4.19	3.82	502	2016-07-01
54	18.5	5.12	3.93	505	2016-07-01
537	19	4.28	3.68	464	2016-07-01
113	17.3	4.99	3.58	388	2016-07-01
403	26.2	3.55	3.69	516	2016-07-01
188	21.3	3.97	3.73	555	2016-07-01
146	22.8	3.64	4.06	495	2016-07-01
384	36.8	4.6	3.99	490	2016-07-01
494	24.6	4.23	4.06	484	2016-07-01
183	24.8	5.49	3.54	613	2016-07-01
86	24.7	4.09	3.66	516	2016-07-01
543	19	5.39	3.68	544	2016-07-01
544					2016-07-01
547	10.7	5.94	3.68	527	2016-07-01
241	29.1	4.06	3.7	474	2016-07-01
410	16.6	5.79	3.66	606	2016-07-01
342	20.8	4.04	3.04	695	2016-07-01
173	26	3.89	3.38	513	2016-07-01
504	12.7	4.3	4.2	489	2016-07-01
179	22.2	4.91	4.04	444	2016-07-01
389					2016-07-01
2	14.4	4.92	3.85	521	2016-07-01
66					2016-07-01
119					2016-07-01
366	26.8	4.41	3.79	487	2016-07-01
369					2016-07-01
556	19.6	4.88	3.94	496	2016-07-01
291					2016-07-01
352	27.1	4.91	3.47	560	2016-07-01
292	22	5.45	3.79	520	2016-07-01
100	23.9	4	4.34	554	2016-07-01
490	30.3	4.66	4.22	569	2016-07-01
42					2016-07-01
406					2016-07-01
239					2016-07-01
103	26.4	5.12	4.72	479	2016-07-01
508					2016-07-01
195					2016-07-01
219					2016-07-01
267					2016-07-01
382					2016-07-01
477					2016-07-01
377					2016-07-01
216	14.1	5.23	3.95	473	2016-07-01
344	30.8	4.41	3.78	538	2016-07-01
74	12	4.97	3.7	579	2016-07-01
319					2016-07-01
90	24.6	3.95	3.68	593	2016-07-01
98	21	4.36	3.27	431	2016-07-01
236					2016-07-01
265	21.5	4.89	3.85	450	2016-07-01
193					2016-07-01
288					2016-07-01
233	12.8	5.36	3.85	541	2016-07-01
437					2016-07-01
385					2016-07-01
443	12.5	5.23	3.68	393	2016-07-01
299					2016-07-01
454	15.3	4.47	3.29	523	2016-07-01
553	21.5	4.27	3.41	505	2016-07-01
424					2016-07-01
643	21.7	4	3.02	462	2016-07-01
484	21	4.62	3.46	480	2016-07-01
89	20.7	3.74	3.76	514	2016-07-01
150	19.4	5.73	4.19	556	2016-07-01
645	18.1	5.27	3.5	471	2016-07-01
38	34.9	3.93	3.69	499	2016-07-01
457	24.5	4.83	3.6	507	2016-07-01
248	21.7	4.67	3.69	502	2016-07-01
170	14.7	5.14	3.87	584	2016-07-01
640	19.3	4.24	3.65	566	2016-07-01
60	11.6	5.09	3.33	530	2016-07-01
106	18.5	4.97	3.8	431	2016-07-01
379	14.2	5.12	3.43	602	2016-07-01
12	22.1	4.8	3.64	493	2016-07-01
451	18.1	3.58	3.49	465	2016-07-01
517	23.3	4.68	4.11	402	2016-07-01
636	25.5	3.68	3.35	460	2016-07-01
634	15.6	4.77	4.13	567	2016-07-01
631					2016-07-01
629	17.8	5.4	3.69	523	2016-07-01
627	28.5	4.05	3.72	505	2016-07-01
624	23.5	4.3	3.53	483	2016-07-01
622	13.1	5.1	3.78	554	2016-07-01
618	19.9	5.46	3.86	546	2016-07-01
579					2016-07-01
140					2016-07-01
523					2016-07-01
211					2016-07-01
375					2016-07-01
234					2016-07-01
359					2016-07-01
121					2016-07-01
392					2016-07-01
278					2016-07-01
346					2016-07-01
135	23.1	5.52	3.99	540	2016-07-01
132	20.8	3.05	3.67	524	2016-07-01
212	25	5.53	3.94	471	2016-07-01
535	24.4	4.79	3.49	515	2016-07-01
257					2016-07-01
453					2016-07-01
58					2016-07-01
323					2016-07-01
602					2016-07-01
485					2016-07-01
205					2016-07-01
114					2016-07-01
540					2016-07-01
411					2016-07-01
246					2016-07-01
528	19.5	5.37	3.98	428	2016-07-01
441					2016-07-01
63					2016-07-01
546					2016-07-01
287	12.7	5.34	3.91	405	2016-07-01
492					2016-07-01
45					2016-07-01
247	14.1	3.86	3.63	394	2016-07-01
336					2016-07-01
400	25.8	4.44	3.01	417	2016-07-01
435					2016-07-01
177	13.4	4.29	3.59	535	2016-07-01
616	21	4.4	3.7	431	2016-07-01
1	26.5	4.37	3.6	430	2016-07-01
393					2016-07-01
518					2016-07-01
251	31.3	4.23	3.53	493	2016-07-01
548	22.3	4.89	3.91	431	2016-07-01
447	17	4.34	3.61	565	2016-07-01
491	24.9	3.99	3.58	450	2016-07-01
158	25.4	5.07	3.89	533	2016-07-01
427	25.3	4.58	3.71	376	2016-07-01
418	23.9	4.72	4.16	508	2016-07-01
603	27.1	4.13	3.4	411	2016-07-01
604					2016-07-01
107	22.5	4.05	3.42	499	2016-07-01
396					2016-07-01
608					2016-07-01
92	18.7	3.43	3.67	460	2016-07-01
310					2016-07-01
356					2016-07-01
169					2016-07-01
470					2016-07-01
104					2016-07-01
426					2016-07-01
425					2016-07-01
480					2016-07-01
499					2016-07-01
433	25.3	4.77	3.67	465	2016-07-01
450					2016-07-01
6					2016-07-01
423					2016-07-01
335					2016-07-01
590					2016-07-01
407					2016-07-01
354					2016-07-01
118	15.5	4.98	3.38	555	2016-07-01
311	28	3.62	3.87	545	2016-07-01
421					2016-07-01
314					2016-07-01
245	27.9	4.68	5.35		2016-07-01
614	23.4	3.99	3.16	546	2016-07-01
95					2016-07-01
204					2016-07-01
78	23.1	3.64	3.39	558	2016-07-01
428					2016-07-01
414					2016-07-01
139	16.2	5.03	3.93	437	2016-07-01
178					2016-07-01
625					2016-07-01
598	17.8	4.07	3.27	400	2016-07-01
597					2016-07-01
208					2016-07-01
343					2016-07-01
64					2016-07-01
117	14.9	5	3.41	530	2016-07-01
180	16.6	4.6	3.5	475	2016-07-01
145	16.2	3.21	3.41	418	2016-07-01
633					2016-07-01
46	12.1	4.46	3.58	546	2016-07-01
277	15.1	4.62	4.03	412	2016-07-01
21					2016-07-01
264	18.1	4.2	3.69	446	2016-07-01
596	17	3.9	3.03	444	2016-07-01
175					2016-07-01
650	17.4	4.66	3.39	449	2016-07-01
142					2016-07-01
161	18.7	3.67	3.47	544	2016-07-01
194					2016-07-01
573					2016-07-01
599					2016-07-01
565	16	4.64	3.51	456	2016-07-01
82	16.1	4.46	3.63	462	2016-07-01
4	12.5	5.38	3.41	415	2016-07-01
476					2016-07-01
430					2016-07-01
498	14.3	6.03	4.09	508	2016-07-01
76	15.9	4.42	3.82	477	2016-07-01
84	12.5	5.77	3.78	480	2016-07-01
18					2016-07-01
532					2016-07-01
124					2016-07-01
32					2016-07-01
459					2016-07-01
355					2016-07-01
413	14.1	5.4	4.21	480	2016-07-01
545					2016-07-01
474					2016-07-01
404					2016-07-01
112	13.7	4.83	2.96	506	2016-07-01
91					2016-07-01
268	17.4	4.36	3.44	460	2016-07-01
232	18.8	4.9	3.83	541	2016-07-01
153	20.9	4.05	3.65	481	2016-07-01
109	13.8	5.43	3.86	461	2016-07-01
40					2016-07-01
61	23.2	4.64	3.89	469	2016-07-01
68	17	4.71	3.4	436	2016-07-01
286					2016-07-01
394					2016-07-01
52	14.9	5.58	4.12	541	2016-07-01
617	12.3	4.02	3.72	564	2016-07-01
460	19.9	3.67	3.13	498	2016-07-01
307	19.1	4.95	3.26	574	2016-07-01
99	14.1	5.15	3.76	486	2016-07-01
273	17.7	3.61	3.23	454	2016-07-01
295	14.4	4.82	3.81	479	2016-07-01
541					2016-07-01
22					2016-07-01
589	12.5	5.04	3.49	526	2016-07-01
159	10.2	5.32	4.05	387	2016-07-01
14					2016-07-01
519					2016-07-01
398					2016-07-01
258					2016-07-01
87					2016-07-01
214					2016-07-01
360					2016-07-01
405					2016-07-01
338					2016-07-01
235	15.7	4.41	3.47	462	2016-07-01
254	23.3	4.5	3.47	500	2016-07-01
432					2016-07-01
201					2016-07-01
143					2016-07-01
189	16.1	4.6	3.64	437	2016-07-01
15					2016-07-01
231					2016-07-01
283					2016-07-01
69					2016-07-01
348					2016-07-01
133					2016-07-01
164	12.6	4.94	3.93	430	2016-07-01
167					2016-07-01
111					2016-07-01
71					2016-07-01
402					2016-07-01
644					2016-07-01
10					2016-07-01
472					2016-07-01
35					2016-07-01
65					2016-07-01
429					2016-07-01
171					2016-07-01
294					2016-07-01
381	17.9	4.39	3.47	480	2016-07-01
458					2016-07-01
101	20.2	5	3.76	399	2016-07-01
70	24.6	4.79	3.64	445	2016-07-01
79					2016-07-01
431	19.1	4.83	3.48	454	2016-07-01
347					2016-07-01
641					2016-07-01
151					2016-07-01
530	16.1	4.49	3.75	394	2016-07-01
495					2016-07-01
7					2016-07-01
574					2016-07-01
318					2016-07-01
88					2016-07-01
526					2016-07-01
298					2016-07-01
438					2016-07-01
468					2016-07-01
230					2016-07-01
564					2016-07-01
560					2016-07-01
324	24.7	3.93	3.4	451	2016-07-01
259					2016-07-01
13					2016-07-01
225	10.1	3.91	3.56	359	2016-07-01
449	20.4	3.04	3.42	392	2016-07-01
512					2016-07-01
368	13.7	4.38	3.49	401	2016-07-01
50					2016-07-01
473					2016-07-01
244					2016-07-01
329	13.2	4.22	3.72	416	2016-07-01
549					2016-07-01
373					2016-07-01
280					2016-07-01
185					2016-07-01
261	16.8	4	3.44	421	2016-07-01
228	29.3	4.26	3.37	440	2016-07-01
620	19.2	4.11	3.34	409	2016-07-01
562					2016-07-01
479	25.6	4.67	3.73	495	2016-07-01
149					2016-07-01
349					2016-07-01
27	26.4	4.96	4.67	478	2016-07-02
47	36	3.83	3.84	519	2016-07-02
125					2016-07-02
144	22.1	4.11	3.84	564	2016-07-02
253	20.7	4.96	3.72	545	2016-07-02
274	20.6	3.95	3.41	515	2016-07-02
192	27	4.93	4.13	502	2016-07-02
200	29.6	5.24	4.03	559	2016-07-02
361	20.4	5.37	4.3	570	2016-07-02
11	26.2	4.96	4.12	459	2016-07-02
466	24.3	4.77	3.77	541	2016-07-02
483	17.5	4.39	3.51	466	2016-07-02
632	12.3	5.33	3.82	613	2016-07-02
380	25	5.33	3.96	511	2016-07-02
8	35.3	3.39	3.46	562	2016-07-02
181	22.4	5.51	3.55	489	2016-07-02
24	31.2	5.29	3.65	611	2016-07-02
36	15.3	5.24	3.71	570	2016-07-02
37	24.1	3.45	3.65	506	2016-07-02
134	23	4.37	3.71	644	2016-07-02
209	22.8	5.12	3.34	555	2016-07-02
281	23.4	4.64	3.52	567	2016-07-02
269	10.6	6.14	3.93	562	2016-07-02
306	20	4.38	3.86	500	2016-07-02
54	18.4	5.07	3.92	485	2016-07-02
537	19.4	4.35	3.66	464	2016-07-02
113	17	4.9	3.59	390	2016-07-02
403	27.1	3.46	3.7	512	2016-07-02
188	20.8	4.12	3.75	553	2016-07-02
146	23.7	3.84	4.04	498	2016-07-02
384	37.5	4.68	3.91	479	2016-07-02
494	25.1	4.11	3.98	497	2016-07-02
183	25	4.98	3.55	584	2016-07-02
86	23.9	4.26	3.64	514	2016-07-02
543	18.7	5.42	3.72	567	2016-07-02
544					2016-07-02
547	10.9	5.6	3.67	534	2016-07-02
241	28.4	4.24	3.74	472	2016-07-02
410	17.4	5.68	3.63	609	2016-07-02
342	20.8	3.95	2.96	692	2016-07-02
173	26.5	3.76	3.13	512	2016-07-02
504	13.6	4.44	4.16	555	2016-07-02
179	21.7	4.63	4.01	454	2016-07-02
389					2016-07-02
2	14.7	4.95	3.82	527	2016-07-02
66					2016-07-02
119					2016-07-02
366	25.4	4.25	3.79	471	2016-07-02
369					2016-07-02
556	20.3	4.77	3.92	500	2016-07-02
291					2016-07-02
352	26.8	4.45	3.49	519	2016-07-02
292	21.8	5.12	3.87	459	2016-07-02
100	24.2	4.31	4.32	563	2016-07-02
490	32.3	4.41	4.15	577	2016-07-02
42					2016-07-02
406					2016-07-02
239					2016-07-02
103	27.4	4.8	4.5	481	2016-07-02
508					2016-07-02
195					2016-07-02
219					2016-07-02
267					2016-07-02
382					2016-07-02
477					2016-07-02
377					2016-07-02
216	14.3	4.88	3.89	463	2016-07-02
344	30.5	4.18	3.77	568	2016-07-02
74	11.9	5.05	3.7	586	2016-07-02
319					2016-07-02
90	25	3.82	3.71	604	2016-07-02
98	20.7	4.34	3.29	436	2016-07-02
236					2016-07-02
265	21.1	4.72	3.69	440	2016-07-02
193					2016-07-02
288					2016-07-02
233	13.5	5.22	3.8	544	2016-07-02
437					2016-07-02
385					2016-07-02
443	13.4	5.25	3.65	387	2016-07-02
299					2016-07-02
454	15.8	4.38	3.29	533	2016-07-02
553	20.8	4.15	3.37	503	2016-07-02
424					2016-07-02
643	23.5	4.03	3.04	468	2016-07-02
484	20.9	4.74	3.49	479	2016-07-02
89	21.2	3.69	3.69	514	2016-07-02
150	18.3	5.47	4.18	554	2016-07-02
645	17.6	5.31	3.49	470	2016-07-02
38	34.1	4.03	3.6	494	2016-07-02
457	26.3	4.42	3.62	580	2016-07-02
248	22.7	4.53	3.66	507	2016-07-02
170	13.8	4.82	3.84	577	2016-07-02
640	18.1	4.54	3.69	557	2016-07-02
60	11.4	5.06	3.31	542	2016-07-02
106	18.2	4.7	3.79	432	2016-07-02
379	14.8	5.27	3.46	610	2016-07-02
12	20.7	4.67	3.67	456	2016-07-02
451	16.9	3.72	3.49	472	2016-07-02
517	24.1	4.76	4.1	402	2016-07-02
636	25.5	3.76	3.31	456	2016-07-02
634	15.8	4.66	4.07	570	2016-07-02
631					2016-07-02
629	16.8	5.46	3.63	520	2016-07-02
627	26.4	3.55	3.71	513	2016-07-02
624	22.6	4.24	3.49	472	2016-07-02
622	11.9	5.27	3.8	572	2016-07-02
618	18.4	5.47	3.86	546	2016-07-02
579					2016-07-02
140					2016-07-02
523					2016-07-02
211					2016-07-02
375					2016-07-02
234					2016-07-02
359					2016-07-02
121					2016-07-02
392					2016-07-02
278					2016-07-02
346					2016-07-02
135	22.7	5.31	4.02	538	2016-07-02
132	19.3	2.59	3.65	518	2016-07-02
212	24.2	5.43	3.9	478	2016-07-02
535	24.5	4.67	3.5	512	2016-07-02
257					2016-07-02
453					2016-07-02
58					2016-07-02
323					2016-07-02
602					2016-07-02
485					2016-07-02
205					2016-07-02
114					2016-07-02
540					2016-07-02
411					2016-07-02
246					2016-07-02
528	20.1	5.16	3.94	452	2016-07-02
441					2016-07-02
63					2016-07-02
546					2016-07-02
287	16.3	5.44	3.84	394	2016-07-02
492					2016-07-02
45					2016-07-02
247	12.8	4.21	3.57	405	2016-07-02
336					2016-07-02
400	26.5	4.01	3.16	412	2016-07-02
435					2016-07-02
177	13.7	4.08	3.58	539	2016-07-02
616	19.9	4.31	3.68	431	2016-07-02
1	24.8	4.59	3.59	429	2016-07-02
393					2016-07-02
518					2016-07-02
251	30.1	4.33	3.55	485	2016-07-02
548	23.3	5.18	3.88	447	2016-07-02
447	16.4	4.6	3.57	573	2016-07-02
491	25.1	4.21	3.53	466	2016-07-02
158	23.8	4.98	3.86	578	2016-07-02
427	26.1	4.7	3.74	373	2016-07-02
418	23.2	4.6	4.15	500	2016-07-02
603	27.2	3.96	3.37	414	2016-07-02
604					2016-07-02
107	22.3	3.96	3.43	486	2016-07-02
396					2016-07-02
608					2016-07-02
92	18.3	3.5	3.72	523	2016-07-02
310					2016-07-02
356					2016-07-02
169					2016-07-02
470					2016-07-02
104					2016-07-02
426					2016-07-02
425					2016-07-02
480					2016-07-02
499					2016-07-02
433	24.6	4.54	3.7	431	2016-07-02
450					2016-07-02
6					2016-07-02
423					2016-07-02
335					2016-07-02
590					2016-07-02
407					2016-07-02
354					2016-07-02
118	16.1	4.78	3.37	567	2016-07-02
311	27.1	3.45	3.85	555	2016-07-02
421					2016-07-02
314					2016-07-02
245	19.2	6.25	5.14	607	2016-07-02
614	24.9	4.01	3.16	544	2016-07-02
95					2016-07-02
204					2016-07-02
78	24.6	3.4	3.34	573	2016-07-02
428					2016-07-02
414					2016-07-02
139	15.8	5.15	3.92	447	2016-07-02
178					2016-07-02
625					2016-07-02
598	17	4.09	3.27	443	2016-07-02
597	13.4	4.13	3.98		2016-07-02
208					2016-07-02
343					2016-07-02
64					2016-07-02
117	15	5.06	3.36	534	2016-07-02
180	17	4.33	3.49	477	2016-07-02
145	15.9	3.04	3.4	432	2016-07-02
633					2016-07-02
46	12.4	4.39	3.58	553	2016-07-02
277	14.6	4.28	4.04	406	2016-07-02
21					2016-07-02
264	17.8	4.16	3.7	443	2016-07-02
596	17.3	3.73	3.02	511	2016-07-02
175					2016-07-02
650	17.3	4.71	3.4	447	2016-07-02
142					2016-07-02
161	18.8	3.79	3.48	541	2016-07-02
194					2016-07-02
573					2016-07-02
599					2016-07-02
565	16.7	4.62	3.5	450	2016-07-02
82	16.3	4.55	3.63	467	2016-07-02
4	13.3	5.44	3.46	417	2016-07-02
476					2016-07-02
430					2016-07-02
498	15	5.94	4.05	505	2016-07-02
76	15.4	4.39	3.84	471	2016-07-02
84	12.7	5.77	3.8	477	2016-07-02
18					2016-07-02
532					2016-07-02
124					2016-07-02
32					2016-07-02
459					2016-07-02
355					2016-07-02
413	13.7	4.73	4.22	488	2016-07-02
545					2016-07-02
474					2016-07-02
404					2016-07-02
112	15.5	4.54	2.87	495	2016-07-02
91					2016-07-02
268	18.9	4.23	3.44	461	2016-07-02
232	18.4	4.65	3.72	531	2016-07-02
153	20.2	3.73	3.54	477	2016-07-02
109	14.7	5.7	3.81	449	2016-07-02
40					2016-07-02
61	23	4.64	3.91	475	2016-07-02
68	16.2	4.65	3.42	636	2016-07-02
286					2016-07-02
394					2016-07-02
52	15.1	5.55	4.09	541	2016-07-02
617	12.3				2016-07-02
460	20.1	3.55	3.13	503	2016-07-02
307	17.7	4.83	3.28	573	2016-07-02
99	13.6	5.16	3.77	491	2016-07-02
273	17.4	3.69	3.24	447	2016-07-02
295	15.2	4.81	3.81	476	2016-07-02
541					2016-07-02
22					2016-07-02
589	11.8	5.03	3.52	519	2016-07-02
159	10.4	5.24	4.07	388	2016-07-02
14					2016-07-02
519					2016-07-02
398					2016-07-02
258					2016-07-02
87					2016-07-02
214					2016-07-02
360					2016-07-02
405					2016-07-02
338					2016-07-02
235	15.8	4.28	3.47	470	2016-07-02
254	23.1	4.27	3.38	493	2016-07-02
432					2016-07-02
201					2016-07-02
143					2016-07-02
189	16.8	4.92	3.6	473	2016-07-02
15					2016-07-02
231					2016-07-02
283					2016-07-02
69					2016-07-02
348					2016-07-02
133					2016-07-02
164	12.9	4.79	3.87	425	2016-07-02
167					2016-07-02
111					2016-07-02
71					2016-07-02
402					2016-07-02
644					2016-07-02
10					2016-07-02
472					2016-07-02
35					2016-07-02
65					2016-07-02
429					2016-07-02
171					2016-07-02
294					2016-07-02
381	17.8	4.33	3.43	475	2016-07-02
458					2016-07-02
101	17.3	4.84	3.78	638	2016-07-02
70	25.1	4.88	3.69	437	2016-07-02
79					2016-07-02
431	19.1	4.72	3.48	393	2016-07-02
347					2016-07-02
641					2016-07-02
151					2016-07-02
530	16.6	4.43	3.75	406	2016-07-02
495					2016-07-02
7					2016-07-02
574					2016-07-02
318					2016-07-02
88					2016-07-02
526					2016-07-02
298					2016-07-02
438					2016-07-02
468					2016-07-02
230					2016-07-02
564					2016-07-02
560					2016-07-02
324	25.1	3.89	3.41	449	2016-07-02
259					2016-07-02
13					2016-07-02
225	10.4	4.01	3.52	369	2016-07-02
449	20.8	3.1	3.41	392	2016-07-02
512					2016-07-02
368	11.7	4.31	3.41	504	2016-07-02
50					2016-07-02
473					2016-07-02
244					2016-07-02
329	11	3.84	3.65	420	2016-07-02
549					2016-07-02
373					2016-07-02
280					2016-07-02
185					2016-07-02
261	17.7	4.33	3.44	407	2016-07-02
228	29.6	4.17	3.4	437	2016-07-02
620	20.3	4.23	3.19	403	2016-07-02
562					2016-07-02
479	25.9	4.55	3.71	488	2016-07-02
149					2016-07-02
349					2016-07-02
27	27.4	5	4.57	520	2016-07-03
47	37.5	3.88	3.8	525	2016-07-03
125					2016-07-03
144	24.9	4.23	3.88	539	2016-07-03
253	20.5	4.98	3.71	492	2016-07-03
274	20.5	4.04	3.33	501	2016-07-03
192	27.1	5.01	4.11	506	2016-07-03
200	30.1	5.02	3.92	561	2016-07-03
361	21	5.82	4.32	562	2016-07-03
11	25.7	4.56	4.17	461	2016-07-03
466	24.5	4.81	3.73	538	2016-07-03
483	17.9	4.51	3.54	462	2016-07-03
632	10.8	5.49	3.79	604	2016-07-03
380	25.6	5.27	3.95	521	2016-07-03
8	36.7	3.55	3.46	550	2016-07-03
181	22.8	5.51	3.52	494	2016-07-03
24	31	5.62	3.69	619	2016-07-03
36	15.8	5.11	3.64	571	2016-07-03
37	31.9	4.18	3.53	512	2016-07-03
134	23.4	4.59	3.72	654	2016-07-03
209	23.8	5.21	3.36	570	2016-07-03
281	23	4.96	3.49	575	2016-07-03
269	12	6.39	3.91	561	2016-07-03
306	19.6	4.51	3.85	503	2016-07-03
54	18.9	5.07	3.89	518	2016-07-03
537	19.7	4.51	3.58	471	2016-07-03
113	17.5	5.04	3.57	391	2016-07-03
403	26.7	3.29	3.76	504	2016-07-03
188	19.7	4.19	3.76	552	2016-07-03
146	22.4	3.98	4.05	501	2016-07-03
384	38.9	4.57	3.88	495	2016-07-03
494	26.5	4.47	3.94	499	2016-07-03
183	30.3	5.29	3.46	614	2016-07-03
86	23.8	4.73	3.63	503	2016-07-03
543	18.8	5.37	3.67	563	2016-07-03
544					2016-07-03
547	10.2	5.67	3.68	537	2016-07-03
241	28.1	4.29	3.72	472	2016-07-03
410	17.6	5.4	3.53	590	2016-07-03
342	20.7	3.74	3.04	707	2016-07-03
173	28	3.8	3.08	518	2016-07-03
504	13	4.67	4.14	481	2016-07-03
179	23.5	5.14	4.05	460	2016-07-03
389					2016-07-03
2	14.8	5.02	3.79	524	2016-07-03
66					2016-07-03
119					2016-07-03
366	26.6	4.34	3.76	488	2016-07-03
369					2016-07-03
556	20.2	4.88	3.86	505	2016-07-03
291					2016-07-03
352	25.8	4.72	3.51	514	2016-07-03
292	21.9	4.93	3.9	460	2016-07-03
100	25.1	4.27	4.2	600	2016-07-03
490	31.6	4.7	4.13	593	2016-07-03
42					2016-07-03
406					2016-07-03
239					2016-07-03
103	28.5	4.73	4.3	485	2016-07-03
508					2016-07-03
195					2016-07-03
219					2016-07-03
267					2016-07-03
382					2016-07-03
477					2016-07-03
377					2016-07-03
216	14.6	5.07	3.87	470	2016-07-03
344	30.4	4.3	3.79	544	2016-07-03
74	12.9	4.81	3.67	579	2016-07-03
319					2016-07-03
90	25.1	3.89	3.73	596	2016-07-03
98	19.8	4.42	3.33	414	2016-07-03
236					2016-07-03
265	21.1	4.93	3.59	452	2016-07-03
193					2016-07-03
288					2016-07-03
233	13.3	5.44	3.77	545	2016-07-03
437					2016-07-03
385					2016-07-03
443	13.6	5.04	3.59	398	2016-07-03
299					2016-07-03
454	15.2	4.58	3.31	502	2016-07-03
553	20	4.05	3.35	506	2016-07-03
424					2016-07-03
643	22.8	4.13	3.08	463	2016-07-03
484	21.4	4.88	3.5	459	2016-07-03
89	20.1	3.65	3.73	527	2016-07-03
150	19.3	5.74	4.18	556	2016-07-03
645	17	5.26	3.46	498	2016-07-03
38	32.4	3.97	3.55	501	2016-07-03
457	26.3	4.77	3.58	494	2016-07-03
248	21.8	4.56	3.67	517	2016-07-03
170	13.8	5.17	3.87	568	2016-07-03
640	18.3	4.66	3.64	564	2016-07-03
60	11.2	5.38	3.29	518	2016-07-03
106	18	4.75	3.8	430	2016-07-03
379	14.9	5.06	3.44	602	2016-07-03
12	21.1	4.87	3.65	451	2016-07-03
451	16.7	3.8	3.46	476	2016-07-03
517	23.7	4.96	4.06	405	2016-07-03
636	26.1	3.81	3.33	472	2016-07-03
634	16.5	4.56	3.99	562	2016-07-03
631					2016-07-03
629	17.6	5.56	3.57	527	2016-07-03
627	28.6	3.97	3.69	511	2016-07-03
624	23.9	4.22	3.47	546	2016-07-03
622	13	5.72	3.74	548	2016-07-03
618	18.9	5.27	3.8	539	2016-07-03
579					2016-07-03
140					2016-07-03
523					2016-07-03
211					2016-07-03
375					2016-07-03
234					2016-07-03
359					2016-07-03
121					2016-07-03
392					2016-07-03
278					2016-07-03
346					2016-07-03
135	22.4	5.31	4.02	543	2016-07-03
132	21.6	3.38	3.54	534	2016-07-03
212	25.1	5.33	3.84	495	2016-07-03
535	23.5	4.59	3.47	506	2016-07-03
257					2016-07-03
453					2016-07-03
58					2016-07-03
323					2016-07-03
602					2016-07-03
485					2016-07-03
205					2016-07-03
114					2016-07-03
540					2016-07-03
411					2016-07-03
246					2016-07-03
528	19.1	5.04	3.89	465	2016-07-03
441					2016-07-03
63					2016-07-03
546					2016-07-03
287	16.2	5.58	3.86	401	2016-07-03
492					2016-07-03
45					2016-07-03
247	14.2	4.84	3.41	388	2016-07-03
336					2016-07-03
400	26.2	4.07	3.22	413	2016-07-03
435					2016-07-03
177	13.4	4.07	3.61	540	2016-07-03
616	20.2	4.55	3.65	448	2016-07-03
1	23.7	4.35	3.67	433	2016-07-03
393					2016-07-03
518					2016-07-03
251	30.1	4.42	3.58	498	2016-07-03
548	24.3	5.38	3.84	475	2016-07-03
447	17.8	5.12	3.46	584	2016-07-03
491	24.7	4.08	3.56	465	2016-07-03
158	24	5.27	3.8	540	2016-07-03
427	23.7	4.47	3.73	383	2016-07-03
418	23.3	4.85	4.11	508	2016-07-03
603	27.3	4.11	3.39	412	2016-07-03
604					2016-07-03
107	21.3	4.13	3.47	493	2016-07-03
396					2016-07-03
608					2016-07-03
92	18.2	3.66	3.7	469	2016-07-03
310					2016-07-03
356					2016-07-03
169					2016-07-03
470					2016-07-03
104					2016-07-03
426					2016-07-03
425					2016-07-03
480					2016-07-03
499					2016-07-03
433	24.3	5.03	3.72	441	2016-07-03
450					2016-07-03
6					2016-07-03
423					2016-07-03
335					2016-07-03
590					2016-07-03
407					2016-07-03
354					2016-07-03
118	15.1	4.77	3.37	562	2016-07-03
311	26.5	3.43	3.88	542	2016-07-03
421					2016-07-03
314					2016-07-03
245	24.2	6.73	4.82	622	2016-07-03
614	25.1	4.06	3.14	547	2016-07-03
95					2016-07-03
204					2016-07-03
78	24.2	3.41	3.33	577	2016-07-03
428					2016-07-03
414					2016-07-03
139	15.8	5.14	3.93	446	2016-07-03
178					2016-07-03
625					2016-07-03
598	17.5	4.12	3.31	401	2016-07-03
597	12.9	3.73	3.99	361	2016-07-03
208					2016-07-03
343					2016-07-03
64					2016-07-03
117	15.2	4.97	3.3	538	2016-07-03
180	17.1	4.45	3.45	476	2016-07-03
145	15.2	3.03	3.41	421	2016-07-03
633					2016-07-03
46	12.5	4.59	3.58	545	2016-07-03
277	15.1	4.36	4.02	410	2016-07-03
21					2016-07-03
264	17.5	4.37	3.71	445	2016-07-03
596	17.2	3.83	3.02	448	2016-07-03
175					2016-07-03
650	15	4.6	3.42	452	2016-07-03
142					2016-07-03
161	18.8	3.84	3.49	544	2016-07-03
194					2016-07-03
573					2016-07-03
599					2016-07-03
565	16.5	4.87	3.54	456	2016-07-03
82	16.4	4.75	3.61	471	2016-07-03
4	11.6	5.1	3.42	412	2016-07-03
476					2016-07-03
430					2016-07-03
498	14.5	6.21	4.05	502	2016-07-03
76	14.3	4.77	3.84	480	2016-07-03
84	13.8	5.76	3.81	481	2016-07-03
18					2016-07-03
532					2016-07-03
124					2016-07-03
32					2016-07-03
459					2016-07-03
355					2016-07-03
413	14.4	4.69	4.21	472	2016-07-03
545					2016-07-03
474					2016-07-03
404					2016-07-03
112	16.9	4.56	2.88	524	2016-07-03
91					2016-07-03
268	18.2	4.32	3.47	467	2016-07-03
232	19.3	4.62	3.51	538	2016-07-03
153	20.1	3.72	3.45	477	2016-07-03
109	14.7	5.8	3.75	463	2016-07-03
40					2016-07-03
61	23.5	4.52	3.93	468	2016-07-03
68	15.9	4.25	3.45	440	2016-07-03
286					2016-07-03
394					2016-07-03
52	14.5	5.34	4.1	532	2016-07-03
617	9.2	3.89	3.73	558	2016-07-03
460	21.3	3.56	3.11	517	2016-07-03
307	17	4.87	3.3	591	2016-07-03
99	14	5.22	3.69	491	2016-07-03
273	17.3	3.59	3.22	458	2016-07-03
295	14.7	4.8	3.78	474	2016-07-03
541					2016-07-03
22					2016-07-03
589	11.7	4.91	3.49	532	2016-07-03
159	11.4	5.43	4.07	388	2016-07-03
14					2016-07-03
519					2016-07-03
398					2016-07-03
258					2016-07-03
87					2016-07-03
214					2016-07-03
360					2016-07-03
405					2016-07-03
338					2016-07-03
235	15.4	4.36	3.53	461	2016-07-03
254	23.3	4.51	3.32	501	2016-07-03
432					2016-07-03
201					2016-07-03
143					2016-07-03
189	18.1	4.9	3.57	447	2016-07-03
15					2016-07-03
231					2016-07-03
283					2016-07-03
69					2016-07-03
348					2016-07-03
133					2016-07-03
164	12.8	4.95	3.9	435	2016-07-03
167					2016-07-03
111					2016-07-03
71					2016-07-03
402					2016-07-03
644					2016-07-03
10					2016-07-03
472					2016-07-03
35					2016-07-03
65					2016-07-03
429					2016-07-03
171					2016-07-03
294					2016-07-03
381	18	4.1	3.35	477	2016-07-03
458					2016-07-03
101	14.3	5.07	3.83	409	2016-07-03
70	25.5	5.13	3.71	435	2016-07-03
79					2016-07-03
431	19.6	4.9	3.51	389	2016-07-03
347					2016-07-03
641					2016-07-03
151					2016-07-03
530	17.6	4.59	3.74	392	2016-07-03
495					2016-07-03
7					2016-07-03
574					2016-07-03
318					2016-07-03
88					2016-07-03
526					2016-07-03
298					2016-07-03
438					2016-07-03
468					2016-07-03
230					2016-07-03
564					2016-07-03
560					2016-07-03
324	26.4	4.08	3.43	464	2016-07-03
259					2016-07-03
13					2016-07-03
225	8.8	4.27	3.44	371	2016-07-03
449	18.3	3.32	3.38	395	2016-07-03
512					2016-07-03
368	12.2	4.31	3.29	402	2016-07-03
50					2016-07-03
473					2016-07-03
244					2016-07-03
329	12	4.08	3.61	424	2016-07-03
549					2016-07-03
373					2016-07-03
280					2016-07-03
185					2016-07-03
261	18.2	4.22	3.52	407	2016-07-03
228	27.4	4.28	3.38	430	2016-07-03
620	21.1	3.97	3.24	466	2016-07-03
562					2016-07-03
479	25.5	4.57	3.65	485	2016-07-03
149					2016-07-03
349					2016-07-03
27	29	5.17	4.43	473	2016-07-04
47	37.1	4.46	3.8	517	2016-07-04
125					2016-07-04
144	22.1	3.93	3.78	535	2016-07-04
253	20.4	5.09	3.7	523	2016-07-04
274	20	4.09	3.34	497	2016-07-04
192	29.3	4.64	4	512	2016-07-04
200	28.9	4.84	3.91	546	2016-07-04
361	20.5	5.91	4.31	569	2016-07-04
11	26.9	5.13	4.12	460	2016-07-04
466	23.4	5.11	3.72	519	2016-07-04
483	16.7	4.51	3.59	468	2016-07-04
632	11.7	5.71	3.76	593	2016-07-04
380	25.8	5.29	4.04	522	2016-07-04
8	36.4	3.36	3.45	561	2016-07-04
181	23.1	5.35	3.51	491	2016-07-04
24	31.2	5.53	3.69	603	2016-07-04
36	15.3	5.19	3.59	572	2016-07-04
37	29.1	4.23	3.57	508	2016-07-04
134	23.5	4.7	3.7	618	2016-07-04
209	24.3	5.01	3.48	564	2016-07-04
281	23.5	4.82	3.51	566	2016-07-04
269	11.4	6.5	3.87	559	2016-07-04
306	20.1	4.55	3.83	522	2016-07-04
54	18.9	5.33	3.88	503	2016-07-04
537	19.3	4.56	3.57	458	2016-07-04
113	17.4	5.03	3.54	388	2016-07-04
403	26.9	3.25	3.72	515	2016-07-04
188	20	4.22	3.73	564	2016-07-04
146	22.7	3.93	4.04	498	2016-07-04
384	38.4	4.61	3.92	493	2016-07-04
494	26.7	4.6	3.99	485	2016-07-04
183	25.4	5.73	3.48	604	2016-07-04
86	25.3	4.4	3.54	512	2016-07-04
543	19.4	5.65	3.59	556	2016-07-04
544					2016-07-04
547	9.9	6.11	3.72	531	2016-07-04
241	28.2	4.07	3.69	477	2016-07-04
410	17.1	5.2	3.5	599	2016-07-04
342	20.3	3.83	3.08	699	2016-07-04
173	28.5	3.75	3.02	512	2016-07-04
504	12.1	4.84	4.1	486	2016-07-04
179	21.7	5.45	4.08	450	2016-07-04
389					2016-07-04
2	15.5	4.87	3.72	531	2016-07-04
66					2016-07-04
119					2016-07-04
366	26.9	4.6	3.75	519	2016-07-04
369					2016-07-04
556	20.1	4.97	3.84	478	2016-07-04
291					2016-07-04
352	28.4	4.74	3.49	520	2016-07-04
292	23	4.88	3.9	452	2016-07-04
100	26.9	4.12	4.13	565	2016-07-04
490	32.8	4.99	4.05	571	2016-07-04
42					2016-07-04
406					2016-07-04
239					2016-07-04
103	29.4	4.6	4.19	480	2016-07-04
508					2016-07-04
195					2016-07-04
219					2016-07-04
267					2016-07-04
382					2016-07-04
477					2016-07-04
377					2016-07-04
216	14.7	5.19	3.83	466	2016-07-04
344	31.1	4.75	3.72	561	2016-07-04
74	12.2	4.87	3.69	574	2016-07-04
319					2016-07-04
90	25.3	4.04	3.72	614	2016-07-04
98	20.1	4.45	3.31	429	2016-07-04
236					2016-07-04
265	21.5	4.64	3.56	441	2016-07-04
193					2016-07-04
288					2016-07-04
233	14.1	5.33	3.77	545	2016-07-04
437					2016-07-04
385					2016-07-04
443	14.6	4.91	3.55	400	2016-07-04
299					2016-07-04
454	14.7	4.65	3.3	520	2016-07-04
553	20.2	4.19	3.36	507	2016-07-04
424					2016-07-04
643	24.1	3.97	3.11	455	2016-07-04
484	20.6	5.04	3.5	480	2016-07-04
89	26	3.87	3.67	525	2016-07-04
150	19.2	5.74	4.14	559	2016-07-04
645	17.6	5.56	3.46	473	2016-07-04
38	34.4	4.18	3.53	503	2016-07-04
457	23.7	4.86	3.6	497	2016-07-04
248	22.7	4.46	3.66	512	2016-07-04
170	9.9	4.96	3.82	581	2016-07-04
640	19.1	4.68	3.57	550	2016-07-04
60	10.8	5.44	3.29	547	2016-07-04
106	18.3	4.58	3.8	433	2016-07-04
379	12.6	5.06	3.38	598	2016-07-04
12	21.9	4.91	3.61	450	2016-07-04
451	17	3.86	3.44	475	2016-07-04
517	23.7	4.92	4.03	400	2016-07-04
636	25.9	3.57	3.3	465	2016-07-04
634	17.9	4.07	3.9	571	2016-07-04
631					2016-07-04
629	17.9	5.67	3.55	532	2016-07-04
627	27.6	3.86	3.65	501	2016-07-04
624	22.8	4.36	3.51	499	2016-07-04
622	12.4	5.95	3.68	554	2016-07-04
618	19.4	5.41	3.73	540	2016-07-04
579					2016-07-04
140					2016-07-04
523					2016-07-04
211					2016-07-04
375					2016-07-04
234					2016-07-04
359					2016-07-04
121					2016-07-04
392					2016-07-04
278					2016-07-04
346					2016-07-04
135	23	5.28	4	540	2016-07-04
132	21.4	3.63	3.5	507	2016-07-04
212	25.6	5.44	3.83	486	2016-07-04
535	23.5	4.74	3.47	510	2016-07-04
257					2016-07-04
453					2016-07-04
58					2016-07-04
323					2016-07-04
602					2016-07-04
485					2016-07-04
205					2016-07-04
114					2016-07-04
540					2016-07-04
411					2016-07-04
246					2016-07-04
528	20.3	5.08	3.89	448	2016-07-04
441					2016-07-04
63					2016-07-04
546					2016-07-04
287	17.9	5.79	3.66	401	2016-07-04
492					2016-07-04
45					2016-07-04
247	15.7	5.25	3.29	395	2016-07-04
336					2016-07-04
400	27.3	4.08	3.24	411	2016-07-04
435					2016-07-04
177	14	4.17	3.56	538	2016-07-04
616	22	4.36	3.59	431	2016-07-04
1	26	4.47	3.59	439	2016-07-04
393					2016-07-04
518					2016-07-04
251	30.8	4.23	3.57	494	2016-07-04
548	26	4.9	3.87	463	2016-07-04
447	17.8	5.46	3.44	572	2016-07-04
491	25.7	4.23	3.56	462	2016-07-04
158	23.8	5.11	3.75	559	2016-07-04
427	24.1	4.7	3.65	375	2016-07-04
418	22.7	4.84	4.09	508	2016-07-04
603	27.5	4.08	3.42	421	2016-07-04
604					2016-07-04
107	21.6	4.41	3.44	491	2016-07-04
396					2016-07-04
608					2016-07-04
92	17.9	3.9	3.67	468	2016-07-04
310					2016-07-04
356					2016-07-04
169					2016-07-04
470					2016-07-04
104					2016-07-04
426					2016-07-04
425					2016-07-04
480					2016-07-04
499					2016-07-04
433	25.5	5.23	3.7	434	2016-07-04
450					2016-07-04
6					2016-07-04
423					2016-07-04
335					2016-07-04
590					2016-07-04
407					2016-07-04
354					2016-07-04
118	15.3	4.98	3.38	569	2016-07-04
311	26.6	3.82	3.86	538	2016-07-04
421					2016-07-04
314					2016-07-04
245	24.8	6.17	4.58	630	2016-07-04
614	24.6	3.99	3.14	546	2016-07-04
95					2016-07-04
204					2016-07-04
78	23.1	3.56	3.38	572	2016-07-04
428					2016-07-04
414					2016-07-04
139	16.2	5.06	3.91	433	2016-07-04
178					2016-07-04
625					2016-07-04
598	17.7	4.31	3.34	393	2016-07-04
597	11.8	3.44	4.04	351	2016-07-04
208					2016-07-04
343					2016-07-04
64					2016-07-04
117	14.6	5.09	3.35	531	2016-07-04
180	16.8	4.67	3.46	472	2016-07-04
145	16.1	3.28	3.4	414	2016-07-04
633					2016-07-04
46	12.5	4.34	3.52	546	2016-07-04
277	14.8	4.52	3.97	409	2016-07-04
21					2016-07-04
264	17.1	4.38	3.74	443	2016-07-04
596	16.7	3.78	3.01	453	2016-07-04
175					2016-07-04
650	17	4.64	3.37	451	2016-07-04
142					2016-07-04
161	18.4	4.07	3.48	535	2016-07-04
194					2016-07-04
573					2016-07-04
599					2016-07-04
565	17	4.93	3.56	452	2016-07-04
82	16.3	4.82	3.59	470	2016-07-04
4	12.2	4.93	3.41	414	2016-07-04
476					2016-07-04
430					2016-07-04
498	14.4	6.01	4.03	505	2016-07-04
76	15.8	4.9	3.84	487	2016-07-04
84	13.7	5.53	3.81	481	2016-07-04
18					2016-07-04
532					2016-07-04
124					2016-07-04
32					2016-07-04
459					2016-07-04
355					2016-07-04
413	14.8	4.92	4.15	488	2016-07-04
545					2016-07-04
474					2016-07-04
404					2016-07-04
112	17.1	4.32	2.92	497	2016-07-04
91					2016-07-04
268	18	4.58	3.52	447	2016-07-04
232	19.4	4.74	3.52	526	2016-07-04
153	19.9	3.97	3.44	471	2016-07-04
109	14.8	5.96	3.73	446	2016-07-04
40					2016-07-04
61	24.8	4.69	3.89	466	2016-07-04
68	14.2	4.05	3.47	424	2016-07-04
286					2016-07-04
394					2016-07-04
52	14.9	5.25	4.09	545	2016-07-04
617	12	4.13	3.62	565	2016-07-04
460	22.2	3.68	3.1	511	2016-07-04
307	16.8	5.18	3.34	582	2016-07-04
99	14.2	5.18	3.61	497	2016-07-04
273	16.7	3.49	3.21	454	2016-07-04
295	13.9	4.77	3.77	466	2016-07-04
541					2016-07-04
22					2016-07-04
589	12.5	5.21	3.41	529	2016-07-04
159	12.3	5.27	4.07	430	2016-07-04
14					2016-07-04
519					2016-07-04
398					2016-07-04
258					2016-07-04
87					2016-07-04
214					2016-07-04
360					2016-07-04
405					2016-07-04
338					2016-07-04
235	15.8	4.44	3.55	462	2016-07-04
254	25.6	4.53	3.3	488	2016-07-04
432					2016-07-04
201					2016-07-04
143					2016-07-04
189	17.8	5.07	3.57	453	2016-07-04
15					2016-07-04
231					2016-07-04
283					2016-07-04
69					2016-07-04
348					2016-07-04
133					2016-07-04
164	12.7	4.92	3.89	443	2016-07-04
167					2016-07-04
111					2016-07-04
71					2016-07-04
402					2016-07-04
644					2016-07-04
10					2016-07-04
472					2016-07-04
35					2016-07-04
65					2016-07-04
429					2016-07-04
171					2016-07-04
294					2016-07-04
381	17.9	3.87	3.38	477	2016-07-04
458					2016-07-04
101	17.5	5.05	3.79	407	2016-07-04
70	24.6	4.88	3.7	442	2016-07-04
79					2016-07-04
431	19.3	4.98	3.56	391	2016-07-04
347					2016-07-04
641					2016-07-04
151					2016-07-04
530	17.4	4.73	3.78	400	2016-07-04
495					2016-07-04
7					2016-07-04
574					2016-07-04
318					2016-07-04
88					2016-07-04
526					2016-07-04
298					2016-07-04
438					2016-07-04
468					2016-07-04
230					2016-07-04
564					2016-07-04
560					2016-07-04
324	26	4.06	3.45	447	2016-07-04
259					2016-07-04
13					2016-07-04
225	13	4.31	3.45	368	2016-07-04
449	17.9	3.21	3.43	401	2016-07-04
512					2016-07-04
368	14.8	4.26	3.31	407	2016-07-04
50					2016-07-04
473					2016-07-04
244					2016-07-04
329	13.4	4.32	3.61	418	2016-07-04
549					2016-07-04
373					2016-07-04
280					2016-07-04
185					2016-07-04
261	18.7	4.24	3.56	394	2016-07-04
228	27.9	4.49	3.31	435	2016-07-04
620	20.4	3.92	3.37	403	2016-07-04
562					2016-07-04
479	24.7	4.5	3.64	481	2016-07-04
149					2016-07-04
349					2016-07-04
27	28.4	4.98	4.3	479	2016-07-05
47	35.9	4.03	3.82	521	2016-07-05
125					2016-07-05
144	22.7	3.76	3.84	552	2016-07-05
253	20.8	5.13	3.74	541	2016-07-05
274	20.1	3.96	3.34	501	2016-07-05
192	29.2	4.57	4.04	514	2016-07-05
200	31.2	5.2	3.83	553	2016-07-05
361	21.4	5.7	4.28	545	2016-07-05
11	25.9	4.69	4.09	452	2016-07-05
466	22.9	4.97	3.7	523	2016-07-05
483	16.8	4.52	3.62	467	2016-07-05
632	11.5	5.78	3.7	587	2016-07-05
380	26	5.33	4.1	511	2016-07-05
8	35	3.26	3.48	539	2016-07-05
181	20.6	5.25	3.55	479	2016-07-05
24	31.2	5.28	3.7	601	2016-07-05
36	15.6	5.42	3.63	576	2016-07-05
37	26.2	4.35	3.5	510	2016-07-05
134	22.5	4.6	3.7	639	2016-07-05
209	23.7	4.95	3.54	564	2016-07-05
281	22.5	4.93	3.52	567	2016-07-05
269	11.1	6.53	3.89	562	2016-07-05
306	19.7	4.4	3.88	505	2016-07-05
54	18.6	5.37	3.89	504	2016-07-05
537	19.4	4.57	3.56	457	2016-07-05
113	16.7	5.12	3.57	385	2016-07-05
403	26.1	3.29	3.7	507	2016-07-05
188	21.5	4.44	3.74	552	2016-07-05
146	23.1	4.1	4.02	601	2016-07-05
384	38.6	4.63	3.91	489	2016-07-05
494	25.7	4.53	4.08	485	2016-07-05
183	26.1	5.48	3.51	607	2016-07-05
86	24.8	4.46	3.61	520	2016-07-05
543	19.7	5.43	3.62	571	2016-07-05
544					2016-07-05
547	10.6	6.34	3.72	529	2016-07-05
241	29.2	4.13	3.74	476	2016-07-05
410	16.2	5.3	3.55	595	2016-07-05
342	20.6	3.83	3.06	702	2016-07-05
173	27.4	3.65	3.1	513	2016-07-05
504	12.1	4.88	4.06	484	2016-07-05
179	21.6	5.24	4.03	452	2016-07-05
389					2016-07-05
2	14.8	4.86	3.73	523	2016-07-05
66					2016-07-05
119					2016-07-05
366	27.1	4.52	3.76	488	2016-07-05
369					2016-07-05
556	19.2	5.48	3.75	481	2016-07-05
291					2016-07-05
352	27	4.75	3.43	515	2016-07-05
292	22.4	5.01	3.92	452	2016-07-05
100	27.3	4.18	4.11	569	2016-07-05
490	33.1	4.82	4.03	576	2016-07-05
42					2016-07-05
406					2016-07-05
239					2016-07-05
103	29.3	4.67	4.14	480	2016-07-05
508					2016-07-05
195					2016-07-05
219					2016-07-05
267					2016-07-05
382					2016-07-05
477					2016-07-05
377					2016-07-05
216	14.3	5.27	3.88	468	2016-07-05
344	33	4.62	3.68	540	2016-07-05
74	11.8	4.94	3.7	587	2016-07-05
319					2016-07-05
90	23.9	3.93	3.77	622	2016-07-05
98	19.5	4.32	3.25	426	2016-07-05
236					2016-07-05
265	21.4	4.72	3.59	444	2016-07-05
193					2016-07-05
288					2016-07-05
233	13.6	5.01	3.76	547	2016-07-05
437					2016-07-05
385					2016-07-05
443	14.1	5.26	3.61	385	2016-07-05
299					2016-07-05
454	14.7	4.49	3.24	507	2016-07-05
553	19.7	4.15	3.37	501	2016-07-05
424					2016-07-05
643	22.6	3.92	3.14	461	2016-07-05
484	21.4	4.85	3.47	480	2016-07-05
89	22.5	3.79	3.57	520	2016-07-05
150	19.8	5.76	4.17	552	2016-07-05
645	17.3	5.4	3.45	468	2016-07-05
38	33.6	4.06	3.47	494	2016-07-05
457	27.7	5.14	3.59	518	2016-07-05
248	21.5	4.37	3.69	503	2016-07-05
170	15.6	5.11	3.79	574	2016-07-05
640	18.1	4.79	3.57	553	2016-07-05
60	10.8	5.36	3.29	543	2016-07-05
106	18.2	4.75	3.77	430	2016-07-05
379	12.7	5.07	3.43	599	2016-07-05
12	22.2	4.86	3.65	456	2016-07-05
451	17	3.94	3.4	474	2016-07-05
517	23.4	4.87	4.05	400	2016-07-05
636	25.9	3.67	3.3	460	2016-07-05
634	16.4	4.27	3.96	559	2016-07-05
631					2016-07-05
629	17.9	5.75	3.57	528	2016-07-05
627	19.7	3.83	3.65	489	2016-07-05
624	22.9	4.19	3.5	486	2016-07-05
622	12.8	5.85	3.69	574	2016-07-05
618	19.4	5.44	3.76	535	2016-07-05
579					2016-07-05
140					2016-07-05
523					2016-07-05
211					2016-07-05
375					2016-07-05
234					2016-07-05
359					2016-07-05
121					2016-07-05
392					2016-07-05
278					2016-07-05
346					2016-07-05
135	22.3	5.5	4.03	546	2016-07-05
132	22.3	3.42	3.53	535	2016-07-05
212	23.8	5.44	3.87	492	2016-07-05
535	23.6	4.68	3.49	502	2016-07-05
257					2016-07-05
453					2016-07-05
58					2016-07-05
323					2016-07-05
602					2016-07-05
485					2016-07-05
205					2016-07-05
114					2016-07-05
540					2016-07-05
411					2016-07-05
246					2016-07-05
528	21.2	5.1	3.94	451	2016-07-05
441					2016-07-05
63					2016-07-05
546					2016-07-05
287	18	5.56	3.69	386	2016-07-05
492					2016-07-05
45					2016-07-05
247	16.6	4.94	3.31	402	2016-07-05
336					2016-07-05
400	25.8	4.03	3.28	411	2016-07-05
435					2016-07-05
177	13.3	4.49	3.6	540	2016-07-05
616	15.7	4.44	3.6	406	2016-07-05
1	25.3	4.5	3.67	417	2016-07-05
393					2016-07-05
518					2016-07-05
251	30.4	4.38	3.55	494	2016-07-05
548	25.1	4.67	3.94	455	2016-07-05
447	18.3	5.09	3.46	568	2016-07-05
491	25.3	4.09	3.58	457	2016-07-05
158	24	5.05	3.76	526	2016-07-05
427	21.3	4.58	3.64	369	2016-07-05
418	24.4	4.84	4.06	506	2016-07-05
603	26.8	3.91	3.37	416	2016-07-05
604					2016-07-05
107	19.7	4.41	3.43	470	2016-07-05
396					2016-07-05
608					2016-07-05
92	18	3.77	3.66	480	2016-07-05
310					2016-07-05
356					2016-07-05
169					2016-07-05
470					2016-07-05
104					2016-07-05
426					2016-07-05
425					2016-07-05
480					2016-07-05
499					2016-07-05
433	23.6	4.9	3.74	422	2016-07-05
450					2016-07-05
6					2016-07-05
423					2016-07-05
335					2016-07-05
590					2016-07-05
407					2016-07-05
354					2016-07-05
118	15.3	4.89	3.38	564	2016-07-05
311	27.8	4.12	3.84	546	2016-07-05
421					2016-07-05
314					2016-07-05
245	26.7	5.28	4.43	625	2016-07-05
614	23.4	3.93	3.12	540	2016-07-05
95					2016-07-05
204					2016-07-05
78	22.7	3.53	3.35	572	2016-07-05
428					2016-07-05
414					2016-07-05
139	16.3	4.93	3.91	428	2016-07-05
178					2016-07-05
625					2016-07-05
598	17.3	4.07	3.32	398	2016-07-05
597	13	3.75	3.98	355	2016-07-05
208					2016-07-05
343					2016-07-05
64					2016-07-05
117	13.8	5.01	3.36	534	2016-07-05
180	16.4	4.36	3.41	475	2016-07-05
145	16.3	3.45	3.41	418	2016-07-05
633					2016-07-05
46	12.5	4.33	3.49	538	2016-07-05
277	14.6	4.77	3.94	405	2016-07-05
21					2016-07-05
264	17.6	4.32	3.7	443	2016-07-05
596	16	3.71	3.01	458	2016-07-05
175					2016-07-05
650	16.9	4.56	3.34	458	2016-07-05
142					2016-07-05
161	14.2	3.93	3.51	535	2016-07-05
194					2016-07-05
573					2016-07-05
599					2016-07-05
565	16.4	5.08	3.56	454	2016-07-05
82	16.6	4.6	3.59	475	2016-07-05
4	12.5	4.84	3.38	417	2016-07-05
476					2016-07-05
430					2016-07-05
498	14.4	5.78	4.02	503	2016-07-05
76	14.7	4.98	3.81	490	2016-07-05
84	11.7	5.28	3.77	473	2016-07-05
18					2016-07-05
532					2016-07-05
124					2016-07-05
32					2016-07-05
459					2016-07-05
355					2016-07-05
413	13.6	4.78	4.13	488	2016-07-05
545					2016-07-05
474					2016-07-05
404					2016-07-05
112	16.2	4.17	2.96	500	2016-07-05
91					2016-07-05
268	17.7	4.54	3.51	457	2016-07-05
232	19.5	4.45	3.53	555	2016-07-05
153	20.4	3.8	3.43	474	2016-07-05
109	15.2	5.59	3.71	461	2016-07-05
40					2016-07-05
61	23.8	4.72	3.88	460	2016-07-05
68	15.9	4.26	3.37	437	2016-07-05
286					2016-07-05
394					2016-07-05
52	15	5.38	4.11	547	2016-07-05
617	12.5	3.96	3.53	568	2016-07-05
460	21.1	3.68	3.16	500	2016-07-05
307	17.7	5.21	3.27	578	2016-07-05
99	13	5.1	3.62	497	2016-07-05
273	16.4	3.58	3.22	457	2016-07-05
295	12.8	4.8	3.77	467	2016-07-05
541					2016-07-05
22					2016-07-05
589	13.5	5.42	3.34	532	2016-07-05
159	12.5	5.1	4.08	386	2016-07-05
14					2016-07-05
519					2016-07-05
398					2016-07-05
258					2016-07-05
87					2016-07-05
214					2016-07-05
360					2016-07-05
405					2016-07-05
338					2016-07-05
235	15.8	4.61	3.51	546	2016-07-05
254	26.2	4.56	3.4	496	2016-07-05
432					2016-07-05
201					2016-07-05
143					2016-07-05
189	17.8	5.06	3.61	444	2016-07-05
15					2016-07-05
231					2016-07-05
283					2016-07-05
69					2016-07-05
348					2016-07-05
133					2016-07-05
164	13.1	5.01	3.89	414	2016-07-05
167					2016-07-05
111					2016-07-05
71					2016-07-05
402					2016-07-05
644					2016-07-05
10					2016-07-05
472					2016-07-05
35					2016-07-05
65					2016-07-05
429					2016-07-05
171					2016-07-05
294					2016-07-05
381	17.8	4.2	3.4	475	2016-07-05
458					2016-07-05
101	17.1	5.11	3.73	399	2016-07-05
70	25.2	4.71	3.71	445	2016-07-05
79					2016-07-05
431	18.9	5.01	3.59	392	2016-07-05
347					2016-07-05
641					2016-07-05
151					2016-07-05
530	17.4	4.81	3.8	393	2016-07-05
495					2016-07-05
7					2016-07-05
574					2016-07-05
318					2016-07-05
88					2016-07-05
526					2016-07-05
298					2016-07-05
438					2016-07-05
468					2016-07-05
230					2016-07-05
564					2016-07-05
560					2016-07-05
324	27.7	4.19	3.43	445	2016-07-05
259					2016-07-05
13					2016-07-05
225	16.3	4.23	3.47	375	2016-07-05
449	22	3.4	3.38	397	2016-07-05
512					2016-07-05
368	12.7	4.13	3.46	403	2016-07-05
50					2016-07-05
473					2016-07-05
244					2016-07-05
329	13.4	4.41	3.57	406	2016-07-05
549					2016-07-05
373					2016-07-05
280					2016-07-05
185					2016-07-05
261	18.8	4.12	3.58	425	2016-07-05
228	27.9	4.71	3.25	430	2016-07-05
620	20.3	3.94	3.42	402	2016-07-05
562					2016-07-05
479	25.4	4.46	3.64	482	2016-07-05
149					2016-07-05
349					2016-07-05
27	29.4	4.34	4.18	473	2016-07-06
47	36.5	4.43	3.74	518	2016-07-06
125					2016-07-06
144	22.5	3.71	3.81	527	2016-07-06
253	21.7	5.05	3.79	541	2016-07-06
274	19.7	3.99	3.35	522	2016-07-06
192	29.9	4.84	4.05	528	2016-07-06
200	32.3	4.78	3.88	555	2016-07-06
361	21.3	5.72	4.29	561	2016-07-06
11	27.9	4.8	4.04	455	2016-07-06
466	21.1	4.62	3.57	530	2016-07-06
483	18.1	4.45	3.56	465	2016-07-06
632	11.7	5.72	3.7	597	2016-07-06
380	26.8	5.55	4.1	509	2016-07-06
8	35.7	3.34	3.49	539	2016-07-06
181	22.2	5.24	3.39	482	2016-07-06
24	32.8	5.41	3.68	613	2016-07-06
36	15.2	5.23	3.62	580	2016-07-06
37	30.6	4.22	3.41	509	2016-07-06
134	23.1	4.32	3.62	655	2016-07-06
209	24.1	5.07	3.55	562	2016-07-06
281	22.7	4.76	3.48	563	2016-07-06
269	11	6.57	3.97	557	2016-07-06
306	18.8	3.75	3.93	509	2016-07-06
54	18.9	5.33	3.91	508	2016-07-06
537	18.6	4.37	3.61	466	2016-07-06
113	17.5	5.09	3.56	384	2016-07-06
403	26.3	3.07	3.69	503	2016-07-06
188	20.5	4.17	3.73	551	2016-07-06
146	23.9	4.32	4.02	498	2016-07-06
384	39	4.54	3.87	484	2016-07-06
494	26	4.38	3.99	494	2016-07-06
183	23.7	5.35	3.49	601	2016-07-06
86	24.8	4.22	3.62	517	2016-07-06
543	19.4	5.19	3.69	576	2016-07-06
544					2016-07-06
547	10.2	5.9	3.74	535	2016-07-06
241	28.7	4.12	3.7	484	2016-07-06
410	16.5	5.26	3.54	607	2016-07-06
342	20.2	3.67	3.12	709	2016-07-06
173	27.2	3.43	3.14	525	2016-07-06
504	12.7	4.75	4.01	489	2016-07-06
179	24	5.02	3.98	448	2016-07-06
389					2016-07-06
2	14.4	4.97	3.78	529	2016-07-06
66					2016-07-06
119					2016-07-06
366	26.4	4.43	3.76	480	2016-07-06
369					2016-07-06
556	20.3	4.82	3.75	494	2016-07-06
291					2016-07-06
352	26.7	4.58	3.39	521	2016-07-06
292	22.3	5.1	3.92	524	2016-07-06
100	26.3	4.1	4.07	563	2016-07-06
490	33.2	4.79	4.01	588	2016-07-06
42					2016-07-06
406					2016-07-06
239					2016-07-06
103	28.7	4.43	4.13	486	2016-07-06
508					2016-07-06
195					2016-07-06
219					2016-07-06
267					2016-07-06
382					2016-07-06
477					2016-07-06
377					2016-07-06
216	13.6	5.15	3.89	464	2016-07-06
344	31.1	4.55	3.71	535	2016-07-06
74	12	4.87	3.71	591	2016-07-06
319					2016-07-06
90	24.8	4.04	3.76	623	2016-07-06
98	21.3	4.39	3.21	423	2016-07-06
236					2016-07-06
265	21.7	4.56	3.61	446	2016-07-06
193					2016-07-06
288					2016-07-06
233	13.3	5.01	3.77	549	2016-07-06
437					2016-07-06
385					2016-07-06
443	14.5	5.11	3.63	397	2016-07-06
299					2016-07-06
454	15.2	4.31	3.24	535	2016-07-06
553	18.8	4.06	3.38	508	2016-07-06
424					2016-07-06
643	23	3.93	3.13	458	2016-07-06
484	21.6	4.48	3.45	485	2016-07-06
89	22.5	3.37	3.63	514	2016-07-06
150	20.2	5.72	4.2	564	2016-07-06
645	17.2	5.37	3.43	472	2016-07-06
38	32.6	4.16	3.46	516	2016-07-06
457	26	5.4	3.5	499	2016-07-06
248	22.4	4.32	3.64	510	2016-07-06
170	13.8	5.17	3.82	564	2016-07-06
640	18.7	4.91	3.6	547	2016-07-06
60	9.1	5.33	3.35	535	2016-07-06
106	18.6	4.73	3.79	431	2016-07-06
379	13.6	4.92	3.46	603	2016-07-06
12	21.5	4.45	3.64	455	2016-07-06
451	16.9	3.92	3.4	460	2016-07-06
517	23.9	4.65	3.98	396	2016-07-06
636	27	3.5	3.29	466	2016-07-06
634	17.9	4.71	4.06	563	2016-07-06
631					2016-07-06
629	17.1	5.63	3.53	533	2016-07-06
627	28.3	4.1	3.48	507	2016-07-06
624	24.3	4.11	3.49	488	2016-07-06
622	12.2	5.55	3.74	551	2016-07-06
618	19.1	5.6	3.83	530	2016-07-06
579					2016-07-06
140					2016-07-06
523					2016-07-06
211					2016-07-06
375					2016-07-06
234					2016-07-06
359					2016-07-06
121					2016-07-06
392					2016-07-06
278					2016-07-06
346					2016-07-06
135	22.6	5.7	3.99	541	2016-07-06
132	22.3	3.48	3.53	514	2016-07-06
212	24.6	5.31	3.88	486	2016-07-06
535	24	4.75	3.42	506	2016-07-06
257					2016-07-06
453					2016-07-06
58					2016-07-06
323					2016-07-06
602					2016-07-06
485					2016-07-06
205					2016-07-06
114					2016-07-06
540					2016-07-06
411					2016-07-06
246					2016-07-06
528	21	4.87	4.02	447	2016-07-06
441					2016-07-06
63					2016-07-06
546					2016-07-06
287	18.6	5.71	3.77	387	2016-07-06
492					2016-07-06
45					2016-07-06
247	16.7	4.79	3.38	493	2016-07-06
336					2016-07-06
400	26.2	3.73	3.18	410	2016-07-06
435					2016-07-06
177	13.6	4.28	3.59	543	2016-07-06
616	6.5	4.72	3.66	386	2016-07-06
1	25.6	4.63	3.62	429	2016-07-06
393					2016-07-06
518					2016-07-06
251	29.7	4.49	3.53	498	2016-07-06
548	25.9	4.55	3.95	456	2016-07-06
447	18.2	5.2	3.52	574	2016-07-06
491	25.1	3.92	3.6	447	2016-07-06
158	25.2	5.01	3.77	545	2016-07-06
427	21.9	4.61	3.53	394	2016-07-06
418	25.8	5.14	4.04	506	2016-07-06
603	27.5	3.76	3.35	415	2016-07-06
604					2016-07-06
107	19.1	4.54	3.31	479	2016-07-06
396					2016-07-06
608					2016-07-06
92	17.3	3.65	3.58	472	2016-07-06
310					2016-07-06
356					2016-07-06
169					2016-07-06
470					2016-07-06
104					2016-07-06
426					2016-07-06
425					2016-07-06
480					2016-07-06
499					2016-07-06
433	24.3	4.79	3.68	423	2016-07-06
450					2016-07-06
6					2016-07-06
423					2016-07-06
335					2016-07-06
590					2016-07-06
407					2016-07-06
354					2016-07-06
118	13	4.74	3.34	545	2016-07-06
311	27.3	4.06	3.85	544	2016-07-06
421					2016-07-06
314					2016-07-06
245	27.7	4.94	4.23	628	2016-07-06
614	23.7	3.86	3.09	544	2016-07-06
95					2016-07-06
204					2016-07-06
78	24.3	3.49	3.26	572	2016-07-06
428					2016-07-06
414					2016-07-06
139	15.5	4.92	3.95	431	2016-07-06
178					2016-07-06
625					2016-07-06
598	17.3	4.13	3.31	403	2016-07-06
597	12.8	3.88	3.97	346	2016-07-06
208					2016-07-06
343					2016-07-06
64					2016-07-06
117	14.9	4.66	3.29	536	2016-07-06
180	16.8	4.79	3.45	473	2016-07-06
145	16.3	3.32	3.44	418	2016-07-06
633					2016-07-06
46	12.7	4.41	3.56	544	2016-07-06
277	14.7	5.3	3.98	396	2016-07-06
21					2016-07-06
264	17.6	4.35	3.67	445	2016-07-06
596	17.2	3.71	3	458	2016-07-06
175					2016-07-06
650	16.6	4.53	3.35	450	2016-07-06
142					2016-07-06
161	15.9	4.07	3.42	543	2016-07-06
194					2016-07-06
573					2016-07-06
599					2016-07-06
565	16.6	5.14	3.56	460	2016-07-06
82	16.3	4.45	3.6	473	2016-07-06
4	12.5	5	3.41	422	2016-07-06
476					2016-07-06
430					2016-07-06
498	14.8	5.7	4.01	508	2016-07-06
76	15.6	4.86	3.82	479	2016-07-06
84	12.4	5.39	3.72	485	2016-07-06
18					2016-07-06
532					2016-07-06
124					2016-07-06
32					2016-07-06
459					2016-07-06
355					2016-07-06
413	13.9	5.12	4.09	496	2016-07-06
545					2016-07-06
474					2016-07-06
404					2016-07-06
112	16.4	4.15	2.98	503	2016-07-06
91					2016-07-06
268	17.9	4.39	3.47	460	2016-07-06
232	19.5	4.61	3.55	539	2016-07-06
153	20.1	3.96	3.42	473	2016-07-06
109	15.1	5.66	3.71	456	2016-07-06
40					2016-07-06
61	24	4.59	3.89	464	2016-07-06
68	10.7	4.2	3.35	433	2016-07-06
286					2016-07-06
394					2016-07-06
52	15	5.29	4.12	546	2016-07-06
617	12.5	3.67	3.6	558	2016-07-06
460	20.8	3.6	3.19	506	2016-07-06
307	19.5	5.03	3.2	554	2016-07-06
99	13.7	5.03	3.63	496	2016-07-06
273	16.7	3.64	3.19	453	2016-07-06
295	10.7	4.97	3.72	462	2016-07-06
541					2016-07-06
22					2016-07-06
589	13.7	5.23	3.37	535	2016-07-06
159	13.1	5.05	4.07	413	2016-07-06
14					2016-07-06
519					2016-07-06
398					2016-07-06
258					2016-07-06
87					2016-07-06
214					2016-07-06
360					2016-07-06
405					2016-07-06
338					2016-07-06
235	15.1	4.63	3.54	459	2016-07-06
254	26.9	4.7	3.44	504	2016-07-06
432					2016-07-06
201					2016-07-06
143					2016-07-06
189	17.7	4.76	3.62	448	2016-07-06
15					2016-07-06
231					2016-07-06
283					2016-07-06
69					2016-07-06
348					2016-07-06
133					2016-07-06
164	13.8	5.28	3.85	434	2016-07-06
167					2016-07-06
111					2016-07-06
71					2016-07-06
402					2016-07-06
644					2016-07-06
10					2016-07-06
472					2016-07-06
35					2016-07-06
65					2016-07-06
429					2016-07-06
171					2016-07-06
294					2016-07-06
381	17.9	4.3	3.43	481	2016-07-06
458					2016-07-06
101	17.1	5.02	3.71	403	2016-07-06
70	25.4	4.79	3.72	455	2016-07-06
79					2016-07-06
431	18.1	5.04	3.53	387	2016-07-06
347					2016-07-06
641					2016-07-06
151					2016-07-06
530	18.1	4.86	3.82	400	2016-07-06
495					2016-07-06
7					2016-07-06
574					2016-07-06
318					2016-07-06
88					2016-07-06
526					2016-07-06
298					2016-07-06
438					2016-07-06
468					2016-07-06
230					2016-07-06
564					2016-07-06
560					2016-07-06
324	27.4	4.11	3.4	444	2016-07-06
259					2016-07-06
13					2016-07-06
225	16	3.9	3.54	371	2016-07-06
449	20.5	3.42	3.4	391	2016-07-06
512					2016-07-06
368	13.9	4.27	3.46	411	2016-07-06
50					2016-07-06
473					2016-07-06
244					2016-07-06
329	11.6	3.66	3.78	422	2016-07-06
549					2016-07-06
373					2016-07-06
280					2016-07-06
185					2016-07-06
261	18.7	4.07	3.58	404	2016-07-06
228	11.4	4.66	3.28	414	2016-07-06
620	16.4	4.02	3.44	408	2016-07-06
562					2016-07-06
479	25	4.43	3.61	478	2016-07-06
149					2016-07-06
349					2016-07-06
27	25.7	4.59	4.13	476	2016-07-07
[truncated: 8,351 more rows]

## Sheet: August 2016
Animal Number	Day Production	Fat indication	Protein indication	Weight	Date
27	31.3	4.7	3.85	484	2016-08-01	2016-08-01
47	33.3	4.62	3.82	509	2016-08-01
125					2016-08-01
144	22.7	4.55	4.03	578	2016-08-01
253	19.9	5.51	3.93	528	2016-08-01
274	20.3	4.02	3.51	526	2016-08-01
192	28	5.49	4.1	512	2016-08-01
200	29	5.28	3.97	541	2016-08-01
361	20.1	6.38	4.36	561	2016-08-01
11	25.6	5.01	4.22	460	2016-08-01
466	23.2	4.98	4.04	537	2016-08-01
483	16.1	4.77	3.76	468	2016-08-01
632					2016-08-01
380	26.2	5.81	4.29	517	2016-08-01
8	32.7	4.09	3.74	544	2016-08-01
181	20.6	5.42	3.66	485	2016-08-01
24	29.7	5.72	3.85	603	2016-08-01
36					2016-08-01
37	27.1	3.57	3.77	528	2016-08-01
134	22.2	4.31	3.79	632	2016-08-01
209	24.2	5.38	3.86	570	2016-08-01
281	20.3	4.89	3.53	566	2016-08-01
269					2016-08-01
306	18.5	4.48	3.85	502	2016-08-01
54	17.2	5.85	4.02	512	2016-08-01
537	18.6	4.88	3.89	470	2016-08-01
113	15.1	5.53	3.68	388	2016-08-01
403	24.5	3.79	3.96	509	2016-08-01
188	19.5	4.6	3.97	554	2016-08-01
146	22.2	4.92	4	488	2016-08-01
384	38	4.94	3.93	493	2016-08-01
494	22.3	5.44	4.3	504	2016-08-01
183	23.2	5.74	3.61	617	2016-08-01
86	25	5.45	3.89	515	2016-08-01
543	16.8	5.67	3.91	584	2016-08-01
544	29.6	5.01	4.12	539	2016-08-01
547					2016-08-01
241	25.4	4.43	3.72	477	2016-08-01
410					2016-08-01
342	20.8	3.8	3.34	714	2016-08-01
173	26.9	3.87	3.45	523	2016-08-01
504	12.4	5.68	4.41	506	2016-08-01
179	23.4	4.65	4.09	470	2016-08-01
389					2016-08-01
2	10.1	4.35	3.72	547	2016-08-01
66	20.6	5.87	5.34	505	2016-08-01
119	27.6	5.25	4.32	422	2016-08-01
366	26.5	4.13	3.73	488	2016-08-01
369					2016-08-01
556	19.6	5.42	3.98	505	2016-08-01
291	15.8	8.91	5.37	486	2016-08-01
352	24	5.29	3.64	524	2016-08-01
292	20.8	5.54	3.99	462	2016-08-01
100	30.4	4.27	3.65	565	2016-08-01
490	35.8	5.07	3.75	598	2016-08-01
42					2016-08-01
406					2016-08-01
239					2016-08-01
103	31.9	4.55	3.66	460	2016-08-01
508					2016-08-01
195					2016-08-01
219					2016-08-01
267					2016-08-01
382					2016-08-01
477					2016-08-01
377					2016-08-01
216					2016-08-01
344	30.5	5.1	3.7	560	2016-08-01
74	11.5	4.79	3.95	582	2016-08-01
319					2016-08-01
90	23.5	3.91	3.77	617	2016-08-01
98	19.9	4.83	3.57	433	2016-08-01
236					2016-08-01
265	22.4	4.61	3.79	451	2016-08-01
193	25.7	4.81	3.83	443	2016-08-01
288					2016-08-01
233	11.9	5.57	4.01	567	2016-08-01
437					2016-08-01
385					2016-08-01
443	13.3	4.73	3.73	396	2016-08-01
299					2016-08-01
454	11.6	5.06	3.68	543	2016-08-01
553	18.5	4.44	3.57	512	2016-08-01
424					2016-08-01
643	20.1	4.24	3.23	470	2016-08-01
484	20.4	5.48	3.79	486	2016-08-01
89	17.8	3.93	3.95	512	2016-08-01
150	17	6.19	4.38	569	2016-08-01
645	14.5	4.67	3.3	493	2016-08-01
38	31.2	4	3.67	497	2016-08-01
457	24.1	5.53	3.72	502	2016-08-01
248	20.5	4.83	3.81	508	2016-08-01
170	12.4	5.27	4.04	575	2016-08-01
640	18.9	5.18	3.8	573	2016-08-01
60					2016-08-01
106	17.7	4.83	3.9	431	2016-08-01
379	13.8	5.28	3.65	601	2016-08-01
12	22.1	5.37	3.77	450	2016-08-01
451	16.3	4.08	3.57	465	2016-08-01
517	22.7	4.79	3.92	406	2016-08-01
636	25.2	3.46	3.53	476	2016-08-01
634	16.7	5.36	4.16	577	2016-08-01
631					2016-08-01
629	15.1	5.84	3.71	544	2016-08-01
627	26.7	3.7	3.74	507	2016-08-01
624	24.3	4.92	3.95	514	2016-08-01
622	11	6.59	4.15	563	2016-08-01
618	18.4	5.73	4.03	563	2016-08-01
579					2016-08-01
140					2016-08-01
523					2016-08-01
211					2016-08-01
375					2016-08-01
234					2016-08-01
359					2016-08-01
121					2016-08-01
392					2016-08-01
278					2016-08-01
346					2016-08-01
135	20.9	5.06	3.93	539	2016-08-01
132	20.2	3.86	3.8	551	2016-08-01
212	24	6.11	4.08	505	2016-08-01
535	21.8	5.27	3.6	523	2016-08-01
257					2016-08-01
453					2016-08-01
58					2016-08-01
323					2016-08-01
602					2016-08-01
485					2016-08-01
205					2016-08-01
114					2016-08-01
540					2016-08-01
411					2016-08-01
246					2016-08-01
528	18	6.15	4.06	459	2016-08-01
441					2016-08-01
63					2016-08-01
546					2016-08-01
287	18.5	5.82	4.03	406	2016-08-01
492					2016-08-01
45					2016-08-01
247	17.8	4.22	3.9	475	2016-08-01
336					2016-08-01
400	22.5	4.14	3.62	409	2016-08-01
435					2016-08-01
177					2016-08-01
616	18.6	5.16	3.9	409	2016-08-01
1	23.1	4.78	3.83	434	2016-08-01
393					2016-08-01
518					2016-08-01
251	27.9	4.75	3.75	506	2016-08-01
548	23.8	5	4.08	470	2016-08-01
447	15.8	5.61	3.69	582	2016-08-01
491	23.4	3.99	3.65	460	2016-08-01
158	23	5.83	3.81	566	2016-08-01
427	24.2	5	3.8	385	2016-08-01
418	25.8	5.08	3.91	514	2016-08-01
603	24.3	4.58	3.78	433	2016-08-01
604	22.2	4.13	3.8	400	2016-08-01
107	18.6	4.38	3.45	468	2016-08-01
396					2016-08-01
608					2016-08-01
92	18.2	3.7	3.69	470	2016-08-01
310					2016-08-01
356	24.2	5.07	4.3	477	2016-08-01
169					2016-08-01
470					2016-08-01
104					2016-08-01
426					2016-08-01
425					2016-08-01
480					2016-08-01
499					2016-08-01
433	22.5	4.85	3.91	494	2016-08-01
450					2016-08-01
6					2016-08-01
423					2016-08-01
335					2016-08-01
590					2016-08-01
407					2016-08-01
354					2016-08-01
118	11.6	3.86	3.17	565	2016-08-01
311	21.4	4.82	3.71	536	2016-08-01
421					2016-08-01
314					2016-08-01
245	36.9	4.02	3.43	620	2016-08-01
614	22.9	4.15	3.35	545	2016-08-01
95					2016-08-01
204	28.8	4.66	4.07	532	2016-08-01
78	21.5	3.99	3.47	589	2016-08-01
428					2016-08-01
414					2016-08-01
139	16.6	5.38	4	425	2016-08-01
178					2016-08-01
625					2016-08-01
598	18	4.56	3.57	416	2016-08-01
597	14.9	5.32	3.99	346	2016-08-01
208					2016-08-01
343					2016-08-01
64					2016-08-01
117					2016-08-01
180	15.7	4.85	3.68	474	2016-08-01
145	15.8	3.93	3.91	471	2016-08-01
633	27	4.56	4.07	503	2016-08-01
46	11	4.68	3.72	552	2016-08-01
277	15.1	5.37	4.1	410	2016-08-01
21					2016-08-01
264	17.1	4.4	3.83	462	2016-08-01
596	16.2	4.07	3.21	487	2016-08-01
175					2016-08-01
650	16.9	4.86	3.67	461	2016-08-01
142					2016-08-01
161	15.7	4.64	3.76	553	2016-08-01
194					2016-08-01
573					2016-08-01
599					2016-08-01
565	16.3	5.27	3.91	467	2016-08-01
82	15.6	5.02	3.77	477	2016-08-01
4	12.4	5.33	3.67	432	2016-08-01
476					2016-08-01
430					2016-08-01
498					2016-08-01
76	14.7	5.19	4.1	491	2016-08-01
84	11.5	6.24	3.89	485	2016-08-01
18					2016-08-01
532					2016-08-01
124					2016-08-01
32					2016-08-01
459					2016-08-01
355					2016-08-01
413	11.8	6.53	4.53	499	2016-08-01
545					2016-08-01
474					2016-08-01
404					2016-08-01
112	15.7	4.42	3.21	540	2016-08-01
91					2016-08-01
268	17.8	4.4	3.54	475	2016-08-01
232	19.3	4.95	3.67	540	2016-08-01
153	18.7	4.46	3.77	499	2016-08-01
109	15.2	5.21	3.7	471	2016-08-01
40					2016-08-01
61	19.9	4.97	3.95	480	2016-08-01
68	15.2	4.73	3.76	425	2016-08-01
286					2016-08-01
394					2016-08-01
52	14	6.15	4.47	556	2016-08-01
617	10.6	4.52	4.02	568	2016-08-01
460	21.2	4.14	3.37	513	2016-08-01
307	15.8	5.13	3.42	593	2016-08-01
99	13.5	5.36	3.91	509	2016-08-01
273	16	4.11	3.55	475	2016-08-01
295	12.7	4.84	4.01	485	2016-08-01
541					2016-08-01
22					2016-08-01
589	11.8	5.49	3.76	538	2016-08-01
159	14.7	5.44	4.25	403	2016-08-01
14					2016-08-01
519					2016-08-01
398					2016-08-01
258					2016-08-01
87					2016-08-01
214					2016-08-01
360					2016-08-01
405					2016-08-01
338					2016-08-01
235	16.7	4.93	3.65	482	2016-08-01
254	24.6	4.73	3.51	495	2016-08-01
432					2016-08-01
201					2016-08-01
143					2016-08-01
189	18	4.88	3.71	482	2016-08-01
15					2016-08-01
231					2016-08-01
283					2016-08-01
69					2016-08-01
348					2016-08-01
133					2016-08-01
164	15.3	5.61	4.08	431	2016-08-01
167					2016-08-01
111					2016-08-01
71					2016-08-01
402					2016-08-01
644					2016-08-01
10					2016-08-01
472					2016-08-01
35					2016-08-01
65					2016-08-01
429					2016-08-01
171					2016-08-01
294					2016-08-01
381	15.6	3.67	3.3	497	2016-08-01
458					2016-08-01
101	20.1	5.15	3.95	413	2016-08-01
70	24.3	4.01	3.65	460	2016-08-01
79					2016-08-01
431	16.3	4.18	3.39	434	2016-08-01
347					2016-08-01
641					2016-08-01
151					2016-08-01
530	18.3	5.51	4	399	2016-08-01
495					2016-08-01
7					2016-08-01
574					2016-08-01
318					2016-08-01
88					2016-08-01
526					2016-08-01
298					2016-08-01
438					2016-08-01
468					2016-08-01
230					2016-08-01
564					2016-08-01
560					2016-08-01
324	25.2	4.28	3.51	439	2016-08-01
259					2016-08-01
13					2016-08-01
225	16.1	4.34	3.73	363	2016-08-01
449	23.2	3.77	3.59	399	2016-08-01
512					2016-08-01
368	15.1	4.25	3.5	427	2016-08-01
50					2016-08-01
473					2016-08-01
244					2016-08-01
329	14.9	4.65	3.96	444	2016-08-01
549					2016-08-01
373					2016-08-01
280					2016-08-01
185					2016-08-01
261	18.5	3.91	3.62	426	2016-08-01
228	26	4.34	3.37	425	2016-08-01
620	20.7	4.82	3.43	418	2016-08-01
562					2016-08-01
479	25.7	4.06	3.58	504	2016-08-01
149					2016-08-01
349					2016-08-01
607	16.4	5.28	3.99	446	2016-08-01
529					2016-08-01
27	31.9	4.86	3.8	487	2016-08-02
47	36.5	4.34	3.72	522	2016-08-02
125					2016-08-02
144	23.2	4.68	3.94	534	2016-08-02
253	21	5.31	3.91	514	2016-08-02
274	19.5	4.26	3.55	528	2016-08-02
192	28.2	5.49	4.1	509	2016-08-02
200	27.8	5	3.97	555	2016-08-02
361	19.7	6.47	4.33	555	2016-08-02
11	25.5	5.03	4.16	461	2016-08-02
466	23.3	5.56	3.99	532	2016-08-02
483	14.6	4.84	3.8	470	2016-08-02
632					2016-08-02
380	25.3	5.58	4.2	521	2016-08-02
8	32.3	4.11	3.69	539	2016-08-02
181	20.8	5.95	3.62	475	2016-08-02
24	29.9	5.8	3.88	637	2016-08-02
36					2016-08-02
37	24	3.54	3.76	530	2016-08-02
134	21.6	4.46	3.76	660	2016-08-02
209	23.4	5.23	3.81	564	2016-08-02
281	20.7	5.1	3.52	569	2016-08-02
269					2016-08-02
306	19	4.38	3.88	511	2016-08-02
54	17.3	5.71	4.09	512	2016-08-02
537	18.4	5.16	3.88	464	2016-08-02
113	13.7	5.78	3.71	394	2016-08-02
403	25.5	3.8	3.93	514	2016-08-02
188	19	4.81	3.92	561	2016-08-02
146	22.9	5.31	3.9	499	2016-08-02
384	40.1	4.62	3.82	502	2016-08-02
494	23.2	5.34	4.24	496	2016-08-02
183	22.4	5.6	3.52	634	2016-08-02
86	23.2	5.46	3.86	518	2016-08-02
543	16.7	5.74	3.97	587	2016-08-02
544	30.3	4.96	4.03	508	2016-08-02
547					2016-08-02
241	26.4	4.32	3.7	474	2016-08-02
410					2016-08-02
342	19.2	4.14	3.36	722	2016-08-02
173	19.8	3.37	3.42	525	2016-08-02
504	11.5	6.3	4.53	507	2016-08-02
179	22.2	5.47	4.04	471	2016-08-02
389					2016-08-02
2	12.9	4.81	3.82	537	2016-08-02
66	22.9	5.64	5.11	504	2016-08-02
119	28.8	5.13	4.22	433	2016-08-02
366	25.1	4.37	3.73	474	2016-08-02
369					2016-08-02
556	19.8	5.39	3.97	521	2016-08-02
291	19.9	9.12	5.22	488	2016-08-02
352	24.2	4.67	3.55	546	2016-08-02
292	21.8	5.35	3.94	459	2016-08-02
100	30.9	4.31	3.62	567	2016-08-02
490	36.6	5	3.71	596	2016-08-02
42					2016-08-02
406					2016-08-02
239					2016-08-02
103	31.6	4.65	3.65	476	2016-08-02
508	6.9	5.47	5.78		2016-08-02
195					2016-08-02
219					2016-08-02
267					2016-08-02
382					2016-08-02
477					2016-08-02
377					2016-08-02
216					2016-08-02
344	30	4.71	3.71	543	2016-08-02
74	11.3	4.95	3.95	598	2016-08-02
319					2016-08-02
90	21.7	4.08	3.78	618	2016-08-02
98	19.1	5.19	3.59	446	2016-08-02
236					2016-08-02
265	17.3	4.62	3.8	452	2016-08-02
193	24.3	4.79	3.79	439	2016-08-02
288					2016-08-02
233	11.4	5.86	4.04	565	2016-08-02
437					2016-08-02
385					2016-08-02
443	12.9	4.92	3.76	398	2016-08-02
299					2016-08-02
454	11	5	3.72	546	2016-08-02
553	17.3	4.7	3.61	504	2016-08-02
424					2016-08-02
643	19.8	4.24	3.21	469	2016-08-02
484	14.9	5.43	3.73	487	2016-08-02
89	19.1	4.42	3.96	517	2016-08-02
150	17	6.22	4.36	565	2016-08-02
645	13.6	4.88	3.35	480	2016-08-02
38	31	4.2	3.63	504	2016-08-02
457	24.6	5.42	3.68	502	2016-08-02
248	18.6	5.06	3.79	530	2016-08-02
170	12.5	5.52	4.11	568	2016-08-02
640	17.6	5.23	3.83	571	2016-08-02
60					2016-08-02
106	16.2	5.18	3.95	429	2016-08-02
379	12.2	5.46	3.74	619	2016-08-02
12	21.9	5.19	3.83	459	2016-08-02
451	16.6	3.96	3.54	477	2016-08-02
517	23.1	4.97	3.91	389	2016-08-02
636	24.7	3.81	3.59	471	2016-08-02
634	15.9	5.84	4.23	572	2016-08-02
631					2016-08-02
629	15.3	5.79	3.66	537	2016-08-02
627	26.5	3.93	3.74	504	2016-08-02
624	23.8	4.98	3.93	504	2016-08-02
622	10.7	6.4	4.17	569	2016-08-02
618	18	5.96	4.03	554	2016-08-02
579					2016-08-02
140					2016-08-02
523					2016-08-02
211					2016-08-02
375					2016-08-02
234					2016-08-02
359					2016-08-02
121					2016-08-02
392					2016-08-02
278					2016-08-02
346					2016-08-02
135	18.6	5.21	3.95	545	2016-08-02
132	19.8	4.06	3.79	532	2016-08-02
212	22.2	5.71	4.09	541	2016-08-02
535	23.5	5.18	3.52	525	2016-08-02
257					2016-08-02
453					2016-08-02
58					2016-08-02
323					2016-08-02
602					2016-08-02
485					2016-08-02
205					2016-08-02
114					2016-08-02
540					2016-08-02
411					2016-08-02
246					2016-08-02
528	16.1	5.99	4.06	461	2016-08-02
441					2016-08-02
63					2016-08-02
546					2016-08-02
287	20.5	6.11	4.04	414	2016-08-02
492					2016-08-02
45					2016-08-02
247	18	4.38	3.9	437	2016-08-02
336					2016-08-02
400	20.7	4.06	3.65	403	2016-08-02
435					2016-08-02
177					2016-08-02
616	18.8	5.36	3.84	428	2016-08-02
1	22.7	5.22	3.76	435	2016-08-02
393					2016-08-02
518					2016-08-02
251	27.1	4.67	3.78	501	2016-08-02
548	23.6	5.09	4.06	453	2016-08-02
447	16.1	5.67	3.67	584	2016-08-02
491	23.6	4.12	3.67	472	2016-08-02
158	21.4	5.63	3.79	543	2016-08-02
427	23.5	5.21	3.76	389	2016-08-02
418	25.3	5.06	3.95	509	2016-08-02
603	21.3	4.62	3.8	423	2016-08-02
604	22.4	3.91	3.82	411	2016-08-02
107	19	4.56	3.48	485	2016-08-02
396					2016-08-02
608					2016-08-02
92	16.8	3.33	3.75	467	2016-08-02
310					2016-08-02
356	25.5	4.75	4.13	486	2016-08-02
169					2016-08-02
470					2016-08-02
104					2016-08-02
426					2016-08-02
425					2016-08-02
480					2016-08-02
499					2016-08-02
433	23	5.35	3.98	443	2016-08-02
450					2016-08-02
6					2016-08-02
423					2016-08-02
335					2016-08-02
590					2016-08-02
407					2016-08-02
354					2016-08-02
118	11.7	4.28	3.26	557	2016-08-02
311	20.4	5.09	3.81	535	2016-08-02
421					2016-08-02
314					2016-08-02
245	37.3	3.84	3.41	633	2016-08-02
614	23.5	4.09	3.25	549	2016-08-02
95					2016-08-02
204	27.2	4.66	4.02	532	2016-08-02
78	23	3.98	3.44	592	2016-08-02
428					2016-08-02
414	8.1	5.29	5.09		2016-08-02
139	15.4	5.35	4.06	416	2016-08-02
178					2016-08-02
625	14.3	3.46	4.52		2016-08-02
598	17.5	4.54	3.58	414	2016-08-02
597	16.5	5.35	4.01	353	2016-08-02
208					2016-08-02
343					2016-08-02
64					2016-08-02
117					2016-08-02
180	15.7	4.91	3.68	475	2016-08-02
145	15.9	4.24	3.94	423	2016-08-02
633	27.9	4.58	3.97	507	2016-08-02
46	11.2	4.86	3.76	553	2016-08-02
277	11.7	5.33	4.17	388	2016-08-02
21					2016-08-02
264	16.8	4.54	3.81	477	2016-08-02
596	16.1	4.19	3.23	462	2016-08-02
175					2016-08-02
650	16.1	5.06	3.7	465	2016-08-02
142					2016-08-02
161	15.6	4.74	3.71	638	2016-08-02
194					2016-08-02
573					2016-08-02
599					2016-08-02
565	15.7	5.41	3.9	462	2016-08-02
82	14.6	5.21	3.76	490	2016-08-02
4	10.9	5.32	3.69	431	2016-08-02
476					2016-08-02
430					2016-08-02
498					2016-08-02
76	15.1	5.41	4.11	480	2016-08-02
84	9.5	6.38	3.91	499	2016-08-02
18					2016-08-02
532					2016-08-02
124					2016-08-02
32					2016-08-02
459					2016-08-02
355					2016-08-02
413	12.1	6.81	4.5	511	2016-08-02
545					2016-08-02
474					2016-08-02
404					2016-08-02
112	15.9	4.59	3.21	522	2016-08-02
91					2016-08-02
268	17.7	4.7	3.6	466	2016-08-02
232	19.5	5.26	3.71	552	2016-08-02
153	17.9	4.64	3.78	494	2016-08-02
109	15.2	5.28	3.73	469	2016-08-02
40					2016-08-02
61	21.4	5.1	3.97	481	2016-08-02
68	14.1	4.94	3.79	427	2016-08-02
286					2016-08-02
394					2016-08-02
52	14	6.21	4.44	573	2016-08-02
617	9.8	4.71	4.07	569	2016-08-02
460	20	4.05	3.4	508	2016-08-02
307	15.7	5.21	3.42	584	2016-08-02
99	13.4	5.67	3.96	499	2016-08-02
273	15	4.45	3.67	474	2016-08-02
295	12.3	5.09	4.05	526	2016-08-02
541					2016-08-02
22					2016-08-02
589	11.3	5.85	3.81	536	2016-08-02
159	14.7	5.65	4.25	406	2016-08-02
14					2016-08-02
519					2016-08-02
398					2016-08-02
258					2016-08-02
87					2016-08-02
214					2016-08-02
360					2016-08-02
405					2016-08-02
338					2016-08-02
235	16.2	5.03	3.74	481	2016-08-02
254	25.2	4.64	3.51	541	2016-08-02
432					2016-08-02
201					2016-08-02
143					2016-08-02
189	17.9	4.81	3.69	466	2016-08-02
15					2016-08-02
231					2016-08-02
283					2016-08-02
69					2016-08-02
348					2016-08-02
133					2016-08-02
164	15.3	5.74	4.05	441	2016-08-02
167					2016-08-02
111					2016-08-02
71					2016-08-02
402					2016-08-02
644					2016-08-02
10					2016-08-02
472					2016-08-02
35					2016-08-02
65					2016-08-02
429					2016-08-02
171					2016-08-02
294					2016-08-02
381	16	3.89	3.32	501	2016-08-02
458					2016-08-02
101	18.4	5.05	3.98	411	2016-08-02
70	24	4.12	3.66	459	2016-08-02
79					2016-08-02
431	15.9	4.43	3.44	397	2016-08-02
347					2016-08-02
641					2016-08-02
151					2016-08-02
530	17.6	5.51	4.01	398	2016-08-02
495					2016-08-02
7					2016-08-02
574					2016-08-02
318					2016-08-02
88					2016-08-02
526					2016-08-02
298					2016-08-02
438					2016-08-02
468					2016-08-02
230					2016-08-02
564					2016-08-02
560					2016-08-02
324	25.6	4.3	3.57	447	2016-08-02
259					2016-08-02
13					2016-08-02
225	17.1	4.51	3.79	379	2016-08-02
449	22.6	3.74	3.58	461	2016-08-02
512					2016-08-02
368	14.4	4.44	3.51	428	2016-08-02
50					2016-08-02
473					2016-08-02
244					2016-08-02
329	14.7	4.79	4.04	447	2016-08-02
549					2016-08-02
373					2016-08-02
280					2016-08-02
185					2016-08-02
261	18.7	4.1	3.61	426	2016-08-02
228	26.9	4.37	3.35	423	2016-08-02
620	21.9	5.15	3.6	417	2016-08-02
562					2016-08-02
479	25.8	4.08	3.51	506	2016-08-02
149					2016-08-02
349					2016-08-02
607	18.6	5.23	3.93	450	2016-08-02
529	5.9	6.86	5.25		2016-08-02
27	32.2	4.82	3.87	477	2016-08-03
47	36.4	4.29	3.72	513	2016-08-03
125					2016-08-03
144	22.3	4.64	3.91	587	2016-08-03
253	20.3	5.64	3.81	503	2016-08-03
274	19.4	3.91	3.48	536	2016-08-03
192	27.9	5.54	4.13	524	2016-08-03
200	27.1	5.08	4	588	2016-08-03
361	20.4	6.7	4.36	557	2016-08-03
11	25.2	5.09	4.17	467	2016-08-03
466	22.7	5.95	3.99	546	2016-08-03
483	14.9	5.08	3.84	478	2016-08-03
632					2016-08-03
380	23.8	6.26	4.32	510	2016-08-03
8	33.4	4.34	3.71	554	2016-08-03
181	21.2	5.79	3.63	494	2016-08-03
24	29.7	5.71	3.82	637	2016-08-03
36					2016-08-03
37	23	3.84	3.8	515	2016-08-03
134	21.3	4.5	3.73	685	2016-08-03
209	26.1	5.27	3.77	574	2016-08-03
281	20.8	5.26	3.55	574	2016-08-03
269					2016-08-03
306	18.2	4.25	3.91	511	2016-08-03
54	15.9	5.78	4.16	519	2016-08-03
537	18.4	5.18	3.85	465	2016-08-03
113	14.3	5.93	3.68	390	2016-08-03
403	27.6	3.83	4	509	2016-08-03
188	19.4	5.28	3.95	560	2016-08-03
146	22.8	4.54	3.86	505	2016-08-03
384	39.6	4.21	3.82	503	2016-08-03
494	23.3	5.63	4.24	499	2016-08-03
183	24.3	5.91	3.5	638	2016-08-03
86	24.4	5.31	3.86	504	2016-08-03
543	16.3	5.87	3.96	592	2016-08-03
544	30.3	4.97	4.04	510	2016-08-03
547					2016-08-03
241	26.5	4.77	3.69	472	2016-08-03
410					2016-08-03
342	19.7	4.09	3.37	753	2016-08-03
173	23.7	3.42	3.47	533	2016-08-03
504	11.6	6.3	4.51	517	2016-08-03
179	22.1	5.74	3.99	446	2016-08-03
389					2016-08-03
2	8.4	4.54	3.77	550	2016-08-03
66	25	4.94	4.96	501	2016-08-03
119	28.3	5.12	4.2	433	2016-08-03
366	25.1	4.26	3.71	485	2016-08-03
369					2016-08-03
556	20.6	5.41	3.98	505	2016-08-03
291	22.5	7.61	5	496	2016-08-03
352	25.1	4.8	3.51	529	2016-08-03
292	22.1	5.6	3.96	467	2016-08-03
100	30.4	4.12	3.61	569	2016-08-03
490	37.3	5.01	3.74	596	2016-08-03
42					2016-08-03
406					2016-08-03
239					2016-08-03
103	33.8	4.68	3.64	466	2016-08-03
508	19.9	5.9	5.49	479	2016-08-03
195					2016-08-03
219					2016-08-03
267					2016-08-03
382					2016-08-03
477					2016-08-03
377					2016-08-03
216					2016-08-03
344	27.9	4.39	3.78	531	2016-08-03
74	10.9	5.05	3.96	593	2016-08-03
319					2016-08-03
90	22.8	4.26	3.75	591	2016-08-03
98	20	5.38	3.61	443	2016-08-03
236					2016-08-03
265	21.1	4.68	3.8	463	2016-08-03
193	25.7	4.56	3.81	442	2016-08-03
288					2016-08-03
233	11.9	5.86	4.01	564	2016-08-03
437					2016-08-03
385					2016-08-03
443	12	5.35	3.82	387	2016-08-03
299					2016-08-03
454	11.4	5.17	3.72	547	2016-08-03
553	17.2	4.84	3.62	512	2016-08-03
424					2016-08-03
643	16	3.36	3.15	475	2016-08-03
484	23.6	5.42	3.73	492	2016-08-03
89	20.9	4.69	3.87	528	2016-08-03
150	17.7	6.28	4.36	573	2016-08-03
645	13.7	4.91	3.31	496	2016-08-03
38	30.3	4.43	3.65	503	2016-08-03
457	24.5	5.19	3.64	491	2016-08-03
248	20.6	4.94	3.73	508	2016-08-03
170	10.9	5.57	4.11	585	2016-08-03
640	17.8	5.11	3.85	585	2016-08-03
60					2016-08-03
106	16.5	4.89	3.94	440	2016-08-03
379	12.7	5.66	3.7	622	2016-08-03
12	22.3	5.21	3.85	460	2016-08-03
451	16.3	4.13	3.5	472	2016-08-03
517	22.4	5.44	3.92	409	2016-08-03
636	24.7	3.69	3.51	480	2016-08-03
634	14.5	5.97	4.22	581	2016-08-03
631					2016-08-03
629	15.1	5.61	3.62	545	2016-08-03
627	27.5	4.08	3.68	510	2016-08-03
624	23.5	4.96	3.91	539	2016-08-03
622	9.7	6.7	4.19	571	2016-08-03
618	18.6	6.45	4.04	556	2016-08-03
579					2016-08-03
140					2016-08-03
523					2016-08-03
211					2016-08-03
375					2016-08-03
234					2016-08-03
359					2016-08-03
121					2016-08-03
392					2016-08-03
278					2016-08-03
346					2016-08-03
135	20	5.09	3.92	549	2016-08-03
132	19	4.18	3.76	546	2016-08-03
212	25.3	6.14	4.05	498	2016-08-03
535	23.4	5.08	3.57	524	2016-08-03
257					2016-08-03
453					2016-08-03
58					2016-08-03
323					2016-08-03
602					2016-08-03
485					2016-08-03
205					2016-08-03
114					2016-08-03
540					2016-08-03
411					2016-08-03
246					2016-08-03
528	18.2	6.18	4.09	465	2016-08-03
441					2016-08-03
63					2016-08-03
546					2016-08-03
287	20.8	6.34	4.03	408	2016-08-03
492					2016-08-03
45					2016-08-03
247	18.1	4.41	3.92	433	2016-08-03
336					2016-08-03
400	24.9	4.25	3.66	403	2016-08-03
435					2016-08-03
177					2016-08-03
616	19.8	5.02	3.78	418	2016-08-03
1	21.8	5.24	3.71	437	2016-08-03
393					2016-08-03
518					2016-08-03
251	27	4.84	3.77	505	2016-08-03
548	22.8	5.18	4.09	459	2016-08-03
447	15.1	5.56	3.63	590	2016-08-03
491	24.9	4.1	3.64	469	2016-08-03
158	22.6	5.39	3.77	544	2016-08-03
427	23.3	5.31	3.78	430	2016-08-03
418	24.7	5.11	4	498	2016-08-03
603	23.9	4.76	3.7	430	2016-08-03
604	21.8	3.93	3.82	400	2016-08-03
107	18	5.12	3.48	480	2016-08-03
396					2016-08-03
608					2016-08-03
92	16.7	3.97	3.66	462	2016-08-03
310					2016-08-03
356	24.6	4.69	4.05	477	2016-08-03
169					2016-08-03
470					2016-08-03
104					2016-08-03
426					2016-08-03
425					2016-08-03
480					2016-08-03
499					2016-08-03
433	23.3	5.43	3.99	442	2016-08-03
450					2016-08-03
6					2016-08-03
423					2016-08-03
335					2016-08-03
590					2016-08-03
407					2016-08-03
354					2016-08-03
118	11.8	4.33	3.23	580	2016-08-03
311	23.5	5.06	3.87	552	2016-08-03
421					2016-08-03
314					2016-08-03
245	39.2	3.99	3.34	623	2016-08-03
614	23	4.1	3.23	546	2016-08-03
95					2016-08-03
204	29.7	4.61	3.98	532	2016-08-03
78	22	4.04	3.45	592	2016-08-03
428					2016-08-03
414	9.9	5.84	5.18	383	2016-08-03
139	15.7	6.01	4.08	426	2016-08-03
178					2016-08-03
625	20.4	5.36	4.84	399	2016-08-03
598	16.5	4.44	3.54	409	2016-08-03
597	15.7	5.29	3.97	357	2016-08-03
208					2016-08-03
343					2016-08-03
64					2016-08-03
117					2016-08-03
180	16.2	5.09	3.64	476	2016-08-03
145	16.1	4.63	3.94	426	2016-08-03
633	29.2	4.54	3.95	526	2016-08-03
46	11.1	4.94	3.76	559	2016-08-03
277	11.4	5.09	4.25	426	2016-08-03
21					2016-08-03
264	17	4.79	3.82	464	2016-08-03
596	15.2	3.98	3.17	474	2016-08-03
175					2016-08-03
650	16.1	5.21	3.65	474	2016-08-03
142					2016-08-03
161	16	4.75	3.72	568	2016-08-03
194					2016-08-03
573					2016-08-03
599					2016-08-03
565	15.5	5.7	3.88	464	2016-08-03
82	14.4	5.24	3.79	494	2016-08-03
4	12.6	5.3	3.66	435	2016-08-03
476					2016-08-03
430					2016-08-03
498					2016-08-03
76	15.1	5.36	4.08	491	2016-08-03
84	9.6	6.27	3.94	496	2016-08-03
18					2016-08-03
532					2016-08-03
124					2016-08-03
32					2016-08-03
459					2016-08-03
355					2016-08-03
413	12.1	7	4.46	514	2016-08-03
545					2016-08-03
474					2016-08-03
404					2016-08-03
112	16.8	4.78	3.18	537	2016-08-03
91					2016-08-03
268	18.5	4.54	3.6	454	2016-08-03
232	17.7	5.39	3.75	541	2016-08-03
153	18.5	4.78	3.71	487	2016-08-03
109	14.8	5.44	3.75	472	2016-08-03
40					2016-08-03
61	23.4	5.43	3.96	475	2016-08-03
68	13.9	4.81	3.81	447	2016-08-03
286					2016-08-03
394					2016-08-03
52	14.1	6.07	4.36	570	2016-08-03
617	10	4.96	4.08	598	2016-08-03
460	21.4	4.02	3.44	516	2016-08-03
307	16.3	5.07	3.38	596	2016-08-03
99	12.9	5.83	3.96	506	2016-08-03
273	15.3	4.49	3.66	466	2016-08-03
295	12.3	5.27	4.05	502	2016-08-03
541					2016-08-03
22					2016-08-03
589	11	5.7	3.81	546	2016-08-03
159	14.1	5.7	4.26	409	2016-08-03
14					2016-08-03
519					2016-08-03
398					2016-08-03
258					2016-08-03
87					2016-08-03
214					2016-08-03
360					2016-08-03
405					2016-08-03
338					2016-08-03
235	17.4	4.96	3.75	481	2016-08-03
254	25.9	4.87	3.49	503	2016-08-03
432					2016-08-03
201					2016-08-03
143					2016-08-03
189	17.6	4.82	3.68	462	2016-08-03
15					2016-08-03
231					2016-08-03
283					2016-08-03
69					2016-08-03
348					2016-08-03
133					2016-08-03
164	15.8	5.86	4.03	434	2016-08-03
167					2016-08-03
111					2016-08-03
71					2016-08-03
402					2016-08-03
644					2016-08-03
10					2016-08-03
472					2016-08-03
35					2016-08-03
65					2016-08-03
429					2016-08-03
171					2016-08-03
294					2016-08-03
381	15.6	3.78	3.35	505	2016-08-03
458					2016-08-03
101	18.6	5.02	3.96	411	2016-08-03
70	21.2	3.88	3.62	471	2016-08-03
79					2016-08-03
431	17	4.4	3.49	407	2016-08-03
347					2016-08-03
641					2016-08-03
151					2016-08-03
530	16	5.6	4.04	382	2016-08-03
495					2016-08-03
7					2016-08-03
574					2016-08-03
318					2016-08-03
88					2016-08-03
526					2016-08-03
298					2016-08-03
438					2016-08-03
468					2016-08-03
230					2016-08-03
564					2016-08-03
560					2016-08-03
324	26.2	4.44	3.61	446	2016-08-03
259					2016-08-03
13					2016-08-03
225	16.3	4.61	3.75	376	2016-08-03
449	23.5	3.68	3.6	403	2016-08-03
512					2016-08-03
368	14.7	4.6	3.52	438	2016-08-03
50					2016-08-03
473					2016-08-03
244					2016-08-03
329	11.8	4.55	4.03	465	2016-08-03
549					2016-08-03
373					2016-08-03
280					2016-08-03
185					2016-08-03
261	18.1	4.24	3.59	421	2016-08-03
228	26.5	4.49	3.35	453	2016-08-03
620	22.7	5.17	3.69	425	2016-08-03
562					2016-08-03
479	25.3	3.99	3.5	498	2016-08-03
149					2016-08-03
349					2016-08-03
607	19	5.51	3.9	450	2016-08-03
529	5.5	6.8	5.03	356	2016-08-03
27	30.4	4.72	3.92	479	2016-08-04
47	33.1	4.32	3.79	508	2016-08-04
125					2016-08-04
144	21.3	4.83	3.99	535	2016-08-04
253	20	5.86	3.84	525	2016-08-04
274	20.5	4.05	3.49	530	2016-08-04
192	28.4	5.13	4.14	521	2016-08-04
200	26.9	5.28	4.06	564	2016-08-04
361	19.7	6.79	4.41	561	2016-08-04
11	25.5	5.09	4.19	462	2016-08-04
466	22.3	5.7	3.95	547	2016-08-04
483	14.9	5.03	3.82	475	2016-08-04
632					2016-08-04
380	24.3	6.57	4.36	513	2016-08-04
8	31	4.5	3.78	553	2016-08-04
181	22	6.07	3.66	480	2016-08-04
24	29.8	5.77	3.84	608	2016-08-04
36					2016-08-04
37	25.6	4.31	3.72	529	2016-08-04
134	22.5	4.57	3.76	645	2016-08-04
209	23.2	5.53	3.77	572	2016-08-04
281	19.2	5.25	3.58	574	2016-08-04
269					2016-08-04
306	18.5	4.44	3.96	511	2016-08-04
54	17	5.86	4.2	522	2016-08-04
537	18.8	5.26	3.81	475	2016-08-04
113	14.3	5.81	3.64	500	2016-08-04
403	24.1	3.84	4.02	492	2016-08-04
188	18.2	5.12	4	559	2016-08-04
146	24.1	4.97	3.93	502	2016-08-04
384	37.1	4.65	3.92	495	2016-08-04
494	23.5	5.88	4.28	494	2016-08-04
183	23.1	6.11	3.54	624	2016-08-04
86	24.2	5.63	3.88	517	2016-08-04
543	16.8	5.97	3.94	579	2016-08-04
544	28.8	5.28	4.04	507	2016-08-04
547					2016-08-04
241	26.6	4.76	3.69	451	2016-08-04
410					2016-08-04
342	20	4.29	3.39	726	2016-08-04
173	25	3.91	3.36	533	2016-08-04
504	10.9	6.59	4.5	509	2016-08-04
179	22.4	5.28	4	457	2016-08-04
389					2016-08-04
2	13.3	4.93	3.72	559	2016-08-04
66	26.2	5.28	4.83	497	2016-08-04
119	29	5.03	4.14	479	2016-08-04
366	24.3	4.42	3.73	484	2016-08-04
369					2016-08-04
556	19.3	5.75	4.04	506	2016-08-04
291	24.5	6.48	4.86	493	2016-08-04
352	24.8	5.13	3.6	525	2016-08-04
292	20.9	5.26	3.99	460	2016-08-04
100	30.2	4.37	3.67	565	2016-08-04
490	34.5	4.8	3.74	590	2016-08-04
42					2016-08-04
406					2016-08-04
239					2016-08-04
103	33.1	4.57	3.62	493	2016-08-04
508	14.4	6.43	5.33	481	2016-08-04
195					2016-08-04
219					2016-08-04
267					2016-08-04
382					2016-08-04
477					2016-08-04
377					2016-08-04
216					2016-08-04
344	26.2	4.93	3.8	523	2016-08-04
74	11	5.18	3.98	601	2016-08-04
319					2016-08-04
90	22.5	4.5	3.73	568	2016-08-04
98	19.5	5.45	3.59	436	2016-08-04
236					2016-08-04
265	20.4	5.08	3.76	455	2016-08-04
193	25.8	4.74	3.84	446	2016-08-04
288					2016-08-04
233	11	6.08	4.05	562	2016-08-04
437					2016-08-04
385					2016-08-04
443	12.7	5.42	3.83	390	2016-08-04
299					2016-08-04
454	11.3	5.16	3.71	538	2016-08-04
553	17.6	4.72	3.55	501	2016-08-04
424					2016-08-04
643	20.9	4.53	3.31	476	2016-08-04
484	20.1	5.79	3.77	494	2016-08-04
89	20.3	4.45	3.83	534	2016-08-04
150	17.2	6.23	4.39	567	2016-08-04
645	14.1	5.1	3.32	465	2016-08-04
38	30	4.16	3.65	504	2016-08-04
457	22.8	5.41	3.7	500	2016-08-04
248	19.1	4.9	3.67	507	2016-08-04
170	11.6	5.71	4.16	586	2016-08-04
640	16.9	5.31	3.88	567	2016-08-04
60					2016-08-04
106	16.9	5.12	3.93	425	2016-08-04
379	11.9	5.87	3.63	614	2016-08-04
12	20.6	5.33	3.88	447	2016-08-04
451	16.5	4.11	3.49	476	2016-08-04
517	23.2	5.75	3.94	402	2016-08-04
636	23.8	3.85	3.55	468	2016-08-04
634	15.3	5.81	4.21	596	2016-08-04
631					2016-08-04
629	15.8	5.65	3.71	541	2016-08-04
627	27.4	3.82	3.82	538	2016-08-04
624	23.6	5.06	3.93	523	2016-08-04
622	9.8	6.72	4.2	568	2016-08-04
618	18.5	6.28	4.05	560	2016-08-04
579					2016-08-04
140					2016-08-04
523					2016-08-04
211					2016-08-04
375					2016-08-04
234					2016-08-04
359					2016-08-04
121					2016-08-04
392					2016-08-04
278					2016-08-04
346					2016-08-04
135	20.2	5.68	3.98	548	2016-08-04
132	19.7	4.14	3.77	523	2016-08-04
212	23.9	6.21	4.05	506	2016-08-04
535	21.6	5.36	3.65	507	2016-08-04
257					2016-08-04
453					2016-08-04
58					2016-08-04
323					2016-08-04
602					2016-08-04
485					2016-08-04
205					2016-08-04
114					2016-08-04
540					2016-08-04
411					2016-08-04
246					2016-08-04
528	16.6	6.23	4.16	463	2016-08-04
441					2016-08-04
63					2016-08-04
546					2016-08-04
287	20.5	6.32	4.04	410	2016-08-04
492					2016-08-04
45					2016-08-04
247	16.5	4.46	3.97	444	2016-08-04
336					2016-08-04
400	24.4	4.35	3.65	407	2016-08-04
435					2016-08-04
177					2016-08-04
616	19	5.26	3.77	425	2016-08-04
1	21.8	5.5	3.7	437	2016-08-04
393					2016-08-04
518					2016-08-04
251	25.9	4.91	3.76	499	2016-08-04
548	23.3	5.81	4.08	456	2016-08-04
447	16	5.47	3.66	585	2016-08-04
491	24.1	4.13	3.66	466	2016-08-04
158	22.7	5.72	3.79	537	2016-08-04
427	23	5.27	3.8	377	2016-08-04
418	23.8	4.98	4.01	498	2016-08-04
603	25.2	4.68	3.72	427	2016-08-04
604	21.7	3.72	3.8	400	2016-08-04
107	18.1	4.89	3.52	495	2016-08-04
396					2016-08-04
608					2016-08-04
92	17.7	4.38	3.55	481	2016-08-04
310					2016-08-04
356	25.6	4.93	4.1	476	2016-08-04
169					2016-08-04
470					2016-08-04
104					2016-08-04
426					2016-08-04
425					2016-08-04
480					2016-08-04
499					2016-08-04
433	22.3	5.57	4.05	433	2016-08-04
450					2016-08-04
6					2016-08-04
423					2016-08-04
335					2016-08-04
590					2016-08-04
407					2016-08-04
354					2016-08-04
118	11.1	4.44	3.21	572	2016-08-04
311	22.8	4.97	3.93	537	2016-08-04
421					2016-08-04
314					2016-08-04
245	37.4	4.07	3.32	633	2016-08-04
614	24.1	4.17	3.28	548	2016-08-04
95					2016-08-04
204	27.9	4.45	3.96	546	2016-08-04
78	21.6	4.12	3.47	595	2016-08-04
428					2016-08-04
414	12.1	6.44	5.1	387	2016-08-04
139	15.6	5.88	4	424	2016-08-04
178					2016-08-04
625	13	6.47	4.9	425	2016-08-04
598	17.2	4.35	3.52	411	2016-08-04
597	15.5	5.3	3.99	348	2016-08-04
208					2016-08-04
343					2016-08-04
64					2016-08-04
117					2016-08-04
180	16	5.09	3.62	473	2016-08-04
145	16.3	4.64	3.94	494	2016-08-04
633	28.5	4.82	3.91	499	2016-08-04
46	11.3	5.01	3.74	552	2016-08-04
277	12.2	5.28	4.24	392	2016-08-04
21					2016-08-04
264	17.1	4.52	3.82	468	2016-08-04
596	14.6	3.84	3.11	474	2016-08-04
175					2016-08-04
650	16.7	5.28	3.57	474	2016-08-04
142					2016-08-04
161	15.8	4.77	3.75	559	2016-08-04
194					2016-08-04
573					2016-08-04
599					2016-08-04
565	16.4	5.61	3.79	463	2016-08-04
82	13.1	5.35	3.84	492	2016-08-04
4	11.8	5.68	3.66	425	2016-08-04
476					2016-08-04
430					2016-08-04
498					2016-08-04
76	14.3	5.5	4.09	495	2016-08-04
84	10.8	6.75	3.98	504	2016-08-04
18					2016-08-04
532					2016-08-04
124					2016-08-04
32					2016-08-04
459					2016-08-04
355					2016-08-04
413	11.3	7.5	4.53	500	2016-08-04
545					2016-08-04
474					2016-08-04
404					2016-08-04
112	16.5	4.57	3.18	541	2016-08-04
91					2016-08-04
268	16.5	4.54	3.62	474	2016-08-04
232	15.8	5.15	3.74	537	2016-08-04
153	18.8	5.1	3.69	489	2016-08-04
109	15	5.41	3.75	477	2016-08-04
40					2016-08-04
61	22.5	5.49	4	472	2016-08-04
68	14.3	4.96	3.78	452	2016-08-04
286					2016-08-04
394					2016-08-04
52	14.4	6.36	4.37	553	2016-08-04
617	8.9	5.17	4.12	581	2016-08-04
460	20.9	3.97	3.44	512	2016-08-04
307	11.6	5.16	3.39	583	2016-08-04
99	13.3	5.85	3.93	506	2016-08-04
273	15.8	4.48	3.65	475	2016-08-04
295	12.2	5.31	4.03	504	2016-08-04
541					2016-08-04
22					2016-08-04
589	11.6	5.66	3.84	551	2016-08-04
159	14	5.78	4.28	400	2016-08-04
14					2016-08-04
519					2016-08-04
398					2016-08-04
258					2016-08-04
87					2016-08-04
214					2016-08-04
360					2016-08-04
405					2016-08-04
338					2016-08-04
235	16.4	4.93	3.76	478	2016-08-04
254	25	4.78	3.54	497	2016-08-04
432					2016-08-04
201					2016-08-04
143					2016-08-04
189	17	4.78	3.7	462	2016-08-04
15					2016-08-04
231					2016-08-04
283					2016-08-04
69					2016-08-04
348					2016-08-04
133					2016-08-04
164	15.2	5.89	4.03	437	2016-08-04
167					2016-08-04
111					2016-08-04
71					2016-08-04
402					2016-08-04
644					2016-08-04
10					2016-08-04
472					2016-08-04
35					2016-08-04
65					2016-08-04
429					2016-08-04
171					2016-08-04
294					2016-08-04
381	14.9	3.53	3.33	485	2016-08-04
458					2016-08-04
101	19.2	5.14	3.94	411	2016-08-04
70	15.3	4.06	3.61	438	2016-08-04
79					2016-08-04
431	17.2	4.35	3.47	408	2016-08-04
347					2016-08-04
641					2016-08-04
151					2016-08-04
530	15.6	5.65	4.04	403	2016-08-04
495					2016-08-04
7					2016-08-04
574					2016-08-04
318					2016-08-04
88					2016-08-04
526					2016-08-04
298					2016-08-04
438					2016-08-04
468					2016-08-04
230					2016-08-04
564					2016-08-04
560					2016-08-04
324	25.8	4.4	3.59	450	2016-08-04
259					2016-08-04
13					2016-08-04
225	17.4	4.51	3.78	384	2016-08-04
449	22.4	3.83	3.6	398	2016-08-04
512					2016-08-04
368	14.2	4.7	3.5	427	2016-08-04
50					2016-08-04
473					2016-08-04
244					2016-08-04
329					2016-08-04
549					2016-08-04
373					2016-08-04
280					2016-08-04
185					2016-08-04
261	18	4.2	3.59	407	2016-08-04
228	26.4	4.33	3.37	416	2016-08-04
620	22.6	5.22	3.71	417	2016-08-04
562					2016-08-04
479	26.2	3.78	3.54	556	2016-08-04
149					2016-08-04
349					2016-08-04
607	18.6	5.02	3.87	452	2016-08-04
529	4.8	5.35	4.94	338	2016-08-04
27	33	4.57	3.91	483	2016-08-05
[truncated: 9,055 more rows]

## Sheet: September 2016
Animal Number	Day Production	Fat indication	Protein indication	Weight	Date
[truncated: 10,209 more rows]

[truncated: 26 more sheets: October 2016, November 2106, December 2016, January 2017, February 2017, March 2017___, April 2017, May 2017, June 2017, July 2017, August 2017, September 2017, October 2017, November 2017, December 2017, January 2018, February 2018, March 2018, April 2018, May 2018 …]
